# Supplementary material for: Genetically controlled mtDNA deletions prevent ROS damage by arresting oxidative phosphorylation
Source: eLife. 2022 Jul 8;11:e76095. doi: 10.7554/eLife.76095 (PMC9427111; doi:10.7554/eLife.76095)
Supplement: Figure 1—figure supplement 1—source data 2. — Data are shown in Figure 1—figure supplement 1. [file elife-76095-fig1-figsupp1-data2.xlsx]

## Sheet: silvanas_vit_c_data.csv
README: Average growth curves
Environment	Strain	Time (h)	Average # cells	S.D cells	S.E.M cells	n
SC	MIP1	0	8939.65227489305	18105.4265104707	987.731993734428	336
SC	SOD2	0	7514.89179733874	4966.67573775666	384.332907433973	167
SC	wt	0	11439.008208334	39429.5705671905	1469.45333519772	720
SC	MIP1	0.333333333333333	9146.26059506386	21763.8737643656	1187.31665405558	336
SC	SOD2	0.333333333333333	7499.35793489667	4952.47587674034	383.234089198654	167
SC	wt	0.333333333333333	12115.3390068755	47041.8085478539	1753.14469495887	720
SC	MIP1	0.666666666666667	9788.34185399906	33374.9346654132	1820.75195736264	336
SC	SOD2	0.666666666666667	7429.81522482422	4891.44151526779	378.51110850962	167
SC	wt	0.666666666666667	14140.9316936824	72240.5637547186	2692.24685480764	720
SC	MIP1	1	10503.9422977511	46351.2832615036	2528.66981076405	336
SC	SOD2	1	7347.11797450876	4831.12274471996	373.843501908839	167
SC	wt	1	16801.4163320423	106622.809597178	3973.59750352178	720
SC	MIP1	1.33333333333333	11266.4255807321	60225.8435520619	3285.58912940347	336
SC	SOD2	1.33333333333333	7275.03192201955	4791.92754601317	370.810486372529	167
SC	wt	1.33333333333333	20070.8542335149	148907.785675441	5549.46551915428	720
SC	MIP1	1.66666666666667	11796.7118848407	69579.1726032743	3795.85506246312	336
SC	SOD2	1.66666666666667	7228.1647275121	4793.64052095582	370.943040353266	167
SC	wt	1.66666666666667	23321.5257448941	190544.677215339	7101.18085007088	720
SC	MIP1	2	12207.8162905708	76195.7637024581	4156.81970001766	336
SC	SOD2	2	7218.00045693815	4812.05381950247	372.367904173564	167
SC	wt	2	26318.8617329887	228187.96886907	8504.06350064742	720
SC	MIP1	2.33333333333333	12639.616611022	82493.2968779669	4500.37830083033	336
SC	SOD2	2.33333333333333	7274.64206187958	4871.88649694692	376.997895760687	167
SC	wt	2.33333333333333	29028.0503788724	261337.129350637	9739.45977121134	720
SC	MIP1	2.66666666666667	13093.0050272489	88085.3321450366	4805.44883535663	336
SC	SOD2	2.66666666666667	7379.18884500555	4946.62184881708	382.781090917562	167
SC	wt	2.66666666666667	31504.4022858435	290116.133351732	10811.9899257311	720
SC	MIP1	3	13610.7855926653	93375.491721147	5094.05070078427	336
SC	SOD2	3	7542.89760851395	5038.75051003657	389.910220760953	167
SC	wt	3	33792.2734337988	314829.740923992	11733.0117007449	720
SC	MIP1	3.33333333333333	14180.3924043072	97869.6001201484	5339.22441411476	336
SC	SOD2	3.33333333333333	7790.60234504717	5188.33833182197	401.485673941125	167
SC	wt	3.33333333333333	35948.2284211523	335908.312272687	12518.5636741493	720
SC	MIP1	3.66666666666667	14863.2156433502	102208.75856354	5575.94491434391	336
SC	SOD2	3.66666666666667	8153.17656013036	5421.09076389117	419.496597877522	167
SC	wt	3.66666666666667	38161.0544205801	354754.001633869	13220.9010490567	720
SC	MIP1	4	15628.0396678046	105578.836714427	5759.79775034817	336
SC	SOD2	4	8655.38539828055	5757.88770770804	445.558727854721	167
SC	wt	4	40446.8371194012	370842.421096916	13820.4810418885	720
SC	MIP1	4.33333333333333	16573.5459907782	109290.876195438	5962.30610635286	336
SC	SOD2	4.33333333333333	9354.38980219948	6245.01105423628	483.253464120054	167
SC	wt	4.33333333333333	42971.3306066357	385429.398772728	14364.1056030449	720
SC	MIP1	4.66666666666667	17665.5431387337	112458.719866681	6135.12614698692	336
SC	SOD2	4.66666666666667	10264.5731215005	6892.91587589778	533.389844467309	167
SC	wt	4.66666666666667	45761.8109890624	398605.679631647	14855.1565978978	720
SC	MIP1	5	19000.5547010247	115723.535424206	6313.23643773007	336
SC	SOD2	5	11442.6602604195	7738.62273080682	598.832605691508	167
SC	wt	5	48922.9655435707	410685.519010487	15305.3456313705	720
SC	MIP1	5.33333333333333	20567.7251270678	118531.084461778	6466.40079465834	336
SC	SOD2	5.33333333333333	12903.4660486104	8794.37060496034	680.52882896336	167
SC	wt	5.33333333333333	52411.2370147668	421410.983854497	15705.060106062	720
SC	MIP1	5.66666666666667	22474.4747914557	121597.683051254	6633.69746325738	336
SC	SOD2	5.66666666666667	14723.9015859375	10100.5889837819	781.607041792877	167
SC	wt	5.66666666666667	56359.138906662	431830.450217233	16093.3706906678	720
SC	MIP1	6	24572.6532930665	123785.794756793	6753.06874325323	336
SC	SOD2	6	16790.5740185535	11580.0787039267	896.093393567227	167
SC	wt	6	60455.1844186776	439780.993645122	16389.6699500483	720
SC	MIP1	6.33333333333333	26969.6336875145	125856.374346248	6866.02812064736	336
SC	SOD2	6.33333333333333	19201.3225803069	13276.0982228123	1027.33532422174	167
SC	wt	6.33333333333333	64885.8352729619	446506.879166517	16640.3289039603	720
SC	MIP1	6.66666666666667	29621.033399276	127747.063034503	6969.17364480837	336
SC	SOD2	6.66666666666667	21901.5566320901	15156.2527108764	1172.82604658347	167
SC	wt	6.66666666666667	69730.8289230263	452959.860124518	16880.817305287	720
SC	MIP1	7	32518.4645775658	129361.629934828	7057.25549046681	336
SC	SOD2	7	24955.7196383346	17265.5083545555	1336.04514862673	167
SC	wt	7	75017.5953101932	458938.111351043	17103.613574105	720
SC	MIP1	7.33333333333333	35600.8954246588	130915.108476861	7142.00469295918	336
SC	SOD2	7.33333333333333	28295.022824701	19548.0932174455	1512.67686834023	167
SC	wt	7.33333333333333	80667.1532445035	464218.083393682	17300.3865142157	720
SC	MIP1	7.66666666666667	38956.3516369567	132539.914801971	7230.64514503607	336
SC	SOD2	7.66666666666667	32033.6632703642	22063.4746416843	1707.32292681631	167
SC	wt	7.66666666666667	86956.8800217977	470196.969269281	17523.2064350082	720
SC	MIP1	8	42489.9192244571	134192.117007948	7320.78016494397	336
SC	SOD2	8	36066.6312415633	24773.1521282884	1917.00406599721	167
SC	wt	8	93673.2423389853	475410.616701663	17717.5076028336	720
SC	MIP1	8.33333333333333	46315.9494387733	135866.714956305	7412.13697276494	336
SC	SOD2	8.33333333333333	40560.6735377034	27740.7972710417	2146.64734173516	167
SC	wt	8.33333333333333	101064.944745352	479652.840545526	17875.6059510111	720
SC	MIP1	8.66666666666667	50337.5216323517	137512.783456212	7501.93737157336	336
SC	SOD2	8.66666666666667	45412.1758411825	30923.771736866	2392.95330075695	167
SC	wt	8.66666666666667	109006.909180153	482836.620949996	17994.2584411749	720
SC	MIP1	9	54642.7899659231	139055.054304643	7586.07514425265	336
SC	SOD2	9	50734.5732676941	34370.0869472495	2659.63717839999	167
SC	wt	9	117713.406020252	485496.52188415	18093.3870962112	720
SC	MIP1	9.33333333333333	59326.7159717553	141093.938286812	7697.30538450887	336
SC	SOD2	9.33333333333333	56655.6260677856	38199.9157044615	2955.9982252958	167
SC	wt	9.33333333333333	127365.033878594	488444.775808646	18203.2620327129	720
SC	MIP1	9.66666666666667	64324.5054819173	143155.567012936	7809.77645227505	336
SC	SOD2	9.66666666666667	63181.1930597046	42386.5768382376	3279.97179050216	167
SC	wt	9.66666666666667	137975.639643935	491482.02821372	18316.4537467558	720
SC	MIP1	10	69691.6816151459	145223.643404015	7922.59926900207	336
SC	SOD2	10	70423.9402891922	47014.9177210495	3638.1235608229	167
SC	wt	10	149672.786368629	495166.617902491	18453.7702969773	720
SC	MIP1	10.3333333333333	75403.9985748404	147385.338525874	8040.52940620846	336
SC	SOD2	10.3333333333333	78404.7709549043	52072.4407010059	4029.48643891945	167
SC	wt	10.3333333333333	162506.247618083	499182.196663225	18603.4220816107	720
SC	MIP1	10.6666666666667	81591.7158011197	150043.555149862	8185.54701207764	336
SC	SOD2	10.6666666666667	87275.5867794241	57659.9800546956	4461.86321537784	167
SC	wt	10.6666666666667	176673.874900197	503698.958028366	18771.7518391207	720
SC	MIP1	11	88213.8800718115	152488.000686227	8318.90244901323	336
SC	SOD2	11	97141.8046294792	63781.1012278723	4935.52979267392	167
SC	wt	11	192270.172764942	507976.717795897	18931.1745329809	720
SC	MIP1	11.3333333333333	95432.2508763238	155332.028622448	8474.05689301682	336
SC	SOD2	11.3333333333333	108101.471610551	70477.3305025798	5453.6995709883	167
SC	wt	11.3333333333333	209492.038089869	512709.495720193	19107.5547523332	720
SC	MIP1	11.6666666666667	103091.07714578	158341.245171317	8638.22311465622	336
SC	SOD2	11.6666666666667	120044.690012908	77704.0082245902	6012.91668252115	167
SC	wt	11.6666666666667	228095.381282431	516768.990918702	19258.8432059698	720
SC	MIP1	12	111512.75494937	161902.709999493	8832.51694989479	336
SC	SOD2	12	133396.885258286	85626.7856793902	6625.99960859334	167
SC	wt	12	248700.174202366	520801.882527096	19409.1402023408	720
SC	MIP1	12.3333333333333	120455.631666984	165481.493731771	9027.75560881191	336
SC	SOD2	12.3333333333333	148037.411617286	94203.8265333079	7289.71095650894	167
SC	wt	12.3333333333333	271068.429148235	524698.12570824	19554.3446125059	720
SC	MIP1	12.6666666666667	129898.76332585	169239.439920754	9232.76838105701	336
SC	SOD2	12.6666666666667	163837.142377885	103333.196900834	7996.16284538898	167
SC	wt	12.6666666666667	295050.250572461	528676.327366175	19702.6034347617	720
SC	MIP1	13	139973.530517325	173334.652093849	9456.18052117736	336
SC	SOD2	13	181160.072984425	113164.934150276	8756.96551536792	167
SC	wt	13	321076.933543309	533469.718851458	19881.2425881594	720
SC	MIP1	13.3333333333333	150815.607803334	178120.007995801	9717.24308841544	336
SC	SOD2	13.3333333333333	200146.251536154	123761.109388531	9576.92217290443	167
SC	wt	13.3333333333333	349283.824726244	538912.063675824	20084.066804564	720
SC	MIP1	13.6666666666667	162351.907392785	183236.704208902	9996.38175156579	336
SC	SOD2	13.6666666666667	220811.123240265	135153.69751411	10458.5071099309	167
SC	wt	13.6666666666667	379682.062892217	545528.278906929	20330.6385880726	720
SC	MIP1	14	174679.374967002	188899.99864649	10305.3397925547	336
SC	SOD2	14	243356.403908831	147416.626021844	11407.4410077499	167
SC	wt	14	412522.446720865	553350.175583578	20622.1434661054	720
SC	MIP1	14.3333333333333	187831.152633921	195144.383206602	10645.9988986872	336
SC	SOD2	14.3333333333333	267709.18223278	160401.301592299	12412.2253700836	167
SC	wt	14.3333333333333	447571.024132072	561386.267508898	20921.6309297463	720
SC	MIP1	14.6666666666667	201759.268156023	201690.273837843	11003.1065095034	336
SC	SOD2	14.6666666666667	293935.542758186	174217.165892246	13481.3290473673	167
SC	wt	14.6666666666667	484887.773897378	569612.083660419	21228.1889978332	720
SC	MIP1	15	216576.199366941	208630.133844984	11381.7069118263	336
SC	SOD2	15	322335.449014186	188913.995642966	14618.6038779379	167
SC	wt	15	524993.608781998	578508.939698482	21559.7552459522	720
SC	MIP1	15.3333333333333	232142.269296359	216187.281374683	11793.9831093596	336
SC	SOD2	15.3333333333333	352581.896350815	204243.346639472	15804.8246720146	167
SC	wt	15.3333333333333	567346.713221267	587488.264849943	21894.3949364645	720
SC	MIP1	15.6666666666667	248494.929816306	224086.694994194	12224.9314528973	336
SC	SOD2	15.6666666666667	384608.246439766	220085.958073401	17030.7627511732	167
SC	wt	15.6666666666667	611602.732411683	596769.17916695	22240.2741915675	720
SC	MIP1	16	265973.756180284	232680.257374794	12693.7487159738	336
SC	SOD2	16	419323.321904426	236964.487817501	18336.8625958735	167
SC	wt	16	659204.707058967	607343.958428378	22634.372946161	720
SC	MIP1	16.3333333333333	284091.859161634	241699.356926746	13185.7809349876	336
SC	SOD2	16.3333333333333	455921.741252341	254291.792230748	19677.6896670897	167
SC	wt	16.3333333333333	708766.123886446	618587.40540793	23053.3914752892	720
SC	MIP1	16.6666666666667	302971.169792558	250928.591536325	13689.2769612365	336
SC	SOD2	16.6666666666667	494556.182622628	272267.127374756	21068.6628617918	167
SC	wt	16.6666666666667	760473.866614284	630847.684251096	23510.3050905629	720
SC	MIP1	17	322853.78960364	260539.366146618	14213.5877009844	336
SC	SOD2	17	535729.663054903	291012.861306379	22519.251304511	167
SC	wt	17	814936.838124868	644019.965045494	24001.2070118127	720
SC	MIP1	17.3333333333333	343686.45156363	270755.804085066	14770.9400841482	336
SC	SOD2	17.3333333333333	579399.20076678	310408.280767987	24020.1139229248	167
SC	wt	17.3333333333333	872111.950246018	657796.761556038	24514.637903642	720
SC	MIP1	17.6666666666667	365172.140138755	281233.890433922	15342.5665583377	336
SC	SOD2	17.6666666666667	624875.506657194	330117.224096806	25545.2377465787	167
SC	wt	17.6666666666667	931300.21059429	671771.515495815	25035.4462332783	720
SC	MIP1	18	387492.080001489	292102.197442027	15935.4813147741	336
SC	SOD2	18	672367.452904027	350180.154711855	27097.7539288432	167
SC	wt	18	992749.880736892	686012.235076194	25566.1665171156	720
SC	MIP1	18.3333333333333	410418.829610512	303282.038004061	16545.3916199296	336
SC	SOD2	18.3333333333333	721729.499236751	370292.52208699	28654.0956424573	167
SC	wt	18.3333333333333	1056260.79070528	699894.130230029	26083.5142041239	720
SC	MIP1	18.6666666666667	434285.176838556	314872.752300119	17177.7169249331	336
SC	SOD2	18.6666666666667	773228.039475688	390726.554745441	30235.3285630044	167
SC	wt	18.6666666666667	1122278.51764515	714327.56970141	26621.4167342429	720
SC	MIP1	19	458996.259856641	326563.901848731	17815.521422166	336
SC	SOD2	19	826904.388379328	411464.329501623	31840.0657527437	167
SC	wt	19	1191050.17977742	728860.612535796	27163.0312625363	720
SC	MIP1	19.3333333333333	484001.361138334	338255.127269788	18453.3300585801	336
SC	SOD2	19.3333333333333	881992.082099337	432123.475066469	33438.718432982	167
SC	wt	19.3333333333333	1261209.06264364	743777.355409471	27718.94544701	720
SC	MIP1	19.6666666666667	509683.994844347	350064.091430115	19097.5618698148	336
SC	SOD2	19.6666666666667	939048.604487775	452820.117163541	35040.2726819978	167
SC	wt	19.6666666666667	1333539.47058485	758888.838235146	28282.1171609938	720
SC	MIP1	20	535634.406768773	361891.986656123	19742.8264553528	336
SC	SOD2	20	997310.260897642	473335.871083557	36627.8293836239	167
SC	wt	20	1406960.64537092	774110.093386313	28849.3798480084	720
SC	MIP1	20.3333333333333	561297.199589177	373137.595890972	20356.3247357645	336
SC	SOD2	20.3333333333333	1056059.70212234	493237.729237064	38167.8814046022	167
SC	wt	20.3333333333333	1480373.59649249	788349.361992972	29380.0460572479	720
SC	MIP1	20.6666666666667	587460.647277412	384517.168792812	20977.1313333711	336
SC	SOD2	20.6666666666667	1116430.55352384	512981.123318109	39695.6711075012	167
SC	wt	20.6666666666667	1555820.24326853	803056.53892185	29928.1501800827	720
SC	MIP1	21	615017.796200648	396193.578472715	21614.131704841	336
SC	SOD2	21	1179569.18864326	532929.741637856	41239.3415387788	167
SC	wt	21	1634322.1694134	817298.332079211	30458.9104737719	720
SC	MIP1	21.3333333333333	642758.850810969	407782.007521436	22246.3323393813	336
SC	SOD2	21.3333333333333	1243640.90958262	552431.947063875	42748.4675032095	167
SC	wt	21.3333333333333	1714088.34954602	831122.090076291	30974.0915168715	720
SC	MIP1	21.6666666666667	670697.264633982	419039.94231251	22860.503034012	336
SC	SOD2	21.6666666666667	1308473.77189621	571560.688837832	44228.6939825929	167
SC	wt	21.6666666666667	1794922.62607105	844707.430382265	31480.3872572319	720
SC	MIP1	22	698793.847900945	430448.604662425	23482.8965911153	336
SC	SOD2	22	1374360.83905194	590426.080420833	45688.541812371	167
SC	wt	22	1877083.58025763	857982.436599876	31975.1175289705	720
SC	MIP1	22.3333333333333	727388.685238109	441791.045521453	24101.6774697112	336
SC	SOD2	22.3333333333333	1441676.08731908	608809.333509314	47111.0806453131	167
SC	wt	22.3333333333333	1960745.37821832	871138.222007694	32465.4047034584	720
SC	MIP1	22.6666666666667	755129.646574968	452615.714194615	24692.2115598014	336
SC	SOD2	22.6666666666667	1508645.0963435	626451.550334696	48476.2763706016	167
SC	wt	22.6666666666667	2043770.14114781	883913.018139901	32941.4932459637	720
SC	MIP1	23	783198.021794253	463374.8955411	25279.1730233256	336
SC	SOD2	23	1577041.99316453	643797.58679547	49818.5529711747	167
SC	wt	23	2128218.41255898	896808.480589721	33422.0787566153	720
SC	MIP1	23.3333333333333	812608.577664444	474416.742407975	25881.5551552251	336
SC	SOD2	23.3333333333333	1648713.14514297	661359.877882101	51177.5638571109	167
SC	wt	23.3333333333333	2215994.86486199	909743.352131354	33904.1329574039	720
SC	MIP1	23.6666666666667	844285.432891381	486123.048232916	26520.1864951191	336
SC	SOD2	23.6666666666667	1725340.71785814	679860.808389007	52609.2088420852	167
SC	wt	23.6666666666667	2310070.34416797	924291.581772065	34446.3134645524	720
SC	MIP1	24	873098.7290529	496350.88421426	27078.1606925013	336
SC	SOD2	24	1797040.92073869	696248.375703315	53877.3168733382	167
SC	wt	24	2397583.45587056	936299.155894622	34893.8093309341	720
SC	MIP1	24.3333333333333	902495.279426256	506511.03391483	27632.4423005363	336
SC	SOD2	24.3333333333333	1869167.37719608	711532.28031862	55060.020920854	167
SC	wt	24.3333333333333	2485715.43385909	947636.317380609	35316.3203935101	720
SC	MIP1	24.6666666666667	931491.664782801	516229.687826102	28162.6383386493	336
SC	SOD2	24.6666666666667	1940751.38088545	725868.342834596	56169.3787446464	167
SC	wt	24.6666666666667	2573544.42313565	958073.352094205	35705.2857118955	720
SC	MIP1	25	959422.029851406	525448.41810519	28665.5613066886	336
SC	SOD2	25	2010737.02378095	739004.364097936	57185.8745883099	167
SC	wt	25	2659688.25672744	967861.120664981	36070.0543097671	720
SC	MIP1	25.3333333333333	985632.816516937	533719.378823892	29116.7792062535	336
SC	SOD2	25.3333333333333	2077851.53496965	750318.902752628	58061.4198759505	167
SC	wt	25.3333333333333	2742185.76225837	975883.505756695	36369.0309498796	720
SC	MIP1	25.6666666666667	1013493.09693219	542408.978647954	29590.835741404	336
SC	SOD2	25.6666666666667	2148853.16563866	762125.836015312	58975.067802315	167
SC	wt	25.6666666666667	2829290.62706517	985013.510364065	36709.2861321624	720
SC	MIP1	26	1040373.12422197	550566.671751613	30035.8743859723	336
SC	SOD2	26	2219706.40475323	773674.409764862	59868.7232693186	167
SC	wt	26	2916033.89610003	994179.791241426	37050.8932512063	720
SC	MIP1	26.3333333333333	1067471.79155561	558682.921936961	30478.6521339908	336
SC	SOD2	26.3333333333333	2291630.23652422	785155.239577392	60757.1365530892	167
SC	wt	26.3333333333333	3003109.86026296	1003174.3848296	37386.1019627588	720
SC	MIP1	26.6666666666667	1093221.21437615	566184.614138061	30887.9029953218	336
SC	SOD2	26.6666666666667	2362008.81899764	795587.547662467	61564.4127896077	167
SC	wt	26.6666666666667	3088459.25784813	1011586.57744808	37699.6058716709	720
SC	MIP1	27	1119297.37772729	573642.336116218	31294.7550843318	336
SC	SOD2	27	2432567.42142769	805753.520177206	62351.0793609286	167
SC	wt	27	3173984.29694497	1019854.03126481	38007.7156839217	720
SC	MIP1	27.3333333333333	1145165.07237746	580916.121226246	31691.5725945168	336
SC	SOD2	27.3333333333333	2502803.68476701	815441.457229723	63100.7544375851	167
SC	wt	27.3333333333333	3259237.6461828	1027629.86226766	38297.503795654	720
SC	MIP1	27.6666666666667	1170872.55256691	588059.013368003	32081.2493078562	336
SC	SOD2	27.6666666666667	2572149.05768269	824187.67748824	63777.5572808753	167
SC	wt	27.6666666666667	3343338.5655924	1034883.81528884	38567.8426633365	720
SC	MIP1	28	1196145.27064138	594881.92159439	32453.4694674652	336
SC	SOD2	28	2640838.29253572	832201.887216614	64397.7154486969	167
SC	wt	28	3427329.38748058	1042390.44007166	38847.5980516025	720
SC	MIP1	28.3333333333333	1222625.36732942	602013.008284015	32842.5021405902	336
SC	SOD2	28.3333333333333	2711358.43796248	840409.916983481	65032.8718613903	167
SC	wt	28.3333333333333	3513205.84023842	1050019.06558414	39131.9001386159	720
SC	MIP1	28.6666666666667	1247576.09681684	608353.379243636	33188.3977341207	336
SC	SOD2	28.6666666666667	2780494.00478592	847626.154391046	65591.2810771359	167
SC	wt	28.6666666666667	3597044.08245095	1057634.42899553	39415.7079763031	720
SC	MIP1	29	1272607.27686677	614842.552851962	33542.4111776667	336
SC	SOD2	29	2850409.24129002	854979.906787602	66160.3315222117	167
SC	wt	29	3682008.71691113	1065979.03776168	39726.693183749	720
SC	MIP1	29.3333333333333	1296683.22317322	620888.066480067	33872.2209849962	336
SC	SOD2	29.3333333333333	2919648.06925456	862325.479748769	66728.7490235743	167
SC	wt	29.3333333333333	3765295.61451292	1074174.09163919	40032.104809572	720
SC	MIP1	29.6666666666667	1318962.24999058	626413.82186087	34173.675655286	336
SC	SOD2	29.6666666666667	2986340.51931462	869021.247668948	67246.8831012034	167
SC	wt	29.6666666666667	3845247.90817863	1082036.88578828	40325.1338464128	720
SC	MIP1	30	1341593.70569016	631892.029312243	34472.5363733644	336
SC	SOD2	30	3052875.30968739	875283.654958586	67731.4827264347	167
SC	wt	30	3924411.83769192	1089002.39525593	40584.7230575393	720
SC	MIP1	30.3333333333333	1363872.98953386	637138.246772746	34758.7409998519	336
SC	SOD2	30.3333333333333	3118266.93449324	881402.33953882	68204.9607545081	167
SC	wt	30.3333333333333	4002203.29066331	1095434.35371709	40824.427996666	720
SC	MIP1	30.6666666666667	1386677.55151492	642713.908647332	35062.9182925873	336
SC	SOD2	30.6666666666667	3184610.23531622	887280.154318001	68659.7997177743	167
SC	wt	30.6666666666667	4081806.99516366	1102125.88597823	41073.8066801583	720
SC	MIP1	31	1409404.0957867	648300.320255987	35367.6820313949	336
SC	SOD2	31	3250323.16692053	892955.618656034	69098.9803337933	167
SC	wt	31	4161522.87902563	1109322.97201848	41342.0262405903	720
SC	MIP1	31.3333333333333	1432642.3127476	653955.081487986	35676.1745478537	336
SC	SOD2	31.3333333333333	3316281.28744631	898435.97253861	69523.0628494778	167
SC	wt	31.3333333333333	4242032.74243076	1117381.32901748	41642.3434745358	720
SC	MIP1	31.6666666666667	1453746.18781562	659032.232893873	35953.1558649041	336
SC	SOD2	31.6666666666667	3379896.88107814	903496.176476882	69914.6331863574	167
SC	wt	31.6666666666667	4319511.79862914	1126266.73152231	41973.4828746733	720
SC	MIP1	32	1475371.12250989	664409.368402452	36246.5026564528	336
SC	SOD2	32	3446751.24096842	909703.838886277	70394.9965255692	167
SC	wt	32	4400650.40592013	1136503.8411799	42354.9974261314	720
SC	MIP1	32.3333333333333	1493833.86661057	668648.613381635	36477.7724303405	336
SC	SOD2	32.3333333333333	3507381.76221592	914985.758763683	70803.7237569213	167
SC	wt	32.3333333333333	4473221.39439782	1145560.52355608	42692.5200501941	720
SC	MIP1	32.6666666666667	1515176.75547608	673481.977971261	36741.4540862129	336
SC	SOD2	32.6666666666667	3577145.47149795	921268.565687226	71289.9019532177	167
SC	wt	32.6666666666667	4555998.39553831	1155835.10737793	43075.4311812969	720
SC	MIP1	33	1536415.78672749	678195.154391631	36998.5789399037	336
SC	SOD2	33	3647518.59195769	927768.831444334	71792.9076192674	167
SC	wt	33	4638707.61335774	1165320.37501068	43428.9262348239	720
SC	MIP1	33.3333333333333	1560715.84026783	683646.388447551	37295.9681386201	336
SC	SOD2	33.3333333333333	3728149.44894781	935685.67096113	72405.5310539014	167
SC	wt	33.3333333333333	4734396.98154057	1177148.56389007	43869.7368079075	720
SC	MIP1	33.6666666666667	1579955.51168281	688182.127155754	37543.4129715115	336
SC	SOD2	33.6666666666667	3792203.36734303	940946.912220557	72812.6581257526	167
SC	wt	33.6666666666667	4811247.22816903	1186939.31468949	44234.6165468787	720
SC	MIP1	34	1596068.92971596	692337.103974498	37770.085540353	336
SC	SOD2	34	3847598.10229604	944650.198245164	73099.2270020086	167
SC	wt	34	4878645.5769619	1197904.54351129	44643.2664974517	720
SC	MIP1	34.3333333333333	1605898.19474882	695149.019317565	37923.4880987745	336
SC	SOD2	34.3333333333333	3886853.75360928	947364.58395816	73309.2724746861	167
SC	wt	34.3333333333333	4928542.22317746	1206874.8572697	44977.5703531733	720
SC	MIP1	34.6666666666667	1617104.30463114	698343.106118822	38097.7398195247	336
SC	SOD2	34.6666666666667	3926301.44108834	949774.266899432	73495.7393389858	167
SC	wt	34.6666666666667	4978321.51407562	1217145.60455094	45360.3385048496	720
SC	MIP1	35	1627498.86303401	701295.499358557	38258.8060755053	336
SC	SOD2	35	3961628.27208798	952297.086745912	73690.9609998563	167
SC	wt	35	5022386.23554639	1228548.92894394	45785.3153133869	720
SC	MIP1	35.3333333333333	1646019.81485194	705928.943035401	38511.5811514273	336
SC	SOD2	35.3333333333333	4026248.45981232	960176.751522065	74300.7077666931	167
SC	wt	35.3333333333333	5099889.20949352	1243613.2965858	46346.7311481409	720
SC	MIP1	35.6666666666667	1672498.13702604	712409.74916492	38865.1381115803	336
SC	SOD2	35.6666666666667	4114890.5633377	972569.039208541	75259.6517782973	167
SC	wt	35.6666666666667	5204207.19660898	1260735.03244289	46984.820569295	720
SC	MIP1	36	1694601.96469508	717955.778012828	39167.698790175	336
SC	SOD2	36	4189647.65249284	982929.387515156	76061.3595999777	167
SC	wt	36	5291656.64731916	1276031.0118176	47554.8680637	720
SC	MIP1	36.3333333333333	1715590.19003605	723625.303462412	39476.9967607368	336
SC	SOD2	36.3333333333333	4264839.64931618	994691.327545168	76971.5258454674	167
SC	wt	36.3333333333333	5379769.6936219	1291072.32291087	48115.4246316212	720
SC	MIP1	36.6666666666667	1736236.10584864	729374.924925265	39790.6643270567	336
SC	SOD2	36.6666666666667	4340822.88782301	1006373.10820032	77875.4891722998	167
SC	wt	36.6666666666667	5469281.21158755	1305351.25496692	48647.5690103447	720
SC	MIP1	37	1748203.25011448	732784.304186672	39976.6612144163	336
SC	SOD2	37	4385608.18004865	1012722.33566712	78366.8071445453	167
SC	wt	37	5522189.9840338	1316032.60614915	49045.6394659286	720
SC	MIP1	37.3333333333333	1761056.84274204	736743.089899366	40192.6306809464	336
SC	SOD2	37.3333333333333	4434045.85349848	1020138.07676898	78940.6544196532	167
SC	wt	37.3333333333333	5580662.39867613	1329080.76098585	49531.9154858586	720
SC	MIP1	37.6666666666667	1774420.98745872	740935.592538499	40421.3504511265	336
SC	SOD2	37.6666666666667	4484782.06895459	1028273.16381278	79570.1663549709	167
SC	wt	37.6666666666667	5641654.58032596	1342674.86881943	50038.537972681	720
SC	MIP1	38	1785561.01804006	744420.445696198	40611.4647770903	336
SC	SOD2	38	4529695.42232004	1035592.65333891	80136.5654595319	167
SC	wt	38	5695912.52933634	1356381.05467267	50549.3373606824	720
SC	MIP1	38.3333333333333	1796970.57191092	748125.884943318	40813.6130608164	336
SC	SOD2	38.3333333333333	4576834.84826739	1043785.48948642	80770.5461546609	167
SC	wt	38.3333333333333	5752533.32945966	1371260.27148845	51103.8530315497	720
SC	MIP1	38.6666666666667	1808647.62447317	752259.144637498	41039.1008633818	336
SC	SOD2	38.6666666666667	4626160.23617822	1053472.29165393	81520.1334112786	167
SC	wt	38.6666666666667	5811720.85894993	1386943.67337619	51688.3389105404	720
SC	MIP1	39	1819897.52197726	756314.079878769	41260.3157167302	336
SC	SOD2	39	4674039.40121442	1063248.34532029	82276.6271562319	167
SC	wt	39	5867193.48441459	1401864.48907345	52244.4048801874	720
SC	MIP1	39.3333333333333	1830947.41881912	760561.319821244	41492.0216516234	336
SC	SOD2	39.3333333333333	4720976.57729254	1073185.32958118	83045.5740844724	167
SC	wt	39.3333333333333	5922185.5682877	1416708.24689007	52797.5990721791	720
SC	MIP1	39.6666666666667	1841954.29070767	765107.531832771	41740.0378500537	336
SC	SOD2	39.6666666666667	4768569.63168132	1084415.91383876	83914.6227858166	167
SC	wt	39.6666666666667	5977693.67945118	1432175.38108281	53374.0251300471	720
SC	MIP1	40	1852377.62582085	769660.297669714	41988.4115889727	336
SC	SOD2	40	4813923.29606919	1094987.35598806	84732.665539469	167
SC	wt	40	6031575.11402044	1446900.04724719	53922.7810382062	720
SC	MIP1	40.3333333333333	1861527.51739705	773547.198432697	42200.4594099864	336
SC	SOD2	40.3333333333333	4854650.76313867	1104905.82993548	85500.1800966488	167
SC	wt	40.3333333333333	6081149.06663485	1462203.43490004	54493.1046228364	720
SC	MIP1	40.6666666666667	1870947.39845305	777411.071948391	42411.2509916698	336
SC	SOD2	40.6666666666667	4897125.91172834	1115406.50926825	86312.7470591576	167
SC	wt	40.6666666666667	6132534.6478184	1477269.64279758	55054.5890398703	720
SC	MIP1	41	1880017.79945484	781043.603130414	42609.4218143592	336
SC	SOD2	41	4938114.28955222	1125731.78766701	87111.7410898922	167
SC	wt	41	6181730.94282287	1493063.77261865	55643.2015052931	720
SC	MIP1	41.3333333333333	1888969.73043914	784747.943711186	42811.5101609221	336
SC	SOD2	41.3333333333333	4977060.72511323	1134734.09156836	87808.3602804113	167
SC	wt	41.3333333333333	6228837.605485	1507828.10516156	56193.4356920991	720
SC	MIP1	41.6666666666667	1898255.72828264	788976.354414176	43042.1888765865	336
SC	SOD2	41.6666666666667	5020794.70216086	1147235.17496253	88775.7231566372	167
SC	wt	41.6666666666667	6280891.02526332	1525577.56419401	56854.9189747725	720
SC	MIP1	42	1907440.57381693	793210.996976905	43273.2075680721	336
SC	SOD2	42	5063352.46553268	1158846.99722674	89674.2729406471	167
SC	wt	42	6329796.69164396	1541388.75328774	57444.1672017507	720
SC	MIP1	42.3333333333333	1915179.2887076	797255.086687664	43493.8307492238	336
SC	SOD2	42.3333333333333	5102962.65430492	1171218.68831436	90631.6231395809	167
SC	wt	42.3333333333333	6376975.00787475	1558566.64327086	58084.3493636218	720
SC	MIP1	42.6666666666667	1923608.72904385	801676.377215747	43735.0319220135	336
SC	SOD2	42.6666666666667	5143486.61071372	1184434.2814002	91654.2764357348	167
SC	wt	42.6666666666667	6423709.86823986	1573935.88640507	58657.1272371353	720
SC	MIP1	43	1932428.00022844	806243.159181241	43984.170303433	336
SC	SOD2	43	5185804.72185478	1198616.55539928	92751.7337468006	167
SC	wt	43	6473439.65109417	1590895.12358379	59289.1606901047	720
SC	MIP1	43.3333333333333	1940421.92216857	809937.920449064	44185.7360556304	336
SC	SOD2	43.3333333333333	5220771.90824241	1209716.96846435	93610.7094988476	167
SC	wt	43.3333333333333	6514860.80366979	1604646.80111189	59801.6554527295	720
SC	MIP1	43.6666666666667	1949172.66816857	814620.554036216	44441.1946611645	336
SC	SOD2	43.6666666666667	5260241.20648356	1222380.92663836	94590.6760039372	167
SC	wt	43.6666666666667	6563528.01587429	1622038.4470375	60449.8038282339	720
SC	MIP1	44	1957355.55119223	818846.329613319	44671.7296189261	336
SC	SOD2	44	5296365.67884166	1233204.25916076	95428.2106198641	167
SC	wt	44	6607866.47293774	1638574.29590123	61066.0585303166	720
SC	MIP1	44.3333333333333	1964820.17265599	822917.249063378	44893.8164823542	336
SC	SOD2	44.3333333333333	5332125.64416591	1244270.89876022	96284.5729026792	167
SC	wt	44.3333333333333	6652613.17257734	1657057.72480582	61754.8952551158	720
SC	MIP1	44.6666666666667	1972448.0307402	827307.637101309	45133.3317860929	336
SC	SOD2	44.6666666666667	5370879.61937191	1257838.66794745	97334.478403753	167
SC	wt	44.6666666666667	6698682.10873976	1675636.86855638	62447.2990616157	720
SC	MIP1	45	1980268.0192049	832455.240388162	45414.1565683501	336
SC	SOD2	45	5412677.00621167	1273120.24353253	98517.0022254991	167
SC	wt	45	6748550.25378664	1696521.35542524	63225.6179335151	720
SC	MIP1	45.3333333333333	1986824.90593365	836680.42871464	45644.6594889636	336
SC	SOD2	45.3333333333333	5448046.00597106	1287125.92471691	99600.794374293	167
SC	wt	45.3333333333333	6789698.42096349	1713668.04139295	63864.6371903925	720
SC	MIP1	45.6666666666667	1993266.67227267	840881.769823	45873.8614371706	336
SC	SOD2	45.6666666666667	5482221.78876194	1301851.12355135	100740.264470471	167
SC	wt	45.6666666666667	6829730.40047283	1730098.53822146	64476.9656539367	720
SC	MIP1	46	1999297.09630436	844979.346961446	46097.4025967283	336
SC	SOD2	46	5515429.78461069	1315950.66574181	101831.319801977	167
SC	wt	46	6869352.32576862	1746192.40637492	65076.748707471	720
SC	MIP1	46.3333333333333	2005500.46845423	849468.209493425	46342.2901245503	336
SC	SOD2	46.3333333333333	5549242.4605111	1329784.10014925	102901.783094999	167
SC	wt	46.3333333333333	6911850.99514753	1765216.70949186	65785.7426240385	720
SC	MIP1	46.6666666666667	2011154.72047473	853220.800455776	46547.010745231	336
SC	SOD2	46.6666666666667	5579469.44217483	1341823.77358627	103833.440996768	167
SC	wt	46.6666666666667	6949402.87281418	1780950.91981699	66372.122021693	720
SC	MIP1	47	2016906.85676056	857154.010796556	46761.5849608359	336
SC	SOD2	47	5610616.57158742	1353765.04971682	104757.484686361	167
SC	wt	47	6988505.13700791	1798785.11754824	67036.7633292134	720
SC	MIP1	47.3333333333333	2022457.3059582	861388.567137899	46992.5989485592	336
SC	SOD2	47.3333333333333	5641499.92408121	1365530.29526273	105667.90672035	167
SC	wt	47.3333333333333	7026901.64656266	1817147.10654674	67721.0742559261	720
SC	MIP1	47.6666666666667	2027957.54474298	865524.053871299	47218.2082460746	336
SC	SOD2	47.6666666666667	5672562.18170775	1378261.49626542	106653.076631744	167
SC	wt	47.6666666666667	7064972.48543025	1835752.43921318	68414.4540656954	720
SC	MIP1	48	2032774.57098437	869037.040210348	47409.8573629084	336
SC	SOD2	48	5701384.13959733	1391010.75503744	107639.643895282	167
SC	wt	48	7098543.56919232	1851691.63235075	69008.4727217303	720
SC	MIP1	48.3333333333333	2037597.26479981	872800.50024187	47615.1709399249	336
SC	SOD2	48.3333333333333	5730524.75115204	1405314.29782942	108746.48526728	167
SC	wt	48.3333333333333	7132504.75236108	1869030.17060005	69654.6418909956	720
SC	MIP1	48.6666666666667	2042721.24785944	877040.109265896	47846.460574087	336
SC	SOD2	48.6666666666667	5760302.54790076	1420747.91559039	109940.774465829	167
SC	wt	48.6666666666667	7166549.55618255	1884875.31309342	70245.1554864682	720
SC	MIP1	49	2047980.89101663	881308.700841834	48079.3313360821	336
SC	SOD2	49	5790558.53932761	1436366.48704033	111149.375810525	167
SC	wt	49	7202572.85549248	1901935.15034298	70880.9380827196	720
SC	MIP1	49.3333333333333	2053392.33812049	885623.644642569	48314.7308192529	336
SC	SOD2	49.3333333333333	5819144.00587154	1449843.52166453	112192.260060312	167
SC	wt	49.3333333333333	7237128.78775138	1917813.42271914	71472.6863560255	720
SC	MIP1	49.6666666666667	2058419.61475067	889753.723617024	48540.0450993313	336
SC	SOD2	49.6666666666667	5845184.20154737	1461716.89642269	113111.049383957	167
SC	wt	49.6666666666667	7270055.42522252	1934425.23809809	72091.7721629757	720
SC	MIP1	50	2062505.00352241	893348.182712652	48736.1389194282	336
SC	SOD2	50	5867246.11600675	1471357.29881123	113857.04611788	167
SC	wt	50	7298544.62616177	1949852.07377404	72666.6963837947	720
SC	MIP1	50.3333333333333	2064135.88347996	895796.510706073	48869.7061617607	336
SC	SOD2	50.3333333333333	5883086.10886471	1479359.27921563	114476.257952201	167
SC	wt	50.3333333333333	7319707.05542454	1964227.29124042	73202.4291078975	720
SC	MIP1	50.6666666666667	2064875.81147497	897687.77495246	48972.883085192	336
SC	SOD2	50.6666666666667	5896033.58300005	1486384.58824749	115019.89268666	167
SC	wt	50.6666666666667	7336156.03922892	1976681.68927802	73666.5771184127	720
SC	MIP1	51	2064524.84146542	898991.908338271	49044.0293942015	336
SC	SOD2	51	5905663.97482185	1495751.32794271	115744.712765586	167
SC	wt	51	7346390.45631063	1987995.14717181	74088.2048002643	720
SC	MIP1	51.3333333333333	2068107.62847208	903308.466853114	49279.5169672488	336
SC	SOD2	51.3333333333333	5932836.72566445	1512416.94513715	117034.336942543	167
SC	wt	51.3333333333333	7376960.9063686	2005310.28821405	74733.502007105	720
SC	MIP1	51.6666666666667	2075506.20388015	910497.137966969	49671.6911282653	336
SC	SOD2	51.6666666666667	5977237.97936751	1537807.60264016	118999.125009058	167
SC	wt	51.6666666666667	7428416.46101579	2031477.94311753	75708.7129267043	720
SC	MIP1	52	2084083.32864466	917379.651530642	50047.1630256117	336
SC	SOD2	52	6019501.09305831	1559893.83484562	120708.20896903	167
SC	wt	52	7478370.24812029	2054488.53540441	76566.267069304	720
SC	MIP1	52.3333333333333	2092543.16788539	924073.751896085	50412.3561403054	336
SC	SOD2	52.3333333333333	6060618.62747788	1581094.76907011	122348.786514465	167
SC	wt	52.3333333333333	7528665.45136782	2078089.89685155	77445.8378785933	720
SC	MIP1	52.6666666666667	2100915.36936555	930749.737958866	50776.5610387716	336
SC	SOD2	52.6666666666667	6099951.50416569	1598891.95100044	123725.973799597	167
SC	wt	52.6666666666667	7578968.61023032	2101109.61889736	78303.7322672197	720
SC	MIP1	53	2103700.10329149	933170.020048837	50908.598251634	336
SC	SOD2	53	6114901.09593493	1606921.6446247	124347.330147256	167
SC	wt	53	7600440.8942578	2114445.22121011	78800.7208220896	720
SC	MIP1	53.3333333333333	2105312.49364879	934770.514519819	50995.912383332	336
SC	SOD2	53.3333333333333	6124707.94219904	1612949.14526574	124813.752150271	167
SC	wt	53.3333333333333	7615171.35046862	2125502.89566701	79212.816018068	720
SC	MIP1	53.6666666666667	2106981.77009552	936575.613312902	51094.3885959055	336
SC	SOD2	53.6666666666667	6136139.31483194	1619026.92264496	125284.064684092	167
SC	wt	53.6666666666667	7631122.97163597	2136804.72574736	79634.0103568982	720
SC	MIP1	54	2111087.24032594	941138.604496554	51343.320173221	336
SC	SOD2	54	6162072.94339484	1633367.02288304	126393.734956201	167
SC	wt	54	7661711.17282985	2155567.53556385	80333.258993541	720
SC	MIP1	54.3333333333333	2118608.08263016	947995.770373701	51717.4092408983	336
SC	SOD2	54.3333333333333	6202256.63286214	1653755.94612654	127971.477205419	167
SC	wt	54.3333333333333	7709573.79742154	2181505.40518815	81299.9063213986	720
SC	MIP1	54.6666666666667	2125463.37390273	954001.852477515	52045.0678822179	336
SC	SOD2	54.6666666666667	6236803.87251596	1671604.27054975	129352.622015468	167
SC	wt	54.6666666666667	7750533.50300551	2202572.68193421	82085.0373698152	720
SC	MIP1	55	2131749.70052716	960026.708531006	52373.75072646	336
SC	SOD2	55	6270395.44001171	1689726.36737933	130754.951970364	167
SC	wt	55	7790197.10229353	2223516.56808351	82865.5699221961	720
SC	MIP1	55.3333333333333	2137294.08862153	966019.782629927	52700.6997229336	336
SC	SOD2	55.3333333333333	6301641.23193062	1707406.50900088	132123.082404489	167
SC	wt	55.3333333333333	7827932.36355011	2243674.0558378	83616.7951367663	720
SC	MIP1	55.6666666666667	2139775.65493676	968606.105418097	52841.7951985096	336
SC	SOD2	55.6666666666667	6315781.96539135	1715243.76579341	132729.547543028	167
SC	wt	55.6666666666667	7847933.86015928	2256323.81065661	84088.223664659	720
SC	MIP1	56	2141191.7382642	971037.76132323	52974.4529038591	336
SC	SOD2	56	6328174.7735716	1722852.80593849	133318.352747183	167
SC	wt	56	7865273.28599227	2269616.36774278	84583.6080186502	720
SC	MIP1	56.3333333333333	2143274.35227636	974016.403972602	53136.9511825373	336
SC	SOD2	56.3333333333333	6343226.94858922	1730264.35622617	133891.875727353	167
SC	wt	56.3333333333333	7887100.60212018	2285854.45538109	85188.7658150479	720
SC	MIP1	56.6666666666667	2146186.46100461	977151.489881648	53307.9841407325	336
SC	SOD2	56.6666666666667	6359376.17535673	1737597.76773862	134459.35214756	167
SC	wt	56.6666666666667	7910128.775567	2301559.00723426	85774.0399067124	720
SC	MIP1	57	2149903.55221107	980888.14823361	53511.8355662569	336
SC	SOD2	57	6379092.17650582	1748156.02103659	135276.374317255	167
SC	wt	57	7936821.74476183	2320236.49141119	86470.1086445173	720
SC	MIP1	57.3333333333333	2153929.91328175	985104.529273235	53741.8580099814	336
SC	SOD2	57.3333333333333	6400124.94997349	1760951.96370671	136266.554089286	167
SC	wt	57.3333333333333	7961825.82595061	2335243.11927992	87029.372644976	720
SC	MIP1	57.6666666666667	2158249.35066843	989427.9947995	53977.7223913938	336
SC	SOD2	57.6666666666667	6421887.05612706	1774558.07904079	137319.426904291	167
SC	wt	57.6666666666667	7987471.44012005	2349687.47547586	87567.6820173984	720
SC	MIP1	58	2161796.6155303	993178.820050568	54182.3466846268	336
SC	SOD2	58	6441181.33806381	1787703.19204892	138336.626288289	167
SC	wt	58	8009702.19618253	2362646.70960521	88050.6441582242	720
SC	MIP1	58.3333333333333	2165100.21979502	996775.546216981	54378.5641835746	336
SC	SOD2	58.3333333333333	6459827.78374254	1799876.04355205	139278.58981822	167
SC	wt	58.3333333333333	8032281.84032846	2376725.19928752	88575.3184907273	720
SC	MIP1	58.6666666666667	2167762.88236137	999361.679797718	54519.6493370389	336
SC	SOD2	58.6666666666667	6473856.06725953	1808256.51189773	139927.08992876	167
SC	wt	58.6666666666667	8050532.72934841	2388669.25632129	89020.4472149713	720
SC	MIP1	59	2170577.23506448	1001852.27126347	54655.5222408129	336
SC	SOD2	59	6487577.34291313	1814398.77191272	140402.392278747	167
SC	wt	59	8070354.56775186	2401773.25659625	89508.8044715042	720
SC	MIP1	59.3333333333333	2173011.36817495	1004650.23758704	54808.1638178333	336
SC	SOD2	59.3333333333333	6502313.07172117	1821611.51246043	140960.530899353	167
SC	wt	59.3333333333333	8090542.19173788	2416424.58857319	90054.8273758601	720
SC	MIP1	59.6666666666667	2175938.14373222	1007703.66347655	54974.7418567334	336
SC	SOD2	59.6666666666667	6518943.09255529	1830534.86370557	141651.040549908	167
SC	wt	59.6666666666667	8113100.97566082	2432011.74051096	90635.7262310014	720
SC	MIP1	60	2178905.09121938	1010581.1781333	55131.7231511129	336
SC	SOD2	60	6536242.16606859	1840650.20740432	142433.789345824	167
SC	wt	60	8135108.42811481	2446735.79965803	91184.4595169611	720
SC	MIP1	60.3333333333333	2182435.34591158	1014555.30082346	55348.5293183594	336
SC	SOD2	60.3333333333333	6557271.94133366	1855996.0821496	143621.28878597	167
SC	wt	60.3333333333333	8158974.78737707	2461068.06235949	91718.5914114918	720
SC	MIP1	60.6666666666667	2185443.41118718	1018381.67253642	55557.2750089748	336
SC	SOD2	60.6666666666667	6576265.22479933	1870772.31177312	144764.707763164	167
SC	wt	60.6666666666667	8180593.40548278	2474238.36564876	92209.4196354767	720
SC	MIP1	61	2188248.25069657	1021512.33299018	55728.0665387907	336
SC	SOD2	61	6591822.74934276	1884199.14251762	145803.707120103	167
SC	wt	61	8198328.48043181	2484530.80951186	92592.9963710183	720
SC	MIP1	61.3333333333333	2189595.09949401	1023750.1334127	55850.1485605336	336
SC	SOD2	61.3333333333333	6602007.44701628	1895743.92771453	146697.069420102	167
SC	wt	61.3333333333333	8208484.72334101	2491853.89388812	92865.9116121899	720
SC	MIP1	61.6666666666667	2190133.07783131	1025821.04323228	55963.1259534584	336
SC	SOD2	61.6666666666667	6609776.10458985	1905914.57327199	147484.097602325	167
SC	wt	61.6666666666667	8216797.75627047	2498853.3647063	93126.7664881227	720
SC	MIP1	62	2190561.84090189	1027006.16416617	56027.7796009253	336
SC	SOD2	62	6615761.74513167	1911366.31246633	147905.965846955	167
SC	wt	62	8225245.50674678	2505911.8271754	93389.8198530817	720
SC	MIP1	62.3333333333333	2192206.09924569	1029402.28006796	56158.4984401376	336
SC	SOD2	62.3333333333333	6629163.32011294	1921654.12214389	148702.060460993	167
SC	wt	62.3333333333333	8242343.50296018	2519088.32224674	93880.8788311602	720
SC	MIP1	62.6666666666667	2196136.33128503	1034192.58515776	56419.8310077085	336
SC	SOD2	62.6666666666667	6654372.35186717	1937759.89801204	149948.36281547	167
SC	wt	62.6666666666667	8273211.24420848	2540009.91340314	94660.5804982128	720
SC	MIP1	63	2200961.50391409	1039323.88819714	56699.7665385623	336
SC	SOD2	63	6680498.34316925	1953195.42418636	151142.799691477	167
SC	wt	63	8304297.27714729	2558626.35861629	95354.3744481464	720
SC	MIP1	63.3333333333333	2205880.65473054	1044262.22312221	56969.1747957189	336
SC	SOD2	63.3333333333333	6705615.26927994	1967576.05503095	152255.606316082	167
SC	wt	63.3333333333333	8334104.00728625	2575938.01910568	95999.541942441	720
SC	MIP1	63.6666666666667	2210302.26483463	1049106.6840478	57233.4618063473	336
SC	SOD2	63.6666666666667	6729087.27273011	1980990.20910339	153293.624722686	167
SC	wt	63.6666666666667	8362490.52548227	2593424.54654068	96651.2263430254	720
SC	MIP1	64	2213040.2193962	1052160.32874018	57400.0517819225	336
SC	SOD2	64	6743197.76523354	1988549.24112005	153878.560181682	167
SC	wt	64	8380225.28216761	2603973.09067642	97044.3473722117	720
SC	MIP1	64.3333333333333	2214992.59674552	1054305.99100673	57517.1072551638	336
SC	SOD2	64.3333333333333	6754190.11159503	1994126.49048205	154310.140694677	167
SC	wt	64.3333333333333	8395433.37944412	2613563.98758212	97401.7789963171	720
SC	MIP1	64.6666666666667	2216265.89940086	1055743.57574646	57595.533932399	336
SC	SOD2	64.6666666666667	6763055.59356216	1997865.02244367	154599.436983425	167
SC	wt	64.6666666666667	8409142.31474177	2623169.51424772	97759.7558393835	720
SC	MIP1	65	2217582.62382348	1057519.11126268	57692.3973359957	336
SC	SOD2	65	6773927.35144029	2003334.51045906	155022.678673062	167
SC	wt	65	8424540.72677848	2635422.71498088	98216.4056690717	720
SC	MIP1	65.3333333333333	2218950.62538283	1059289.54380738	57788.9823496732	336
SC	SOD2	65.3333333333333	6785362.48844363	2009712.16806096	155516.196635212	167
SC	wt	65.3333333333333	8439412.69441463	2647176.54727623	98654.4451358805	720
SC	MIP1	65.6666666666667	2220929.88203743	1061827.99714986	57927.4663328879	336
SC	SOD2	65.6666666666667	6798831.18374372	2017771.53140729	156139.848894895	167
SC	wt	65.6666666666667	8456521.49737531	2659659.63249082	99119.6622543597	720
SC	MIP1	66	2223157.05928283	1064614.40520259	58079.4773545386	336
SC	SOD2	66	6813375.45247267	2027392.91059346	156884.373569222	167
SC	wt	66	8473961.36644986	2671339.09199856	99554.9300110223	720
SC	MIP1	66.3333333333333	2226071.69685683	1067950.87541832	58261.4967273665	336
SC	SOD2	66.3333333333333	6830139.54395359	2040536.33475891	157901.44226665	167
SC	wt	66.3333333333333	8492430.03205624	2682382.51732824	99966.4941733824	720
SC	MIP1	66.6666666666667	2229516.60774925	1071234.82842907	58440.6510517767	336
SC	SOD2	66.6666666666667	6847444.05119456	2053032.97253844	158868.461130886	167
SC	wt	66.6666666666667	8512437.22494508	2692426.23344574	100340.80137314	720
SC	MIP1	67	2232758.11164233	1074275.65675717	58606.5418373586	336
SC	SOD2	67	6863242.38482014	2065333.14095181	159820.276739121	167
SC	wt	67	8531103.93485136	2702075.51412945	100700.408832186	720
SC	MIP1	67.3333333333333	2235907.9682162	1076662.02526741	58736.7289127665	336
SC	SOD2	67.3333333333333	6878478.6534603	2076229.67554812	160663.475901595	167
SC	wt	67.3333333333333	8549367.75444052	2711525.61151924	101052.593168145	720
SC	MIP1	67.6666666666667	2237944.81475762	1078352.91396902	58828.9744540384	336
SC	SOD2	67.6666666666667	6889771.67836181	2084567.33217871	161308.663142159	167
SC	wt	67.6666666666667	8563711.23606094	2720452.59852612	101385.282331172	720
SC	MIP1	68	2239838.49168271	1080512.36897856	58946.7823830989	336
SC	SOD2	68	6901936.89701696	2090741.74870141	161786.45383742	167
SC	wt	68	8581123.48758922	2733210.7379345	101860.750114232	720
SC	MIP1	68.3333333333333	2240736.15019015	1082272.82506534	59042.8231363765	336
SC	SOD2	68.3333333333333	6911786.77836065	2097634.32779223	162319.817620675	167
SC	wt	68.3333333333333	8594693.64677771	2744817.60517271	102293.312516739	720
SC	MIP1	68.6666666666667	2242526.56428461	1084353.12120827	59156.3125952204	336
SC	SOD2	68.6666666666667	6923929.59258552	2105078.25130575	162895.845716272	167
SC	wt	68.6666666666667	8610834.39052331	2757546.2823848	102767.682308571	720
SC	MIP1	69	2244156.28425915	1086431.63301762	59269.7047106873	336
SC	SOD2	69	6935839.88817788	2113860.59313273	163575.44373045	167
SC	wt	69	8625640.11660999	2769698.56405024	103220.571106665	720
SC	MIP1	69.3333333333333	2245887.59158817	1088532.8846532	59384.3373853798	336
SC	SOD2	69.3333333333333	6947234.74625656	2122321.47644351	164230.166537814	167
SC	wt	69.3333333333333	8639547.12678772	2780756.96081547	103632.693221485	720
SC	MIP1	69.6666666666667	2247173.22323172	1089458.29132314	59434.8224581612	336
SC	SOD2	69.6666666666667	6954288.39134724	2128521.38576664	164709.929925198	167
SC	wt	69.6666666666667	8647222.15202466	2786396.15488593	103842.85357615	720
SC	MIP1	70	2248115.15199091	1089845.76275163	59455.9607575743	336
SC	SOD2	70	6957192.50061954	2130111.73601462	164832.994922174	167
SC	wt	70	8650758.61849358	2788365.61193442	103916.250906803	720
SC + 180 mM VitC	MIP1	0	11532.4069881762	6939.58227670131	378.585250885211	336
SC + 180 mM VitC	SOD2	0	15908.4863085741	9729.05967405627	752.857240649574	167
SC + 180 mM VitC	wt	0	21167.3325029063	12091.124758196	450.609614729282	720
SC + 180 mM VitC	MIP1	0.333333333333333	11537.7821704483	6945.9192482324	378.930961024711	336
SC + 180 mM VitC	SOD2	0.333333333333333	15903.6231079943	9726.63810283713	752.669853842713	167
SC + 180 mM VitC	wt	0.333333333333333	21137.3699968097	12091.1362170486	450.610041775506	720
SC + 180 mM VitC	MIP1	0.666666666666667	11541.0190716918	6955.81435347481	379.470783272127	336
SC + 180 mM VitC	SOD2	0.666666666666667	15889.9161185367	9719.76478000345	752.137980153372	167
SC + 180 mM VitC	wt	0.666666666666667	21049.0925327062	12110.0409888386	451.31458102253	720
SC + 180 mM VitC	MIP1	1	11613.5625448228	7005.49837243873	382.181268721314	336
SC + 180 mM VitC	SOD2	1	15898.5333784471	9742.10013145749	753.866341539568	167
SC + 180 mM VitC	wt	1	20928.6888826773	12115.7970488394	451.52909671327	720
SC + 180 mM VitC	MIP1	1.33333333333333	11731.5109538159	7088.23082759987	386.694694176141	336
SC + 180 mM VitC	SOD2	1.33333333333333	15938.3216195827	9773.46650045802	756.293544044853	167
SC + 180 mM VitC	wt	1.33333333333333	20849.3581289979	12174.2127020961	453.706119573804	720
SC + 180 mM VitC	MIP1	1.66666666666667	11912.153641058	7215.07014480977	393.614346226271	336
SC + 180 mM VitC	SOD2	1.66666666666667	16021.9444545796	9855.56079043731	762.646190929289	167
SC + 180 mM VitC	wt	1.66666666666667	20822.0241185902	12249.2293220934	456.50182393641	720
SC + 180 mM VitC	MIP1	2	12156.1519357895	7381.00571129667	402.666873534742	336
SC + 180 mM VitC	SOD2	2	16171.5581714485	9990.18612080971	773.063811762264	167
SC + 180 mM VitC	wt	2	20904.8069992832	12384.8081786878	461.554549597356	720
SC + 180 mM VitC	MIP1	2.33333333333333	12505.2268371797	7607.78918364411	415.038926253755	336
SC + 180 mM VitC	SOD2	2.33333333333333	16424.5972581723	10190.1673182378	788.538821426252	167
SC + 180 mM VitC	wt	2.33333333333333	21162.6433877656	12616.7797708008	470.199620410914	720
SC + 180 mM VitC	MIP1	2.66666666666667	12948.6150339095	7903.27324389004	431.158903310063	336
SC + 180 mM VitC	SOD2	2.66666666666667	16798.1653380736	10469.3321737462	810.141246516189	167
SC + 180 mM VitC	wt	2.66666666666667	21662.6534765016	12989.4234766953	484.087231373705	720
SC + 180 mM VitC	MIP1	3	13536.2960076864	8295.57160480897	452.560533475755	336
SC + 180 mM VitC	SOD2	3	17340.586950058	10851.2147990217	839.692211270123	167
SC + 180 mM VitC	wt	3	22443.765851187	13515.9289663355	503.708932463077	720
SC + 180 mM VitC	MIP1	3.33333333333333	14282.7462060308	8789.79597884226	479.522683526942	336
SC + 180 mM VitC	SOD2	3.33333333333333	18103.8915603012	11363.9930826245	879.372186169206	167
SC + 180 mM VitC	wt	3.33333333333333	23574.9321913839	14244.98253409	530.879154742042	720
SC + 180 mM VitC	MIP1	3.66666666666667	15222.0653532906	9404.22880080258	513.042742051924	336
SC + 180 mM VitC	SOD2	3.66666666666667	19130.0474147073	12040.6714733987	931.735132142692	167
SC + 180 mM VitC	wt	3.66666666666667	25112.0031457483	15190.6960584864	566.123816871894	720
SC + 180 mM VitC	MIP1	4	16365.5588765814	10161.9966178808	554.382365634811	336
SC + 180 mM VitC	SOD2	4	20486.6301812903	12919.5496121138	999.744764373102	167
SC + 180 mM VitC	wt	4	27155.4714162422	16412.5656346842	611.660207405513	720
SC + 180 mM VitC	MIP1	4.33333333333333	17734.7805987256	11059.8493001709	603.364245152828	336
SC + 180 mM VitC	SOD2	4.33333333333333	22235.1582037202	14034.7265309902	1086.03974519435	167
SC + 180 mM VitC	wt	4.33333333333333	29763.0516425478	17935.1101418631	668.402091019195	720
SC + 180 mM VitC	MIP1	4.66666666666667	19311.7771000805	12093.8137515206	659.771630440964	336
SC + 180 mM VitC	SOD2	4.66666666666667	24386.8083081501	15375.9543953266	1189.82707334891	167
SC + 180 mM VitC	wt	4.66666666666667	32937.4577310205	19758.1311004097	736.342070814481	720
SC + 180 mM VitC	MIP1	5	21189.0301607042	13315.8358328222	726.43840054182	336
SC + 180 mM VitC	SOD2	5	27052.0326569431	17028.2113658161	1317.68255633704	167
SC + 180 mM VitC	wt	5	36824.4814381047	21934.7696546209	817.460600308865	720
SC + 180 mM VitC	MIP1	5.33333333333333	23349.8341508813	14709.3681913292	802.461823354066	336
SC + 180 mM VitC	SOD2	5.33333333333333	30278.8459370208	19003.1507725189	1470.50795591241	167
SC + 180 mM VitC	wt	5.33333333333333	41436.9865134928	24511.641370195	913.494939064203	720
SC + 180 mM VitC	MIP1	5.66666666666667	25881.9578067939	16315.5567157577	890.08659113458	336
SC + 180 mM VitC	SOD2	5.66666666666667	34188.8539513859	21368.603965978	1653.55221956949	167
SC + 180 mM VitC	wt	5.66666666666667	46942.6719695605	27547.3810223063	1026.63027613274	720
SC + 180 mM VitC	MIP1	6	28605.7928098326	18031.4400825131	983.695703180681	336
SC + 180 mM VitC	SOD2	6	38560.4062159452	23993.0258283996	1856.63608048072	167
SC + 180 mM VitC	wt	6	52998.3928277409	30846.149420699	1149.56811581331	720
SC + 180 mM VitC	MIP1	6.33333333333333	31689.3483506134	19963.5304700783	1089.09987521061	336
SC + 180 mM VitC	SOD2	6.33333333333333	43677.8791038227	27028.7198131159	2091.54513370448	167
SC + 180 mM VitC	wt	6.33333333333333	59998.3926236611	34608.4023004728	1289.77900227529	720
SC + 180 mM VitC	MIP1	6.66666666666667	35072.5192104877	22064.5944858114	1203.72231440162	336
SC + 180 mM VitC	SOD2	6.66666666666667	49466.7619794491	30408.0173106509	2353.04302502818	167
SC + 180 mM VitC	wt	6.66666666666667	67858.391618358	38796.2609721267	1445.85128010829	720
SC + 180 mM VitC	MIP1	7	38814.9710710961	24377.3759538719	1329.89488753589	336
SC + 180 mM VitC	SOD2	7	56033.637745919	34207.5285507112	2647.05803201151	167
SC + 180 mM VitC	wt	7	76701.8566213848	43425.275083443	1618.36445047011	720
SC + 180 mM VitC	MIP1	7.33333333333333	42828.2259914003	26844.1920555577	1464.4707388634	336
SC + 180 mM VitC	SOD2	7.33333333333333	63294.5994289184	38381.9655704269	2970.08566687217	167
SC + 180 mM VitC	wt	7.33333333333333	86406.4463604482	48433.1549342911	1804.99711329757	720
SC + 180 mM VitC	MIP1	7.66666666666667	47359.9451371211	29600.5216484644	1614.84084600318	336
SC + 180 mM VitC	SOD2	7.66666666666667	71539.577631026	43068.3484539418	3332.72886205359	167
SC + 180 mM VitC	wt	7.66666666666667	97424.7866734878	54051.9374191891	2014.39677308119	720
SC + 180 mM VitC	MIP1	8	52225.0195961863	32534.3230952161	1774.89283652354	336
SC + 180 mM VitC	SOD2	8	80509.0419946165	48144.6393483193	3725.54404497066	167
SC + 180 mM VitC	wt	8	109358.315957402	60080.6406955758	2239.07327878413	720
SC + 180 mM VitC	MIP1	8.33333333333333	57718.6513016409	35837.9662984782	1955.12134900063	336
SC + 180 mM VitC	SOD2	8.33333333333333	90623.2474708324	53820.0513285092	4164.72060941801	167
SC + 180 mM VitC	wt	8.33333333333333	122729.242614068	66746.2392541928	2487.48547024733	720
SC + 180 mM VitC	MIP1	8.66666666666667	63678.1520093013	39396.6058498302	2149.26105275223	336
SC + 180 mM VitC	SOD2	8.66666666666667	101634.890317171	59956.0052354573	4639.53497811352	167
SC + 180 mM VitC	wt	8.66666666666667	137198.540907383	73864.8138215005	2752.77908083735	720
SC + 180 mM VitC	MIP1	9	70272.7646742404	43312.8520141429	2362.90979665751	336
SC + 180 mM VitC	SOD2	9	113858.698475779	66683.7746482202	5160.14540558637	167
SC + 180 mM VitC	wt	9	153216.66690325	81639.1923993113	3042.51306388407	720
SC + 180 mM VitC	MIP1	9.33333333333333	77485.7976570184	47565.4246476404	2594.90665369679	336
SC + 180 mM VitC	SOD2	9.33333333333333	127371.259516319	74070.0989140049	5731.71633757586	167
SC + 180 mM VitC	wt	9.33333333333333	170706.756173217	90026.6604403109	3355.09554219711	720
SC + 180 mM VitC	MIP1	9.66666666666667	85324.5253627327	52155.5228359237	2845.3170393526	336
SC + 180 mM VitC	SOD2	9.66666666666667	142195.783496565	82082.1717027375	6351.70914404344	167
SC + 180 mM VitC	wt	9.66666666666667	189781.587006761	99017.669554041	3690.17066827412	720
SC + 180 mM VitC	MIP1	10	93746.3525835114	57031.2937633552	3111.31215061712	336
SC + 180 mM VitC	SOD2	10	158408.807741357	90741.2559694033	7021.76920184512	167
SC + 180 mM VitC	wt	10	210528.414403369	108667.949038385	4049.81535042185	720
SC + 180 mM VitC	MIP1	10.3333333333333	102830.564893142	62271.5077408486	3397.18926025556	336
SC + 180 mM VitC	SOD2	10.3333333333333	176082.58906476	100072.021669343	7743.80552943973	167
SC + 180 mM VitC	wt	10.3333333333333	233194.802401576	119092.456192917	4438.31379424631	720
SC + 180 mM VitC	MIP1	10.6666666666667	112583.438112091	67856.1612417194	3701.85708642033	336
SC + 180 mM VitC	SOD2	10.6666666666667	195139.53156176	110036.291602026	8514.86388635483	167
SC + 180 mM VitC	wt	10.6666666666667	257448.555783759	130076.706914122	4847.67264915491	720
SC + 180 mM VitC	MIP1	11	123218.125707848	73903.7754307249	4031.78148874184	336
SC + 180 mM VitC	SOD2	11	215964.481624413	120797.968856335	9347.62747439672	167
SC + 180 mM VitC	wt	11	283929.247089392	141860.878959166	5286.84281167608	720
SC + 180 mM VitC	MIP1	11.3333333333333	134757.948969043	80411.8809730295	4386.82775396056	336
SC + 180 mM VitC	SOD2	11.3333333333333	238673.62093417	132453.37354586	10249.5497677309	167
SC + 180 mM VitC	wt	11.3333333333333	312621.065107425	154464.921716708	5756.56775162904	720
SC + 180 mM VitC	MIP1	11.6666666666667	147076.456768622	87311.4687313879	4763.23112499232	336
SC + 180 mM VitC	SOD2	11.6666666666667	263013.842368095	144792.535749948	11204.382806084	167
SC + 180 mM VitC	wt	11.6666666666667	343252.259958687	167683.154375724	6249.18219776184	720
SC + 180 mM VitC	MIP1	12	160521.175171457	94779.4912403367	5170.64515402675	336
SC + 180 mM VitC	SOD2	12	289704.008773973	158175.957790512	12240.0230966637	167
SC + 180 mM VitC	wt	12	376551.95581381	181799.237262645	6775.25754628146	720
SC + 180 mM VitC	MIP1	12.3333333333333	174902.726658801	102717.044597386	5603.67419082946	336
SC + 180 mM VitC	SOD2	12.3333333333333	318579.034297936	172444.795521049	13344.1789103786	167
SC + 180 mM VitC	wt	12.3333333333333	412524.523330653	196786.100340805	7333.78495648559	720
SC + 180 mM VitC	MIP1	12.6666666666667	189938.293311367	110946.220491831	6052.61254134615	336
SC + 180 mM VitC	SOD2	12.6666666666667	349115.844129731	187354.369562624	14497.9163884345	167
SC + 180 mM VitC	wt	12.6666666666667	450309.24995254	212283.950325811	7911.35572434504	720
SC + 180 mM VitC	MIP1	13	206039.714151392	119686.265563288	6529.42109036134	336
SC + 180 mM VitC	SOD2	13	381924.276998589	203108.275209569	15716.9902077102	167
SC + 180 mM VitC	wt	13	490877.289830717	228589.97853728	8519.0455164096	720
SC + 180 mM VitC	MIP1	13.3333333333333	223206.844600597	128945.266530256	7034.54100453753	336
SC + 180 mM VitC	SOD2	13.3333333333333	416940.588452947	219742.547449011	17004.188839228	167
SC + 180 mM VitC	wt	13.3333333333333	534043.205597973	245626.020575148	9153.94131747987	720
SC + 180 mM VitC	MIP1	13.6666666666667	241500.172089199	138703.370519758	7566.8892208607	336
SC + 180 mM VitC	SOD2	13.6666666666667	454296.395728898	237194.257150612	18354.642680682	167
SC + 180 mM VitC	wt	13.6666666666667	579995.77154791	263425.324618174	9817.28221401977	720
SC + 180 mM VitC	MIP1	14	260982.749217491	149000.665540165	8128.65271948338	336
SC + 180 mM VitC	SOD2	14	494124.567020901	255626.320970727	19780.9586014377	167
SC + 180 mM VitC	wt	14	628844.74224375	282018.251561869	10510.1996897996	720
SC + 180 mM VitC	MIP1	14.3333333333333	281742.041073717	159858.41125184	8720.99130996356	336
SC + 180 mM VitC	SOD2	14.3333333333333	536496.252878375	274916.654611093	21273.6894348627	167
SC + 180 mM VitC	wt	14.3333333333333	680733.703231483	301351.618586176	11230.711738138	720
SC + 180 mM VitC	MIP1	14.6666666666667	303551.472631746	171178.338825615	9338.5439881569	336
SC + 180 mM VitC	SOD2	14.6666666666667	581176.346161734	294991.398366286	22827.1197453564	167
SC + 180 mM VitC	wt	14.6666666666667	735047.948464545	321184.419316445	11969.8365817561	720
SC + 180 mM VitC	MIP1	15	326836.425540601	183162.121490954	9992.31293072613	336
SC + 180 mM VitC	SOD2	15	629055.007795662	316191.413152058	24467.6261424862	167
SC + 180 mM VitC	wt	15	792856.273165113	341840.954754615	12739.6602054125	720
SC + 180 mM VitC	MIP1	15.3333333333333	351123.233951112	195608.274110866	10671.3062222942	336
SC + 180 mM VitC	SOD2	15.3333333333333	679220.204640192	338100.037114715	26162.9663640021	167
SC + 180 mM VitC	wt	15.3333333333333	853096.729978252	362799.298166778	13520.7315481689	720
SC + 180 mM VitC	MIP1	15.6666666666667	376382.20863662	208385.794312661	11368.3770975151	336
SC + 180 mM VitC	SOD2	15.6666666666667	731160.52383458	360261.741733097	27877.8905546284	167
SC + 180 mM VitC	wt	15.6666666666667	915037.944442184	383739.02487976	14301.1090875104	720
SC + 180 mM VitC	MIP1	16	403464.999632842	222026.259563735	12112.5254847467	336
SC + 180 mM VitC	SOD2	16	786658.033294986	383537.065747448	29678.9892013348	167
SC + 180 mM VitC	wt	16	980980.027164795	405623.311048794	15116.6882793941	720
SC + 180 mM VitC	MIP1	16.3333333333333	431513.076252188	235971.892031604	12873.322108533	336
SC + 180 mM VitC	SOD2	16.3333333333333	843903.204416021	407070.518132892	31500.062421094	167
SC + 180 mM VitC	wt	16.3333333333333	1048815.20887592	427494.333210258	15931.7731509014	720
SC + 180 mM VitC	MIP1	16.6666666666667	460582.045368094	250305.604388993	13655.2902260027	336
SC + 180 mM VitC	SOD2	16.6666666666667	902976.638134639	430857.133204797	33340.7259576927	167
SC + 180 mM VitC	wt	16.6666666666667	1118792.79055057	449540.960015885	16753.4024211006	720
SC + 180 mM VitC	MIP1	17	491178.699151658	265148.818246329	14465.0539290701	336
SC + 180 mM VitC	SOD2	17	964424.297830332	455057.985038484	35213.444097295	167
SC + 180 mM VitC	wt	17	1191130.05927416	471653.674804574	17577.4946450101	720
SC + 180 mM VitC	MIP1	17.3333333333333	523285.681520775	280559.162267585	15305.7571191025	336
SC + 180 mM VitC	SOD2	17.3333333333333	1028713.85409443	479945.173068831	37139.2725263278	167
SC + 180 mM VitC	wt	17.3333333333333	1266482.80076094	494066.913445192	18412.7867316159	720
SC + 180 mM VitC	MIP1	17.6666666666667	556309.750764738	296192.799095426	16158.6419304242	336
SC + 180 mM VitC	SOD2	17.6666666666667	1094472.65025884	504876.039071494	39068.4808583335	167
SC + 180 mM VitC	wt	17.6666666666667	1342984.40486806	515965.864618598	19228.912455944	720
SC + 180 mM VitC	MIP1	18	590584.804416186	312248.471240795	17034.550655895	336
SC + 180 mM VitC	SOD2	18	1162487.34714449	530116.860945695	41021.6742957847	167
SC + 180 mM VitC	wt	18	1421834.71434186	537971.219444961	20049.0036102898	720
SC + 180 mM VitC	MIP1	18.3333333333333	625814.389968631	328513.296074213	17921.8695959466	336
SC + 180 mM VitC	SOD2	18.3333333333333	1231914.59653559	555252.811740587	42966.752565477	167
SC + 180 mM VitC	wt	18.3333333333333	1501668.1142598	559175.612517354	20839.2446824814	720
SC + 180 mM VitC	MIP1	18.6666666666667	662229.730109751	345123.997350286	18828.0576428979	336
SC + 180 mM VitC	SOD2	18.6666666666667	1303761.16984738	580715.127331306	44937.0857012984	167
SC + 180 mM VitC	wt	18.6666666666667	1583897.08487787	580542.549186974	21635.5433968848	720
SC + 180 mM VitC	MIP1	19	699980.977049358	362144.296112906	19756.5910646892	336
SC + 180 mM VitC	SOD2	19	1377710.95468795	606259.143802991	46913.7410411009	167
SC + 180 mM VitC	wt	19	1668389.5437543	601791.736755911	22427.4538613979	720
SC + 180 mM VitC	MIP1	19.3333333333333	738029.279720712	379037.509032611	20678.1913853506	336
SC + 180 mM VitC	SOD2	19.3333333333333	1452180.31321729	631164.506556088	48840.9758724046	167
SC + 180 mM VitC	wt	19.3333333333333	1753472.09007	622358.73387131	23193.9405887825	720
SC + 180 mM VitC	MIP1	19.6666666666667	776882.602353293	395958.334729924	21601.2981065302	336
SC + 180 mM VitC	SOD2	19.6666666666667	1527521.38885096	655433.252814499	50718.947840328	167
SC + 180 mM VitC	wt	19.6666666666667	1838988.24049947	642289.771626476	23936.7265101603	720
SC + 180 mM VitC	MIP1	20	815972.702991852	412698.037681965	22514.5237718731	336
SC + 180 mM VitC	SOD2	20	1603957.73158867	679502.270550101	52581.4643511365	167
SC + 180 mM VitC	wt	20	1925872.01081147	662216.79838483	24679.3629505126	720
SC + 180 mM VitC	MIP1	20.3333333333333	854424.004675786	428873.073257792	23396.9443063354	336
SC + 180 mM VitC	SOD2	20.3333333333333	1678511.16905371	701946.576760633	54318.2569095184	167
SC + 180 mM VitC	wt	20.3333333333333	2010615.4837087	680466.071242356	25359.4731946687	720
SC + 180 mM VitC	MIP1	20.6666666666667	893461.784233093	445163.757795721	24285.6740089271	336
SC + 180 mM VitC	SOD2	20.6666666666667	1754617.19843667	724368.978390246	56053.354440539	167
SC + 180 mM VitC	wt	20.6666666666667	2097054.72290455	698472.677308439	26030.5397814657	720
SC + 180 mM VitC	MIP1	21	934321.407361376	461970.140679389	25202.5373627702	336
SC + 180 mM VitC	SOD2	21	1833267.38505634	746748.055772017	57785.0994406084	167
SC + 180 mM VitC	wt	21	2185472.20083899	716077.737021301	26686.6416192308	720
SC + 180 mM VitC	MIP1	21.3333333333333	975491.347152655	478789.670771572	26120.1179556394	336
SC + 180 mM VitC	SOD2	21.3333333333333	1913276.76702257	769004.179550623	59507.3300052125	167
SC + 180 mM VitC	wt	21.3333333333333	2275231.15466485	733144.371724652	27322.6775416283	720
SC + 180 mM VitC	MIP1	21.6666666666667	1016582.4317359	495345.690134259	27023.3228596474	336
SC + 180 mM VitC	SOD2	21.6666666666667	1993381.40119174	790122.992755182	61141.5528353361	167
SC + 180 mM VitC	wt	21.6666666666667	2364190.1452218	749129.045936222	27918.3911772159	720
SC + 180 mM VitC	MIP1	22	1057961.35850318	511956.130736503	27929.4966856754	336
SC + 180 mM VitC	SOD2	22	2075027.90185461	811102.513007121	62764.9968531732	167
SC + 180 mM VitC	wt	22	2454725.25484572	764925.370839988	28507.0854485408	720
SC + 180 mM VitC	MIP1	22.3333333333333	1099488.1270785	528210.832594621	28816.2633721488	336
SC + 180 mM VitC	SOD2	22.3333333333333	2157016.42285016	831166.266597532	64317.5767191832	167
SC + 180 mM VitC	wt	22.3333333333333	2545096.73068291	780071.307790047	29071.5411919284	720
SC + 180 mM VitC	MIP1	22.6666666666667	1139947.09779041	543915.030299923	29672.9975949238	336
SC + 180 mM VitC	SOD2	22.6666666666667	2237506.45303763	849794.476757631	65759.0708994246	167
SC + 180 mM VitC	wt	22.6666666666667	2634302.26439309	794650.846495535	29614.8885190295	720
SC + 180 mM VitC	MIP1	23	1180375.56583863	559443.948146768	30520.1695174704	336
SC + 180 mM VitC	SOD2	23	2317902.30659602	867769.314406836	67150.005596823	167
SC + 180 mM VitC	wt	23	2723777.69009388	808868.006400811	30144.7307856158	720
SC + 180 mM VitC	MIP1	23.3333333333333	1223151.0158076	575695.37184596	31406.7573657126	336
SC + 180 mM VitC	SOD2	23.3333333333333	2400745.76544142	885401.562217128	68514.4298965633	167
SC + 180 mM VitC	wt	23.3333333333333	2815838.02808608	822849.558014339	30665.7924495953	720
SC + 180 mM VitC	MIP1	23.6666666666667	1269992.8156107	593533.858938699	32379.9266203075	336
SC + 180 mM VitC	SOD2	23.6666666666667	2491640.56340281	904679.906418507	70006.2329593449	167
SC + 180 mM VitC	wt	23.6666666666667	2917176.29659115	838966.932947441	31266.4515490831	720
SC + 180 mM VitC	MIP1	24	1311708.32695149	609197.275302132	33234.4360384866	336
SC + 180 mM VitC	SOD2	24	2573010.75393941	920209.43268082	71207.9437805476	167
SC + 180 mM VitC	wt	24	3007066.0953104	851564.648759908	31735.9406977148	720
SC + 180 mM VitC	MIP1	24.3333333333333	1353346.73911544	624444.886020078	34066.261398989	336
SC + 180 mM VitC	SOD2	24.3333333333333	2654594.05437317	934999.515020647	72352.4347131127	167
SC + 180 mM VitC	wt	24.3333333333333	3095805.85452829	863126.227764266	32166.8153073977	720
SC + 180 mM VitC	MIP1	24.6666666666667	1394362.09391959	639292.862512939	34876.2849251255	336
SC + 180 mM VitC	SOD2	24.6666666666667	2735396.78106822	948661.650161162	73409.6424708879	167
SC + 180 mM VitC	wt	24.6666666666667	3182846.66996041	873878.90695781	32567.5440010146	720
SC + 180 mM VitC	MIP1	25	1432956.54693482	653144.672684598	35631.9631230277	336
SC + 180 mM VitC	SOD2	25	2813404.1299663	961482.942689544	74401.7838738457	167
SC + 180 mM VitC	wt	25	3266926.36893082	884110.879937516	32948.8671197907	720
SC + 180 mM VitC	MIP1	25.3333333333333	1468037.61816329	665272.024517603	36293.5644058147	336
SC + 180 mM VitC	SOD2	25.3333333333333	2884558.07679307	971533.626686019	75179.5291517789	167
SC + 180 mM VitC	wt	25.3333333333333	3342623.83823617	891734.863314644	33232.9962046338	720
SC + 180 mM VitC	MIP1	25.6666666666667	1506558.10252157	678736.58874227	37028.1166053281	336
SC + 180 mM VitC	SOD2	25.6666666666667	2961815.61176249	982848.613781154	76055.1091407828	167
SC + 180 mM VitC	wt	25.6666666666667	3426001.41056557	901260.305153895	33587.9884624386	720
SC + 180 mM VitC	MIP1	26	1544022.89430386	691895.984017895	37746.0204737853	336
SC + 180 mM VitC	SOD2	26	3037396.38147276	993570.410345376	76884.7866683728	167
SC + 180 mM VitC	wt	26	3508842.61812932	911195.102543584	33958.2365008724	720
SC + 180 mM VitC	MIP1	26.3333333333333	1581651.67216342	704922.778262958	38456.6903629592	336
SC + 180 mM VitC	SOD2	26.3333333333333	3112526.72335863	1003530.62247581	77655.5310231222	167
SC + 180 mM VitC	wt	26.3333333333333	3591536.98936509	921038.516091265	34325.0788645934	720
SC + 180 mM VitC	MIP1	26.6666666666667	1617830.80478504	717438.089596272	39139.4565716599	336
SC + 180 mM VitC	SOD2	26.6666666666667	3186248.70861584	1012983.58076971	78387.0228975219	167
SC + 180 mM VitC	wt	26.6666666666667	3673073.45423079	930985.14178614	34695.7677179348	720
SC + 180 mM VitC	MIP1	27	1654062.59196301	729982.469323232	39823.808591244	336
SC + 180 mM VitC	SOD2	27	3260101.90250738	1022658.09661524	79135.6594100011	167
SC + 180 mM VitC	wt	27	3754493.73844275	941384.548250829	35083.3307142797	720
SC + 180 mM VitC	MIP1	27.3333333333333	1689881.47525445	742225.255431513	40491.7073300338	336
SC + 180 mM VitC	SOD2	27.3333333333333	3333894.60098331	1032074.34250204	79864.3103930471	167
SC + 180 mM VitC	wt	27.3333333333333	3834927.71033441	951412.945545849	35457.0670152304	720
SC + 180 mM VitC	MIP1	27.6666666666667	1724754.23245515	754009.167651598	41134.5724458821	336
SC + 180 mM VitC	SOD2	27.6666666666667	3407016.69042872	1041305.69958796	80578.6542511378	167
SC + 180 mM VitC	wt	27.6666666666667	3913494.21495814	960997.258347284	35814.2532642576	720
SC + 180 mM VitC	MIP1	28	1758624.85404292	765550.199042772	41764.1873262144	336
SC + 180 mM VitC	SOD2	28	3479500.04726991	1050584.57193752	81296.6749507183	167
SC + 180 mM VitC	wt	28	3990958.57317522	970684.043256468	36175.2584232635	720
SC + 180 mM VitC	MIP1	28.3333333333333	1793808.58632521	777363.094245857	42408.6335934134	336
SC + 180 mM VitC	SOD2	28.3333333333333	3553096.29292535	1059399.57281695	81978.8001982493	167
SC + 180 mM VitC	wt	28.3333333333333	4068705.58841303	980079.563424449	36525.4087862564	720
SC + 180 mM VitC	MIP1	28.6666666666667	1827052.78705736	788355.854356293	43008.3378232059	336
SC + 180 mM VitC	SOD2	28.6666666666667	3623634.1827871	1066859.34602889	82556.0547803329	167
SC + 180 mM VitC	wt	28.6666666666667	4143605.72429816	989001.383030043	36857.9053716081	720
SC + 180 mM VitC	MIP1	29	1860269.32007338	799602.243846705	43621.8786700484	336
SC + 180 mM VitC	SOD2	29	3694415.81770928	1074762.4262299	83167.613487145	167
SC + 180 mM VitC	wt	29	4219741.46327686	999402.004674235	37245.5136550192	720
SC + 180 mM VitC	MIP1	29.3333333333333	1892231.42682363	810252.97414831	44202.9236440206	336
SC + 180 mM VitC	SOD2	29.3333333333333	3762532.33160238	1081936.38622169	83722.7511782367	167
SC + 180 mM VitC	wt	29.3333333333333	4293374.31224291	1009789.35748796	37632.6274383152	720
SC + 180 mM VitC	MIP1	29.6666666666667	1922348.41005844	820359.892618128	44754.3012503383	336
SC + 180 mM VitC	SOD2	29.6666666666667	3828694.09946035	1089517.99479295	84309.433663479	167
SC + 180 mM VitC	wt	29.6666666666667	4365826.07473121	1021109.69858128	38054.5116418678	720
SC + 180 mM VitC	MIP1	30	1952124.48638941	830408.593742539	45302.5028400835	336
SC + 180 mM VitC	SOD2	30	3892965.90370057	1096719.67366166	84866.7163056649	167
SC + 180 mM VitC	wt	30	4435689.45855641	1031724.23579621	38450.0920879058	720
SC + 180 mM VitC	MIP1	30.3333333333333	1981481.04367465	840329.633235539	45843.7399168612	336
SC + 180 mM VitC	SOD2	30.3333333333333	3957030.6088209	1104139.74755427	85440.8988621872	167
SC + 180 mM VitC	wt	30.3333333333333	4504635.65032263	1042317.05925795	38844.8633101409	720
SC + 180 mM VitC	MIP1	30.6666666666667	2011312.72168605	850516.323595211	46399.4694365549	336
SC + 180 mM VitC	SOD2	30.6666666666667	4023159.00577511	1112254.19729371	86068.813834948	167
SC + 180 mM VitC	wt	30.6666666666667	4575103.9063969	1053420.15079479	39258.6511007539	720
SC + 180 mM VitC	MIP1	31	2041326.69799493	861194.932479655	46982.0353119095	336
SC + 180 mM VitC	SOD2	31	4090384.84845579	1121480.93176728	86782.7999845551	167
SC + 180 mM VitC	wt	31	4645732.38773527	1065253.35312189	39699.6485140022	720
SC + 180 mM VitC	MIP1	31.3333333333333	2071473.47131374	871692.53493221	47554.7264768428	336
SC + 180 mM VitC	SOD2	31.3333333333333	4156437.51067989	1129470.79955859	87401.0745167344	167
SC + 180 mM VitC	wt	31.3333333333333	4714562.84264938	1075930.75362361	40097.571736416	720
SC + 180 mM VitC	MIP1	31.6666666666667	2099341.0539202	881460.151471499	48087.5936453022	336
SC + 180 mM VitC	SOD2	31.6666666666667	4220252.9324608	1137409.17259634	88015.3642652476	167
SC + 180 mM VitC	wt	31.6666666666667	4782141.16607069	1087791.1541885	40539.5827681409	720
SC + 180 mM VitC	MIP1	32	2128167.36793529	892173.970876259	48672.0804120212	336
SC + 180 mM VitC	SOD2	32	4286764.29765884	1146617.59108621	88727.9330814834	167
SC + 180 mM VitC	wt	32	4853313.59180191	1101451.84917546	41048.6868116528	720
SC + 180 mM VitC	MIP1	32.3333333333333	2152743.04596843	901279.403375664	49168.8224794479	336
SC + 180 mM VitC	SOD2	32.3333333333333	4343988.04731848	1153826.1184992	89285.7456799366	167
SC + 180 mM VitC	wt	32.3333333333333	4915610.45809841	1113964.94435217	41515.0223353872	720
SC + 180 mM VitC	MIP1	32.6666666666667	2180384.0266019	911498.281913142	49726.3080082044	336
SC + 180 mM VitC	SOD2	32.6666666666667	4408566.55554938	1161781.42207059	89901.345552477	167
SC + 180 mM VitC	wt	32.6666666666667	4986905.65190944	1128908.04193109	42071.9187017351	720
SC + 180 mM VitC	MIP1	33	2208125.89223934	922140.74952486	50306.9022154879	336
SC + 180 mM VitC	SOD2	33	4474506.45704359	1170692.34890398	90590.8937731858	167
SC + 180 mM VitC	wt	33	5058727.14211263	1144765.3478033	42662.8855995727	720
SC + 180 mM VitC	MIP1	33.3333333333333	2239613.417154	934592.67758533	50986.2105831694	336
SC + 180 mM VitC	SOD2	33.3333333333333	4551314.85822624	1182488.32594689	91503.6938818105	167
SC + 180 mM VitC	wt	33.3333333333333	5142004.3203233	1164088.03305067	43382.9995615886	720
SC + 180 mM VitC	MIP1	33.6666666666667	2264304.63591644	944465.876150188	51524.8377233455	336
SC + 180 mM VitC	SOD2	33.6666666666667	4613310.67035177	1193447.79122887	92351.762766945	167
SC + 180 mM VitC	wt	33.6666666666667	5208951.02167352	1181034.43063694	44014.5545111991	720
SC + 180 mM VitC	MIP1	34	2285470.25005511	953469.26875394	52016.0130580848	336
SC + 180 mM VitC	SOD2	34	4671119.94971934	1207082.80308281	93406.8716617907	167
SC + 180 mM VitC	wt	34	5272397.76584193	1200591.82112003	44743.415420911	720
SC + 180 mM VitC	MIP1	34.3333333333333	2299187.48022849	960096.477535026	52377.5569376753	336
SC + 180 mM VitC	SOD2	34.3333333333333	4715021.6240357	1220533.92348034	94447.7506085131	167
SC + 180 mM VitC	wt	34.3333333333333	5322324.86784395	1219863.02053368	45461.6106191922	720
SC + 180 mM VitC	MIP1	34.6666666666667	2314372.35884453	967161.065269427	52762.9617953723	336
SC + 180 mM VitC	SOD2	34.6666666666667	4760866.83754997	1234569.53540213	95533.858867304	167
SC + 180 mM VitC	wt	34.6666666666667	5374619.64228894	1239725.39698006	46201.837684672	720
SC + 180 mM VitC	MIP1	35	2328667.27474398	974510.016786584	53163.8799692525	336
SC + 180 mM VitC	SOD2	35	4807377.02684849	1252824.15697791	96946.4438949499	167
SC + 180 mM VitC	wt	35	5430063.07621645	1263742.72810024	47096.9107683861	720
SC + 180 mM VitC	MIP1	35.3333333333333	2352808.73541166	985235.808760269	53749.0198931544	336
SC + 180 mM VitC	SOD2	35.3333333333333	4869846.2347316	1264614.21873439	97858.7862649674	167
SC + 180 mM VitC	wt	35.3333333333333	5497816.08403832	1282531.40591633	47797.1234484548	720
SC + 180 mM VitC	MIP1	35.6666666666667	2386642.0069064	999819.165246507	54544.607214401	336
SC + 180 mM VitC	SOD2	35.6666666666667	4949766.62306673	1274806.15962566	98647.4623295958	167
SC + 180 mM VitC	wt	35.6666666666667	5581985.91156393	1300670.5819405	48473.1306258862	720
SC + 180 mM VitC	MIP1	36	2414766.79555849	1012054.62861952	55212.1064652306	336
SC + 180 mM VitC	SOD2	36	5014908.98617273	1281985.06330491	99202.9825747086	167
SC + 180 mM VitC	wt	36	5649257.65365848	1313386.31065621	48947.0178557489	720
SC + 180 mM VitC	MIP1	36.3333333333333	2441067.88331936	1024334.38286778	55882.0219813987	336
SC + 180 mM VitC	SOD2	36.3333333333333	5079440.71705623	1290155.38749542	99835.2212423035	167
SC + 180 mM VitC	wt	36.3333333333333	5715277.50120226	1327647.2394495	49478.4912924838	720
SC + 180 mM VitC	MIP1	36.6666666666667	2466226.25229763	1035570.78569478	56495.0180110861	336
SC + 180 mM VitC	SOD2	36.6666666666667	5138265.77507541	1292175.09863703	99991.5111827423	167
SC + 180 mM VitC	wt	36.6666666666667	5772167.02631407	1335692.28548791	49778.312456217	720
SC + 180 mM VitC	MIP1	37	2480802.13293293	1043097.91958976	56905.6568306078	336
SC + 180 mM VitC	SOD2	37	5181484.27535895	1302424.23097451	100784.612854348	167
SC + 180 mM VitC	wt	37	5817659.65065335	1350534.36285468	50331.4440215405	720
SC + 180 mM VitC	MIP1	37.3333333333333	2497011.21590634	1052034.3847167	57393.1809721497	336
SC + 180 mM VitC	SOD2	37.3333333333333	5230961.2332854	1314972.9895625	101755.664947833	167
SC + 180 mM VitC	wt	37.3333333333333	5868849.30030087	1367281.66473794	50955.5791123852	720
SC + 180 mM VitC	MIP1	37.6666666666667	2513930.00738438	1061314.43372079	57899.4491508895	336
SC + 180 mM VitC	SOD2	37.6666666666667	5282254.01578604	1327862.51698335	102753.086525297	167
SC + 180 mM VitC	wt	37.6666666666667	5922181.39174074	1385126.29374478	51620.6091705945	720
SC + 180 mM VitC	MIP1	38	2528514.90152798	1069396.73050176	58340.3745888404	336
SC + 180 mM VitC	SOD2	38	5325100.96550421	1338309.97235517	103561.534894055	167
SC + 180 mM VitC	wt	38	5967833.49736645	1400411.64025271	52190.2604014508	720
SC + 180 mM VitC	MIP1	38.3333333333333	2543918.58140164	1078521.39581631	58838.165892353	336
SC + 180 mM VitC	SOD2	38.3333333333333	5371341.39427148	1351512.28653679	104583.16063775	167
SC + 180 mM VitC	wt	38.3333333333333	6018523.94365994	1419298.16184038	52894.1195035932	720
SC + 180 mM VitC	MIP1	38.6666666666667	2560060.87155882	1088012.83841225	59355.9665369989	336
SC + 180 mM VitC	SOD2	38.6666666666667	5418362.87650923	1363299.77330271	105495.303749016	167
SC + 180 mM VitC	wt	38.6666666666667	6070720.22926096	1437488.57481426	53572.0361693996	720
SC + 180 mM VitC	MIP1	39	2574838.06624404	1096759.31478625	59833.1259423321	336
SC + 180 mM VitC	SOD2	39	5461433.23381513	1374069.28375795	106328.673488344	167
SC + 180 mM VitC	wt	39	6119081.46514223	1454914.08889991	54221.4467367063	720
SC + 180 mM VitC	MIP1	39.3333333333333	2589564.13187643	1106041.14903997	60339.4915144236	336
SC + 180 mM VitC	SOD2	39.3333333333333	5505634.29435018	1385783.63948583	107235.157549985	167
SC + 180 mM VitC	wt	39.3333333333333	6167454.21734197	1472331.03515337	54870.5379997594	720
SC + 180 mM VitC	MIP1	39.6666666666667	2604030.62863509	1115598.84867237	60860.9067767464	336
SC + 180 mM VitC	SOD2	39.6666666666667	5551581.46210317	1399407.1541297	108289.376764005	167
SC + 180 mM VitC	wt	39.6666666666667	6217414.33685915	1491389.03950235	55580.7878870896	720
SC + 180 mM VitC	MIP1	40	2618022.43550056	1125226.69613301	61386.1489168403	336
SC + 180 mM VitC	SOD2	40	5597472.46419078	1413463.4849123	109377.08829638	167
SC + 180 mM VitC	wt	40	6266503.30916796	1510615.48300425	56297.3151310196	720
SC + 180 mM VitC	MIP1	40.3333333333333	2630029.04284766	1134360.19301188	61884.4220216863	336
SC + 180 mM VitC	SOD2	40.3333333333333	5640409.61696259	1428623.49606209	110550.205179699	167
SC + 180 mM VitC	wt	40.3333333333333	6311654.01675117	1529562.85156804	57003.4418660759	720
SC + 180 mM VitC	MIP1	40.6666666666667	2642983.00421176	1143762.77233246	62397.3747772148	336
SC + 180 mM VitC	SOD2	40.6666666666667	5685608.09992515	1443301.41171697	111686.016393591	167
SC + 180 mM VitC	wt	40.6666666666667	6359047.70583684	1548480.83078282	57708.4733247621	720
SC + 180 mM VitC	MIP1	41	2655290.05714159	1152388.33186686	62867.93762814	336
SC + 180 mM VitC	SOD2	41	5727451.5139178	1456432.33884766	112702.118041435	167
SC + 180 mM VitC	wt	41	6403804.25236663	1566438.58099133	58377.7191612486	720
SC + 180 mM VitC	MIP1	41.3333333333333	2667561.14550625	1160921.81007447	63333.4770308502	336
SC + 180 mM VitC	SOD2	41.3333333333333	5767887.19679565	1468416.18864424	113629.456180214	167
SC + 180 mM VitC	wt	41.3333333333333	6447538.31442177	1584227.55425115	59040.6750522302	720
SC + 180 mM VitC	MIP1	41.6666666666667	2679957.70907554	1169745.30479955	63814.838131704	336
SC + 180 mM VitC	SOD2	41.6666666666667	5808324.43961385	1478379.46135116	114400.437369483	167
SC + 180 mM VitC	wt	41.6666666666667	6492572.99044642	1600807.92166931	59658.588862879	720
SC + 180 mM VitC	MIP1	42	2692057.48558356	1178079.60848213	64269.5116732536	336
SC + 180 mM VitC	SOD2	42	5846480.94599611	1487803.19198661	115129.667539769	167
SC + 180 mM VitC	wt	42	6536056.54347793	1617795.13752895	60291.6650197227	720
SC + 180 mM VitC	MIP1	42.3333333333333	2702936.05332906	1186752.20803758	64742.6407677164	336
SC + 180 mM VitC	SOD2	42.3333333333333	5884440.95596549	1499728.26419589	116052.457332287	167
SC + 180 mM VitC	wt	42.3333333333333	6579237.86831452	1635694.7336427	60958.7435810583	720
SC + 180 mM VitC	MIP1	42.6666666666667	2714254.30891615	1195535.85202506	65221.8278325994	336
SC + 180 mM VitC	SOD2	42.6666666666667	5925022.26866125	1512024.07397602	117003.935659356	167
SC + 180 mM VitC	wt	42.6666666666667	6624030.0805013	1654052.04697392	61642.8802559392	720
SC + 180 mM VitC	MIP1	43	2726175.677468	1204760.1213616	65725.0529809967	336
SC + 180 mM VitC	SOD2	43	5969599.10332523	1526395.12174962	118116.000723663	167
SC + 180 mM VitC	wt	43	6671279.0386089	1673644.16186592	62373.0352679644	720
SC + 180 mM VitC	MIP1	43.3333333333333	2737372.4957903	1213117.39451685	66180.9796100129	336
SC + 180 mM VitC	SOD2	43.3333333333333	6010452.63428014	1541313.02780536	119270.382952332	167
SC + 180 mM VitC	wt	43.3333333333333	6712659.7852749	1691924.57968376	63054.3062162608	720
SC + 180 mM VitC	MIP1	43.6666666666667	2749778.89561551	1222993.88346595	66719.7862553658	336
SC + 180 mM VitC	SOD2	43.6666666666667	6056691.50497486	1557312.99354734	120508.497473422	167
SC + 180 mM VitC	wt	43.6666666666667	6760747.01924259	1712377.05458358	63816.5249526627	720
SC + 180 mM VitC	MIP1	44	2760809.81849347	1231444.60781073	67180.8110647365	336
SC + 180 mM VitC	SOD2	44	6096631.10175856	1569744.71735522	121470.49314372	167
SC + 180 mM VitC	wt	44	6802714.07732778	1729576.69141039	64457.5175715467	720
SC + 180 mM VitC	MIP1	44.3333333333333	2771679.08164203	1240392.56882133	67668.9623581487	336
SC + 180 mM VitC	SOD2	44.3333333333333	6135714.96638895	1581920.89449605	122412.714019223	167
SC + 180 mM VitC	wt	44.3333333333333	6844689.17331982	1746786.80104261	65098.9004888445	720
SC + 180 mM VitC	MIP1	44.6666666666667	2782669.47034709	1249631.76559131	68173.0018648036	336
SC + 180 mM VitC	SOD2	44.6666666666667	6175461.60544514	1594103.14873732	123355.405154876	167
SC + 180 mM VitC	wt	44.6666666666667	6888753.10997064	1764420.78436821	65756.0802460135	720
SC + 180 mM VitC	MIP1	45	2793634.72798177	1259109.80483488	68690.0712966297	336
SC + 180 mM VitC	SOD2	45	6217066.67683673	1606145.17069202	124287.244790399	167
SC + 180 mM VitC	wt	45	6936728.73679583	1784132.64638383	66490.6979698473	720
SC + 180 mM VitC	MIP1	45.3333333333333	2802765.46216138	1266792.20902761	69109.1808053494	336
SC + 180 mM VitC	SOD2	45.3333333333333	6252085.87880877	1616391.12812194	125080.100780282	167
SC + 180 mM VitC	wt	45.3333333333333	6976622.2922248	1801096.89547893	67122.918205912	720
SC + 180 mM VitC	MIP1	45.6666666666667	2811709.96959566	1274526.88597592	69531.1420266787	336
SC + 180 mM VitC	SOD2	45.6666666666667	6288306.40275387	1628444.94249876	126012.852940826	167
SC + 180 mM VitC	wt	45.6666666666667	7016589.06060713	1819157.25522069	67795.9880739234	720
SC + 180 mM VitC	MIP1	46	2820070.82323109	1282336.22780321	69957.1765510995	336
SC + 180 mM VitC	SOD2	46	6326187.89897275	1641918.52395867	127055.469976738	167
SC + 180 mM VitC	wt	46	7057842.66666943	1838137.56502324	68503.3424564652	720
SC + 180 mM VitC	MIP1	46.3333333333333	2829072.50586397	1291396.56718635	70451.4585873523	336
SC + 180 mM VitC	SOD2	46.3333333333333	6368250.53057318	1658260.76595867	128320.070629867	167
SC + 180 mM VitC	wt	46.3333333333333	7102350.89867483	1859651.94071006	69305.1358986185	720
SC + 180 mM VitC	MIP1	46.6666666666667	2837760.15953661	1299855.11208515	70912.9100429228	336
SC + 180 mM VitC	SOD2	46.6666666666667	6407683.75293446	1672481.45030846	129420.500223108	167
SC + 180 mM VitC	wt	46.6666666666667	7142518.3220644	1877092.7728319	69955.1173354282	720
SC + 180 mM VitC	MIP1	47	2846751.68061759	1308611.94423472	71390.63440213	336
SC + 180 mM VitC	SOD2	47	6448225.56505847	1688199.81752505	130636.823996077	167
SC + 180 mM VitC	wt	47	7184081.44575644	1895090.50531354	70625.8532232584	720
SC + 180 mM VitC	MIP1	47.3333333333333	2854954.38475638	1316965.52259335	71846.3594634654	336
SC + 180 mM VitC	SOD2	47.3333333333333	6485780.2422448	1702159.61423758	131717.065497838	167
SC + 180 mM VitC	wt	47.3333333333333	7224369.59990286	1913073.2997155	71296.032401728	720
SC + 180 mM VitC	MIP1	47.6666666666667	2862974.22207811	1324671.27417101	72266.7426764557	336
SC + 180 mM VitC	SOD2	47.6666666666667	6520094.41702821	1714094.8997555	132640.645619908	167
SC + 180 mM VitC	wt	47.6666666666667	7262412.30373622	1929544.06470883	71909.8615711698	720
SC + 180 mM VitC	MIP1	48	2869705.96135254	1330871.18523882	72604.9755546725	336
SC + 180 mM VitC	SOD2	48	6549556.90234928	1723187.53488097	133344.254850413	167
SC + 180 mM VitC	wt	48	7295976.25071686	1943731.06507117	72438.5798579532	720
SC + 180 mM VitC	MIP1	48.3333333333333	2876269.93245597	1337175.77830365	72948.9193040236	336
SC + 180 mM VitC	SOD2	48.3333333333333	6579231.80874075	1733796.50493126	134165.20160023	167
SC + 180 mM VitC	wt	48.3333333333333	7329458.89270311	1959660.20071616	73032.2236933702	720
SC + 180 mM VitC	MIP1	48.6666666666667	2883234.35276315	1344171.5558254	73330.5702568625	336
SC + 180 mM VitC	SOD2	48.6666666666667	6611628.63604444	1746970.29004093	135184.619698057	167
SC + 180 mM VitC	wt	48.6666666666667	7366493.2428119	1978567.33997753	73736.851170845	720
SC + 180 mM VitC	MIP1	49	2891114.31881848	1352260.97506991	73771.8842570552	336
SC + 180 mM VitC	SOD2	49	6648112.16270122	1761165.5488704	136283.081805465	167
SC + 180 mM VitC	wt	49	7407018.44707644	1998043.12290065	74462.6707463638	720
SC + 180 mM VitC	MIP1	49.3333333333333	2899175.85273073	1360172.0454915	74203.4685312825	336
SC + 180 mM VitC	SOD2	49.3333333333333	6685190.47708374	1775946.74146182	137426.884828645	167
SC + 180 mM VitC	wt	49.3333333333333	7446805.08291573	2016861.56658468	75163.9927348345	720
SC + 180 mM VitC	MIP1	49.6666666666667	2906541.87631837	1367858.27111022	74622.7865158809	336
SC + 180 mM VitC	SOD2	49.6666666666667	6721416.6469241	1791502.81914548	138630.650260517	167
SC + 180 mM VitC	wt	49.6666666666667	7484973.95788708	2035055.58313663	75842.0436980664	720
SC + 180 mM VitC	MIP1	50	2912541.9640748	1374919.33384194	75007.9990689162	336
SC + 180 mM VitC	SOD2	50	6754852.63187047	1807857.97371086	139896.250117955	167
SC + 180 mM VitC	wt	50	7521771.77490327	2054856.39734121	76579.9764742545	720
SC + 180 mM VitC	MIP1	50.3333333333333	2915203.6326037	1380520.86993005	75313.5879157234	336
SC + 180 mM VitC	SOD2	50.3333333333333	6781337.55347858	1822139.58068361	141001.394045299	167
SC + 180 mM VitC	wt	50.3333333333333	7552583.02139836	2073533.0546622	77276.0143969578	720
SC + 180 mM VitC	MIP1	50.6666666666667	2916599.7367994	1384653.27206823	75539.0289347732	336
SC + 180 mM VitC	SOD2	50.6666666666667	6802717.66473547	1835505.92549328	142035.712860077	167
SC + 180 mM VitC	wt	50.6666666666667	7578473.48522146	2091238.28746082	77935.8494652105	720
SC + 180 mM VitC	MIP1	51	2916413.27820755	1387699.96026907	75705.2394026215	336
SC + 180 mM VitC	SOD2	51	6821608.03041567	1852082.42529472	143318.440926122	167
SC + 180 mM VitC	wt	51	7602244.28468388	2112549.73443931	78730.0802009239	720
SC + 180 mM VitC	MIP1	51.3333333333333	2922088.63649618	1394559.55338059	76079.4608867901	336
SC + 180 mM VitC	SOD2	51.3333333333333	6856729.02729252	1866556.8207417	144438.503273499	167
SC + 180 mM VitC	wt	51.3333333333333	7643093.98502252	2133867.95613434	79524.5634154156	720
SC + 180 mM VitC	MIP1	51.6666666666667	2933790.11868897	1405841.3169529	76694.9315480126	336
SC + 180 mM VitC	SOD2	51.6666666666667	6912082.63430555	1884315.55673728	145812.71552288	167
SC + 180 mM VitC	wt	51.6666666666667	7702812.67303554	2158649.23345366	80448.1070930034	720
SC + 180 mM VitC	MIP1	52	2946584.08836581	1416163.86096445	77258.0724920301	336
SC + 180 mM VitC	SOD2	52	6962948.36416799	1898037.58949235	146874.558297227	167
SC + 180 mM VitC	wt	52	7756007.29731856	2177053.87196497	81134.0074732132	720
SC + 180 mM VitC	MIP1	52.3333333333333	2959302.09554326	1426919.92295669	77844.8637808284	336
SC + 180 mM VitC	SOD2	52.3333333333333	7015753.19400925	1913544.29941216	148074.503536839	167
SC + 180 mM VitC	wt	52.3333333333333	7810369.32416849	2196099.96401845	81843.8134155016	720
SC + 180 mM VitC	MIP1	52.6666666666667	2971789.56431572	1437778.37215735	78437.240749779	336
SC + 180 mM VitC	SOD2	52.6666666666667	7065943.15326275	1925278.18155313	148982.498597689	167
SC + 180 mM VitC	wt	52.6666666666667	7862574.08450686	2211022.15369479	82399.9305903255	720
SC + 180 mM VitC	MIP1	53	2976223.45112183	1443214.2803134	78733.7938521116	336
SC + 180 mM VitC	SOD2	53	7093475.5656267	1939843.17662193	150109.571754287	167
SC + 180 mM VitC	wt	53	7893242.03811186	2227853.36579844	83027.1928304503	720
SC + 180 mM VitC	MIP1	53.3333333333333	2978417.921507	1447115.67152011	78946.6321916402	336
SC + 180 mM VitC	SOD2	53.3333333333333	7115037.48764181	1955784.59658394	151343.155866906	167
SC + 180 mM VitC	wt	53.3333333333333	7919091.10358825	2245881.37457379	83699.0570491278	720
SC + 180 mM VitC	MIP1	53.6666666666667	2981540.37218206	1451701.48926928	79196.8090601975	336
SC + 180 mM VitC	SOD2	53.6666666666667	7137793.06253338	1969600.90751831	152412.294105799	167
SC + 180 mM VitC	wt	53.6666666666667	7945567.75608256	2262701.36552273	84325.9011015069	720
SC + 180 mM VitC	MIP1	54	2987702.3293152	1458948.38286586	79592.1595180501	336
SC + 180 mM VitC	SOD2	54	7174519.80593076	1981795.92986777	153355.973267327	167
SC + 180 mM VitC	wt	54	7988297.46367573	2282713.16868051	85071.696971726	720
SC + 180 mM VitC	MIP1	54.3333333333333	2998943.29605527	1469877.86759869	80188.4117929916	336
SC + 180 mM VitC	SOD2	54.3333333333333	7228511.931348	1995226.365678	154395.251592629	167
SC + 180 mM VitC	wt	54.3333333333333	8047941.89954706	2305829.06464797	85933.1755507935	720
SC + 180 mM VitC	MIP1	54.6666666666667	3008942.26887917	1478873.37094945	80679.156733695	336
SC + 180 mM VitC	SOD2	54.6666666666667	7273980.93773422	2004790.71952111	155135.363513426	167
SC + 180 mM VitC	wt	54.6666666666667	8096413.3737868	2322161.93358692	86541.8656377119	720
SC + 180 mM VitC	MIP1	55	3017874.11411205	1487552.07692446	81152.6189606563	336
SC + 180 mM VitC	SOD2	55	7320341.50463256	2016531.08361622	156043.860162947	167
SC + 180 mM VitC	wt	55	8144372.95807857	2339530.28206467	87189.1457685978	720
SC + 180 mM VitC	MIP1	55.3333333333333	3025283.43740414	1495851.57984387	81605.3939649261	336
SC + 180 mM VitC	SOD2	55.3333333333333	7365559.29271739	2028681.8269805	156984.112913731	167
SC + 180 mM VitC	wt	55.3333333333333	8191090.71193333	2356564.2810793	87823.9654306874	720
SC + 180 mM VitC	MIP1	55.6666666666667	3028970.31118349	1500729.74156791	81871.5195048389	336
SC + 180 mM VitC	SOD2	55.6666666666667	7392866.03041407	2041202.48357521	157952.990409687	167
SC + 180 mM VitC	wt	55.6666666666667	8219117.98149257	2369905.93358175	88321.1794628149	720
SC + 180 mM VitC	MIP1	56	3031091.37098713	1505191.50225058	82114.9285055662	336
SC + 180 mM VitC	SOD2	56	7418491.16412567	2054328.70477918	158968.727901989	167
SC + 180 mM VitC	wt	56	8247610.04234007	2385364.47223181	88897.2851837206	720
SC + 180 mM VitC	MIP1	56.3333333333333	3034227.0655136	1510096.02607262	82382.4922158307	336
SC + 180 mM VitC	SOD2	56.3333333333333	7446107.9063717	2065010.00773562	159795.271940132	167
SC + 180 mM VitC	wt	56.3333333333333	8278582.63132736	2399512.60588321	89424.5549937085	720
SC + 180 mM VitC	MIP1	56.6666666666667	3038730.60557998	1515053.72379771	82652.9568003303	336
SC + 180 mM VitC	SOD2	56.6666666666667	7471624.09195978	2070695.13723821	160235.200469039	167
SC + 180 mM VitC	wt	56.6666666666667	8308183.10277779	2409377.48649715	89792.1973877534	720
SC + 180 mM VitC	MIP1	57	3044606.23704607	1520723.78768768	82962.2841452235	336
SC + 180 mM VitC	SOD2	57	7502905.17372957	2078221.69147237	160817.622721771	167
SC + 180 mM VitC	wt	57	8345259.37901305	2424929.02914435	90371.7691629888	720
SC + 180 mM VitC	MIP1	57.3333333333333	3050358.89193428	1526359.97354853	83269.7632921062	336
SC + 180 mM VitC	SOD2	57.3333333333333	7536042.4278666	2087398.93556146	161527.779190448	167
SC + 180 mM VitC	wt	57.3333333333333	8382832.91831809	2441122.8995336	90975.2790798086	720
SC + 180 mM VitC	MIP1	57.6666666666667	3056485.00496311	1531995.51185373	83577.2071119327	336
SC + 180 mM VitC	SOD2	57.6666666666667	7569460.42753945	2096296.83525057	162216.319340467	167
SC + 180 mM VitC	wt	57.6666666666667	8418819.61123332	2456042.18628636	91531.2880690583	720
SC + 180 mM VitC	MIP1	58	3061695.49278305	1537787.91518349	83893.2086204366	336
SC + 180 mM VitC	SOD2	58	7603507.61679972	2108272.62269038	163143.033595349	167
SC + 180 mM VitC	wt	58	8455350.6613412	2473969.35028658	92199.3940248628	720
SC + 180 mM VitC	MIP1	58.3333333333333	3066471.09273692	1543937.84283262	84228.7146796108	336
SC + 180 mM VitC	SOD2	58.3333333333333	7639874.67357219	2121340.30015928	164154.240837419	167
SC + 180 mM VitC	wt	58.3333333333333	8493555.87775413	2493216.61678877	92916.6972961956	720
SC + 180 mM VitC	MIP1	58.6666666666667	3070114.98370035	1548821.15541818	84495.1212220571	336
SC + 180 mM VitC	SOD2	58.6666666666667	7670268.08907269	2132929.68302786	165051.054208863	167
SC + 180 mM VitC	wt	58.6666666666667	8523420.29155657	2506359.01609075	93406.4855999734	720
SC + 180 mM VitC	MIP1	59	3074195.28458374	1553826.39202148	84768.1792649827	336
SC + 180 mM VitC	SOD2	59	7700399.83421157	2143213.71650794	165846.856611967	167
SC + 180 mM VitC	wt	59	8554244.42571904	2518621.19844233	93863.4701548173	720
SC + 180 mM VitC	MIP1	59.3333333333333	3077716.16272467	1559082.23977836	85054.9092672096	336
SC + 180 mM VitC	SOD2	59.3333333333333	7731807.94336924	2154333.15714872	166707.30476203	167
SC + 180 mM VitC	wt	59.3333333333333	8588383.9894716	2533074.45026724	94402.1110477575	720
SC + 180 mM VitC	MIP1	59.6666666666667	3081637.75574793	1564166.36163365	85332.2708534507	336
SC + 180 mM VitC	SOD2	59.6666666666667	7762520.44862875	2163275.35889059	167399.273107817	167
SC + 180 mM VitC	wt	59.6666666666667	8622327.95576086	2545975.72340256	94882.9131098722	720
SC + 180 mM VitC	MIP1	60	3085710.30540914	1568674.88386144	85578.2309056084	336
SC + 180 mM VitC	SOD2	60	7791914.91390899	2171953.26338748	168070.789518757	167
SC + 180 mM VitC	wt	60	8655725.89736239	2559064.59519311	95370.7065610795	720
SC + 180 mM VitC	MIP1	60.3333333333333	3090199.53180924	1573953.5275953	85866.2045303361	336
SC + 180 mM VitC	SOD2	60.3333333333333	7827143.5068128	2185225.9514782	169097.860959035	167
SC + 180 mM VitC	wt	60.3333333333333	8695975.67104435	2576870.50976632	96034.2938175336	720
SC + 180 mM VitC	MIP1	60.6666666666667	3094033.26731125	1578704.42962486	86125.3874847383	336
SC + 180 mM VitC	SOD2	60.6666666666667	7860732.04498872	2198116.96699145	170095.397688545	167
SC + 180 mM VitC	wt	60.6666666666667	8732849.2058901	2593710.7945547	96661.894176655	720
SC + 180 mM VitC	MIP1	61	3097573.44933986	1582531.36539667	86334.1639472863	336
SC + 180 mM VitC	SOD2	61	7890494.52980059	2211357.9296866	171120.014144008	167
SC + 180 mM VitC	wt	61	8764205.95900446	2609326.77237668	97243.8673090729	720
SC + 180 mM VitC	MIP1	61.3333333333333	3099009.71584772	1585642.4524567	86503.8876609316	336
SC + 180 mM VitC	SOD2	61.3333333333333	7917749.20670445	2230941.4744933	172635.434338688	167
SC + 180 mM VitC	wt	61.3333333333333	8793314.86428664	2629569.0482515	97998.2523903297	720
SC + 180 mM VitC	MIP1	61.6666666666667	3099090.31449854	1588523.75152409	86661.0754118377	336
SC + 180 mM VitC	SOD2	61.6666666666667	7943857.37078896	2252102.73611063	174272.94192561	167
SC + 180 mM VitC	wt	61.6666666666667	8820524.50321576	2649539.69005322	98742.5142673788	720
SC + 180 mM VitC	MIP1	62	3100022.21107048	1591809.7905652	86840.3435385336	336
SC + 180 mM VitC	SOD2	62	7964951.48088991	2266854.77926646	175414.489297743	167
SC + 180 mM VitC	wt	62	8842851.23599687	2665361.5622439	99332.1606298735	720
SC + 180 mM VitC	MIP1	62.3333333333333	3102459.72851745	1596560.94083799	87099.5400357141	336
SC + 180 mM VitC	SOD2	62.3333333333333	7995757.90085089	2279422.53815523	176387.011678645	167
SC + 180 mM VitC	wt	62.3333333333333	8875215.58099756	2680602.0258696	99900.1391744678	720
SC + 180 mM VitC	MIP1	62.6666666666667	3108478.18197941	1604807.60020827	87549.4321880336	336
SC + 180 mM VitC	SOD2	62.6666666666667	8043940.08264779	2292090.92307625	177367.320735702	167
SC + 180 mM VitC	wt	62.6666666666667	8926738.48779418	2699538.54940105	100605.861739032	720
SC + 180 mM VitC	MIP1	63	3115841.3417423	1612363.49410114	87961.6399940711	336
SC + 180 mM VitC	SOD2	63	8088235.97304308	2299028.52073628	177904.168160432	167
SC + 180 mM VitC	wt	63	8974125.46644931	2713965.76793717	101143.532428582	720
SC + 180 mM VitC	MIP1	63.3333333333333	3123669.49178972	1619832.64706221	88369.1156943248	336
SC + 180 mM VitC	SOD2	63.3333333333333	8129074.56303339	2303928.38915314	178283.331362165	167
SC + 180 mM VitC	wt	63.3333333333333	9018817.95390363	2726983.52551585	101628.675609591	720
SC + 180 mM VitC	MIP1	63.6666666666667	3130167.78302436	1626326.59248789	88723.3894618497	336
SC + 180 mM VitC	SOD2	63.6666666666667	8172270.51021012	2311907.90788817	178900.805060325	167
SC + 180 mM VitC	wt	63.6666666666667	9065077.56256913	2742790.70344039	102217.77434912	720
SC + 180 mM VitC	MIP1	64	3134609.95749829	1631338.00015121	88996.7841637002	336
SC + 180 mM VitC	SOD2	64	8204001.5139737	2322625.76316236	179730.177601737	167
SC + 180 mM VitC	wt	64	9100785.52222309	2759811.3896525	102852.097872352	720
SC + 180 mM VitC	MIP1	64.3333333333333	3138003.1714023	1635206.51892092	89207.8291647659	336
SC + 180 mM VitC	SOD2	64.3333333333333	8231063.27618934	2331404.4848847	180409.495483807	167
SC + 180 mM VitC	wt	64.3333333333333	9129623.74471458	2773014.05848214	103344.132288811	720
SC + 180 mM VitC	MIP1	64.6666666666667	3140337.1248581	1638637.266192	89394.991772623	336
SC + 180 mM VitC	SOD2	64.6666666666667	8256621.52989265	2340166.06393425	181087.486826029	167
SC + 180 mM VitC	wt	64.6666666666667	9156574.95082467	2783966.73204505	103752.314332511	720
SC + 180 mM VitC	MIP1	65	3142382.07635356	1641878.52376785	89571.8168701013	336
SC + 180 mM VitC	SOD2	65	8285197.13189228	2350116.93582252	181857.50841114	167
SC + 180 mM VitC	wt	65	9187326.54853464	2796745.48445513	104228.550316787	720
SC + 180 mM VitC	MIP1	65.3333333333333	3144422.76491773	1644881.40264243	89735.6373432626	336
SC + 180 mM VitC	SOD2	65.3333333333333	8311068.34880778	2357800.66552248	182452.093266574	167
SC + 180 mM VitC	wt	65.3333333333333	9215551.13423453	2806315.66808233	104585.21000258	720
SC + 180 mM VitC	MIP1	65.6666666666667	3146987.9898411	1648065.00777494	89909.3172421031	336
SC + 180 mM VitC	SOD2	65.6666666666667	8339908.70346703	2366800.84035099	183148.547704492	167
SC + 180 mM VitC	wt	65.6666666666667	9248991.40545917	2818988.99025908	105057.516834047	720
SC + 180 mM VitC	MIP1	66	3149692.74974074	1651588.16872035	90101.5214292204	336
SC + 180 mM VitC	SOD2	66	8370414.98357405	2376653.18912448	183910.945342087	167
SC + 180 mM VitC	wt	66	9284657.28986409	2833133.12654387	105584.637670977	720
SC + 180 mM VitC	MIP1	66.3333333333333	3153198.49855987	1655483.57767974	90314.0334104016	336
SC + 180 mM VitC	SOD2	66.3333333333333	8402731.94992629	2387886.53182448	184780.207498115	167
SC + 180 mM VitC	wt	66.3333333333333	9321296.08270346	2848152.08380929	106144.361160921	720
SC + 180 mM VitC	MIP1	66.6666666666667	3158042.58953405	1660777.86876691	90602.8606682359	336
SC + 180 mM VitC	SOD2	66.6666666666667	8440318.69318927	2401387.57224478	185824.949372176	167
SC + 180 mM VitC	wt	66.6666666666667	9363192.39062889	2866289.361489	106820.297591231	720
SC + 180 mM VitC	MIP1	67	3162660.95519633	1665976.40138258	90886.4638731643	336
SC + 180 mM VitC	SOD2	67	8477794.95181707	2415753.56383572	186936.623177322	167
SC + 180 mM VitC	wt	67	9404800.77234974	2884392.85799655	107494.975071587	720
SC + 180 mM VitC	MIP1	67.3333333333333	3167783.56821646	1671091.2580019	91165.5021782463	336
SC + 180 mM VitC	SOD2	67.3333333333333	8512586.84095542	2427053.98898932	187811.076329458	167
SC + 180 mM VitC	wt	67.3333333333333	9440590.78034976	2897350.98298043	107977.895877001	720
SC + 180 mM VitC	MIP1	67.6666666666667	3171476.04958016	1675289.96169807	91394.5602438221	336
SC + 180 mM VitC	SOD2	67.6666666666667	8543756.18495922	2437991.9016987	188657.477426454	167
SC + 180 mM VitC	wt	67.6666666666667	9470923.56091766	2908451.74066593	108391.59669011	720
SC + 180 mM VitC	MIP1	68	3175343.48485035	1680023.29951903	91652.7849920884	336
SC + 180 mM VitC	SOD2	68	8578120.91280181	2447020.82971174	189356.15685259	167
SC + 180 mM VitC	wt	68	9508953.96205873	2922443.86774708	108913.052478498	720
SC + 180 mM VitC	MIP1	68.3333333333333	3177352.32847696	1683255.97884333	91829.1421075779	336
SC + 180 mM VitC	SOD2	68.3333333333333	8607358.88772935	2454753.58860587	189954.535700976	167
SC + 180 mM VitC	wt	68.3333333333333	9543593.00649965	2934127.52219755	109348.476571446	720
SC + 180 mM VitC	MIP1	68.6666666666667	3180815.94508392	1686846.52943122	92025.0227010967	336
SC + 180 mM VitC	SOD2	68.6666666666667	8638331.14299157	2461363.12184385	190465.996738552	167
SC + 180 mM VitC	wt	68.6666666666667	9581258.89496271	2945582.67736311	109775.384998829	720
SC + 180 mM VitC	MIP1	69	3183661.78238516	1690004.82185557	92197.3216784941	336
SC + 180 mM VitC	SOD2	69	8670177.19432465	2468153.25326232	190991.432882909	167
SC + 180 mM VitC	wt	69	9620964.39914547	2956208.75134145	110171.395394654	720
SC + 180 mM VitC	MIP1	69.3333333333333	3186470.15501116	1692886.72147254	92354.542192066	336
SC + 180 mM VitC	SOD2	69.3333333333333	8698659.54705879	2473850.85707926	191432.326703242	167
SC + 180 mM VitC	wt	69.3333333333333	9658785.80473999	2966583.97555025	110558.057171532	720
SC + 180 mM VitC	MIP1	69.6666666666667	3188498.0454712	1694470.62363529	92440.9511391398	336
SC + 180 mM VitC	SOD2	69.6666666666667	8716659.34603201	2478047.7068815	191757.088691285	167
SC + 180 mM VitC	wt	69.6666666666667	9681265.90282834	2970378.26395544	110699.461951536	720
SC + 180 mM VitC	MIP1	70	3190013.99457897	1695082.10915557	92474.3104091763	336
SC + 180 mM VitC	SOD2	70	8722152.05337951	2478318.73913642	191778.061796847	167
SC + 180 mM VitC	wt	70	9687646.5367244	2971089.46657251	110725.966908162	720
SC + 180 mM VitC + 400 mg/L PQ	MIP1	0	1940.26021559413	7331.95060241087	399.990697943153	328
SC + 180 mM VitC + 400 mg/L PQ	SOD2	0	3013.38597264063	17156.7562200318	1327.62965579851	167
SC + 180 mM VitC + 400 mg/L PQ	wt	0	2914.487782857	6035.95482862737	224.946755098815	720
SC + 180 mM VitC + 400 mg/L PQ	MIP1	0.333333333333333	1939.8586974747	7329.37369152195	399.850115928777	328
SC + 180 mM VitC + 400 mg/L PQ	SOD2	0.333333333333333	3015.09322539179	17156.7675985114	1327.63053629171	167
SC + 180 mM VitC + 400 mg/L PQ	wt	0.333333333333333	2911.3350886737	6032.81945555028	224.829906643228	720
SC + 180 mM VitC + 400 mg/L PQ	MIP1	0.666666666666667	1938.77376674145	7322.01634491871	399.448739765403	328
SC + 180 mM VitC + 400 mg/L PQ	SOD2	0.666666666666667	3020.72581860647	17138.5141454832	1326.21804168898	167
SC + 180 mM VitC + 400 mg/L PQ	wt	0.666666666666667	2900.35359884227	6035.22050024775	224.919388295904	720
SC + 180 mM VitC + 400 mg/L PQ	MIP1	1	1934.92091078883	7313.21541868215	398.968609876537	328
SC + 180 mM VitC + 400 mg/L PQ	SOD2	1	3037.34415175081	17123.6217239247	1325.06563150992	167
SC + 180 mM VitC + 400 mg/L PQ	wt	1	2882.19451172044	6033.07106675078	224.839283639032	720
SC + 180 mM VitC + 400 mg/L PQ	MIP1	1.33333333333333	1934.96923100595	7315.68136120505	399.103138070235	328
SC + 180 mM VitC + 400 mg/L PQ	SOD2	1.33333333333333	3054.0576386111	17110.6535569774	1324.0621246232	167
SC + 180 mM VitC + 400 mg/L PQ	wt	1.33333333333333	2870.25211463663	6039.77341650954	225.089065466858	720
SC + 180 mM VitC + 400 mg/L PQ	MIP1	1.66666666666667	1933.31893238599	7327.32552186974	399.738379113689	328
SC + 180 mM VitC + 400 mg/L PQ	SOD2	1.66666666666667	3071.85768259448	17126.2912501597	1325.27220565197	167
SC + 180 mM VitC + 400 mg/L PQ	wt	1.66666666666667	2858.45025450125	6040.73099245402	225.124752215283	720
SC + 180 mM VitC + 400 mg/L PQ	MIP1	2	1932.58386586018	7346.72991251091	400.796975410447	328
SC + 180 mM VitC + 400 mg/L PQ	SOD2	2	3084.86313664741	17141.3889181664	1326.44049827804	167
SC + 180 mM VitC + 400 mg/L PQ	wt	2	2849.57599319906	6048.55474813956	225.416326374486	720
SC + 180 mM VitC + 400 mg/L PQ	MIP1	2.33333333333333	1931.36943359489	7362.91390400565	401.679884530342	328
SC + 180 mM VitC + 400 mg/L PQ	SOD2	2.33333333333333	3090.30814983662	17157.3797264736	1327.67790417555	167
SC + 180 mM VitC + 400 mg/L PQ	wt	2.33333333333333	2852.71551454815	6070.07135354448	226.218202913327	720
SC + 180 mM VitC + 400 mg/L PQ	MIP1	2.66666666666667	1930.99639949319	7375.46910909826	402.364827122039	328
SC + 180 mM VitC + 400 mg/L PQ	SOD2	2.66666666666667	3085.11013731332	17170.7515094939	1328.7126438117	167
SC + 180 mM VitC + 400 mg/L PQ	wt	2.66666666666667	2863.49852477848	6111.17813181849	227.750162089272	720
SC + 180 mM VitC + 400 mg/L PQ	MIP1	3	1929.20248883716	7378.6581056941	402.538801149317	328
SC + 180 mM VitC + 400 mg/L PQ	SOD2	3	3077.86796577601	17184.9083567715	1329.80813354398	167
SC + 180 mM VitC + 400 mg/L PQ	wt	3	2877.47318811775	6159.41108318572	229.547698056148	720
SC + 180 mM VitC + 400 mg/L PQ	MIP1	3.33333333333333	1927.51621240351	7372.76702775109	402.217416499333	328
SC + 180 mM VitC + 400 mg/L PQ	SOD2	3.33333333333333	3072.19571138634	17184.2475233712	1329.75699672018	167
SC + 180 mM VitC + 400 mg/L PQ	wt	3.33333333333333	2901.38729324893	6233.25041553079	232.299527498428	720
SC + 180 mM VitC + 400 mg/L PQ	MIP1	3.66666666666667	1928.03504680114	7368.86152144744	402.004353662861	328
SC + 180 mM VitC + 400 mg/L PQ	SOD2	3.66666666666667	3070.91118588863	17185.294498788	1329.83801411032	167
SC + 180 mM VitC + 400 mg/L PQ	wt	3.66666666666667	2938.07261637976	6330.95150135198	235.940631987956	720
SC + 180 mM VitC + 400 mg/L PQ	MIP1	4	1931.47211811606	7380.06238892909	402.615411080526	328
SC + 180 mM VitC + 400 mg/L PQ	SOD2	4	3066.62397980301	17181.8339083269	1329.57022558062	167
SC + 180 mM VitC + 400 mg/L PQ	wt	4	2981.71400668147	6453.49622422397	240.50760416505	720
SC + 180 mM VitC + 400 mg/L PQ	MIP1	4.33333333333333	1936.40011162321	7397.80610823942	403.583410328736	328
SC + 180 mM VitC + 400 mg/L PQ	SOD2	4.33333333333333	3066.91783810387	17181.9792164146	1329.58146985803	167
SC + 180 mM VitC + 400 mg/L PQ	wt	4.33333333333333	3046.45762199491	6620.46948720606	246.730330272599	720
SC + 180 mM VitC + 400 mg/L PQ	MIP1	4.66666666666667	1937.05109008751	7405.06246337202	403.979276955696	328
SC + 180 mM VitC + 400 mg/L PQ	SOD2	4.66666666666667	3067.21132288341	17187.5641930963	1330.01364832898	167
SC + 180 mM VitC + 400 mg/L PQ	wt	4.66666666666667	3137.41136300539	6846.57061777102	255.156621901479	720
SC + 180 mM VitC + 400 mg/L PQ	MIP1	5	1940.7140472981	7422.05459178208	404.906273558761	328
SC + 180 mM VitC + 400 mg/L PQ	SOD2	5	3074.48942555214	17198.5086428332	1330.86055527635	167
SC + 180 mM VitC + 400 mg/L PQ	wt	5	3261.9152915455	7143.82787146156	266.234745669095	720
SC + 180 mM VitC + 400 mg/L PQ	MIP1	5.33333333333333	1941.81430573091	7432.14228270297	405.456602216289	328
SC + 180 mM VitC + 400 mg/L PQ	SOD2	5.33333333333333	3089.59076156784	17209.254833761	1331.69212049647	167
SC + 180 mM VitC + 400 mg/L PQ	wt	5.33333333333333	3423.14379777957	7516.72505421785	280.131803156782	720
SC + 180 mM VitC + 400 mg/L PQ	MIP1	5.66666666666667	1943.94816374792	7434.72716186105	405.597618935387	328
SC + 180 mM VitC + 400 mg/L PQ	SOD2	5.66666666666667	3115.82993361428	17230.5012158603	1333.33621490404	167
SC + 180 mM VitC + 400 mg/L PQ	wt	5.66666666666667	3637.63413988748	7985.4903718092	297.601655083924	720
SC + 180 mM VitC + 400 mg/L PQ	MIP1	6	1944.371516664	7435.73373662382	405.652532090661	328
SC + 180 mM VitC + 400 mg/L PQ	SOD2	6	3145.85646670052	17241.2258162685	1334.16610939959	167
SC + 180 mM VitC + 400 mg/L PQ	wt	6	3894.97099382371	8508.91759384449	317.108635913004	720
SC + 180 mM VitC + 400 mg/L PQ	MIP1	6.33333333333333	1950.40476679099	7445.77978327403	406.200588866966	328
SC + 180 mM VitC + 400 mg/L PQ	SOD2	6.33333333333333	3178.9492409099	17242.6134353285	1334.27348658624	167
SC + 180 mM VitC + 400 mg/L PQ	wt	6.33333333333333	4209.6658441131	9128.51608070061	340.199708169108	720
SC + 180 mM VitC + 400 mg/L PQ	MIP1	6.66666666666667	1956.51332930954	7454.27315038828	406.663940030134	328
SC + 180 mM VitC + 400 mg/L PQ	SOD2	6.66666666666667	3209.96251125741	17239.3743202078	1334.02283633292	167
SC + 180 mM VitC + 400 mg/L PQ	wt	6.66666666666667	4585.23606078642	9834.51559787978	366.510756710686	720
SC + 180 mM VitC + 400 mg/L PQ	MIP1	7	1963.15253463144	7471.70680284933	407.615023744923	328
SC + 180 mM VitC + 400 mg/L PQ	SOD2	7	3244.92132387716	17239.6506338353	1334.04421812336	167
SC + 180 mM VitC + 400 mg/L PQ	wt	7	5039.45318093141	10662.8634465842	397.381458356001	720
SC + 180 mM VitC + 400 mg/L PQ	MIP1	7.33333333333333	1969.2409932101	7500.11100678238	409.164600108949	328
SC + 180 mM VitC + 400 mg/L PQ	SOD2	7.33333333333333	3293.14870765376	17231.8447694836	1333.44018220482	167
SC + 180 mM VitC + 400 mg/L PQ	wt	7.33333333333333	5580.23026194669	11599.0723019798	432.27190238603	720
SC + 180 mM VitC + 400 mg/L PQ	MIP1	7.66666666666667	1978.86913830401	7544.92579129723	411.609447041002	328
SC + 180 mM VitC + 400 mg/L PQ	SOD2	7.66666666666667	3348.39440062932	17231.3206254303	1333.39962272026	167
SC + 180 mM VitC + 400 mg/L PQ	wt	7.66666666666667	6227.10500569549	12710.3319660383	473.686104877503	720
SC + 180 mM VitC + 400 mg/L PQ	MIP1	8	1990.99305215944	7598.39488802826	414.526425411369	328
SC + 180 mM VitC + 400 mg/L PQ	SOD2	8	3430.21548912401	17233.3385366982	1333.55577338229	167
SC + 180 mM VitC + 400 mg/L PQ	wt	8	6976.69271089889	13959.713257679	520.247796509589	720
SC + 180 mM VitC + 400 mg/L PQ	MIP1	8.33333333333333	2003.86047355514	7662.84918442805	418.042695555621	328
SC + 180 mM VitC + 400 mg/L PQ	SOD2	8.33333333333333	3541.99631961498	17239.284031045	1334.01584954774	167
SC + 180 mM VitC + 400 mg/L PQ	wt	8.33333333333333	7882.2844762184	15397.7085371484	573.838716446544	720
SC + 180 mM VitC + 400 mg/L PQ	MIP1	8.66666666666667	2016.8839518141	7732.60323683483	421.848091093526	328
SC + 180 mM VitC + 400 mg/L PQ	SOD2	8.66666666666667	3677.10827735887	17245.9936400026	1334.53505467699	167
SC + 180 mM VitC + 400 mg/L PQ	wt	8.66666666666667	8918.93679271714	16977.9447219307	632.730641941182	720
SC + 180 mM VitC + 400 mg/L PQ	MIP1	9	2031.71601023522	7809.09562606776	426.021093042906	328
SC + 180 mM VitC + 400 mg/L PQ	SOD2	9	3836.81721600526	17262.0542977532	1335.77786568672	167
SC + 180 mM VitC + 400 mg/L PQ	wt	9	10128.7895703601	18784.5261101949	700.057955125259	720
SC + 180 mM VitC + 400 mg/L PQ	MIP1	9.33333333333333	2047.76417119701	7897.10201989312	430.822235439868	328
SC + 180 mM VitC + 400 mg/L PQ	SOD2	9.33333333333333	4043.17307067751	17287.5018275122	1337.74705466053	167
SC + 180 mM VitC + 400 mg/L PQ	wt	9.33333333333333	11526.8793587686	20764.7053331322	773.854877627267	720
SC + 180 mM VitC + 400 mg/L PQ	MIP1	9.66666666666667	2065.92781596237	8011.56111622469	437.066491069816	328
SC + 180 mM VitC + 400 mg/L PQ	SOD2	9.66666666666667	4275.65729159449	17325.3605396389	1340.67664976028	167
SC + 180 mM VitC + 400 mg/L PQ	wt	9.66666666666667	13148.065316537	22968.0860341267	855.970028089515	720
SC + 180 mM VitC + 400 mg/L PQ	MIP1	10	2087.00373659905	8152.08252781918	444.7325625626	328
SC + 180 mM VitC + 400 mg/L PQ	SOD2	10	4550.31373772205	17377.7640656962	1344.73175635326	167
SC + 180 mM VitC + 400 mg/L PQ	wt	10	15015.5570302978	25394.2271549207	946.386969241231	720
SC + 180 mM VitC + 400 mg/L PQ	MIP1	10.3333333333333	2116.86226915251	8322.75049394293	454.043263437198	328
SC + 180 mM VitC + 400 mg/L PQ	SOD2	10.3333333333333	4867.38138640985	17437.9560873196	1349.3895548278	167
SC + 180 mM VitC + 400 mg/L PQ	wt	10.3333333333333	17166.816227509	28097.1994023329	1047.12079734971	720
SC + 180 mM VitC + 400 mg/L PQ	MIP1	10.6666666666667	2146.39473823389	8516.58922563168	464.618033205982	328
SC + 180 mM VitC + 400 mg/L PQ	SOD2	10.6666666666667	5229.14787855796	17517.947960805	1355.57951183949	167
SC + 180 mM VitC + 400 mg/L PQ	wt	10.6666666666667	19610.5642857279	31034.2513386205	1156.57826039949	720
SC + 180 mM VitC + 400 mg/L PQ	MIP1	11	2182.3712651531	8763.03871526648	478.062955125443	328
SC + 180 mM VitC + 400 mg/L PQ	SOD2	11	5660.14194995392	17631.6436550126	1364.37754880119	167
SC + 180 mM VitC + 400 mg/L PQ	wt	11	22440.7833746798	34315.5815309974	1278.86621651244	720
SC + 180 mM VitC + 400 mg/L PQ	MIP1	11.3333333333333	2216.47462336379	9039.21984123934	493.129870783642	328
SC + 180 mM VitC + 400 mg/L PQ	SOD2	11.3333333333333	6175.11672958533	17795.0534325776	1377.02257703149	167
SC + 180 mM VitC + 400 mg/L PQ	wt	11.3333333333333	25681.7481638782	37931.3335037728	1413.61733652752	720
SC + 180 mM VitC + 400 mg/L PQ	MIP1	11.6666666666667	2252.67541901098	9354.4969103991	510.3296450016	328
SC + 180 mM VitC + 400 mg/L PQ	SOD2	11.6666666666667	6784.09135240942	18025.2828247695	1394.83826228052	167
SC + 180 mM VitC + 400 mg/L PQ	wt	11.6666666666667	29364.549851123	41867.1989553605	1560.29838152824	720
SC + 180 mM VitC + 400 mg/L PQ	MIP1	12	2286.5939429706	9715.58954905388	530.028863448349	328
SC + 180 mM VitC + 400 mg/L PQ	SOD2	12	7520.75486000081	18347.7736711135	1419.79335319858	167
SC + 180 mM VitC + 400 mg/L PQ	wt	12	33576.9463936862	46152.6540590739	1720.00786363535	720
SC + 180 mM VitC + 400 mg/L PQ	MIP1	12.3333333333333	2330.0051386536	10137.5587169985	553.049168841728	328
SC + 180 mM VitC + 400 mg/L PQ	SOD2	12.3333333333333	8403.94570632224	18767.9776644132	1452.30971444047	167
SC + 180 mM VitC + 400 mg/L PQ	wt	12.3333333333333	38360.1636762398	50801.0191947106	1893.24220409408	720
SC + 180 mM VitC + 400 mg/L PQ	MIP1	12.6666666666667	2374.20941156904	10583.7284219445	577.389721766858	328
SC + 180 mM VitC + 400 mg/L PQ	SOD2	12.6666666666667	9436.93847723662	19302.3807141236	1493.66306398077	167
SC + 180 mM VitC + 400 mg/L PQ	wt	12.6666666666667	43728.2509359348	55778.8691876136	2078.75572019288	720
SC + 180 mM VitC + 400 mg/L PQ	MIP1	13	2433.41737365728	11105.6777142036	605.864390108599	328
SC + 180 mM VitC + 400 mg/L PQ	SOD2	13	10655.627114812	19970.1355422664	1545.33548394614	167
SC + 180 mM VitC + 400 mg/L PQ	wt	13	49790.2458537844	61139.6581103458	2278.54052759716	720
SC + 180 mM VitC + 400 mg/L PQ	MIP1	13.3333333333333	2512.79739092916	11715.7451994977	639.146299994212	328
SC + 180 mM VitC + 400 mg/L PQ	SOD2	13.3333333333333	12063.364300153	20791.7997823866	1608.91777178089	167
SC + 180 mM VitC + 400 mg/L PQ	wt	13.3333333333333	56561.7743128272	66907.4861123548	2493.49478584748	720
SC + 180 mM VitC + 400 mg/L PQ	MIP1	13.6666666666667	2603.8023999119	12395.8517145641	676.249152207597	328
SC + 180 mM VitC + 400 mg/L PQ	SOD2	13.6666666666667	13709.6217080092	21798.0688920738	1686.78521330663	167
SC + 180 mM VitC + 400 mg/L PQ	wt	13.6666666666667	64181.8652671321	73168.4816605588	2726.82831339093	720
SC + 180 mM VitC + 400 mg/L PQ	MIP1	14	2701.97423996385	13147.4109081079	717.250067608245	328
SC + 180 mM VitC + 400 mg/L PQ	SOD2	14	15601.7178848711	22999.5101086934	1779.75552590107	167
SC + 180 mM VitC + 400 mg/L PQ	wt	14	72670.7474476351	79939.3454196547	2979.16350725307	720
SC + 180 mM VitC + 400 mg/L PQ	MIP1	14.3333333333333	2807.52211561399	13959.0054889748	761.526181899182	328
SC + 180 mM VitC + 400 mg/L PQ	SOD2	14.3333333333333	17787.2743185621	24424.6883626641	1890.03913024356	167
SC + 180 mM VitC + 400 mg/L PQ	wt	14.3333333333333	82134.7412676851	87180.2583528674	3249.01639955009	720
SC + 180 mM VitC + 400 mg/L PQ	MIP1	14.6666666666667	2919.19696242764	14839.2836397367	809.549292119207	328
SC + 180 mM VitC + 400 mg/L PQ	SOD2	14.6666666666667	20299.6223605062	26123.7752824314	2021.51842350465	167
SC + 180 mM VitC + 400 mg/L PQ	wt	14.6666666666667	92637.0326837876	94941.4467095659	3538.25881207939	720
SC + 180 mM VitC + 400 mg/L PQ	MIP1	15	3033.47544855677	15760.2108711861	859.789991496146	328
SC + 180 mM VitC + 400 mg/L PQ	SOD2	15	23182.1156053397	28084.1565161312	2173.21727783073	167
SC + 180 mM VitC + 400 mg/L PQ	wt	15	104265.021368381	103166.382995585	3844.78408951511	720
SC + 180 mM VitC + 400 mg/L PQ	MIP1	15.3333333333333	3156.67858757495	16745.5461628147	913.544438624713	328
SC + 180 mM VitC + 400 mg/L PQ	SOD2	15.3333333333333	26434.452792279	30314.3731720732	2345.79662402598	167
SC + 180 mM VitC + 400 mg/L PQ	wt	15.3333333333333	116993.60106275	111808.103096773	4166.84198266149	720
SC + 180 mM VitC + 400 mg/L PQ	MIP1	15.6666666666667	3292.12843392336	17841.7996809852	973.349971099447	328
SC + 180 mM VitC + 400 mg/L PQ	SOD2	15.6666666666667	30151.2285210194	32861.3991209038	2542.89140933322	167
SC + 180 mM VitC + 400 mg/L PQ	wt	15.6666666666667	131022.192542171	120830.745968043	4503.09602927589	720
SC + 180 mM VitC + 400 mg/L PQ	MIP1	16	3449.61185956689	19062.7781611542	1039.95980809096	328
SC + 180 mM VitC + 400 mg/L PQ	SOD2	16	34391.4431987828	35722.1600478825	2764.26373613542	167
SC + 180 mM VitC + 400 mg/L PQ	wt	16	146558.830721669	130518.95454965	4864.15424542037	720
SC + 180 mM VitC + 400 mg/L PQ	MIP1	16.3333333333333	3622.31516391603	20356.4291120821	1110.53425339427	328
SC + 180 mM VitC + 400 mg/L PQ	SOD2	16.3333333333333	39135.4501121464	38829.1105769597	3004.68678630884	167
SC + 180 mM VitC + 400 mg/L PQ	wt	16.3333333333333	163364.614697212	140579.781819377	5239.09914017027	720
SC + 180 mM VitC + 400 mg/L PQ	MIP1	16.6666666666667	3811.15407114418	21752.0069609716	1186.66926685546	328
SC + 180 mM VitC + 400 mg/L PQ	SOD2	16.6666666666667	44475.8170172042	42277.3473882924	3271.51936189771	167
SC + 180 mM VitC + 400 mg/L PQ	wt	16.6666666666667	181695.60900325	151172.386091472	5633.86219368959	720
SC + 180 mM VitC + 400 mg/L PQ	MIP1	17	4028.81670929412	23266.2955490135	1269.2804820782	328
SC + 180 mM VitC + 400 mg/L PQ	SOD2	17	50466.6751145347	46071.4519734132	3565.11598936079	167
SC + 180 mM VitC + 400 mg/L PQ	wt	17	201552.167661847	162260.912488181	6047.1071735786	720
SC + 180 mM VitC + 400 mg/L PQ	MIP1	17.3333333333333	4267.96409661685	24839.4324463303	1355.10213577441	328
SC + 180 mM VitC + 400 mg/L PQ	SOD2	17.3333333333333	57138.8870792243	50212.4541385247	3885.55635749453	167
SC + 180 mM VitC + 400 mg/L PQ	wt	17.3333333333333	223032.9988965	173883.219742074	6480.24499149685	720
SC + 180 mM VitC + 400 mg/L PQ	MIP1	17.6666666666667	4532.5954078322	26500.4046812807	1445.71559998727	328
SC + 180 mM VitC + 400 mg/L PQ	SOD2	17.6666666666667	64553.1553864475	54704.5139704215	4233.16238348004	167
SC + 180 mM VitC + 400 mg/L PQ	wt	17.6666666666667	246162.095816328	185874.160832822	6927.12098138198	720
SC + 180 mM VitC + 400 mg/L PQ	MIP1	18	4817.77329574133	28224.4097474677	1539.76778706215	328
SC + 180 mM VitC + 400 mg/L PQ	SOD2	18	72776.9543581994	59589.6331571709	4611.18425552054	167
SC + 180 mM VitC + 400 mg/L PQ	wt	18	271069.845956149	198223.781207336	7387.36415894416	720
SC + 180 mM VitC + 400 mg/L PQ	MIP1	18.3333333333333	5140.61407977311	30109.358993208	1642.60019896399	328
SC + 180 mM VitC + 400 mg/L PQ	SOD2	18.3333333333333	81772.0808785229	64783.4177960276	5013.09137735316	167
SC + 180 mM VitC + 400 mg/L PQ	wt	18.3333333333333	297716.457328912	210957.265153207	7861.91308716698	720
SC + 180 mM VitC + 400 mg/L PQ	MIP1	18.6666666666667	5492.537299258	32089.9171991401	1750.64850726101	328
SC + 180 mM VitC + 400 mg/L PQ	SOD2	18.6666666666667	91755.5305298279	70358.5663292056	5444.50932333334	167
SC + 180 mM VitC + 400 mg/L PQ	wt	18.6666666666667	326498.557257069	224046.720225436	8349.72827599918	720
SC + 180 mM VitC + 400 mg/L PQ	MIP1	19	5893.74842614986	34209.3345705761	1866.27220409208	328
SC + 180 mM VitC + 400 mg/L PQ	SOD2	19	102692.022384277	76278.5755762688	5902.61339255278	167
SC + 180 mM VitC + 400 mg/L PQ	wt	19	357230.301511062	237410.649804313	8847.77252574734	720
SC + 180 mM VitC + 400 mg/L PQ	MIP1	19.3333333333333	6335.98678136957	36437.4204494741	1987.82425403151	328
SC + 180 mM VitC + 400 mg/L PQ	SOD2	19.3333333333333	114485.270749978	82480.2530913238	6382.51360673619	167
SC + 180 mM VitC + 400 mg/L PQ	wt	19.3333333333333	389690.925268649	250921.003306422	9351.2736729268	720
SC + 180 mM VitC + 400 mg/L PQ	MIP1	19.6666666666667	6832.62296955871	38759.1428509742	2114.48459507376	328
SC + 180 mM VitC + 400 mg/L PQ	SOD2	19.6666666666667	127295.020807987	88985.6553231127	6885.91674512996	167
SC + 180 mM VitC + 400 mg/L PQ	wt	19.6666666666667	424097.107352175	264663.492332395	9863.42600029548	720
SC + 180 mM VitC + 400 mg/L PQ	MIP1	20	7374.88508184874	41071.1397588985	2240.61436694361	328
SC + 180 mM VitC + 400 mg/L PQ	SOD2	20	141175.789707285	95744.3846940812	7408.92292609658	167
SC + 180 mM VitC + 400 mg/L PQ	wt	20	460216.811166495	278473.992630692	10378.1129581334	720
SC + 180 mM VitC + 400 mg/L PQ	MIP1	20.3333333333333	7960.21373594944	43503.8355138836	2373.32880075333	328
SC + 180 mM VitC + 400 mg/L PQ	SOD2	20.3333333333333	155751.506899443	102722.93704308	7948.93951980768	167
SC + 180 mM VitC + 400 mg/L PQ	wt	20.3333333333333	497646.202657867	292273.483919248	10892.3896344022	720
SC + 180 mM VitC + 400 mg/L PQ	MIP1	20.6666666666667	8611.15538955348	45958.6882510532	2507.25199703963	328
SC + 180 mM VitC + 400 mg/L PQ	SOD2	20.6666666666667	171615.659589595	109997.271364466	8511.84440971857	167
SC + 180 mM VitC + 400 mg/L PQ	wt	20.6666666666667	537104.584338165	306110.450869134	11408.0629461082	720
SC + 180 mM VitC + 400 mg/L PQ	MIP1	21	9337.6095308631	48628.907835729	2652.92441809832	328
SC + 180 mM VitC + 400 mg/L PQ	SOD2	21	188993.044975512	117751.806723934	9111.90837158496	167
SC + 180 mM VitC + 400 mg/L PQ	wt	21	579188.977536054	320157.957204978	11931.5825974633	720
SC + 180 mM VitC + 400 mg/L PQ	MIP1	21.3333333333333	10129.0130409317	51337.7193955944	2800.7022040085	328
SC + 180 mM VitC + 400 mg/L PQ	SOD2	21.3333333333333	207601.183778917	125798.702547314	9734.59586537628	167
SC + 180 mM VitC + 400 mg/L PQ	wt	21.3333333333333	623214.712141357	334231.921816754	12456.0882905443	720
SC + 180 mM VitC + 400 mg/L PQ	MIP1	21.6666666666667	10990.5265754921	54211.2137894029	2957.46417506396	328
SC + 180 mM VitC + 400 mg/L PQ	SOD2	21.6666666666667	227489.347953182	134205.326831787	10385.1199832274	167
SC + 180 mM VitC + 400 mg/L PQ	wt	21.6666666666667	669536.89255284	348444.960712433	12985.7769761707	720
SC + 180 mM VitC + 400 mg/L PQ	MIP1	22	11912.2696916249	57061.5890160765	3112.96489215037	328
SC + 180 mM VitC + 400 mg/L PQ	SOD2	22	248487.468176473	142657.332618822	11039.1558271795	167
SC + 180 mM VitC + 400 mg/L PQ	wt	22	717028.879222438	362276.059843055	13501.2316071642	720
SC + 180 mM VitC + 400 mg/L PQ	MIP1	22.3333333333333	12925.279946778	60089.5298496802	3278.15260726748	328
SC + 180 mM VitC + 400 mg/L PQ	SOD2	22.3333333333333	271021.713750096	151332.910927282	11710.492232255	167
SC + 180 mM VitC + 400 mg/L PQ	wt	22.3333333333333	766609.827559898	376259.50122887	14022.3636987986	720
SC + 180 mM VitC + 400 mg/L PQ	MIP1	22.6666666666667	14009.8555625323	63211.4262944955	3448.46602119819	328
SC + 180 mM VitC + 400 mg/L PQ	SOD2	22.6666666666667	294430.045638548	159909.0699783	12374.1353442136	167
SC + 180 mM VitC + 400 mg/L PQ	wt	22.6666666666667	817392.71709453	390092.066553394	14537.8729716127	720
SC + 180 mM VitC + 400 mg/L PQ	MIP1	23	15207.8297436756	66525.6696470082	3629.27281922668	328
SC + 180 mM VitC + 400 mg/L PQ	SOD2	23	319188.381311916	168468.848236018	13036.5108723298	167
SC + 180 mM VitC + 400 mg/L PQ	wt	23	869359.878560742	403496.268403407	15037.418080292	720
SC + 180 mM VitC + 400 mg/L PQ	MIP1	23.3333333333333	16521.3991783646	69964.4269195647	3816.87240848942	328
SC + 180 mM VitC + 400 mg/L PQ	SOD2	23.3333333333333	345792.270912515	177383.554462102	13726.3515512259	167
SC + 180 mM VitC + 400 mg/L PQ	wt	23.3333333333333	923994.103209867	416928.889119296	15538.0222975703	720
SC + 180 mM VitC + 400 mg/L PQ	MIP1	23.6666666666667	18046.6066981608	73819.7172300078	4027.19573793746	328
SC + 180 mM VitC + 400 mg/L PQ	SOD2	23.6666666666667	375428.789514166	187129.697280145	14480.5307252456	167
SC + 180 mM VitC + 400 mg/L PQ	wt	23.6666666666667	984292.15153143	431698.092903054	16088.4380248041	720
SC + 180 mM VitC + 400 mg/L PQ	MIP1	24	19563.328148346	77387.2786056803	4221.82216710913	328
SC + 180 mM VitC + 400 mg/L PQ	SOD2	24	404699.90555758	196457.709967882	15202.35401836	167
SC + 180 mM VitC + 400 mg/L PQ	wt	24	1042616.63442669	444921.095730935	16581.2302446344	720
SC + 180 mM VitC + 400 mg/L PQ	MIP1	24.3333333333333	21212.5761292772	80956.3535501364	4416.53116822746	328
SC + 180 mM VitC + 400 mg/L PQ	SOD2	24.3333333333333	435729.533522384	205851.552307342	15929.2713628637	167
SC + 180 mM VitC + 400 mg/L PQ	wt	24.3333333333333	1101977.65702465	457443.63107174	17047.9175825124	720
SC + 180 mM VitC + 400 mg/L PQ	MIP1	24.6666666666667	22963.8337573948	84581.637201806	4614.30660572106	328
SC + 180 mM VitC + 400 mg/L PQ	SOD2	24.6666666666667	468127.25266527	215470.648397163	16673.6193658919	167
SC + 180 mM VitC + 400 mg/L PQ	wt	24.6666666666667	1163378.75818574	470157.416804918	17521.7324016916	720
SC + 180 mM VitC + 400 mg/L PQ	MIP1	25	24819.0651274341	88234.5388742847	4813.58872977301	328
SC + 180 mM VitC + 400 mg/L PQ	SOD2	25	501178.465544795	224648.849992408	17383.8499286201	167
SC + 180 mM VitC + 400 mg/L PQ	wt	25	1224222.76959574	482114.588796289	17967.3498915477	720
SC + 180 mM VitC + 400 mg/L PQ	MIP1	25.3333333333333	26719.1782883009	91907.0179778482	5013.93889025187	328
SC + 180 mM VitC + 400 mg/L PQ	SOD2	25.3333333333333	534312.551298252	233323.196758992	18055.0910341242	167
SC + 180 mM VitC + 400 mg/L PQ	wt	25.3333333333333	1283728.72541863	492981.653397417	18372.3414776144	720
SC + 180 mM VitC + 400 mg/L PQ	MIP1	25.6666666666667	28878.6734357541	96074.0742251409	5241.2704459466	328
SC + 180 mM VitC + 400 mg/L PQ	SOD2	25.6666666666667	570051.914241909	242311.94025547	18750.6608890106	167
SC + 180 mM VitC + 400 mg/L PQ	wt	25.6666666666667	1347185.30350049	504609.689007959	18805.6927787804	720
SC + 180 mM VitC + 400 mg/L PQ	MIP1	26	31169.3122722332	100245.985578522	5468.86686939319	328
SC + 180 mM VitC + 400 mg/L PQ	SOD2	26	606565.607912602	251172.401610913	19436.3039737919	167
SC + 180 mM VitC + 400 mg/L PQ	wt	26	1411803.69849574	516363.595618742	19243.735015162	720
SC + 180 mM VitC + 400 mg/L PQ	MIP1	26.3333333333333	33615.9451872941	104444.629528683	5697.92167555725	328
SC + 180 mM VitC + 400 mg/L PQ	SOD2	26.3333333333333	644029.127901186	259877.164885186	20109.8987793262	167
SC + 180 mM VitC + 400 mg/L PQ	wt	26.3333333333333	1476819.34730865	527667.050845135	19664.9899196093	720
SC + 180 mM VitC + 400 mg/L PQ	MIP1	26.6666666666667	36203.6871910772	108554.602760585	5922.13909745525	328
SC + 180 mM VitC + 400 mg/L PQ	SOD2	26.6666666666667	681892.475039217	268387.754223259	20768.467954562	167
SC + 180 mM VitC + 400 mg/L PQ	wt	26.6666666666667	1541753.47953623	538833.342990553	20081.1330578389	720
SC + 180 mM VitC + 400 mg/L PQ	MIP1	27	38974.8822134222	112723.067236451	6149.54747831708	328
SC + 180 mM VitC + 400 mg/L PQ	SOD2	27	721562.879420838	277227.576628517	21452.5139494284	167
SC + 180 mM VitC + 400 mg/L PQ	wt	27	1608882.34967013	549985.72067968	20496.7576348996	720
SC + 180 mM VitC + 400 mg/L PQ	MIP1	27.3333333333333	41931.5356867592	116816.722620547	6372.87468863473	328
SC + 180 mM VitC + 400 mg/L PQ	SOD2	27.3333333333333	761920.137558006	285827.306617292	22117.9810353119	167
SC + 180 mM VitC + 400 mg/L PQ	wt	27.3333333333333	1675455.34536199	560561.473582832	20890.8926749777	720
SC + 180 mM VitC + 400 mg/L PQ	MIP1	27.6666666666667	45019.5702676826	121235.614530654	6613.94500608584	328
SC + 180 mM VitC + 400 mg/L PQ	SOD2	27.6666666666667	803174.758424153	294498.622190212	22788.9875800079	167
SC + 180 mM VitC + 400 mg/L PQ	wt	27.6666666666667	1742672.72421187	570807.36825475	21272.7346245896	720
SC + 180 mM VitC + 400 mg/L PQ	MIP1	28	48360.3488809012	125844.955766103	6865.40518603019	328
SC + 180 mM VitC + 400 mg/L PQ	SOD2	28	846005.605386403	303062.490745463	23451.6796248501	167
SC + 180 mM VitC + 400 mg/L PQ	wt	28	1811457.96555501	581091.219319246	21655.9911254346	720
SC + 180 mM VitC + 400 mg/L PQ	MIP1	28.3333333333333	51941.4533637994	130775.730349819	7134.40099275211	328
SC + 180 mM VitC + 400 mg/L PQ	SOD2	28.3333333333333	890804.831170107	311643.67826788	24115.711851608	167
SC + 180 mM VitC + 400 mg/L PQ	wt	28.3333333333333	1882645.45602024	591444.5184965	22041.8358046301	720
SC + 180 mM VitC + 400 mg/L PQ	MIP1	28.6666666666667	55722.8098929794	135808.696387104	7408.97180032357	328
SC + 180 mM VitC + 400 mg/L PQ	SOD2	28.6666666666667	935256.06869241	319449.062873695	24719.7106462923	167
SC + 180 mM VitC + 400 mg/L PQ	wt	28.6666666666667	1952040.16616225	601264.358144253	22407.7996209722	720
SC + 180 mM VitC + 400 mg/L PQ	MIP1	29	59680.9175248594	140936.647927975	7688.72449194386	328
SC + 180 mM VitC + 400 mg/L PQ	SOD2	29	981008.006457575	327403.692469041	25335.2583650006	167
SC + 180 mM VitC + 400 mg/L PQ	wt	29	2023981.68117579	611854.265062518	22802.4621500494	720
SC + 180 mM VitC + 400 mg/L PQ	MIP1	29.3333333333333	63892.4634450991	145847.178458103	7956.61589499989	328
SC + 180 mM VitC + 400 mg/L PQ	SOD2	29.3333333333333	1027271.9658147	335208.213173409	25939.190308984	167
SC + 180 mM VitC + 400 mg/L PQ	wt	29.3333333333333	2095645.01281252	622406.620455002	23195.7252163883	720
SC + 180 mM VitC + 400 mg/L PQ	MIP1	29.6666666666667	68137.6521595588	150474.790016294	8209.07280276491	328
SC + 180 mM VitC + 400 mg/L PQ	SOD2	29.6666666666667	1071506.2427908	342450.18026572	26499.5905475117	167
SC + 180 mM VitC + 400 mg/L PQ	wt	29.6666666666667	2163965.09101906	632622.504001147	23576.4487173783	720
SC + 180 mM VitC + 400 mg/L PQ	MIP1	30	72724.513151656	155474.348542385	8481.82108118362	328
SC + 180 mM VitC + 400 mg/L PQ	SOD2	30	1117651.53620119	349994.433481145	27083.3823885334	167
SC + 180 mM VitC + 400 mg/L PQ	wt	30	2234320.21099126	642663.513382554	23950.6550430373	720
SC + 180 mM VitC + 400 mg/L PQ	MIP1	30.3333333333333	77594.5791328628	160531.298904699	8757.70034095675	328
SC + 180 mM VitC + 400 mg/L PQ	SOD2	30.3333333333333	1164821.251564	357820.099495836	27688.9506057555	167
SC + 180 mM VitC + 400 mg/L PQ	wt	30.3333333333333	2305575.9612263	652766.603446669	24327.17497914	720
SC + 180 mM VitC + 400 mg/L PQ	MIP1	30.6666666666667	82768.7830597873	165941.853905033	9052.87031525139	328
SC + 180 mM VitC + 400 mg/L PQ	SOD2	30.6666666666667	1213039.829621	365688.675236863	28297.8392772915	167
SC + 180 mM VitC + 400 mg/L PQ	wt	30.6666666666667	2377921.66432474	662904.739553924	24705.0010041561	720
SC + 180 mM VitC + 400 mg/L PQ	MIP1	31	88124.6995315301	171689.54896437	9366.43278764351	328
SC + 180 mM VitC + 400 mg/L PQ	SOD2	31	1261732.45662678	373175.495684675	28877.1868373244	167
SC + 180 mM VitC + 400 mg/L PQ	wt	31	2450374.85443717	672864.607922517	25076.1833828082	720
SC + 180 mM VitC + 400 mg/L PQ	MIP1	31.3333333333333	93998.1297020043	178095.520568214	9715.90718971914	328
SC + 180 mM VitC + 400 mg/L PQ	SOD2	31.3333333333333	1313453.7496071	380985.288987376	29481.5267872164	167
SC + 180 mM VitC + 400 mg/L PQ	wt	31.3333333333333	2526821.91422612	683228.910289563	25462.4381266761	720
SC + 180 mM VitC + 400 mg/L PQ	MIP1	31.6666666666667	100003.92361213	184219.724735848	10050.009917928	328
SC + 180 mM VitC + 400 mg/L PQ	SOD2	31.6666666666667	1363577.11116136	388194.154694059	30039.3655636213	167
SC + 180 mM VitC + 400 mg/L PQ	wt	31.6666666666667	2600749.12183462	693543.628956826	25846.8449951559	720
SC + 180 mM VitC + 400 mg/L PQ	MIP1	32	106339.313625	190589.411866453	10397.504839704	328
SC + 180 mM VitC + 400 mg/L PQ	SOD2	32	1414410.09466122	395077.969901906	30572.0511772517	167
SC + 180 mM VitC + 400 mg/L PQ	wt	32	2675689.42035279	704232.835550466	26245.2082046379	720
SC + 180 mM VitC + 400 mg/L PQ	MIP1	32.3333333333333	112802.035162934	196609.208686702	10725.911680145	328
SC + 180 mM VitC + 400 mg/L PQ	SOD2	32.3333333333333	1462930.48353445	401448.453693259	31065.0140132749	167
SC + 180 mM VitC + 400 mg/L PQ	wt	32.3333333333333	2746528.91071882	714259.28169715	26618.8717905833	720
SC + 180 mM VitC + 400 mg/L PQ	MIP1	32.6666666666667	120692.620540293	203784.719179965	11117.3678704465	328
SC + 180 mM VitC + 400 mg/L PQ	SOD2	32.6666666666667	1519487.71087582	409012.815113375	31650.3618738919	167
SC + 180 mM VitC + 400 mg/L PQ	wt	32.6666666666667	2828345.61836573	725779.635281334	27048.2100195678	720
SC + 180 mM VitC + 400 mg/L PQ	MIP1	33	129158.938116271	211025.956362495	11512.4097456141	328
SC + 180 mM VitC + 400 mg/L PQ	SOD2	33	1577575.18201063	416699.673932797	32245.1888678598	167
SC + 180 mM VitC + 400 mg/L PQ	wt	33	2911768.23667306	737516.291623104	27485.6093763803	720
SC + 180 mM VitC + 400 mg/L PQ	MIP1	33.3333333333333	139489.513375284	219728.014197848	11987.1459209996	328
SC + 180 mM VitC + 400 mg/L PQ	SOD2	33.3333333333333	1646269.71230018	426141.027580814	32975.7827478004	167
SC + 180 mM VitC + 400 mg/L PQ	wt	33.3333333333333	3010107.39013128	751552.750432741	28008.7173107424	720
SC + 180 mM VitC + 400 mg/L PQ	MIP1	33.6666666666667	148508.660228367	227305.917081853	12400.5544159399	328
SC + 180 mM VitC + 400 mg/L PQ	SOD2	33.6666666666667	1705079.39046794	434317.976335657	33608.5340395743	167
SC + 180 mM VitC + 400 mg/L PQ	wt	33.6666666666667	3093544.68551394	763461.62468966	28452.5348503085	720
SC + 180 mM VitC + 400 mg/L PQ	MIP1	34	156544.158671647	234129.461174963	12772.8092649225	328
SC + 180 mM VitC + 400 mg/L PQ	SOD2	34	1755975.20035104	441124.09252932	34135.2071229726	167
SC + 180 mM VitC + 400 mg/L PQ	wt	34	3166059.82949542	775584.674566054	28904.3342439458	720
SC + 180 mM VitC + 400 mg/L PQ	MIP1	34.3333333333333	163261.043509582	239606.702297201	13071.6172654247	328
SC + 180 mM VitC + 400 mg/L PQ	SOD2	34.3333333333333	1796707.14372433	446804.469748142	34574.7679091208	167
SC + 180 mM VitC + 400 mg/L PQ	wt	34.3333333333333	3225513.69647031	786812.759456997	29322.7802618339	720
SC + 180 mM VitC + 400 mg/L PQ	MIP1	34.6666666666667	169676.018462091	244943.237398294	13362.7491231574	328
SC + 180 mM VitC + 400 mg/L PQ	SOD2	34.6666666666667	1836106.86805096	451601.653711844	34945.9851493061	167
SC + 180 mM VitC + 400 mg/L PQ	wt	34.6666666666667	3282168.70119252	798459.565061388	29756.8310793697	720
SC + 180 mM VitC + 400 mg/L PQ	MIP1	35	175065.184893212	249607.594854318	13617.2106839974	328
SC + 180 mM VitC + 400 mg/L PQ	SOD2	35	1868168.71208899	456013.31899814	35287.3700585761	167
SC + 180 mM VitC + 400 mg/L PQ	wt	35	3332443.07252246	813477.069148491	30316.5004125554	720
SC + 180 mM VitC + 400 mg/L PQ	MIP1	35.3333333333333	185902.285855168	257829.331746891	14065.7432036906	328
SC + 180 mM VitC + 400 mg/L PQ	SOD2	35.3333333333333	1924665.44115659	462748.243224205	35808.5341421247	167
SC + 180 mM VitC + 400 mg/L PQ	wt	35.3333333333333	3411513.16724759	827221.931325931	30828.7411820574	720
SC + 180 mM VitC + 400 mg/L PQ	MIP1	35.6666666666667	201065.437001647	269194.235416236	14685.7495290555	328
SC + 180 mM VitC + 400 mg/L PQ	SOD2	35.6666666666667	2003119.06695009	472709.792292192	36579.3819522084	167
SC + 180 mM VitC + 400 mg/L PQ	wt	35.6666666666667	3519039.34866692	842450.445254993	31396.2743877522	720
SC + 180 mM VitC + 400 mg/L PQ	MIP1	36	214386.631390449	278785.819666016	15209.0133488075	328
SC + 180 mM VitC + 400 mg/L PQ	SOD2	36	2068087.98549714	480868.428342009	37210.7161643224	167
SC + 180 mM VitC + 400 mg/L PQ	wt	36	3606507.85652817	854597.547091662	31848.9701450256	720
SC + 180 mM VitC + 400 mg/L PQ	MIP1	36.3333333333333	228485.595692458	289023.644162091	15767.5324643424	328
SC + 180 mM VitC + 400 mg/L PQ	SOD2	36.3333333333333	2136115.57775577	490350.702278783	37944.4765512752	167
SC + 180 mM VitC + 400 mg/L PQ	wt	36.3333333333333	3697942.87796412	866329.633917676	32286.1992060405	720
SC + 180 mM VitC + 400 mg/L PQ	MIP1	36.6666666666667	244381.239225356	300128.668524429	16373.3612111846	328
SC + 180 mM VitC + 400 mg/L PQ	SOD2	36.6666666666667	2210769.88309066	500219.071618891	38708.1138975355	167
SC + 180 mM VitC + 400 mg/L PQ	wt	36.6666666666667	3793367.46012369	874527.298982059	32591.7081450528	720
SC + 180 mM VitC + 400 mg/L PQ	MIP1	37	255084.905461606	307378.350905607	16768.86380971	328
SC + 180 mM VitC + 400 mg/L PQ	SOD2	37	2258507.79847237	507287.232829122	39255.0646331129	167
SC + 180 mM VitC + 400 mg/L PQ	wt	37	3857786.18296995	886199.830781228	33026.7177212606	720
SC + 180 mM VitC + 400 mg/L PQ	MIP1	37.3333333333333	266215.010645272	314970.386028918	17183.0432815117	328
SC + 180 mM VitC + 400 mg/L PQ	SOD2	37.3333333333333	2307649.62273818	514301.401718925	39797.8373174976	167
SC + 180 mM VitC + 400 mg/L PQ	wt	37.3333333333333	3924851.58536052	898869.822567202	33498.9004363906	720
SC + 180 mM VitC + 400 mg/L PQ	MIP1	37.6666666666667	277659.282899452	323002.375111601	17621.224209517	328
SC + 180 mM VitC + 400 mg/L PQ	SOD2	37.6666666666667	2359060.07411516	521434.288255212	40349.7966491785	167
SC + 180 mM VitC + 400 mg/L PQ	wt	37.6666666666667	3993944.8666175	911482.901252405	33968.9621254851	720
SC + 180 mM VitC + 400 mg/L PQ	MIP1	38	288816.41865296	330519.763914874	18031.3313907005	328
SC + 180 mM VitC + 400 mg/L PQ	SOD2	38	2404348.67965364	527266.776913746	40801.128171925	167
SC + 180 mM VitC + 400 mg/L PQ	wt	38	4054659.79256298	923761.408152157	34426.5550603192	720
SC + 180 mM VitC + 400 mg/L PQ	MIP1	38.3333333333333	300084.748211174	338390.06811054	18460.6916849739	328
SC + 180 mM VitC + 400 mg/L PQ	SOD2	38.3333333333333	2451472.30875964	533553.015839874	41287.5719445548	167
SC + 180 mM VitC + 400 mg/L PQ	wt	38.3333333333333	4118565.61809366	937286.036496965	34930.588199476	720
SC + 180 mM VitC + 400 mg/L PQ	MIP1	38.6666666666667	311624.394429107	346062.890383898	18879.2784571359	328
SC + 180 mM VitC + 400 mg/L PQ	SOD2	38.6666666666667	2497534.27067335	540339.000776423	41812.6872245077	167
SC + 180 mM VitC + 400 mg/L PQ	wt	38.6666666666667	4181739.85215944	951100.17517454	35445.4107517038	720
SC + 180 mM VitC + 400 mg/L PQ	MIP1	39	323172.82402783	353497.887769512	19284.8908179856	328
SC + 180 mM VitC + 400 mg/L PQ	SOD2	39	2542221.65823501	547310.719560424	42352.1750210832	167
SC + 180 mM VitC + 400 mg/L PQ	wt	39	4242304.02657552	964320.348693087	35938.0975294007	720
SC + 180 mM VitC + 400 mg/L PQ	MIP1	39.3333333333333	335015.151293335	360915.692677853	19689.5652523057	328
SC + 180 mM VitC + 400 mg/L PQ	SOD2	39.3333333333333	2587271.32275294	555169.485387253	42960.3045786677	167
SC + 180 mM VitC + 400 mg/L PQ	wt	39.3333333333333	4304105.04864269	978276.760003107	36458.2222695866	720
SC + 180 mM VitC + 400 mg/L PQ	MIP1	39.6666666666667	346759.692040767	368218.634042053	20087.9733665589	328
SC + 180 mM VitC + 400 mg/L PQ	SOD2	39.6666666666667	2632380.85139848	563825.463744541	43630.1242939859	167
SC + 180 mM VitC + 400 mg/L PQ	wt	39.6666666666667	4366477.35301961	992949.355887573	37005.0376329874	720
SC + 180 mM VitC + 400 mg/L PQ	MIP1	40	358432.390739813	375654.331199909	20493.6239031142	328
SC + 180 mM VitC + 400 mg/L PQ	SOD2	40	2676368.05877976	572819.933151214	44326.137233106	167
SC + 180 mM VitC + 400 mg/L PQ	wt	40	4426481.10218258	1007829.88491891	37559.6022072414	720
SC + 180 mM VitC + 400 mg/L PQ	MIP1	40.3333333333333	369890.136626272	383093.770274487	20899.4785779626	328
SC + 180 mM VitC + 400 mg/L PQ	SOD2	40.3333333333333	2719335.79060306	582037.78573368	45039.4360813448	167
SC + 180 mM VitC + 400 mg/L PQ	wt	40.3333333333333	4484270.65618341	1022857.42930179	38119.6457201582	720
SC + 180 mM VitC + 400 mg/L PQ	MIP1	40.6666666666667	381737.080393068	390913.796363469	21326.0959766446	328
SC + 180 mM VitC + 400 mg/L PQ	SOD2	40.6666666666667	2763560.38154996	591184.064206687	45747.1963587087	167
SC + 180 mM VitC + 400 mg/L PQ	wt	40.6666666666667	4544089.92779198	1038153.89296223	38689.7112628265	720
SC + 180 mM VitC + 400 mg/L PQ	MIP1	41	393441.324321182	398745.709881771	21753.3618877633	328
SC + 180 mM VitC + 400 mg/L PQ	SOD2	41	2806275.85372722	599664.049619535	46403.39733111	167
SC + 180 mM VitC + 400 mg/L PQ	wt	41	4601118.33268715	1052787.25977552	39235.064645063	720
SC + 180 mM VitC + 400 mg/L PQ	MIP1	41.3333333333333	405192.719776164	406724.548321858	22188.6432104957	328
SC + 180 mM VitC + 400 mg/L PQ	SOD2	41.3333333333333	2848682.657157	608019.438804487	47049.956757928	167
SC + 180 mM VitC + 400 mg/L PQ	wt	41.3333333333333	4658038.43805686	1067744.37628193	39792.4834659919	720
SC + 180 mM VitC + 400 mg/L PQ	MIP1	41.6666666666667	417202.930067952	414376.503922887	22606.0916123547	328
SC + 180 mM VitC + 400 mg/L PQ	SOD2	41.6666666666667	2891603.59305864	617304.537512147	47768.459267564	167
SC + 180 mM VitC + 400 mg/L PQ	wt	41.6666666666667	4716706.07036192	1082907.03571124	40357.5624193854	720
SC + 180 mM VitC + 400 mg/L PQ	MIP1	42	428963.933331272	422010.817075561	23022.5775397491	328
SC + 180 mM VitC + 400 mg/L PQ	SOD2	42	2933719.09803235	626103.790504938	48449.3659070408	167
SC + 180 mM VitC + 400 mg/L PQ	wt	42	4773711.19794965	1097542.14751255	40902.9808334861	720
SC + 180 mM VitC + 400 mg/L PQ	MIP1	42.3333333333333	440037.215551905	429148.436406273	23411.9665976629	328
SC + 180 mM VitC + 400 mg/L PQ	SOD2	42.3333333333333	2972207.71716769	635936.036516086	49210.2079461825	167
SC + 180 mM VitC + 400 mg/L PQ	wt	42.3333333333333	4827259.33627523	1113783.34055099	41508.2543613134	720
SC + 180 mM VitC + 400 mg/L PQ	MIP1	42.6666666666667	451417.987755117	436304.034511942	23802.3364781619	328
SC + 180 mM VitC + 400 mg/L PQ	SOD2	42.6666666666667	3011815.30680487	646995.744624595	50066.0338541235	167
SC + 180 mM VitC + 400 mg/L PQ	wt	42.6666666666667	4881610.9524307	1129689.50229068	42101.0420098312	720
SC + 180 mM VitC + 400 mg/L PQ	MIP1	43	463021.363548844	443696.7303687	24205.6411014164	328
SC + 180 mM VitC + 400 mg/L PQ	SOD2	43	3053748.92276143	659174.704630007	51008.4700741527	167
SC + 180 mM VitC + 400 mg/L PQ	wt	43	4938250.2142097	1145791.55510931	42701.130087827	720
SC + 180 mM VitC + 400 mg/L PQ	MIP1	43.3333333333333	474288.15503361	451375.239610225	24624.5381231272	328
SC + 180 mM VitC + 400 mg/L PQ	SOD2	43.3333333333333	3093525.27639429	670144.813263046	51857.3625665195	167
SC + 180 mM VitC + 400 mg/L PQ	wt	43.3333333333333	4990814.8079609	1161589.39289463	43289.8807409185	720
SC + 180 mM VitC + 400 mg/L PQ	MIP1	43.6666666666667	485829.668576098	459403.967851692	25062.54115766	328
SC + 180 mM VitC + 400 mg/L PQ	SOD2	43.6666666666667	3135690.16102017	682376.512879926	52803.8799002116	167
SC + 180 mM VitC + 400 mg/L PQ	wt	43.6666666666667	5047706.05367427	1178861.65806622	43933.5800584031	720
SC + 180 mM VitC + 400 mg/L PQ	MIP1	44	497324.185996353	467626.167101867	25511.0989010283	328
SC + 180 mM VitC + 400 mg/L PQ	SOD2	44	3177168.74932921	693859.294077258	53692.4441866718	167
SC + 180 mM VitC + 400 mg/L PQ	wt	44	5102994.41510668	1195069.53212422	44537.6118611438	720
SC + 180 mM VitC + 400 mg/L PQ	MIP1	44.3333333333333	508096.997003858	475477.997007272	25939.4513401406	328
SC + 180 mM VitC + 400 mg/L PQ	SOD2	44.3333333333333	3215746.96155061	704694.053915292	54530.8630748317	167
SC + 180 mM VitC + 400 mg/L PQ	wt	44.3333333333333	5155026.18345774	1211957.65760963	45166.9951377757	720
SC + 180 mM VitC + 400 mg/L PQ	MIP1	44.6666666666667	518806.569728022	483283.188914834	26365.2594678794	328
SC + 180 mM VitC + 400 mg/L PQ	SOD2	44.6666666666667	3253739.93268586	715311.095012416	55352.4343810041	167
SC + 180 mM VitC + 400 mg/L PQ	wt	44.6666666666667	5206489.89693222	1229072.68178906	45804.8344294717	720
SC + 180 mM VitC + 400 mg/L PQ	MIP1	45	529303.678711278	490684.635524027	26769.0414838175	328
SC + 180 mM VitC + 400 mg/L PQ	SOD2	45	3292236.17688528	727346.438346725	56283.7572093654	167
SC + 180 mM VitC + 400 mg/L PQ	wt	45	5259944.99724802	1246627.46300676	46459.0624983538	720
SC + 180 mM VitC + 400 mg/L PQ	MIP1	45.3333333333333	539082.920344859	497504.017792143	27141.0692866327	328
SC + 180 mM VitC + 400 mg/L PQ	SOD2	45.3333333333333	3326296.6781473	738376.523366716	57137.290813895	167
SC + 180 mM VitC + 400 mg/L PQ	wt	45.3333333333333	5307408.92233018	1263194.21224985	47076.4687895828	720
SC + 180 mM VitC + 400 mg/L PQ	MIP1	45.6666666666667	548688.313969496	504219.412609029	27507.4241088934	328
SC + 180 mM VitC + 400 mg/L PQ	SOD2	45.6666666666667	3360123.01747246	750144.079675796	58047.891660107	167
SC + 180 mM VitC + 400 mg/L PQ	wt	45.6666666666667	5352979.38299506	1279432.8156421	47681.6458069948	720
SC + 180 mM VitC + 400 mg/L PQ	MIP1	46	558618.314535161	511452.997140015	27902.0484976923	328
SC + 180 mM VitC + 400 mg/L PQ	SOD2	46	3395802.22009837	763072.834757798	59048.3487651267	167
SC + 180 mM VitC + 400 mg/L PQ	wt	46	5401575.05785112	1296506.51878164	48317.9451544559	720
SC + 180 mM VitC + 400 mg/L PQ	MIP1	46.3333333333333	568942.896829369	519433.773728112	28337.4355550671	328
SC + 180 mM VitC + 400 mg/L PQ	SOD2	46.3333333333333	3434431.76527575	777077.008095328	60132.0242332282	167
SC + 180 mM VitC + 400 mg/L PQ	wt	46.3333333333333	5453731.78261518	1314660.12204896	48994.4900034942	720
SC + 180 mM VitC + 400 mg/L PQ	MIP1	46.6666666666667	578557.478979016	527156.062261611	28758.7209329605	328
SC + 180 mM VitC + 400 mg/L PQ	SOD2	46.6666666666667	3469014.04630876	789686.324979994	61107.7624684022	167
SC + 180 mM VitC + 400 mg/L PQ	wt	46.6666666666667	5499222.31265976	1331022.93057133	49604.2958728078	720
SC + 180 mM VitC + 400 mg/L PQ	MIP1	47	588155.659616819	535126.866370659	29193.5639470008	328
SC + 180 mM VitC + 400 mg/L PQ	SOD2	47	3504425.93539653	802971.154413124	62135.7734339631	167
SC + 180 mM VitC + 400 mg/L PQ	wt	47	5545431.93105651	1347670.84720332	50224.7270940225	720
SC + 180 mM VitC + 400 mg/L PQ	MIP1	47.3333333333333	597353.093052422	542897.258135493	29617.473571308	328
SC + 180 mM VitC + 400 mg/L PQ	SOD2	47.3333333333333	3538550.92861472	815587.824189031	63112.0806529439	167
SC + 180 mM VitC + 400 mg/L PQ	wt	47.3333333333333	5590018.06844978	1364340.98657806	50845.9865079611	720
SC + 180 mM VitC + 400 mg/L PQ	MIP1	47.6666666666667	605843.399006413	549955.451441058	30002.5295843126	328
SC + 180 mM VitC + 400 mg/L PQ	SOD2	47.6666666666667	3569339.10088735	827325.065147233	64020.3356268747	167
SC + 180 mM VitC + 400 mg/L PQ	wt	47.6666666666667	5631443.39749287	1380846.40094807	51461.1069834302	720
SC + 180 mM VitC + 400 mg/L PQ	MIP1	48	613642.971677741	556358.875592596	30351.8650114713	328
SC + 180 mM VitC + 400 mg/L PQ	SOD2	48	3596550.40761774	838637.330729494	64895.7050188897	167
SC + 180 mM VitC + 400 mg/L PQ	wt	48	5667847.08490507	1396024.23533137	52026.7514739683	720
SC + 180 mM VitC + 400 mg/L PQ	MIP1	48.3333333333333	621542.164663521	562905.20986792	30708.9968250565	328
SC + 180 mM VitC + 400 mg/L PQ	SOD2	48.3333333333333	3624305.0735872	850526.620369413	65815.7258730594	167
SC + 180 mM VitC + 400 mg/L PQ	wt	48.3333333333333	5705626.84101441	1412485.02038418	52640.2087129868	720
SC + 180 mM VitC + 400 mg/L PQ	MIP1	48.6666666666667	629538.900816072	569690.891390675	31079.1861014837	328
SC + 180 mM VitC + 400 mg/L PQ	SOD2	48.6666666666667	3653286.69060167	863006.2083491	66781.425384173	167
SC + 180 mM VitC + 400 mg/L PQ	wt	48.6666666666667	5745429.59738806	1429528.15153255	53275.3687096069	720
SC + 180 mM VitC + 400 mg/L PQ	MIP1	49	637772.009496561	577114.432981053	31484.1734974666	328
SC + 180 mM VitC + 400 mg/L PQ	SOD2	49	3684233.35804938	876622.016449675	67835.0482479681	167
SC + 180 mM VitC + 400 mg/L PQ	wt	49	5788172.66774069	1447370.8170171	53940.3255916609	720
SC + 180 mM VitC + 400 mg/L PQ	MIP1	49.3333333333333	646005.289397458	584802.147826032	31903.5727260184	328
SC + 180 mM VitC + 400 mg/L PQ	SOD2	49.3333333333333	3715392.19777755	890424.652565784	68903.128297654	167
SC + 180 mM VitC + 400 mg/L PQ	wt	49.3333333333333	5829815.16748895	1464682.33077251	54585.4876175028	720
SC + 180 mM VitC + 400 mg/L PQ	MIP1	49.6666666666667	653791.754734086	592380.813234359	32317.0228200708	328
SC + 180 mM VitC + 400 mg/L PQ	SOD2	49.6666666666667	3745254.30513523	903687.095403489	69929.4069364513	167
SC + 180 mM VitC + 400 mg/L PQ	wt	49.6666666666667	5869304.66120459	1481289.85733422	55204.4135896713	720
SC + 180 mM VitC + 400 mg/L PQ	MIP1	50	660393.27748412	598921.862905468	32673.8663348604	328
SC + 180 mM VitC + 400 mg/L PQ	SOD2	50	3771255.56577819	915301.651999101	70828.168309378	167
SC + 180 mM VitC + 400 mg/L PQ	wt	50	5904953.85893013	1498841.17196058	55858.5124663219	720
SC + 180 mM VitC + 400 mg/L PQ	MIP1	50.3333333333333	665121.552223085	603883.085560342	32944.5232200448	328
SC + 180 mM VitC + 400 mg/L PQ	SOD2	50.3333333333333	3791088.76678533	925057.999670394	71583.1371586506	167
SC + 180 mM VitC + 400 mg/L PQ	wt	50.3333333333333	5932505.23283004	1516063.98262733	56500.3687232296	720
SC + 180 mM VitC + 400 mg/L PQ	MIP1	50.6666666666667	669064.805600366	608015.540279728	33169.9671076349	328
SC + 180 mM VitC + 400 mg/L PQ	SOD2	50.6666666666667	3806535.28330302	933408.620310575	72229.3275843958	167
SC + 180 mM VitC + 400 mg/L PQ	wt	50.6666666666667	5955411.8945538	1532019.88798071	57095.0102067747	720
SC + 180 mM VitC + 400 mg/L PQ	MIP1	51	671895.088663667	611378.308748964	33353.421167812	328
SC + 180 mM VitC + 400 mg/L PQ	SOD2	51	3818257.1483818	940621.403699463	72787.4695201516	167
SC + 180 mM VitC + 400 mg/L PQ	wt	51	5973696.86759491	1547511.24835143	57672.3391209893	720
SC + 180 mM VitC + 400 mg/L PQ	MIP1	51.3333333333333	678718.054093144	618524.22999895	33743.2631325531	328
SC + 180 mM VitC + 400 mg/L PQ	SOD2	51.3333333333333	3844856.66347845	954731.735302478	73879.359761469	167
SC + 180 mM VitC + 400 mg/L PQ	wt	51.3333333333333	6010091.48366035	1567148.40645011	58404.1727942153	720
SC + 180 mM VitC + 400 mg/L PQ	MIP1	51.6666666666667	689708.923167857	629891.065505492	34363.3748482774	328
SC + 180 mM VitC + 400 mg/L PQ	SOD2	51.6666666666667	3887728.8511817	976809.977566816	75587.8254412351	167
SC + 180 mM VitC + 400 mg/L PQ	wt	51.6666666666667	6065226.93097491	1590216.03981185	59263.8527321636	720
SC + 180 mM VitC + 400 mg/L PQ	MIP1	52	700167.54142516	640582.230831875	34946.6257336993	328
SC + 180 mM VitC + 400 mg/L PQ	SOD2	52	3927870.97015197	996826.29915843	77136.7349089817	167
SC + 180 mM VitC + 400 mg/L PQ	wt	52	6117310.16193712	1609593.78563586	59986.0186807168	720
SC + 180 mM VitC + 400 mg/L PQ	MIP1	52.3333333333333	710192.745642487	651213.256642208	35526.5957395431	328
SC + 180 mM VitC + 400 mg/L PQ	SOD2	52.3333333333333	3968545.07695247	1017204.86541195	78713.6757102529	167
SC + 180 mM VitC + 400 mg/L PQ	wt	52.3333333333333	6169200.08773449	1629649.90073449	60733.4659594683	720
SC + 180 mM VitC + 400 mg/L PQ	MIP1	52.6666666666667	720054.684256211	661620.086583148	36094.3348579823	328
SC + 180 mM VitC + 400 mg/L PQ	SOD2	52.6666666666667	4008704.58818205	1037055.10128432	80249.733079185	167
SC + 180 mM VitC + 400 mg/L PQ	wt	52.6666666666667	6220804.7963193	1649650.92255908	61478.8600331223	720
SC + 180 mM VitC + 400 mg/L PQ	MIP1	53	724184.533518403	666318.380284762	36350.6477928011	328
SC + 180 mM VitC + 400 mg/L PQ	SOD2	53	4027104.96008696	1046954.44122828	81015.767002724	167
SC + 180 mM VitC + 400 mg/L PQ	wt	53	6247648.98165542	1665535.02007152	62070.8253964399	720
SC + 180 mM VitC + 400 mg/L PQ	MIP1	53.3333333333333	727606.592385562	670544.921872439	36581.2245398655	328
SC + 180 mM VitC + 400 mg/L PQ	SOD2	53.3333333333333	4041893.98224468	1055203.18030433	81654.07359634	167
SC + 180 mM VitC + 400 mg/L PQ	wt	53.3333333333333	6270119.08144371	1681518.03748355	62666.4772867542	720
SC + 180 mM VitC + 400 mg/L PQ	MIP1	53.6666666666667	730645.632588405	674411.558646605	36792.1668696573	328
SC + 180 mM VitC + 400 mg/L PQ	SOD2	53.6666666666667	4055974.62624129	1062556.42617809	82223.0848455048	167
SC + 180 mM VitC + 400 mg/L PQ	wt	53.6666666666667	6290759.08870771	1695561.36172061	63189.8410804897	720
SC + 180 mM VitC + 400 mg/L PQ	MIP1	54	736497.413421866	681845.257246249	37197.7083759235	328
SC + 180 mM VitC + 400 mg/L PQ	SOD2	54	4080853.7834827	1076089.27752741	83270.2883231587	167
SC + 180 mM VitC + 400 mg/L PQ	wt	54	6324527.47690733	1713914.83280844	63873.8345634144	720
SC + 180 mM VitC + 400 mg/L PQ	MIP1	54.3333333333333	745038.38948383	692445.279108841	37775.986977751	328
SC + 180 mM VitC + 400 mg/L PQ	SOD2	54.3333333333333	4117274.00501016	1095095.46076214	84741.0309380421	167
SC + 180 mM VitC + 400 mg/L PQ	wt	54.3333333333333	6372428.22908419	1734793.97217989	64651.9541458517	720
SC + 180 mM VitC + 400 mg/L PQ	MIP1	54.6666666666667	752552.499592305	701815.31626147	38287.1644124709	328
SC + 180 mM VitC + 400 mg/L PQ	SOD2	54.6666666666667	4149961.68453695	1112991.99135162	86125.9060532315	167
SC + 180 mM VitC + 400 mg/L PQ	wt	54.6666666666667	6414424.61214226	1752554.49642114	65313.8498045095	720
SC + 180 mM VitC + 400 mg/L PQ	MIP1	55	759982.694337663	711563.871262796	38818.9916887807	328
SC + 180 mM VitC + 400 mg/L PQ	SOD2	55	4183713.73025823	1132811.7491672	87659.6049593211	167
SC + 180 mM VitC + 400 mg/L PQ	wt	55	6457086.88239895	1771747.77091441	66029.1409124724	720
SC + 180 mM VitC + 400 mg/L PQ	MIP1	55.3333333333333	767288.089556332	721554.196867678	39364.0086328477	328
SC + 180 mM VitC + 400 mg/L PQ	SOD2	55.3333333333333	4216903.48874939	1152772.28089093	89204.1972774772	167
SC + 180 mM VitC + 400 mg/L PQ	wt	55.3333333333333	6499268.9772916	1791628.55630518	66770.0540388033	720
SC + 180 mM VitC + 400 mg/L PQ	MIP1	55.6666666666667	770934.127821192	726785.549522297	39649.4023176905	328
SC + 180 mM VitC + 400 mg/L PQ	SOD2	55.6666666666667	4235310.60056208	1164516.20471367	90112.969386992	167
SC + 180 mM VitC + 400 mg/L PQ	wt	55.6666666666667	6524388.66885985	1806669.72950971	67330.6054679144	720
SC + 180 mM VitC + 400 mg/L PQ	MIP1	56	774957.991693594	733035.73382169	39990.3778255404	328
SC + 180 mM VitC + 400 mg/L PQ	SOD2	56	4255469.53792388	1178089.37736089	91163.2930203529	167
SC + 180 mM VitC + 400 mg/L PQ	wt	56	6550501.90697628	1823823.69462924	67969.8960027633	720
SC + 180 mM VitC + 400 mg/L PQ	MIP1	56.3333333333333	779164.092695851	739465.421403234	40341.1460402707	328
SC + 180 mM VitC + 400 mg/L PQ	SOD2	56.3333333333333	4275652.44738867	1190229.04830629	92102.6889616403	167
SC + 180 mM VitC + 400 mg/L PQ	wt	56.3333333333333	6577040.50690924	1838316.74403428	68510.0200639454	720
SC + 180 mM VitC + 400 mg/L PQ	MIP1	56.6666666666667	783154.610435218	745114.630498406	40649.3356628333	328
SC + 180 mM VitC + 400 mg/L PQ	SOD2	56.6666666666667	4293796.75640816	1199451.48914328	92816.3428596735	167
SC + 180 mM VitC + 400 mg/L PQ	wt	56.6666666666667	6601974.59389199	1849892.90149353	68941.4379805644	720
SC + 180 mM VitC + 400 mg/L PQ	MIP1	57	787351.09282235	750891.481707412	40964.4887335924	328
SC + 180 mM VitC + 400 mg/L PQ	SOD2	57	4313941.34853361	1210869.26551947	93699.8769220509	167
SC + 180 mM VitC + 400 mg/L PQ	wt	57	6631007.82857475	1864890.6226319	69500.3700467806	720
SC + 180 mM VitC + 400 mg/L PQ	MIP1	57.3333333333333	791940.118089762	757117.242437823	41304.1318265185	328
SC + 180 mM VitC + 400 mg/L PQ	SOD2	57.3333333333333	4335345.87781651	1222700.58646884	94615.41202427	167
SC + 180 mM VitC + 400 mg/L PQ	wt	57.3333333333333	6660882.31849714	1879265.65639629	70036.0959247146	720
SC + 180 mM VitC + 400 mg/L PQ	MIP1	57.6666666666667	796293.444632061	762849.313843758	41616.8419587398	328
SC + 180 mM VitC + 400 mg/L PQ	SOD2	57.6666666666667	4355786.8387723	1234042.80862922	95493.0995258971	167
SC + 180 mM VitC + 400 mg/L PQ	wt	57.6666666666667	6690882.912525	1893896.47004694	70581.3541561974	720
SC + 180 mM VitC + 400 mg/L PQ	MIP1	58	800445.241834659	768473.738760625	41923.6794935272	328
SC + 180 mM VitC + 400 mg/L PQ	SOD2	58	4376626.34566535	1246084.60296374	96424.9215476419	167
SC + 180 mM VitC + 400 mg/L PQ	wt	58	6721318.20234456	1910814.87381796	71211.8658379106	720
SC + 180 mM VitC + 400 mg/L PQ	MIP1	58.3333333333333	804561.250840141	774155.057683587	42233.6208508088	328
SC + 180 mM VitC + 400 mg/L PQ	SOD2	58.3333333333333	4398469.06726827	1259207.21028623	97440.3793893984	167
SC + 180 mM VitC + 400 mg/L PQ	wt	58.3333333333333	6751991.96982516	1928122.91078371	71856.8982914523	720
SC + 180 mM VitC + 400 mg/L PQ	MIP1	58.6666666666667	808591.761603568	779831.452265875	42543.2935632823	328
SC + 180 mM VitC + 400 mg/L PQ	SOD2	58.6666666666667	4418705.29420671	1270796.55501184	98337.1898092508	167
SC + 180 mM VitC + 400 mg/L PQ	wt	58.6666666666667	6778763.37335171	1941920.4429746	72371.1019564619	720
SC + 180 mM VitC + 400 mg/L PQ	MIP1	59	812449.151005549	785507.198508574	42852.9309059315	328
SC + 180 mM VitC + 400 mg/L PQ	SOD2	59	4439385.33839854	1282560.15995237	99247.4848893846	167
SC + 180 mM VitC + 400 mg/L PQ	wt	59	6806187.02792673	1956355.44994632	72909.0629038693	720
SC + 180 mM VitC + 400 mg/L PQ	MIP1	59.3333333333333	816010.55324944	791081.42647055	43157.0299723207	328
SC + 180 mM VitC + 400 mg/L PQ	SOD2	59.3333333333333	4459112.26118122	1293680.93994783	100108.036681823	167
SC + 180 mM VitC + 400 mg/L PQ	wt	59.3333333333333	6832997.20226601	1970835.38275854	73448.6981384987	720
SC + 180 mM VitC + 400 mg/L PQ	MIP1	59.6666666666667	819408.804634971	796254.762073925	43439.2585675335	328
SC + 180 mM VitC + 400 mg/L PQ	SOD2	59.6666666666667	4477443.16067601	1304138.17096375	100917.241512633	167
SC + 180 mM VitC + 400 mg/L PQ	wt	59.6666666666667	6858455.26676095	1983604.93796993	73924.5913634171	720
SC + 180 mM VitC + 400 mg/L PQ	MIP1	60	822558.019167311	800932.327227009	43694.4406673203	328
SC + 180 mM VitC + 400 mg/L PQ	SOD2	60	4494337.87073937	1313611.31394195	101650.295324798	167
SC + 180 mM VitC + 400 mg/L PQ	wt	60	6882933.31132872	1995824.46658067	74379.9863071939	720
SC + 180 mM VitC + 400 mg/L PQ	MIP1	60.3333333333333	826085.984131546	805769.300401056	43958.3191876125	328
SC + 180 mM VitC + 400 mg/L PQ	SOD2	60.3333333333333	4513893.64184725	1325980.5397322	102607.454753293	167
SC + 180 mM VitC + 400 mg/L PQ	wt	60.3333333333333	6911757.46677029	2010696.98068945	74934.2521829198	720
SC + 180 mM VitC + 400 mg/L PQ	MIP1	60.6666666666667	829335.747688518	810080.26427917	44193.5015482039	328
SC + 180 mM VitC + 400 mg/L PQ	SOD2	60.6666666666667	4531824.95828211	1338108.04622563	103545.909381025	167
SC + 180 mM VitC + 400 mg/L PQ	wt	60.6666666666667	6939080.59619147	2024842.65687018	75461.4304083833	720
SC + 180 mM VitC + 400 mg/L PQ	MIP1	61	832184.780091898	813552.372408116	44382.9205758464	328
SC + 180 mM VitC + 400 mg/L PQ	SOD2	61	4547849.15300938	1349749.73787966	104446.770527814	167
SC + 180 mM VitC + 400 mg/L PQ	wt	61	6963295.07157816	2038837.86283507	75983.0009399934	720
SC + 180 mM VitC + 400 mg/L PQ	MIP1	61.3333333333333	834293.19135582	816325.485368138	44534.2062907269	328
SC + 180 mM VitC + 400 mg/L PQ	SOD2	61.3333333333333	4560534.89983673	1360492.98140273	105278.107670907	167
SC + 180 mM VitC + 400 mg/L PQ	wt	61.3333333333333	6983141.14691559	2054109.82117592	76552.1532233217	720
SC + 180 mM VitC + 400 mg/L PQ	MIP1	61.6666666666667	836206.566520384	819165.380297776	44689.1352607363	328
SC + 180 mM VitC + 400 mg/L PQ	SOD2	61.6666666666667	4572628.92616011	1370784.70057239	106074.504810527	167
SC + 180 mM VitC + 400 mg/L PQ	wt	61.6666666666667	7001875.86368884	2069120.28218687	77111.5600765565	720
SC + 180 mM VitC + 400 mg/L PQ	MIP1	62	837589.599157391	821452.302414865	44813.8970906175	328
SC + 180 mM VitC + 400 mg/L PQ	SOD2	62	4582605.01006416	1378591.62272827	106678.622584407	167
SC + 180 mM VitC + 400 mg/L PQ	wt	62	7015970.50696831	2080148.59824738	77522.5611497006	720
SC + 180 mM VitC + 400 mg/L PQ	MIP1	62.3333333333333	840419.326472912	826081.576254845	45066.4446832888	328
SC + 180 mM VitC + 400 mg/L PQ	SOD2	62.3333333333333	4598661.05031576	1389213.31378612	107500.553715343	167
SC + 180 mM VitC + 400 mg/L PQ	wt	62.3333333333333	7038052.95181587	2092307.73514006	77975.70542703	720
SC + 180 mM VitC + 400 mg/L PQ	MIP1	62.6666666666667	845049.63014566	833257.914194951	45457.9460145164	328
SC + 180 mM VitC + 400 mg/L PQ	SOD2	62.6666666666667	4624073.63367037	1404422.46412842	108677.473103542	167
SC + 180 mM VitC + 400 mg/L PQ	wt	62.6666666666667	7073335.84195345	2106733.06689297	78513.3058003217	720
SC + 180 mM VitC + 400 mg/L PQ	MIP1	63	849621.407859519	839917.906942148	45821.2784060866	328
SC + 180 mM VitC + 400 mg/L PQ	SOD2	63	4649053.09448114	1418420.19782359	109760.650257156	167
SC + 180 mM VitC + 400 mg/L PQ	wt	63	7109174.07227806	2119782.20760215	78999.6185615496	720
SC + 180 mM VitC + 400 mg/L PQ	MIP1	63.3333333333333	853756.276236136	845778.336799923	46140.9910659464	328
SC + 180 mM VitC + 400 mg/L PQ	SOD2	63.3333333333333	4671695.22330063	1431509.49695216	110773.530633484	167
SC + 180 mM VitC + 400 mg/L PQ	wt	63.3333333333333	7142448.27027155	2131839.26375806	79448.9585144355	720
SC + 180 mM VitC + 400 mg/L PQ	MIP1	63.6666666666667	857951.686747446	851961.653433588	46478.3186435613	328
SC + 180 mM VitC + 400 mg/L PQ	SOD2	63.6666666666667	4693423.82049722	1443900.40232712	111732.367678611	167
SC + 180 mM VitC + 400 mg/L PQ	wt	63.6666666666667	7176917.55853948	2145973.06465198	79975.6941740897	720
SC + 180 mM VitC + 400 mg/L PQ	MIP1	64	860394.150414916	855331.693839799	46662.1694204247	328
SC + 180 mM VitC + 400 mg/L PQ	SOD2	64	4707233.5475887	1452703.58108618	112413.578103003	167
SC + 180 mM VitC + 400 mg/L PQ	wt	64	7200632.88503795	2157941.13469482	80421.717810344	720
SC + 180 mM VitC + 400 mg/L PQ	MIP1	64.3333333333333	862726.560156683	858823.092708929	46852.6408442231	328
SC + 180 mM VitC + 400 mg/L PQ	SOD2	64.3333333333333	4719598.96139953	1460835.18339611	113042.820381518	167
SC + 180 mM VitC + 400 mg/L PQ	wt	64.3333333333333	7221653.56411921	2168579.92824556	80818.2022366448	720
SC + 180 mM VitC + 400 mg/L PQ	MIP1	64.6666666666667	864881.266495344	862310.467008757	47042.8927097661	328
SC + 180 mM VitC + 400 mg/L PQ	SOD2	64.6666666666667	4730319.50809194	1468225.67874151	113614.714081338	167
SC + 180 mM VitC + 400 mg/L PQ	wt	64.6666666666667	7239116.24215236	2177133.83711269	81136.9875983154	720
SC + 180 mM VitC + 400 mg/L PQ	MIP1	65	867118.411453044	866031.338389053	47245.882885378	328
SC + 180 mM VitC + 400 mg/L PQ	SOD2	65	4742380.98102315	1477052.24836964	114297.734545521	167
SC + 180 mM VitC + 400 mg/L PQ	wt	65	7258555.79969911	2186874.65887827	81500.006592058	720
SC + 180 mM VitC + 400 mg/L PQ	MIP1	65.3333333333333	869011.341840884	869239.34728637	47420.8941187357	328
SC + 180 mM VitC + 400 mg/L PQ	SOD2	65.3333333333333	4753562.13354996	1485458.13639674	114948.201690066	167
SC + 180 mM VitC + 400 mg/L PQ	wt	65.3333333333333	7276440.01228156	2195392.94179389	81817.4642529062	720
SC + 180 mM VitC + 400 mg/L PQ	MIP1	65.6666666666667	870803.591722006	872237.235749305	47584.4423426218	328
SC + 180 mM VitC + 400 mg/L PQ	SOD2	65.6666666666667	4765043.08812612	1493184.67835326	115546.099457376	167
SC + 180 mM VitC + 400 mg/L PQ	wt	65.6666666666667	7295303.49213154	2204274.60123626	82148.4641573419	720
SC + 180 mM VitC + 400 mg/L PQ	MIP1	66	872458.788894702	874860.329443719	47727.5438355934	328
SC + 180 mM VitC + 400 mg/L PQ	SOD2	66	4776576.26178823	1501122.28297606	116160.329744156	167
SC + 180 mM VitC + 400 mg/L PQ	wt	66	7314451.42006305	2213903.60017015	82507.3157601993	720
SC + 180 mM VitC + 400 mg/L PQ	MIP1	66.3333333333333	874332.901890632	877718.595381847	47883.4750262813	328
SC + 180 mM VitC + 400 mg/L PQ	SOD2	66.3333333333333	4789387.62799289	1510308.49003885	116871.179788561	167
SC + 180 mM VitC + 400 mg/L PQ	wt	66.3333333333333	7336018.06415462	2225257.05885276	82930.4341834338	720
SC + 180 mM VitC + 400 mg/L PQ	MIP1	66.6666666666667	876350.006412215	880780.809671846	48050.5325117348	328
SC + 180 mM VitC + 400 mg/L PQ	SOD2	66.6666666666667	4802452.11958727	1519482.04559281	117581.050829821	167
SC + 180 mM VitC + 400 mg/L PQ	wt	66.6666666666667	7358968.46688476	2237388.08606531	83382.5308748363	720
SC + 180 mM VitC + 400 mg/L PQ	MIP1	67	878437.278963552	883766.758236419	48213.4293607634	328
SC + 180 mM VitC + 400 mg/L PQ	SOD2	67	4815259.49505682	1528613.16648821	118287.638178615	167
SC + 180 mM VitC + 400 mg/L PQ	wt	67	7381539.2598465	2248972.45037251	83814.25464262	720
SC + 180 mM VitC + 400 mg/L PQ	MIP1	67.3333333333333	880430.024381084	886711.207588443	48374.0622421398	328
SC + 180 mM VitC + 400 mg/L PQ	SOD2	67.3333333333333	4827799.30732387	1537945.99678138	119009.83426923	167
SC + 180 mM VitC + 400 mg/L PQ	wt	67.3333333333333	7403210.89433774	2259550.21786001	84208.4647618241	720
SC + 180 mM VitC + 400 mg/L PQ	MIP1	67.6666666666667	882169.66753519	889581.232695705	48530.6349480976	328
SC + 180 mM VitC + 400 mg/L PQ	SOD2	67.6666666666667	4839336.83800883	1547407.15637682	119741.960779397	167
SC + 180 mM VitC + 400 mg/L PQ	wt	67.6666666666667	7423060.30751809	2269772.88407791	84589.4410380661	720
SC + 180 mM VitC + 400 mg/L PQ	MIP1	68	883685.320300597	892183.437352847	48672.5968506585	328
SC + 180 mM VitC + 400 mg/L PQ	SOD2	68	4850817.38166297	1555948.34303685	120402.897646491	167
SC + 180 mM VitC + 400 mg/L PQ	wt	68	7443680.08520544	2279850.21254867	84965.0008962695	720
SC + 180 mM VitC + 400 mg/L PQ	MIP1	68.3333333333333	884688.27103941	894046.408834784	48774.230277248	328
SC + 180 mM VitC + 400 mg/L PQ	SOD2	68.3333333333333	4859882.56566711	1563309.82638865	120972.546330845	167
SC + 180 mM VitC + 400 mg/L PQ	wt	68.3333333333333	7460470.92416581	2288193.9419896	85275.9533331993	720
SC + 180 mM VitC + 400 mg/L PQ	MIP1	68.6666666666667	885813.399914279	895949.378426288	48878.0457796083	328
SC + 180 mM VitC + 400 mg/L PQ	SOD2	68.6666666666667	4869689.86964365	1570340.24976137	121516.576824881	167
SC + 180 mM VitC + 400 mg/L PQ	wt	68.6666666666667	7479014.29571821	2297524.22001402	85623.672265059	720
SC + 180 mM VitC + 400 mg/L PQ	MIP1	69	886981.940867208	897648.130065553	48970.7202792971	328
SC + 180 mM VitC + 400 mg/L PQ	SOD2	69	4879552.45705651	1579046.65723161	122190.298862119	167
SC + 180 mM VitC + 400 mg/L PQ	wt	69	7498703.0857075	2307494.28713646	85995.2347288257	720
SC + 180 mM VitC + 400 mg/L PQ	MIP1	69.3333333333333	887760.132049551	898807.986119244	49033.9956145506	328
SC + 180 mM VitC + 400 mg/L PQ	SOD2	69.3333333333333	4887678.89550572	1586639.46323825	122777.847830925	167
SC + 180 mM VitC + 400 mg/L PQ	wt	69.3333333333333	7515626.94943973	2316455.33488676	86329.1932608139	720
SC + 180 mM VitC + 400 mg/L PQ	MIP1	69.6666666666667	888426.185191112	899477.104800427	49070.4990312819	328
SC + 180 mM VitC + 400 mg/L PQ	SOD2	69.6666666666667	4893008.99099846	1592316.99131775	123217.188144053	167
SC + 180 mM VitC + 400 mg/L PQ	wt	69.6666666666667	7527131.56844973	2322371.69625997	86549.6830309798	720
SC + 180 mM VitC + 400 mg/L PQ	MIP1	70	888821.536383989	899885.763305047	49092.7931804583	328
SC + 180 mM VitC + 400 mg/L PQ	SOD2	70	4895118.38128413	1593016.75122804	123271.337191631	167
SC + 180 mM VitC + 400 mg/L PQ	wt	70	7531439.11688803	2324399.82993907	86625.2671105453	720
SC + 400 mg/L PQ	MIP1	0	6233.87323833538	3618.60502764208	197.411088682352	335
SC + 400 mg/L PQ	SOD2	0	6661.06253204527	4095.51046697432	316.920114843146	166
SC + 400 mg/L PQ	wt	0	5666.60030861807	3906.55340990126	145.588649704547	720
SC + 400 mg/L PQ	MIP1	0.333333333333333	6231.7761309074	3591.94544899123	195.95668943041	335
SC + 400 mg/L PQ	SOD2	0.333333333333333	6661.21701759625	4101.53205825309	317.38607956598	166
SC + 400 mg/L PQ	wt	0.333333333333333	5638.83929637513	3888.93806163447	144.932164435016	720
SC + 400 mg/L PQ	MIP1	0.666666666666667	6270.28732690063	3632.04144318343	198.144105245294	335
SC + 400 mg/L PQ	SOD2	0.666666666666667	6658.34792814684	4117.85423481983	318.649127509266	166
SC + 400 mg/L PQ	wt	0.666666666666667	5555.65730306742	3832.09544674571	142.813765253181	720
SC + 400 mg/L PQ	MIP1	1	6340.9729478237	3948.56277326993	215.411759461836	335
SC + 400 mg/L PQ	SOD2	1	6664.15426629946	4131.11809004784	319.675515442107	166
SC + 400 mg/L PQ	wt	1	5454.32677421182	3766.94280040832	140.385669484441	720
SC + 400 mg/L PQ	MIP1	1.33333333333333	6571.15260935135	6554.44023049621	357.574029694199	335
SC + 400 mg/L PQ	SOD2	1.33333333333333	6678.76923141741	4153.89274768467	321.437871361346	166
SC + 400 mg/L PQ	wt	1.33333333333333	5353.70302049259	3698.75704823053	137.844536534999	720
SC + 400 mg/L PQ	MIP1	1.66666666666667	6924.25246713533	11694.4478037225	637.984431800813	335
SC + 400 mg/L PQ	SOD2	1.66666666666667	6702.12687421805	4165.51188747761	322.33698739273	166
SC + 400 mg/L PQ	wt	1.66666666666667	5277.68560293937	3647.83698629116	135.94685786975	720
SC + 400 mg/L PQ	MIP1	2	7382.17745968564	18634.8804368852	1016.61607343426	335
SC + 400 mg/L PQ	SOD2	2	6726.95351847138	4167.03517145267	322.454862645694	166
SC + 400 mg/L PQ	wt	2	5240.64121456587	3624.24641797733	135.06768929679	720
SC + 400 mg/L PQ	MIP1	2.33333333333333	7873.84106463048	25937.86399415	1415.02648950788	335
SC + 400 mg/L PQ	SOD2	2.33333333333333	6754.23971759992	4163.2234755698	322.159904762743	166
SC + 400 mg/L PQ	wt	2.33333333333333	5249.40839979495	3632.46262428537	135.373889227156	720
SC + 400 mg/L PQ	MIP1	2.66666666666667	8430.99270528066	33792.278907829	1843.51995238317	335
SC + 400 mg/L PQ	SOD2	2.66666666666667	6772.77234649696	4160.30105729116	321.933761246823	166
SC + 400 mg/L PQ	wt	2.66666666666667	5297.24464568269	3666.69932388436	136.649815687632	720
SC + 400 mg/L PQ	MIP1	3	8958.67680219418	39874.1893936323	2175.31537108721	335
SC + 400 mg/L PQ	SOD2	3	6788.48738630687	4153.10036136789	321.37655466724	166
SC + 400 mg/L PQ	wt	3	5397.6747312321	3739.82068854259	139.374888054022	720
SC + 400 mg/L PQ	MIP1	3.33333333333333	9497.61706322538	44839.029691538	2446.16961487911	335
SC + 400 mg/L PQ	SOD2	3.33333333333333	6802.74364995426	4140.90420392615	320.432787669633	166
SC + 400 mg/L PQ	wt	3.33333333333333	5560.41315890242	3835.98023979763	142.958542942224	720
SC + 400 mg/L PQ	MIP1	3.66666666666667	10056.8718009613	48736.4310528063	2658.79029049383	335
SC + 400 mg/L PQ	SOD2	3.66666666666667	6818.85362660397	4127.08198640028	319.363192364967	166
SC + 400 mg/L PQ	wt	3.66666666666667	5822.92776615124	4004.25489887599	149.229769218721	720
SC + 400 mg/L PQ	MIP1	4	10687.4858131076	52637.2922199639	2871.59971399398	335
SC + 400 mg/L PQ	SOD2	4	6836.28731496906	4116.45988956816	318.541229834275	166
SC + 400 mg/L PQ	wt	4	6192.42156874751	4250.4596391175	158.405278144766	720
SC + 400 mg/L PQ	MIP1	4.33333333333333	11378.2383079605	56491.0451850145	3081.839174375	335
SC + 400 mg/L PQ	SOD2	4.33333333333333	6860.39101865113	4107.77643907831	317.869284261515	166
SC + 400 mg/L PQ	wt	4.33333333333333	6685.51539303471	4585.89347755728	170.906159223183	720
SC + 400 mg/L PQ	MIP1	4.66666666666667	12103.7774801934	60130.2161368558	3280.37222620472	335
SC + 400 mg/L PQ	SOD2	4.66666666666667	6886.02870933638	4103.60765754149	317.546694261059	166
SC + 400 mg/L PQ	wt	4.66666666666667	7276.82209482854	4987.72681583045	185.881603556591	720
SC + 400 mg/L PQ	MIP1	5	12905.7910919083	63693.276364797	3474.753097636	335
SC + 400 mg/L PQ	SOD2	5	6917.51417460308	4107.74892924078	317.867155486374	166
SC + 400 mg/L PQ	wt	5	7963.88380602323	5462.08369830906	203.559840803542	720
SC + 400 mg/L PQ	MIP1	5.33333333333333	13777.9536541429	66838.805840747	3646.35579911523	335
SC + 400 mg/L PQ	SOD2	5.33333333333333	6949.47579482701	4115.7307561736	318.484807798242	166
SC + 400 mg/L PQ	wt	5.33333333333333	8701.32592676323	5968.87259438847	222.446747834802	720
SC + 400 mg/L PQ	MIP1	5.66666666666667	14768.4838581416	69121.0601903516	3770.86298140339	335
SC + 400 mg/L PQ	SOD2	5.66666666666667	6984.6198763428	4124.32782996542	319.150069341434	166
SC + 400 mg/L PQ	wt	5.66666666666667	9510.49541796641	6529.40095838096	243.336406588202	720
SC + 400 mg/L PQ	MIP1	6	15811.3928636272	70606.9164960141	3851.92308845727	335
SC + 400 mg/L PQ	SOD2	6	7017.20483668157	4135.27745749939	319.997376958772	166
SC + 400 mg/L PQ	wt	6	10284.3977200662	7068.32112451771	263.420775353656	720
SC + 400 mg/L PQ	MIP1	6.33333333333333	16976.7988011616	71217.3427886143	3885.22457288622	335
SC + 400 mg/L PQ	SOD2	6.33333333333333	7049.1321692417	4146.04147188005	320.830321399081	166
SC + 400 mg/L PQ	wt	6.33333333333333	11069.1138910771	7614.55599824064	283.777747175747	720
SC + 400 mg/L PQ	MIP1	6.66666666666667	18273.4521265025	71386.216922224	3894.43741217416	335
SC + 400 mg/L PQ	SOD2	6.66666666666667	7072.34372006691	4155.43012607857	321.556837273185	166
SC + 400 mg/L PQ	wt	6.66666666666667	11830.9360599252	8141.26415180036	303.407001103463	720
SC + 400 mg/L PQ	MIP1	7	19754.4428214116	71775.6345475509	3915.68188532904	335
SC + 400 mg/L PQ	SOD2	7	7097.88237923198	4166.62503433816	322.423125282921	166
SC + 400 mg/L PQ	wt	7	12577.066845539	8651.16187820059	322.409767400188	720
SC + 400 mg/L PQ	MIP1	7.33333333333333	21379.649797607	72455.9318641067	3952.79514661704	335
SC + 400 mg/L PQ	SOD2	7.33333333333333	7120.55003405152	4178.17997244394	323.317273238596	166
SC + 400 mg/L PQ	wt	7.33333333333333	13270.9266556939	9128.36588528812	340.194110716571	720
SC + 400 mg/L PQ	MIP1	7.66666666666667	23239.5136758124	73334.7937781499	4000.74099478986	335
SC + 400 mg/L PQ	SOD2	7.66666666666667	7143.30901153216	4190.01848047922	324.23336449422	166
SC + 400 mg/L PQ	wt	7.66666666666667	13999.7515235616	9630.21109734051	358.896777522104	720
SC + 400 mg/L PQ	MIP1	8	25265.1344272989	74563.8515167329	4067.79159146282	335
SC + 400 mg/L PQ	SOD2	8	7170.78205252846	4207.35239138178	325.574702790928	166
SC + 400 mg/L PQ	wt	8	14701.4681015469	10115.0427856076	376.965387732289	720
SC + 400 mg/L PQ	MIP1	8.33333333333333	27622.0553448703	77806.2996870252	4244.681641193	335
SC + 400 mg/L PQ	SOD2	8.33333333333333	7207.13702056372	4229.0692344672	327.255202562607	166
SC + 400 mg/L PQ	wt	8.33333333333333	15446.8096363034	10631.5834330393	396.215721078941	720
SC + 400 mg/L PQ	MIP1	8.66666666666667	30131.0689079264	80982.0290017573	4417.93187894836	335
SC + 400 mg/L PQ	SOD2	8.66666666666667	7247.22626236873	4252.68195746131	329.082409926231	166
SC + 400 mg/L PQ	wt	8.66666666666667	16204.2361598269	11162.6477635107	416.007320134931	720
SC + 400 mg/L PQ	MIP1	9	32805.9016954182	83764.3254555534	4569.71859448798	335
SC + 400 mg/L PQ	SOD2	9	7293.73488131018	4279.40012665651	331.149923931634	166
SC + 400 mg/L PQ	wt	9	17014.2187994827	11723.1614514367	436.896431943626	720
SC + 400 mg/L PQ	MIP1	9.33333333333333	35647.766911637	86333.0972620209	4709.85658551423	335
SC + 400 mg/L PQ	SOD2	9.33333333333333	7347.4503331144	4306.98149820014	333.284234540195	166
SC + 400 mg/L PQ	wt	9.33333333333333	17882.4080963819	12329.4154193707	459.490183342448	720
SC + 400 mg/L PQ	MIP1	9.66666666666667	38648.9153183814	88561.3462870432	4831.41753580442	335
SC + 400 mg/L PQ	SOD2	9.66666666666667	7406.96314964405	4331.06400712053	335.147795030226	166
SC + 400 mg/L PQ	wt	9.66666666666667	18816.8365922028	12977.199982795	483.631688652312	720
SC + 400 mg/L PQ	MIP1	10	41678.195860601	88484.6984715145	4827.23605465546	335
SC + 400 mg/L PQ	SOD2	10	7470.12929164567	4353.68774491963	336.898472421796	166
SC + 400 mg/L PQ	wt	10	19805.7816009623	13661.2753568705	509.125672621753	720
SC + 400 mg/L PQ	MIP1	10.3333333333333	44798.8554312961	88369.2922396268	4820.9401285448	335
SC + 400 mg/L PQ	SOD2	10.3333333333333	7534.44272665685	4377.87226864203	338.769927054213	166
SC + 400 mg/L PQ	wt	10.3333333333333	20818.5580007893	14348.6723021811	534.743444242422	720
SC + 400 mg/L PQ	MIP1	10.6666666666667	48059.4914902402	88436.0956070489	4824.58455101968	335
SC + 400 mg/L PQ	SOD2	10.6666666666667	7600.43125721324	4401.93100500076	340.631647968193	166
SC + 400 mg/L PQ	wt	10.6666666666667	21863.6265023574	15053.6111847392	561.014965265466	720
[truncated: 534 more rows]
