# Supplementary material for: Genetically controlled mtDNA deletions prevent ROS damage by arresting oxidative phosphorylation
Source: eLife. 2022 Jul 8;11:e76095. doi: 10.7554/eLife.76095 (PMC9427111; doi:10.7554/eLife.76095)
Supplement: Figure 1—figure supplement 1—source data 3. — Data are shown in Figure 1—figure supplement 1A. [file elife-76095-fig1-figsupp1-data3.xlsx]

## Sheet: dose_response_data.csv
README: Dose response founder strain
Strain	PQ concentration (µg/mL)	N	Mean doubling time (absnorm)	S.D doubling time (absnorm)	S.E.M doubling time (absnorm)
Founder	0	144	2.244107290769064	0.1240918032069137	0.01034098360057614
Founder	0	144	2.2545628566055442	0.1863856736355825	0.015532139469631875
Founder	1	138	2.3045507998518016	0.41392595921712383	0.03449382993476032
Founder	1	144	2.2661124676652857	0.08087848853380598	0.006739874044483832
Founder	5	124	2.9818187570113217	0.2365301416588232	0.019710845138235265
Founder	5	144	2.9576247762975845	0.14807623039472315	0.012339685866226928
Founder	25	144	3.4559252149908817	0.10662292221706628	0.008885243518088856
Founder	25	144	3.574411460367327	0.5031755165281365	0.04193129304401138
Founder	50	135	3.5565764567695677	0.7247256947525436	0.060393807896045294
Founder	50	144	3.432122989607278	0.14177998336730618	0.011814998613942182
Founder	100	122	3.3850537647462056	0.2794978675715718	0.02329148896429765
Founder	100	142	3.4306780228724496	0.18145159201079297	0.015120966000899414
Founder	200	144	5.343558664366866	0.24752959422882082	0.020627466185735067
Founder	200	144	5.302130204283131	0.23980890042536998	0.0199840750354475
Founder	400	144	7.3099008760118895	0.4540987909582886	0.03784156591319072
Founder	400	144	7.125088821080062	0.5687870250207033	0.04739891875172528
