# Supplementary material for: Genetically controlled mtDNA deletions prevent ROS damage by arresting oxidative phosphorylation
Source: eLife. 2022 Jul 8;11:e76095. doi: 10.7554/eLife.76095 (PMC9427111; doi:10.7554/eLife.76095)
Supplement: Figure 1—figure supplement 2—source data 1. [file elife-76095-fig1-figsupp2-data1.xlsx]

## Sheet: Data S8 - Deletion collection
Environment	ORF	Gene	N	Generation time Dnorm	SD Dnorm	SEM Dnorm
Paraquat	YAL002W	VPS8	6	0.4778442276685	0.0991478451987482	0.0404769383055647
Paraquat	YAL004W		6	0.288856065543333	0.074056674394809	0.0302335107191197
Paraquat	YAL005C	SSA1	6	0.450346560696833	0.0567212704134021	0.0231563616792099
Paraquat	YAL007C	ERP2	6	0.0219335906393667	0.0923504108675213	0.0377018973603009
Paraquat	YAL008W	FUN14	6	0.314813491980667	0.129226977822641	0.0527566927779047
Paraquat	YAL010C	MDM10	6	0.8035760268085	0.0385286433091334	0.0157292527648456
Paraquat	YAL011W	SWC3	6	0.158088758869833	0.0415696352704436	0.0169707325343649
Paraquat	YAL013W	DEP1	6	-0.0664109429721433	0.0782215161389722	0.0319338002412269
Paraquat	YAL014C	SYN8	6	0.7221972013325	0.0985006125182685	0.0402127066702265
Paraquat	YAL015C	NTG1	6	0.0473447982056483	0.096634252641554	0.0394507684411674
Paraquat	YAL017W	PSK1	6	0.0964770486793667	0.0643739951927691	0.0262805734877769
Paraquat	YAL018C	LDS1	6	0.587561203731333	0.122973878120422	0.0502038755143736
Paraquat	YAL019W	FUN30	6	0.3932587737885	0.0988703089826841	0.0403636346198147
Paraquat	YAL020C	ATS1	6	0.218432089579667	0.0481725853655988	0.0196663756227302
Paraquat	YAL022C	FUN26	6	0.0612031258750333	0.0511831870944458	0.0208954486317996
Paraquat	YAL023C	PMT2	6	-0.2166402641375	0.0403214073071668	0.016461145602248
Paraquat	YAL024C	LTE1	6	0.3515221821455	0.0516987975152299	0.02110594570463
Paraquat	YAL026C	DRS2	6	0.276794732140833	0.028324956614229	0.0115636151152221
Paraquat	YAL027W	SAW1	6	0.614679555086833	0.136553607927503	0.0557477769930759
Paraquat	YAL028W	FRT2	6	0.706034199315667	0.185560280661882	0.075754667358208
Paraquat	YAL029C	MYO4	6	0.014646305119115	0.0286848169110209	0.0117105274661932
Paraquat	YAL030W	SNC1	6	0.01273731543465	0.121326653609039	0.0495313989235913
Paraquat	YAL031C	GIP4	6	0.0835865293778267	0.0922599313954988	0.0376649592705257
Paraquat	YAL034C	FUN19	6	0.01428885719404	0.0565927985545595	0.0231039132624647
Paraquat	YAL035W	FUN12	8	0.575710276266375	0.0614939676767551	0.0217414007731499
Paraquat	YAL036C	RBG1	6	0.0861879920570333	0.0525271033509732	0.0214441001460534
Paraquat	YAL037W		6	-0.024787265024451	0.0317886991065653	0.0129776820663254
Paraquat	YAL039C	CYC3	8	0.0052627790719375	0.105722106366953	0.0373784091666989
Paraquat	YAL040C	CLN3	6	0.0242670728133583	0.0413918184492173	0.0168981391210836
Paraquat	YAL042W	ERV46	6	0.0194563691883833	0.0336878654788433	0.0137530134911144
Paraquat	YAL043C-A	NA	6	0.00888260827584233	0.0507306931746957	0.0207107187626163
Paraquat	YAL044C	GCV3	8	0.3107556863605	0.0631108880201511	0.0223130684428768
Paraquat	YAL045C		6	-0.019835121620785	0.0377892339300803	0.0154273901498943
Paraquat	YAL046C	AIM1	6	0.157843804011833	0.036012845498385	0.0147021826094549
Paraquat	YAL048C	GEM1	6	-0.051043692011785	0.0335811384006526	0.0137094423438968
Paraquat	YAL049C	AIM2	6	-0.0351512087175	0.0239803980484088	0.00978995650790585
Paraquat	YAL051W	OAF1	6	0.0933397151731	0.0632023544367382	0.0258022531520895
Paraquat	YAL053W	FLC2	6	0.654054804924167	0.0913865740355901	0.0373084126213789
Paraquat	YAL054C	ACS1	6	0.0314794124435167	0.0852350394684286	0.0347970591506059
Paraquat	YAL055W	PEX22	6	0.0759684863858	0.0418183772589957	0.0170722810259579
Paraquat	YAL056W	GPB2	6	0.132191270842167	0.0572920369307376	0.0233893761341662
Paraquat	YAL058C-A	NA	6	0.762547867615833	0.0524882472859418	0.0214282372239302
Paraquat	YAL058W	CNE1	6	-0.00558273748806333	0.0140563909575007	0.00573849757849137
Paraquat	YAL059W	ECM1	6	-0.00307507371581667	0.0410486506250535	0.0167580414435265
Paraquat	YAL060W	BDH1	6	-0.0182747978184317	0.0295428718886376	0.0120608269439292
Paraquat	YAL061W	BDH2	6	0.8144813816685	0.0385034344790772	0.0157189613030706
Paraquat	YAL062W	GDH3	6	-0.01325342339305	0.0411058790548383	0.0167814048521521
Paraquat	YAL064C-A	TDA8	6	0.006769753570315	0.0228953662932073	0.00934699414874582
Paraquat	YAL065C		6	0.0464596132573167	0.0518937201139912	0.0211855225223471
Paraquat	YAL066W		6	-0.000915317554916666	0.054523919334068	0.0222592968575228
Paraquat	YAL067C	SEO1	6	0.6476973222045	0.118326063261183	0.0483064130436968
Paraquat	YAL068C	PAU8	6	0.0466134473290317	0.0598651314920209	0.0244398375900119
Paraquat	YAR002C-A	ERP1	6	0.673176444217333	0.061568138579771	0.0251350873222337
Paraquat	YAR002W	NUP60	6	0.0481889861702167	0.0225388431750562	0.0092014441952498
Paraquat	YAR003W	SWD1	6	0.406208820768833	0.0189706574670144	0.00774473847988416
Paraquat	YAR014C	BUD14	6	-0.0335360107850333	0.0484930654135985	0.0197972110544539
Paraquat	YAR015W	ADE1	6	0.184808663275333	0.0691579632186896	0.0282336202559928
Paraquat	YAR018C	KIN3	6	0.445432805966167	0.118639601009464	0.0484344142934287
Paraquat	YAR020C	PAU7	6	0.0612712626184915	0.0409079442059533	0.0167005982884715
Paraquat	YAR023C		6	0.0243193750291333	0.0425958208287211	0.0173896710342304
Paraquat	YAR027W	UIP3	6	0.0362262578660783	0.0547083397537055	0.0223345861785665
Paraquat	YAR028W		6	-0.0875073578071333	0.0426659391893746	0.0174182967350973
Paraquat	YAR029W		6	0.621691927769333	0.0810375428797369	0.0330834383440446
Paraquat	YAR030C		6	0.300992473652667	0.0515614171471878	0.0210498604042335
Paraquat	YAR031W	PRM9	6	0.191200735467667	0.0599805672180421	0.0244869640278185
Paraquat	YAR035W	YAT1	6	-0.00568590520532333	0.0188648852698591	0.0077015571612169
Paraquat	YAR037W	NA	6	0.130531897589483	0.077695625230345	0.0317191061768093
Paraquat	YAR040C	NA	6	0.986705184212833	0.111996950640811	0.0457225636362767
Paraquat	YAR042W	SWH1	6	-0.0577859933933667	0.0575601260105901	0.023498823042708
Paraquat	YAR043C		6	0.100076950694517	0.0260971834708139	0.0106541305378816
Paraquat	YAR044W		6	0.6907868352945	0.0547958164312184	0.0223702983826166
Paraquat	YAR047C		6	0.0775944670967417	0.0613590057379826	0.0250497091970937
Paraquat	YAR050W	FLO1	6	0.271431714816333	0.107774624364754	0.043998806152296
Paraquat	YBL001C	ECM15	6	0.13578103832115	0.0424351843176585	0.017324091453203
Paraquat	YBL002W	HTB2	8	-0.029595940380825	0.0568530711750187	0.0201005960795686
Paraquat	YBL003C	HTA2	6	0.580120995168	0.147747565609147	0.0603176910801316
Paraquat	YBL005W	PDR3	6	0.0128432088709367	0.0638261534566027	0.0260569180355422
Paraquat	YBL006C	LDB7	16	0.0326166178777506	0.0594352435585254	0.0148588108896314
Paraquat	YBL007C	SLA1	6	0.34344930355635	0.193703876468154	0.0790792764243472
Paraquat	YBL008W	HIR1	6	0.6255516020265	0.0730168568724445	0.02980900699322
Paraquat	YBL009W	ALK2	6	0.674542709429667	0.077863943513039	0.031787821827973
Paraquat	YBL010C		6	0.1218692860476	0.0406562250894404	0.016597834389478
Paraquat	YBL011W	SCT1	6	0.6477666041725	0.0899588264453455	0.0367255371084476
Paraquat	YBL012C		13	0.521707696091692	0.482569265487882	0.133840633129196
Paraquat	YBL013W	FMT1	6	0.083707658246205	0.0936062787640749	0.0382146032821174
Paraquat	YBL015W	ACH1	6	0.182395686855733	0.0772003719276505	0.0315169198626377
Paraquat	YBL016W	FUS3	6	0.624082088066833	0.0822087629084702	0.033561586918532
Paraquat	YBL017C	PEP1	6	0.175942091985517	0.104190212859693	0.0425354762830356
Paraquat	YBL019W	APN2	6	0.0793415383008667	0.0445429466840507	0.0181845818359867
Paraquat	YBL021C	HAP3	6	0.288637806678833	0.043516563886868	0.0177655628136754
Paraquat	YBL022C	PIM1	8	0.25526051135825	0.0483386524315533	0.0170902944638855
Paraquat	YBL024W	NCL1	6	0.15641622812305	0.0399570169369723	0.0163123838565546
Paraquat	YBL025W	RRN10	6	0.3008610638734	0.181802779844051	0.074220674072912
Paraquat	YBL027W	RPL19B	6	0.205941328687667	0.0283914531386629	0.011590762207644
Paraquat	YBL028C		6	0.668042026854333	0.152680145916758	0.0623314085582898
Paraquat	YBL029W		6	0.161956985938333	0.040202333514683	0.0164125339300274
Paraquat	YBL031W	SHE1	6	0.677983416037333	0.110954984224474	0.0452971826280862
Paraquat	YBL032W	HEK2	6	0.638962889675833	0.110203397896844	0.0449903487946954
Paraquat	YBL036C		6	-0.0723904828333717	0.0534671429920765	0.0218278697225021
Paraquat	YBL037W	APL3	6	0.0301857728671333	0.0450338307848011	0.018384984430934
Paraquat	YBL038W	MRPL16	16	0.100510992207676	0.156654784770737	0.0391636961926842
Paraquat	YBL039C	URA7	6	0.719845855717333	0.124427340633367	0.0507972491005366
Paraquat	YBL042C	FUI1	6	-0.0562471503866667	0.025524249327975	0.0104202311535192
Paraquat	YBL043W	ECM13	6	0.0224339566975017	0.027599289838427	0.0112673628945545
Paraquat	YBL046W	PSY4	6	-0.00853488313711833	0.0303664915813793	0.0123970682754834
Paraquat	YBL047C	EDE1	6	0.996685247844	0.108227279974353	0.0441836020310833
Paraquat	YBL048W	RRT1	6	0.729957421075833	0.162570571564939	0.0663691579211196
Paraquat	YBL049W	MOH1	6	0.131052911250067	0.0334075592723604	0.0136385789615113
Paraquat	YBL051C	PIN4	6	1.007599811249	0.174224112773399	0.0711266961973233
Paraquat	YBL052C	SAS3	6	0.682340020888833	0.162552535218165	0.0663617946133826
Paraquat	YBL053W		6	0.0168011812857283	0.0344530765554341	0.0140654096049766
Paraquat	YBL054W	TOD6	6	0.0383961728042967	0.028827197263526	0.011768654001699
Paraquat	YBL055C		6	0.0178708873100333	0.0586078432723194	0.0239265518236984
Paraquat	YBL056W	PTC3	6	0.329792338250167	0.0318729072968221	0.0130120599160408
Paraquat	YBL057C	PTH2	6	0.688060204361	0.105703526570586	0.0431532840184432
Paraquat	YBL059W		6	0.10686670918965	0.0148493550954065	0.00606222383219057
Paraquat	YBL060W	YEL1	6	0.773695542287667	0.100860150652151	0.0411759840796682
Paraquat	YBL061C	SKT5	6	0.117603578761333	0.0115890748288669	0.00473121998694271
Paraquat	YBL062W		6	0.0759441154077333	0.0378942058048466	0.0154702447383144
Paraquat	YBL063W	KIP1	6	0.734941729569333	0.167681950662277	0.0684558696995205
Paraquat	YBL064C	PRX1	6	0.175492712587	0.0608922574593947	0.0248591600102833
Paraquat	YBL065W		6	0.3501959399555	0.10300685070073	0.0420523707046394
Paraquat	YBL066C	SEF1	6	0.692739232841667	0.140762561377969	0.0574660750438704
Paraquat	YBL067C	UBP13	6	0.938390354107833	0.128827264273631	0.0525935104048462
Paraquat	YBL068W	PRS4	6	0.743596304279833	0.0508258316005073	0.0207495588623113
Paraquat	YBL069W	AST1	6	0.934654311178667	0.107205790011445	0.0437665805000002
Paraquat	YBL070C		6	0.661527203649833	0.0943476279799042	0.0385172578321164
Paraquat	YBL071C		6	0.590032763353333	0.0323262517412605	0.0131971370104741
Paraquat	YBL072C	RPS8A	6	0.160895069902833	0.0345952098960045	0.0141234352982823
Paraquat	YBL075C	SSA3	6	0.0501320556290317	0.0363940064411451	0.0148577909127283
Paraquat	YBL078C	ATG8	6	0.00691997015980333	0.0456874235383693	0.0186518125552377
Paraquat	YBL079W	NUP170	6	-0.0887920504133667	0.0340244365913068	0.0138904180723971
Paraquat	YBL081W		6	0.143982313677983	0.102725370766402	0.04193745700265
Paraquat	YBL082C	ALG3	6	0.134931796108117	0.05604636964132	0.0228808345927746
Paraquat	YBL083C		6	0.115026796502117	0.0401590116688188	0.0163948478605136
Paraquat	YBL085W	BOI1	6	0.0321602811990933	0.0385368890489473	0.0157326190740283
Paraquat	YBL086C		6	0.4949997339515	0.0540966934903223	0.0220848826371717
Paraquat	YBL087C	RPL23A	6	0.467193399724333	0.0523435079398253	0.0213691476333153
Paraquat	YBL088C	TEL1	6	0.299933983657	0.0321025687475237	0.0131058188106752
Paraquat	YBL089W	AVT5	6	0.319793798020667	0.0817216481563826	0.0333627231537325
Paraquat	YBL090W	MRP21	8	-0.070942705001975	0.038830548356605	0.0137286720300738
Paraquat	YBL091C	MAP2	6	0.649543094855	0.165742362995072	0.0676640363501793
Paraquat	YBL091C-A	SCS22	6	0.5834309232695	0.137245218129316	0.0560301256756332
Paraquat	YBL093C	ROX3	6	0.521804657875417	0.245782049404995	0.100340101496294
Paraquat	YBL094C		6	0.158976331504588	0.120410342696805	0.0491573165601385
Paraquat	YBL095W	MRX3	6	0.0181353936237333	0.0626615024830708	0.0255814512666108
Paraquat	YBL096C		6	0.689446182233833	0.152565960911855	0.0622847927252416
Paraquat	YBL098W	BNA4	6	0.833784416162667	0.123074924348313	0.050245127464168
Paraquat	YBL099W	ATP1	8	1.02599890464613	0.0602099198980108	0.0212874213272911
Paraquat	YBL100C		6	0.127526611737683	0.0532894831939709	0.0217553404136414
Paraquat	YBL101C	ECM21	6	0.0771050776683833	0.0428335586520984	0.0174867270942028
Paraquat	YBL102W	SFT2	6	0.7471401147865	0.0594543999518222	0.0242721571408862
Paraquat	YBL103C	RTG3	12	0.288076362678	0.129276827047868	0.0373190054480337
Paraquat	YBL104C	SEA4	6	0.5345425031535	0.0517707130760137	0.0211353051093778
Paraquat	YBL106C	SRO77	6	0.685090153653333	0.131220255504293	0.0535704449838589
Paraquat	YBL107C	MIX23	6	0.119559510064467	0.051050223427267	0.02084116644198
Paraquat	YBR001C	NTH2	6	1.168866628505	0.0863034230447277	0.0352332249191897
Paraquat	YBR003W	COQ1	8	0.071186128110625	0.0242221893616899	0.0085638371764178
Paraquat	YBR005W	RCR1	6	0.402566788597	0.133916396748745	0.0546711400377556
Paraquat	YBR006W	UGA2	6	0.732069102251	0.115110358973937	0.0469936072657913
Paraquat	YBR007C	DSF2	6	0.5964066528115	0.142587904584577	0.0582112682874781
Paraquat	YBR008C	FLR1	6	0.0119941089573167	0.0273583793704686	0.0111690116078556
Paraquat	YBR009C	HHF1	6	0.5461835216995	0.127136384941475	0.0519032118081128
Paraquat	YBR010W	HHT1	6	0.5013091054315	0.14985985256115	0.0611800286172559
Paraquat	YBR012C		6	6.36402533500003e-05	0.0715800357728737	0.0292224272356178
Paraquat	YBR013C		6	0.630562497523333	0.0890739447620394	0.0363642856739752
Paraquat	YBR014C	GRX7	6	0.802338629136833	0.0891941987149229	0.0364133791446614
Paraquat	YBR015C	MNN2	6	-0.0980920174740833	0.0433880073885017	0.0177130798429893
Paraquat	YBR016W		6	-0.12315282356115	0.0344308014456619	0.0140563158294922
Paraquat	YBR018C	GAL7	6	0.551192325723833	0.0994022337472763	0.0405807919956149
Paraquat	YBR019C	GAL10	6	0.695290689225833	0.178760151446994	0.0729785262312964
Paraquat	YBR020W	GAL1	12	0.646990628171083	0.114293782426589	0.0329937730253459
Paraquat	YBR021W	FUR4	15	0.909292918720411	1.04088392850839	0.26875507469653
Paraquat	YBR022W	POA1	6	0.645897079465167	0.100810621354647	0.0411557638286344
Paraquat	YBR023C	CHS3	6	0.719212270976167	0.121344330882181	0.0495386156401316
Paraquat	YBR024W	SCO2	6	-0.0456393251925333	0.0232286072824835	0.00948303921293035
Paraquat	YBR025C	OLA1	6	0.5761695644175	0.096197970224527	0.0392726568902567
Paraquat	YBR026C	ETR1	6	0.0932737507281833	0.0371296335564199	0.0151581094249581
Paraquat	YBR027C		6	0.678227328264	0.0692473888658929	0.0282701281235871
Paraquat	YBR028C	YPK3	6	0.695481582872833	0.132554792879806	0.0541152675859722
Paraquat	YBR030W	RKM3	6	0.0768450263819167	0.0770681115448765	0.0314629247874741
Paraquat	YBR031W	RPL4A	6	0.0551425564237667	0.0430158445749612	0.0175611450105871
Paraquat	YBR032W		6	-0.0190122000803333	0.0910986154386079	0.0371908540164365
Paraquat	YBR033W	EDS1	6	0.695328076458333	0.161288267192693	0.0658456593532957
Paraquat	YBR034C	HMT1	6	0.447527003908333	0.119900028001708	0.0489489814582664
Paraquat	YBR035C	PDX3	16	0.396137455813187	0.255761592313521	0.0639403980783804
Paraquat	YBR036C	CSG2	6	0.651851582695333	0.0461015911852352	0.0188208957890362
Paraquat	YBR037C	SCO1	16	0.216003701043927	0.187045417490372	0.0467613543725929
Paraquat	YBR040W	FIG1	6	0.026117925991325	0.0276030624941661	0.0112689030748105
Paraquat	YBR041W	FAT1	6	0.622654079844667	0.0748858936450066	0.0305720380604326
Paraquat	YBR042C	CST26	6	0.570757362918667	0.102897763436133	0.0420078360153563
Paraquat	YBR043C	QDR3	6	0.704952228545833	0.118177650805797	0.0482458239125022
Paraquat	YBR044C	TCM62	6	0.567538594472167	0.103593124922166	0.0422917161532837
Paraquat	YBR045C	GIP1	6	0.0464755656856333	0.142843859259674	0.0583157613460226
Paraquat	YBR046C	ZTA1	6	-0.0200231063109217	0.0359383876140709	0.0146717853054721
Paraquat	YBR047W	FMP23	6	0.728791462841667	0.129834831589251	0.0530048480389753
Paraquat	YBR048W	RPS11B	6	0.284284715215	0.0239887191858507	0.00979335359804122
Paraquat	YBR050C	REG2	6	0.641334620957667	0.170232123356767	0.0694969733424335
Paraquat	YBR051W		6	0.166995860818617	0.0868248769293494	0.0354461075761422
Paraquat	YBR052C	RFS1	6	0.114451591474733	0.0440626477003023	0.0179885005969599
Paraquat	YBR053C		6	0.0818321978122333	0.0332430743568081	0.01357142827593
Paraquat	YBR054W	YRO2	6	0.000471760475558333	0.0308468196157891	0.0125931613743931
Paraquat	YBR056W		6	0.0162006062785333	0.0480943310051343	0.0196344284138492
Paraquat	YBR057C	MUM2	6	0.956466555669333	0.162808835844372	0.0664664289058764
Paraquat	YBR058C	UBP14	6	0.04073789317225	0.0796501726371934	0.0325170468142858
Paraquat	YBR059C	AKL1	6	-0.0175181339964833	0.033466650769482	0.0136627029641922
Paraquat	YBR061C	TRM7	12	0.0355067496752275	0.0460692295215719	0.0132990410328191
Paraquat	YBR062C		6	0.727037591942167	0.0348798703897709	0.0142396474582251
Paraquat	YBR063C		6	-0.0522389848706	0.0423192771961041	0.0172767725689758
Paraquat	YBR064W		6	-0.10742708654285	0.0242782080309608	0.00991153692416579
Paraquat	YBR065C	ECM2	6	-0.0180158474250667	0.0721021994940321	0.029435599682123
Paraquat	YBR066C	NRG2	6	0.0865861791917833	0.0265427646813381	0.0108360383053409
Paraquat	YBR067C	TIP1	6	0.0999753585755333	0.0315974952390886	0.012899623414298
Paraquat	YBR068C	BAP2	6	0.699288881580167	0.0812643499752359	0.0331760319530471
Paraquat	YBR069C	TAT1	6	0.05704098473159	0.0712122156693309	0.0290722653071482
Paraquat	YBR071W		6	0.0461879823734833	0.0765882906038009	0.0312670387085513
Paraquat	YBR072W	HSP26	6	0.5650928423635	0.0846245784996513	0.0345478395037076
Paraquat	YBR073W	RDH54	6	0.694181065734667	0.14732775190193	0.060146302851847
Paraquat	YBR074W	PFF1	6	0.7237854951745	0.0260197731880093	0.0106225279222623
Paraquat	YBR075W		12	0.0805565724608142	0.0555628030356455	0.01603959964478
Paraquat	YBR076W	ECM8	6	0.806941225263667	0.0870323658090189	0.0355308145565575
Paraquat	YBR077C	SLM4	6	0.6929142937125	0.0496414137475147	0.0202660222986322
Paraquat	YBR078W	ECM33	6	-0.1609712882152	0.0557489111261182	0.0227593976624596
Paraquat	YBR081C	SPT7	16	0.310669275883756	0.405381851509791	0.101345462877448
Paraquat	YBR082C	UBC4	12	0.0444495312908083	0.0992712089020242	0.0286571295911816
Paraquat	YBR083W	TEC1	6	0.688592401266667	0.216572063023715	0.0884151744916638
Paraquat	YBR084C-A	RPL19A	6	0.260446537648833	0.0312750665444398	0.0127679924509111
Paraquat	YBR084W	MIS1	6	-0.0222194657746333	0.0206357121905882	0.00842449422431195
Paraquat	YBR085W	AAC3	6	0.932833892901333	0.182716385080629	0.0745936518489036
Paraquat	YBR086C	IST2	6	0.948958354273167	0.174713490750818	0.0713264839199954
Paraquat	YBR090C		6	0.105828395546483	0.0586035435443357	0.0239247964670996
Paraquat	YBR090C-A	NA	6	0.068570284045835	0.0581026156744812	0.0237202935205858
Paraquat	YBR092C	PHO3	6	0.753176367601	0.0696690353900648	0.0284422645962603
Paraquat	YBR093C	PHO5	6	0.9181711440825	0.0610477932639292	0.0249226572365904
Paraquat	YBR094W	PBY1	6	0.0504689351483333	0.0180556351972284	0.00737118220250765
Paraquat	YBR095C	RXT2	12	-0.00937973150966333	0.0365835013981672	0.0105607471900655
Paraquat	YBR098W	MMS4	6	0.180860840484667	0.0197927362993252	0.00808035075780154
Paraquat	YBR099C		6	0.811777288004	0.0658883940981262	0.0268988242519693
Paraquat	YBR100W		6	0.645197372981667	0.086758363075515	0.0354189534090221
Paraquat	YBR101C	FES1	6	0.276259721138333	0.078028502219279	0.0318550026384764
Paraquat	YBR103W	SIF2	6	0.791893155699667	0.118380892924936	0.0483287971601907
Paraquat	YBR104W	YMC2	6	1.38018688709167	0.168255042962709	0.0686898336514496
Paraquat	YBR105C	VID24	6	0.326058243505333	0.0435564754608915	0.0177818566455402
Paraquat	YBR106W	PHO88	6	0.05383658967535	0.0222964264932277	0.00910247799931339
Paraquat	YBR107C	IML3	6	0.0298710233939	0.0344498305632995	0.0140640844342368
Paraquat	YBR108W	AIM3	6	0.0184439785601033	0.0337426009280447	0.0137753591446786
Paraquat	YBR111C	YSA1	6	0.140522680164917	0.0835070525945299	0.0340916114633927
Paraquat	YBR113W		6	-0.0442847098995417	0.0505873455044328	0.0206521973212895
Paraquat	YBR114W	RAD16	6	0.365026277594333	0.0589518276213221	0.0240669828461251
Paraquat	YBR115C	LYS2	12	-0.116257254465725	0.0599805028315405	0.0173148797279595
Paraquat	YBR116C		6	0.611304871332833	0.0828682823665153	0.0338308346098066
Paraquat	YBR118W	TEF2	6	0.260723532423667	0.0770045341700934	0.0314369694329068
Paraquat	YBR119W	MUD1	6	-0.03171762597705	0.0196619092328772	0.00802694083157776
Paraquat	YBR121C	GRS1	6	0.119696448345917	0.0196118289391715	0.00800649563728648
Paraquat	YBR122C	MRPL36	0	NA	NA	NA
Paraquat	YBR125C	PTC4	6	0.0534044291761	0.0669116858145633	0.0273165813458506
Paraquat	YBR126C	TPS1	6	0.477438115127167	0.194008355323463	0.0792035793965095
Paraquat	YBR128C	ATG14	6	0.00838448839868333	0.0643442965291741	0.0262684490591352
Paraquat	YBR129C	OPY1	6	0.452640779743167	0.0720487864868007	0.0294137939132323
Paraquat	YBR130C	SHE3	6	0.120179675246433	0.0473899659196128	0.0193468725718227
Paraquat	YBR131W	CCZ1	6	0.761981392738	0.0144555028883867	0.00590143434197929
Paraquat	YBR132C	AGP2	6	-0.0623701187402	0.0435206973930459	0.0177672503105061
Paraquat	YBR133C	HSL7	8	0.0045009640540625	0.0789713695232013	0.0279205954547221
Paraquat	YBR134W		6	-0.0173889023171117	0.0190955609436119	0.00779573011067809
Paraquat	YBR137W		6	0.628071195957333	0.108953722023894	0.0444801707559296
Paraquat	YBR138C		6	0.0807598217179167	0.113101831245213	0.0461736292541906
Paraquat	YBR139W		6	0.00887738399389667	0.0366979105254968	0.0149818592356299
Paraquat	YBR141C	BMT2	5	2.062142324744	0.208127321390134	0.0930773677206571
Paraquat	YBR144C		6	0.289381324213167	0.0332361469304323	0.0135686001659548
Paraquat	YBR145W	ADH5	6	0.353332876099833	0.0653195648660969	0.0266666006904275
Paraquat	YBR146W	MRPS9	6	0.470444018216167	0.0751405917996305	0.0306760181466421
Paraquat	YBR147W	RTC2	6	0.449662392178	0.039991513987316	0.0163264672183834
Paraquat	YBR148W	YSW1	6	1.88338895878167	0.200215004323828	0.0817374332404176
Paraquat	YBR149W	ARA1	6	0.0150414303827617	0.0530106877753449	0.0216415226605982
Paraquat	YBR150C	TBS1	6	0.791141865168167	0.167317682628414	0.068307157897425
Paraquat	YBR151W	APD1	6	0.0773998210028833	0.0369422555810559	0.0150816126868452
Paraquat	YBR156C	SLI15	6	0.0671520217390667	0.139927546944412	0.0571251818288582
Paraquat	YBR157C	ICS2	6	0.6742386274785	0.141925342816405	0.057940778578295
Paraquat	YBR158W	AMN1	6	0.0607767786539167	0.0389103061027661	0.0158850659478799
Paraquat	YBR159W	IFA38	6	0.397047419935833	0.0796125266858893	0.032501677919023
Paraquat	YBR161W	CSH1	6	0.0970367142544333	0.0610883599866829	0.0249392185318044
Paraquat	YBR162C	TOS1	6	-0.0288782286864967	0.0371933538786649	0.0151841231375824
Paraquat	YBR162W-A	YSY6	6	0.117833843902133	0.0279517352441545	0.0114112481289246
Paraquat	YBR163W	EXO5	8	-0.168566420560763	0.057542387808548	0.0203443063125452
Paraquat	YBR164C	ARL1	6	0.639178723621167	0.160838113339542	0.0656618848123009
Paraquat	YBR165W	UBS1	12	0.297104074354692	0.373567391710502	0.107839617082262
Paraquat	YBR166C	TYR1	6	-0.0205879021240313	0.0341269361609447	0.013932263346475
Paraquat	YBR168W	PEX32	6	0.163568366449	0.0276697566123085	0.0112961308345261
Paraquat	YBR169C	SSE2	6	0.152607998037133	0.0874959868936032	0.0357200870717621
Paraquat	YBR170C	NPL4	6	0.652370603365333	0.12232175537303	0.0499376475175785
Paraquat	YBR171W	SEC66	6	-0.102229354378433	0.0290893371789569	0.011875672174036
Paraquat	YBR172C	SMY2	6	1.88988435414667	0.0884239688200667	0.0360989341068222
Paraquat	YBR173C	UMP1	0	NA	NA	NA
Paraquat	YBR174C		6	0.357780717162	0.0188458270297535	0.00769377666727453
Paraquat	YBR175W	SWD3	6	1.252147345055	0.180382685881711	0.0736409231404886
Paraquat	YBR176W	ECM31	6	-0.03824927419315	0.0185421310189246	0.00756979329003294
Paraquat	YBR177C	EHT1	6	0.0220310171104667	0.049989829338376	0.0204082623679723
Paraquat	YBR178W		6	0.700522593347	0.136469350773398	0.055713379153953
Paraquat	YBR179C	FZO1	8	0.172916651203	0.0292685030218829	0.0103479784809762
Paraquat	YBR180W	DTR1	6	0.639243969967333	0.149773443023809	0.061144752071357
Paraquat	YBR181C	RPS6B	6	0.503589579957	0.0761951164512761	0.0311065260329284
Paraquat	YBR182C	SMP1	6	0.673348603451833	0.134576156415711	0.0549404857939113
Paraquat	YBR183W	YPC1	6	0.236061078117167	0.0548701729002537	0.0224006542839851
Paraquat	YBR184W		6	0.712109619687167	0.150255403804994	0.0613415117363461
Paraquat	YBR185C	MBA1	6	0.04245357112595	0.0456054951354704	0.0186183654248138
Paraquat	YBR186W	PCH2	6	-0.00245822163474167	0.0364194438357546	0.0148681756855915
Paraquat	YBR187W	GDT1	6	1.638081923335	0.0798219011147006	0.032587154671652
Paraquat	YBR188C	NTC20	6	-0.0891515895400333	0.0286207278635312	0.0116843632221181
Paraquat	YBR189W	RPS9B	6	0.275662143635833	0.0702223787032557	0.0286681660579101
Paraquat	YBR191W	RPL21A	11	0.949983716772636	0.556242930720565	0.167713553953433
Paraquat	YBR194W	AIM4	6	0.103454764097088	0.075996961852437	0.0310256297567048
Paraquat	YBR195C	MSI1	6	0.59538673135	0.266271346946343	0.108704822190355
Paraquat	YBR197C		6	0.104406699997132	0.090106839754005	0.0367859632886738
Paraquat	YBR199W	KTR4	6	0.141298038618667	0.0261450933042542	0.01067368964548
Paraquat	YBR200W	BEM1	6	0.247215440934833	0.0606454594524667	0.0247584051458651
Paraquat	YBR201W	DER1	6	0.613554936076167	0.126338556395666	0.0515774996682029
Paraquat	YBR203W	COS111	6	0.143659647766617	0.0475814807157602	0.0194250581599484
Paraquat	YBR204C	LDH1	6	0.6891006704395	0.0696518520660026	0.0284352495335875
Paraquat	YBR205W	KTR3	6	0.0842894578883	0.0559979308729949	0.0228610595484137
Paraquat	YBR206W		6	0.623082819182667	0.042102674649284	0.0171883449495264
Paraquat	YBR207W	FTH1	6	0.02192385086723	0.0288901093664597	0.0117943377601712
Paraquat	YBR208C	DUR1,2	6	0.00568489380641667	0.0482820990885566	0.0197110844129101
Paraquat	YBR209W		6	-0.1534882593048	0.0924152998627393	0.0377283881816686
Paraquat	YBR210W	ERV15	6	0.11049991841305	0.0930823605058081	0.0380007145488372
Paraquat	YBR212W	NGR1	6	0.577904007082167	0.144229161208039	0.0588813084982188
Paraquat	YBR213W	MET8	6	0.05219071005615	0.0754805403032851	0.0308148015421048
Paraquat	YBR214W	SDS24	6	0.0117295401282167	0.0407638315908993	0.0166417645597415
Paraquat	YBR215W	HPC2	6	0.789628600316333	0.139806551387112	0.0570757855994368
Paraquat	YBR216C	YBP1	6	1.051024096902	0.166000914763706	0.0677695896677203
Paraquat	YBR217W	ATG12	6	0.10618100214205	0.0369246966096169	0.0150744442667729
Paraquat	YBR218C	PYC2	6	0.539660715248167	0.022638100320536	0.00924196575520823
Paraquat	YBR219C		6	0.00714185745831667	0.0584758324406382	0.0238726586273418
Paraquat	YBR220C		6	0.0176413217482	0.0590537999936313	0.0241086128927948
Paraquat	YBR221C	PDB1	6	-0.04386411077233	0.0490703655752447	0.0200328928585305
Paraquat	YBR222C	PCS60	6	0.0236013598462067	0.0156636893947101	0.00639467441774736
Paraquat	YBR223C	TDP1	5	0.707424012106	0.109678012951471	0.0490494985193183
Paraquat	YBR224W		6	0.5790597562965	0.174311034235775	0.071162181735743
Paraquat	YBR225W		6	0.561077671896333	0.125354187723571	0.051175632840634
Paraquat	YBR226C		6	0.107146043600067	0.0473972143551922	0.0193498317332565
Paraquat	YBR227C	MCX1	6	0.4701036717835	0.129455418876694	0.0528499534476938
Paraquat	YBR228W	SLX1	6	-0.028789822132655	0.0761870341380001	0.0311032264423505
Paraquat	YBR229C	ROT2	6	-0.0252348975840167	0.0741403165206654	0.0302676574740113
Paraquat	YBR230C	OM14	6	0.04438902922029	0.0879080968422054	0.0358883302537621
Paraquat	YBR231C	SWC5	6	0.116841784908342	0.116419410962495	0.0475280255022483
Paraquat	YBR232C		6	-0.1153875600568	0.0805162072190882	0.0328706039518269
Paraquat	YBR233W	PBP2	5	1.6270744461	0.229981853050434	0.102851011402428
Paraquat	YBR235W	VHC1	6	0.101997499193867	0.0691321554258197	0.028223084268673
Paraquat	YBR238C		6	-0.0412593760272167	0.0459175270912544	0.0187457519373327
Paraquat	YBR239C	ERT1	6	0.139778719210228	0.138150481923118	0.0563996980718717
Paraquat	YBR240C	THI2	6	0.02524157166585	0.0940552781139162	0.0383979064991095
Paraquat	YBR241C		6	-0.095107302916065	0.161170152138567	0.0657974390843709
Paraquat	YBR242W		6	0.130300363898967	0.346444240292935	0.141435268840642
Paraquat	YBR244W	GPX2	6	0.270960065617383	0.200551461896772	0.0818747914693857
Paraquat	YBR245C	ISW1	6	0.0496192016391667	0.2776349351623	0.113343987653055
Paraquat	YBR246W	RRT2	6	0.124010545771067	0.070702034417825	0.0288639846833943
Paraquat	YBR248C	HIS7	6	-0.0890185222213	0.0468556211260736	0.019128727223342
Paraquat	YBR249C	ARO4	6	0.6764146947005	0.144392820185233	0.0589481219958772
Paraquat	YBR250W	SPO23	6	0.222769384618	0.132171604771577	0.0539588316958615
Paraquat	YBR251W	MRPS5	8	0.145925316996625	0.032754767104367	0.011580558967842
Paraquat	YBR255W	MTC4	6	0.7864024681225	0.206716982868122	0.0843918548657585
Paraquat	YBR258C	SHG1	6	0.0298305465915033	0.0857789505513455	0.035019109920371
Paraquat	YBR259W		6	0.00447987125818333	0.069362054616622	0.028316940220297
Paraquat	YBR260C	RGD1	6	-0.0447599197941117	0.0574902793535242	0.0234703082643662
Paraquat	YBR261C	TAE1	6	0.7550403339335	0.186065986838525	0.0759611210402994
Paraquat	YBR262C	MIC12	6	0.04914020706965	0.0319355133719113	0.0130376187391686
Paraquat	YBR263W	SHM1	6	0.1187837046294	0.0221022486738787	0.00902320523651818
Paraquat	YBR264C	YPT10	6	0.544199017451767	0.441340238902869	0.180176398045009
Paraquat	YBR266C	SLM6	6	0.282556884552167	0.0456312004152266	0.0186288595613302
Paraquat	YBR267W	REI1	6	0.328010161003333	0.0211682484242056	0.0086419012312963
Paraquat	YBR268W	MRPL37	16	0.0648214163173562	0.0672509686746374	0.0168127421686593
Paraquat	YBR269C	SDH8	6	0.900193097934167	0.165551458237475	0.0675860998092487
Paraquat	YBR270C	BIT2	6	0.102161842138433	0.0520849367575474	0.0212635863901872
Paraquat	YBR271W	EFM2	6	0.663945524661833	0.188210461785207	0.0768365992712249
Paraquat	YBR272C	HSM3	6	0.182827063568133	0.136556208247878	0.0557488385694235
Paraquat	YBR273C	UBX7	6	0.0192422853929167	0.0552879060183921	0.0225711931153353
Paraquat	YBR274W	CHK1	6	-0.0725780974441	0.0497125215848254	0.0202950519516529
Paraquat	YBR275C	RIF1	6	0.8032508866865	0.0771692935491881	0.0315042321677601
Paraquat	YBR276C	PPS1	6	0.0259360891055717	0.0213088129418468	0.00869928645532319
Paraquat	YBR277C		6	-0.0237591086129	0.112377145153977	0.0458777773963207
Paraquat	YBR278W	DPB3	6	0.070373486375335	0.0621304926337989	0.025364667403426
Paraquat	YBR280C	SAF1	6	-0.0405623268978	0.0666001712989195	0.0271894060773843
Paraquat	YBR281C	DUG2	6	0.1476906109824	0.084753477303411	0.0346004622199854
Paraquat	YBR282W	MRPL27	16	0.570835222533744	0.553048448684863	0.138262112171216
Paraquat	YBR283C	SSH1	6	0.0402459663769618	0.0603462130305235	0.0246362383056793
Paraquat	YBR284W		6	0.183205718557817	0.0921820362546012	0.0376331587124188
Paraquat	YBR285W		5	0.3500178177598	0.106706095473948	0.047720416618666
Paraquat	YBR286W	APE3	6	0.159778216438383	0.0753060672276526	0.0307435732072459
Paraquat	YBR287W		6	0.0155617445831983	0.0289188131524052	0.0118060560317133
Paraquat	YBR288C	APM3	6	0.371503001774	0.145942209422067	0.059580657503078
Paraquat	YBR289W	SNF5	6	1.38345126199167	0.181289183590881	0.0740109992805664
Paraquat	YBR290W	BSD2	6	-0.09029494158545	0.0565994032637956	0.0231066096237193
Paraquat	YBR291C	CTP1	6	0.0910633117845833	0.0834077496162685	0.0340510711922795
Paraquat	YBR292C		6	0.0791670000606333	0.0681129438556012	0.0278069928875103
Paraquat	YBR293W	VBA2	6	-0.0189916555599	0.107332614798433	0.0438183565024765
Paraquat	YBR294W	SUL1	6	-0.0645440353057833	0.0349195598441266	0.0142558506101152
Paraquat	YBR295W	PCA1	6	0.140653337039133	0.0879131807557526	0.0358904057527766
Paraquat	YBR296C	PHO89	6	0.0481989257295333	0.0613458919401811	0.0250443555115598
Paraquat	YBR297W	MAL33	6	0.0667758909834333	0.0321389812329886	0.0131206841456178
Paraquat	YBR298C	MAL31	6	0.0665833711487517	0.0470339907420529	0.0192015463141363
Paraquat	YBR299W	MAL32	6	2.99938179229667	0.230316871304762	0.0940264689751545
Paraquat	YBR300C		6	-0.0326858162204583	0.0933843923458148	0.0381240185311856
Paraquat	YBR301W	PAU24	6	-0.00362203459275	0.0495855297079195	0.0202432077350032
Paraquat	YCL001W	RER1	6	0.6405746544575	0.270026324904806	0.110237785522627
Paraquat	YCL001W-A		6	0.0814832372574383	0.0717132910372938	0.0292768284695127
Paraquat	YCL002C		6	0.00404889698518333	0.0489807085501182	0.0199962905312945
Paraquat	YCL006C		6	0.483443492096167	0.12782453272764	0.0521841469654012
Paraquat	YCL009C	ILV6	6	0.744029206903667	0.165608793112162	0.0676095066738235
Paraquat	YCL010C	SGF29	6	0.478608766356	0.117698538415452	0.0480502270982035
Paraquat	YCL011C	GBP2	6	-0.0318105889929	0.0968981682164049	0.0395585115234271
Paraquat	YCL012W		6	0.0323755549527167	0.0369458426975987	0.0150830771210415
Paraquat	YCL013W		6	-0.0040761159754	0.0419500697438891	0.0171260442577825
Paraquat	YCL014W	BUD3	6	0.616978102507333	0.143602335433067	0.0586254079471678
Paraquat	YCL016C	DCC1	6	0.199121925880167	0.0661957060546818	0.0270242838328722
Paraquat	YCL022C		6	0.0708002857496983	0.0702886867921252	0.028695236221835
Paraquat	YCL023C		6	0.5458906268115	0.182320363606555	0.0744319767591261
Paraquat	YCL024W	KCC4	6	0.582524557796667	0.192670402067239	0.0786573622669353
Paraquat	YCL025C	AGP1	6	0.603607844021333	0.0258328571408195	0.0105462197655368
Paraquat	YCL026C		6	0.161736866002817	0.0817627937685953	0.0333795207795784
Paraquat	YCL026C-A	FRM2	6	0.608644821443333	0.17961794910816	0.0733287206600316
Paraquat	YCL027W	FUS1	6	0.166926205536867	0.0876791464616292	0.0357948616522908
Paraquat	YCL028W	RNQ1	6	-0.02124037938045	0.0967661977536695	0.0395046348076237
Paraquat	YCL029C	BIK1	6	0.0359310909885302	0.0514431461002656	0.0210015764515162
Paraquat	YCL030C	HIS4	6	0.0377998053446333	0.0572744532468646	0.0233821976252849
Paraquat	YCL032W	STE50	6	0.177690776563333	0.25946521206633	0.105926229260923
Paraquat	YCL033C	MXR2	6	0.14114869728926	0.0994563750352436	0.040602895083871
Paraquat	YCL034W	LSB5	6	-0.069296175742405	0.0789723397251209	0.032240322686712
Paraquat	YCL035C	GRX1	6	0.552615909587333	0.0937246010884517	0.0382629081687679
Paraquat	YCL036W	GFD2	6	0.107089134771717	0.0454622223114125	0.0185598745393222
Paraquat	YCL037C	SRO9	6	0.383117730506833	0.117951623523483	0.0481535486608992
Paraquat	YCL038C	ATG22	6	0.149910771717267	0.0497431879150188	0.0203075714285291
Paraquat	YCL039W	GID7	6	0.00951280155126667	0.131143720673908	0.0535391997701935
Paraquat	YCL040W	GLK1	6	0.105769722703372	0.252377418326648	0.103032649583537
Paraquat	YCL042W		6	0.459103238000333	0.585519206605903	0.239037215130617
Paraquat	YCL044C	MGR1	6	0.0793766266459667	0.143294890917735	0.0584998942493711
Paraquat	YCL045C	EMC1	6	0.0744996958433333	0.268152355660054	0.109472740782075
Paraquat	YCL046W		6	0.43140993267105	0.478853957975214	0.195491309725236
Paraquat	YCL047C	POF1	6	0.132823753079983	0.0587830989121655	0.0239980996390597
Paraquat	YCL048W	SPS22	6	-0.0948471569086667	0.0600319249958019	0.024507930752791
Paraquat	YCL049C		6	0.657734878457167	0.116710430421575	0.0476468336989097
Paraquat	YCL050C	APA1	6	0.153126607499717	0.10345283713222	0.0422344439028653
Paraquat	YCL051W	LRE1	6	0.0256184138493167	0.0533452009270601	0.0217780870829236
Paraquat	YCL055W	KAR4	6	0.12558390983875	0.0739559058610853	0.0301923721374945
Paraquat	YCL056C	PEX34	6	-0.004613592695	0.136574146056492	0.055756161649125
Paraquat	YCL057W	PRD1	6	0.0109963232021267	0.0191065498145741	0.0078002162984625
Paraquat	YCL060C		6	0.503856879830167	0.0836071478713464	0.0341324751890366
Paraquat	YCL061C	MRC1	6	0.892727117326667	0.0568240704207584	0.0231983296064728
Paraquat	YCL062W		6	1.22440084092	0.204987257868715	0.083685697591778
Paraquat	YCL063W	VAC17	6	0.19548638415485	0.350357525952598	0.143032861021297
Paraquat	YCL064C	CHA1	6	-0.03419894928325	0.123947356661121	0.0506012964644173
Paraquat	YCL069W	VBA3	6	0.0225882405070333	0.105821608959456	0.0432014909518335
Paraquat	YCL074W		6	0.0408447321095833	0.0982080488550142	0.0400932680548511
Paraquat	YCL075W		6	0.800503206683333	0.180542748205466	0.073706268310529
Paraquat	YCL076W		6	0.554389381021333	0.181927312153773	0.0742715141754633
Paraquat	YCR001W		5	0.148528509566904	0.128500095786343	0.0574669898586996
Paraquat	YCR002C	CDC10	8	0.095413401437325	0.0553091661499553	0.0195547432232034
Paraquat	YCR003W	MRPL32	8	-0.10544168166096	0.0553216445140257	0.0195591549911296
Paraquat	YCR004C	YCP4	8	-0.134056567329588	0.0476151753908782	0.0168345067031384
Paraquat	YCR005C	CIT2	6	0.667254481602333	0.0523755228709636	0.0213822176742218
Paraquat	YCR006C		6	0.0786081083813	0.0511815995191301	0.0208948005068909
Paraquat	YCR007C		6	0.821865959423167	0.0423868885230363	0.0173043747776119
Paraquat	YCR008W	SAT4	6	1.45107759065833	0.120409742175648	0.0491570713984026
Paraquat	YCR009C	RVS161	6	1.18224568345667	0.0512816371023848	0.0209356406792368
Paraquat	YCR010C	ADY2	6	0.129950595282667	0.101461806143814	0.0414216089055878
Paraquat	YCR011C	ADP1	6	-0.0605662688481817	0.0805807308945607	0.032896945632033
Paraquat	YCR014C	POL4	6	0.0539861256647967	0.0604461675405686	0.0246770445635294
Paraquat	YCR015C	CTO1	6	0.8221067710795	0.227364835257392	0.0928213053054282
Paraquat	YCR016W		6	0.10073925336256	0.0905081483960945	0.0369497968557552
Paraquat	YCR017C	CWH43	6	0.616037025180667	0.169735934337528	0.0692944050235822
Paraquat	YCR019W	MAK32	6	0.09746970228785	0.104359185533841	0.0426044590883918
Paraquat	YCR020C	PET18	6	0.461105598663333	0.0578759470413399	0.0236277564386041
Paraquat	YCR020C-A	MAK31	6	0.890817091143	0.132829853012041	0.0542275604147321
Paraquat	YCR020W-B	HTL1	0	NA	NA	NA
Paraquat	YCR021C	HSP30	6	0.06019686414255	0.112880795853546	0.0460833919334107
Paraquat	YCR022C		6	0.06784113727305	0.14716231646681	0.0600787641182774
Paraquat	YCR023C		6	0.0432479799721483	0.0641940059611498	0.0262070931916664
Paraquat	YCR024C	SLM5	16	0.076389790309	0.0290273743550795	0.00725684358876988
Paraquat	YCR024C-A	PMP1	6	0.10338023827985	0.0740971665893525	0.0302500415883192
Paraquat	YCR025C		6	0.650158115340333	0.148448506487438	0.0606038489954102
Paraquat	YCR026C	NPP1	6	0.07381112746319	0.0630048946255985	0.0257216405217564
Paraquat	YCR027C	RHB1	6	0.0493747887735783	0.0676740089333726	0.0276277984558855
Paraquat	YCR028C	FEN2	16	0.791636080057325	0.736627177940448	0.184156794485112
Paraquat	YCR028C-A	RIM1	6	-0.0706039676683	0.0588317601716202	0.0240179655150439
Paraquat	YCR030C	SYP1	6	0.0572892981992667	0.144044967632827	0.0588061117860241
Paraquat	YCR031C	RPS14A	6	-0.0281211974115167	0.141389021503735	0.057721826319258
Paraquat	YCR032W	BPH1	6	0.1876015724405	0.320195410579572	0.130719228983485
Paraquat	YCR033W	SNT1	6	0.7232630931905	0.464595069239113	0.189670142774808
Paraquat	YCR034W	ELO2	6	0.380160367324	0.133504440133027	0.0545029594536436
Paraquat	YCR036W	RBK1	6	0.105351601020967	0.105745050292266	0.0431702360068328
Paraquat	YCR037C	PHO87	6	-0.01912356126305	0.100482340764717	0.0410217438390029
Paraquat	YCR043C		6	0.00817798526115	0.0942751619054306	0.0384876736810959
Paraquat	YCR044C	PER1	6	-0.0173833399112333	0.107583744278603	0.0439208796834412
Paraquat	YCR045C	RRT12	6	0.0861037686324	0.087791337162131	0.0358406633139766
Paraquat	YCR046C	IMG1	16	0.201261502239056	0.281202477180425	0.0703006192951063
Paraquat	YCR047C	BUD23	16	0.544080163901738	0.421376934221471	0.105344233555368
Paraquat	YCR048W	ARE1	6	0.591136060721333	0.192747685535534	0.0786889131107482
Paraquat	YCR049C		6	-0.00080439882305	0.0271968348465653	0.0111030613321383
Paraquat	YCR050C		6	0.0638621642350167	0.0373217907820466	0.0152365572838205
Paraquat	YCR051W		6	0.0524050701805	0.0295479388462628	0.0120628955207176
Paraquat	YCR053W	THR4	6	0.166489050150283	0.105340281403644	0.04300498980002
Paraquat	YCR059C	YIH1	6	-0.05904123592229	0.0551161299825579	0.0225010658423633
Paraquat	YCR060W	TAH1	6	-0.00598371300906667	0.0610414975332435	0.0249200870153008
Paraquat	YCR061W		6	0.472771116229833	0.0519794962418224	0.0212205404798968
Paraquat	YCR062W		6	0.12363392104655	0.0627644314360088	0.0256234718356869
Paraquat	YCR063W	BUD31	6	0.3241538827845	0.0552924771254268	0.0225730592619677
Paraquat	YCR065W	HCM1	6	0.141939050714933	0.0928636353009927	0.0379114203578899
Paraquat	YCR067C	SED4	6	0.489036462986333	0.144802531724125	0.0591153860312134
Paraquat	YCR068W	ATG15	6	0.0180835588993167	0.0921700863879968	0.0376282801998063
Paraquat	YCR069W	CPR4	6	0.0136770622445167	0.121368463071897	0.0495484675653284
Paraquat	YCR071C	IMG2	6	-0.10802103121525	0.0319081722314911	0.0130264567653328
Paraquat	YCR073C	SSK22	6	0.619716655537	0.130367431252844	0.0532222809411386
Paraquat	YCR073W-A	SOL2	6	0.06447441650335	0.0389977853341999	0.0159207791945638
Paraquat	YCR075C	ERS1	6	0.555316218348833	0.138555485775193	0.0565650402021125
Paraquat	YCR076C	FUB1	6	0.183346986896633	0.087353778211261	0.0356620306203067
Paraquat	YCR077C	PAT1	6	0.179079206610167	0.0354888224420962	0.0144882510925614
Paraquat	YCR079W	PTC6	6	-0.0603908322673333	0.0601902764669404	0.0245725774701757
Paraquat	YCR081W	SRB8	6	0.313343889942428	0.249299279130081	0.101776004518729
Paraquat	YCR082W	AHC2	6	0.05037029048795	0.0672115093747253	0.0274389838017275
Paraquat	YCR083W	TRX3	6	0.292024599831833	0.300250980413325	0.122576949463839
Paraquat	YCR085W		6	-0.0162307010176833	0.199794798859846	0.0815658850781035
Paraquat	YCR086W	CSM1	6	0.423900818051833	0.0445557957793111	0.0181898274571608
Paraquat	YCR087C-A		6	0.0855043269077	0.0771447022181499	0.0314941927989035
Paraquat	YCR087W		6	0.5314090961055	0.142744669796654	0.0582752674173124
Paraquat	YCR088W	ABP1	6	0.0539493310106333	0.0274151202738717	0.0111921759846693
Paraquat	YCR089W	FIG2	6	0.517335845739833	0.112184021420288	0.0457989349621941
Paraquat	YCR090C		6	0.0141632040596833	0.0541830079123646	0.0221201203524128
Paraquat	YCR091W	KIN82	6	-0.00363596548635	0.0650877309467339	0.026571954889176
Paraquat	YCR092C	MSH3	6	0.143251996937133	0.0334074550657409	0.013638536419337
Paraquat	YCR095C	OCA4	6	-0.049194092477	0.231313312823261	0.0944332645216292
Paraquat	YCR098C	GIT1	6	0.0720098649570717	0.0673631736465911	0.0275009004814411
Paraquat	YCR099C		6	0.622056318963167	0.089728406554568	0.0366314685819489
Paraquat	YCR100C		6	0.0271482194153167	0.0332294230636342	0.0135658551588291
Paraquat	YCR101C		6	0.0639311245895	0.143687321683682	0.0586601034386943
Paraquat	YCR102C		6	-0.0893716946318	0.0954195890862519	0.0389548841212266
Paraquat	YCR102W-A		4	0.8014475345605	0.196256868759382	0.098128434379691
Paraquat	YCR105W	ADH7	6	0.4056093619645	0.145338195872974	0.0593340700042437
Paraquat	YCR106W	RDS1	6	-0.0341998570502087	0.0207146101361118	0.00845670417569305
Paraquat	YCR107W	AAD3	6	0.1158944054383	0.18244415170408	0.0744825130383203
Paraquat	YDL001W	RMD1	6	0.0549095172138333	0.0907542715559099	0.0370502762149934
Paraquat	YDL002C	NHP10	6	0.0194639175622828	0.0214941894886189	0.008774966113635
Paraquat	YDL006W	PTC1	6	0.7530054930145	0.147888941060122	0.0603754073663059
Paraquat	YDL010W	GRX6	6	0.714626456879833	0.058191325140303	0.0237565090083555
Paraquat	YDL011C		6	0.0273285473045667	0.0289126053141647	0.0118035216923641
Paraquat	YDL012C		6	0.5652753836755	0.113182003069243	0.0462063592642941
Paraquat	YDL013W	SLX5	6	0.147294680814967	0.200686415682926	0.0819298861218748
Paraquat	YDL018C	ERP3	6	0.594856121409833	0.304987753601192	0.124510729020101
Paraquat	YDL019C	OSH2	6	0.02092609797135	0.0544850472695428	0.0222434274036336
Paraquat	YDL020C	RPN4	6	0.786269113757667	0.0980486733746461	0.0400282032874489
Paraquat	YDL021W	GPM2	8	-0.137848038643687	0.0945734142873893	0.0334367512812888
Paraquat	YDL022W	GPD1	8	-0.0087841429116775	0.0500250937486828	0.0176865415095932
Paraquat	YDL023C		6	0.681406755486167	0.16009567829047	0.065358786972737
Paraquat	YDL024C	DIA3	6	0.8027770217555	0.210052684122262	0.0857536492002592
Paraquat	YDL025C	RTK1	6	-0.0407157413689667	0.080143686152002	0.0327185228630272
Paraquat	YDL026W		6	0.582119824405	0.214736928761281	0.0876659840662532
Paraquat	YDL027C	MRX9	6	-0.00948771665779167	0.0245575173110977	0.0100255644602924
Paraquat	YDL032W		8	0.348223606109875	0.0470236467397249	0.0166253697428901
Paraquat	YDL033C	SLM3	6	-0.1925083902037	0.0726006763263536	0.0296391019967541
Paraquat	YDL034W		6	0.0243005166245017	0.0377724740152351	0.0154205479433104
Paraquat	YDL035C	GPR1	6	-0.0147330202231167	0.0721258807596101	0.0294452675183112
Paraquat	YDL036C	PUS9	6	-0.0655043825789183	0.0627696005601963	0.0256255821217997
Paraquat	YDL037C	BSC1	6	-0.0643605653489733	0.0580592693697936	0.0237025974657992
Paraquat	YDL038C		6	0.588552635179833	0.14274033396222	0.0582734973203172
Paraquat	YDL039C	PRM7	6	0.0377861370845533	0.0447569638095888	0.0182719539616176
Paraquat	YDL040C	NAT1	6	0.555588945959333	0.151389381003676	0.0618044559891331
Paraquat	YDL041W		6	0.026752418095455	0.0437279663738121	0.0178518675175701
Paraquat	YDL042C	SIR2	6	0.724010117876167	0.233665738894501	0.0953936384436553
Paraquat	YDL044C	MTF2	8	-0.0901893778026375	0.0257845969076135	0.0091162316617676
Paraquat	YDL045W-A	MRP10	16	0.132676313131443	0.201624023661961	0.0504060059154904
Paraquat	YDL046W	NPC2	6	0.0934897123020833	0.0617112418889795	0.0251935090035778
Paraquat	YDL047W	SIT4	8	0.120489179289775	0.0320969015023574	0.0113479683536968
Paraquat	YDL048C	STP4	6	-0.0035627270217725	0.05632823804893	0.0229959068883172
Paraquat	YDL049C	KNH1	16	0.214096817446356	0.279981547677934	0.0699953869194835
Paraquat	YDL050C		6	0.0939666788725333	0.085576756183252	0.0349365644152554
Paraquat	YDL051W	LHP1	6	-0.0917861857322733	0.0832569240923554	0.0339894969299837
Paraquat	YDL052C	SLC1	6	-0.130832776069312	0.113190126829359	0.0462096757754738
Paraquat	YDL053C	PBP4	6	0.0637119368708583	0.0463919393700617	0.0189394299391309
Paraquat	YDL054C	MCH1	6	0.0396165109893542	0.100427709441171	0.0409994406945597
Paraquat	YDL056W	MBP1	6	0.519736006079833	0.141357744037887	0.0577090573472958
Paraquat	YDL057W		16	0.208058025119987	0.24518837310326	0.0612970932758151
Paraquat	YDL059C	RAD59	6	0.000127409517113333	0.0274612874332848	0.0112110236485753
Paraquat	YDL061C	RPS29B	6	0.252620486121667	0.0424993655025955	0.0173502933122335
Paraquat	YDL062W		6	-0.0493308481690667	0.0845121952774537	0.0345019592453686
Paraquat	YDL065C	PEX19	6	-0.05293485214585	0.0170208256864311	0.00694872298876889
Paraquat	YDL066W	IDP1	6	-0.03693260478763	0.0229013493157768	0.00934943670748163
Paraquat	YDL070W	BDF2	6	0.0350497059375333	0.0299973884677876	0.0122463825603547
Paraquat	YDL071C		6	0.324343384119683	0.164914865781444	0.067326212027352
Paraquat	YDL072C	YET3	8	0.2761199852605	0.0365966162922126	0.0129388577743528
Paraquat	YDL073W	AHK1	8	-0.0305960657805175	0.0544535029421371	0.0192522205948734
Paraquat	YDL074C	BRE1	12	0.798327851240488	0.755230018571498	0.21801612726117
Paraquat	YDL075W	RPL31A	13	0.827364814262385	0.407977479343368	0.11315259392362
Paraquat	YDL076C	RXT3	6	0.412385851720167	0.119268319631832	0.0486910875961931
Paraquat	YDL077C	VAM6	6	1.84159561917167	0.0778912568534628	0.0317989724525078
Paraquat	YDL078C	MDH3	6	0.0260574013551833	0.0681757503202838	0.027832633519347
Paraquat	YDL079C	MRK1	6	0.211487246204333	0.0858221835800935	0.035036759730449
Paraquat	YDL080C	THI3	6	-0.0733043830147167	0.0642509557221643	0.026230342834243
Paraquat	YDL081C	RPP1A	6	0.2652443245005	0.0495360188171198	0.0202229949984749
Paraquat	YDL082W	RPL13A	6	0.1209951365361	0.0683006142871551	0.0278836090203628
Paraquat	YDL083C	RPS16B	6	0.125664946192383	0.0452215914367961	0.0184616373961273
Paraquat	YDL085W	NDE2	6	-0.11636082100147	0.0931635575187173	0.0380338630905481
Paraquat	YDL086W		6	-0.0133447351643333	0.0643196316796613	0.0262583796764871
Paraquat	YDL088C	ASM4	6	0.1337904157559	0.0391732142913661	0.0159923977664248
Paraquat	YDL089W	NUR1	6	0.00690355581846667	0.073848293818381	0.0301484397050271
Paraquat	YDL090C	RAM1	6	0.195712369574667	0.0689813551695106	0.0281615203218332
Paraquat	YDL091C	UBX3	6	-0.0335875362866	0.021468736832301	0.00876457511020544
Paraquat	YDL093W	PMT5	6	0.10614252510025	0.0745777609224116	0.0304462434031972
Paraquat	YDL094C		6	0.0260487627480833	0.0594344305252592	0.0242640046566303
Paraquat	YDL095W	PMT1	6	0.110462321903717	0.0498247097759075	0.0203408525888723
Paraquat	YDL096C	OPI6	6	-0.0327430697880467	0.0706737255657391	0.0288524276429252
Paraquat	YDL099W	BUG1	6	0.14757275345945	0.367232806610158	0.149922165500843
Paraquat	YDL100C	GET3	6	0.471626217738667	0.326581504980901	0.133326341105568
Paraquat	YDL104C	QRI7	6	-0.08885262323185	0.060211593346669	0.0245812800498829
Paraquat	YDL106C	PHO2	6	-0.01067785505905	0.0867022380709801	0.0353960404718685
Paraquat	YDL107W	MSS2	8	-0.0471385611534137	0.0343961548574758	0.0121608771732319
Paraquat	YDL109C		6	0.80808426111	0.0198778495509816	0.00811509809728612
Paraquat	YDL110C	TMA17	6	0.541980225771333	0.0711611658179065	0.0290514242925758
Paraquat	YDL112W	TRM3	6	0.733419644652667	0.188280518916257	0.0768651999752109
Paraquat	YDL113C	ATG20	6	-0.0245065327079533	0.017782603475586	0.00725971746890473
Paraquat	YDL114W		6	0.0699255414421333	0.0515646281021852	0.021051171271122
Paraquat	YDL116W	NUP84	8	0.2982372772705	0.06188007647965	0.0218779108495513
Paraquat	YDL117W	CYK3	6	-0.0279889490873062	0.0500692737239632	0.0204406954025752
Paraquat	YDL118W		6	-0.135296275993167	0.02665473054639	0.0108817481783386
Paraquat	YDL119C	HEM25	6	-0.0619299601082	0.0421105197156159	0.017191547684445
Paraquat	YDL121C		6	0.277449042197333	0.0412873099806018	0.0168554737174323
Paraquat	YDL122W	UBP1	6	0.877551037959167	0.249255405804731	0.101758093308658
Paraquat	YDL123W	SNA4	6	0.668444410379833	0.182420887126261	0.0744730153141972
Paraquat	YDL124W		6	0.143249404703033	0.0555043314887954	0.0226595484436403
Paraquat	YDL125C	HNT1	6	0.608606089851667	0.0840523564877479	0.0343142308455823
Paraquat	YDL127W	PCL2	6	0.467785616486167	0.11526541578986	0.0470569089458167
Paraquat	YDL128W	VCX1	6	0.739465814214	0.182673685642421	0.0745762198762515
Paraquat	YDL129W		6	-0.10520167148635	0.033462086532473	0.0136608396222359
Paraquat	YDL130W	RPP1B	6	0.454181396532667	0.249663623176646	0.10192474735288
Paraquat	YDL130W-A	STF1	6	0.0663928004159333	0.0477519633682495	0.0194946574113809
Paraquat	YDL131W	LYS21	6	0.167777488553833	0.0329997176389324	0.0134720783118844
Paraquat	YDL133C-A	RPL41B	6	0.774737753671167	0.0592462586757196	0.0241871838207423
Paraquat	YDL133W	SRF1	6	0.572743098849667	0.0806994170132036	0.0329453990370707
Paraquat	YDL134C	PPH21	6	0.375480450005083	0.348958946109693	0.142461893191354
Paraquat	YDL134C-A	NA	6	-0.0153775758669067	0.0539777998001519	0.0220363444914126
Paraquat	YDL135C	RDI1	6	0.11694417002915	0.0752704258630448	0.030729022681075
Paraquat	YDL136W	RPL35B	6	0.337362002857167	0.0682064202035063	0.0278451544467413
Paraquat	YDL137W	ARF2	6	0.424287689926167	0.100388361117081	0.0409833768085171
Paraquat	YDL138W	RGT2	6	0.159629796697917	0.0923803060312887	0.0377141020098021
Paraquat	YDL142C	CRD1	6	-0.0640919889607783	0.0936008259982863	0.0382123771998059
Paraquat	YDL144C		6	0.5345041377075	0.11515958665	0.0470137043803878
Paraquat	YDL146W	LDB17	6	0.965355185819167	0.0765347133520253	0.0312451658871061
Paraquat	YDL149W	ATG9	6	0.1145535636728	0.0435476766193462	0.0177782645335212
Paraquat	YDL151C	BUD30	16	0.114511577035619	0.0603097271606519	0.015077431790163
Paraquat	YDL154W	MSH5	6	0.0330215100798333	0.101161873992766	0.0412991621176674
Paraquat	YDL155W	CLB3	6	-0.01594515694752	0.0860050075626602	0.0351113973087876
Paraquat	YDL156W	CMR1	6	0.940877708216167	0.237897107582559	0.0971210874768775
Paraquat	YDL157C		6	0.105028367394367	0.0917281285585317	0.03744785167147
Paraquat	YDL159W	STE7	6	0.0866597474654667	0.0248417742519102	0.0101416118704316
Paraquat	YDL160C	DHH1	6	0.769653324429333	0.133964489998563	0.0546907740247764
Paraquat	YDL161W	ENT1	6	0.233128902777333	0.0561628353508595	0.0229283815195918
Paraquat	YDL162C		6	0.473448768264833	0.190015088420822	0.0775733350101402
Paraquat	YDL167C	NRP1	6	0.656013102499	0.410031493043712	0.167394656071441
Paraquat	YDL168W	SFA1	6	0.674516373397833	0.214378381282796	0.0875196076711118
Paraquat	YDL169C	UGX2	5	0.4921439229158	0.241438496043243	0.107974577907601
Paraquat	YDL170W	UGA3	6	0.0435960857505	0.118159043288971	0.048238227425568
Paraquat	YDL171C	GLT1	6	0.587623812566667	0.2357486727916	0.0962439926462953
Paraquat	YDL172C		6	0.8898973359035	0.13868518182145	0.0566179883912768
Paraquat	YDL173W	PAR32	6	0.741206994757	0.0323639399883227	0.0132125231729078
Paraquat	YDL174C	DLD1	6	0.738133465466667	0.20404825839889	0.0833023526634754
Paraquat	YDL175C	AIR2	6	0.242361806440167	0.0920032141315623	0.037560154886391
Paraquat	YDL176W		6	0.1976184632625	0.0532435262806527	0.0217365785823442
Paraquat	YDL177C		6	-0.00404582147903333	0.129287160991194	0.052781262453581
Paraquat	YDL178W	DLD2	6	0.0478273043993	0.019620686547254	0.00801011174064376
Paraquat	YDL179W	PCL9	6	0.7717228929015	0.152884174025092	0.0624147026847237
Paraquat	YDL180W		6	0.00883186175261833	0.0299811976683047	0.0122397726941446
Paraquat	YDL181W	INH1	6	0.0558621554369	0.0294197842899525	0.0120105766421887
Paraquat	YDL182W	LYS20	6	0.138704185747283	0.0550794387034622	0.0224860866903976
Paraquat	YDL183C		6	0.06646469105105	0.0823710314807037	0.0336278327857423
Paraquat	YDL184C	RPL41A	6	0.6666203099375	0.103426779079427	0.0422238057473597
Paraquat	YDL185W	VMA1	6	0.202882592173033	0.0808148303672971	0.0329925163415761
Paraquat	YDL186W		6	0.0837259057512	0.0237058151354466	0.00967785850309844
Paraquat	YDL187C		6	0.4414317929635	0.145994321012487	0.0596019319707802
Paraquat	YDL188C	PPH22	6	0.461465003845833	0.155125481804762	0.063329712754177
Paraquat	YDL189W	RBS1	6	0.05609595018385	0.149198961429354	0.0609102209425175
Paraquat	YDL190C	UFD2	6	0.544087299404167	0.131312079280463	0.0536079318835041
Paraquat	YDL191W	RPL35A	6	-0.0213889885723383	0.0239046844209559	0.00975904654893339
Paraquat	YDL192W	ARF1	6	0.00558846981869	0.0359160767521927	0.0146626769342516
Paraquat	YDL194W	SNF3	6	0.448998276347167	0.0192435499728384	0.00785614637886721
Paraquat	YDL197C	ASF2	6	0.0563784085151483	0.0415690679003082	0.0169705009064771
Paraquat	YDL198C	GGC1	14	0.0754421511719643	0.0882727617393955	0.0235918879295104
Paraquat	YDL199C		6	0.659266185424167	0.048945594997546	0.0199819554834848
Paraquat	YDL200C	MGT1	6	0.105492801472	0.0268234741700312	0.0109506374742168
Paraquat	YDL201W	TRM8	6	0.07856097919435	0.0280932932955361	0.0114690389614025
Paraquat	YDL203C	ACK1	6	0.49417706328	0.230312573766826	0.0940247145126392
Paraquat	YDL204W	RTN2	6	0.300804967619	0.0663225943097891	0.0270760857460997
Paraquat	YDL206W		6	0.737879282021333	0.0639366165763716	0.0261020144153472
Paraquat	YDL210W	UGA4	6	0.0186157527150833	0.04818075665515	0.0196697115377204
Paraquat	YDL211C		6	-0.0114192365878833	0.0611227271076455	0.0249532488501855
Paraquat	YDL213C	NOP6	6	0.5620587002055	0.0920489041308003	0.0375788077504713
Paraquat	YDL214C	PRR2	6	0.597332051202167	0.0443294984084086	0.0180974419423534
Paraquat	YDL215C	GDH2	6	-0.0077152614359065	0.0438438994522268	0.0178991969986411
Paraquat	YDL216C	RRI1	6	0.0358600447380667	0.0760557026460698	0.0310496105852859
Paraquat	YDL218W		6	0.124689091170667	0.0582951643869989	0.0237989012033022
Paraquat	YDL219W	DTD1	6	0.627122601849167	0.0709415944258262	0.0289617846471243
Paraquat	YDL222C	FMP45	6	0.752171663935167	0.0963429561545892	0.0393318471483459
Paraquat	YDL223C	HBT1	6	0.871180696958833	0.188545273508451	0.0769732855848667
Paraquat	YDL224C	WHI4	6	0.218806763935	0.12568906152677	0.0513123444983113
Paraquat	YDL225W	SHS1	16	0.1060906868598	0.0611861175708998	0.0152965293927249
Paraquat	YDL226C	GCS1	6	0.461557071011667	0.117733587214452	0.048064535710478
Paraquat	YDL227C	HO	6	0.190202749718667	0.0459401012415243	0.0187549677955891
Paraquat	YDL229W	SSB1	6	0.0428642859324	0.0420561803557921	0.017169363733692
Paraquat	YDL230W	PTP1	6	-0.09586491061085	0.0306499432189218	0.0125127869219393
Paraquat	YDL231C	BRE4	6	-0.0335173780239667	0.0515745029479653	0.0210552026600303
Paraquat	YDL232W	OST4	6	0.2930479164705	0.0219131503285019	0.00894600616028856
Paraquat	YDL233W	MFG1	6	0.0535415286503817	0.0834790557605341	0.0340801818037756
Paraquat	YDL234C	GYP7	6	-0.0428943376074667	0.110225145097872	0.0449992270523375
Paraquat	YDL236W	PHO13	6	0.116753688595117	0.088714561927169	0.0362175682460173
Paraquat	YDL237W	AIM6	6	0.0714467459293333	0.0730691456374988	0.0298303537921639
Paraquat	YDL238C	GUD1	6	0.948429631698667	0.17814426896203	0.0727270932596832
Paraquat	YDL239C	ADY3	6	-0.1056007895379	0.0948195371178292	0.0387099139309286
Paraquat	YDL240W	LRG1	6	0.0104326003333217	0.0321811329721116	0.0131378925210548
Paraquat	YDL241W		6	0.820055584513	0.0590069106215211	0.0240894703867899
Paraquat	YDL242W		6	0.643973628234333	0.207765296728376	0.0848198272070766
Paraquat	YDL243C	AAD4	6	-0.00129394584286667	0.0753017743417521	0.0307418206439159
Paraquat	YDR001C	NTH1	6	0.252963893726667	0.071116677965251	0.0290332622027828
Paraquat	YDR003W	RCR2	6	0.838445124132167	0.0266186634318885	0.0108670238405014
Paraquat	YDR004W	RAD57	6	0.896757215180833	0.0845400942061227	0.0345133489353035
Paraquat	YDR005C	MAF1	6	0.128735877882938	0.123690462806412	0.0504964199874016
Paraquat	YDR006C	SOK1	6	-0.00457200479781667	0.0768659480330907	0.0313803918793934
Paraquat	YDR007W	TRP1	6	0.468738422161833	0.171065885047054	0.0698373551271475
Paraquat	YDR008C		6	0.0772324664029133	0.0882270785437261	0.0360185539880972
Paraquat	YDR009W	GAL3	6	0.825285994073667	0.149320563983737	0.0609598649774606
Paraquat	YDR010C		6	0.0628100914945	0.0394666427829002	0.016112189446467
Paraquat	YDR011W	SNQ2	6	0.588179396641	0.20509673741918	0.0837303924310959
Paraquat	YDR014W	RAD61	6	0.705057709344833	0.03662723836847	0.0149530074483403
Paraquat	YDR015C		6	0.0635099506577833	0.0381868247314829	0.015589705914871
Paraquat	YDR017C	KCS1	16	0.232523711072681	0.131249227266152	0.0328123068165379
Paraquat	YDR018C		6	0.143156514166548	0.125459951009042	0.0512188105211212
Paraquat	YDR019C	GCV1	6	0.0670742554543683	0.071528492446505	0.029201384760743
Paraquat	YDR020C	DAS2	6	0.0219253263394333	0.152549156499548	0.0622779323526449
Paraquat	YDR022C	ATG31	6	-0.0457419900549878	0.0515856816652875	0.0210597663522667
Paraquat	YDR024W	FYV1	6	-0.0990020520438933	0.0608395584051363	0.0248376457114733
Paraquat	YDR025W	RPS11A	6	0.328053205775333	0.148370524750754	0.0605720130847217
Paraquat	YDR026C	NSI1	6	0.678766477269833	0.186037772821398	0.0759496027160403
Paraquat	YDR029W		6	0.516413769600333	0.116309298643174	0.0474830723361267
Paraquat	YDR030C	RAD28	6	0.112265704782768	0.0808042160480489	0.0329881830638886
Paraquat	YDR031W	MIX14	6	0.0377854206811833	0.0576493175240389	0.0235352353255973
Paraquat	YDR032C	PST2	6	0.0676514878552667	0.0293787937004101	0.0119938423040829
Paraquat	YDR033W	MRH1	6	0.165586163014933	0.0656530918576107	0.0268027625145365
Paraquat	YDR034C	LYS14	6	0.621007356349333	0.106465063286461	0.0434641800808247
Paraquat	YDR035W	ARO3	6	0.0606656841631833	0.041289445211292	0.0168563454217113
Paraquat	YDR036C	EHD3	6	0.145569455545333	0.0858495649800954	0.0350479381401903
Paraquat	YDR042C		6	-0.0354270618253	0.0325728967025739	0.0132978293942818
Paraquat	YDR043C	NRG1	6	0.12680457386405	0.0642391947440796	0.0262255414350457
Paraquat	YDR046C	BAP3	6	-0.176121264634017	0.0823550296804268	0.0336213000781349
Paraquat	YDR048C		6	-0.0614525187521167	0.0367323335383109	0.0149959123717638
Paraquat	YDR049W	VMS1	6	0.0596732796716833	0.120191167704848	0.0490678387443596
Paraquat	YDR051C	DET1	6	0.0277331512712767	0.0509406663588805	0.020796439956103
Paraquat	YDR055W	PST1	6	-2.92801590449996e-05	0.0342673912832075	0.0139896039100257
Paraquat	YDR056C	EMC10	6	0.633987296165167	0.0458333704737454	0.0187113951421035
Paraquat	YDR057W	YOS9	6	0.0791812635482367	0.0466349931965208	0.0190386562482735
Paraquat	YDR058C	TGL2	6	0.659945521200333	0.0242616779543971	0.00990478854866739
Paraquat	YDR059C	UBC5	6	0.0438425684365667	0.126900513124385	0.0518069175420172
Paraquat	YDR061W		6	-0.1097657296021	0.0519595985039386	0.0212124172624216
Paraquat	YDR063W	AIM7	6	-0.0175430780253333	0.107050759918177	0.0437032897294532
Paraquat	YDR066C	RTR2	6	-0.00799232688631166	0.0675066135385859	0.0275594595721324
Paraquat	YDR067C	OCA6	6	0.0875413119753033	0.106773585525282	0.0435901337573933
Paraquat	YDR068W	DOS2	6	0.0639069770822167	0.0217003275010387	0.00885912160480501
Paraquat	YDR070C	FMP16	6	-0.0859279449344833	0.0525580763640285	0.0214567448256838
Paraquat	YDR071C	PAA1	6	0.645569732123667	0.113464333657034	0.0463216202441054
Paraquat	YDR072C	IPT1	6	0.367359783876	0.0509337584701701	0.0207936198223462
Paraquat	YDR073W	SNF11	5	0.4769340323288	0.0360734554306259	0.0161325397052377
Paraquat	YDR074W	TPS2	6	1.24958472724333	0.183190374039033	0.0747871570308707
Paraquat	YDR075W	PPH3	6	0.0319425593164667	0.0407088540509334	0.0166193200730365
Paraquat	YDR076W	RAD55	6	0.7675040300455	0.0891044775361529	0.0363767506268101
Paraquat	YDR077W	SED1	6	0.116110851551167	0.0201177128228476	0.00821302186797046
Paraquat	YDR080W	VPS41	6	1.36459088386167	0.15599679183144	0.0636854235830325
Paraquat	YDR083W	RRP8	6	0.848570801640833	0.0609042591157783	0.0248640596659846
Paraquat	YDR084C	TVP23	6	-0.0739606687848833	0.0871093678808312	0.0355622505207371
Paraquat	YDR085C	AFR1	6	-0.11851703481665	0.0846523195756652	0.0345591647505659
Paraquat	YDR089W		6	-0.0430070983645883	0.0685460542621319	0.0279838094705585
Paraquat	YDR090C		6	0.13133174685025	0.0252832262284892	0.0103218338851918
Paraquat	YDR092W	UBC13	5	1.461382221482	0.0750887862748746	0.0335807260917146
Paraquat	YDR093W	DNF2	6	0.106164839782917	0.0295078427431828	0.0120465263551809
Paraquat	YDR094W		6	0.0519839445978807	0.0443998699208494	0.0181261709920047
Paraquat	YDR095C		6	-0.00296410148118833	0.0509315083532087	0.0207927012159434
Paraquat	YDR096W	GIS1	6	-0.00599869180228333	0.141975955971694	0.0579614413124169
Paraquat	YDR097C	MSH6	6	0.680674821167667	0.050354358213984	0.0205570806582639
Paraquat	YDR098C	GRX3	6	0.2435191843425	0.0751852702786172	0.030694258059309
Paraquat	YDR099W	BMH2	6	0.0987421876198833	0.0676722717173258	0.0276270892404043
Paraquat	YDR100W	TVP15	6	-0.0539162249726457	0.0436739526512376	0.0178298165076675
Paraquat	YDR101C	ARX1	6	0.0889020954665333	0.0156798543716433	0.00640127374194571
Paraquat	YDR102C		6	-0.0599376934717833	0.0629647210225438	0.0257052397169876
Paraquat	YDR103W	STE5	6	1.03286066731167	0.208464176123521	0.0851051435253851
Paraquat	YDR104C	SPO71	5	0.2280903320786	0.0608707456193606	0.0272222250091976
Paraquat	YDR105C	TMS1	6	0.15249820286345	0.199961096834318	0.0816337759418892
Paraquat	YDR107C	TMN2	6	-0.00192689599109167	0.120336109680958	0.0491270110583231
Paraquat	YDR108W	TRS85	6	0.2019717796061	0.085880653814154	0.0350606301035472
Paraquat	YDR109C		6	0.892453559078333	0.22467501909749	0.0917231924564863
Paraquat	YDR110W	FOB1	6	0.0695108341500833	0.0543689631416259	0.0221960362568616
Paraquat	YDR111C	ALT2	6	0.1097561116755	0.059833080995176	0.0244267530294665
Paraquat	YDR112W	IRC2	6	-0.120804984613917	0.0475384145281993	0.0194074764624998
Paraquat	YDR114C		8	-0.0416172940040993	0.0463162168329371	0.0163752555007382
Paraquat	YDR115W	MRX14	8	-0.065095943530275	0.0354526565574354	0.0125344069314202
Paraquat	YDR116C	MRPL1	6	0.0154985343698217	0.0365554602012777	0.0149237041342914
Paraquat	YDR117C	TMA64	6	0.2029518293225	0.056166576602883	0.0229299088793346
Paraquat	YDR119W	VBA4	5	0.06739930638248	0.0335901206006526	0.015021958607095
Paraquat	YDR120C	TRM1	6	0.123605081204533	0.0901771145149753	0.0368146528397027
Paraquat	YDR121W	DPB4	6	0.6464189327025	0.119216533630069	0.0486699460495031
Paraquat	YDR122W	KIN1	6	0.0225574179777667	0.036444639250522	0.0148784616705978
Paraquat	YDR123C	INO2	6	2.45498083027667	0.142203595166881	0.0580543746246943
Paraquat	YDR124W		6	0.13783932863155	0.0753358993103369	0.0307557521040027
Paraquat	YDR125C	ECM18	6	-0.0468150445227333	0.0456634943400682	0.0186420435009391
Paraquat	YDR126W	SWF1	6	1.25665062866333	0.0548217060396408	0.0223808677709958
Paraquat	YDR127W	ARO1	6	0.178995520516667	0.042356033762776	0.017291778374483
Paraquat	YDR128W	MTC5	6	0.426101568091	0.0712209167394292	0.0290758175041411
Paraquat	YDR129C	SAC6	8	0.490798312380875	0.13647119303362	0.0482498530153455
Paraquat	YDR130C	FIN1	6	-0.0101117594041833	0.0671779283117404	0.027425274390172
Paraquat	YDR131C		5	0.1208541000331	0.064375396216327	0.028789552403638
Paraquat	YDR132C		6	0.385192709411167	0.0814593783535455	0.033255651955084
Paraquat	YDR133C		6	0.0891207364605667	0.136571011194486	0.0557548818470701
Paraquat	YDR134C		6	0.131771706455967	0.0929011340079082	0.0379267291408828
Paraquat	YDR135C	YCF1	6	1.04626746733633	0.209542567729544	0.0855453950549946
Paraquat	YDR136C	VPS61	8	0.298517881604	0.0590900981039608	0.0208915045351445
Paraquat	YDR137W	RGP1	16	0.1075549579972	0.0877405489179258	0.0219351372294814
Paraquat	YDR139C	RUB1	6	0.0942232835831667	0.0325749561879359	0.0132986701756601
Paraquat	YDR140W	MTQ2	16	1.07589104500869	0.737270070802774	0.184317517700693
Paraquat	YDR142C	PEX7	6	0.8204487362935	0.148439555795074	0.0606001948905541
Paraquat	YDR143C	SAN1	6	0.781973130478333	0.0645624532562262	0.0263575111700074
Paraquat	YDR144C	MKC7	6	0.340441389104833	0.0876453675466622	0.0357810714680018
Paraquat	YDR146C	SWI5	6	0.295475360557	0.0703756645460292	0.0287307447411747
Paraquat	YDR147W	EKI1	6	0.04963873445427	0.0296229425378974	0.0120935156496059
Paraquat	YDR148C	KGD2	5	0.237034163709	0.0472615287892597	0.0211359982186696
Paraquat	YDR149C		6	0.200144283149	0.084929010372949	0.0346721232955441
Paraquat	YDR150W	NUM1	6	0.2233296179465	0.14460493433281	0.0590347172340087
Paraquat	YDR151C	CTH1	6	0.3555400815035	0.133265636140724	0.0544054681320296
Paraquat	YDR152W	GIR2	6	-0.0155225221414917	0.0346888240559234	0.0141616531190324
Paraquat	YDR153C	ENT5	6	0.783190495090667	0.100554736217494	0.0410512991588365
Paraquat	YDR154C		6	-0.00756467877831667	0.0457587432734368	0.0186809287151554
Paraquat	YDR155C	CPR1	6	-0.109120098296567	0.078507143047511	0.0320504069383483
Paraquat	YDR156W	RPA14	6	0.207762695559757	0.149716863883657	0.0611216537341139
Paraquat	YDR157W		6	0.0446962282341333	0.0432070967242727	0.0176392233735911
Paraquat	YDR158W	HOM2	6	0.396475269489833	0.0526385556361044	0.0214896003509265
Paraquat	YDR159W	SAC3	4	0.4860513582785	0.131742394457192	0.0658711972285962
Paraquat	YDR161W	ACL4	6	0.253161523187167	0.0918565396614717	0.0375002752847218
Paraquat	YDR162C	NBP2	6	0.8042388787655	0.0474392089466942	0.0193669759534459
Paraquat	YDR163W	CWC15	6	0.0359153134544067	0.0711260515201781	0.0290370889405574
Paraquat	YDR165W	TRM82	6	-0.00743874319375	0.0994751403838782	0.0406105560053711
Paraquat	YDR169C	STB3	6	-0.07310953048657	0.0702196263004293	0.0286670423941616
Paraquat	YDR171W	HSP42	6	-0.0207963583282733	0.0439273776050431	0.0179332768118194
Paraquat	YDR173C	ARG82	6	0.199191222472	0.0490437654164669	0.0200220333891834
Paraquat	YDR174W	HMO1	6	0.184704698328167	0.0161022350886999	0.00657370994760898
Paraquat	YDR175C	RSM24	16	0.0641107969443938	0.0447071497744736	0.0111767874436184
Paraquat	YDR176W	NGG1	16	0.875556216444753	0.848848569540272	0.212212142385068
Paraquat	YDR178W	SDH4	6	0.0977717016965833	0.0564687314831991	0.0230532630926789
Paraquat	YDR179C	CSN9	6	0.00932808490323333	0.0507377372801251	0.0207135945066157
Paraquat	YDR179W-A	NVJ3	6	0.0783627790009167	0.0576907925641306	0.0235521674398116
Paraquat	YDR181C	SAS4	6	0.581517680505667	0.0771200868059955	0.0314841435989724
Paraquat	YDR183W	PLP1	6	0.631934999646167	0.0365328147258579	0.0149144591576645
Paraquat	YDR184C	ATC1	6	0.01709413913036	0.0244969452970175	0.0100008360390942
Paraquat	YDR185C	UPS3	6	-0.0189529900187667	0.0702346532922155	0.0286731771378691
Paraquat	YDR186C		6	0.1922470355476	0.149454536496509	0.061014559026769
Paraquat	YDR191W	HST4	6	0.146387755893617	0.121323804900055	0.0495302359430187
Paraquat	YDR192C	NUP42	6	0.0150743185829	0.0874776754936025	0.0357126114740158
Paraquat	YDR193W		6	0.661327058973667	0.0553062843275976	0.02257869602865
Paraquat	YDR198C	RKM2	6	0.118050878204783	0.0343368360829362	0.0140179546307966
Paraquat	YDR199W		6	0.00710846984287667	0.0338015254928771	0.0137994149975378
Paraquat	YDR202C	RAV2	6	0.257393699683667	0.0750194479621853	0.0306265613821049
Paraquat	YDR203W		6	0.187524014509833	0.0323560702295478	0.0132093103573416
Paraquat	YDR204W	COQ4	8	0.240143626609375	0.0341641902108613	0.0120788652859235
Paraquat	YDR205W	MSC2	6	0.705156021651167	0.0741095508738551	0.030255097451296
Paraquat	YDR206W	EBS1	6	0.207821173424667	0.087919390897479	0.0358929410325199
Paraquat	YDR207C	UME6	6	0.361565829951833	0.0637778774326601	0.0260372094312973
Paraquat	YDR209C		6	0.1026230664146	0.0542944356559739	0.0221656105382515
Paraquat	YDR210W		6	-0.04984364771747	0.0793639023231542	0.0324001774479687
Paraquat	YDR213W	UPC2	6	-0.149952267807333	0.0146708310994048	0.00598934171601609
Paraquat	YDR214W	AHA1	5	-0.02410195684109	0.0474401789087662	0.0212158929809506
Paraquat	YDR215C		6	0.2618335205245	0.0960248721487974	0.0392019898967576
Paraquat	YDR216W	ADR1	6	0.102821890689217	0.040321097031371	0.0164610189326847
Paraquat	YDR217C	RAD9	6	0.329286664722167	0.0461353737962801	0.0188346874822426
Paraquat	YDR218C	SPR28	6	0.04237478325735	0.0531008178195772	0.0216783180970754
Paraquat	YDR219C	MFB1	6	-0.00569987174855	0.0754688946724204	0.0308100472332129
Paraquat	YDR220C		6	0.688199871277333	0.0479080923968712	0.0195583968204075
Paraquat	YDR221W	GTB1	6	0.867385285273667	0.162642907583662	0.0663986889771021
Paraquat	YDR222W		6	0.857424066108333	0.111588697728646	0.0455558950828084
Paraquat	YDR223W	CRF1	6	0.0311972698305833	0.064736012377005	0.0264283663843598
Paraquat	YDR225W	HTA1	6	-0.138812048783033	0.060344483550714	0.0246355322485037
Paraquat	YDR226W	ADK1	8	0.80500149591225	0.074888420785315	0.0264770550848239
Paraquat	YDR227W	SIR4	6	0.220619465252667	0.0901577060048059	0.0368067293486056
Paraquat	YDR229W	IVY1	6	-0.0114828376105667	0.0425566132694569	0.0173736646151875
Paraquat	YDR230W		8	0.170557272851625	0.022107838151814	0.00781630113726117
Paraquat	YDR231C	COX20	8	0.17109710525425	0.0477087214113824	0.0168675802158642
Paraquat	YDR233C	RTN1	6	0.153948239749933	0.0403499670829896	0.0164728050819036
Paraquat	YDR234W	LYS4	6	-0.103612035141217	0.0345098508045602	0.0140885875951247
Paraquat	YDR237W	MRPL7	16	0.0943087288315937	0.139484978763709	0.0348712446909272
Paraquat	YDR239C		6	0.611330668342333	0.0580052631334636	0.0236805495121431
Paraquat	YDR241W	BUD26	6	0.132527003179767	0.0608425972567348	0.0248388863174433
Paraquat	YDR242W	AMD2	6	-0.0362511743619667	0.190938257939541	0.0779502173879657
Paraquat	YDR244W	PEX5	6	0.905770635521167	0.157035025490742	0.0641092806995447
Paraquat	YDR245W	MNN10	6	-0.0599557084958667	0.120037030884667	0.0490049126510234
Paraquat	YDR247W	VHS1	6	0.179684703147167	0.126466805997242	0.0516298573487989
Paraquat	YDR248C		6	0.848240220621667	0.130539109318862	0.0532923682181007
Paraquat	YDR249C		6	0.146956661867117	0.0925813800037551	0.0377961901153183
Paraquat	YDR250C		6	-0.0888851638774333	0.0274908938256571	0.0112231104076481
Paraquat	YDR251W	PAM1	6	0.607954270892333	0.0246401432023901	0.0100592963391605
Paraquat	YDR252W	BTT1	6	0.0266193524083867	0.0359472089390118	0.0146753865962989
Paraquat	YDR253C	MET32	6	1.41180034400667	0.0563271679774674	0.0229954700334719
Paraquat	YDR254W	CHL4	5	0.2877050877624	0.0842192928531654	0.037664012767328
Paraquat	YDR255C	RMD5	6	0.114796603375033	0.0447687392808654	0.0182767612776357
Paraquat	YDR256C	CTA1	6	0.1795160563865	0.0736049557518193	0.0300490973553485
Paraquat	YDR257C	RKM4	6	0.215192032273717	0.152945434458837	0.0624397121520729
Paraquat	YDR258C	HSP78	6	0.94872943933	0.126412114420516	0.0516075296060979
Paraquat	YDR259C	YAP6	6	0.0388903294084667	0.0928150510062603	0.037891585902622
Paraquat	YDR260C	SWM1	6	0.11044729628925	0.0831225999657301	0.0339346593349209
Paraquat	YDR261C	EXG2	6	-0.0194634126224417	0.0590120440962854	0.0240915661190866
Paraquat	YDR262W		6	-0.0361223887348083	0.0891791500881083	0.0364072355684905
Paraquat	YDR263C	DIN7	6	0.117491091271633	0.0495609122782352	0.020233157711419
Paraquat	YDR264C	AKR1	16	1.07737375811778	0.767443124637621	0.191860781159405
Paraquat	YDR265W	PEX10	6	0.719329471994667	0.0166418326964515	0.00679399974851194
Paraquat	YDR266C	HEL2	6	0.176072597165433	0.121516442703554	0.0496088799969761
Paraquat	YDR268W	MSW1	16	0.123553548231999	0.0911004932305144	0.0227751233076286
Paraquat	YDR269C		6	0.591192575333333	0.221028913819333	0.0902346762098271
Paraquat	YDR270W	CCC2	6	0.248111861354667	0.113780746148559	0.0464507951028522
Paraquat	YDR271C		6	0.504335567107333	0.127051443882828	0.05186853476613
Paraquat	YDR272W	GLO2	6	0.8062224551355	0.0441545291236707	0.0180260110309754
Paraquat	YDR273W	DON1	6	0.912187017521	0.114869015664368	0.0468950792722449
Paraquat	YDR274C		6	0.187964492609083	0.123892943090778	0.0505790822173469
Paraquat	YDR275W	BSC2	6	0.00245871609576667	0.0536987602303938	0.0219224270640871
Paraquat	YDR276C	PMP3	0	NA	NA	NA
Paraquat	YDR277C	MTH1	6	0.640810070481167	0.128886264821665	0.0526175972777176
Paraquat	YDR278C		6	-0.0489959417080333	0.0361909223311545	0.0147748821720043
Paraquat	YDR279W	RNH202	6	0.104866281095383	0.0563316609056709	0.0229973042637302
Paraquat	YDR281C	PHM6	6	0.158829494157333	0.0406421265243516	0.0165920786743826
Paraquat	YDR282C	MRX10	6	-0.0184557127413	0.0657809476932256	0.0268549594408522
Paraquat	YDR283C	GCN2	16	0.143116011885725	0.0764240307475165	0.0191060076868791
Paraquat	YDR284C	DPP1	6	0.171019226782667	0.108706250839758	0.0443791410680671
Paraquat	YDR285W	ZIP1	6	0.0183947401319	0.0800453712743162	0.0326783859822848
Paraquat	YDR286C		6	0.005093599534465	0.0339142235053852	0.0138454237684829
Paraquat	YDR287W	INM2	6	-0.1184960163196	0.0788330110796214	0.0321834420053742
Paraquat	YDR289C	RTT103	6	0.020938329569	0.0710357398313311	0.0290002193479767
Paraquat	YDR290W		6	0.3663829570865	0.0835987423408646	0.0341290436455869
Paraquat	YDR291W	HRQ1	6	-0.02814694915235	0.111669053136967	0.045588700040885
Paraquat	YDR293C	SSD1	6	-0.0613498513936152	0.0718739445315286	0.0293424149838911
Paraquat	YDR294C	DPL1	6	0.452569453991	0.0446984255447881	0.018248055815086
Paraquat	YDR297W	SUR2	6	0.167929688592	0.0397946764156055	0.0162461086162335
Paraquat	YDR304C	CPR5	5	0.07905235540618	0.0675221601950436	0.0301968280367496
Paraquat	YDR305C	HNT2	6	0.619246813410833	0.0324956234865746	0.0132662827359515
Paraquat	YDR306C		6	0.04134900533825	0.0710154861184119	0.0289919508043019
Paraquat	YDR307W	PMT7	6	0.711078073647167	0.0185010793532461	0.00755303401769899
Paraquat	YDR309C	GIC2	6	-0.042115172570825	0.0481422049084306	0.0196539728530278
Paraquat	YDR310C	SUM1	6	0.0161573430329167	0.0335662034900273	0.0137033451921658
Paraquat	YDR312W	SSF2	6	0.5925498638755	0.0441450421646152	0.0180221379961593
Paraquat	YDR313C	PIB1	6	0.138467668890167	0.0650121192233253	0.0265410865323554
Paraquat	YDR314C	RAD34	6	0.133922495678937	0.117847726761453	0.0481111329854158
Paraquat	YDR315C	IPK1	6	0.0874338898179833	0.0332530745840279	0.0135755108515967
Paraquat	YDR316W	OMS1	6	-0.077811202564705	0.0382745236929006	0.0156255088659453
Paraquat	YDR317W	HIM1	5	0.05035208802192	0.0250887486338067	0.0112200294831193
Paraquat	YDR318W	MCM21	6	0.261669704274833	0.0371834860489315	0.0151800946129632
Paraquat	YDR319C	YFT2	6	0.514180587646167	0.0371638011121824	0.0151720582711875
Paraquat	YDR320C	SWA2	6	0.191852004045533	0.0922419755720886	0.0376576288363146
Paraquat	YDR321W	ASP1	6	0.190051086905667	0.0362489147707205	0.0147985574863169
Paraquat	YDR322W	MRPL35	16	0.138388410599587	0.168715379248159	0.0421788448120397
Paraquat	YDR323C	PEP7	16	0.65195574980185	0.436323298371251	0.109080824592813
Paraquat	YDR326C	YSP2	6	0.528019766216	0.177621765067895	0.072513781938142
Paraquat	YDR329C	PEX3	6	0.0339350722154283	0.0443044208762774	0.0180872040827317
Paraquat	YDR330W	UBX5	6	0.03512543724265	0.0614159417995815	0.0250729532469072
Paraquat	YDR332W	IRC3	6	0.041315354097415	0.0527913223982811	0.0215519671204249
Paraquat	YDR333C	RQC1	6	0.0899795109707833	0.0465054622321011	0.018985775453487
Paraquat	YDR334W	SWR1	6	0.279943276274833	0.0204745880422245	0.00835871556619002
Paraquat	YDR335W	MSN5	6	0.0160009410944483	0.025440179044125	0.0103859096038586
Paraquat	YDR336W	MRX8	5	0.1956942539254	0.0439680829253353	0.0196631244522795
Paraquat	YDR337W	MRPS28	12	-0.05526347154173	0.0882001861179887	0.0254612005988979
Paraquat	YDR338C		6	0.72016116164	0.0396919020251437	0.016204151147024
Paraquat	YDR340W		6	0.0475677702311333	0.0892696130824579	0.0364441669312839
Paraquat	YDR344C		6	-0.0218294613847667	0.0473720825383485	0.0193395717119938
Paraquat	YDR345C	HXT3	6	0.886596560183667	0.187999788215351	0.0767505921464855
Paraquat	YDR346C	SVF1	6	0.0992112838558933	0.109084885804858	0.0445337181452789
Paraquat	YDR347W	MRP1	12	0.0855826358101833	0.117167073999032	0.0338232208567511
Paraquat	YDR348C	PAL1	6	0.463364615508667	0.161736324661871	0.0660285780491172
Paraquat	YDR349C	YPS7	6	0.1360103362368	0.070797208432197	0.0289028393120582
Paraquat	YDR350C	ATP22	20	0.234465551117587	0.141095642315724	0.0315499447546955
Paraquat	YDR351W	SBE2	6	-0.116894815531967	0.0592072263020055	0.0241712489209008
Paraquat	YDR352W	YPQ2	6	-0.00524004092491667	0.079613118849313	0.0325019196687284
Paraquat	YDR354W	TRP4	6	-0.07361085951465	0.0284084578526782	0.0115977043530706
Paraquat	YDR357C	CNL1	5	0.1927611610654	0.0670316444427518	0.0299774627235178
Paraquat	YDR358W	GGA1	6	0.156655046537033	0.112879253935404	0.0460827624479648
Paraquat	YDR359C	EAF1	6	0.398936694768833	0.0670252850058875	0.0273629580215068
Paraquat	YDR360W	OPI7	6	0.235976818963833	0.0370114545322143	0.0151098630403575
Paraquat	YDR363W	ESC2	6	1.1422166762955	0.32361786038793	0.132116438266946
Paraquat	YDR363W-A	SEM1	6	0.280003561383667	0.0575755442976447	0.0235051175320399
Paraquat	YDR364C	CDC40	19	0.760530183471577	0.731652460356332	0.16785258613085
Paraquat	YDR368W	YPR1	6	0.0318361264507667	0.029485048800875	0.0120372207672008
Paraquat	YDR369C	XRS2	6	0.355883557337167	0.0449770752530926	0.0183618140821396
Paraquat	YDR370C	DXO1	6	0.0269486963436	0.023471534302966	0.0095822137537498
Paraquat	YDR371W	CTS2	6	0.00436861853079	0.0466676578034389	0.0190519915182065
Paraquat	YDR372C	VPS74	6	0.065192621459175	0.0638540094328758	0.0260682901902349
Paraquat	YDR374C	PHO92	5	0.06454776769286	0.0227084658524875	0.010155534662179
Paraquat	YDR375C	BCS1	6	0.06125350337475	0.0261124294354774	0.0106603546768919
Paraquat	YDR377W	ATP17	12	0.000354583417491669	0.108680292265443	0.0313732979975304
Paraquat	YDR378C	LSM6	6	0.5514630310425	0.0830590414274374	0.0339087116703185
Paraquat	YDR379W	RGA2	6	-0.00219583751563333	0.0407612986003902	0.0166407304706963
Paraquat	YDR380W	ARO10	6	0.1891657985595	0.0826769285064515	0.0337527147235619
Paraquat	YDR382W	RPP2B	6	0.276767031577	0.0241061793350981	0.0098413065031691
Paraquat	YDR383C	NKP1	6	0.00943942486166667	0.052418726341166	0.0213998554170741
Paraquat	YDR384C	ATO3	6	0.900221663383333	0.0821610741207186	0.0335421180524581
Paraquat	YDR385W	EFT2	6	0.0446201701994133	0.0516418519033479	0.0210826977559298
Paraquat	YDR386W	MUS81	6	0.047670975994805	0.0315274790427965	0.012871039421857
Paraquat	YDR387C		6	0.659920694021333	0.0302760306265418	0.0123601377453173
Paraquat	YDR388W	RVS167	5	1.819083524606	0.314796925982525	0.140781465120979
Paraquat	YDR389W	SAC7	6	0.516903375602	0.110531235984345	0.0451241881334665
Paraquat	YDR391C		6	0.00550335517166667	0.14660710630967	0.0598521005207766
Paraquat	YDR392W	SPT3	6	-0.114057208648517	0.102026853153524	0.0416522883813339
Paraquat	YDR393W	SHE9	6	0.175254203140333	0.0269031241184599	0.0109831544294984
Paraquat	YDR395W	SXM1	6	-0.0396914654829833	0.0815437282315229	0.0332900876485691
Paraquat	YDR399W	HPT1	6	0.0653757082402133	0.0400477370867804	0.0163494202026243
Paraquat	YDR400W	URH1	6	0.106337262123167	0.0334419904104235	0.0136526354147643
Paraquat	YDR401W		6	-0.08835350419055	0.0380509617838488	0.0155342400987621
Paraquat	YDR402C	DIT2	6	-0.0113762714788407	0.0303455232679693	0.0123885079973799
Paraquat	YDR403W	DIT1	6	-0.0468809624307683	0.0393575705761152	0.0160676609045098
Paraquat	YDR405W	MRP20	16	0.50183571867705	0.832441270411914	0.208110317602978
Paraquat	YDR406W	PDR15	5	0.006203952547801	0.0337221709160041	0.0150810133034103
Paraquat	YDR408C	ADE8	6	0.507969634978667	0.0347602044043389	0.0141907940242458
Paraquat	YDR409W	SIZ1	6	0.01566091651635	0.108244066153668	0.0441904549600925
Paraquat	YDR410C	STE14	6	0.169517676256233	0.109231982458289	0.0445937701025752
Paraquat	YDR411C	DFM1	6	0.0337630585024	0.0779595812130301	0.0318268657554982
Paraquat	YDR414C	ERD1	6	-0.297208802595	0.0456097935296722	0.0186201202368984
Paraquat	YDR415C		6	-0.10785680061565	0.0509618295031505	0.0208050797735721
Paraquat	YDR419W	RAD30	6	-0.06691383812585	0.0683619294362596	0.0279086408251642
Paraquat	YDR420W	HKR1	6	0.549119454827167	0.185487660493474	0.0757250202986023
Paraquat	YDR421W	ARO80	6	-0.0943642513793167	0.0371911450866351	0.0151832214020123
Paraquat	YDR422C	SIP1	6	0.02053013923772	0.0358243795880277	0.0146252417237408
Paraquat	YDR423C	CAD1	6	0.0352532992262833	0.0495114936969061	0.0202129826600742
Paraquat	YDR424C	DYN2	6	0.0517985465528317	0.0383507436152536	0.0156566255189452
Paraquat	YDR425W	SNX41	6	0.0436456215632	0.0490841625342428	0.020038525443455
Paraquat	YDR426C		6	0.0829303412039167	0.0453260651726528	0.0185042886201891
Paraquat	YDR428C	BNA7	6	0.812768619594333	0.0800977821117813	0.0326997826170817
Paraquat	YDR430C	CYM1	6	0.0620285319596623	0.0401005945844613	0.0163709991856908
Paraquat	YDR431W		6	0.760872417848	0.0732540673301615	0.0299058477570632
Paraquat	YDR435C	PPM1	6	-0.0919745565481833	0.0393169634197702	0.0160510831023514
Paraquat	YDR436W	PPZ2	6	0.3242424834765	0.0607315037026201	0.0247935325638944
Paraquat	YDR438W	THI74	6	0.0556712115505333	0.0428234050382527	0.0174825818987083
Paraquat	YDR439W	LRS4	6	0.355620443112667	0.0842418768408708	0.0343916022057528
Paraquat	YDR440W	DOT1	6	-0.0112252383897833	0.0636287242159207	0.0259763178855462
Paraquat	YDR441C	APT2	6	0.3346224913335	0.0407823206461562	0.0166493126849424
Paraquat	YDR444W		6	0.0374728016892233	0.0854896916634771	0.0349010204738973
Paraquat	YDR445C		6	0.653221061088833	0.0492256332746791	0.0200962806313888
Paraquat	YDR446W	ECM11	6	0.0602953050928167	0.0325322658467298	0.0132812419168434
Paraquat	YDR447C	RPS17B	6	0.204870133187	0.0421182634908411	0.0171947090674424
Paraquat	YDR448W	ADA2	16	0.324924925885957	0.275256305876205	0.0688140764690513
Paraquat	YDR450W	RPS18A	16	0.564791156041875	0.471417350509303	0.117854337627326
Paraquat	YDR451C	YHP1	6	0.6685442303845	0.0646571256663427	0.0263961610195916
Paraquat	YDR452W	PPN1	6	-0.0260449810451	0.0494335504364725	0.020181162457249
Paraquat	YDR453C	TSA2	6	0.0120084601656667	0.0585164547682941	0.023889242623162
Paraquat	YDR455C		6	-0.0612076998561267	0.0436426873480684	0.0178170525010978
Paraquat	YDR456W	NHX1	16	0.142291417497465	0.142454515668632	0.0356136289171579
Paraquat	YDR457W	TOM1	16	0.548320179324125	0.156295999153683	0.0390739997884208
Paraquat	YDR458C	HEH2	6	0.1116887677359	0.0451940284097956	0.0184503848374743
Paraquat	YDR459C	PFA5	6	0.3948848283315	0.077173448576923	0.0315059284507296
Paraquat	YDR461W	MFA1	6	0.249724294937667	0.107138737281254	0.043739206337529
Paraquat	YDR462W	MRPL28	20	0.345512280101185	0.318891148626228	0.0713062285751235
Paraquat	YDR463W	STP1	6	0.0331988396183167	0.0329669280025929	0.0134586919989038
Paraquat	YDR465C	RMT2	6	0.242201824642	0.0363722490013366	0.0148489084751216
Paraquat	YDR466W	PKH3	6	-0.014089516382985	0.0267022973251115	0.0109011672344346
Paraquat	YDR467C		6	-0.0467357733016533	0.0444001617770177	0.0181262901417864
Paraquat	YDR469W	SDC1	6	0.3063709297905	0.0391153312132588	0.0159687670987407
Paraquat	YDR470C	UGO1	20	0.7312891387605	0.5933119656451	0.132668588704646
Paraquat	YDR471W	RPL27B	6	0.0843634075157	0.0247489442711513	0.0101037141894829
Paraquat	YDR474C		6	0.226721506217833	0.039815463075943	0.0162545947347808
Paraquat	YDR475C	JIP4	6	0.0842960418770333	0.0254483789345546	0.0103892571951085
Paraquat	YDR476C		6	-0.0473418980158333	0.0439493202838839	0.0179422348729444
Paraquat	YDR477W	SNF1	6	0.407770922964	0.138394090853701	0.0564991510013242
Paraquat	YDR479C	PEX29	6	0.123430121661633	0.0285096933707845	0.0116390335802717
Paraquat	YDR480W	DIG2	6	0.0814867642287167	0.0476059474527011	0.0194350466634777
Paraquat	YDR481C	PHO8	6	-0.0249836072930167	0.0394141358692	0.0160907535887113
Paraquat	YDR482C	CWC21	6	0.0277240306032033	0.0232178247102899	0.0094786372462655
Paraquat	YDR483W	KRE2	12	0.75511677159975	0.185817727766644	0.0536409575731381
Paraquat	YDR484W	VPS52	20	0.159436332160305	0.216849730393573	0.0484890738062532
Paraquat	YDR485C	VPS72	6	0.212323764838	0.0285499519361126	0.0116554690707434
Paraquat	YDR486C	VPS60	6	1.23705637291983	0.279875071208509	0.114258519364326
Paraquat	YDR488C	PAC11	6	0.0453119027035683	0.026810441346474	0.0109453168462797
Paraquat	YDR490C	PKH1	6	0.404008798859833	0.0477393895670706	0.019489524178545
Paraquat	YDR491C		6	-0.042642417016625	0.0331340939246082	0.0135269372007903
Paraquat	YDR492W	IZH1	6	-0.0699058880493667	0.014698466149415	0.00600062367793965
Paraquat	YDR493W	MZM1	6	-0.1425219729603	0.0555285194172874	0.022669423124097
Paraquat	YDR494W	RSM28	6	0.603684253515833	0.049734321376037	0.0203039516791475
Paraquat	YDR495C	VPS3	20	0.580981270766	0.198940772916262	0.0444845091737112
Paraquat	YDR496C	PUF6	6	0.2512147291205	0.0555350848643294	0.022672103456628
Paraquat	YDR497C	ITR1	6	0.0991446593232167	0.0325534997093057	0.0132899106049399
Paraquat	YDR500C	RPL37B	6	0.049038704665825	0.0299280956640735	0.0122180938916969
Paraquat	YDR501W	PLM2	6	0.02683279777872	0.0647213969042118	0.0264223996425776
Paraquat	YDR502C	SAM2	6	0.658393120825333	0.118810817388008	0.0485043130872685
Paraquat	YDR503C	LPP1	6	0.0419831945980583	0.070146916043429	0.028637358556042
Paraquat	YDR504C	SPG3	6	0.00439156214978333	0.0466211601007153	0.0190330089105591
Paraquat	YDR505C	PSP1	6	-0.0438974562146483	0.0385589389281752	0.015741620899528
Paraquat	YDR506C	GMC1	6	0.769649802372333	0.0334891160260246	0.0136718743667705
Paraquat	YDR508C	GNP1	6	0.1072192629395	0.065193363369204	0.026615079145067
Paraquat	YDR509W		6	0.150265636186167	0.0307389743525809	0.0125491337300537
Paraquat	YDR511W	SDH7	6	-0.0406709640417833	0.0871613127380511	0.0355834569198955
Paraquat	YDR512C	EMI1	6	0.15069875754735	0.0393852672678432	0.0160789680315593
Paraquat	YDR513W	GRX2	6	-0.000578102277366667	0.0452280287071695	0.0184642654007525
Paraquat	YDR514C		6	0.1290490799275	0.0165162921346445	0.00674274802877036
Paraquat	YDR515W	SLF1	6	0.11446417904505	0.0628667887311573	0.0256652590264478
Paraquat	YDR516C	EMI2	6	-0.08513918777535	0.0511467138841355	0.0208805585060426
Paraquat	YDR517W	GRH1	6	0.0931674874065333	0.0380534142601911	0.0155352413180362
Paraquat	YDR519W	FPR2	6	-0.00251105157631833	0.021450747719858	0.00875723108580365
Paraquat	YDR520C	URC2	6	0.0936891936217	0.0258792087125519	0.0105651427154568
Paraquat	YDR522C	SPS2	6	0.6699317	0.06939522	0.02833048
Paraquat	YDR524C	AGE1	6	0.04423995	0.03172957	0.01295354
Paraquat	YDR525W	API2	6	0.05540041	0.03590232	0.01465706
Paraquat	YDR525W-A	SNA2	6	0.7148244	0.05325688	0.02174203
Paraquat	YDR528W	HLR1	6	0.08603941	0.02845729	0.01161764
Paraquat	YDR529C	QCR7	12	0.003050594	0.08732549	0.0252087
Paraquat	YDR530C	APA2	6	0.6895575	0.1012435	0.04133249
Paraquat	YDR532C	KRE28	6	0.569057	0.08211051	0.03352148
Paraquat	YDR533C	HSP31	6	1.341355	0.269341	0.109958
Paraquat	YDR534C	FIT1	6	0.04106805	0.03834139	0.01565281
Paraquat	YDR535C		6	-0.05010075	0.02879836	0.01175688
Paraquat	YDR536W	STL1	6	0.01788802	0.01822876	0.00744186
Paraquat	YDR537C		6	0.7290326	0.06741442	0.02752182
Paraquat	YDR538W	PAD1	6	0.05974287	0.01817542	0.007420083
Paraquat	YDR539W	FDC1	6	0.04869039	0.02008933	0.008201433
Paraquat	YDR540C	IRC4	6	0.06971034	0.03039538	0.01240886
Paraquat	YDR541C		6	0.09018242	0.04131559	0.01686702
Paraquat	YEL001C	IRC22	6	0.04437281	0.02180912	0.008903536
Paraquat	YEL003W	GIM4	6	0.1195929	0.0644074	0.02629421
Paraquat	YEL004W	YEA4	6	0.6358113	0.05697741	0.02326093
Paraquat	YEL005C	VAB2	6	0.05126759	0.03086529	0.0126007
Paraquat	YEL006W	YEA6	6	0.0510663	0.02809996	0.01147176
Paraquat	YEL007W	MIT1	6	-0.3065719	0.2051213	0.08374044
Paraquat	YEL008W		6	0.5323857	0.06722772	0.0274456
Paraquat	YEL009C	GCN4	16	0.2896735	0.2190843	0.05477108
Paraquat	YEL010W		6	0.003829524	0.03837403	0.01566613
Paraquat	YEL011W	GLC3	6	0.1428638	0.04685816	0.01912976
Paraquat	YEL012W	UBC8	6	0.139459	0.03050587	0.01245397
Paraquat	YEL013W	VAC8	6	0.8723727	0.05913185	0.02414048
Paraquat	YEL014C		6	0.4237473	0.059761	0.02439732
Paraquat	YEL015W	EDC3	6	0.1862143	0.05518061	0.02252739
Paraquat	YEL016C	NPP2	6	0.05203842	0.03306856	0.01350018
Paraquat	YEL017C-A	PMP2	6	0.04213373	0.03975845	0.01623132
Paraquat	YEL017W	GTT3	6	0.09109739	0.0630905	0.02575659
Paraquat	YEL020C	PXP1	6	0.03964481	0.02197524	0.008971355
Paraquat	YEL023C		6	0.2877317	0.05423275	0.02214043
Paraquat	YEL025C		6	0.09850235	0.06336924	0.02587039
Paraquat	YEL027W	VMA3	10	0.7645771	0.5094646	0.1611068
Paraquat	YEL028W		6	-0.07335642	0.03715439	0.01516822
Paraquat	YEL029C	BUD16	11	1.032913	0.4307304	0.1298701
Paraquat	YEL030W	ECM10	6	0.3832086	0.0383694	0.01566424
Paraquat	YEL031W	SPF1	6	0.5525634	0.09551645	0.03899443
Paraquat	YEL033W	MTC7	6	0.138048	0.02943174	0.01201546
Paraquat	YEL036C	ANP1	12	0.02912848	0.0433892	0.01252538
Paraquat	YEL037C	RAD23	6	0.06092524	0.04561145	0.0186208
Paraquat	YEL038W	UTR4	6	0.03630764	0.03191296	0.01302841
Paraquat	YEL039C	CYC7	6	0.1131114	0.04180578	0.01706714
Paraquat	YEL040W	UTR2	6	-0.01862526	0.05113246	0.02087474
Paraquat	YEL041W	YEF1	6	0.1233813	0.02333118	0.009524914
Paraquat	YEL042W	GDA1	6	0.6981422	0.08215287	0.03353877
Paraquat	YEL043W		6	0.1593406	0.01502629	0.006134455
Paraquat	YEL044W	IES6	20	0.2117016	0.2089156	0.04671496
Paraquat	YEL045C		12	1.009668	0.4026891	0.1162463
Paraquat	YEL046C	GLY1	12	1.253192	0.3274987	0.09454073
Paraquat	YEL047C	FRD1	6	0.0007523206	0.06058798	0.02473494
Paraquat	YEL048C	TCA17	6	-0.03329369	0.08826429	0.03603375
Paraquat	YEL049W	PAU2	6	0.5787801	0.03746075	0.01529329
Paraquat	YEL052W	AFG1	6	0.25664	0.03698439	0.01509881
Paraquat	YEL053C	MAK10	6	0.1772136	0.01855131	0.007573541
Paraquat	YEL056W	HAT2	6	0.08423994	0.05513681	0.02250951
Paraquat	YEL057C	SDD1	6	0.02992407	0.07104449	0.02900379
Paraquat	YEL059W	HHY1	6	1.007898	0.1492695	0.06093901
Paraquat	YEL060C	PRB1	6	-0.01341025	0.070854	0.02892603
Paraquat	YEL061C	CIN8	6	0.2974282	0.1624549	0.06632191
Paraquat	YEL062W	NPR2	6	-0.04700755	0.05539437	0.02261466
Paraquat	YEL063C	CAN1	6	0.046805	0.06491463	0.02650129
Paraquat	YEL064C	AVT2	6	0.03964756	0.05113612	0.02087623
Paraquat	YEL065W	SIT1	6	0.07802724	0.01483274	0.006055442
Paraquat	YEL066W	HPA3	6	-0.02483756	0.02685339	0.01096285
Paraquat	YEL067C		6	0.260969	0.02984109	0.01218257
Paraquat	YEL068C		6	0.3966327	0.05278679	0.02155012
Paraquat	YEL071W	DLD3	6	0.06602591	0.03542859	0.01446366
Paraquat	YER001W	MNN1	6	-0.1330127	0.1128501	0.04607088
Paraquat	YER002W	NOP16	5	0.01656501	0.2875382	0.128591
Paraquat	YER004W	FMP52	6	0.002098556	0.02397762	0.009788822
Paraquat	YER005W	YND1	6	0.02254959	0.03008893	0.01228376
Paraquat	YER007C-A	TMA20	6	-0.04000627	0.04078036	0.01664851
Paraquat	YER007W	PAC2	6	0.03794473	0.06021418	0.02458234
Paraquat	YER010C		6	0.04775122	0.01955125	0.007981766
Paraquat	YER011W	TIR1	6	0.6008729	0.105323	0.04299795
Paraquat	YER016W	BIM1	6	0.2380117	0.02179881	0.008899328
Paraquat	YER017C	AFG3	12	0.2740214	0.2676714	0.07727007
Paraquat	YER019C-A	SBH2	6	0.2002211	0.05274455	0.02153287
Paraquat	YER019W	ISC1	6	1.783094	0.2179741	0.08898756
Paraquat	YER020W	GPA2	6	0.5076808	0.02098812	0.008568363
Paraquat	YER024W	YAT2	6	-0.01468576	0.04329742	0.0176761
Paraquat	YER027C	GAL83	6	0.2840363	0.05241419	0.021398
Paraquat	YER028C	MIG3	6	0.9257183	0.1118642	0.04566836
Paraquat	YER030W	CHZ1	6	0.2441217	0.02526546	0.01031458
Paraquat	YER031C	YPT31	6	0.07805281	0.03874525	0.01581768
Paraquat	YER032W	FIR1	6	0.1234316	0.05653622	0.02308082
Paraquat	YER033C	ZRG8	6	0.1619471	0.07398913	0.03020594
Paraquat	YER034W		6	-0.01965594	0.03314982	0.01353336
Paraquat	YER035W	EDC2	6	0.4752061	0.03590845	0.01465956
Paraquat	YER038W-A		5	0.06370397	0.04666397	0.02086876
Paraquat	YER039C	HVG1	6	0.05725463	0.03585091	0.01463607
Paraquat	YER039C-A		6	0.08994396	0.02869163	0.01171331
Paraquat	YER040W	GLN3	16	0.7811335	0.4921038	0.1230259
Paraquat	YER041W	YEN1	6	0.0796184	0.01552771	0.006339162
Paraquat	YER042W	MXR1	6	0.07093601	0.0460543	0.01880159
Paraquat	YER044C	ERG28	12	0.3400905	0.07223188	0.02085155
Paraquat	YER044C-A	MEI4	6	0.009667351	0.0225421	0.009202772
Paraquat	YER045C	ACA1	6	0.08433588	0.02244186	0.009161849
Paraquat	YER046W	SPO73	6	0.2466566	0.03903047	0.01593412
Paraquat	YER046W-A		6	0.0372821	0.04329895	0.01767672
Paraquat	YER047C	SAP1	6	0.1172207	0.02226295	0.00908881
Paraquat	YER048C	CAJ1	6	0.1543411	0.04878531	0.01991652
Paraquat	YER049W	TPA1	6	0.08608837	0.02791725	0.01139717
Paraquat	YER050C	RSM18	12	0.01845022	0.1667137	0.04812609
Paraquat	YER051W	JHD1	6	0.3994787	0.07140103	0.02914935
Paraquat	YER052C	HOM3	6	0.436922	0.04001807	0.01633731
Paraquat	YER053C	PIC2	6	0.04687247	0.02933152	0.01197454
Paraquat	YER054C	GIP2	6	0.07007295	0.05551281	0.02266301
Paraquat	YER055C	HIS1	6	0.5325801	0.09964448	0.04067969
Paraquat	YER056C	FCY2	6	0.6003052	0.08806773	0.0359535
Paraquat	YER056C-A	RPL34A	6	0.2319742	0.07292964	0.0297734
Paraquat	YER057C	HMF1	6	0.7901742	0.1003803	0.04098008
Paraquat	YER058W	PET117	20	0.250537	0.2591962	0.05795802
Paraquat	YER059W	PCL6	6	0.2038076	0.04641263	0.01894788
Paraquat	YER060W	FCY21	6	0.1654336	0.0624199	0.02548282
Paraquat	YER060W-A	FCY22	6	0.07069153	0.1254629	0.05122002
Paraquat	YER061C	CEM1	6	0.7571014	0.02545285	0.01039108
Paraquat	YER062C	GPP2	6	0.06225058	0.07274091	0.02969635
Paraquat	YER063W	THO1	6	0.1859405	0.1136606	0.04640176
Paraquat	YER064C	VHR2	6	0.04509237	0.06318221	0.02579403
Paraquat	YER065C	ICL1	6	0.03182329	0.03690386	0.01506594
Paraquat	YER066C-A		6	0.6949919	0.1066305	0.04353172
Paraquat	YER066W	RRT13	6	1.262916	0.2319412	0.09468961
Paraquat	YER067C-A		6	0.8626986	0.192614	0.07863434
Paraquat	YER067W	RGI1	6	0.03182312	0.04723729	0.01928454
Paraquat	YER068C-A		20	0.7767366	0.591138	0.1321825
Paraquat	YER068W	MOT2	17	0.5912775	0.9681076	0.2348006
Paraquat	YER069W	ARG5,6	6	0.05071356	0.01945061	0.00794068
Paraquat	YER070W	RNR1	12	0.0507007	0.1405737	0.04058013
Paraquat	YER071C	TDA2	6	-0.03103706	0.050418	0.02058306
Paraquat	YER072W	VTC1	6	0.5507056	0.050638	0.02067288
Paraquat	YER073W	ALD5	6	0.01729802	0.02502556	0.01021664
Paraquat	YER074W	RPS24A	6	0.2874795	0.06047831	0.02469017
Paraquat	YER075C	PTP3	6	0.07317313	0.07847399	0.03203687
Paraquat	YER077C	MRX1	6	0.07709607	0.06549895	0.02673984
Paraquat	YER078C	ICP55	6	0.544423	0.03732774	0.01523899
Paraquat	YER079W		6	0.08685551	0.05908013	0.02411936
Paraquat	YER080W	AIM9	6	0.1411717	0.01808923	0.007384897
Paraquat	YER081W	SER3	6	0.1489637	0.04386274	0.01790689
Paraquat	YER083C	GET2	6	0.6391991	0.04031514	0.01645859
Paraquat	YER084W		6	-0.009336514	0.1224174	0.0499767
Paraquat	YER085C		6	-0.0961487	0.2055124	0.08390008
Paraquat	YER087C-A		6	0.668487	0.04567327	0.01864603
Paraquat	YER088C	DOT6	6	0.0121325	0.02567298	0.01048095
Paraquat	YER089C	PTC2	6	0.03534007	0.1364826	0.05571878
Paraquat	YER090W	TRP2	6	0.7620882	0.1009883	0.04122829
Paraquat	YER091C	MET6	6	0.3829975	0.1454216	0.05936811
Paraquat	YER091C-A		6	0.04365109	0.07530105	0.03074153
Paraquat	YER092W	IES5	6	0.6377218	0.03019748	0.01232807
Paraquat	YER093C-A	AIM11	6	0.08742742	0.03301086	0.01347663
Paraquat	YER095W	RAD51	6	0.663788	0.03243337	0.01324087
Paraquat	YER096W	SHC1	6	0.01237585	0.03939706	0.01608378
Paraquat	YER097W		6	0.04915496	0.04845983	0.01978364
Paraquat	YER098W	UBP9	6	0.3916577	0.07276875	0.02970772
Paraquat	YER101C	AST2	6	0.05142142	0.04176047	0.01704864
Paraquat	YER106W	MAM1	6	0.7692002	0.05720956	0.02335571
Paraquat	YER108C		6	0.3821826	0.1001904	0.04090257
Paraquat	YER109C	FLO8	6	-0.01095636	0.05007196	0.02044179
Paraquat	YER111C	SWI4	6	0.309776	0.1035081	0.042257
Paraquat	YER113C	TMN3	6	0.6922779	0.1331584	0.05436168
Paraquat	YER114C	BOI2	6	0.07721339	0.03433467	0.01401707
Paraquat	YER115C	SPR6	6	0.1085214	0.01507222	0.006153209
Paraquat	YER116C	SLX8	6	0.4410961	0.05426873	0.02215512
Paraquat	YER117W	RPL23B	6	0.4746747	0.06544162	0.02671643
Paraquat	YER118C	SHO1	6	0.4376498	0.2464302	0.1006047
Paraquat	YER119C	AVT6	6	0.6219267	0.03698559	0.0150993
Paraquat	YER119C-A		6	0.1844111	0.05878829	0.02400022
Paraquat	YER120W	SCS2	6	0.5444166	0.06674765	0.02724962
Paraquat	YER121W		6	0.6853518	0.0490649	0.02003066
Paraquat	YER122C	GLO3	16	0.5901604	0.8757177	0.2189294
Paraquat	YER123W	YCK3	6	0.1373923	0.04926063	0.02011057
Paraquat	YER124C	DSE1	6	0.6339613	0.1084176	0.04426132
Paraquat	YER128W	VFA1	6	-0.01260604	0.03365122	0.01373805
Paraquat	YER129W	SAK1	6	0.04552826	0.0244793	0.009993632
Paraquat	YER130C	COM2	6	0.0213279	0.03412704	0.01393231
Paraquat	YER131W	RPS26B	6	0.7222764	0.07774667	0.03173995
Paraquat	YER132C	PMD1	6	0.05216238	0.03553622	0.0145076
Paraquat	YER134C		6	0.6138426	0.03580935	0.01461911
Paraquat	YER135C		6	-0.04225879	0.04890629	0.01996591
Paraquat	YER137C		6	0.01926266	0.02627276	0.01072581
Paraquat	YER139C	RTR1	6	0.07452231	0.04674561	0.01908381
Paraquat	YER140W	EMP65	6	0.2963551	0.04515872	0.01843597
Paraquat	YER141W	COX15	16	0.1935799	0.1956162	0.04890406
Paraquat	YER142C	MAG1	6	0.14686	0.01483414	0.006056011
Paraquat	YER143W	DDI1	6	-0.04054019	0.01638071	0.006687399
Paraquat	YER144C	UBP5	6	-0.00919232	0.01473969	0.006017452
Paraquat	YER145C	FTR1	6	0.3643426	0.08379426	0.03420887
Paraquat	YER149C	PEA2	6	0.1751179	0.02114579	0.008632734
Paraquat	YER150W	SPI1	6	0.5799412	0.09168948	0.03743208
Paraquat	YER151C	UBP3	6	0.06965527	0.01789779	0.007306744
Paraquat	YER152C		6	0.0897838	0.03135921	0.01280234
Paraquat	YER153C	PET122	6	-0.01783042	0.009138848	0.003730919
Paraquat	YER154W	OXA1	14	0.06034567	0.222591	0.05948996
Paraquat	YER155C	BEM2	6	0.1106339	0.07622889	0.03112031
Paraquat	YER156C		6	0.7633338	0.05913472	0.02414165
Paraquat	YER158C		6	0.04777755	0.07997008	0.03264765
Paraquat	YER161C	SPT2	6	0.1942257	0.06611829	0.02699268
Paraquat	YER162C	RAD4	6	0.6024085	0.06688496	0.02730567
Paraquat	YER163C	GCG1	6	0.07119668	0.01531969	0.006254237
Paraquat	YER164W	CHD1	6	0.2528253	0.03335014	0.01361514
Paraquat	YER166W	DNF1	6	0.03372355	0.05234384	0.02136928
Paraquat	YER167W	BCK2	6	0.4914847	0.02234926	0.009124047
Paraquat	YER169W	RPH1	12	-0.03545409	0.1797161	0.05187958
Paraquat	YER170W	ADK2	6	0.6455731	0.05348287	0.02183429
Paraquat	YER173W	RAD24	6	0.1675559	0.02729977	0.01114508
Paraquat	YER174C	GRX4	6	0.0003634376	0.03020892	0.01233274
Paraquat	YER175C	TMT1	6	0.03293953	0.01704419	0.006958263
Paraquat	YER176W	ECM32	6	0.5805284	0.09934886	0.040559
Paraquat	YER177W	BMH1	6	0.2652512	0.05810566	0.02372154
Paraquat	YER178W	PDA1	6	0.7152755	0.08779874	0.03584369
Paraquat	YER179W	DMC1	6	1.05988	0.1602353	0.0654158
Paraquat	YER180C	ISC10	6	0.6503029	0.04916593	0.02007191
Paraquat	YER181C		6	0.6455852	0.03803431	0.01552744
Paraquat	YER182W	FMP10	6	0.1679135	0.0492107	0.02009019
Paraquat	YER183C	FAU1	6	0.731849	0.184682	0.0753961
Paraquat	YER184C	TOG1	6	-0.07584504	0.03142345	0.01282857
Paraquat	YER185W	PUG1	6	0.6428192	0.02766558	0.01129442
Paraquat	YER186C		6	0.1857025	0.06625816	0.02704978
Paraquat	YER187W		6	0.5806298	0.03824104	0.01561184
Paraquat	YER188W		6	0.2378405	0.03868474	0.01579298
Paraquat	YFL001W	DEG1	6	0.4259681	0.0449133	0.01833578
Paraquat	YFL003C	MSH4	6	0.02591859	0.08732164	0.03564891
Paraquat	YFL004W	VTC2	6	0.02256093	0.04268582	0.01742641
Paraquat	YFL006W		6	0.6987236	0.06183033	0.02524212
Paraquat	YFL007W	BLM10	6	-0.00895964	0.0941746	0.03844662
Paraquat	YFL010C	WWM1	6	-0.07633477	0.04823245	0.01969082
Paraquat	YFL010W-A	AUA1	6	0.03779702	0.05175433	0.02112862
Paraquat	YFL011W	HXT10	6	0.7318721	0.05205182	0.02125007
Paraquat	YFL012W		6	0.07469563	0.08147637	0.03326259
Paraquat	YFL013C	IES1	6	0.02048923	0.0817348	0.03336809
Paraquat	YFL013W-A		6	0.5998569	0.05917451	0.02415789
Paraquat	YFL014W	HSP12	6	0.5640737	0.06381948	0.02605419
Paraquat	YFL015C		6	0.04791894	0.02215001	0.009042703
Paraquat	YFL018C	LPD1	6	-0.03436275	0.1028586	0.04199186
Paraquat	YFL019C		6	0.1317741	0.04000252	0.01633096
Paraquat	YFL020C	PAU5	6	0.732214	0.0776898	0.03171673
Paraquat	YFL021W	GAT1	6	0.1907378	0.02983929	0.01218184
Paraquat	YFL023W	BUD27	6	0.3224307	0.01877007	0.007662848
Paraquat	YFL025C	BST1	6	0.6938567	0.04248495	0.01734441
Paraquat	YFL026W	STE2	6	0.02781885	0.03378774	0.01379379
Paraquat	YFL027C	GYP8	6	0.2207518	0.03828003	0.01562776
Paraquat	YFL028C	CAF16	6	0.3816172	0.06033897	0.02463328
Paraquat	YFL030W	AGX1	6	0.7689837	0.1326671	0.05416113
Paraquat	YFL031W	HAC1	6	-0.01324618	0.0535182	0.02184871
Paraquat	YFL032W		6	0.692611	0.1153526	0.0470925
Paraquat	YFL033C	RIM15	6	0.30967	0.1532457	0.06256229
Paraquat	YFL034C-A	RPL22B	6	0.3057705	0.05195472	0.02121043
Paraquat	YFL034W	MIL1	6	0.584338	0.05672258	0.02315689
Paraquat	YFL035C-B	NA	6	-0.01066079	0.1077996	0.04400902
Paraquat	YFL036W	RPO41	6	0.3287886	0.03768499	0.01538483
Paraquat	YFL040W		6	0.1453373	0.01821511	0.007436287
Paraquat	YFL041W	FET5	6	0.08462448	0.05549572	0.02265603
Paraquat	YFL042C	LAM5	6	0.7015373	0.07625052	0.03112915
Paraquat	YFL043C		6	0.6200994	0.05254127	0.02144988
Paraquat	YFL044C	OTU1	6	0.7127329	0.02735327	0.01116693
Paraquat	YFL046W	FMP32	6	-0.0730853	0.04309218	0.01759231
Paraquat	YFL047W	RGD2	6	0.3779873	0.04023586	0.01642622
Paraquat	YFL048C	EMP47	6	0.02896823	0.01859093	0.007589714
Paraquat	YFL049W	SWP82	6	0.7913675	0.05512505	0.02250471
Paraquat	YFL050C	ALR2	6	-0.07795012	0.1010597	0.04125743
Paraquat	YFL051C		6	0.6279448	0.04602469	0.0187895
Paraquat	YFL052W	ZNF1	6	0.6392617	0.1150052	0.04695069
Paraquat	YFL053W	DAK2	6	0.1672865	0.01312676	0.005358979
Paraquat	YFL054C	AQY3	6	0.6745131	0.03824042	0.01561159
Paraquat	YFL055W	AGP3	6	-0.01732508	0.01983387	0.008097142
Paraquat	YFL056C	AAD6	6	0.06022017	0.02687221	0.01097053
Paraquat	YFL063W		6	0.03755311	0.04138891	0.01689695
Paraquat	YFR001W	LOC1	19	0.8802029	0.8306278	0.1905591
Paraquat	YFR006W		6	0.673157	0.03993773	0.01630451
Paraquat	YFR007W	YFH7	6	0.6185074	0.03444842	0.01406351
Paraquat	YFR008W	FAR7	6	0.6963266	0.06413574	0.0261833
Paraquat	YFR009W	GCN20	6	0.7818502	0.09018681	0.03681861
Paraquat	YFR010W	UBP6	6	0.2055782	0.02659655	0.010858
Paraquat	YFR011C	MIC19	6	0.7195798	0.0669177	0.02731904
Paraquat	YFR012W	DCV1	6	0.6919472	0.1187292	0.04847097
Paraquat	YFR013W	IOC3	6	0.7697443	0.08427223	0.034404
Paraquat	YFR014C	CMK1	6	0.141711	0.05844513	0.02386013
Paraquat	YFR015C	GSY1	6	0.4037124	0.1151709	0.04701833
Paraquat	YFR016C		6	0.5561627	0.1148292	0.04687884
Paraquat	YFR017C	IGD1	6	0.6279871	0.1073652	0.04383165
Paraquat	YFR018C		6	0.1143586	0.05305089	0.02165794
Paraquat	YFR019W	FAB1	6	0.2386764	0.0727353	0.02969406
Paraquat	YFR020W	CSS2	6	0.6899278	0.09509341	0.03882172
Paraquat	YFR021W	ATG18	6	0.1287739	0.03648961	0.01489682
Paraquat	YFR022W	ROG3	6	0.1466461	0.02702702	0.01103374
Paraquat	YFR023W	PES4	6	0.04993381	0.08110429	0.03311069
Paraquat	YFR024C		6	0.1852881	0.07012032	0.0286265
Paraquat	YFR024C-A	LSB3	6	0.7003678	0.1206259	0.04924534
Paraquat	YFR025C	HIS2	6	0.5553301	0.1068863	0.04363614
Paraquat	YFR026C	ULI1	6	0.03874986	0.05594841	0.02284084
Paraquat	YFR030W	MET10	6	0.6175478	0.2294425	0.09366951
Paraquat	YFR031C-A	RPL2A	6	0.05004072	0.06175293	0.02521053
Paraquat	YFR032C	RRT5	6	0.1175618	0.02195846	0.008964504
Paraquat	YFR032C-A	RPL29	6	0.7047508	0.1245061	0.0508294
Paraquat	YFR033C	QCR6	6	0.07379957	0.04391125	0.01792669
Paraquat	YFR034C	PHO4	6	0.08918253	0.04018003	0.01640343
Paraquat	YFR035C		6	0.155118	0.05801183	0.02368323
Paraquat	YFR038W	IRC5	6	-0.03195669	0.04019548	0.01640973
Paraquat	YFR039C	OSW7	6	0.670658	0.1196154	0.04883278
Paraquat	YFR040W	SAP155	6	1.218314	0.1120527	0.04574532
Paraquat	YFR041C	ERJ5	6	0.0005893951	0.04912674	0.02005591
Paraquat	YFR043C	IRC6	6	0.07592681	0.02958545	0.01207821
Paraquat	YFR044C	DUG1	6	-0.0574879	0.07026119	0.02868401
Paraquat	YFR045W		6	-0.03211896	0.03969612	0.01620587
Paraquat	YFR046C	CNN1	6	-0.02856666	0.03659634	0.01494039
Paraquat	YFR047C	BNA6	6	-0.03082486	0.04584287	0.01871527
Paraquat	YFR048W	RMD8	6	-0.1102108	0.0498833	0.02036477
Paraquat	YFR049W	YMR31	6	0.2367045	0.03893743	0.01589614
Paraquat	YFR053C	HXK1	6	0.01381709	0.02741937	0.01119391
Paraquat	YFR054C		6	0.260666	0.0513067	0.02094587
Paraquat	YFR055W	IRC7	6	0.3351235	0.04737881	0.01934232
Paraquat	YFR056C		6	0.09152201	0.04712923	0.01924043
Paraquat	YFR057W		6	0.1240003	0.07979444	0.03257595
Paraquat	YGL002W	ERP6	6	0.884571	0.03045074	0.01243146
Paraquat	YGL003C	CDH1	20	0.2732395	0.1900875	0.04250485
Paraquat	YGL004C	RPN14	6	0.6895873	0.08594904	0.03508855
Paraquat	YGL005C	COG7	6	0.2319621	0.03993358	0.01630282
Paraquat	YGL006W	PMC1	6	0.0128048	0.0313546	0.01280046
Paraquat	YGL007W	BRP1	6	0.242791	0.03128134	0.01277055
Paraquat	YGL009C	LEU1	6	0.4387954	0.04050926	0.01653783
Paraquat	YGL010W	MPO1	6	0.02185408	0.02864986	0.01169626
Paraquat	YGL013C	PDR1	6	-0.03555939	0.03067976	0.01252496
Paraquat	YGL014W	PUF4	6	0.1977316	0.05539751	0.02261594
Paraquat	YGL015C		6	0.7828916	0.1079881	0.04408596
Paraquat	YGL016W	KAP122	6	0.854505	0.1032613	0.04215626
Paraquat	YGL017W	ATE1	6	0.06238321	0.02971721	0.012132
Paraquat	YGL019W	CKB1	6	0.4811488	0.04778912	0.01950983
Paraquat	YGL020C	GET1	6	-0.009587201	0.0509024	0.02078082
Paraquat	YGL021W	ALK1	6	0.01797287	0.02577176	0.01052128
Paraquat	YGL023C	PIB2	6	0.5223188	0.06042624	0.02466891
Paraquat	YGL024W		6	0.4736061	0.06254358	0.02553331
Paraquat	YGL025C	PGD1	20	0.1533046	0.2518029	0.05630484
Paraquat	YGL026C	TRP5	6	-0.2235841	0.06592888	0.02691535
Paraquat	YGL027C	CWH41	6	0.03292758	0.03838768	0.01567171
Paraquat	YGL028C	SCW11	6	-0.1561008	0.06052155	0.02470782
Paraquat	YGL029W	CGR1	6	-0.03541977	0.01782178	0.007275711
Paraquat	YGL031C	RPL24A	6	0.1502625	0.03151107	0.01286434
Paraquat	YGL032C	AGA2	6	0.6653458	0.07748525	0.03163322
Paraquat	YGL033W	HOP2	20	-0.01423667	0.1839691	0.04113675
Paraquat	YGL034C		6	-0.00759117	0.02050019	0.008369167
Paraquat	YGL035C	MIG1	6	0.6884184	0.06412228	0.02617781
Paraquat	YGL036W		6	0.1100109	0.03182132	0.012991
Paraquat	YGL037C	PNC1	6	0.1068851	0.03281549	0.01339687
Paraquat	YGL039W		6	0.6204108	0.08329445	0.03400482
Paraquat	YGL041C		6	0.1475318	0.02411681	0.009845648
Paraquat	YGL042C		6	0.04790234	0.05865178	0.02394449
Paraquat	YGL043W	DST1	6	0.1269185	0.03914285	0.01598
Paraquat	YGL045W	RIM8	6	0.31408	0.0505128	0.02062176
Paraquat	YGL046W		6	0.2521413	0.05090744	0.02078287
Paraquat	YGL049C	TIF4632	6	0.1451975	0.1028757	0.04199884
Paraquat	YGL050W	TYW3	6	-0.001373856	0.02037048	0.008316214
Paraquat	YGL051W	MST27	6	0.6135281	0.07399505	0.03020835
Paraquat	YGL053W	PRM8	6	0.01818263	0.0161174	0.0065799
Paraquat	YGL054C	ERV14	6	0.3142473	0.0326336	0.01332261
Paraquat	YGL056C	SDS23	6	-0.03445572	0.01775141	0.007246984
Paraquat	YGL057C	GEP7	6	0.01807462	0.0307856	0.01256817
Paraquat	YGL058W	RAD6	6	0.2737458	0.0329147	0.01343737
Paraquat	YGL059W	PKP2	6	0.5756438	0.06219173	0.02538967
Paraquat	YGL060W	YBP2	6	0.7630955	0.1681191	0.06863436
Paraquat	YGL062W	PYC1	6	0.1175067	0.04879633	0.01992102
Paraquat	YGL063W	PUS2	6	0.6274694	0.199898	0.081608
Paraquat	YGL066W	SGF73	6	1.079226	0.2154493	0.08795679
Paraquat	YGL067W	NPY1	6	0.03712638	0.06874076	0.0280633
Paraquat	YGL071W	AFT1	6	0.6375103	0.1044044	0.04262292
Paraquat	YGL077C	HNM1	6	0.05157821	0.07620945	0.03111238
Paraquat	YGL078C	DBP3	6	0.2334991	0.03275391	0.01337173
Paraquat	YGL079W	KXD1	6	0.1520644	0.03876618	0.01582623
Paraquat	YGL080W	MPC1	6	0.6964877	0.1513566	0.06179107
Paraquat	YGL081W		6	0.2281908	0.03372457	0.013768
Paraquat	YGL082W		6	0.1247377	0.01735359	0.007084575
Paraquat	YGL083W	SCY1	6	0.04138631	0.0361167	0.01474458
Paraquat	YGL084C	GUP1	6	0.1539687	0.01775169	0.007247097
Paraquat	YGL085W	LCL3	6	0.7277373	0.1018841	0.04159401
Paraquat	YGL086W	MAD1	6	0.1230901	0.07165773	0.02925415
Paraquat	YGL087C	MMS2	6	1.415579	0.1176129	0.04801525
Paraquat	YGL089C	MF(ALPHA)2	6	0.6044904	0.1154009	0.04711221
Paraquat	YGL090W	LIF1	6	0.04689868	0.01843128	0.007524538
Paraquat	YGL094C	PAN2	6	0.06102906	0.04841248	0.01976431
Paraquat	YGL096W	TOS8	6	0.1362151	0.04842961	0.0197713
Paraquat	YGL101W		6	0.5413808	0.1560442	0.06370477
Paraquat	YGL104C	VPS73	6	0.1640668	0.04154647	0.01696128
Paraquat	YGL105W	ARC1	6	0.3832195	0.01733224	0.007075856
Paraquat	YGL108C		6	0.6702912	0.129798	0.05298982
Paraquat	YGL109W		6	0.08621892	0.04725175	0.01929045
Paraquat	YGL110C	CUE3	6	0.1470493	0.06905314	0.02819083
Paraquat	YGL114W		6	0.7175042	0.05773086	0.02356853
Paraquat	YGL115W	SNF4	6	0.4036734	0.03539273	0.01444902
Paraquat	YGL117W		6	0.1329274	0.03772842	0.01540256
Paraquat	YGL118C		4	0.8010499	0.04505641	0.0225282
Paraquat	YGL121C	GPG1	6	0.8529323	0.052288	0.02134649
Paraquat	YGL124C	MON1	6	1.083073	0.147528	0.06022804
Paraquat	YGL125W	MET13	6	0.4365866	0.1241325	0.05067689
Paraquat	YGL126W	SCS3	6	0.824117	0.09343972	0.03814661
Paraquat	YGL127C	SOH1	6	-0.03099004	0.0250488	0.01022613
Paraquat	YGL131C	SNT2	6	0.02049902	0.06076936	0.02480899
Paraquat	YGL132W		6	0.7999579	0.06600885	0.026948
Paraquat	YGL133W	ITC1	6	0.6918061	0.05449919	0.0222492
Paraquat	YGL135W	RPL1B	16	0.1886165	0.09987851	0.02496963
Paraquat	YGL136C	MRM2	6	-0.1262353	0.01803349	0.007362141
Paraquat	YGL138C		6	0.04012442	0.04308441	0.01758914
Paraquat	YGL139W	FLC3	6	0.04516147	0.0397416	0.01622444
Paraquat	YGL140C		5	1.065543	0.06628128	0.02964189
Paraquat	YGL141W	HUL5	6	0.04585056	0.02005825	0.008188746
Paraquat	YGL143C	MRF1	12	0.0066272	0.1200049	0.03464244
Paraquat	YGL144C	ROG1	6	0.05800699	0.03058856	0.01248773
Paraquat	YGL146C	RRT6	6	0.04509562	0.04829406	0.01971597
Paraquat	YGL147C	RPL9A	6	0.1564237	0.03842363	0.01568638
Paraquat	YGL148W	ARO2	6	0.07206118	0.08081732	0.03299353
Paraquat	YGL149W		6	0.09578907	0.06496138	0.02652037
Paraquat	YGL151W	NUT1	6	0.5506093	0.0334919	0.01367301
Paraquat	YGL152C		6	0.08183404	0.02020707	0.008249503
Paraquat	YGL153W	PEX14	6	0.03844183	0.02601454	0.01062039
Paraquat	YGL154C	LYS5	6	-0.1421377	0.02993564	0.01222118
Paraquat	YGL156W	AMS1	6	-0.008815994	0.03816691	0.01558158
Paraquat	YGL157W	ARI1	6	0.185185	0.02112522	0.008624335
Paraquat	YGL158W	RCK1	6	0.677002	0.102149	0.04170215
Paraquat	YGL159W		6	0.3070825	0.04076601	0.01664265
Paraquat	YGL160W	AIM14	6	0.06595436	0.0287709	0.01174567
Paraquat	YGL161C	YIP5	6	0.0411622	0.02407852	0.009830013
Paraquat	YGL162W	SUT1	6	0.6709973	0.08511247	0.03474702
Paraquat	YGL163C	RAD54	6	0.381	0.05298676	0.02163175
Paraquat	YGL164C	YRB30	6	0.07556608	0.03977624	0.01623858
Paraquat	YGL165C		6	-0.005521314	0.03193166	0.01303604
Paraquat	YGL166W	CUP2	6	-0.06678771	0.02489815	0.01016463
Paraquat	YGL167C	PMR1	6	0.2573171	0.1014179	0.04140368
Paraquat	YGL168W	HUR1	6	0.4277399	0.02319772	0.009470429
Paraquat	YGL170C	SPO74	6	-0.02945857	0.04889969	0.01996322
Paraquat	YGL173C	XRN1	6	0.153607	0.1246754	0.0508985
Paraquat	YGL174W	BUD13	6	0.1934025	0.08389823	0.03425131
Paraquat	YGL175C	SAE2	6	0.1355723	0.02199408	0.008979046
Paraquat	YGL176C		6	-0.03025081	0.05447349	0.02223871
Paraquat	YGL177W		6	0.06055383	0.05650117	0.02306651
Paraquat	YGL179C	TOS3	6	0.01483826	0.02891482	0.01180443
Paraquat	YGL180W	ATG1	6	0.133166	0.0229003	0.009349008
Paraquat	YGL181W	GTS1	6	0.1523679	0.03562438	0.01454359
Paraquat	YGL194C	HOS2	6	-0.06612481	0.01514435	0.006182654
Paraquat	YGL195W	GCN1	6	0.01276959	0.02188259	0.008933529
Paraquat	YGL196W	DSD1	6	0.02851986	0.04465593	0.01823071
Paraquat	YGL197W	MDS3	6	0.03738916	0.0340632	0.01390624
Paraquat	YGL198W	YIP4	6	-0.04243703	0.03804197	0.01553057
Paraquat	YGL199C		6	0.6046498	0.02603444	0.01062852
Paraquat	YGL200C	EMP24	8	0.05979147	0.1171442	0.04141672
Paraquat	YGL202W	ARO8	6	0.1334894	0.07861876	0.03209598
Paraquat	YGL203C	KEX1	6	0.06630932	0.05956143	0.02431585
Paraquat	YGL205W	POX1	6	0.7347118	0.1242558	0.05072721
Paraquat	YGL206C	CHC1	16	0.6092136	0.3951686	0.09879216
Paraquat	YGL208W	SIP2	6	0.6650544	0.08242686	0.03365062
Paraquat	YGL209W	MIG2	6	0.6416361	0.1359257	0.05549144
Paraquat	YGL210W	YPT32	6	0.5654495	0.09595004	0.03917144
Paraquat	YGL211W	NCS6	6	0.5183335	0.09125895	0.03725631
Paraquat	YGL212W	VAM7	6	1.692331	0.2002037	0.0817328
Paraquat	YGL213C	SKI8	6	0.5280267	0.07197547	0.02938386
Paraquat	YGL214W		6	0.1223943	0.05431581	0.02217434
Paraquat	YGL215W	CLG1	6	0.08688777	0.02559162	0.01044774
Paraquat	YGL216W	KIP3	6	0.7117264	0.1653019	0.06748422
Paraquat	YGL217C		6	0.2447755	0.08920878	0.03641933
Paraquat	YGL218W		6	0.9952819	0.05355264	0.02186277
Paraquat	YGL219C	MDM34	6	0.4575975	0.03757509	0.01533996
Paraquat	YGL220W	FRA2	20	0.1846734	0.1369926	0.03063247
Paraquat	YGL221C	NIF3	6	0.5848313	0.183313	0.07483722
Paraquat	YGL222C	EDC1	6	0.08702022	0.05640467	0.02302711
Paraquat	YGL223C	COG1	12	0.08329247	0.1206087	0.03481673
Paraquat	YGL224C	SDT1	6	0.1267855	0.01983706	0.008098447
Paraquat	YGL226C-A	OST5	6	0.003344481	0.02169462	0.008856793
Paraquat	YGL226W	MTC3	6	0.6930115	0.06603486	0.02695862
Paraquat	YGL227W	VID30	6	0.2387597	0.04106489	0.01676467
Paraquat	YGL228W	SHE10	6	0.222081	0.04875506	0.01990417
Paraquat	YGL229C	SAP4	6	0.1424554	0.09196517	0.03754463
Paraquat	YGL230C		6	0.7103112	0.1244013	0.05078664
Paraquat	YGL231C	EMC4	6	0.08516849	0.03240846	0.0132307
Paraquat	YGL232W	TAN1	6	0.05943337	0.04521779	0.01846009
Paraquat	YGL234W	ADE5,7	6	0.4788531	0.1413426	0.05770289
Paraquat	YGL235W		6	0.4911059	0.05426787	0.02215477
Paraquat	YGL236C	MTO1	6	0.00782174	0.023169	0.009458703
Paraquat	YGL237C	HAP2	6	0.1841875	0.04539824	0.01853376
Paraquat	YGL240W	DOC1	16	0.06526162	0.07972311	0.01993078
Paraquat	YGL241W	KAP114	6	0.09333679	0.02090857	0.008535888
Paraquat	YGL242C		6	0.01093458	0.04091148	0.01670204
Paraquat	YGL243W	TAD1	6	0.09679257	0.03764494	0.01536848
Paraquat	YGL244W	RTF1	6	0.2568921	0.0577581	0.02357965
Paraquat	YGL246C	RAI1	19	0.4951904	0.4910618	0.1126573
Paraquat	YGL248W	PDE1	6	-0.09960917	0.04796498	0.01958162
Paraquat	YGL249W	ZIP2	6	0.383964	0.07493318	0.03059134
Paraquat	YGL250W	RMR1	5	0.03055239	0.02931861	0.01311168
Paraquat	YGL251C	HFM1	6	-0.07561205	0.02138156	0.008728985
Paraquat	YGL252C	RTG2	6	0.1856351	0.05288175	0.02158888
Paraquat	YGL253W	HXK2	6	0.1568458	0.03864927	0.0157785
Paraquat	YGL254W	FZF1	6	1.243739	0.1445963	0.05903121
Paraquat	YGL255W	ZRT1	6	0.5488394	0.1005515	0.04104999
Paraquat	YGL256W	ADH4	6	0.1654492	0.05867196	0.02395273
Paraquat	YGL257C	MNT2	6	0.1529718	0.03555076	0.01451354
Paraquat	YGL258W	VEL1	6	0.2268881	0.02614423	0.01067334
Paraquat	YGL259W	YPS5	6	0.1950181	0.03886913	0.01586826
Paraquat	YGL260W		5	-0.004164205	0.02861449	0.01279679
Paraquat	YGL261C	PAU11	6	0.9511434	0.1165077	0.04756408
Paraquat	YGL262W		6	0.9173835	0.05462849	0.02230199
Paraquat	YGL263W	COS12	6	0.4338546	0.03178592	0.01297655
Paraquat	YGR001C	EFM5	6	0.009170745	0.0353193	0.01441904
Paraquat	YGR003W	CUL3	6	-0.09810039	0.02684765	0.01096051
Paraquat	YGR004W	PEX31	6	0.003101026	0.03262767	0.01332019
Paraquat	YGR007W	ECT1	6	0.6753306	0.1218683	0.04975251
Paraquat	YGR008C	STF2	6	0.52298	0.05020973	0.02049803
Paraquat	YGR010W	NMA2	6	0.7059593	0.06870215	0.02804753
Paraquat	YGR011W		6	0.6778958	0.0479289	0.01956689
Paraquat	YGR012W	MCY1	6	0.0494377	0.01350162	0.005512013
Paraquat	YGR014W	MSB2	6	-0.01678439	0.05110764	0.02086461
Paraquat	YGR015C		6	-0.0325589	0.03532417	0.01442103
Paraquat	YGR016W		6	0.6852881	0.1050477	0.04288556
Paraquat	YGR017W		6	0.5616282	0.09963658	0.04067647
Paraquat	YGR018C		6	0.0004843224	0.0344078	0.01404692
Paraquat	YGR019W	UGA1	6	1.990693	0.2305813	0.09413441
Paraquat	YGR021W		6	0.07762399	0.01657992	0.006768725
Paraquat	YGR022C		6	0.6914511	0.07188166	0.02934557
Paraquat	YGR023W	MTL1	6	0.6587247	0.05889405	0.0240434
Paraquat	YGR025W		6	0.5230107	0.06584993	0.02688312
Paraquat	YGR026W		6	0.1414426	0.03299112	0.01346857
Paraquat	YGR027C	RPS25A	6	0.6832238	0.1135954	0.04637512
Paraquat	YGR028W	MSP1	6	0.6061036	0.05954688	0.02430991
Paraquat	YGR031W	IMO32	6	-0.01001344	0.02172138	0.008867716
Paraquat	YGR032W	GSC2	6	0.6551755	0.07633802	0.03116486
Paraquat	YGR033C	TIM21	6	0.1317408	0.009248955	0.00377587
Paraquat	YGR034W	RPL26B	6	0.7032203	0.07569272	0.03090142
Paraquat	YGR035C		6	1.296257	0.1659814	0.06776164
Paraquat	YGR037C	ACB1	6	0.03092839	0.05349345	0.02183861
Paraquat	YGR038W	ORM1	6	0.6874552	0.1196543	0.04884866
Paraquat	YGR039W		6	0.2182571	0.02770435	0.01131025
Paraquat	YGR040W	KSS1	6	0.6107636	0.1223884	0.04996486
Paraquat	YGR041W	BUD9	6	0.07111948	0.04404718	0.01798218
Paraquat	YGR042W	MTE1	6	0.4040786	0.1099561	0.04488938
Paraquat	YGR043C	NQM1	6	0.04459278	0.03016288	0.01231395
Paraquat	YGR044C	RME1	6	0.1082043	0.05473738	0.02234644
Paraquat	YGR045C		6	0.9787023	0.1515805	0.0618825
Paraquat	YGR049W	SCM4	6	-0.01645241	0.03945572	0.01610773
Paraquat	YGR050C		6	0.677485	0.04492184	0.01833926
Paraquat	YGR051C		6	0.7658553	0.09100119	0.03715108
Paraquat	YGR052W	FMP48	6	0.7649987	0.1574782	0.06429021
Paraquat	YGR053C		6	0.6704918	0.129031	0.05267669
Paraquat	YGR054W		6	0.3787381	0.06628832	0.0270621
Paraquat	YGR055W	MUP1	6	0.505308	0.1656793	0.06763829
Paraquat	YGR058W	PEF1	6	-0.04630206	0.02467302	0.01007272
Paraquat	YGR059W	SPR3	6	0.6273814	0.1340651	0.05473187
Paraquat	YGR061C	ADE6	5	0.1304408	0.05547886	0.0248109
Paraquat	YGR063C	SPT4	12	0.5098826	0.04517989	0.01304231
Paraquat	YGR064W		16	0.7538028	0.6764722	0.169118
Paraquat	YGR066C		6	0.5118856	0.1430874	0.0584152
Paraquat	YGR067C		6	0.07901842	0.06849534	0.02796311
Paraquat	YGR068C	ART5	6	0.3227976	0.06646657	0.02713486
Paraquat	YGR069W		6	0.02965945	0.02430591	0.009922847
Paraquat	YGR070W	ROM1	6	0.5764135	0.1196503	0.04884703
Paraquat	YGR071C	ENV11	6	-0.005440881	0.0472336	0.01928304
Paraquat	YGR072W	UPF3	6	0.4287155	0.04149942	0.01694207
Paraquat	YGR076C	MRPL25	16	0.3056281	0.2462945	0.06157363
Paraquat	YGR077C	PEX8	6	0.6122123	0.0624517	0.0254958
Paraquat	YGR078C	PAC10	6	0.6332158	0.03561747	0.01454077
Paraquat	YGR079W		6	0.8643728	0.1323299	0.05402347
Paraquat	YGR080W	TWF1	6	0.7915602	0.1358389	0.055456
Paraquat	YGR081C	SLX9	6	0.7598425	0.2230969	0.09107895
Paraquat	YGR084C	MRP13	6	0.6586258	0.1327267	0.05418546
Paraquat	YGR085C	RPL11B	6	0.719973	0.1024532	0.04182633
Paraquat	YGR086C	PIL1	6	0.638795	0.07873931	0.03214519
Paraquat	YGR087C	PDC6	6	0.6960679	0.1413047	0.05768742
Paraquat	YGR088W	CTT1	6	0.6705564	0.08305336	0.03390639
Paraquat	YGR089W	NNF2	6	0.6914279	0.1198095	0.04891202
Paraquat	YGR092W	DBF2	6	0.7706297	0.1428919	0.05833537
Paraquat	YGR093W	DRN1	6	0.7400639	0.0599946	0.02449269
Paraquat	YGR096W	TPC1	6	0.04817559	0.04585753	0.01872126
Paraquat	YGR097W	ASK10	6	0.4719456	0.1053479	0.04300809
Paraquat	YGR100W	MDR1	6	0.8926925	0.1477672	0.06032569
Paraquat	YGR101W	PCP1	6	-0.1724904	0.1154636	0.04713781
Paraquat	YGR102C	GTF1	16	0.1058143	0.2210951	0.05527378
Paraquat	YGR104C	SRB5	14	0.4388384	0.2483547	0.06637559
Paraquat	YGR105W	VMA21	5	1.774716	0.06226212	0.02784447
Paraquat	YGR106C	VOA1	6	0.08630042	0.0188268	0.007686008
Paraquat	YGR107W		6	0.7468339	0.1082306	0.04418496
Paraquat	YGR108W	CLB1	6	0.01868468	0.02881561	0.01176393
Paraquat	YGR109C	CLB6	6	0.587418	0.06686279	0.02729662
Paraquat	YGR110W	CLD1	6	1.780285	0.18477	0.07543203
Paraquat	YGR111W		6	0.8216184	0.08700235	0.03551856
Paraquat	YGR117C		6	0.8559335	0.09574527	0.03908784
Paraquat	YGR118W	RPS23A	6	0.9328975	0.04873649	0.01989659
Paraquat	YGR121C	MEP1	6	0.1138929	0.05121087	0.02090675
Paraquat	YGR122C-A		6	0.4420629	0.1389959	0.05674485
Paraquat	YGR122W		6	0.1353182	0.1158966	0.04731459
Paraquat	YGR123C	PPT1	6	0.0008844607	0.009639044	0.003935123
Paraquat	YGR124W	ASN2	6	0.1393891	0.04274454	0.01745039
Paraquat	YGR125W		5	0.1381517	0.04335468	0.0193888
Paraquat	YGR126W		6	-0.06811448	0.05451339	0.022255
Paraquat	YGR127W		6	0.09736922	0.04524464	0.01847105
Paraquat	YGR129W	SYF2	6	-0.08335475	0.01799354	0.007345833
Paraquat	YGR130C		6	0.1116657	0.03933684	0.0160592
Paraquat	YGR131W	FHN1	6	0.6737703	0.07367571	0.03007798
Paraquat	YGR132C	PHB1	6	0.0382068	0.03064774	0.01251189
Paraquat	YGR133W	PEX4	6	0.01374991	0.02990772	0.01220978
Paraquat	YGR134W	CAF130	6	0.3006259	0.03793026	0.01548496
Paraquat	YGR135W	PRE9	6	0.1920159	0.06181328	0.02523517
Paraquat	YGR136W	LSB1	6	-0.006682599	0.0924524	0.03774353
Paraquat	YGR137W		6	-0.03945697	0.02303669	0.009404688
Paraquat	YGR138C	TPO2	6	-0.06911183	0.06015599	0.02455858
Paraquat	YGR139W		6	0.08939116	0.02500087	0.01020656
Paraquat	YGR141W	VPS62	6	0.7732936	0.1144669	0.0467309
Paraquat	YGR142W	BTN2	6	0.04007181	0.03757743	0.01534092
Paraquat	YGR143W	SKN1	6	-0.09019103	0.04129133	0.01685711
Paraquat	YGR144W	THI4	6	0.2820162	0.02271938	0.009275147
Paraquat	YGR146C	ECL1	6	0.06074709	0.03112063	0.01270494
Paraquat	YGR148C	RPL24B	6	0.08384617	0.02758625	0.01126204
Paraquat	YGR149W		6	-0.0861306	0.02665143	0.0108804
Paraquat	YGR150C	CCM1	20	0.8682254	0.8200899	0.1833777
Paraquat	YGR151C		6	0.140333	0.04534498	0.01851201
Paraquat	YGR152C	RSR1	6	0.004596825	0.05387273	0.02199345
Paraquat	YGR153W		6	-0.1157525	0.04784301	0.01953183
Paraquat	YGR154C	GTO1	6	0.00341423	0.02597639	0.01060482
Paraquat	YGR155W	CYS4	16	0.7949076	0.613216	0.153304
Paraquat	YGR157W	CHO2	6	0.202735	0.01528572	0.00624037
Paraquat	YGR159C	NSR1	20	0.4574619	0.2024113	0.04526053
Paraquat	YGR160W		20	0.1838508	0.2031696	0.04543011
Paraquat	YGR161C	RTS3	6	0.1724907	0.02923982	0.01193711
Paraquat	YGR163W	GTR2	6	0.301251	0.0585386	0.02389828
Paraquat	YGR164W		6	0.5791707	0.09059133	0.03698375
Paraquat	YGR166W	TRS65	6	0.6054937	0.03855759	0.01574107
Paraquat	YGR168C		6	0.03698059	0.01563522	0.006383051
Paraquat	YGR169C	PUS6	6	0.01322753	0.01852504	0.007562817
Paraquat	YGR170W	PSD2	6	-0.05293742	0.01396504	0.005701204
Paraquat	YGR173W	RBG2	6	0.009311496	0.02140046	0.008736701
Paraquat	YGR174C	CBP4	6	0.4616214	0.02872963	0.01172882
Paraquat	YGR176W		6	-0.001332895	0.01957545	0.007991643
Paraquat	YGR177C	ATF2	6	0.8516312	0.1025734	0.04187541
Paraquat	YGR178C	PBP1	6	0.02462312	0.02006187	0.008190224
Paraquat	YGR181W	TIM13	6	0.6874005	0.03166699	0.01292799
Paraquat	YGR182C		6	0.5985637	0.1133236	0.04626415
Paraquat	YGR183C	QCR9	6	0.5883237	0.07344717	0.02998468
Paraquat	YGR184C	UBR1	6	0.5845759	0.05831207	0.0238058
Paraquat	YGR187C	HGH1	6	0.7993156	0.1512092	0.0617309
Paraquat	YGR188C	BUB1	6	0.4192947	0.2664346	0.1087715
Paraquat	YGR189C	CRH1	6	0.6042322	0.2738144	0.1117843
Paraquat	YGR192C	TDH3	6	0.4650255	0.1277834	0.05216735
Paraquat	YGR193C	PDX1	6	0.5856789	0.08104653	0.03308711
Paraquat	YGR194C	XKS1	6	1.298557	0.1206071	0.04923766
Paraquat	YGR196C	FYV8	6	0.06999015	0.04060741	0.0165779
Paraquat	YGR197C	SNG1	6	0.7236804	0.04352514	0.01776906
Paraquat	YGR199W	PMT6	6	0.9785715	0.08531574	0.03483
Paraquat	YGR200C	ELP2	6	0.6770746	0.1017111	0.04152337
Paraquat	YGR201C		6	0.9921153	0.07811975	0.03189225
Paraquat	YGR202C	PCT1	6	0.9595317	0.06034714	0.02463662
Paraquat	YGR203W	YCH1	6	0.2629054	0.04879506	0.0199205
Paraquat	YGR204W	ADE3	16	0.2820973	0.284169	0.07104225
Paraquat	YGR205W	TDA10	6	0.5346429	0.2372486	0.09685633
Paraquat	YGR206W	MVB12	6	0.6725776	0.1562907	0.06380542
Paraquat	YGR207C	CIR1	6	0.09201246	0.07949289	0.03245284
Paraquat	YGR208W	SER2	6	0.1106307	0.02675148	0.01092125
Paraquat	YGR209C	TRX2	6	0.09401835	0.04009153	0.0163673
Paraquat	YGR210C		6	0.8305588	0.0734405	0.02998196
Paraquat	YGR212W	SLI1	6	0.5972166	0.02522585	0.01029841
Paraquat	YGR213C	RTA1	6	0.6686551	0.07882713	0.03218104
Paraquat	YGR214W	RPS0A	6	0.6420721	0.0585774	0.02391412
Paraquat	YGR215W	RSM27	12	0.3709033	0.4681685	0.1351486
Paraquat	YGR217W	CCH1	6	0.871189	0.1282354	0.05235189
Paraquat	YGR219W		12	0.1347522	0.12748	0.03680032
Paraquat	YGR220C	MRPL9	16	0.3231897	0.2339609	0.05849022
Paraquat	YGR221C	TOS2	6	0.132429	0.05867694	0.02395476
Paraquat	YGR222W	PET54	20	0.1777499	0.3092815	0.06915744
Paraquat	YGR223C	HSV2	6	0.586402	0.1504242	0.0614104
Paraquat	YGR224W	AZR1	6	0.5319088	0.187325	0.07647511
Paraquat	YGR225W	AMA1	6	0.6209162	0.05052518	0.02062682
Paraquat	YGR226C		6	0.7462951	0.06469645	0.02641222
Paraquat	YGR227W	DIE2	6	0.03212266	0.03722793	0.01519824
Paraquat	YGR228W		6	0.6883975	0.02248924	0.009181195
Paraquat	YGR229C	SMI1	6	0.6485677	0.03776631	0.01541803
Paraquat	YGR230W	BNS1	6	0.6469462	0.04767503	0.01946325
Paraquat	YGR231C	PHB2	6	0.07120811	0.06771438	0.02764428
Paraquat	YGR232W	NAS6	6	0.6332984	0.0241279	0.009850173
Paraquat	YGR233C	PHO81	6	0.7618663	0.08232895	0.03361065
Paraquat	YGR234W	YHB1	6	0.8377787	0.1672978	0.06829905
Paraquat	YGR235C	MIC26	6	0.01038236	0.03469144	0.01416272
Paraquat	YGR236C	SPG1	6	0.2847104	0.0838972	0.03425089
Paraquat	YGR237C		6	0.6773245	0.06959201	0.02841082
Paraquat	YGR238C	KEL2	6	-0.09479216	0.04767301	0.01946243
Paraquat	YGR239C	PEX21	6	0.6075261	0.05653018	0.02307835
Paraquat	YGR240C	PFK1	12	0.9572509	0.7309757	0.2110145
Paraquat	YGR241C	YAP1802	6	0.6580362	0.02628813	0.01073209
Paraquat	YGR242W		6	0.05443547	0.03672503	0.01499293
Paraquat	YGR243W	MPC3	6	0.1386489	0.05580732	0.02278324
Paraquat	YGR244C	LSC2	6	0.4886588	0.04300377	0.01755621
Paraquat	YGR247W	CPD1	6	0.5687482	0.04666346	0.01905028
Paraquat	YGR248W	SOL4	6	0.550635	0.1348991	0.05507233
Paraquat	YGR249W	MGA1	6	0.1014938	0.0719756	0.02938392
Paraquat	YGR250C		6	0.3856786	0.2676157	0.1092537
Paraquat	YGR254W	ENO1	6	0.1283651	0.05612856	0.02291439
Paraquat	YGR255C	COQ6	6	0.4450139	0.1330988	0.05433734
Paraquat	YGR256W	GND2	6	0.09364478	0.01378301	0.00562689
Paraquat	YGR258C	RAD2	13	0.4233588	0.6306229	0.1749033
Paraquat	YGR259C		6	0.5225469	0.07196947	0.02938141
Paraquat	YGR260W	TNA1	6	0.5576349	0.06288766	0.02567378
Paraquat	YGR261C	APL6	6	0.2496084	0.02600183	0.0106152
Paraquat	YGR262C	BUD32	16	0.4178558	0.1800081	0.04500204
Paraquat	YGR263C	SAY1	6	0.6165923	0.06323067	0.02581381
Paraquat	YGR266W		6	0.2634756	0.08424309	0.0343921
Paraquat	YGR268C	HUA1	6	0.1739409	0.03157379	0.01288995
Paraquat	YGR269W		6	1.221786	0.07233713	0.02953151
Paraquat	YGR270W	YTA7	6	0.08845952	0.03027854	0.01236116
Paraquat	YGR271W	SLH1	6	-0.04433511	0.05002958	0.02042449
Paraquat	YGR272C		6	2.177704	0.1059617	0.0432587
Paraquat	YGR273C		6	0.07711525	0.07391007	0.03017366
Paraquat	YGR275W	RTT102	6	0.01796652	0.07901553	0.03225796
Paraquat	YGR276C	RNH70	6	0.04693704	0.04974889	0.0203099
Paraquat	YGR279C	SCW4	6	0.2686989	0.1889329	0.07713152
Paraquat	YGR281W	YOR1	6	0.6555995	0.06762331	0.0276071
Paraquat	YGR282C	BGL2	6	0.4822375	0.05970366	0.02437392
Paraquat	YGR283C		6	-0.04785785	0.04738054	0.01934302
Paraquat	YGR284C	ERV29	6	0.788271	0.1404265	0.05732887
Paraquat	YGR286C	BIO2	6	0.1469091	0.03777262	0.01542061
Paraquat	YGR287C	IMA1	6	0.4375777	0.02787279	0.01137902
Paraquat	YGR288W	MAL13	6	-0.09659622	0.05765671	0.02353825
Paraquat	YGR289C	MAL11	6	0.002035031	0.02589152	0.01057017
Paraquat	YGR290W		6	0.1867774	0.0558986	0.02282051
Paraquat	YGR291C		6	0.1907814	0.05437833	0.02219986
Paraquat	YGR292W	MAL12	6	0.02951222	0.0272735	0.01113436
Paraquat	YGR295C	COS6	6	0.2594834	0.1324006	0.0540523
Paraquat	YHL002W	HSE1	6	-0.1152933	0.02896204	0.0118237
Paraquat	YHL003C	LAG1	6	0.005313404	0.04047054	0.01652203
Paraquat	YHL005C		6	0.139934	0.01978367	0.008076648
Paraquat	YHL006C	SHU1	6	-0.05771995	0.04620163	0.01886174
Paraquat	YHL007C	STE20	6	0.07774198	0.02620539	0.01069831
Paraquat	YHL008C		6	0.6749038	0.04267042	0.01742013
Paraquat	YHL009C	YAP3	6	0.3921452	0.1865341	0.07615223
Paraquat	YHL010C	ETP1	6	-0.1235055	0.02590647	0.01057627
Paraquat	YHL012W		6	0.1977726	0.09078142	0.03706136
Paraquat	YHL013C	OTU2	6	0.5171424	0.06425287	0.02623112
Paraquat	YHL014C	YLF2	6	0.2161941	0.08350014	0.03408879
Paraquat	YHL016C	DUR3	6	0.230471	0.06045961	0.02468253
Paraquat	YHL017W		6	-0.08253291	0.04746307	0.01937672
Paraquat	YHL019C	APM2	6	0.7143913	0.06968392	0.02844834
Paraquat	YHL020C	OPI1	6	0.338486	0.04525304	0.01847448
Paraquat	YHL021C	AIM17	6	0.06271979	0.03763978	0.01536637
Paraquat	YHL022C	SPO11	6	-0.0375804	0.03125758	0.01276085
Paraquat	YHL023C	NPR3	6	0.03447037	0.0313506	0.01279883
Paraquat	YHL024W	RIM4	6	0.3502338	0.03287094	0.01341951
Paraquat	YHL025W	SNF6	6	0.06773603	0.02485957	0.01014888
Paraquat	YHL026C		6	0.06619086	0.03111135	0.01270116
Paraquat	YHL027W	RIM101	6	0.01327951	0.02275818	0.009290989
Paraquat	YHL028W	WSC4	6	0.02160741	0.04402816	0.01797442
Paraquat	YHL029C	OCA5	6	0.1344402	0.06357306	0.02595359
Paraquat	YHL030W	ECM29	6	0.5003001	0.07844256	0.03202404
Paraquat	YHL031C	GOS1	3	2.299492	0.11189	0.06459972
Paraquat	YHL032C	GUT1	6	0.03105221	0.06520758	0.02662088
Paraquat	YHL033C	RPL8A	6	0.1226424	0.04975081	0.02031068
Paraquat	YHL034C	SBP1	6	0.0302127	0.03048792	0.01244664
Paraquat	YHL035C	VMR1	6	0.2217239	0.04914742	0.02006435
Paraquat	YHL036W	MUP3	6	0.5732963	0.0518126	0.02115241
Paraquat	YHL037C		6	0.03640424	0.02596025	0.01059823
Paraquat	YHL039W	EFM1	6	0.4680257	0.2592223	0.1058271
Paraquat	YHL040C	ARN1	6	0.3263462	0.2446566	0.09988063
Paraquat	YHL041W		6	0.5135688	0.1868095	0.07626467
Paraquat	YHL042W		6	0.6853741	0.07107238	0.02901518
Paraquat	YHL043W	ECM34	6	0.6210832	0.09581908	0.03911798
Paraquat	YHL044W		6	0.4133683	0.02948375	0.01203669
Paraquat	YHL045W		6	0.09853617	0.01660359	0.006778388
Paraquat	YHL046C	PAU13	6	0.6974247	0.03313573	0.0135276
Paraquat	YHL047C	ARN2	6	-0.02973666	0.02002947	0.008176996
Paraquat	YHR001W-A	QCR10	6	0.01274601	0.02513622	0.01026182
Paraquat	YHR003C	TCD1	6	0.6992551	0.03544562	0.01447061
Paraquat	YHR004C	NEM1	6	0.07664644	0.1424663	0.05816163
Paraquat	YHR005C	GPA1	6	0.03147194	0.0399715	0.0163183
Paraquat	YHR006W	STP2	6	-0.06707053	0.06440706	0.02629407
Paraquat	YHR008C	SOD2	6	1.51633	0.06438411	0.0262847
Paraquat	YHR009C	TDA3	6	0.03151479	0.01779116	0.00726321
Paraquat	YHR011W	DIA4	8	-0.07164763	0.0964452	0.03409853
Paraquat	YHR012W	VPS29	6	0.2443426	0.04620455	0.01886293
Paraquat	YHR013C	ARD1	8	0.7082789	0.1066831	0.03771817
Paraquat	YHR014W	SPO13	6	0.128246	0.07082926	0.02891593
Paraquat	YHR015W	MIP6	6	0.633381	0.03792256	0.01548182
Paraquat	YHR016C	YSC84	6	0.1216879	0.0367912	0.01501994
Paraquat	YHR017W	YSC83	6	0.612764	0.04676935	0.01909351
Paraquat	YHR018C	ARG4	6	0.0237076	0.02725018	0.01112484
Paraquat	YHR021C	RPS27B	6	0.406985	0.07763068	0.03169259
Paraquat	YHR021W-A	ECM12	6	0.5571686	0.1611407	0.06578542
Paraquat	YHR022C		6	0.5101141	0.1677948	0.06850192
Paraquat	YHR025W	THR1	6	-0.1910075	0.3071112	0.1253776
Paraquat	YHR026W	VMA16	8	1.470009	0.1230212	0.04349455
Paraquat	YHR028C	DAP2	6	0.5991988	0.09228663	0.03767586
Paraquat	YHR029C	YHI9	6	0.6452971	0.08204067	0.03349297
Paraquat	YHR030C	SLT2	6	-0.01227241	0.03527726	0.01440188
Paraquat	YHR031C	RRM3	6	0.8900252	0.1225409	0.05002712
Paraquat	YHR032W	ERC1	6	0.3080555	0.07133154	0.02912098
Paraquat	YHR033W		6	0.05560324	0.01981251	0.008088425
Paraquat	YHR034C	PIH1	6	0.1456581	0.0395709	0.01615475
Paraquat	YHR035W	NEL1	6	0.6410099	0.04466784	0.01823557
Paraquat	YHR037W	PUT2	6	0.6188549	0.06582764	0.02687402
Paraquat	YHR038W	RRF1	8	0.06268721	0.0819871	0.02898682
Paraquat	YHR039C	MSC7	6	0.5681471	0.1552857	0.06339511
Paraquat	YHR039C-B	NA	16	1.451854	0.3780747	0.09451867
Paraquat	YHR041C	SRB2	6	0.004560991	0.0270178	0.01102997
Paraquat	YHR043C	DOG2	6	0.1905024	0.03448595	0.01407883
Paraquat	YHR044C	DOG1	6	0.1580146	0.04555793	0.01859895
Paraquat	YHR045W		6	0.1271156	0.02605333	0.01063623
Paraquat	YHR046C	INM1	6	0.2713596	0.05406832	0.0220733
Paraquat	YHR047C	AAP1	6	0.1413728	0.07488152	0.03057025
Paraquat	YHR048W	YHK8	6	0.1028237	0.0462597	0.01888544
Paraquat	YHR049C-A		6	0.02978035	0.04021383	0.01641723
Paraquat	YHR049W	FSH1	6	0.009617417	0.02597034	0.01060235
Paraquat	YHR050W	SMF2	6	0.3571269	0.2733721	0.1116037
Paraquat	YHR057C	CPR2	6	0.05120971	0.04602387	0.01878917
Paraquat	YHR059W	FYV4	6	0.1181811	0.04477565	0.01827958
Paraquat	YHR060W	VMA22	16	1.464994	0.4166246	0.1041561
Paraquat	YHR061C	GIC1	6	0.6891045	0.09407318	0.03840522
Paraquat	YHR064C	SSZ1	16	0.5442081	0.4997539	0.1249385
Paraquat	YHR066W	SSF1	6	0.1071256	0.03970503	0.01620951
Paraquat	YHR067W	HTD2	6	0.209322	0.08948253	0.03653109
Paraquat	YHR073W	OSH3	6	0.01167604	0.03066677	0.01251966
Paraquat	YHR075C	PPE1	6	0.4982921	0.04012098	0.01637932
Paraquat	YHR076W	PTC7	6	0.2113084	0.03007826	0.0122794
Paraquat	YHR077C	NMD2	6	0.01975231	0.01535772	0.006269762
Paraquat	YHR078W		6	0.4573989	0.1409619	0.05754745
Paraquat	YHR079C	IRE1	6	0.2919797	0.1649074	0.06732316
Paraquat	YHR079C-B	NA	6	0.0493991	0.02162278	0.008827464
Paraquat	YHR080C	LAM4	6	-0.07869117	0.04427034	0.01807329
Paraquat	YHR081W	LRP1	6	0.4141173	0.1041784	0.04253066
Paraquat	YHR082C	KSP1	6	-0.02663525	0.03543482	0.01446621
Paraquat	YHR086W	NAM8	6	0.07239221	0.03829842	0.01563527
Paraquat	YHR087W	RTC3	6	0.1057916	0.02297879	0.009381051
Paraquat	YHR092C	HXT4	6	0.01824283	0.050926	0.02079045
Paraquat	YHR093W	AHT1	6	0.0332822	0.03203462	0.01307808
Paraquat	YHR094C	HXT1	6	-0.01327604	0.07377165	0.03011715
Paraquat	YHR095W		6	-0.04837537	0.04424885	0.01806452
Paraquat	YHR096C	HXT5	6	0.002700229	0.05819173	0.02375667
Paraquat	YHR097C		6	0.01260805	0.04738454	0.01934466
Paraquat	YHR103W	SBE22	6	0.004941992	0.02581214	0.01053776
Paraquat	YHR104W	GRE3	6	0.6500239	0.1018238	0.04156938
Paraquat	YHR105W	YPT35	6	0.752648	0.0800723	0.03268938
Paraquat	YHR106W	TRR2	6	0.05727988	0.0219303	0.008953008
Paraquat	YHR108W	GGA2	6	0.6645295	0.05391316	0.02200995
Paraquat	YHR109W	CTM1	6	0.7173986	0.0872381	0.03561481
Paraquat	YHR110W	ERP5	6	0.6766549	0.08277169	0.0337914
Paraquat	YHR111W	UBA4	6	1.132003	0.1322398	0.05398667
Paraquat	YHR112C		6	0.6366772	0.1452936	0.05931588
Paraquat	YHR113W	APE4	6	0.2959992	0.02703024	0.01103505
Paraquat	YHR114W	BZZ1	6	0.01898651	0.03203918	0.01307994
Paraquat	YHR115C	DMA1	6	0.6060386	0.06555101	0.02676109
Paraquat	YHR116W	COX23	6	-0.05633148	0.03175954	0.01296578
Paraquat	YHR117W	TOM71	6	0.6717078	0.09632944	0.03932633
Paraquat	YHR120W	MSH1	16	0.7083346	0.480469	0.1201173
Paraquat	YHR121W	LSM12	6	0.7591579	0.04949548	0.02020644
Paraquat	YHR123W	EPT1	6	0.7184133	0.04449549	0.01816521
Paraquat	YHR124W	NDT80	6	0.738235	0.05644018	0.02304161
Paraquat	YHR125W		6	0.747771	0.04259938	0.01739112
Paraquat	YHR126C	ANS1	6	0.6351646	0.02464539	0.01006144
Paraquat	YHR127W		6	-0.01447044	0.0332992	0.01359434
Paraquat	YHR129C	ARP1	6	0.06162142	0.03901589	0.01592817
Paraquat	YHR130C		6	0.5151017	0.1777665	0.07257286
Paraquat	YHR131C		6	0.002144315	0.02706992	0.01105125
Paraquat	YHR132C	ECM14	6	0.4842255	0.03932939	0.01605616
Paraquat	YHR132W-A	IGO2	6	0.04974232	0.04141473	0.01690749
Paraquat	YHR133C	NSG1	6	0.7127513	0.08343857	0.03406365
Paraquat	YHR134W	WSS1	6	0.1796754	0.02453126	0.01001485
Paraquat	YHR135C	YCK1	6	0.8007851	0.04736861	0.01933816
Paraquat	YHR136C	SPL2	6	-0.04229383	0.01840493	0.00751378
Paraquat	YHR137W	ARO9	6	0.465618	0.05946667	0.02427717
Paraquat	YHR138C		6	0.07050031	0.04347943	0.0177504
Paraquat	YHR139C	SPS100	6	-0.02445364	0.02206641	0.009008575
Paraquat	YHR139C-A		6	-0.0001525727	0.02774402	0.01132645
Paraquat	YHR140W		6	0.2298541	0.1402906	0.0572734
Paraquat	YHR142W	CHS7	6	0.04316592	0.04042857	0.01650489
Paraquat	YHR143W	DSE2	6	0.1199784	0.09212991	0.03761188
Paraquat	YHR146W	CRP1	6	0.355583	0.01864677	0.00761251
Paraquat	YHR150W	PEX28	6	0.6011768	0.04243301	0.0173232
Paraquat	YHR151C	MTC6	6	0.7668305	0.05901958	0.02409464
Paraquat	YHR152W	SPO12	6	0.1317662	0.05954813	0.02431042
Paraquat	YHR153C	SPO16	6	-0.0233049	0.05026777	0.02052173
Paraquat	YHR154W	RTT107	6	0.05269696	0.05950107	0.02429121
Paraquat	YHR155W	LAM1	6	0.03526474	0.06921741	0.02825789
Paraquat	YHR156C	LIN1	6	0.5253691	0.1348563	0.05505483
Paraquat	YHR157W	REC104	6	0.5004118	0.1884779	0.07694576
Paraquat	YHR158C	KEL1	6	0.04715536	0.03268906	0.01334525
Paraquat	YHR159W	TDA11	6	0.5945197	0.06406493	0.0261544
Paraquat	YHR160C	PEX18	6	0.3138567	0.07629849	0.03114873
Paraquat	YHR161C	YAP1801	6	0.5987988	0.07546553	0.03080867
Paraquat	YHR162W	MPC2	6	0.04349212	0.05867264	0.02395301
Paraquat	YHR163W	SOL3	6	0.3155402	0.01628914	0.006650015
Paraquat	YHR167W	THP2	6	0.7181296	0.06544185	0.02671652
Paraquat	YHR171W	ATG7	6	0.5530067	0.06430591	0.02625278
Paraquat	YHR176W	FMO1	6	0.05339677	0.1251425	0.05108922
Paraquat	YHR178W	STB5	3	0.5513141	0.1158244	0.06687127
Paraquat	YHR179W	OYE2	6	0.01358335	0.05686141	0.02321357
Paraquat	YHR180W		6	0.2908691	0.04467347	0.01823787
Paraquat	YHR181W	SVP26	6	0.4698242	0.08863583	0.03618543
Paraquat	YHR182W		6	0.1505561	0.007724603	0.003153556
Paraquat	YHR184W	SSP1	6	0.6842328	0.07621743	0.03111564
Paraquat	YHR185C	PFS1	6	0.04021996	0.02897834	0.01183036
Paraquat	YHR189W	PTH1	6	0.1787213	0.06009269	0.02453274
Paraquat	YHR191C	CTF8	6	0.2062665	0.02222164	0.009071947
Paraquat	YHR193C	EGD2	6	0.04014894	0.01711556	0.0069874
Paraquat	YHR194W	MDM31	6	0.1659767	0.03045776	0.01243433
Paraquat	YHR195W	NVJ1	6	0.3716874	0.2352073	0.09602299
Paraquat	YHR198C	AIM18	6	0.5750218	0.09095722	0.03713313
Paraquat	YHR199C	AIM46	6	0.6156204	0.09565226	0.03904987
Paraquat	YHR200W	RPN10	6	0.1385065	0.03028026	0.01236186
Paraquat	YHR202W		6	0.01682039	0.03551357	0.01449836
[truncated: 2,581 more rows]
