# Supplementary material for: Genetically controlled mtDNA deletions prevent ROS damage by arresting oxidative phosphorylation
Source: eLife. 2022 Jul 8;11:e76095. doi: 10.7554/eLife.76095 (PMC9427111; doi:10.7554/eLife.76095)
Supplement: Figure 1—figure supplement 2—source data 2. [file elife-76095-fig1-figsupp2-data2.xlsx]

## Sheet: Data S9 - Aneuploidy panel
README: For Simulations in Fig S2 each aneuploidy phenotype is calculated as (Aneup. - Control) (log2 scale) to take marker effects into account. For Chr 11 the control strain was missing, in which the general MERV control was used which has the same marker makeup expect for the heterozygote essential gene knockout.
Multiple entries for the same Chr/Type combinations are replicate segregants isolated
For Fig S5E the Dnorm is converted into Dabsnorm by the formula 2^Dnorm * Dabscontrol where the Dabscontrol is the average absolute doubling time of all spatial controls in respective environment, the Dabscontrol measured was:
Dabscontrol Glycerol = 3.337148
Dabscontrol Paraquat = 3.126538
Chr	Method	Type	Environment	N	Generation time Dnorm	SD Dnorm	SEM Dnorm
5	Backcross	Control	Paraquat	9	0.195966614296218	0.309400913603421	0.103133637867807
5	Backcross	Aneup.	Paraquat	9	-0.0737610810622864	0.121576875452801	0.0405256251509337
5	Backcross	Aneup.	Paraquat	6	0.0249045707746146	0.303421071901102	0.123871133894338
5	Backcross	Control	Paraquat	9	0.334630986597036	0.171380559560471	0.0571268531868237
5	Backcross	Aneup.	Paraquat	9	0.03811519	0.1803259	0.06010863
16	Backcross	Aneup.	Paraquat	7	-0.131076940110804	0.271278565438986	0.102533660024845
16	Backcross	Aneup.	Paraquat	9	0.0381151859831986	0.180325878035518	0.0601086260118393
10	Backcross	Aneup.	Paraquat	9	0.0556954390977333	0.232967244064675	0.0776557480215584
10	Backcross	Aneup.	Paraquat	9	-0.184995580152404	0.208987506774884	0.0696625022582947
10	Backcross	Aneup.	Paraquat	6	-0.0189841464773859	0.148416667571976	0.0605908508126025
10	Backcross	Control	Paraquat	5	-0.0120919218036934	0.191622261734195	0.0856960806479833
10	Backcross	Control	Paraquat	7	-0.0358457705489761	0.157065521591884	0.0593651870963959
10	Backcross	Control	Paraquat	6	0.0881025064418766	0.14519805593741	0.0592768581151239
2	Backcross	Aneup.	Paraquat	9	-0.263423434378756	0.153508986528717	0.0511696621762391
2	Backcross	Aneup.	Paraquat	9	-0.252072724310718	0.0852665687259735	0.0284221895753245
2	Backcross	Control	Paraquat	9	-0.00912781989906235	0.153820442291307	0.0512734807637689
2	Backcross	Control	Paraquat	9	0.0122225032376331	0.108484689847576	0.0361615632825254
3	Backcross	Aneup.	Paraquat	7	-0.16650389214941	0.245346346406384	0.0927322025242282
3	Backcross	Aneup.	Paraquat	5	-0.080879072881133	0.122029213059766	0.0545731231284882
3	Backcross	Control	Paraquat	9	-0.0721001718829358	0.394613198703423	0.131537732901141
3	Backcross	Control	Paraquat	8	0.0463402928164044	0.207332894207367	0.0733032477285313
12	MERV	Aneup.	Paraquat	5	0.214178099762027	0.480240526576587	0.214770092595108
12	MERV	Aneup.	Paraquat	6	0.475513126698777	0.088177946270892	0.035998495821706
12	MERV	Aneup.	Paraquat	6	0.419639882339113	0.12168105945155	0.0496760845029271
12	MERV	Aneup.	Paraquat	6	0.371024213207431	0.177822348551747	0.0725956698025199
12	MERV	Aneup.	Paraquat	6	0.40522473242987	0.160702154294398	0.0656063797645478
12	MERV	Aneup.	Paraquat	7	0.45239480653597	0.194642813014623	0.0735680682461054
12	MERV	Aneup.	Paraquat	8	0.422042952809008	0.245978095276997	0.0869663895968575
12	MERV	Control	Paraquat	9	0.0555665379401905	0.253423765273397	0.0844745884244656
12	MERV	Aneup.	Paraquat	9	0.620924094940181	0.176738272065945	0.0589127573553149
12	MERV	Aneup.	Paraquat	9	0.490407545961032	0.123565519696413	0.041188506565471
12	MERV	Control	Paraquat	9	-0.188251465464362	0.285734517980164	0.0952448393267212
14	MERV	Aneup.	Paraquat	17	0.700259835535618	0.252646502813595	0.0612757774731389
14	MERV	Aneup.	Paraquat	13	0.445281210276842	0.353996257891978	0.0981808968578385
14	MERV	Aneup.	Paraquat	10	0.530257489727812	0.187217642453645	0.0592034168320553
14	MERV	Control	Paraquat	9	-0.342721994218095	0.372555443593623	0.124185147864541
15	MERV	Aneup.	Paraquat	14	0.170325706815542	0.123561712263324	0.0330232566723217
15	MERV	Aneup.	Paraquat	15	0.211801276197362	0.241761928985896	0.0624226616472902
15	MERV	Aneup.	Paraquat	17	0.296221733417382	0.130117016553426	0.0315580119376481
15	MERV	Aneup.	Paraquat	11	0.139750384958213	0.243881779755466	0.0735331233320884
15	MERV	Control	Paraquat	9	-0.184905751281652	0.164001328347522	0.0546671094491738
13	MERV	Aneup.	Paraquat	7	-0.196459572553632	0.231076894674614	0.0873388567202994
13	MERV	Aneup.	Paraquat	11	-0.272419510139671	0.292952278232829	0.0883284353070995
13	MERV	Aneup.	Paraquat	13	-0.212831991431437	0.344776668297629	0.0956238427792877
13	MERV	Aneup.	Paraquat	4	-0.158485172175178	0.486863493577469	0.243431746788735
13	MERV	Control	Paraquat	9	0.0764084182140291	0.0866127610866628	0.0288709203622209
4	MERV	Aneup.	Paraquat	18	0.494941536211469	0.0926605297615296	0.0218402963142385
4	MERV	Aneup.	Paraquat	18	0.632436119890708	0.158805132857816	0.0374307287769974
4	MERV	Aneup.	Paraquat	16	0.50339132929494	0.24930560698309	0.0623264017457724
4	MERV	Control	Paraquat	9	0.163741388839495	0.228351268382801	0.0761170894609337
6	MERV	Aneup.	Paraquat	54	0.551843907541811	0.23324352305263	0.0317404231826682
6	MERV	Control	Paraquat	9	0.057375062405216	0.159543031745932	0.0531810105819773
8	MERV	Aneup.	Paraquat	8	0.360537869734393	0.337180906400525	0.119211452701219
8	MERV	Aneup.	Paraquat	6	0.371285384510168	0.485732589448142	0.198299499264789
8	MERV	Aneup.	Paraquat	4	0.493795733783282	0.0804497497501997	0.0402248748750998
8	MERV	Aneup.	Paraquat	6	0.325316080434775	0.386651287410785	0.157849727091105
8	MERV	Aneup.	Paraquat	3	0.537634948373367	0.40881416560433	0.236028968560192
8	MERV	Aneup.	Paraquat	5	0.529935505740253	0.245564011963625	0.109819564715647
8	MERV	Control	Paraquat	9	0.114528388385492	0.0922614302341956	0.0307538100780652
9	MERV	Aneup.	Paraquat	8	0.290035605550579	0.28384318339449	0.10035371988591
9	MERV	Aneup.	Paraquat	7	0.533110840788028	0.0728577390909784	0.0275376369601654
9	MERV	Aneup.	Paraquat	6	0.381610474027102	0.295402562372677	0.12059759108729
9	MERV	Aneup.	Paraquat	7	0.352314021495371	0.306123117662702	0.115703662843325
9	MERV	Aneup.	Paraquat	6	0.601689209859255	0.206492523164451	0.0843002195754566
9	MERV	Aneup.	Paraquat	7	0.615815367083048	0.182014292617815	0.0687949361894398
9	MERV	Control	Paraquat	9	0.291227941803222	0.427363736538391	0.14245457884613
11	MERV	Aneup.	Paraquat	53	0.588641786686075	0.198774862022124	0.0273038271461818
MERV	MERV	Control	Paraquat	9	-0.0157056124468671	0.242744690458689	0.080914896819563
5	Backcross	Aneup.	Glycerol	12	0.670067793914678	0.145540339364753	0.0420138770550949
5	Backcross	Aneup.	Glycerol	12	0.427737700189102	0.149140533024671	0.0430531634444392
5	Backcross	Aneup.	Glycerol	12	0.563618795381119	0.162523886445303	0.0469166047944698
5	Backcross	Control	Glycerol	12	0.0369348908380734	0.144859010784007	0.0418171944353446
5	Backcross	Control	Glycerol	12	-0.09057342	0.09944936	0.02870856
2	Backcross	Aneup.	Glycerol	12	0.810980915218086	0.119729020266384	0.0345627910403034
2	Backcross	Aneup.	Glycerol	12	0.801729106322204	0.147001127626676	0.04243557030322
2	Backcross	Control	Glycerol	12	0.0430152119118693	0.102927875352738	0.0297127182710096
2	Backcross	Control	Glycerol	12	0.00317345658579571	0.154339235018669	0.0445538994422747
3	Backcross	Aneup.	Glycerol	12	0.106132417489778	0.151528437452063	0.0437424920764159
3	Backcross	Aneup.	Glycerol	12	0.0698733497242052	0.185859101911705	0.0536529012600325
3	Backcross	Control	Glycerol	12	-0.167235745978741	0.214946307283875	0.0620496541858306
3	Backcross	Control	Glycerol	12	0.0658166293816234	0.144260044175468	0.0416442876690068
