# Supplementary material for: Genetically controlled mtDNA deletions prevent ROS damage by arresting oxidative phosphorylation
Source: eLife. 2022 Jul 8;11:e76095. doi: 10.7554/eLife.76095 (PMC9427111; doi:10.7554/eLife.76095)
Supplement: Figure 1—source data 1. — Data are shown in Figure 1A and Figure 6D. [file elife-76095-fig1-data1.xlsx]

## Sheet: Data S2 - Frozen fossil record
Batch Cycle t	Environment	Population	N	Generations of selection G	Generation time Dnorm	SD Dnorm	SEM Dnorm
1	Arsenite	A1	6	3.52338636046653	0	0.14554480439445	0.0594184175799314
2	Arsenite	A1	6	7.3805776304266	-0.0257694580729917	0.171632951686435	0.0700688591132541
3	Arsenite	A1	5	11.4829792138096	-0.132324899798517	0.215346178165112	0.0963057386143945
4	Arsenite	A1	5	15.0114328481265	0.109339893412623	0.212724453683656	0.0951332677826322
5	Arsenite	A1	5	18.3093457038615	0.224832455591463	0.0992117029227358	0.0443688223797504
6	Arsenite	A1	6	22.532611876562	-0.13454100424455	0.10845497788056	0.0442765593120347
8	Arsenite	A1	6	30.5673790769037	0.04781602578325	0.133534625021747	0.0545152823828612
10	Arsenite	A1	6	39.665345421411	-0.36586664869205	0.118227589195652	0.0482662111747887
13	Arsenite	A1	6	54.025365560036	-0.401189979260883	0.187342352542285	0.0764821951568662
16	Arsenite	A1	5	68.5642755025316	-0.351204750830497	0.18594676895877	0.0831579231176515
21	Arsenite	A1	6	93.0332132659839	-0.357239222088883	0.205822012140037	0.0840264845960025
26	Arsenite	A1	6	117.546202941204	-0.474962502093883	0.0591816972589964	0.0241608267327352
31	Arsenite	A1	5	142.000111013643	-0.363774561508717	0.166965067156807	0.0746690480060875
36	Arsenite	A1	5	165.730114285806	-0.473621886291717	0.156012617586715	0.0697709636543148
41	Arsenite	A1	6	190.669118370173	-0.463250562799383	0.12553487072178	0.0512493963657687
46	Arsenite	A1	6	216.264649350832	-0.39372911031405	0.140226069112877	0.0572470529937994
51	Arsenite	A1	6	242.178965068377	-0.43182299298605	0.14820598284094	0.0605048391313303
1	Arsenite	A10	6	3.09797855766902	0	0.103178131432602	0.0421222957706155
2	Arsenite	A10	6	6.40447842351357	0.0289136074429522	0.0822682643526671	0.0335858782814055
3	Arsenite	A10	5	10.4071164324252	-0.157991775904999	0.186467858791151	0.0833909615751689
4	Arsenite	A10	5	13.5060542115422	0.0482403587448605	0.140326245279665	0.062755804694528
5	Arsenite	A10	5	16.7030991442219	-0.0498902514498135	0.117742377638928	0.0526559920466186
6	Arsenite	A10	6	20.1660757590472	-0.0199198187987361	0.098241780049332	0.0401070387572666
8	Arsenite	A10	6	28.204380725741	-0.195337486239436	0.154994426127024	0.063276209497785
10	Arsenite	A10	6	37.1507456488809	-0.125708111296236	0.0954750941000883	0.0389775439482375
13	Arsenite	A10	6	51.7980913995081	-0.435867735326219	0.213990006106665	0.0873610541693975
16	Arsenite	A10	5	66.8159919075105	-0.577012678819219	0.19846679984684	0.0887570511468758
21	Arsenite	A10	6	91.3447295243548	-0.329231477884286	0.184905101111134	0.0754871914266681
26	Arsenite	A10	6	115.008514391473	-0.324692564405119	0.173500032191177	0.0708310915374733
31	Arsenite	A10	5	138.198287280675	-0.370506721195219	0.0886738549816388	0.0396561535131805
36	Arsenite	A10	5	161.677148730938	-0.387755695184819	0.1283478917237	0.0573989221325953
41	Arsenite	A10	6	185.474591035603	-0.338880529492286	0.127620499883307	0.0521008509055037
46	Arsenite	A10	6	209.028975107808	-0.396908067808286	0.192134593683317	0.0784386194101832
51	Arsenite	A10	6	232.692032167313	-0.291992326100119	0.120481772239105	0.0491864775486713
1	Arsenite	A11	6	2.92202031696876	0	0.107934080739943	0.0440639039448702
2	Arsenite	A11	6	6.43419572104924	-0.0850131706089483	0.202458086234218	0.082653167595705
3	Arsenite	A11	5	10.3311752794038	-0.20475267774657	0.088429381861488	0.0395468218101148
4	Arsenite	A11	5	13.4285803716725	-0.08349743857767	0.135220873363966	0.0604726129637437
5	Arsenite	A11	5	16.3304326678241	-0.071600996187702	0.0423032736000004	0.0189185990880746
6	Arsenite	A11	6	20.2407680944426	-0.190906412042083	0.132102290967151	0.053930534453699
8	Arsenite	A11	6	29.0605352521771	-0.502970765310417	0.300388750866624	0.122633194015875
10	Arsenite	A11	6	38.8920570334737	-0.46694296968525	0.173236100839743	0.0707233420144504
13	Arsenite	A11	5	57.8394972873753	-0.84392601565795	0.196164980719855	0.0877276463389061
16	Arsenite	A11	4	77.4064484716482	-1.07404751659475	0.179591638079916	0.0897958190399581
21	Arsenite	A11	6	108.669708697926	-0.748712430027083	0.288260931870715	0.11768203264374
26	Arsenite	A11	6	135.352673981779	-0.458661679046417	0.290532526255049	0.118609407167771
31	Arsenite	A11	5	158.733710529242	-0.50097826072175	0.21576921128886	0.0964949247786811
36	Arsenite	A11	5	181.902343138243	-0.40553633662135	0.152974648317097	0.0684123424942307
41	Arsenite	A11	6	205.194239498387	-0.471644619951583	0.256037881532257	0.104527027429533
46	Arsenite	A11	6	228.439203800329	-0.54587571017175	0.329998236144838	0.13472121576222
51	Arsenite	A11	6	251.951838676382	-0.476243801511917	0.288106693455146	0.11761906507426
1	Arsenite	A12	6	2.74837459928716	0	0.118261678493221	0.0482801280722444
2	Arsenite	A12	6	6.32117135762682	-0.195123161139612	0.146084440177709	0.0596387229659203
3	Arsenite	A12	5	10.2207639874822	-0.222399175888162	0.0778511698644307	0.03481610158895
4	Arsenite	A12	5	13.8474890271403	-0.214188318067902	0.17805337276403	0.0796278890246959
5	Arsenite	A12	5	17.5035050206778	-0.525895364513562	0.209916265215063	0.0938774077207509
6	Arsenite	A12	6	21.8940490807277	-0.377179268155595	0.133518438690678	0.0545086743408735
8	Arsenite	A12	5	30.8201317832976	-0.644089993364962	0.164416152918331	0.0735291389048776
10	Arsenite	A12	6	40.6113318368104	-0.553924417534428	0.176572352741218	0.0720853611497844
13	Arsenite	A12	5	59.216810987242	-0.920205802430962	0.317212609260325	0.141861791525233
16	Arsenite	A12	4	79.1210292995103	-1.32388479462726	0.163353730278755	0.0816768651393773
21	Arsenite	A12	6	111.92132261504	-0.892671407942928	0.351591000721922	0.143536424987203
26	Arsenite	A12	6	139.512387004543	-0.554372844613762	0.309189151092968	0.126225942363677
31	Arsenite	A12	5	163.954665602749	-0.709146214925362	0.317872917091186	0.14215709016441
36	Arsenite	A12	5	188.364477903231	-0.586804751095162	0.212692902479011	0.0951191576549605
41	Arsenite	A12	6	212.808496256603	-0.668772042624595	0.338627182823809	0.138243968492414
46	Arsenite	A12	6	237.408774603654	-0.714479390005262	0.373427764037711	0.152451246280138
51	Arsenite	A12	6	262.142730468859	-0.639384630614762	0.368414063382853	0.150404411558895
1	Arsenite	A2	6	3.51826309337864	0	0.0848342381858117	0.0346334327121618
2	Arsenite	A2	6	7.4697852085798	0.0343880921892167	0.109397208078049	0.0446612231793832
3	Arsenite	A2	5	11.4337685751253	-0.0578165108240667	0.0824918090770264	0.036891458536633
4	Arsenite	A2	5	15.4004002738068	0.00566368368633333	0.266483992642645	0.119175264492902
5	Arsenite	A2	5	19.6000365266774	-0.139728844724867	0.184186832600444	0.0823708556509936
6	Arsenite	A2	6	24.246517151138	-0.3278220419671	0.130239032626853	0.0531698624215798
8	Arsenite	A2	6	34.6675069284669	-0.4123903711571	0.104499572569778	0.0426617718558164
10	Arsenite	A2	5	45.5977379354401	-0.466086458187867	0.0516688966430162	0.023107033043239
13	Arsenite	A2	6	62.2810347960867	-0.471547621459267	0.1135729341774	0.0463659562208885
16	Arsenite	A2	5	79.0060481691918	-0.459059411835267	0.108560682652796	0.0485498132190866
21	Arsenite	A2	6	107.501129378521	-0.481814207277767	0.0880207533635184	0.0359343220859977
26	Arsenite	A2	6	139.363497829777	-0.667988221850933	0.0812488061783032	0.033169686224522
31	Arsenite	A2	5	172.706085236078	-0.617277894548067	0.111047690422233	0.0496620369056932
36	Arsenite	A2	5	199.601171937232	-0.296848294859667	0.068313361452259	0.030550663995753
41	Arsenite	A2	6	222.782114528639	-0.213318198410767	0.0889499508366292	0.0363136653658985
46	Arsenite	A2	6	246.109213437561	-0.0866428232122333	0.157798256483629	0.0644208684476197
51	Arsenite	A2	6	269.592262496951	-0.133646902226583	0.125671327582988	0.0513051046460788
1	Arsenite	A3	6	3.51998329478575	0	0.130199733752213	0.0531538187231912
2	Arsenite	A3	6	7.30841030913022	-0.0407145690591433	0.110066010453376	0.0449342606057683
3	Arsenite	A3	5	11.2876885264834	-0.125546815942627	0.0547817558804531	0.0244991460150984
4	Arsenite	A3	5	14.7968769279869	0.136213287336833	0.126403769880102	0.0565294844128296
5	Arsenite	A3	5	18.1753461330918	0.167338308592333	0.0965312676230994	0.043170095271895
6	Arsenite	A3	6	22.0023373171688	-0.0237103223814283	0.0726121250280632	0.0296437759096551
8	Arsenite	A3	6	30.8059492937986	-0.23778394626075	0.113817815118507	0.0464659284464624
10	Arsenite	A3	6	42.4010414825311	-0.701871461024	0.189366126855124	0.0773083975603672
13	Arsenite	A3	6	59.1756904941437	-0.499415350981833	0.144176211724806	0.0588596919622081
16	Arsenite	A3	5	78.0538943151228	-0.614690963394467	0.0684430210506933	0.0306086495309598
21	Arsenite	A3	6	109.15455286611	-0.454813475877917	0.209354406791412	0.0854685786736701
26	Arsenite	A3	6	134.870629740603	-0.353863252763167	0.0803709224733736	0.0328112917027585
31	Arsenite	A3	5	158.422589219328	-0.369859588505867	0.0784118030146259	0.0350668243558053
36	Arsenite	A3	5	181.501062564706	-0.348848946857267	0.101109094404936	0.045217361646576
41	Arsenite	A3	6	204.998838203939	-0.335843525703167	0.102385270735787	0.041798611746565
46	Arsenite	A3	6	228.873495828065	-0.297206549855283	0.114201044841044	0.0466223813255432
51	Arsenite	A3	6	253.013049701412	-0.267433831865533	0.112209517165222	0.0458093435564774
1	Arsenite	A4	6	3.66088894640661	0	0.05084117396263	0.0207558223554196
2	Arsenite	A4	6	7.47166527628433	0.04032685066513	0.0614203246929519	0.025074742555633
3	Arsenite	A4	5	12.1872004740762	-0.346602972996682	0.0820445281859786	0.0366914284411491
4	Arsenite	A4	5	15.8074626937334	0.138856740039718	0.0807559546173617	0.0361151608224618
5	Arsenite	A4	5	19.2364390107621	0.169745122837438	0.104649602737393	0.0468007251078317
6	Arsenite	A4	6	23.9300344703056	-0.284015497916115	0.162091605402581	0.0661736208041467
8	Arsenite	A4	6	32.8510181857454	-0.140004806434332	0.128661425111788	0.0525258068505319
10	Arsenite	A4	6	43.2061993421972	-0.406822311974282	0.051283823641464	0.0209365333300779
13	Arsenite	A4	6	62.2744798190251	-0.661323149301948	0.0787358071820876	0.0321437586803796
16	Arsenite	A4	5	83.0661223149032	-0.657959692273082	0.0917032106146846	0.041010922537883
21	Arsenite	A4	6	114.030183197837	-0.374330530518782	0.103276332442554	0.0421623861650503
26	Arsenite	A4	6	140.098137196712	-0.271086239127448	0.088859554837004	0.0362767613535868
31	Arsenite	A4	5	164.310857151248	-0.277056944189282	0.0802782423983219	0.0359015214233707
36	Arsenite	A4	5	188.046713558707	-0.266825564803282	0.06314091962782	0.0282374776899313
41	Arsenite	A4	6	212.477804930892	-0.279383912348615	0.0564105035124446	0.0230294916231613
46	Arsenite	A4	6	237.334704411618	-0.238304775143998	0.101341429196675	0.041372465222707
51	Arsenite	A4	6	262.572918870155	-0.239617528544282	0.088423945676155	0.0360989246583598
1	Arsenite	A5	6	3.66419375354855	0	0.0674449895275683	0.0275343016749829
2	Arsenite	A5	6	7.48822517193056	-0.00738669030988333	0.12013907946379	0.0490465738089943
3	Arsenite	A5	5	11.7156313098455	-0.186525034676887	0.140052112695498	0.0626332088759189
4	Arsenite	A5	5	15.5758301838464	-0.0828818576564655	0.0818472175309898	0.0366031884337012
5	Arsenite	A5	5	19.3094913812278	-0.0101772654613267	0.166320880834649	0.0743809591247834
6	Arsenite	A5	6	23.7198016113934	-0.216016886428933	0.082700928298034	0.0337625125974469
8	Arsenite	A5	6	35.0157393339685	-0.455798336831767	0.0989644678845075	0.0404020748305161
10	Arsenite	A5	6	47.6249398341985	-0.619071120874767	0.149980964677717	0.061229472431799
13	Arsenite	A5	6	67.0632232783984	-0.642428806158433	0.156739777908057	0.0639887463786498
16	Arsenite	A5	5	87.1227128378611	-0.692239505753867	0.0557642665142639	0.0249385381282619
21	Arsenite	A5	6	120.236971457153	-0.584439422258933	0.0783000053287461	0.031965843318772
26	Arsenite	A5	6	153.259549184644	-0.6687480831041	0.10846634404781	0.0442811995303836
31	Arsenite	A5	5	186.933136700243	-0.717164740410067	0.0354705124874059	0.0158628954237189
36	Arsenite	A5	5	220.690334717197	-0.689909092687467	0.101425381395697	0.0453588094889243
41	Arsenite	A5	6	254.698118938669	-0.667368372194267	0.160300642182868	0.0654424631314152
46	Arsenite	A5	6	289.232343552693	-0.6798776777441	0.14035598754975	0.0573000919735527
51	Arsenite	A5	6	322.570253754721	-0.5873305232461	0.145486143794669	0.0593944694903535
1	Arsenite	A6	6	3.70203831809021	0	0.0752117878012657	0.0307050837925975
2	Arsenite	A6	6	7.61461553491364	-0.00146017924095	0.146968014336429	0.0599994406057158
3	Arsenite	A6	5	12.021091950072	-0.192860852275583	0.0453249807097909	0.0202699475891918
4	Arsenite	A6	5	15.5485372693427	0.0764236886812767	0.101874818640613	0.0455598039351749
5	Arsenite	A6	5	19.6661868836343	-0.100658957724685	0.175246899685464	0.0783727961085567
6	Arsenite	A6	6	24.4668815828175	-0.19325150108222	0.158845292410608	0.0648483190748633
8	Arsenite	A6	6	34.1976820317159	-0.23111349547815	0.124568910519678	0.0508550447646043
10	Arsenite	A6	6	43.9792146107753	-0.22613573599515	0.0794073384382015	0.0324179101676811
13	Arsenite	A6	6	58.7780518279792	-0.29772798146565	0.0921865305551936	0.0376349935029525
16	Arsenite	A6	5	73.6231940000769	-0.313420569376383	0.114213180435539	0.051077687076063
21	Arsenite	A6	6	98.7434387715417	-0.254130131219817	0.0731140738233419	0.029848695647228
26	Arsenite	A6	6	123.846509154784	-0.261891305991483	0.0703882541492674	0.0287358844251743
31	Arsenite	A6	5	148.262134319833	-0.330827881555583	0.121823268568987	0.0544810219522937
36	Arsenite	A6	5	173.172421291024	-0.386408633800183	0.127996520657292	0.0572417842146323
41	Arsenite	A6	6	198.854350156226	-0.33447602048565	0.100228136460072	0.0409179653662032
46	Arsenite	A6	6	224.69094181046	-0.33134766217115	0.0553810025846016	0.0226091996293384
51	Arsenite	A6	6	250.764156145534	-0.28991226987215	0.0715982830103841	0.0292298766391372
1	Arsenite	A7	6	3.67401817692848	0	0.0882324945318953	0.0360207650560084
2	Arsenite	A7	6	7.33058216536844	0.0778490123883168	0.056948196515831	0.0232490038725881
3	Arsenite	A7	5	11.5711355607556	-0.0864486316237865	0.13290913809242	0.0594387735211115
4	Arsenite	A7	5	14.8343908523137	0.189903243679113	0.0509623029336033	0.0227910347298948
5	Arsenite	A7	5	18.055718764587	0.214722361237373	0.0749420119704976	0.0335150866273271
6	Arsenite	A7	6	21.6678424706054	0.18584665093905	0.0988794417619294	0.0403673630613288
8	Arsenite	A7	6	29.2270207866703	-0.0120414668124498	0.121789347345368	0.0497202928504563
10	Arsenite	A7	6	38.2513214088663	-0.258955842012167	0.162383640788644	0.0662928437512619
13	Arsenite	A7	6	53.2711274600905	-0.4036924105725	0.0979551762661739	0.0399900332527519
16	Arsenite	A7	5	68.6987933889691	-0.438088662637367	0.115878865046828	0.0518226038800465
21	Arsenite	A7	6	93.8935154376011	-0.348246703761333	0.104628050122072	0.0427142225969034
26	Arsenite	A7	6	118.568257000273	-0.347736079697	0.125922259447099	0.0514075471506252
31	Arsenite	A7	5	143.075888832991	-0.411608257193767	0.169371072715575	0.0757450464028171
36	Arsenite	A7	5	167.346489120125	-0.347041033705566	0.14325257554467	0.0640644993739612
41	Arsenite	A7	6	192.141805049124	-0.355153620355167	0.12673629410644	0.0517398754086796
46	Arsenite	A7	6	216.847434962767	-0.384228174814	0.133265604648647	0.054405455275443
51	Arsenite	A7	6	241.417296469942	-0.3413927013425	0.17180231798141	0.0701380026136396
1	Arsenite	A8	6	3.43947890559255	0	0.0710273938437564	0.0289968121128171
2	Arsenite	A8	6	7.24505370949708	-0.0910510878701333	0.0621103360981747	0.0253564385322158
3	Arsenite	A8	5	11.0959532857972	-0.0866562451406733	0.187580051374123	0.0838883492190882
4	Arsenite	A8	5	14.858388629636	-0.0598277106140333	0.0789625537326959	0.0353131275646575
5	Arsenite	A8	5	18.4460230238326	-0.0408479515793113	0.144340019111982	0.0645508189216022
6	Arsenite	A8	6	23.0421826130196	-0.339566152314233	0.103715709282124	0.0423417610086743
8	Arsenite	A8	6	33.0668141211351	-0.429387863391067	0.126668196859379	0.0517120748239816
10	Arsenite	A8	6	44.0390205077711	-0.535527701469733	0.10167448903061	0.0415084363305333
13	Arsenite	A8	6	63.6984177171236	-0.722139829907733	0.103156427209779	0.0421134350587522
16	Arsenite	A8	5	84.6606974033572	-0.796884385809533	0.128108098950557	0.0572916835443431
21	Arsenite	A8	6	119.555165216376	-0.645263718729233	0.240996850741099	0.0983865523222284
26	Arsenite	A8	6	154.770779400622	-0.7230917849914	0.221869475821107	0.0905778342100805
31	Arsenite	A8	4	190.271854897499	-0.827510176273233	0.0795016568239353	0.0397508284119677
36	Arsenite	A8	5	224.034767956252	-0.700479038806733	0.148207847202458	0.0662805642287195
41	Arsenite	A8	6	253.916880230975	-0.421713689495067	0.123041116931169	0.0502313256439139
46	Arsenite	A8	6	286.934715870879	-0.807497057510233	0.193946237987878	0.0791782201004489
51	Arsenite	A8	6	320.623884157404	-0.6617483945204	0.233419159251151	0.0952929727257945
1	Arsenite	A9	6	3.29322498182189	0	0.0778849574383559	0.0317964007270595
2	Arsenite	A9	6	6.94765081650813	-0.042863602410095	0.122436189850762	0.0499843651974827
3	Arsenite	A9	5	10.5788977504885	-0.0391628925513067	0.0958691211028506	0.0428739743458267
4	Arsenite	A9	5	13.9207942431752	0.0532050881573133	0.136282731133286	0.0609474901946707
5	Arsenite	A9	5	17.2898513537539	0.0251143683303933	0.114392973568868	0.0511580930096651
6	Arsenite	A9	6	21.4258720753155	-0.0643584882158	0.109009185647586	0.0445028136854847
8	Arsenite	A9	6	31.7563877042345	-0.5492128477207	0.209602950152852	0.0855700460760843
10	Arsenite	A9	6	44.0123425305006	-0.573545903105367	0.14947798632668	0.0610241323798479
13	Arsenite	A9	6	63.8960637450979	-0.671349743423033	0.22682646859019	0.0926015180339003
16	Arsenite	A9	5	83.6437771928003	-0.724708164623367	0.19089316278942	0.0853700176874154
21	Arsenite	A9	6	116.376981950288	-0.637377433441033	0.149177061781604	0.0609012804487619
26	Arsenite	A9	6	149.711793837622	-0.740108691752033	0.249698253488223	0.10193888511838
31	Arsenite	A9	5	183.443766630429	-0.812607520404167	0.117615772033543	0.0525993722986242
36	Arsenite	A9	5	216.166063172058	-0.717004126474567	0.162713033148687	0.0727674805891283
41	Arsenite	A9	6	248.202868223534	-0.681350497754367	0.214091605550009	0.0874025319684547
46	Arsenite	A9	6	281.281769623483	-0.825182492260033	0.278257625954374	0.113598200104406
51	Arsenite	A9	6	315.089789487386	-0.754626588829867	0.279293461771566	0.114021078305976
1	Arsenite	B1	6	3.56577769587894	0	0.0822654852491917	0.0335847437171626
2	Arsenite	B1	6	7.93156381289456	-0.173212164316597	0.1355368310796	0.0553326795831363
3	Arsenite	B1	5	12.1679678673842	-0.24131435026938	0.181273539483315	0.0810679913613368
4	Arsenite	B1	5	15.8424287755554	0.03316560291356	0.180315085067834	0.0806393575160667
5	Arsenite	B1	5	20.0297000803911	0.01364843713546	0.226429517881887	0.101262358819281
6	Arsenite	B1	6	24.7482029061721	-0.187112365546313	0.101924481372669	0.0416104952768078
8	Arsenite	B1	6	34.1953618179829	-0.0724591033306467	0.105792822988081	0.0431897391282302
10	Arsenite	B1	6	44.4073950004134	-0.330432762116597	0.169092166279103	0.0690315878142749
13	Arsenite	B1	6	59.9253998064327	-0.341666810757313	0.138604367346697	0.0565849960201144
16	Arsenite	B1	5	77.135262581447	-0.58640580781108	0.118436725909728	0.0529665140333324
21	Arsenite	B1	6	103.75442957025	-0.170472910987147	0.123319911538752	0.0503451430658503
26	Arsenite	B1	6	131.667754041418	-0.59580549961998	0.149816578733058	0.0611623621509158
31	Arsenite	B1	5	162.343454555775	-0.60187559755588	0.17592451961303	0.0786758369527461
36	Arsenite	B1	5	189.836815924073	-0.48735041813388	0.163150724695049	0.0729632221992965
41	Arsenite	B1	6	215.470359115117	-0.382696268568647	0.186964588673055	0.0763279737030541
46	Arsenite	B1	6	242.395821864498	-0.492009357935313	0.127472115296763	0.052040273151716
51	Arsenite	B1	6	269.186420705599	-0.373642411523813	0.231548029753797	0.0945290873072631
1	Arsenite	B10	6	3.30572944485939	0	0.0825978370979419	0.0337204257912474
2	Arsenite	B10	6	6.88233135684468	-0.0417764420291333	0.0395078204574054	0.016129000161689
3	Arsenite	B10	5	10.9001184798292	-0.17373262499831	0.141100804406681	0.063102198066648
4	Arsenite	B10	5	14.3035745628914	-0.01039182349617	0.103326930633986	0.0462092081607998
5	Arsenite	B10	5	18.1861932482131	-0.23097352086175	0.134309284453581	0.0600649380095127
6	Arsenite	B10	6	22.310104675409	-0.14258343619305	0.10409219078685	0.0424954589393698
8	Arsenite	B10	6	31.4944442964226	-0.23611252777355	0.152322746749638	0.0621855009592996
10	Arsenite	B10	6	41.0339542481382	-0.0959007073672167	0.0689299446008617	0.0281405320450706
13	Arsenite	B10	6	55.886524946403	-0.261812159600383	0.0994982637566843	0.0406199960827889
16	Arsenite	B10	5	70.8611561126767	-0.51176379652955	0.15174106969942	0.0678606693652874
21	Arsenite	B10	6	99.3279013944951	-0.639523737677217	0.319309189954504	0.130357430928327
26	Arsenite	B10	6	131.817918432053	-0.74692788076155	0.214524252203087	0.0875791592249489
31	Arsenite	B10	4	164.504173309835	-0.8042807289758	0.163034745765648	0.0815173728828239
36	Arsenite	B10	5	196.915129448962	-0.67889602440195	0.212242551209523	0.0949177544444948
41	Arsenite	B10	5	230.584234724496	-0.67764126430535	0.151958883181558	0.0679580785157826
46	Arsenite	B10	6	265.054423284384	-0.91173924997255	0.269949330732735	0.110206352783503
51	Arsenite	B10	6	299.45147236106	-0.792512467770717	0.264435195773067	0.107955216612832
1	Arsenite	B11	6	3.19427999012478	0	0.08814161894481	0.0359836652529359
2	Arsenite	B11	6	6.3077050431196	0.0368923742562673	0.0792722610081735	0.032362765037792
3	Arsenite	B11	5	9.80732744749275	-0.031179220139416	0.0598992705108924	0.0267877681330008
4	Arsenite	B11	5	12.7576954275901	0.10848418533587	0.0701385722026221	0.031366923057968
5	Arsenite	B11	5	15.6551275418285	0.055409350761504	0.0583383079889492	0.0260896844711219
6	Arsenite	B11	6	19.3209745608722	0.068692238017004	0.0455347976668043	0.0185895033040908
8	Arsenite	B11	6	27.717167524093	-0.251677787861266	0.216821298783997	0.0885169245647212
10	Arsenite	B11	6	36.9470329461791	-0.151052847000333	0.161631876442255	0.0659859372420168
13	Arsenite	B11	6	51.8786558178	-0.356792005639849	0.148669938814099	0.0606942483642229
16	Arsenite	B11	5	67.2023427301017	-0.591913971617816	0.179099524430483	0.0800957422728887
21	Arsenite	B11	6	94.6782872548152	-0.536566813191349	0.300369592304059	0.12262537256546
26	Arsenite	B11	6	126.291988705215	-0.789812537231516	0.37123872549058	0.151557575035513
31	Arsenite	B11	5	159.672416023636	-0.761268824113816	0.166380212318216	0.0744074929708757
36	Arsenite	B11	5	192.698684059236	-0.680769911207016	0.154978109227669	0.0693083174514909
41	Arsenite	B11	6	225.582576964534	-0.713576885497849	0.328545857423723	0.134128284632219
46	Arsenite	B11	6	252.377339904775	-0.412021420279883	0.291190245934434	0.118877920102484
51	Arsenite	B11	6	275.357453875665	-0.370028381285683	0.266804285185774	0.108922393315525
1	Arsenite	B12	6	2.68439244066467	0	0.0467971996485309	0.0191048767550088
2	Arsenite	B12	6	6.5631036948371	-0.2853418836249	0.259650086146574	0.106001703788133
3	Arsenite	B12	5	10.739884268754	-0.313967822625203	0.198656136529193	0.0888417250853509
4	Arsenite	B12	5	13.9624001433555	-0.130168121761663	0.187989474546324	0.0840714488280094
5	Arsenite	B12	5	17.2841497489061	-0.288679953729683	0.147694011070607	0.0660507697246967
6	Arsenite	B12	6	21.257153122043	-0.243994697159617	0.11446389661698	0.0467296901137146
8	Arsenite	B12	6	30.1902004480249	-0.554184799294783	0.26889227779339	0.109774812728086
10	Arsenite	B12	6	39.4586288631757	-0.39640286862745	0.163795506563734	0.0668692355403069
13	Arsenite	B12	6	53.1406440926226	-0.46110372618345	0.229159710439316	0.0935540600300446
16	Arsenite	B12	5	66.5063314957038	-0.724905211164583	0.266182016209814	0.119040216526619
21	Arsenite	B12	6	89.1314951173292	-0.462564465706783	0.294941820577933	0.120409494037241
26	Arsenite	B12	6	111.806489089438	-0.54718427486045	0.30220972253764	0.12337660258755
31	Arsenite	B12	5	134.226024781673	-0.562989095300383	0.271325410725067	0.12134041248086
36	Arsenite	B12	5	156.685899329528	-0.495565694203183	0.173478276657888	0.0775818438453104
41	Arsenite	B12	6	179.341415485197	-0.519069410244783	0.293665986440775	0.11988863693183
46	Arsenite	B12	6	201.884825914539	-0.68968637112695	0.367341079015245	0.149966367525125
51	Arsenite	B12	6	224.472103974011	-0.496726967905783	0.316039359085578	0.129022528065982
1	Arsenite	B2	6	3.49840929114481	0	0.0580133932542274	0.0236838686200461
2	Arsenite	B2	6	7.78348329186713	-0.194991866514358	0.1026100702362	0.0418903857583055
3	Arsenite	B2	5	11.9733360511644	-0.218810950151808	0.0755314957335952	0.0337787117805108
4	Arsenite	B2	5	16.0640984290186	-0.106021697590848	0.0800350074578589	0.035792743451095
5	Arsenite	B2	5	19.6112675204486	0.0318814458573117	0.0797488877709973	0.0356647868371903
6	Arsenite	B2	6	24.1560297760704	-0.187381750514642	0.0867708188684271	0.0354240384651849
8	Arsenite	B2	6	33.3934992576282	-0.133851030429425	0.0992537744995799	0.0405201837615392
10	Arsenite	B2	6	42.7851052170484	-0.204765117931608	0.0964689826531329	0.0393832972509296
13	Arsenite	B2	6	56.9231054220466	-0.245798365428608	0.0761084955003483	0.0310711631777938
16	Arsenite	B2	4	74.3748421757866	-0.613177024314608	0.119646529854266	0.0598232649271332
21	Arsenite	B2	6	106.483079539878	-0.554845666407275	0.110664232667538	0.0451784838020174
26	Arsenite	B2	6	136.36780412766	-0.534983768347108	0.154170449649501	0.062939822509454
31	Arsenite	B2	5	167.451016088409	-0.649344751197608	0.126997109481063	0.0567948339491282
36	Arsenite	B2	5	199.394790221995	-0.667659561535008	0.151350032254227	0.0676857921034473
41	Arsenite	B2	6	231.121124101316	-0.578860928613442	0.148064248257833	0.0604469762300774
46	Arsenite	B2	6	263.405385870865	-0.587345106898775	0.174727728085114	0.0713322962873826
51	Arsenite	B2	6	294.732389990579	-0.470942838021775	0.179314167316578	0.0732047022629442
1	Arsenite	B3	6	3.58808053016889	0	0.0613160568379792	0.0250321753820901
2	Arsenite	B3	6	7.79266767921318	-0.145224668905715	0.0633352352203063	0.0258565015048167
3	Arsenite	B3	5	12.168823369589	-0.263286044246948	0.0806908866565038	0.0360860615457346
4	Arsenite	B3	5	15.9600923568082	-0.0433499441931878	0.114905950223481	0.0513875031437822
5	Arsenite	B3	5	19.7131585515189	-0.0624876603491278	0.0504134006618275	0.0225455581713559
6	Arsenite	B3	6	23.8340152313739	-0.0726087743824762	0.08835452321331	0.0360705830565835
8	Arsenite	B3	6	33.0271213797523	-0.241627742325915	0.074017791020408	0.030217636647993
10	Arsenite	B3	6	43.0300494234681	-0.338715994606081	0.0659167645112459	0.0269104064246252
13	Arsenite	B3	6	61.9910305073491	-0.635879806980581	0.124026808638115	0.0506337325981992
16	Arsenite	B3	5	81.3276909511969	-0.560621160431148	0.118210900100046	0.0528655216610277
21	Arsenite	B3	6	108.413457509835	-0.247132132866948	0.0949331666754555	0.0387563030035757
26	Arsenite	B3	6	132.685703424575	-0.260572012241081	0.0676509644695461	0.0276183905929237
31	Arsenite	B3	5	156.614933517907	-0.260598555702948	0.0482670330388056	0.0215856733893995
36	Arsenite	B3	5	179.923661913103	-0.246565161407148	0.0970870047878886	0.0434186284875133
41	Arsenite	B3	6	203.595986093904	-0.227070520541248	0.0640365653988382	0.026142818351253
46	Arsenite	B3	6	227.645685578711	-0.249491514172415	0.0538428285578911	0.0219812427124979
51	Arsenite	B3	6	251.959304818127	-0.225026104292415	0.0834900454097524	0.0340846683092817
1	Arsenite	B4	6	3.96118533934672	0	0.0928262413069556	0.0378961543237506
2	Arsenite	B4	6	8.09837443395686	-0.06715750241065	0.0931856823997819	0.0380428955354195
3	Arsenite	B4	5	13.4056143694122	-0.35306336458525	0.12678933797111	0.0567019157051194
4	Arsenite	B4	5	17.4016078713336	0.023244430263888	0.0571634815070378	0.0255642860960577
5	Arsenite	B4	5	21.1878611877261	-0.00258584410307	0.103900715108001	0.0464658123784658
6	Arsenite	B4	6	25.4543099922613	-0.0549636374718	0.0650821853636094	0.0265696909143458
8	Arsenite	B4	6	35.4368940685826	-0.287359169614017	0.109790686281762	0.0448218599833836
10	Arsenite	B4	6	46.6793126006226	-0.30613727235235	0.162565994583055	0.0663672893760898
13	Arsenite	B4	4	65.6111129422067	-0.48288792868585	0.132852966348432	0.0664264831742159
16	Arsenite	B4	5	82.6725369092819	-0.30622771777085	0.148413011606579	0.0663723165395551
21	Arsenite	B4	5	113.122397252847	-0.49790725029145	0.185356564311385	0.0828939755752138
26	Arsenite	B4	4	146.727352343743	-0.44921288393585	0.245959991023526	0.122979995511763
31	Arsenite	B4	3	181.69128282045	-0.565321382805183	0.0950633327235748	0.0548848407380189
36	Arsenite	B4	5	210.440470608215	-0.25013834801645	0.0774814375580707	0.0346507522748503
41	Arsenite	B4	6	235.26368114181	-0.217019864347183	0.0734454873654873	0.0299839946592454
46	Arsenite	B4	6	260.493248390506	-0.190141060237017	0.0742960352823113	0.0303312293922465
51	Arsenite	B4	6	285.931134350918	-0.17260154986885	0.087291900717342	0.0356367692391961
1	Arsenite	B5	6	3.92225914420711	0	0.0432969310300635	0.0176758980753552
2	Arsenite	B5	6	8.39872452197954	-0.12401096312829	0.0874312543256382	0.035693660111553
3	Arsenite	B5	5	13.018658573211	-0.237219965672123	0.115062150110282	0.051457357856775
4	Arsenite	B5	5	16.9680594355819	0.0131692440956767	0.0754411884916403	0.0337383251541365
5	Arsenite	B5	5	20.8530923471515	-0.0352462354669613	0.0794451231988102	0.035528939190677
6	Arsenite	B5	6	25.6753497709237	-0.20495346790584	0.126704733680727	0.0517269909188359
8	Arsenite	B5	6	36.2834270545666	-0.329101109885623	0.048954029684657	0.0199853989300784
10	Arsenite	B5	6	47.5932049128483	-0.45446431829729	0.119482100034779	0.0487783630802306
13	Arsenite	B5	6	64.2387490478698	-0.316976853010707	0.24293332765359	0.0991771157112756
16	Arsenite	B5	5	78.1888779031847	-0.169898544249523	0.0656597112920392	0.029363915566402
21	Arsenite	B5	4	107.13142761685	-0.556885714190873	0.144704038291568	0.072352019145784
26	Arsenite	B5	6	138.780732106214	-0.431306372429623	0.158507548599227	0.0647104357412523
31	Arsenite	B5	5	168.094850099497	-0.499673523618323	0.125018615364204	0.0559100244814521
36	Arsenite	B5	4	199.383760097939	-0.543463160862873	0.0931781134551301	0.0465890567275651
41	Arsenite	B5	4	232.751441204392	-0.618881753543373	0.10557415515637	0.052787077578185
46	Arsenite	B5	5	265.828876916854	-0.497026265678923	0.243929968565795	0.109088798292501
51	Arsenite	B5	3	298.291512310657	-0.36970555174379	0.238616411496692	0.137765249410678
1	Arsenite	B6	6	3.99570235867178	0	0.0711079153900752	0.0290296848964472
2	Arsenite	B6	6	8.1414911754819	-0.018106344927075	0.0628262217998918	0.0256486976461093
3	Arsenite	B6	5	12.7107963647987	-0.108181470217258	0.019477391632685	0.00871055434301384
4	Arsenite	B6	5	16.6015145958049	0.0670219685951117	0.0472805131917528	0.021144488301567
5	Arsenite	B6	5	20.5691296848566	-0.00688310281897835	0.0494580879322637	0.0221183293307407
6	Arsenite	B6	6	25.2772932953812	0.019853582565775	0.0704015452188035	0.0287413104815909
8	Arsenite	B6	6	34.6358725049205	0.00271980146057499	0.103358363870612	0.0421958753553194
10	Arsenite	B6	6	44.0031243909365	-0.129164415500692	0.0943712430706095	0.038526898652526
13	Arsenite	B6	6	59.1540432706226	-0.365445517405458	0.0883891966854037	0.0360847384422902
16	Arsenite	B6	5	74.5506142199288	-0.385204458338058	0.0798097864874686	0.0356920215711448
21	Arsenite	B6	6	100.334364491515	-0.354448597330625	0.0688181131789446	0.0280948770582528
26	Arsenite	B6	6	126.245087429709	-0.352237536066458	0.0408200147785309	0.0166647012500449
31	Arsenite	B6	5	151.888759114407	-0.377649767435458	0.0860448866909052	0.0384804431514262
36	Arsenite	B6	5	177.054664526804	-0.390290835000458	0.0622773531952698	0.0278512790406774
41	Arsenite	B6	6	202.632961397781	-0.355960888790292	0.0709939017595995	0.0289831390267159
46	Arsenite	B6	6	228.450996698568	-0.370678418687958	0.0675223197596795	0.0275658716100435
51	Arsenite	B6	6	254.264697807761	-0.347402760346292	0.0770686778158737	0.0314631559666407
1	Arsenite	B7	6	3.90278082482254	0	0.0258694293874284	0.0105611503226933
2	Arsenite	B7	6	7.96066036116864	-0.0461480075763317	0.0841291640025768	0.034345587382206
3	Arsenite	B7	5	12.0521833130985	-0.058280331485575	0.103989657616505	0.0465055886774869
4	Arsenite	B7	5	15.9675110849099	-0.021322929687855	0.0276998755171205	0.0123877609249127
5	Arsenite	B7	5	20.1258606754474	-0.087303443864495	0.0522487934981502	0.0233663708008426
6	Arsenite	B7	6	24.9151384952684	-0.090122627693905	0.106994212591707	0.0436802043800913
8	Arsenite	B7	4	36.6275044897837	-0.433013887575805	0.103365491207611	0.0516827456038055
10	Arsenite	B7	4	48.7016269068017	-0.537938057166305	0.189987550773561	0.0949937753867803
13	Arsenite	B7	2	68.9049462645304	-0.630811988184555	0.153525461854339	0.108558895162
16	Arsenite	B7	4	89.5873094660221	-0.676866648315305	0.0494194396511684	0.0247097198255842
21	Arsenite	B7	4	124.83469266073	-0.669273003731055	0.157814072321804	0.0789070361609022
26	Arsenite	B7	5	159.575138472572	-0.602433826229555	0.150817866298674	0.0674478002530619
31	Arsenite	B7	5	193.212168070724	-0.568737322986155	0.102869550012616	0.0460046613286049
36	Arsenite	B7	3	227.224169309367	-0.627778557077888	0.05534589999458	0.0319539702604129
41	Arsenite	B7	2	258.537705075741	-0.469063535921055	0.394823911258527	0.2791826650255
46	Arsenite	B7	6	286.26453104109	-0.337610138086222	0.0913982519313649	0.0373131801023652
51	Arsenite	B7	6	312.714641505915	-0.254308996338555	0.116229146769522	0.0474503504707306
1	Arsenite	B8	6	3.85557830669757	0	0.0484146994722509	0.0197652182928681
2	Arsenite	B8	6	7.63296044954449	0.031156268265325	0.0404377661892164	0.016508648916925
3	Arsenite	B8	5	11.8165261920023	-0.10270756444791	0.117573222225021	0.052580343445767
4	Arsenite	B8	5	15.4359116344339	0.0705082585668117	0.0549024218134445	0.0245531094608458
5	Arsenite	B8	5	19.1242688953582	0.0180658864039317	0.0278606018048847	0.0124596399059551
6	Arsenite	B8	6	23.5048078130871	-0.088160312960955	0.0758333827868668	0.0309588488828301
8	Arsenite	B8	6	33.3683975427767	-0.290865606976155	0.0981631664062217	0.0400749448718597
10	Arsenite	B8	6	44.2606319203231	-0.376132156699322	0.139605186214223	0.0569935786118456
13	Arsenite	B8	6	61.1455436839084	-0.218325305029488	0.0684074864487372	0.0279272393976269
16	Arsenite	B8	5	78.1102133540489	-0.359158012308688	0.133454507280623	0.0596826700366429
21	Arsenite	B8	4	109.403970590759	-0.454987697658738	0.151356091024211	0.0756780455121057
26	Arsenite	B8	5	142.17954040252	-0.393232657641288	0.145306783841588	0.0649831692523317
31	Arsenite	B8	5	175.561703160412	-0.530813717337088	0.195662248311557	0.087502817571017
36	Arsenite	B8	5	208.831119614979	-0.470946962847688	0.119265348261542	0.0533370852145987
41	Arsenite	B8	4	242.281223041484	-0.583161712126238	0.0982735639629368	0.0491367819814684
46	Arsenite	B8	6	276.742412566383	-0.654482465351488	0.264051257178259	0.107798474337858
51	Arsenite	B8	6	310.326599472925	-0.558896650441155	0.15913190057324	0.0649653263672906
1	Arsenite	B9	6	3.75575691277443	0	0.126970936968159	0.0518356679558458
2	Arsenite	B9	6	7.83649966977869	-0.0526603236316167	0.143957717776795	0.058770492181456
3	Arsenite	B9	5	13.6814916687885	-0.398647843189317	0.180276153478226	0.0806219467798996
4	Arsenite	B9	5	16.9947905412348	0.207793522694303	0.0969484805557933	0.0433566785676141
5	Arsenite	B9	5	20.4873784507993	0.0399626152691233	0.101913669671767	0.0455771786445058
6	Arsenite	B9	6	24.4530313272594	0.0880032661840683	0.219172665820961	0.0894768661378148
8	Arsenite	B9	6	33.6165880514654	-0.271004007168983	0.283458863599936	0.115721596481503
10	Arsenite	B9	6	44.734284057503	-0.365476055634717	0.221195222125779	0.0903025712916239
13	Arsenite	B9	6	60.9026417254841	-0.337309701843383	0.156793696062016	0.0640107583728287
16	Arsenite	B9	5	75.758050183208	-0.397310035521317	0.13837321366956	0.0618823824060481
21	Arsenite	B9	6	100.43226702623	-0.254620611340883	0.201050124639074	0.0820783696814488
26	Arsenite	B9	6	125.539862196207	-0.337012208072217	0.189663316471876	0.0774297247133502
31	Arsenite	B9	5	150.666744898621	-0.378200811758117	0.163141627116582	0.07295915363852
36	Arsenite	B9	5	175.283165699305	-0.289532145522917	0.119527900382838	0.0534545020927696
41	Arsenite	B9	6	200.266639936451	-0.33532544389505	0.165607011011649	0.0676087791343358
46	Arsenite	B9	6	225.107837705405	-0.42191398459955	0.221582997468234	0.0904608799122649
51	Arsenite	B9	6	249.711729722123	-0.339484208942383	0.202294425971047	0.0825863535730486
1	Arsenite	C1	6	3.71007380209182	0	0.0940851351139706	0.0384100955683401
2	Arsenite	C1	6	7.49400780019297	0.019662799994296	0.142427387729939	0.0581457375559813
3	Arsenite	C1	5	11.7393890123743	-0.196321505423786	0.0427209225177812	0.0191053773622521
4	Arsenite	C1	5	15.4977768472303	0.0543828961165823	0.120532454587481	0.0539037523905026
5	Arsenite	C1	5	19.8973255468117	-0.124929139522586	0.129639203754962	0.0579764144290082
6	Arsenite	C1	6	24.5417931395158	-0.180593513793419	0.191651389869561	0.0782413522792716
8	Arsenite	C1	6	35.2131870927843	-0.400002407367852	0.0704952816709529	0.028779578227935
10	Arsenite	C1	6	46.0956307823354	-0.352445730995019	0.14040492480144	0.0573200705228951
13	Arsenite	C1	6	62.7715777216618	-0.421453489868519	0.172834069447649	0.0705592133859154
16	Arsenite	C1	5	78.0920106418648	-0.218384034746386	0.129907556167665	0.0580964252763543
21	Arsenite	C1	6	102.660808188948	-0.150279375316936	0.0785245257324033	0.0320575033897393
26	Arsenite	C1	6	126.805631174368	-0.192056868605319	0.164624438596393	0.0672076456255506
31	Arsenite	C1	5	150.36749701057	-0.161925922844766	0.118197933520427	0.052859722830335
36	Arsenite	C1	5	174.590381483053	-0.251875230714286	0.156904060209748	0.0701696289149434
41	Arsenite	C1	6	199.14384426067	-0.154392201815069	0.10021397866219	0.0409121854694212
46	Arsenite	C1	6	223.361544658696	-0.160296056175036	0.0851378296419934	0.0347573734051474
51	Arsenite	C1	6	247.772064651489	-0.135230650076552	0.160509389807106	0.065527683992149
1	Arsenite	C10	6	3.81303335426698	0	0.193478427956503	0.0789872374548779
2	Arsenite	C10	6	7.53832580945039	-0.00935025264185001	0.0791739896004953	0.0323226459036059
3	Arsenite	C10	5	11.8086159284248	-0.16041083573997	0.120036489207821	0.0536819499298217
4	Arsenite	C10	5	15.978651843604	-0.13447698644643	0.179542541418286	0.0802938654928719
5	Arsenite	C10	5	20.6094764503045	-0.33452016167615	0.129919732411818	0.0581018706582816
6	Arsenite	C10	6	25.8979063249419	-0.260090770921517	0.155487744827997	0.0634776060141111
8	Arsenite	C10	6	36.9402187522969	-0.451080426989517	0.299315902822367	0.122195205635879
10	Arsenite	C10	6	48.3608885286544	-0.387824566374017	0.136190607380981	0.0555995826405208
13	Arsenite	C10	6	67.9148902686557	-0.572060330697017	0.187106339585647	0.0763858432707912
16	Arsenite	C10	5	88.89532249972	-0.82764486576115	0.211246424438817	0.0944722730097934
21	Arsenite	C10	2	123.132773995457	-0.96903217874885	0.22716429735967	0.1606294151065
26	Arsenite	C10	6	156.053833213595	-0.67068426587385	0.249734357146814	0.101953624375278
31	Arsenite	C10	5	190.108826982414	-0.82262111828155	0.259007805974989	0.11583181217263
36	Arsenite	C10	5	224.660117936884	-0.76179510291795	0.200095940417584	0.0894856249590931
41	Arsenite	C10	6	256.762411381373	-0.52524612666935	0.234494296942834	0.0957318958504375
46	Arsenite	C10	6	287.867997752654	-0.79151889405785	0.265323974825709	0.108318059141673
51	Arsenite	C10	6	321.700945007516	-0.80960000972935	0.30454050992171	0.124328142552531
1	Arsenite	C11	6	3.18908968417874	0	0.0800241984218368	0.0326697422014558
2	Arsenite	C11	6	6.37824496863696	0.0343191884695958	0.062473609783268	0.0255047443931256
3	Arsenite	C11	5	10.6997046672144	-0.298295404433838	0.211958271209891	0.0947906205637304
4	Arsenite	C11	5	14.1213272997156	-0.0678182764580775	0.219593726683999	0.0982053000595862
5	Arsenite	C11	5	17.8554068771282	-0.279314816140837	0.250310702614263	0.111942349308245
6	Arsenite	C11	6	21.9980595418609	-0.0649266229442708	0.121900846771916	0.049765812300732
8	Arsenite	C11	6	30.8321609957188	-0.395052129418004	0.357991223864067	0.146149305143571
10	Arsenite	C11	6	39.9134091622889	-0.255603982055338	0.209807568053745	0.0856535809843219
13	Arsenite	C11	0	54.3235225262877	NA	NA	NA
16	Arsenite	C11	5	69.8678365580661	-0.813033905904837	0.320014677483988	0.143114914530374
21	Arsenite	C11	6	100.4266980586	-0.708197797729004	0.395720834835995	0.161552354322728
26	Arsenite	C11	6	134.311216590996	-0.841946744535671	0.450156482678175	0.18377561449459
31	Arsenite	C11	5	166.313430719621	-0.725267738841238	0.227491231108602	0.10173717140879
36	Arsenite	C11	5	199.016378635636	-0.754137743117838	0.17554418007368	0.0785057439398426
41	Arsenite	C11	6	232.771906671819	-0.721389007132504	0.312726699734842	0.127670140549155
46	Arsenite	C11	6	266.586727486681	-0.938240000444337	0.467795122569455	0.190976559076313
51	Arsenite	C11	6	299.205810755597	-0.759847411010671	0.438534415471288	0.179030925425723
1	Arsenite	C12	6	2.72849958036916	0	0.174942430301906	0.0714199481003468
2	Arsenite	C12	6	6.08440270343851	-0.132094493929267	0.19195278106669	0.0783643947202605
3	Arsenite	C12	5	9.79912352974822	-0.212806309534837	0.106643459605022	0.0476924050065166
4	Arsenite	C12	4	12.7971747196962	0.141058994941633	0.0830393144132132	0.0415196572066066
5	Arsenite	C12	5	15.532775125908	-0.0981404072254767	0.213524372215296	0.095491002225274
6	Arsenite	C12	6	18.9728402721821	0.0138214212765167	0.118505730061051	0.0483797617075963
8	Arsenite	C12	6	26.1912661534366	-0.377757985068333	0.268259094985679	0.109516316929287
10	Arsenite	C12	6	34.2305966153637	-0.28435387671785	0.17186677485866	0.0701643170235856
13	Arsenite	C12	6	47.0348883004182	-0.41939814916335	0.269412836427011	0.109987329900347
16	Arsenite	C12	5	59.1767799271017	-0.636283152111317	0.235275563735269	0.105218430791329
21	Arsenite	C12	6	80.0901355360641	-0.418886504379683	0.299428649977944	0.122241234469398
26	Arsenite	C12	6	99.5618704734693	-0.3160178049299	0.353306467778823	0.14423676148053
31	Arsenite	C12	5	118.01882210615	-0.436663678502117	0.283645800540602	0.126850258308227
36	Arsenite	C12	5	136.993055752948	-0.388540240866517	0.324742893712106	0.145229437110051
41	Arsenite	C12	6	157.577731748845	-0.506285175351467	0.395170367902352	0.161327627138111
46	Arsenite	C12	6	179.20901609418	-0.62904480327715	0.362307276884692	0.147911326410793
51	Arsenite	C12	6	201.378153885218	-0.564310398350683	0.37238754676913	0.152026579358529
1	Arsenite	C2	5	3.6488641869456	0	0.0892019964727485	0.0398923455683524
2	Arsenite	C2	6	7.87054573473326	-0.123078633994037	0.0588351630524938	0.0240193547353432
3	Arsenite	C2	5	12.6217369294333	-0.32544798956067	0.0453238605905558	0.0202694466566413
4	Arsenite	C2	5	16.7608831878658	-0.06581325138599	0.104400887528301	0.046689496284918
5	Arsenite	C2	5	20.5140412724197	-0.04899285659033	0.14310295804554	0.0639975883942257
6	Arsenite	C2	6	24.5523289502791	0.0415103107269183	0.089863904434897	0.0366867853599547
8	Arsenite	C2	6	33.0566104165934	-0.158986199897403	0.0878029429914091	0.0358454013739388
10	Arsenite	C2	6	43.8156408977089	-0.459896014293737	0.15241816460945	0.0622244551374474
13	Arsenite	C2	5	62.8177115741678	-0.51027944406127	0.193996977474763	0.0867580858126133
16	Arsenite	C2	4	83.2568923084786	-0.65660430591182	0.12882933959281	0.0644146697964049
21	Arsenite	C2	6	115.391248243069	-0.476978622758737	0.208158810494959	0.0849804785295584
26	Arsenite	C2	6	141.961222152739	-0.193515312721487	0.138609274592145	0.0565869993946793
31	Arsenite	C2	5	165.401774070539	-0.20752258915087	0.102350400068101	0.0457724904153148
36	Arsenite	C2	5	188.220441409091	-0.20668032915033	0.165349245693208	0.0739464306796656
41	Arsenite	C2	6	211.511256063841	-0.15761483628667	0.116434447818097	0.0475341642728421
46	Arsenite	C2	6	235.12080012933	-0.199691454376903	0.0786873620051426	0.0321239810197106
51	Arsenite	C2	6	258.803025243566	-0.177361348785903	0.097738146915187	0.039901431391231
1	Arsenite	C3	6	4.11855154382091	0	0.0725445733528148	0.029616198053717
2	Arsenite	C3	6	8.81289425778059	-0.138351194411917	0.117911899901278	0.048137331560043
3	Arsenite	C3	5	13.7018670844597	-0.18835313051647	0.117230402439391	0.052427029776827
4	Arsenite	C3	5	17.663933368716	0.00230272526377001	0.0622875738743773	0.0278558498673295
5	Arsenite	C3	5	21.5244559626215	0.02321824331111	0.0308430426164823	0.0137934279846755
6	Arsenite	C3	6	26.480670635901	-0.15993308260875	0.124603111081126	0.0508690070853483
8	Arsenite	C3	6	36.7280490669246	-0.204238714708533	0.125884726003473	0.0513922241864295
10	Arsenite	C3	4	48.6332987644994	-0.36655458238625	0.20173413994323	0.100867069971615
13	Arsenite	C3	2	68.9642388634988	-0.53028447253175	0.0341272496333671	0.024131609639
16	Arsenite	C3	3	89.213054822343	-0.478165287075417	0.0510623857266373	0.0294808821447386
21	Arsenite	C3	5	121.366750334656	-0.39987633749975	0.185604203332729	0.0830047231123351
26	Arsenite	C3	6	149.256286566482	-0.206048605569417	0.0939886893242849	0.0383707217395784
31	Arsenite	C3	5	174.411473973282	-0.28757987737235	0.0461471691964544	0.0206376414584913
36	Arsenite	C3	5	198.740454212514	-0.26820742813715	0.0926910285348907	0.0414526881416777
41	Arsenite	C3	6	223.430655000324	-0.212249012640583	0.117569785625122	0.0479976639916589
46	Arsenite	C3	6	248.788707619746	-0.260609583644917	0.0931756981190244	0.0380388194698687
51	Arsenite	C3	6	274.53948167335	-0.217077274800417	0.12039414709713	0.0491507047342582
1	Arsenite	C4	6	4.18665656578657	0	0.0465827299082157	0.0190173198501689
2	Arsenite	C4	6	9.221012583731	-0.142191711077567	0.107543656962298	0.0439045141050904
3	Arsenite	C4	5	14.9389846053875	-0.393078809019433	0.0563861165932211	0.0252166379379342
4	Arsenite	C4	5	20.6144290307292	-0.376637582762033	0.0363438474078206	0.0162534626735533
5	Arsenite	C4	5	26.7894646035084	-0.492527048854033	0.125205327558677	0.0559935247132658
6	Arsenite	C4	5	32.7714881885892	-0.481600500881033	0.149535763113385	0.0668744262777669
8	Arsenite	C4	5	45.9857683219777	-0.566534329572633	0.20665487208467	0.0924188683725691
10	Arsenite	C4	6	59.3383492633663	-0.519080362954733	0.119866782403697	0.0489354089997132
13	Arsenite	C4	4	79.1554617493819	-0.617183373698233	0.168940903375569	0.0844704516877844
16	Arsenite	C4	5	98.5043609864133	-0.548744114767233	0.129527313723428	0.0579263756857054
21	Arsenite	C4	5	132.03719062137	-0.538202893055433	0.189053059763393	0.0845470985970554
26	Arsenite	C4	2	167.960883536845	-0.583352436318733	0.10529174828244	0.0744525092135
31	Arsenite	C4	3	204.788913873084	-0.674654661151567	0.158415111465045	0.0914610072480486
36	Arsenite	C4	4	241.728868584362	-0.672760886600233	0.175434226735659	0.0877171133678297
41	Arsenite	C4	3	280.546801457829	-0.852351893494233	0.213700241592202	0.123379892009146
46	Arsenite	C4	4	318.772212947262	-0.597163448361733	0.21402976015533	0.107014880077665
51	Arsenite	C4	5	354.182944888814	-0.582255826464233	0.142013031375663	0.0635101583693586
1	Arsenite	C5	6	4.09319041966161	0	0.0558934148735453	0.0228183910703123
2	Arsenite	C5	6	8.63499825573607	-0.062871144114005	0.090200329020438	0.0368241301218718
3	Arsenite	C5	5	13.4829343384823	-0.199882211268955	0.0768388782401188	0.034363391011947
4	Arsenite	C5	5	17.9433734415836	-0.058933175164069	0.0905553248273292	0.0404975724076965
5	Arsenite	C5	5	22.2135710015957	-0.068648041533795	0.0689041144674314	0.0308148567757207
6	Arsenite	C5	6	27.5868720606614	-0.207185114694988	0.122341474559724	0.0499456978418355
8	Arsenite	C5	6	38.2443442042784	-0.244228162536055	0.101665506658542	0.0415047692924923
10	Arsenite	C5	6	48.895109643151	-0.120899406744338	0.0898419620537022	0.0366778274203432
13	Arsenite	C5	6	64.666715329588	-0.0825382482690217	0.0876122986930035	0.035767571165028
16	Arsenite	C5	5	80.3222307652723	-0.179597437728155	0.0485772345489719	0.0217243997220905
21	Arsenite	C5	6	107.020645263042	-0.173060301068555	0.0732513207011372	0.0299047264504594
26	Arsenite	C5	6	136.285285548809	-0.332388948543555	0.0921067939887063	0.0376024411859966
31	Arsenite	C5	5	164.926733332907	-0.263073725808555	0.0344730879714147	0.0154168336196827
36	Arsenite	C5	5	191.62559354017	-0.276730246879355	0.0494561098846546	0.0221174447209574
41	Arsenite	C5	6	219.534949468838	-0.324542536402722	0.104790671696908	0.0427806125768224
46	Arsenite	C5	6	249.341825920086	-0.384818249696722	0.136626259332474	0.0557774368049548
51	Arsenite	C5	6	278.744712161542	-0.302003666422222	0.109939170643812	0.0448824784703511
1	Arsenite	C6	6	4.44556864889008	0	0.0890374315761025	0.036349379228237
2	Arsenite	C6	6	9.12742038341048	-0.0235764668417167	0.0743347130618721	0.0303470195296311
3	Arsenite	C6	5	13.675816266227	-0.01113920295709	0.101276700859842	0.0452923175319035
4	Arsenite	C6	5	17.6602234075034	0.171121006054089	0.0139691635143581	0.00624719984138293
5	Arsenite	C6	5	21.9680575930443	0.02195256311449	0.074579374105389	0.0333529100438075
6	Arsenite	C6	4	27.0296910471455	-0.00837358356614998	0.123039971943126	0.061519985971563
8	Arsenite	C6	6	36.939484969261	-0.05764671209965	0.0989105746941565	0.0403800730276876
10	Arsenite	C6	6	48.1914404272805	-0.109706085563217	0.0506122016747128	0.0206623448103137
13	Arsenite	C6	2	66.9678413241761	-0.34625909695005	0.18886954095589	0.1335509331695
16	Arsenite	C6	4	83.51415422192	-0.26293393373255	0.0580603018639062	0.0290301509319531
21	Arsenite	C6	5	113.363826022956	-0.40283200256475	0.143936329260298	0.0643702833315638
26	Arsenite	C6	6	143.336485561892	-0.299913043610883	0.156103949001225	0.063729170314408
31	Arsenite	C6	5	171.194837903483	-0.31645349969535	0.111556361646446	0.0498895215928006
36	Arsenite	C6	5	198.029269620967	-0.27307542200895	0.104926956284836	0.0469247613850086
41	Arsenite	C6	6	225.398219107149	-0.343065363300217	0.126236463009406	0.0515358202177949
46	Arsenite	C6	6	253.586733332364	-0.363388277040383	0.176291102792629	0.0719705413390801
51	Arsenite	C6	6	281.989479058773	-0.315776944559217	0.154914323686116	0.0632435078132223
1	Arsenite	C7	6	4.31659504112409	0	0.0844294968753233	0.0344681977640748
2	Arsenite	C7	6	8.89125706995142	-0.0573912305397	0.100342243393142	0.0409645493265591
3	Arsenite	C7	5	13.6644238113899	-0.0985143067184433	0.083039437450655	0.0371363653906013
4	Arsenite	C7	5	17.7255097559154	0.0599632649961767	0.0557233210106279	0.0249202267423612
5	Arsenite	C7	5	22.189721426617	-0.0809618643026233	0.09395188595096	0.0420165607201308
6	Arsenite	C7	5	27.3765933602394	-0.215462874234683	0.0666372014887409	0.029801062471835
8	Arsenite	C7	6	38.1158024460546	-0.106832782194883	0.0887407526451645	0.0362282605618649
10	Arsenite	C7	6	49.2639368166155	-0.100759696547183	0.087681089284454	0.0357956548063877
13	Arsenite	C7	6	65.748196613876	-0.120197486650967	0.10736160665121	0.0438301923768101
16	Arsenite	C7	5	81.8407997861255	-0.168762250617883	0.0579124018815582	0.0258992134694902
21	Arsenite	C7	5	111.263610705531	-0.342061030248683	0.137676508080814	0.0615708061947
26	Arsenite	C7	5	141.603818232824	-0.219256569108283	0.0960137873130475	0.0429386710418362
31	Arsenite	C7	4	170.550508175188	-0.326744827790233	0.111369752879648	0.0556848764398238
36	Arsenite	C7	4	199.049704538886	-0.337869889370483	0.0643467999963457	0.0321733999981728
41	Arsenite	C7	6	230.149653732242	-0.44225906136065	0.166084549362892	0.0678037333498618
46	Arsenite	C7	6	263.553376702332	-0.526094974427983	0.137226018455266	0.0560222874415247
51	Arsenite	C7	6	294.556942889195	-0.31984140707565	0.117186509121347	0.0478411920142177
1	Arsenite	C8	6	4.26553827040173	0	0.123462486261743	0.0504033489527747
2	Arsenite	C8	6	9.24891031200775	-0.15088712311105	0.204048619883431	0.0833025002389212
3	Arsenite	C8	5	13.5925141102371	-0.038158278898984	0.0958795037195252	0.0428786175931604
4	Arsenite	C8	5	17.7597385165223	-0.02696629064031	0.0305421295954165	0.0136588555905919
5	Arsenite	C8	5	21.899642644018	-0.060305064090872	0.115067082734384	0.0514595637933351
6	Arsenite	C8	6	27.6941298999906	-0.222152075105767	0.178944169739635	0.0730536513846813
8	Arsenite	C8	5	38.9085721222377	-0.34401788909145	0.0824461709298463	0.0368710485367407
10	Arsenite	C8	6	49.2585754466304	-0.153224017032767	0.119593018579544	0.048823645386512
13	Arsenite	C8	6	66.4266163748179	-0.35397357199495	0.176515079920438	0.0720619796186108
16	Arsenite	C8	5	83.8295147556959	-0.40098585377485	0.109689419108371	0.0490545995077563
21	Arsenite	C8	2	111.778642053374	-0.96545081526345	0.238131603391564	0.168384471573
26	Arsenite	C8	4	146.168334921546	-0.6894983238267	0.203268169619598	0.101634084809799
31	Arsenite	C8	4	183.7045839406	-0.67328450724795	0.106304957409261	0.0531524787046303
36	Arsenite	C8	3	220.772044854392	-0.662742299183783	0.153912390815988	0.0888613602692298
41	Arsenite	C8	3	257.149810040441	-0.660337737336117	0.191421327520125	0.11051715497238
46	Arsenite	C8	6	292.282761055075	-0.627060829290117	0.204326421557121	0.0834159122972934
51	Arsenite	C8	6	325.080853401594	-0.456204948569117	0.11675049091416	0.0476631883265224
1	Arsenite	C9	5	3.54635777548602	0	0.112581277055777	0.0503478776980911
2	Arsenite	C9	6	7.8420287220069	-0.113550128757433	0.0712927651693437	0.0291051495028262
3	Arsenite	C9	5	12.3551272252659	-0.13764672599648	0.161763687513364	0.072342920314183
4	Arsenite	C9	5	16.0464820297511	0.08818985129314	0.120317020250713	0.0538074072261624
5	Arsenite	C9	5	19.69218555121	0.036417673259596	0.10461064009202	0.0467833004831045
6	Arsenite	C9	6	24.3843619757385	-0.0644512770554333	0.165540568257593	0.0675816539935788
8	Arsenite	C9	6	33.4813055908739	-0.154753617842167	0.197486698199105	0.0806236069291376
10	Arsenite	C9	6	43.5173837104179	-0.328089299640767	0.125914319418523	0.0514043056475327
13	Arsenite	C9	6	59.08994861646	-0.370967126021433	0.139640113377632	0.0570078375665981
16	Arsenite	C9	5	74.3940845432467	-0.4807061559632	0.146150858237768	0.0653606507979167
21	Arsenite	C9	6	100.159049757949	-0.3353812713121	0.163069481473663	0.0665728370384516
26	Arsenite	C9	6	126.222421741829	-0.3982528443816	0.192527217043717	0.0785989072258625
31	Arsenite	C9	5	152.908171043348	-0.4981169488402	0.217797358187321	0.097401939645344
36	Arsenite	C9	5	179.612850602698	-0.39797511	0.137832848427201	0.0616407237231294
41	Arsenite	C9	6	206.644546955302	-0.4423148141411	0.220417862139491	0.0899852154061467
46	Arsenite	C9	6	233.949870373495	-0.5298483522011	0.214027857778034	0.0873765070495251
51	Arsenite	C9	6	261.381881346355	-0.461069209216933	0.220053024833268	0.0898362711995837
1	Arsenite	D1	6	3.7797208444863	0	0.0453412128668311	0.0185104726404419
2	Arsenite	D1	6	7.4674088800028	0.0268610242994433	0.0980919459552086	0.0400458692444876
3	Arsenite	D1	5	11.8920929985332	-0.20154650417854	0.146312129231805	0.0654327733790098
4	Arsenite	D1	5	15.4829933172091	0.078383801384712	0.0453679278130391	0.0202891541176517
5	Arsenite	D1	5	19.5569925956388	-0.04914206772222	0.109675037940583	0.0490481680540023
6	Arsenite	D1	6	23.8386451800954	-0.13995701441899	0.117426816478255	0.0479392970818613
8	Arsenite	D1	6	33.9817263880606	-0.335218653848007	0.123230852826558	0.0503087849988463
10	Arsenite	D1	6	44.8048210048732	-0.335314441892173	0.167806739499932	0.0685068145291621
13	Arsenite	D1	6	61.7713872525465	-0.399006521971007	0.155060905759846	0.0633033496942352
16	Arsenite	D1	5	78.3833386695847	-0.38987278928594	0.1407268739449	0.062934971280368
21	Arsenite	D1	6	107.034045942221	-0.375408134806007	0.230845774634925	0.0942423928555144
26	Arsenite	D1	6	133.372987543117	-0.251540843146673	0.103279543346859	0.0421636970112435
31	Arsenite	D1	5	156.816162357462	-0.16443341582934	0.0466978967766038	0.0208839343197509
36	Arsenite	D1	5	179.67638803508	-0.17557847670346	0.205800858275834	0.092036941786513
41	Arsenite	D1	6	203.112046239842	-0.18773190312029	0.120862550779894	0.0493419297369936
46	Arsenite	D1	6	227.250940919884	-0.312064118326507	0.119663990956498	0.0488526197380735
51	Arsenite	D1	6	251.702603075616	-0.301749272563007	0.146686727615798	0.0598846057828879
1	Arsenite	D10	6	3.90267332673694	0	0.0828018651873677	0.0338037199099621
2	Arsenite	D10	6	7.8757640110272	0.0272320139597833	0.0970674694751553	0.0396276284728853
3	Arsenite	D10	5	11.5776607878867	0.10034995614173	0.093625691558295	0.0418706821529552
4	Arsenite	D10	5	15.2784912636139	0.06756190628305	0.122495210809164	0.0547815236574918
5	Arsenite	D10	5	21.1658686314391	-0.54087036688365	0.193599791574997	0.0865804588782967
6	Arsenite	D10	6	25.6148431050926	0.0138217477811833	0.115367476744865	0.0470985751562208
8	Arsenite	D10	6	34.9116469760569	-0.225511599226283	0.119712020572338	0.0488722277466316
10	Arsenite	D10	6	44.3824316120834	-0.0680764121158833	0.190021273368096	0.0775758600042916
13	Arsenite	D10	2	62.0816855128118	-0.64120690860495	0.311650666118223	0.2203702993735
16	Arsenite	D10	4	81.5319662512053	-0.5672508259982	0.349833077385426	0.174916538692713
21	Arsenite	D10	2	115.586938041949	-0.87611916704245	0.148618222470809	0.105088952917
26	Arsenite	D10	4	151.336550868883	-0.68486200584095	0.205526971764128	0.102763485882064
31	Arsenite	D10	4	187.204821911968	-0.6829251184697	0.258336208774977	0.129168104387488
36	Arsenite	D10	3	223.733428912556	-0.570070668349783	0.163268706442238	0.0942632316146682
41	Arsenite	D10	1	260.095016820835	-0.95428567143945	NA	NA
46	Arsenite	D10	4	296.237381673851	-0.93535024850795	0.114789202664502	0.0573946013322508
51	Arsenite	D10	5	332.647290759999	-0.60405895557105	0.235269400773693	0.105215674631124
1	Arsenite	D11	5	3.25254694569093	0	0.132535303414668	0.0592715895707515
2	Arsenite	D11	6	6.74496059332301	-0.10295605077316	0.0878064437558917	0.0358468305550541
3	Arsenite	D11	5	10.235947199517	-0.07973306941892	0.180291932196006	0.0806290032370103
4	Arsenite	D11	5	13.295309051189	-0.01603488974746	0.112972004865486	0.0505226164867326
5	Arsenite	D11	5	17.0074692049889	-0.25601272123238	0.054297807433193	0.0242827176899626
6	Arsenite	D11	6	21.1412262313483	-0.182061513007813	0.0989037772944183	0.0403772980008649
8	Arsenite	D11	6	28.6022823594967	-0.12402198085208	0.104665294151057	0.0427294274080665
10	Arsenite	D11	6	37.7737489250401	-0.39270551550078	0.142600008255568	0.0582162095904685
13	Arsenite	D11	5	56.0116104414197	-0.76013556153678	0.220065938954135	0.098416479806753
16	Arsenite	D11	4	75.9569771952616	-1.07613119327878	0.171819846232748	0.0859099231163738
21	Arsenite	D11	6	110.072772784556	-0.814695326091613	0.417892847864102	0.170604040737595
26	Arsenite	D11	6	138.833275443996	-0.409784753200947	0.208080697832794	0.0849485891687659
31	Arsenite	D11	5	163.26580039616	-0.41674892335978	0.225646951741963	0.100912384602129
36	Arsenite	D11	5	187.401843440022	-0.34023352690598	0.161652812747293	0.0722933356113984
41	Arsenite	D11	6	211.568771493163	-0.364142979868447	0.205813384408758	0.0840229623394574
46	Arsenite	D11	6	235.466639551338	-0.482216013758447	0.272786633162629	0.111364676650036
51	Arsenite	D11	6	259.599874184826	-0.451230841776447	0.271418341872859	0.110806074070131
1	Arsenite	D12	6	2.73104376455171	0	0.0544286959941424	0.0222204220917859
2	Arsenite	D12	6	6.328333983788	-0.201118425726467	0.192100783902085	0.0784248166247942
3	Arsenite	D12	5	10.7457215533542	-0.33948209685585	0.126680135145894	0.0566530787170157
4	Arsenite	D12	5	13.6391687100314	0.01475939581991	0.0717630216708512	0.0320933989453628
5	Arsenite	D12	5	16.6075285797769	-0.16223693372021	0.199288346518819	0.0891244579879227
6	Arsenite	D12	6	20.7805110093639	-0.333265823362017	0.264775252597918	0.108094044230237
8	Arsenite	D12	6	28.1217608170668	-0.269607573948867	0.180461942977858	0.0736732797144978
10	Arsenite	D12	6	36.4991064525419	-0.35793716641695	0.159814785576463	0.0652441130024397
13	Arsenite	D12	6	50.0612721512952	-0.438590041572833	0.32121280607624	0.131134578955726
16	Arsenite	D12	5	64.0662377385269	-0.80547591027325	0.330087017285804	0.147619401828241
21	Arsenite	D12	6	89.8794779880336	-0.688283082881117	0.438830081523874	0.179151630586239
26	Arsenite	D12	6	117.316368438475	-0.76890092243745	0.352915085370925	0.144076980281589
31	Arsenite	D12	5	144.689370671652	-0.73486099513525	0.172874115344126	0.0773116546919209
36	Arsenite	D12	5	170.509969032716	-0.51506047470385	0.262951326008765	0.117595407945862
41	Arsenite	D12	6	195.360315000323	-0.549433373576283	0.379613835324855	0.154976699307803
46	Arsenite	D12	6	220.10981481894	-0.686838661212617	0.462623462133207	0.188865237544355
51	Arsenite	D12	6	244.979949525841	-0.541766057201283	0.422815310281466	0.172613627604357
1	Arsenite	D2	6	3.86120123001254	0	0.151211548787963	0.061731856291079
2	Arsenite	D2	6	7.70398553161824	0.0676432968124833	0.025914314811519	0.010579474720345
3	Arsenite	D2	5	12.5849645679692	-0.314551434112767	0.103943574968508	0.046484979890786
4	Arsenite	D2	5	16.4298927337727	0.0401425688005133	0.0468831931955541	0.0209668013975029
5	Arsenite	D2	5	20.1382526094042	0.00321728145947334	0.0708764413808162	0.0316969081861568
6	Arsenite	D2	6	24.9426009857696	-0.14592312627425	0.151049947741076	0.06166588293995
8	Arsenite	D2	6	34.7183569031543	-0.298854933294367	0.180431769399228	0.0736609614026047
10	Arsenite	D2	6	44.8799413626017	-0.274736938211533	0.121994477204808	0.0498040367648955
13	Arsenite	D2	6	59.7471013360044	-0.2111158320582	0.0759998278155121	0.0310267997812307
16	Arsenite	D2	5	74.2279802580248	-0.241729638239567	0.039103797302016	0.0174877497891361
21	Arsenite	D2	6	98.7100048690332	-0.212489793714867	0.0467045733620703	0.0190670622319093
26	Arsenite	D2	6	123.532881107172	-0.2112159908787	0.0762587096018689	0.0311324878279432
31	Arsenite	D2	5	147.906751007111	-0.227715171853367	0.0386115158593101	0.0172675948351457
36	Arsenite	D2	5	172.16790900581	-0.241610933634167	0.0795212102984858	0.0355629663760941
41	Arsenite	D2	6	196.86830155498	-0.199642786438367	0.0667941705848864	0.0272686059542315
46	Arsenite	D2	6	221.504503926171	-0.2432682807352	0.0355365761421724	0.0145077464589808
51	Arsenite	D2	6	246.164235528611	-0.211368101546867	0.0555437367011577	0.0226756355542226
1	Arsenite	D3	6	3.95250295366552	0	0.0750982037785779	0.0306587133095112
2	Arsenite	D3	6	8.32697316751733	-0.0848641723656033	0.102181082358905	0.04171525219077
3	Arsenite	D3	5	12.5545056317872	-0.0684261275731733	0.110146926001312	0.0492592028103146
4	Arsenite	D3	5	16.5477546525358	-0.0534365582612033	0.103210607519232	0.0461571868824107
5	Arsenite	D3	5	21.3550559682074	-0.332163606370883	0.0653540174779752	0.0292272051366924
6	Arsenite	D3	6	25.9392782883866	-0.0944650573291333	0.0726105771856696	0.029643144005644
8	Arsenite	D3	6	34.7903754552951	-0.06605407259725	0.102101009022719	0.0416825623881605
10	Arsenite	D3	1	47.4888268261618	-0.484943446820083	NA	NA
13	Arsenite	D3	2	67.6109321127156	-0.664113541041583	0.102471123154714	0.0724580260585
16	Arsenite	D3	5	85.3565338195229	-0.444739277249283	0.0851415356291882	0.038076452275117
21	Arsenite	D3	6	114.674209045805	-0.413139872803583	0.150991355453721	0.0616419627388031
26	Arsenite	D3	6	142.464265881279	-0.319660992679417	0.0891159272283302	0.0363814249440678
31	Arsenite	D3	5	167.648831567546	-0.277255818078483	0.0823227807310894	0.0368158667623051
36	Arsenite	D3	5	192.244984207781	-0.269476828288283	0.118516879655846	0.0530023598783268
41	Arsenite	D3	6	217.117068859605	-0.26043783031675	0.0865326626877378	0.035326811611555
46	Arsenite	D3	6	242.162237098307	-0.279147964725083	0.094753729225002	0.0386830479711828
51	Arsenite	D3	6	267.548596142625	-0.247421629173083	0.0980400216583104	0.0400246712390453
1	Arsenite	D4	6	4.16256980109089	0	0.069616027438804	0.0284206241907771
2	Arsenite	D4	6	8.999591427708	-0.151631094261883	0.0936990775521572	0.0382524882287091
3	Arsenite	D4	5	13.3600883136668	-0.0752971972509033	0.0381783464336469	0.0170738755788342
4	Arsenite	D4	5	17.5644217939752	-0.0443528204520233	0.0431133180341604	0.0192808619719901
5	Arsenite	D4	5	21.9668579847335	-0.131549963688803	0.128847165937114	0.0576222043487164
6	Arsenite	D4	4	26.8658899806226	-0.217482245469883	0.216438022708281	0.10821901135414
8	Arsenite	D4	6	36.6713407503941	-0.194451198773717	0.0675227379329803	0.0275660423285787
10	Arsenite	D4	6	47.4986603171003	-0.30990520733205	0.134277988694087	0.0548187593312869
13	Arsenite	D4	5	64.8317718298375	-0.373037858666183	0.0538097589577219	0.0240644557764689
16	Arsenite	D4	4	85.330683025148	-0.632669725178383	0.0634375000316707	0.0317187500158354
21	Arsenite	D4	6	118.304322741836	-0.463263885195883	0.124878192015406	0.0509813084065074
26	Arsenite	D4	6	149.3259833618	-0.488317825082217	0.12508570622789	0.051066025729001
31	Arsenite	D4	5	177.68204805761	-0.338847258793183	0.0342872568807847	0.0153337274294864
36	Arsenite	D4	5	203.744116901357	-0.338698320855183	0.0457182029717636	0.0204458019307992
41	Arsenite	D4	5	229.884533612861	-0.330520497296983	0.113732828606445	0.0508628672074687
46	Arsenite	D4	6	256.459471184645	-0.312337411605217	0.0774500846645256	0.0316188646605741
51	Arsenite	D4	6	283.942979171647	-0.329298859634717	0.110279468800257	0.0450214046109677
1	Arsenite	D5	5	4.3053047697439	0	0.0643169871115129	0.0287634310578641
2	Arsenite	D5	6	9.35103437429681	-0.171116196824857	0.100665459317997	0.041096501675332
3	Arsenite	D5	5	14.3724980049299	-0.17553054766344	0.0742396902264119	0.0332009987949568
4	Arsenite	D5	5	18.8312928390981	-0.0339740932541	0.0862411386667693	0.0385682097031764
5	Arsenite	D5	5	23.412797058241	-0.13036937522026	0.11137514320108	0.0498084782402779
6	Arsenite	D5	5	28.6069625923256	-0.13490630864678	0.0918032816214414	0.04105567565262
8	Arsenite	D5	6	38.3353676687216	-0.0834194287890233	0.0656911647342097	0.0268183057013211
10	Arsenite	D5	3	49.6649668276873	-0.30729062701604	0.149244177738994	0.0861661661925925
13	Arsenite	D5	0	68.0085483736385	NA	NA	NA
16	Arsenite	D5	1	87.0100270709731	-0.56342954068504	NA	NA
21	Arsenite	D5	0	118.423204099654	NA	NA	NA
26	Arsenite	D5	1	148.800626876703	-0.65379684052104	NA	NA
31	Arsenite	D5	1	184.200204125607	-0.67405512176404	NA	NA
36	Arsenite	D5	0	222.806712046372	NA	NA	NA
41	Arsenite	D5	0	260.717597561897	NA	NA	NA
46	Arsenite	D5	0	297.932860672182	NA	NA	NA
51	Arsenite	D5	5	334.452501377226	-0.59209420021224	0.0772673770016842	0.034555021483774
1	Arsenite	D6	6	4.50771816951024	0	0.0761113412247254	0.0310723249399059
2	Arsenite	D6	6	10.0146367706593	-0.200748920136917	0.0883031538045969	0.0360496115832942
3	Arsenite	D6	5	15.3157802393173	-0.163266754790003	0.15415876575727	0.0689418959121445
4	Arsenite	D6	5	19.6224233036843	0.0511204552184707	0.0431830247392814	0.0193120357582177
5	Arsenite	D6	5	24.2466561795092	-0.0964669357992633	0.139865290881207	0.062549659620632
6	Arsenite	D6	4	29.141373753322	-0.147094631239083	0.110170090753687	0.0550850453768436
8	Arsenite	D6	6	40.3945414361238	-0.29683220330575	0.0860956202195982	0.035148389771077
10	Arsenite	D6	2	51.3227413463737	-0.0376291804178333	0.0136047600619914	0.00962001809625
13	Arsenite	D6	0	67.21371517364	NA	NA	NA
16	Arsenite	D6	3	82.9623589069514	-0.359437676976417	0.117559669048113	0.0678731065707712
21	Arsenite	D6	0	111.84413815736	NA	NA	NA
26	Arsenite	D6	2	145.247770689951	-0.555654409108083	0.0135559733155368	0.00958552065699997
31	Arsenite	D6	4	180.802282259174	-0.605133015406333	0.0620577539190431	0.0310288769595216
36	Arsenite	D6	2	217.076473845907	-0.638753314990583	0.0204897149411974	0.0144884163795
41	Arsenite	D6	4	254.354168880951	-0.501127244888583	0.118865099044876	0.0594325495224378
46	Arsenite	D6	5	289.432024005501	-0.514857586436483	0.144558909813477	0.0646487098192393
51	Arsenite	D6	5	321.649745091716	-0.421121495954683	0.146851554836274	0.0656740118430891
1	Arsenite	D7	6	4.65317108616313	0	0.0707147542665138	0.0288691775398764
2	Arsenite	D7	6	9.42859936477492	-0.01037218055785	0.138866332899199	0.0566919430090837
3	Arsenite	D7	5	14.8221745122883	-0.13367679921447	0.165226430854559	0.0738915062140925
4	Arsenite	D7	5	19.8013248914214	-0.09036836370367	0.135307153885857	0.0605111987861603
5	Arsenite	D7	5	25.7403461555816	-0.31207878720775	0.057772409260719	0.0258366068661812
6	Arsenite	D7	3	31.6721839828594	-0.17862408215245	0.150703976425585	0.0870089813572587
8	Arsenite	D7	6	42.8017815982281	-0.273966436198617	0.0790163305544812	0.0322582818675945
10	Arsenite	D7	5	54.193956040676	-0.21195046111755	0.148218025844688	0.0662851162559085
13	Arsenite	D7	0	73.3115818561756	NA	NA	NA
16	Arsenite	D7	2	95.0928017693105	-0.56253167278545	0.0143380972495939	0.0101385657945
21	Arsenite	D7	4	133.556207029909	-0.5130737189657	0.133294024713298	0.0666470123566491
26	Arsenite	D7	1	172.240416740482	-0.54990473391395	NA	NA
31	Arsenite	D7	2	210.37278947879	-0.64846714413445	0.11084110351195	0.0783764959275
36	Arsenite	D7	1	248.558725977148	-0.58551151238895	NA	NA
41	Arsenite	D7	0	286.868072304653	NA	NA	NA
46	Arsenite	D7	3	325.030173292465	-0.639002589144617	0.185626943863784	0.107171766008603
51	Arsenite	D7	3	362.563380922041	-0.665166188255283	0.131105372766986	0.0756937222592254
1	Arsenite	D8	6	4.2229494638119	0	0.110247746069328	0.0450084538602974
2	Arsenite	D8	6	8.83666505301692	-0.0787485693813967	0.0962677977259934	0.0393011638483578
3	Arsenite	D8	5	13.8047948308282	-0.187266835469015	0.197553041128269	0.0883484058249243
4	Arsenite	D8	5	17.9928379548002	-0.018945298364215	0.0711293843300954	0.0318100277119603
5	Arsenite	D8	5	22.4429320399725	-0.185334796284795	0.216647137422924	0.0968875452816794
6	Arsenite	D8	6	27.2062050191994	-0.0526493960202217	0.155012376025048	0.0632835375129674
8	Arsenite	D8	6	36.7021558959925	-0.150204027148055	0.0767258860602751	0.0313232118184325
10	Arsenite	D8	6	47.0655932774152	-0.234774844082455	0.140702290627149	0.0574414696128834
13	Arsenite	D8	6	63.3479352791143	-0.365006251296288	0.133797157720945	0.0546224609084997
16	Arsenite	D8	5	78.732178292592	-0.354754634170055	0.050237314052223	0.0224668098455552
21	Arsenite	D8	3	107.81587434117	-0.498294495968788	0.0827988626600017	0.0478039456453468
26	Arsenite	D8	5	140.147265870656	-0.413273929734055	0.110821946129565	0.0495610809889055
31	Arsenite	D8	4	174.211086703343	-0.537657709566705	0.10470657188248	0.0523532859412398
36	Arsenite	D8	2	206.849813853501	-0.432046232287955	0.111672075233101	0.0789640816665
41	Arsenite	D8	6	238.723872405272	-0.403678287651288	0.0809784036050685	0.033059294836262
46	Arsenite	D8	6	269.795371658033	-0.355123207589288	0.0856706884086165	0.03497491208568
51	Arsenite	D8	2	302.30257916327	-0.582340881259455	0.0126971924988956	0.00897827091800002
1	Arsenite	D9	6	4.34927632180887	0	0.125145266164182	0.0510903409711724
2	Arsenite	D9	6	8.50599098586449	0.0256870056547167	0.158909917432222	0.0648747021294581
3	Arsenite	D9	5	12.9324266600256	-0.0429958998459067	0.0894558557325238	0.0400058748806675
4	Arsenite	D9	5	16.8333311064914	0.0546870648980273	0.135723314882313	0.0606973116416923
5	Arsenite	D9	5	20.9093576774455	0.0110314299858733	0.088591795345201	0.0396194553281238
6	Arsenite	D9	6	25.4657648423255	-0.01007901621715	0.0948724463476128	0.0387315140335375
8	Arsenite	D9	6	35.187819110429	-0.128342270016733	0.103776630678793	0.0423666320647168
10	Arsenite	D9	6	45.8829840085347	-0.3161753532174	0.166629639692762	0.0680262655451796
13	Arsenite	D9	6	62.8247463521325	-0.197759260972067	0.0416249797949494	0.0169933268418809
16	Arsenite	D9	5	78.8232390830721	-0.220530343534567	0.147229363986244	0.0658429732314603
21	Arsenite	D9	2	110.126906736457	-0.542233858336067	0.259117616082743	0.183223823457
26	Arsenite	D9	5	144.705559320733	-0.642238963128867	0.160966322115709	0.0719863276677705
31	Arsenite	D9	3	179.840787930219	-0.664706321601733	0.313496515120604	0.18099729739489
36	Arsenite	D9	2	214.442382045785	-0.474132016086567	0.154126240753372	0.1089837099955
41	Arsenite	D9	4	249.671559387343	-0.572177023031067	0.201361216677478	0.100680608338739
46	Arsenite	D9	2	285.540503444027	-0.746337471277567	0.153352376992539	0.1084365056825
51	Arsenite	D9	5	320.926469733741	-0.577088609887867	0.240504411415938	0.107556842562923
1	Arsenite	E1	6	3.78019407631642	0	0.0785705515877131	0.0320762933664866
2	Arsenite	E1	6	7.74460432708117	-0.0248942556106417	0.0741566398611529	0.03027432144986
3	Arsenite	E1	5	11.66084208628	0.0416847551095283	0.122915606529656	0.0549695303391857
4	Arsenite	E1	5	15.485650821554	0.0174889270045883	0.0811517598675096	0.0362921703114981
5	Arsenite	E1	5	19.9151313614958	-0.102489901662132	0.122154623320651	0.0546292083021716
6	Arsenite	E1	6	24.4364119846771	0.000993808798258333	0.157681293234222	0.0643731184010022
8	Arsenite	E1	6	33.7898704430615	0.0299138894795417	0.0792944984324442	0.0323718434282348
10	Arsenite	E1	6	43.5161287366241	-0.132500376809623	0.0974132296477047	0.0397687844722392
13	Arsenite	E1	6	57.6691655086296	-0.0657658762680583	0.0680041149088171	0.0277625636560327
16	Arsenite	E1	5	70.0592826264935	-0.0671186533998117	0.0995268969740532	0.0445097814447202
21	Arsenite	E1	6	93.2349523639856	-0.166640455155625	0.129650439417616	0.0529295702501303
26	Arsenite	E1	6	118.292504566443	-0.232893986348258	0.124081950037727	0.0506562439803244
31	Arsenite	E1	5	142.177772480161	-0.164415442120532	0.109190880851298	0.0488316464213164
36	Arsenite	E1	5	167.329161307517	-0.369875253697092	0.0870987596841559	0.0389517494819381
41	Arsenite	E1	6	192.616423155961	-0.176039031859408	0.101146590791032	0.0412929227766866
46	Arsenite	E1	6	216.363906134155	-0.128240274202375	0.109795350075602	0.0448237639692459
51	Arsenite	E1	6	240.121483448701	-0.133537493081992	0.126459357608985	0.0516268165570264
1	Arsenite	E10	6	3.46522188407012	0	0.109028720249914	0.04451078865349
2	Arsenite	E10	6	7.07255123567443	0.06474100609545	0.0330880351662752	0.01350813379144
3	Arsenite	E10	5	10.9487492656922	-0.0865781613626633	0.11728190973487	0.0524500645396329
4	Arsenite	E10	5	14.15900977604	0.144767869648557	0.155521442169724	0.0695513033300611
5	Arsenite	E10	5	19.3906719628953	-0.467567492456983	0.254642819422744	0.113879730842292
6	Arsenite	E10	6	23.3687280414	0.0137590892302833	0.0682108578298673	0.0278469661001169
8	Arsenite	E10	6	32.0618270256684	-0.23748379960855	0.244646231180167	0.0998764056477301
10	Arsenite	E10	6	41.5472463866896	-0.225635108649217	0.170405136883316	0.0695676058188744
13	Arsenite	E10	6	56.5011288368876	-0.2051969769479	0.158326407360447	0.0646364851401876
16	Arsenite	E10	5	70.8712283278662	-0.336719095842163	0.171341179357516	0.0766261048776778
21	Arsenite	E10	4	100.376216877803	-0.716165977741983	0.206176751436313	0.103088375718157
26	Arsenite	E10	6	130.15365109044	-0.53536085174015	0.263515254307031	0.107579652081995
31	Arsenite	E10	5	156.332513980162	-0.497982703735583	0.155939836369556	0.0697384149045042
36	Arsenite	E10	4	183.884988639585	-0.557857698511983	0.186700221604381	0.0933501108021905
41	Arsenite	E10	6	212.847707852648	-0.601140623309317	0.246153933419996	0.100491922509669
46	Arsenite	E10	6	241.58528597386	-0.644532052304817	0.179633856350234	0.0733352147644142
51	Arsenite	E10	6	269.303528386421	-0.512260358410983	0.220370956244352	0.0899660661546436
1	Arsenite	E11	6	3.29627275121318	0	0.0689556995965133	0.0281510464780162
2	Arsenite	E11	6	6.86437864504505	-0.04269881831403	0.0976221666866448	0.039854082661201
3	Arsenite	E11	5	10.3701284974059	-0.044750760653473	0.0876689960931281	0.0392067669566796
4	Arsenite	E11	5	13.4158127484908	0.078716409189555	0.0337253389711101	0.015082430100725
5	Arsenite	E11	5	17.9153341072311	-0.393685619489725	0.185683244212656	0.0830400712684387
6	Arsenite	E11	6	22.2232995716092	-0.191386894508133	0.19225648572744	0.0784883816288173
8	Arsenite	E11	6	31.0061069740901	-0.291852610831792	0.0757181008283544	0.0309117852203461
10	Arsenite	E11	6	40.6900998287256	-0.358977586770125	0.178924637101535	0.0730456772185687
13	Arsenite	E11	6	59.0858250550835	-0.664291385552292	0.219394512704842	0.0895674347489041
16	Arsenite	E11	5	80.3408096276295	-1.09470271295753	0.263420135069541	0.117805065731534
21	Arsenite	E11	5	117.14729527034	-0.978216768910925	0.437172027152052	0.195509274114674
26	Arsenite	E11	6	149.252430322865	-0.659056713683958	0.26675023172082	0.108900326080864
31	Arsenite	E11	5	176.186878467471	-0.476107103690925	0.22571391439879	0.100942331212653
36	Arsenite	E11	5	201.681830976822	-0.419951057988725	0.179741492643953	0.0803828391858315
41	Arsenite	E11	6	227.414902957226	-0.473042424600625	0.227354446855358	0.0928170642580572
46	Arsenite	E11	6	252.680084712061	-0.491198578514792	0.273831203224096	0.1117911205919
51	Arsenite	E11	6	278.226369702947	-0.491792581974625	0.291540921516789	0.119021082809488
1	Arsenite	E12	6	2.90582901734324	0	0.0696257047448491	0.0284245749344263
2	Arsenite	E12	6	6.07988900755349	-0.000491651869434992	0.0877254990080989	0.0358137850001457
3	Arsenite	E12	5	10.3145661397879	-0.300294077847402	0.174744248916843	0.0781480038510409
4	Arsenite	E12	5	13.0415065248401	0.19032354344716	0.06653443267854	0.0297551028627198
5	Arsenite	E12	5	15.7647328158584	0.142014037029338	0.0624948910651185	0.0279485649336098
6	Arsenite	E12	6	19.2617042489412	0.0933401396849483	0.100362492782506	0.0409728161051498
8	Arsenite	E12	6	26.532469862406	-0.299795524930218	0.261136413605314	0.106608494432234
10	Arsenite	E12	6	34.8258764875213	-0.172002767486002	0.151857432546364	0.0619955372312845
13	Arsenite	E12	6	49.3454411394048	-0.409801248901502	0.272923109777569	0.111420392994774
16	Arsenite	E12	5	65.0863038126396	-0.744612605224802	0.257837598979485	0.115308479694692
21	Arsenite	E12	6	96.6595895074912	-0.850391088623835	0.403533045534404	0.164741675985097
26	Arsenite	E12	5	131.126372777173	-0.998324917721402	0.33775141164716	0.151047023187913
31	Arsenite	E12	5	164.725236812536	-0.898455780674002	0.219396239511908	0.0981169811112901
36	Arsenite	E12	5	198.369523302119	-0.879653019797002	0.193878000212712	0.0867048775634684
41	Arsenite	E12	6	232.544577771631	-0.965173891093168	0.392698697393359	0.160318571878225
46	Arsenite	E12	6	266.164572103484	-0.974664716499835	0.349416429840985	0.142648660142569
51	Arsenite	E12	6	295.273778329988	-0.588404124087335	0.289705130959429	0.118271624452796
1	Arsenite	E2	6	4.00591339042204	0	0.0898008330040316	0.0366610365561268
2	Arsenite	E2	6	8.39431629414976	-0.15142192534445	0.0790876890765098	0.0322874138622227
3	Arsenite	E2	5	12.8706440439458	-0.122636931510583	0.0741123251658017	0.0331440394082602
4	Arsenite	E2	5	16.6011732673269	0.0745789377511567	0.0569279643969107	0.025458959642436
5	Arsenite	E2	5	21.3165405363105	-0.244343763812183	0.0866039863585214	0.0387304801240237
6	Arsenite	E2	6	25.6854301168479	-0.0692407990665496	0.133828094359216	0.0546350907381865
8	Arsenite	E2	6	34.5279688808929	-0.0900381440171334	0.0848079764442934	0.0346227114010823
10	Arsenite	E2	6	44.5037872623335	-0.25530834108745	0.0787779817782541	0.0321609763871656
13	Arsenite	E2	6	60.2146209736634	-0.254731288372617	0.094793232963043	0.038699175304705
16	Arsenite	E2	5	77.1062919981875	-0.454339162375783	0.111833058953978	0.0500132643905674
21	Arsenite	E2	5	108.970169432298	-0.504108693509983	0.136704128666763	0.061135944900752
26	Arsenite	E2	3	141.605956160767	-0.438829177811117	0.214479126461878	0.123829581398321
31	Arsenite	E2	4	173.016912451484	-0.465274945531533	0.136302390579925	0.0681511952899624
36	Arsenite	E2	5	200.267788925684	-0.261017175479183	0.123695029751039	0.0553180990004365
41	Arsenite	E2	6	224.705133518146	-0.179782682359783	0.0780749579226301	0.0318739680999518
46	Arsenite	E2	6	248.792621725049	-0.18715478229845	0.0905289253610518	0.03695827901618
51	Arsenite	E2	6	272.926760817323	-0.167805719189783	0.0613113367069514	0.0250302483966672
1	Arsenite	E3	6	3.80307001404594	0	0.0526355632093722	0.0214883786978288
2	Arsenite	E3	6	8.95662328040502	-0.302924969252317	0.157605219263474	0.0643420613324955
3	Arsenite	E3	5	13.1899299670289	-0.144785215144513	0.084733375259424	0.0378939174086142
4	Arsenite	E3	5	17.1516610310138	-0.112451625948263	0.0677427160869243	0.0302954636301663
5	Arsenite	E3	5	21.1371970143757	-0.166031855452513	0.0582120195525634	0.0260332065654157
6	Arsenite	E3	6	25.3910702253485	-0.166855739874933	0.0632306857051174	0.025813819343972
8	Arsenite	E3	6	33.8171788720789	-0.135042020361218	0.111196688012131	0.0453958577861961
10	Arsenite	E3	6	43.118135002035	-0.377323392592733	0.103388379105544	0.0422081290236683
13	Arsenite	E3	6	57.7478597580815	-0.4586010633559	0.0885212530150947	0.0361386502131315
16	Arsenite	E3	5	72.4683768621792	-0.489106968774533	0.0600448463432457	0.0268528716244054
21	Arsenite	E3	6	97.103161649713	-0.4044897923894	0.118917454340247	0.0485478474407201
26	Arsenite	E3	6	121.832342110294	-0.4448462684174	0.115088399577776	0.0469846423798492
31	Arsenite	E3	5	146.268149571795	-0.473929002539533	0.0461075433627233	0.0206199202469137
36	Arsenite	E3	5	170.226902418603	-0.468355479126733	0.0513923379673275	0.0229833522435175
41	Arsenite	E3	6	194.575231040086	-0.4345672092924	0.166108934292246	0.0678136884555834
46	Arsenite	E3	6	219.368957216339	-0.487671664366233	0.11253221405266	0.0459410840091118
51	Arsenite	E3	6	244.159552750906	-0.369300675987133	0.144405522442716	0.0589533076707798
1	Arsenite	E4	6	4.24511519618887	0	0.0739650463355942	0.0301961037205867
2	Arsenite	E4	6	9.13001586783225	-0.184255062451755	0.0713893763802017	0.0291445908644986
3	Arsenite	E4	5	14.2194980432045	-0.290561393776555	0.0669117847002007	0.0299238598170958
4	Arsenite	E4	5	18.5485383613684	-0.118836844579895	0.0612772636203828	0.0274040253860701
5	Arsenite	E4	4	23.8326850775372	-0.402486795540005	0.0841016121231915	0.0420508060615958
6	Arsenite	E4	6	28.8794520072602	-0.263881738745205	0.212202150024871	0.0866311649804098
8	Arsenite	E4	6	38.104907307749	-0.111545045349572	0.236681123181945	0.096624663924096
10	Arsenite	E4	6	47.0258911764575	-0.0613957216677717	0.0846366222090153	0.0345527563274663
13	Arsenite	E4	6	63.1820843733677	-0.418878196802588	0.121361348199539	0.0495455629308516
16	Arsenite	E4	4	82.1129605965227	-0.548224318094505	0.172890023710752	0.0864450118553758
21	Arsenite	E4	5	113.862610113995	-0.577739496770755	0.0959888140847908	0.0429275026746363
26	Arsenite	E4	6	144.289302165503	-0.471222645859088	0.0757568955592722	0.0309276231029223
31	Arsenite	E4	5	172.111911347993	-0.403064854814555	0.0868882654455408	0.0388576135966551
36	Arsenite	E4	5	198.201515731431	-0.404790813318155	0.0606182869018842	0.0271093220384396
41	Arsenite	E4	6	225.792971122186	-0.409026930017922	0.0812121711943543	0.0331547300549537
46	Arsenite	E4	6	253.357611546482	-0.374412117428422	0.0965729149848685	0.0394257274476846
51	Arsenite	E4	6	280.358452006937	-0.296940713162588	0.0987466615294112	0.0403131557583958
1	Arsenite	E5	6	4.20255422313315	0	0.0323391171485803	0.0132023892910185
2	Arsenite	E5	6	8.81098038679202	-0.0124983338864733	0.0796522780054529	0.0325179063272785
3	Arsenite	E5	5	14.170464919984	-0.496583121973557	0.0724596299086507	0.032404931620044
4	Arsenite	E5	5	18.2477937768392	-0.00479633120049467	0.022288809529789	0.00996785864923066
5	Arsenite	E5	5	23.5106994466718	-0.304321718121357	0.0736480637006284	0.032936415369168
6	Arsenite	E5	5	28.8903252956045	-0.227681397149157	0.0808943873957164	0.0361770698430048
8	Arsenite	E5	6	39.0344069041343	-0.13108080133319	0.0803486731802121	0.0328022084668612
10	Arsenite	E5	6	49.2777635687435	-0.227368891052323	0.09166001114045	0.0374200428519873
13	Arsenite	E5	5	65.6312193586487	-0.215569893789757	0.0920397214121348	0.0411614147415353
16	Arsenite	E5	1	85.45737344113	-0.723000770257157	NA	NA
21	Arsenite	E5	5	117.66941050161	-0.479134197291757	0.0904599429890299	0.0404549163528453
26	Arsenite	E5	4	146.619191009325	-0.473973306905907	0.129892158538428	0.064946079269214
31	Arsenite	E5	5	174.016527161878	-0.419857848072357	0.0574140297952183	0.0256763346968613
36	Arsenite	E5	5	201.666467987386	-0.467016805256757	0.0771886855760264	0.0345198296083705
41	Arsenite	E5	6	230.63193437624	-0.463297730528157	0.1265671364141	0.0516708170699628
46	Arsenite	E5	6	259.193750048634	-0.40768921507449	0.0834596228399193	0.0340722483471558
51	Arsenite	E5	6	288.483559269525	-0.439989577312657	0.165979030806612	0.0677606555796481
1	Arsenite	E6	6	4.23287509981858	0	0.0990836648394658	0.0404507367836063
2	Arsenite	E6	6	9.16496760389748	-0.153211257683782	0.118442396403206	0.048353905850052
3	Arsenite	E6	4	14.0568055313486	-0.164757270287592	0.130691015010744	0.0653455075053719
4	Arsenite	E6	5	18.4230291577733	-0.0619182434981187	0.0555214127343074	0.0248299306161468
5	Arsenite	E6	5	23.6636402941476	-0.296900955709267	0.0927260656654251	0.0414683572228
6	Arsenite	E6	2	29.4407218626262	-0.393957982393467	0.0742865970099388	0.052528556497
8	Arsenite	E6	6	39.3429776311254	-0.182490975454887	0.0932372055753416	0.038063929783761
10	Arsenite	E6	6	49.0145003586396	-0.12515465274475	0.166855397771813	0.0681184308950106
13	Arsenite	E6	1	65.4962091130026	-0.517679168426467	NA	NA
16	Arsenite	E6	1	83.0488434798847	-0.638997135560467	NA	NA
21	Arsenite	E6	2	118.051960380954	-0.812627571694467	0.0460625552499222	0.032571145176
26	Arsenite	E6	6	151.594560757795	-0.430239003803467	0.0695553341723375	0.0283958462684995
31	Arsenite	E6	5	180.436133163674	-0.422800006669067	0.056422526105787	0.0252329207669592
36	Arsenite	E6	5	208.033302595641	-0.417755050125467	0.116063864686092	0.0519053382338878
41	Arsenite	E6	6	235.668832069118	-0.393285751074967	0.0955978158837287	0.0390276449066114
46	Arsenite	E6	6	264.675772916373	-0.4580499803503	0.0470605986046792	0.0192124089285663
51	Arsenite	E6	6	293.999910783054	-0.400379092210633	0.087153848848832	0.0355804097998816
1	Arsenite	E7	6	4.46843374795965	0	0.04864356864851	0.0198586537428158
2	Arsenite	E7	6	9.30298283089198	-0.0526429824459117	0.0772214450895071	0.0315255229449403
3	Arsenite	E7	5	14.0335319187255	-0.06433128160217	0.111385354054122	0.0498130446725797
4	Arsenite	E7	5	18.3610425221494	0.01749728180211	0.0934971036257261	0.0418131758812931
5	Arsenite	E7	4	24.4626426462965	-0.36276559772451	0.179492790411875	0.0897463952059377
6	Arsenite	E7	2	30.2362513273933	-0.27387887326451	0.163832461198583	0.115847044292
8	Arsenite	E7	5	41.6858546420846	-0.30887538839631	0.157737912997477	0.070542539218261
10	Arsenite	E7	5	54.0062891201152	-0.30105827312331	0.0579808440047001	0.0259298217174641
13	Arsenite	E7	2	72.5430184146795	-0.34511842241501	0.159388048072992	0.1127043696325
16	Arsenite	E7	2	87.8828220202062	-0.30310678380351	0.161952725753578	0.114517870612
21	Arsenite	E7	1	115.865378413703	-0.65405322952351	NA	NA
26	Arsenite	E7	6	147.01734779551	-0.46700177331251	0.164630732158669	0.0672102149615909
31	Arsenite	E7	4	180.210086410729	-0.62664780301576	0.135511991193941	0.0677559955969703
36	Arsenite	E7	3	213.584474276723	-0.549708418201177	0.0587406077301721	0.0339139056853771
41	Arsenite	E7	0	245.807383710375	NA	NA	NA
46	Arsenite	E7	6	277.474135463173	-0.482643301141677	0.111858066658638	0.0456658644879818
51	Arsenite	E7	6	307.667887356269	-0.309960862299843	0.103292713186667	0.0421690735758311
1	Arsenite	E8	6	4.15423773800398	0	0.104789751942673	0.0427802370887286
2	Arsenite	E8	6	9.20668415376382	-0.14929800552355	0.168204762135588	0.0686693065897344
3	Arsenite	E8	5	14.3629747513459	-0.191784695264057	0.162287623589479	0.0725772316505945
4	Arsenite	E8	4	19.0715837225853	-0.0999118909553542	0.148347092240375	0.0741735461201877
5	Arsenite	E8	4	24.0788367699391	-0.254168047219967	0.198232362502688	0.099116181251344
6	Arsenite	E8	6	29.7825642430363	-0.275907503263883	0.12348775306448	0.0504136640817977
8	Arsenite	E8	5	40.905962143421	-0.358399327302717	0.092080343271344	0.0411795813892481
10	Arsenite	E8	6	51.6545718847208	-0.181710283460883	0.214672995870567	0.0876398835729148
13	Arsenite	E8	6	69.2618879671516	-0.36768281043555	0.153649300687988	0.0627270643368392
16	Arsenite	E8	4	89.2619049504216	-0.676383809522717	0.0991114428653208	0.0495557214326604
21	Arsenite	E8	1	125.738302890226	-0.716460798337717	NA	NA
26	Arsenite	E8	3	158.815034086649	-0.570400585660717	0.185266916604899	0.10696390417377
31	Arsenite	E8	3	190.29714827331	-0.623068859117383	0.15902672625951	0.0918141232142733
36	Arsenite	E8	2	225.438691879155	-0.582927094144717	0.0599482464428761	0.04238981158
41	Arsenite	E8	6	260.362639702378	-0.42067949365055	0.139275364322514	0.056858929388398
46	Arsenite	E8	6	293.533385166196	-0.462173431095883	0.119128396654146	0.048633964279756
51	Arsenite	E8	6	326.506807258618	-0.408843971809217	0.070212009373403	0.0286639327967245
1	Arsenite	E9	6	4.06525986786628	0	0.189302594807846	0.0772824607106767
2	Arsenite	E9	6	8.28779928637299	0.0183775495716017	0.0536441398072348	0.0219001283697081
3	Arsenite	E9	5	12.603600928984	-0.0756241122403367	0.127304200375538	0.0569321691721914
4	Arsenite	E9	5	16.378574491214	0.0680828817451453	0.107935842046664	0.048270376005004
5	Arsenite	E9	5	20.5485698287552	-0.0453653312063367	0.0709422008467798	0.0317263167133686
6	Arsenite	E9	6	24.9137654936079	0.00985144609504668	0.0975649095076612	0.0398307075157642
8	Arsenite	E9	6	33.4241497875804	-0.0270332192004667	0.126727216029897	0.05173616929945
10	Arsenite	E9	6	42.9193810202053	-0.0751352504243	0.221460716715493	0.0904109590040017
13	Arsenite	E9	5	61.4217635028405	-0.588789308060117	0.173875811896958	0.077759627008913
16	Arsenite	E9	5	80.1192679475172	-0.462208988099517	0.106778720708717	0.0477528956110313
21	Arsenite	E9	5	110.306795776161	-0.401873679783317	0.0753796968587829	0.0337108252599132
26	Arsenite	E9	6	140.111353016506	-0.386268756162817	0.0913500195878645	0.0372934893305861
31	Arsenite	E9	5	167.812169834076	-0.324115891689517	0.067020223258226	0.0299723550145211
36	Arsenite	E9	5	194.425503487655	-0.308538932022317	0.140804886573154	0.062969859588344
41	Arsenite	E9	6	221.938987571456	-0.370302370188483	0.157251814240691	0.0641977843361031
46	Arsenite	E9	6	249.505739653848	-0.337273182585983	0.133270010985265	0.0544072541548348
51	Arsenite	E9	6	276.863651182711	-0.288110001955817	0.108764494533621	0.044402918956517
1	Arsenite	F1	6	3.79013109941831	0	0.0727012806168145	0.0296801735263481
2	Arsenite	F1	6	7.52239273731497	0.0617808484464883	0.189235125327651	0.0772549164107283
3	Arsenite	F1	5	11.6500688709194	-0.121458331736217	0.108272490442016	0.048420929744309
4	Arsenite	F1	5	15.5262975618165	-0.0638286290323947	0.0788549183738319	0.035264991568817
5	Arsenite	F1	5	20.0098254039212	-0.151906977463417	0.0713159804049705	0.0318934760135114
6	Arsenite	F1	6	24.4971872300126	-0.138836507642617	0.212103455199876	0.0865908729868279
8	Arsenite	F1	6	34.7385201921179	-0.340847188262717	0.120541162539904	0.0492107235374426
10	Arsenite	F1	6	45.6460335573715	-0.374720788028383	0.0874906761436841	0.0357179189671865
13	Arsenite	F1	6	63.6956848700682	-0.528475601346883	0.104102024727627	0.0424994736288805
16	Arsenite	F1	5	80.1828364366815	-0.374951595719917	0.0674651511887349	0.0301713328340624
21	Arsenite	F1	6	109.844958936705	-0.496002832482883	0.132416781330748	0.0540589246070052
26	Arsenite	F1	6	139.455981128583	-0.420304130258217	0.137841560011046	0.0562735812293814
31	Arsenite	F1	5	169.544929506626	-0.572471712425317	0.120091364817387	0.0537064910484808
36	Arsenite	F1	5	198.277417376355	-0.422921145947117	0.0770633705009302	0.0344637870030664
41	Arsenite	F1	6	224.829878118765	-0.38511210645955	0.111406676354414	0.0454815851679506
46	Arsenite	F1	6	250.615730575842	-0.372436754131217	0.0853157215985353	0.0348299974922929
51	Arsenite	F1	6	275.887362994372	-0.32756439890555	0.136434258353537	0.0556990527335365
1	Arsenite	F10	6	3.56776036865789	0	0.147382412249454	0.0601686178452798
2	Arsenite	F10	6	7.31799041193494	0.000242392410893334	0.107199864557772	0.0437641614436679
3	Arsenite	F10	5	11.3412821092389	-0.11913486650749	0.191129988243745	0.08547592925035
4	Arsenite	F10	5	14.8454672319365	0.00303519798075001	0.0306820016474665	0.0137214082738991
5	Arsenite	F10	4	20.8755854404095	-0.55727896312626	0.240513012610531	0.120256506305266
6	Arsenite	F10	6	25.6476808066929	-0.250041811143177	0.137543175551496	0.0561517662838692
8	Arsenite	F10	6	34.6744397664353	-0.242436618663843	0.12173076324714	0.0496963759925063
10	Arsenite	F10	5	43.8707014299025	-0.23105214104331	0.130945463953359	0.0585605917489919
13	Arsenite	F10	6	57.7107819730939	-0.35116401028096	0.203636523170916	0.0831342624605312
16	Arsenite	F10	5	71.7919157429066	-0.43276477042451	0.233042559199885	0.104219800804293
21	Arsenite	F10	3	99.0621071528151	-0.448321582796177	0.226403907164502	0.130714356747009
26	Arsenite	F10	5	130.426019437091	-0.61526828098371	0.154855141573141	0.0692533246445794
31	Arsenite	F10	5	164.070139670439	-0.68405633149511	0.144362941497383	0.0645610701239949
36	Arsenite	F10	5	197.956788833659	-0.55370815423711	0.117286085823132	0.0524519321430796
41	Arsenite	F10	6	230.517551205162	-0.547114616865343	0.140598378022996	0.0573990474698801
46	Arsenite	F10	5	260.171367363307	-0.49990185352651	0.152657347224215	0.0682704411316267
51	Arsenite	F10	6	286.883632109848	-0.253497434588177	0.132699855549303	0.0541744891728044
1	Arsenite	F11	6	3.0706156828597	0	0.124853490794555	0.0509712241753227
2	Arsenite	F11	6	6.863547776674	-0.13285405235045	0.191238015234992	0.0780725927913876
3	Arsenite	F11	5	11.5226744454963	-0.431006878935733	0.270385704537272	0.120920163097903
4	Arsenite	F11	5	14.6279194958713	0.0509088160362667	0.0865892102689888	0.0387238720558964
5	Arsenite	F11	5	19.3689353551654	-0.455871052246133	0.202922786117962	0.0907498287886828
6	Arsenite	F11	6	23.7568264850289	-0.195851789424433	0.142912897356434	0.0583439460310017
8	Arsenite	F11	6	31.4033462206304	-0.06737185329065	0.164387915584363	0.0671110855102338
10	Arsenite	F11	6	38.9636461170508	-0.0433870173729633	0.130038917145196	0.0530881656182983
13	Arsenite	F11	6	51.6235817856417	-0.25993496463525	0.274252179341332	0.111962983372087
16	Arsenite	F11	5	63.8231196177981	-0.317727627480313	0.198196481083629	0.0886361609208489
21	Arsenite	F11	6	86.7158339776507	-0.2897793223239	0.255733125907718	0.104402611466806
26	Arsenite	F11	6	111.314559913019	-0.3419565430149	0.244426917845778	0.0997868713538898
31	Arsenite	F11	5	135.405140990108	-0.365947647164833	0.280823677419527	0.125588166480307
36	Arsenite	F11	5	159.410632279713	-0.330913437835733	0.122622331551399	0.0548383737816892
41	Arsenite	F11	6	183.489244828715	-0.348657964344567	0.180443684434103	0.0736658256952232
46	Arsenite	F11	6	207.47392454335	-0.451987033096567	0.249762963031178	0.101965302678667
51	Arsenite	F11	6	231.642268460605	-0.3630238589934	0.256722664370922	0.104806588852757
1	Arsenite	F12	6	2.85207333030943	0	0.11478600047023	0.0468611884611555
2	Arsenite	F12	6	6.06337193920833	0.000796019744000002	0.111692895283473	0.0455984335564371
3	Arsenite	F12	5	9.52569063414495	-0.0519606914643733	0.0761835005375578	0.0340702971931742
4	Arsenite	F12	5	12.6318051367226	-0.00836027906521934	0.114143320391566	0.0510464447146161
5	Arsenite	F12	5	17.0338915645603	-0.573680102050533	0.307931735643189	0.137711258665533
6	Arsenite	F12	6	21.2982344249861	-0.285869442564833	0.215374801489293	0.0879263945169978
8	Arsenite	F12	6	30.4390230728801	-0.5624467528077	0.205345555656229	0.0838319720510074
10	Arsenite	F12	6	40.8258858915105	-0.561561558557367	0.229960482500825	0.093880973855207
13	Arsenite	F12	6	57.5878435822625	-0.6552571620892	0.263433080949627	0.107546104949314
16	Arsenite	F12	5	75.2232979003031	-0.957050007277933	0.190113657748093	0.085021412435173
21	Arsenite	F12	6	106.885928258591	-0.780558200035367	0.305609272776943	0.124764463161091
26	Arsenite	F12	6	139.98987473612	-0.8809517657252	0.329326718555825	0.134447069854489
31	Arsenite	F12	5	172.804220682528	-0.871480251094533	0.198799820637428	0.0889059825720108
36	Arsenite	F12	5	205.128859683338	-0.851569555434533	0.172140140187917	0.0769834110233052
41	Arsenite	F12	6	236.236267897198	-0.765239581128367	0.279738375709516	0.114202713660548
46	Arsenite	F12	6	262.423744445758	-0.540672656778367	0.267411451182029	0.109170267795524
51	Arsenite	F12	6	285.879537927644	-0.4676507305822	0.246471939694878	0.100621748027746
1	Arsenite	F2	6	3.66499134472747	0	0.0398338136962822	0.0162620863441632
2	Arsenite	F2	6	7.71623924401848	-0.0765817162363617	0.0655818346619014	0.026773671886205
3	Arsenite	F2	5	12.3892098296319	-0.267311537891112	0.0812468712176309	0.0363347054003587
4	Arsenite	F2	5	16.2340631399589	-0.0249341330650117	0.0467238670787019	0.0208955485919284
5	Arsenite	F2	5	21.179623712514	-0.352493209723112	0.0304593578094776	0.0136218389225962
6	Arsenite	F2	6	26.0495625925391	-0.301800830911778	0.13574633617386	0.0554182096797111
8	Arsenite	F2	6	35.5807432593503	-0.295215688886445	0.147506594329696	0.0602193149672448
10	Arsenite	F2	6	45.5036137606733	-0.301789895773945	0.0846497575300371	0.0345581187998182
13	Arsenite	F2	6	60.9464539345221	-0.344400763110945	0.107228352413393	0.0437757915620242
16	Arsenite	F2	5	78.0891040563832	-0.539160057012112	0.0708016721049076	0.0316634703494448
21	Arsenite	F2	6	109.610839861248	-0.534985986121945	0.170026214258876	0.0694129113052286
26	Arsenite	F2	5	141.950276198166	-0.547934072373912	0.176891465802225	0.0791082684346708
31	Arsenite	F2	4	174.93196084029	-0.611762317908112	0.0486175476337782	0.0243087738168891
36	Arsenite	F2	5	204.708752667327	-0.426703874149112	0.15455793896664	0.069120411598334
41	Arsenite	F2	6	232.257797040735	-0.353094417543612	0.211965558554676	0.0865345769171642
46	Arsenite	F2	6	257.827760263651	-0.265613170869778	0.103127274033403	0.0421015333243349
51	Arsenite	F2	6	281.931301495734	-0.218085174833695	0.105198044310384	0.042946921749856
1	Arsenite	F3	6	4.12878318837049	0	0.102281191718156	0.0417561216655438
2	Arsenite	F3	6	8.89216726496463	-0.0886119597692833	0.0976486907053689	0.0398649110465014
3	Arsenite	F3	5	13.7454387851297	-0.203714884651383	0.124992491085587	0.0558983413488817
4	Arsenite	F3	5	17.8398345129711	-0.0365690721043633	0.0833699077709093	0.0372841562107282
5	Arsenite	F3	5	22.7586338587852	-0.264417713357783	0.099277060892399	0.044398051352358
6	Arsenite	F3	6	27.777992320261	-0.184514447031617	0.11890120377234	0.0485412131741531
8	Arsenite	F3	6	37.8025257801409	-0.202871848256117	0.137681225320404	0.056208124866025
10	Arsenite	F3	4	48.8406612997938	-0.233150875195283	0.149509223049813	0.0747546115249065
13	Arsenite	F3	3	66.9653346591133	-0.383576029828117	0.0863504621087677	0.0498544625431456
16	Arsenite	F3	5	84.5454075193555	-0.411436239416183	0.0511833553392039	0.0228898923709973
21	Arsenite	F3	6	111.027137645404	-0.19179572586945	0.0736063962320885	0.0300496854289558
26	Arsenite	F3	6	138.101601064429	-0.30709990968395	0.103841632858204	0.0423931690933381
31	Arsenite	F3	5	163.630921409178	-0.190896914632983	0.0410271876645114	0.0183479161086977
36	Arsenite	F3	5	187.211549357426	-0.188059239766583	0.0557231869777868	0.0249201668010525
41	Arsenite	F3	6	211.417168522136	-0.205506896349933	0.128722678467704	0.0525508134283698
46	Arsenite	F3	6	235.831436488257	-0.175350149588383	0.159504091516574	0.065117272683633
51	Arsenite	F3	6	260.428100152336	-0.142088229249867	0.135207442623488	0.0551982073090298
1	Arsenite	F4	6	4.01740140200526	0	0.0432782998445308	0.0176682919257122
2	Arsenite	F4	6	8.36303476191963	-0.0473238519019933	0.0857046169254455	0.0349887633446734
3	Arsenite	F4	5	12.9942485471147	-0.170830003638077	0.0341467629896546	0.0152708966512883
4	Arsenite	F4	5	16.9518774149079	0.0444894390260153	0.0649430853685154	0.0290434307105145
5	Arsenite	F4	5	21.1055774053172	-0.0891197949079366	0.129907278161797	0.0580963009483502
6	Arsenite	F4	6	26.1417452029688	-0.164546210882343	0.119436187722043	0.0487596194570453
8	Arsenite	F4	6	36.159157457653	-0.26024883450301	0.155896614009847	0.0636445261586248
10	Arsenite	F4	6	46.4243033156904	-0.278582252402177	0.108894619476833	0.0444560422421299
13	Arsenite	F4	6	63.2450027638888	-0.433322431060343	0.0990817385126571	0.0404499503639798
16	Arsenite	F4	5	80.8255570587936	-0.473823632856677	0.0825514752512506	0.0369181420609376
21	Arsenite	F4	6	110.699534159729	-0.422441258934843	0.0920714102017696	0.0375879958154695
26	Arsenite	F4	6	141.18442692216	-0.42252753652001	0.0512329521735919	0.0209157651402858
31	Arsenite	F4	5	170.91164015003	-0.477668211278677	0.0894676143207379	0.0400111334811807
36	Arsenite	F4	5	199.900307428751	-0.480286031080077	0.0388897282706415	0.0173920152079299
41	Arsenite	F4	6	229.411715457793	-0.494133702396177	0.1065387103882	0.0434942463842074
46	Arsenite	F4	6	259.336930684598	-0.457333422934177	0.114101609294707	0.0465817869337399
51	Arsenite	F4	6	289.437482245122	-0.44880225058151	0.130032628286848	0.0530855982026286
1	Arsenite	F5	6	4.14920277552346	0	0.0860355646548142	0.035123872189421
2	Arsenite	F5	6	8.454113068874	-0.028253193915622	0.111963511399743	0.0457089121232763
3	Arsenite	F5	5	13.5979128609708	-0.33330656176485	0.123812684448503	0.0553707157807168
4	Arsenite	F5	5	17.6411932619473	0.007669172683414	0.0526284729307781	0.0235361686050455
5	Arsenite	F5	5	22.5799454705277	-0.22794078354125	0.116798232738698	0.0522337576111139
6	Arsenite	F5	6	27.8302621344282	-0.281706221377183	0.131285260586673	0.0535969831976119
8	Arsenite	F5	6	37.6937275344055	-0.16801529452885	0.0500007271684041	0.020412711388451
10	Arsenite	F5	6	48.2037289927352	-0.344753732942017	0.112389862510558	0.045882969235404
13	Arsenite	F5	4	64.0864282953815	-0.32163654394385	0.12206810963995	0.0610340548199752
16	Arsenite	F5	1	82.8393095755036	-0.51625880944185	NA	NA
21	Arsenite	F5	6	113.375031182964	-0.394344302217017	0.0556921244902023	0.0227362146154257
26	Arsenite	F5	6	142.496205873554	-0.470541701927517	0.176694223158255	0.0721351145391978
31	Arsenite	F5	5	169.823012817154	-0.36481715036285	0.0990361947261544	0.0442903327281175
36	Arsenite	F5	5	196.117993291696	-0.35978591709565	0.098172012183511	0.0439038585460536
41	Arsenite	F5	6	222.795695024462	-0.346076030781183	0.133824437176102	0.0546335976994325
46	Arsenite	F5	6	249.08864918937	-0.302788425484517	0.0884243883046197	0.0360991053606738
51	Arsenite	F5	6	275.55397316578	-0.26378143198135	0.106973750178582	0.0436718506349146
1	Arsenite	F6	6	4.35977565747439	0	0.060973832889053	0.0248924630399852
2	Arsenite	F6	6	8.96163538952914	0.00510573057310333	0.17215312514687	0.0702812190392212
3	Arsenite	F6	5	14.8558187946585	-0.468648323839275	0.10811483983391	0.0483504262490251
4	Arsenite	F6	5	18.7349506417844	0.115052279821965	0.0657591434902399	0.0294083829972678
5	Arsenite	F6	5	23.4837003516797	-0.131480836201655	0.141663971267227	0.0633540539432192
6	Arsenite	F6	6	28.7831352229218	-0.139509783247008	0.0890934907296527	0.0363722652818387
8	Arsenite	F6	6	38.8218129380655	-0.131861325174092	0.14297498841855	0.0583692946009638
10	Arsenite	F6	6	48.49539773003	-0.039433536672275	0.128104722681226	0.0522985340349577
13	Arsenite	F6	6	64.1665297818496	-0.17866729595188	0.20121602844355	0.0821460996260075
16	Arsenite	F6	2	83.429426129483	-0.631551668209675	0.00101544087414229	0.000718025128000011
21	Arsenite	F6	4	118.988105854864	-0.535277750540675	0.195928919480979	0.0979644597404894
26	Arsenite	F6	4	154.192369354636	-0.478606878974675	0.069016806789128	0.034508403394564
31	Arsenite	F6	3	188.395916336895	-0.526750907769675	0.0838590839567864	0.048416064696446
36	Arsenite	F6	5	218.482983253342	-0.364023556826075	0.115919721636526	0.0518408755024252
41	Arsenite	F6	6	246.106777612995	-0.322853138661008	0.132490130070479	0.0540888691046078
46	Arsenite	F6	6	273.521992815135	-0.322619005630842	0.104241731587351	0.0425565087155289
51	Arsenite	F6	6	301.77950084427	-0.340704625196342	0.118099639495993	0.0482139759286376
1	Arsenite	F7	6	4.30631960304752	0	0.110873232989474	0.0452638078261542
2	Arsenite	F7	6	8.50112051231051	0.0248302758791167	0.11677171645102	0.0476718536156599
3	Arsenite	F7	5	13.1601854802467	-0.09968005931738	0.0992483021468132	0.0443851900503425
4	Arsenite	F7	5	17.7259685877283	-0.05300630549606	0.129947731656047	0.0581143923009643
5	Arsenite	F7	5	23.6138427945003	-0.4018939360403	0.110008908856354	0.0491974796666773
6	Arsenite	F7	6	29.3781896543639	-0.3376120068483	0.0877021203100656	0.0358042406866403
8	Arsenite	F7	6	40.1431011759532	-0.250968217986467	0.0855077983963146	0.0349084125166241
10	Arsenite	F7	6	51.0489078329847	-0.257461847882133	0.0885613256575232	0.0361550098008973
13	Arsenite	F7	6	67.757391313075	-0.2120977976503	0.06771848177888	0.027645954419036
16	Arsenite	F7	4	86.0648540743843	-0.47440885907705	0.0515214764695534	0.0257607382347767
21	Arsenite	F7	4	117.236886986401	-0.35570044370405	0.431338676163482	0.215669338081741
26	Arsenite	F7	6	148.063860896167	-0.430660058367633	0.0738802531426078	0.0301614870445071
31	Arsenite	F7	5	176.633287616165	-0.3159106250569	0.111004262669484	0.0496426154242416
36	Arsenite	F7	5	204.436702303653	-0.3610607728343	0.172376992348211	0.077089334529512
41	Arsenite	F7	6	232.469259667606	-0.3266267115328	0.105349875399768	0.0430089065325364
46	Arsenite	F7	6	259.647181756999	-0.2497644314958	0.102761806300418	0.0419523317471245
51	Arsenite	F7	6	287.135189695531	-0.296942800115967	0.083499124674674	0.0340883749036646
1	Arsenite	F8	6	3.7993326060006	0	0.0941137505166468	0.0384217777575636
2	Arsenite	F8	6	9.47097612621251	-0.431961486411553	0.124414403389027	0.0507919674926516
3	Arsenite	F8	5	14.3304052086086	-0.23655231243542	0.181472293420013	0.0811568768239876
4	Arsenite	F8	5	18.5207976152433	-0.03677124631558	0.0828776134514672	0.0370639954980863
5	Arsenite	F8	5	23.5458984401631	-0.36404354653262	0.0853750312822869	0.0381808747056729
6	Arsenite	F8	6	29.0988074595935	-0.31091222808312	0.256123115905496	0.104561824216697
8	Arsenite	F8	6	39.1747198421731	-0.29749005709322	0.134242843607329	0.0548044114096997
10	Arsenite	F8	6	49.6124070904683	-0.425962061454053	0.151219071626009	0.0617349274768507
13	Arsenite	F8	6	66.1432032662831	-0.51946947188222	0.137496794772944	0.0561328314103148
16	Arsenite	F8	5	82.5102028874995	-0.47747850611462	0.0867936162565549	0.0388152851925375
21	Arsenite	F8	6	111.964836262889	-0.470190965190387	0.195951967651063	0.0799970558065767
26	Arsenite	F8	6	142.930751236036	-0.533057031848553	0.17988326468849	0.0734370352921347
31	Arsenite	F8	5	173.614539328589	-0.51333814888182	0.132657582370868	0.0593262743824077
36	Arsenite	F8	5	203.596107236351	-0.50592396378302	0.16167983341676	0.0723054196221436
41	Arsenite	F8	6	234.307167029813	-0.53357898051272	0.139140586067718	0.0568039063962858
46	Arsenite	F8	6	265.31748118083	-0.587034253577887	0.186127121001297	0.0759860789577401
51	Arsenite	F8	6	294.887841960178	-0.498856097924053	0.139554096336359	0.0569727212565478
1	Arsenite	F9	6	3.90777479024628	0	0.105177815081258	0.0429386632016481
2	Arsenite	F9	6	8.35120001098699	-0.147569952165289	0.101862513866409	0.041585197148313
3	Arsenite	F9	5	13.0088012327788	-0.178144113780296	0.138574457050371	0.061972381181951
4	Arsenite	F9	5	16.596681224313	0.0625762359478442	0.0920623810088122	0.0411715484212379
5	Arsenite	F9	5	21.4988720714713	-0.305225769901856	0.112185882173014	0.0501710517309282
6	Arsenite	F9	6	26.5959010505475	-0.237370897945689	0.118223235205419	0.0482644336657196
8	Arsenite	F9	6	37.1202875270756	-0.372329193607022	0.204195066468799	0.083362286807042
10	Arsenite	F9	6	46.8938366099144	-0.187941765611156	0.100808519765106	0.0411549058582972
13	Arsenite	F9	3	64.7476056725414	-0.544034820170523	0.23540303897378	0.135910007919568
16	Arsenite	F9	4	84.5691420648491	-0.673894201186856	0.0771549313837024	0.0385774656918512
21	Arsenite	F9	5	117.731315725029	-0.527760212647456	0.151322879216687	0.0676736488959003
26	Arsenite	F9	6	146.465500039525	-0.379202054473189	0.129519046219799	0.0528759292017428
31	Arsenite	F9	5	172.133671291303	-0.290308769029256	0.0619039817245959	0.0276843022428202
36	Arsenite	F9	5	197.725832234408	-0.307028857064856	0.0751738907402984	0.0336187859656898
41	Arsenite	F9	6	223.768573762879	-0.306226647797023	0.1532317934803	0.0625566177330441
46	Arsenite	F9	6	249.781848796576	-0.308072472250022	0.108097340775461	0.0441305545752715
51	Arsenite	F9	6	275.759648397109	-0.254989961704289	0.112635831668655	0.0459833857237039
1	Arsenite	G1	6	3.67795749603883	0	0.145659452090024	0.0594652223056552
2	Arsenite	G1	6	8.11551198702965	-0.2268320961389	0.0946821649319744	0.0386538319708961
3	Arsenite	G1	5	12.5363320728516	-0.26572171289685	0.0162803724199326	0.00728080388599642
4	Arsenite	G1	5	16.704328143583	-0.18772489129681	0.0487807287152997	0.0218154050798772
5	Arsenite	G1	5	21.7256281382984	-0.34435066099645	0.111352912414934	0.0497985363304747
6	Arsenite	G1	6	26.2583668804782	-0.12482213258675	0.255924174890527	0.104480606887432
8	Arsenite	G1	6	34.8059945488983	-0.0484827663184667	0.155304253916353	0.0634026961631168
10	Arsenite	G1	6	43.6081202170724	-0.150493016044983	0.0953718933147395	0.0389354124040443
13	Arsenite	G1	6	57.9494970485673	-0.287575622139917	0.0624771320431925	0.0255061823497184
16	Arsenite	G1	5	72.3656411000972	-0.26014804686055	0.0921390528578212	0.0412058371145069
21	Arsenite	G1	6	96.6837976641124	-0.261175568325917	0.0520450542723518	0.0212473044337866
26	Arsenite	G1	6	121.249734389407	-0.310164642836917	0.0641772632725694	0.0262002580176757
31	Arsenite	G1	5	145.303590601041	-0.26486353916345	0.0485641134090695	0.0217185317699377
36	Arsenite	G1	5	169.879877313185	-0.27551620200405	0.0730354091619048	0.032662427930106
41	Arsenite	G1	6	194.710707198973	-0.225827279229033	0.0566990797199872	0.0231473023665591
46	Arsenite	G1	6	219.083389026061	-0.291533761994417	0.0258828651036811	0.0105666354308846
51	Arsenite	G1	6	243.370787647761	-0.260309470175083	0.081932786831327	0.0334489201568293
1	Arsenite	G10	6	3.32703202409668	0	0.0884012775257579	0.0360896704247122
2	Arsenite	G10	6	6.92110568300585	-0.0131941542086633	0.0431530511425332	0.0176171593572388
3	Arsenite	G10	5	11.2685369342568	-0.30938238925413	0.223750558379676	0.100064291708098
4	Arsenite	G10	5	14.3193308294417	0.15752201376221	0.0359294086002547	0.016068120004307
5	Arsenite	G10	5	19.783691390428	-0.48027525699553	0.134579689943214	0.0601858670207741
6	Arsenite	G10	6	24.2757956373877	-0.243144763996413	0.176203651797708	0.071934839619904
8	Arsenite	G10	6	34.076847369058	-0.32528627164333	0.145593670322258	0.0594383670114211
10	Arsenite	G10	6	45.9205122685726	-0.596124355018497	0.203924318787134	0.0832517545288554
13	Arsenite	G10	6	64.6704114751649	-0.67068918525533	0.15291326980094	0.0624265809854733
16	Arsenite	G10	5	84.3841294968459	-0.81884967167593	0.237223657696734	0.106089644896208
21	Arsenite	G10	6	114.765345189675	-0.451469052138997	0.135719885133379	0.055407411087654
26	Arsenite	G10	6	140.640897107141	-0.294213071333997	0.117657031667796	0.0480332820394301
31	Arsenite	G10	5	164.668977088492	-0.33308662367253	0.127608025730382	0.0570680440015354
36	Arsenite	G10	5	188.367859412013	-0.32840834787793	0.124354558352571	0.0556130491576625
41	Arsenite	G10	6	212.083309058223	-0.311750952344663	0.107216074337467	0.0437707790585174
46	Arsenite	G10	6	235.711165962894	-0.30103267227933	0.185262673083212	0.075633169572987
51	Arsenite	G10	6	259.641043066188	-0.293980859284163	0.165465996522449	0.0675512102101894
1	Arsenite	G11	6	3.18869975369041	0	0.106435518967694	0.043452118663195
2	Arsenite	G11	6	7.03642934810086	-0.137020111958532	0.210763214726012	0.0860437221045625
3	Arsenite	G11	5	11.2130938126908	-0.319649543798415	0.23834531274154	0.106591264281706
4	Arsenite	G11	5	14.0430506174296	0.234058671524685	0.101098153115668	0.0452124685532633
5	Arsenite	G11	4	19.088368532832	-0.517023419531915	0.194742601694155	0.0973713008470774
6	Arsenite	G11	6	23.8373504501022	-0.383165480881415	0.110501252019948	0.0451119472312603
8	Arsenite	G11	6	33.119457846887	-0.317050519120582	0.0821955426762922	0.0335561897813458
10	Arsenite	G11	6	41.182678669937	0.00906861458805167	0.214242328743748	0.087464064454632
13	Arsenite	G11	6	54.1930117825002	-0.263609971504415	0.17156745943798	0.0700421220147836
16	Arsenite	G11	5	67.6688751804188	-0.356937913038215	0.204157111903906	0.091301836061433
21	Arsenite	G11	6	90.5287203741179	-0.241133624386415	0.148991641456098	0.0608255829178568
26	Arsenite	G11	6	113.594699871501	-0.294594997749415	0.182748950806976	0.0746069467510127
31	Arsenite	G11	5	136.563863409625	-0.340770032170415	0.172117847834976	0.0769734415799942
36	Arsenite	G11	5	159.215163066445	-0.249365963740815	0.136791210947596	0.0611748892806678
41	Arsenite	G11	6	182.006825318446	-0.303999338546248	0.202550072284418	0.0826907207434454
46	Arsenite	G11	6	204.507811300118	-0.311384848493248	0.178606680590287	0.07291587201641
51	Arsenite	G11	6	227.170118695646	-0.285815596068415	0.233269438975449	0.0952318496791915
1	Arsenite	G12	6	2.73422675398771	0	0.0407402562763434	0.0166321399778769
2	Arsenite	G12	6	6.05540905495838	-0.101001812979148	0.0752575913093861	0.030723782996485
3	Arsenite	G12	5	9.79839807907414	-0.242749790376085	0.151057156776388	0.0675548142079693
4	Arsenite	G12	5	12.8955181899802	-0.042373242755005	0.0641229737199619	0.0286766656314535
5	Arsenite	G12	5	17.5231270082652	-0.624715841949965	0.33295923816458	0.148903898054509
6	Arsenite	G12	6	21.5103110285873	-0.115384693190082	0.19032882123858	0.0777014158966523
8	Arsenite	G12	6	28.2804703990978	-0.065743425020865	0.193442811189016	0.0789726969704398
10	Arsenite	G12	6	35.6340537366396	-0.0894097969231817	0.142671895120192	0.058245557280058
13	Arsenite	G12	6	47.6414473498293	-0.125220417298098	0.150196916579275	0.0613176344264326
16	Arsenite	G12	5	59.8373573144691	-0.584664140081765	0.194115773426915	0.0868112129775059
21	Arsenite	G12	6	81.9300214430275	-0.508557657176498	0.263953416713951	0.107758531135566
26	Arsenite	G12	6	103.797314886399	-0.426862450668498	0.3013133124972	0.123010644720986
31	Arsenite	G12	5	126.84775409577	-0.595236634407965	0.260031968429365	0.116289831546228
36	Arsenite	G12	5	150.771111885749	-0.651880991243565	0.266836569114455	0.119332941484549
41	Arsenite	G12	6	177.342607644443	-0.756772205183498	0.222251531534373	0.0907338078018832
46	Arsenite	G12	6	204.857030866772	-0.837913017111498	0.300703753706531	0.122761793386758
51	Arsenite	G12	6	231.150402020845	-0.685420997971332	0.325524528393596	0.132894832220741
1	Arsenite	G2	6	3.64330592627895	0	0.0599391549074244	0.0244700575228047
2	Arsenite	G2	6	7.75972854295339	-0.0972499730243833	0.0495002116692739	0.0202083767915804
3	Arsenite	G2	5	12.4846178038017	-0.277519453057367	0.0638425186523694	0.0285512423122992
4	Arsenite	G2	5	16.1226179414838	0.0250440909814533	0.042991077322353	0.0192261942637462
5	Arsenite	G2	5	19.9130921398418	-0.0553091919169667	0.0644540058038338	0.0288247076799077
6	Arsenite	G2	6	23.8705399681	-0.00120497083241667	0.0810150865497765	0.0330742705857282
8	Arsenite	G2	6	32.2943365884528	-0.18357707370695	0.0993759656773494	0.0405700681009734
10	Arsenite	G2	6	41.1530663245094	-0.141854666384383	0.0995609619867425	0.0406455925280253
13	Arsenite	G2	6	54.7517285677824	-0.2176398093776	0.0573661597564181	0.0234196366510345
16	Arsenite	G2	5	68.7028542782308	-0.278098309651567	0.065513489994879	0.0292985234143604
21	Arsenite	G2	6	92.3986988399076	-0.210986514345217	0.114306123073227	0.0466652793341968
26	Arsenite	G2	6	116.265209274055	-0.2358051292641	0.0977907971293053	0.0399229257511374
31	Arsenite	G2	5	139.644878234883	-0.279695065353967	0.0550971534404186	0.0246401960919025
36	Arsenite	G2	5	162.883647163831	-0.253588395432167	0.0752839207755321	0.0336679928933597
41	Arsenite	G2	6	186.536764532385	-0.248151441942267	0.039147074800533	0.0159817263639786
46	Arsenite	G2	6	210.236590989357	-0.2765142518911	0.0673203105069466	0.0274834016779574
51	Arsenite	G2	6	234.051896081004	-0.2226414702671	0.109233759819782	0.0445944957073663
1	Arsenite	G3	6	3.82757432194744	0	0.114341402302964	0.0466796820194257
2	Arsenite	G3	6	8.87263129453357	-0.252376929634133	0.0745503622855045	0.0304350579565188
3	Arsenite	G3	5	13.093568995562	-0.149120056538467	0.0950694031061449	0.0425163295851339
4	Arsenite	G3	5	17.0081912490862	-0.0601538515348667	0.0495989653698552	0.0221813316361308
5	Arsenite	G3	5	21.0511614699072	-0.0910714245020867	0.0786258791371359	0.0351625621082637
6	Arsenite	G3	6	25.5366241843133	-0.218021483727467	0.10288156010179	0.0420012210318108
8	Arsenite	G3	6	34.7864738732108	-0.2497993576638	0.0598142674626797	0.0244190724369872
10	Arsenite	G3	6	44.6817049927	-0.261276917644467	0.118901077720067	0.0485411617135282
13	Arsenite	G3	6	58.9757675808024	-0.245617852222633	0.0966335569042187	0.0394504844075897
16	Arsenite	G3	5	73.0857946288442	-0.335797557398667	0.104399964593006	0.0466890835357066
21	Arsenite	G3	6	101.688508917824	-0.543633389632133	0.137156821034147	0.0559940377126486
26	Arsenite	G3	5	129.965886896618	-0.320548860786267	0.0788269465508454	0.0352524821892866
31	Arsenite	G3	5	157.842631190315	-0.507414324561067	0.158528710040464	0.0708961944071661
36	Arsenite	G3	5	185.098140900232	-0.368460533727867	0.0722490978159183	0.032310778805885
41	Arsenite	G3	6	210.828934228987	-0.300095843851133	0.159645080866114	0.0651748313445562
46	Arsenite	G3	6	235.645104615718	-0.29192459866755	0.176161825666711	0.071917764173428
51	Arsenite	G3	6	260.266198977414	-0.27328614672325	0.147749054266048	0.0603182988217665
1	Arsenite	G4	6	3.73262842430016	0	0.0514907803808927	0.0210210230651497
2	Arsenite	G4	6	7.74356611215252	-0.0257601663643167	0.0762564588344941	0.0311315689560102
3	Arsenite	G4	5	12.521470078561	-0.252803916509557	0.130231042223564	0.0582410926385069
4	Arsenite	G4	5	16.5759425550188	-0.0996784084755367	0.0772586111676618	0.0345511012836232
5	Arsenite	G4	5	21.8064880839751	-0.422397982443517	0.0884639236106213	0.0395622693499396
6	Arsenite	G4	6	26.4232004217866	-0.25917988007045	0.0869681428193728	0.035504595630826
8	Arsenite	G4	6	35.2596324552556	-0.21598347380745	0.0697980270938919	0.0284949252388318
10	Arsenite	G4	6	45.0384841941419	-0.351310363283617	0.100627784272321	0.0410811209023415
13	Arsenite	G4	6	59.7096460881476	-0.213210820511283	0.170084387437344	0.069436660405889
16	Arsenite	G4	5	74.6642852293129	-0.367904987190717	0.0626882146801055	0.0280350218825632
21	Arsenite	G4	6	99.8733418681017	-0.3024790807554	0.137395319125164	0.056091404150585
26	Arsenite	G4	6	125.92738304665	-0.39457141127095	0.130267590732834	0.0531815212195254
31	Arsenite	G4	5	151.765191602332	-0.370259872432117	0.0496086657035143	0.0221856697572241
36	Arsenite	G4	5	177.051219425395	-0.340941872237517	0.0859581548491408	0.0384416554926264
41	Arsenite	G4	6	202.177846222373	-0.303234665786117	0.126043023375309	0.0514568488178665
46	Arsenite	G4	6	227.439437239248	-0.344448108910617	0.134503134646946	0.0549106747816465
51	Arsenite	G4	6	253.122585439961	-0.347864618291283	0.123113567830484	0.050260903599702
1	Arsenite	G5	6	3.82387949878696	0	0.0630411548656795	0.0257364437027813
2	Arsenite	G5	6	8.09249646228833	-0.09459252731575	0.120513088913889	0.0491992625276149
3	Arsenite	G5	5	12.52128313201	-0.148974375823665	0.0869688783426031	0.038893664780194
4	Arsenite	G5	5	16.2672723683983	0.028753585613281	0.0585469853396926	0.0261830078194473
5	Arsenite	G5	5	20.4117772232885	-0.103984776696085	0.104548049342953	0.0467553090491689
6	Arsenite	G5	6	25.4186738150566	-0.253998153323772	0.135102290545479	0.0551552791529439
8	Arsenite	G5	6	35.512575983327	-0.368897981574772	0.092585341831419	0.0377978075246892
10	Arsenite	G5	6	46.1509552030243	-0.371583619501105	0.120583387961847	0.0492279619937647
13	Arsenite	G5	6	61.3749923822033	-0.269282528131438	0.134912094251633	0.0550776318411289
16	Arsenite	G5	5	77.6343046754532	-0.467933005964505	0.1436231659598	0.0642302324459692
21	Arsenite	G5	6	107.03928932376	-0.481658471279105	0.132839543816143	0.05423151666894
26	Arsenite	G5	6	135.93488163488	-0.445430105580938	0.0560623976510563	0.022887378000349
31	Arsenite	G5	5	162.251864717692	-0.382154725315305	0.0421241180718063	0.0188384783001572
36	Arsenite	G5	5	187.348897972094	-0.363260242922305	0.0210423149790992	0.00941040933944558
41	Arsenite	G5	6	212.279994178989	-0.319362300573938	0.122957420701604	0.050197156801276
46	Arsenite	G5	6	237.080577464534	-0.317294161142438	0.109357920076444	0.0446451839198921
51	Arsenite	G5	6	262.33413638855	-0.318250693998772	0.0765031317235942	0.0312322727412891
1	Arsenite	G6	6	3.89253397309829	0	0.0872519000483208	0.0356204390344508
2	Arsenite	G6	6	8.52748491485218	-0.142617772647917	0.0837962165017797	0.0342096621341913
3	Arsenite	G6	5	12.918772029893	-0.120523902416983	0.11568089403674	0.0517340685528202
4	Arsenite	G6	5	16.9617093557826	-0.0564300129278233	0.131164584067867	0.0586585852432474
5	Arsenite	G6	5	21.9257430075931	-0.431585248637383	0.0584655281876328	0.0261465790735954
6	Arsenite	G6	6	26.7582477487654	-0.261801433669917	0.111088231394673	0.0453515805575293
8	Arsenite	G6	6	36.4251773452324	-0.217970793110417	0.0875078755352239	0.0357249405893797
10	Arsenite	G6	6	46.6008238811173	-0.29869380148725	0.138532743890465	0.0565557558665505
13	Arsenite	G6	6	62.5405356953061	-0.338643696927917	0.163351455676877	0.0666879525248684
16	Arsenite	G6	4	80.6832064449246	-0.572042570176583	0.0548453339810657	0.0274226669905329
21	Arsenite	G6	4	113.243833869743	-0.606824750351833	0.0745343571819956	0.0372671785909978
26	Arsenite	G6	6	142.112611990898	-0.351119901634083	0.0647185087420006	0.0264212205552923
31	Arsenite	G6	5	171.10443047594	-0.523904914084983	0.0528874366469446	0.0236519806996563
36	Arsenite	G6	5	198.894819918075	-0.331387022775383	0.0678975437958722	0.0303647046865679
41	Arsenite	G6	6	224.49024713885	-0.315726905851083	0.150831630883634	0.0615767554561202
46	Arsenite	G6	6	249.353932563426	-0.230032300121583	0.102756549078521	0.0419501854952723
51	Arsenite	G6	6	274.181610461878	-0.166953604873417	0.0765854960553052	0.0312658978389053
1	Arsenite	G7	6	3.93003883500319	0	0.0746050249847312	0.0304573739100303
2	Arsenite	G7	6	8.40957769092731	-0.0749173297427333	0.0991920030233014	0.0404949656619491
3	Arsenite	G7	5	12.8501599165904	-0.131286443922733	0.0959305794059543	0.042901459334531
4	Arsenite	G7	5	16.8150672749935	0.0338520245136867	0.0782264447308502	0.0349839296112623
5	Arsenite	G7	5	21.9902840349287	-0.322847679732533	0.109453574650473	0.0489491266597613
6	Arsenite	G7	6	26.7121597125482	-0.148137023619017	0.165193507533974	0.067439967046474
8	Arsenite	G7	6	36.6538876998882	-0.204361614377667	0.0756057247760903	0.0308659078891202
10	Arsenite	G7	6	47.2032320945337	-0.351305206955833	0.135429281856375	0.0552887727966138
13	Arsenite	G7	2	64.9588896908165	-0.508336842298333	0.0348187597447246	0.024620581128
16	Arsenite	G7	3	79.5330159846523	-0.254148511865333	0.0977613217064998	0.0564425254035813
21	Arsenite	G7	3	107.065173913455	-0.387138139288333	0.0936199542935062	0.0540515058128763
26	Arsenite	G7	1	136.927619708534	-0.600030070527333	NA	NA
31	Arsenite	G7	2	167.852325123371	-0.613926203429333	0.0125395107838186	0.00886677310799999
36	Arsenite	G7	2	200.976005091407	-0.523897808634833	0.205342355888387	0.1451989723135
41	Arsenite	G7	4	235.496220653899	-0.649413606264333	0.080290894490327	0.0401454472451635
46	Arsenite	G7	6	267.438345826941	-0.4938906557735	0.180970380056354	0.073880848282602
51	Arsenite	G7	6	297.909627755702	-0.432946198667167	0.106960341862605	0.0436663767128387
1	Arsenite	G8	6	3.67002287910025	0	0.0763884133536567	0.0311854391628773
2	Arsenite	G8	6	7.64780390758727	-0.0697902252577783	0.134320513922929	0.0548361201832634
3	Arsenite	G8	5	11.7593987851402	-0.134824756193155	0.10273380954659	0.0459439563467385
4	Arsenite	G8	5	15.2107907386169	0.103204218770559	0.051381621245223	0.0229785595796932
5	Arsenite	G8	5	19.2759945983753	-0.121950702569313	0.102508436775376	0.045843166579396
6	Arsenite	G8	6	23.8341298419881	-0.319597191952628	0.156009333243576	0.063690543593097
8	Arsenite	G8	6	32.9726464229685	-0.250615014922212	0.13272758306974	0.0541858088856217
10	Arsenite	G8	6	42.5936570618733	-0.273259532319295	0.0966200279805534	0.0394449612476315
13	Arsenite	G8	6	57.5658949352763	-0.343832925332628	0.104859670397265	0.0428087811782876
16	Arsenite	G8	5	71.7819086824164	-0.395602286978395	0.0983609644821954	0.0439883605829263
21	Arsenite	G8	6	97.2529164596083	-0.437410127016962	0.131647118150505	0.0537447109294379
26	Arsenite	G8	6	126.006333391285	-0.606461536151128	0.135274860800684	0.0552257306646164
31	Arsenite	G8	5	154.563769818673	-0.507628604832595	0.108686097365693	0.0486059003837699
36	Arsenite	G8	5	183.113810411045	-0.619770272441195	0.191499862241449	0.0856413419307449
41	Arsenite	G8	6	212.066693389526	-0.566873187232128	0.178941781033195	0.0730526761993608
46	Arsenite	G8	6	240.893351613172	-0.553652608489128	0.165747808361917	0.0676662594118846
51	Arsenite	G8	6	269.100672885532	-0.477553286501295	0.113323036605101	0.0462639359642062
1	Arsenite	G9	6	3.57323448091163	0	0.0803033193899195	0.0327836928595082
2	Arsenite	G9	6	7.27916701288988	-0.0216777951662633	0.0530616768769151	0.0216623388741465
3	Arsenite	G9	5	10.9719275512656	-0.04073649828369	0.14755109162842	0.0659868542070893
4	Arsenite	G9	5	14.7509937460362	-0.10334978614469	0.0754713164165451	0.0337517987717581
5	Arsenite	G9	5	19.8881614436495	-0.46810105175883	0.0763450712516841	0.0341425538131661
6	Arsenite	G9	6	24.9600320227786	-0.406671024182697	0.163441017670213	0.0667245160555385
8	Arsenite	G9	6	34.3821162875007	-0.177656605338163	0.153000276688894	0.0624621013987389
10	Arsenite	G9	6	45.5534841400554	-0.466549388331013	0.316916678993963	0.12938069241877
13	Arsenite	G9	6	63.9953264576626	-0.621697850968697	0.164870348402236	0.0673080378833942
16	Arsenite	G9	5	80.9305846862002	-0.48544732811263	0.0709201353419947	0.0317164487196371
21	Arsenite	G9	6	108.133451411325	-0.36247412394153	0.098673141074456	0.0402831411583462
26	Arsenite	G9	6	134.183910237255	-0.317132900281697	0.0878549784909349	0.0358666447776636
31	Arsenite	G9	5	158.60765488366	-0.35970755255063	0.0993451664706317	0.0444285090928731
36	Arsenite	G9	5	182.722205553513	-0.31395635178483	0.0983020644388	0.0439620196827443
41	Arsenite	G9	6	206.93906747202	-0.301826433635863	0.0937383735399945	0.0382685307485658
46	Arsenite	G9	6	231.045515009941	-0.314072035845863	0.12718834492047	0.0519244243807102
51	Arsenite	G9	6	255.691782148659	-0.33286956964553	0.161887877341572	0.0660904491715205
1	Arsenite	H1	6	3.90724372404244	0	0.082113102118903	0.0335225335647268
2	Arsenite	H1	6	8.28017227697181	-0.0607476378471584	0.0760584827903787	0.0310507455744473
3	Arsenite	H1	5	13.840391162099	-0.336700179235292	0.0616019250503683	0.0275492183914941
4	Arsenite	H1	5	18.7218597951207	-0.216865141719692	0.115444604797573	0.0516283967925944
5	Arsenite	H1	5	24.0584034318103	-0.364299393430892	0.159743713998773	0.0714395606959081
6	Arsenite	H1	6	29.2356130397003	-0.237644981578725	0.122703452353965	0.0500934746575203
8	Arsenite	H1	6	39.1250256334762	-0.117286998922192	0.170073103458336	0.0694320537407493
10	Arsenite	H1	6	49.9243031935256	-0.314366176937225	0.0566416910422113	0.0231238735369651
13	Arsenite	H1	6	67.0726800390968	-0.285310743358208	0.240215516058363	0.0980675737737214
16	Arsenite	H1	5	86.567293609719	-0.671308479548692	0.0636403551509333	0.0284608320459431
21	Arsenite	H1	4	121.402130815064	-0.555110492747142	0.0929451318713745	0.0464725659356873
26	Arsenite	H1	6	150.375721142127	-0.113719691888025	0.0772985349954172	0.0315569947672402
31	Arsenite	H1	5	174.570853964049	-0.0236063634963717	0.155532992525336	0.0695564688061237
36	Arsenite	H1	5	199.351622387774	-0.122860234602032	0.0815593601695768	0.0364744547081125
41	Arsenite	H1	6	224.497716627346	-0.0983935824065083	0.0584768903058942	0.0238730904990241
46	Arsenite	H1	6	249.015653817186	-0.119949013577158	0.0523154508513196	0.0213576933748975
51	Arsenite	H1	6	272.368994316929	0.00234388244744167	0.314300612395567	0.128312687702235
1	Arsenite	H10	6	3.09423914229615	0	0.035509554407158	0.0144967148818558
2	Arsenite	H10	6	6.67938368492785	-0.0897271291206835	0.062610718623932	0.0255607188429342
3	Arsenite	H10	5	11.5099574842479	-0.434986787779317	0.211745926466915	0.0946956571077388
4	Arsenite	H10	5	15.5102264858635	-0.154518683245837	0.110904891586392	0.0495981753248833
5	Arsenite	H10	5	21.9108903691159	-0.797454837622317	0.163636389273004	0.0731804180014108
6	Arsenite	H10	6	28.4981099184969	-0.709738674392484	0.192925876968777	0.0787616594587448
8	Arsenite	H10	6	39.9954922984552	-0.483318695582817	0.172439301794515	0.070398050166393
10	Arsenite	H10	6	51.1157603366104	-0.513503153872317	0.155442425764377	0.0634591045838627
13	Arsenite	H10	6	66.5357628553744	-0.331966204375317	0.135658299285425	0.0553822687705098
16	Arsenite	H10	5	81.2553141028793	-0.456363373048317	0.05266423324167	0.0235521611022557
21	Arsenite	H10	6	105.378774367243	-0.319428350991817	0.147873210551991	0.0603689854132533
26	Arsenite	H10	6	129.345960184854	-0.31226502031865	0.184280041722781	0.0752320119999345
31	Arsenite	H10	5	153.056470529608	-0.383976567492517	0.178913946791885	0.0800127494298871
36	Arsenite	H10	5	176.68992685127	-0.389803078806717	0.138710236085725	0.0620331034125453
41	Arsenite	H10	6	200.469066028526	-0.287847165133984	0.133041946076857	0.0543141470458621
46	Arsenite	H10	6	224.287998961046	-0.38536991412715	0.0933746441437725	0.0381200388443667
51	Arsenite	H10	6	248.409039479488	-0.408662297221983	0.181255354971552	0.0739971888045568
1	Arsenite	H11	6	2.90343300723988	0	0.0982844791661679	0.0401244705987192
2	Arsenite	H11	6	6.44522901510756	-0.1308687131837	0.0820204343169899	0.0334847020930147
3	Arsenite	H11	5	10.894754620366	-0.429607435048867	0.2622369610147	0.117275934208366
4	Arsenite	H11	5	14.339172173662	-0.105952208099027	0.137653395875569	0.0615604701022924
5	Arsenite	H11	5	19.5264810981357	-0.636256281148467	0.111932593620925	0.0500577776468494
6	Arsenite	H11	6	25.1167371811521	-0.578864865712733	0.196749317938585	0.0803225726983583
8	Arsenite	H11	6	36.350152065625	-0.613884755541733	0.180070458165596	0.0735134567091491
10	Arsenite	H11	6	46.6324763261237	-0.3206841127634	0.228361335980897	0.0932281250222451
13	Arsenite	H11	6	63.9420820088768	-0.6288215593984	0.147492394772661	0.0602135180223601
16	Arsenite	H11	5	80.3572450123228	-0.562981904713867	0.125020824011697	0.0559110122186385
21	Arsenite	H11	6	108.834797584427	-0.598373841200067	0.185120096172634	0.0755749627929839
26	Arsenite	H11	6	141.730969040474	-0.818053471997567	0.256593625226445	0.104753908842621
31	Arsenite	H11	4	176.194679349981	-0.834024308152067	0.156837077313492	0.0784185386567458
36	Arsenite	H11	5	210.688559766748	-0.924147028003467	0.159411517619949	0.0712909979589221
41	Arsenite	H11	6	243.827165884765	-0.709239390491567	0.166882923479731	0.0681296682182118
46	Arsenite	H11	6	277.035601872663	-0.867168162951233	0.233907636028354	0.095492392535019
51	Arsenite	H11	6	311.18103819559	-0.812083604134067	0.290187178984537	0.118468419734968
1	Arsenite	H12	6	2.77338939019524	0	0.128746078401756	0.0525603664114433
2	Arsenite	H12	6	6.07020651453929	-0.14855893028375	0.147239018957827	0.0601100777791093
3	Arsenite	H12	5	10.1531942796619	-0.449097546081633	0.26399276143	0.118061152025073
4	Arsenite	H12	5	13.2743315414341	-0.120797757841091	0.0396389066051591	0.0177270579445802
5	Arsenite	H12	5	18.5706207501035	-0.712348043217833	0.201726808495263	0.090214971335898
6	Arsenite	H12	6	23.3177848885367	-0.312894840806903	0.189424973417919	0.0773324215690279
8	Arsenite	H12	6	32.7901636239355	-0.4072326954077	0.0905013837590948	0.0369470352042645
10	Arsenite	H12	6	41.9946780695607	-0.237424410409767	0.116406800803596	0.0475228774264355
13	Arsenite	H12	6	56.0540467190172	-0.32840287041995	0.137485206202596	0.0561281003962813
16	Arsenite	H12	5	73.059337537407	-0.916831740185033	0.176476931077091	0.0789228828697843
21	Arsenite	H12	6	101.196145761581	-0.565297740628	0.316455822822017	0.129192548674423
26	Arsenite	H12	6	131.22497228113	-0.908950545151867	0.216208126267235	0.0882665979329937
31	Arsenite	H12	5	158.479040167004	-0.521939312012233	0.244028143149033	0.109132703300857
36	Arsenite	H12	5	182.406113433369	-0.538787078820233	0.164440796292798	0.0735401597569781
41	Arsenite	H12	6	206.788647935307	-0.491067063238867	0.20843443113071	0.0850930001829201
46	Arsenite	H12	6	231.430363372553	-0.6542025251337	0.268723784932036	0.109706025805483
51	Arsenite	H12	6	255.969055548382	-0.5098010691742	0.244299311129632	0.0997347761301716
1	Arsenite	H2	6	3.63803917794761	0	0.0891541669431584	0.0363970362422742
2	Arsenite	H2	6	7.8555970271805	-0.148915039967615	0.123265294623157	0.0503228458034281
3	Arsenite	H2	5	12.0544230134818	-0.14914479555978	0.0692202633333073	0.0309562428467423
4	Arsenite	H2	5	15.887709888937	-0.03200603598541	0.0857371203612573	0.0383428058645705
5	Arsenite	H2	5	20.505064381642	-0.34419025035682	0.0943411272661583	0.0421906347282178
6	Arsenite	H2	6	25.1674014891723	-0.178558101619353	0.130089763529357	0.0531089235677082
8	Arsenite	H2	6	34.1048287439437	-0.160814684064703	0.125789951770533	0.0513535327678519
10	Arsenite	H2	6	45.2858313346904	-0.46139354147902	0.103367288824966	0.0421995189526766
13	Arsenite	H2	6	61.2361696056606	-0.255697650429687	0.0741378611857139	0.0302666550877149
16	Arsenite	H2	5	75.7207355989644	-0.27942883358462	0.0514587041766352	0.0230130321146017
21	Arsenite	H2	6	99.4087926831393	-0.215364486716353	0.0827141271452537	0.0337679010042604
26	Arsenite	H2	6	123.464538583139	-0.206494750090087	0.107143714516166	0.043741238285173
31	Arsenite	H2	5	147.284074864164	-0.21017453388002	0.066353923016502	0.0296743764877373
36	Arsenite	H2	5	170.902198354436	-0.25565744142282	0.0507237814942197	0.0226843646993842
41	Arsenite	H2	6	194.794480819695	-0.238186876146987	0.100448853403633	0.0410080726810885
46	Arsenite	H2	6	218.518751146324	-0.278104067953853	0.0812243202546461	0.0331596898880486
51	Arsenite	H2	6	242.263070071604	-0.28592725936462	0.108731432502782	0.0443894214389478
1	Arsenite	H3	6	3.65946631426812	0	0.0718162421226352	0.0293188580741047
2	Arsenite	H3	6	7.75228444882173	-0.132196021161217	0.1514699380392	0.0618373432611707
3	Arsenite	H3	5	11.997668079026	-0.215330966116797	0.103144274804462	0.0461275219905393
4	Arsenite	H3	5	15.7179730164051	-0.0106874675844567	0.0582001797382413	0.0260279116394827
5	Arsenite	H3	5	20.4949471252695	-0.285911713562617	0.0935644369502889	0.0418432882594678
6	Arsenite	H3	6	25.0981915787866	-0.186759650018383	0.0965612472006739	0.0394209640947336
8	Arsenite	H3	5	35.0541179866837	-0.305414994427617	0.148118999139554	0.0662408301670553
10	Arsenite	H3	6	45.6957693322589	-0.36679278588525	0.108543991440247	0.0443128989456051
13	Arsenite	H3	6	59.6982840114718	0.00617186615086667	0.154961118262505	0.0632626116190362
16	Arsenite	H3	5	74.003232764797	-0.338179146832217	0.129944602201176	0.0581129927661999
21	Arsenite	H3	6	98.4551193627872	-0.2295515901202	0.101381619873696	0.0413888729978934
26	Arsenite	H3	6	122.893516830347	-0.25454007982185	0.122702188352435	0.0500929586310564
31	Arsenite	H3	5	147.287864180592	-0.286471757731217	0.0677606135913449	0.0303034676374687
36	Arsenite	H3	5	171.499777474708	-0.285707978184417	0.0757738251697316	0.0338870847989409
41	Arsenite	H3	6	195.901252121713	-0.231237580869267	0.144355744257726	0.0589329858118551
46	Arsenite	H3	6	220.288839027792	-0.337306969982583	0.0718829875041445	0.0293461067620022
51	Arsenite	H3	6	244.781218426334	-0.308759252799867	0.137497487991367	0.0561331144155511
1	Arsenite	H4	6	3.57118011264999	0	0.0785467195591403	0.0320665639815635
2	Arsenite	H4	6	7.49419949841026	-0.0662131231282283	0.0545755381806635	0.0222803701634011
3	Arsenite	H4	5	11.8638027015667	-0.243154550542767	0.0540202387034976	0.0241585851803571
4	Arsenite	H4	5	15.495710214627	-0.0122964006093467	0.0953185362118151	0.0426277452970788
5	Arsenite	H4	5	20.5334830690785	-0.414263745959167	0.094695679300485	0.0423491952182808
6	Arsenite	H4	6	25.5546091939757	-0.2830165619062	0.142756653256443	0.0582801596442853
8	Arsenite	H4	6	36.6007021456713	-0.4537215464302	0.0769478543822102	0.0314138300063996
10	Arsenite	H4	6	49.5819190499289	-0.650827907806033	0.0859131082891048	0.0350738795874638
13	Arsenite	H4	6	67.977655686499	-0.5098319338077	0.133069964949191	0.0543255857025933
16	Arsenite	H4	5	84.5359143052482	-0.493273358417567	0.140915761905894	0.0630194445445509
21	Arsenite	H4	6	110.832716258981	-0.362114659302367	0.129496869867515	0.0528668757438344
26	Arsenite	H4	6	136.368477762876	-0.269292533646867	0.0667722940477323	0.0272596748953371
31	Arsenite	H4	5	161.137565447378	-0.302651435176367	0.0596280889021726	0.0266664920307318
36	Arsenite	H4	5	185.673878028993	-0.346665387340167	0.0547552443987115	0.0244872897200267
41	Arsenite	H4	6	210.528645796468	-0.261626655990367	0.0893461618023075	0.0364754178152997
46	Arsenite	H4	6	235.270627164814	-0.3384645761442	0.101795794248699	0.0415579589784424
51	Arsenite	H4	6	260.112761724534	-0.300797460885867	0.160509807654632	0.065527854577687
1	Arsenite	H5	6	3.84352045387013	0	0.146560680974006	0.0598331474568574
2	Arsenite	H5	6	7.72672602405624	-0.0266975887879383	0.108237934140598	0.0441879515762394
3	Arsenite	H5	5	11.3709417914937	0.0937782989739447	0.110296713488483	0.0493261898110133
4	Arsenite	H5	5	14.8258255949318	0.141031359166947	0.0530634873983214	0.02373071298917
5	Arsenite	H5	5	19.1828493539738	-0.216139760199913	0.0956718438680939	0.0427857492843609
6	Arsenite	H5	6	23.3461448754876	0.0285752011060533	0.135163091440877	0.0551801010145486
8	Arsenite	H5	6	31.9165422705905	-0.16218437257363	0.122370155577822	0.0499574068184429
10	Arsenite	H5	6	40.8396399623747	-0.20523784934368	0.077666127853784	0.0317070639232551
13	Arsenite	H5	6	54.9127046006613	-0.30657053093468	0.0809128635495608	0.033032538220644
16	Arsenite	H5	5	69.5025576348591	-0.441225580961713	0.0707175883931459	0.0316258669703849
21	Arsenite	H5	6	94.1737885393464	-0.39903791718518	0.0408539821938625	0.0166785683892855
26	Arsenite	H5	6	119.820748628105	-0.47068727779768	0.0872089593735119	0.0356029085773687
31	Arsenite	H5	5	145.580156068644	-0.537318571488713	0.0924696906832422	0.0413537028452217
36	Arsenite	H5	5	171.095136246399	-0.503461164878313	0.04717855006342	0.0210988890043368
41	Arsenite	H5	6	196.695475587966	-0.466738002874847	0.118289363136586	0.0482914302805704
46	Arsenite	H5	6	222.29169611979	-0.52986719804818	0.0770687556436701	0.0314631877397055
51	Arsenite	H5	6	247.963212249745	-0.498948532958013	0.0989987981212861	0.0404160900909922
1	Arsenite	H6	6	3.46860928875601	0	0.0428207417789767	0.0174814946276618
2	Arsenite	H6	6	7.80650352436782	-0.232826992958418	0.092943260445153	0.0379439271868713
3	Arsenite	H6	5	11.8212015617484	-0.179259843479698	0.103810142898781	0.0464253072551282
4	Arsenite	H6	5	15.529186263649	0.0220322696209417	0.0915470178767403	0.040941071021956
5	Arsenite	H6	5	19.5759616181945	-0.107069818966198	0.0503786557158609	0.0225300197591447
6	Arsenite	H6	6	23.9981824249417	-0.187183804705285	0.079118767879375	0.0323001017303621
8	Arsenite	H6	6	32.930607734549	-0.229392643405785	0.084344774361141	0.0344336099424961
10	Arsenite	H6	6	41.9063053612462	-0.196810533112868	0.079053075147923	0.0322732827850509
13	Arsenite	H6	6	56.5044907962639	-0.445761134618418	0.047846126940913	0.0195330995289447
16	Arsenite	H6	5	71.5683928798101	-0.532187254673518	0.0500303075402658	0.0223742337190509
21	Arsenite	H6	6	96.6569821757797	-0.505548240309418	0.0720438183745556	0.0294117656899014
26	Arsenite	H6	6	122.227350427694	-0.498781102440418	0.0659081590264848	0.0269068932501829
31	Arsenite	H6	5	147.639642872321	-0.534868838487918	0.0540101619116785	0.0241540787020566
36	Arsenite	H6	5	172.807007103719	-0.551457488511318	0.0762352996872823	0.0340934624771663
41	Arsenite	H6	6	198.101333162286	-0.493284787435585	0.118839649065955	0.0485160835705014
46	Arsenite	H6	6	223.277642809494	-0.500437199416752	0.0173324561724825	0.00707594560195583
51	Arsenite	H6	6	248.751726201824	-0.502456098912418	0.0904371961821835	0.0369208307357214
1	Arsenite	H7	6	3.63025088616924	0	0.064807258723489	0.0264574525835137
2	Arsenite	H7	5	7.40266380816833	0.01278598089955	0.0679380243258735	0.0303828081299375
3	Arsenite	H7	5	11.8909620957162	-0.26854995244665	0.0763154888663811	0.0341293241682713
4	Arsenite	H7	5	15.3704120200431	0.06219826338803	0.0460725404296438	0.0206042664593582
5	Arsenite	H7	5	20.867301119692	-0.52126179881785	0.0492101835756893	0.022007463132097
6	Arsenite	H7	6	25.5301600468324	-0.217406833598117	0.0975640802321319	0.039830368965447
8	Arsenite	H7	6	34.6808241755144	-0.18013699848085	0.12557493968597	0.0512657544518999
10	Arsenite	H7	6	44.5731908876351	-0.29637628065695	0.138844409819162	0.056682992949137
13	Arsenite	H7	6	62.2638824847566	-0.60248885367095	0.138735410561727	0.0566384941886271
16	Arsenite	H7	5	80.9246373377668	-0.62493301903445	0.0599641457061097	0.0268167812023127
21	Arsenite	H7	6	108.379827046168	-0.30769234030265	0.147190979307561	0.0600904656740135
26	Arsenite	H7	6	133.84765522945	-0.353649499097783	0.120447857262997	0.0491726318176539
31	Arsenite	H7	5	158.960773428517	-0.35587362216505	0.0948642436905715	0.0424245795052447
36	Arsenite	H7	5	184.74562695445	-0.49489789330485	0.145067036445488	0.0648759509573103
41	Arsenite	H7	6	211.107571736784	-0.42757288835845	0.158918852795065	0.0648783499760635
46	Arsenite	H7	6	237.657370118662	-0.514054297436283	0.118697348471235	0.0484579895959753
51	Arsenite	H7	6	264.249691200654	-0.462492366505783	0.1656515052075	0.0676269438137275
1	Arsenite	H8	6	3.41143534974057	0	0.0714590921298246	0.0291730522001006
2	Arsenite	H8	6	7.12027904670268	-0.0548763147929933	0.0965916989260355	0.0394333959595542
3	Arsenite	H8	5	11.6299485015221	-0.305703967011277	0.120794012182404	0.0540207245029585
4	Arsenite	H8	5	14.9667918685967	0.121155426991203	0.0627222900422721	0.0280502608477957
5	Arsenite	H8	5	19.5919207979163	-0.338201524881877	0.11235733074147	0.0502477258616705
6	Arsenite	H8	6	24.183703801983	-0.212300788474727	0.160822496697403	0.0656555093448452
8	Arsenite	H8	6	32.8980080584035	-0.19821474545701	0.0972919470776289	0.0397192710703426
10	Arsenite	H8	6	42.1392323750224	-0.31403903106931	0.0705993946253679	0.0288220821635901
13	Arsenite	H8	6	56.2525045291319	-0.29789323747831	0.0590446498848124	0.024104877376512
16	Arsenite	H8	5	70.7105784318016	-0.462074874020077	0.0556447033823007	0.0248850678701274
21	Arsenite	H8	6	95.3965463444352	-0.443739215767977	0.0784282080756288	0.0320181818710196
26	Arsenite	H8	6	121.513459950061	-0.599119560956477	0.0948287980689399	0.0387136946983876
31	Arsenite	H8	5	147.95656101131	-0.574506097366877	0.0669340313446858	0.0299338088189638
36	Arsenite	H8	5	174.168639301855	-0.595330269392277	0.0963490000936766	0.0430885827547189
41	Arsenite	H8	6	200.571724867993	-0.554455712499643	0.120266377315244	0.0490985429392302
46	Arsenite	H8	6	226.888103526389	-0.588820696398643	0.0887039097093079	0.0362132194962858
51	Arsenite	H8	6	253.095462193205	-0.575792943689643	0.118795956078684	0.0484982459831431
1	Arsenite	H9	6	3.37833707748159	0	0.137930795772515	0.0563100115764493
2	Arsenite	H9	6	6.99293301323287	-0.0563884401042983	0.0816292953589668	0.033325020282068
3	Arsenite	H9	5	10.9104505098659	-0.20648920548642	0.0889084430649716	0.0397610644933892
4	Arsenite	H9	5	14.1945089470565	0.03527393491868	0.0987826214594374	0.0441769313157863
5	Arsenite	H9	5	19.4424967881954	-0.5650821796368	0.124310436564114	0.055593317294007
6	Arsenite	H9	6	25.0152744466717	-0.567992784098433	0.175046086997378	0.071462265769068
8	Arsenite	H9	6	35.7302454247147	-0.4424663427751	0.189865377949605	0.0775122159662014
10	Arsenite	H9	6	48.3364585229458	-0.7029872006466	0.188441259029451	0.0769308218516313
13	Arsenite	H9	6	68.1052173237697	-0.741551926328933	0.140583526049212	0.0573929841769729
16	Arsenite	H9	5	88.1122675358886	-0.8389629957216	0.149953176155011	0.0670610990649209
21	Arsenite	H9	6	121.510759138992	-0.757569927502933	0.176635432810728	0.0721111134803244
26	Arsenite	H9	5	155.34730069585	-0.7519173456678	0.205047947324931	0.0917002297730685
31	Arsenite	H9	5	186.157906450933	-0.6510462769426	0.16833674599528	0.0752824814313124
36	Arsenite	H9	5	214.696135895584	-0.6882656804	0.143682072643622	0.0642565763158404
41	Arsenite	H9	6	243.035082646275	-0.6009899943866	0.136811925227322	0.0558532345891243
46	Arsenite	H9	6	271.016935330424	-0.608690217987767	0.12222874434849	0.0498996759258157
51	Arsenite	H9	6	298.97542810811	-0.599778092136933	0.179383782237559	0.0732331224354252
1	Citric acid	A1	5	6.27900663652426	0	0.188234999370873	0.0841812508675804
2	Citric acid	A1	6	12.6787619757068	0.0911268412123233	0.167486845140796	0.0683762182039159
3	Citric acid	A1	0	19.0554337378527	NA	NA	NA
4	Citric acid	A1	5	25.4090219229617	0.04984834505304	0.202347526624112	0.0904925649220924
5	Citric acid	A1	5	32.0989423043614	-0.03821369169536	0.24667774883213	0.110317642985053
6	Citric acid	A1	4	38.606782294215	0.29143628285584	0.144483816041296	0.0722419080206481
8	Citric acid	A1	6	51.2264757007275	0.0227412460883567	0.2007484296443	0.0819552032155906
10	Citric acid	A1	6	64.23433254391	-0.0370438936599617	0.159761849439191	0.0652225019148946
13	Citric acid	A1	6	83.8666088933748	-0.0155719308318166	0.0885795112742181	0.036162434047824
16	Citric acid	A1	5	103.242424475714	-0.03096554398056	0.0444815477944702	0.0198927529225683
21	Citric acid	A1	6	134.995078439667	0.06777645548624	0.135433071886058	0.0552903200697525
26	Citric acid	A1	6	166.547961176099	0.00239845940900668	0.217580376251034	0.0888268166429689
31	Citric acid	A1	5	199.237454951825	-0.04452018727136	0.0937992289771339	0.0419482904459879
36	Citric acid	A1	5	231.550478896027	0.31620674653344	0.192062028943783	0.085892750522966
41	Citric acid	A1	6	263.811686503145	0.133560522370123	0.237333339989494	0.0968909303207899
46	Citric acid	A1	6	297.057508627624	0.101579386224103	0.251856048448201	0.102819801221962
51	Citric acid	A1	5	329.899946233932	0.19831464028164	0.206328527659215	0.09227292270869
1	Citric acid	A10	6	5.78560643643724	0	0.0336098639780095	0.0137211695117454
2	Citric acid	A10	6	11.3380637551535	0.16973832162585	0.442511215089868	0.180654447071525
3	Citric acid	A10	5	17.2319951441135	0.0752096987957433	0.104448130588021	0.0467106240235179
4	Citric acid	A10	5	23.1550177527699	0.0270262751603233	0.0839755841678182	0.0375550229298993
5	Citric acid	A10	5	29.3882543228995	-0.0375701756989127	0.0518918704468336	0.0232067499597465
6	Citric acid	A10	6	34.8581223690974	0.1109235267909	0.115866434193372	0.0473022736815878
8	Citric acid	A10	6	46.4172478219356	-0.0506252217877417	0.0734642963799804	0.0299916734072576
10	Citric acid	A10	6	58.0331660742749	0.009538785184105	0.0358001632779836	0.014615355456564
13	Citric acid	A10	6	75.6501004260466	0.0631904458241167	0.116055622403747	0.0473795094450493
16	Citric acid	A10	5	93.6219043409092	0.0368300155266633	0.160357680746585	0.0717141349727148
21	Citric acid	A10	6	123.203102637413	0.0437910016176333	0.128926165819576	0.0526338867919025
26	Citric acid	A10	6	152.40918637147	0.029449921442005	0.104883997384487	0.0428187126292332
31	Citric acid	A10	5	181.075848372642	-0.0133240953504767	0.0506315621100495	0.0226431229370147
36	Citric acid	A10	5	209.478309742039	-0.00841155741645667	0.0972972711212792	0.0435126624504815
41	Citric acid	A10	6	238.543117934431	-0.0435995290343167	0.0527604776652086	0.0215393748108782
46	Citric acid	A10	6	267.941926717318	-0.0165678993115138	0.0449120454333079	0.0183352657693833
51	Citric acid	A10	6	296.579596295899	0.00229320511326667	0.0636853854685557	0.02599944974507
1	Citric acid	A11	6	5.80008483800932	0	0.0914877499344564	0.0373497175091272
2	Citric acid	A11	6	11.600756141675	-0.0357030491194233	0.0637480754460309	0.0260250428212035
3	Citric acid	A11	5	17.582409803952	-0.0878392180299813	0.0987635344891457	0.044168395363175
4	Citric acid	A11	5	23.4500492887339	0.00858627645672333	0.171871974542288	0.0768634837007339
5	Citric acid	A11	5	29.6347595228877	-0.0141616971109767	0.0624417428148781	0.0279247963135253
6	Citric acid	A11	6	35.5450297006744	0.17408261622365	0.179957862222957	0.0734674896080537
8	Citric acid	A11	6	47.1479435388193	-0.053307477258685	0.0797549107156375	0.032559805955757
10	Citric acid	A11	6	58.7696401594567	-0.059290728841245	0.0373006141360115	0.0152279119542789
13	Citric acid	A11	6	77.0581010566632	0.156447549425983	0.133160482770998	0.0543625394486025
16	Citric acid	A11	5	95.0777194663869	-0.0495499518276487	0.0892702705179897	0.0399228786496041
21	Citric acid	A11	6	124.537339361951	0.0541392999279	0.117209492988119	0.0478505751385358
26	Citric acid	A11	6	153.973551327417	-0.0864783290221833	0.0945298523527655	0.0385916506208179
31	Citric acid	A11	5	182.172897306406	-0.0636318300880767	0.0222372103479736	0.00994478279360616
36	Citric acid	A11	5	209.857221844451	-0.0470440961866367	0.0877703672069452	0.0392521014969696
41	Citric acid	A11	6	238.2565008427	-0.0870833972543333	0.0781855883791099	0.0319191327946829
46	Citric acid	A11	6	267.908163850647	-0.06272326359195	0.0701960539103281	0.0286574190062006
51	Citric acid	A11	6	296.638471454008	-0.0574968979807833	0.0920377338748515	0.0375742475125761
1	Citric acid	A12	6	5.80540247661902	0	0.144324642869428	0.0589202887232514
2	Citric acid	A12	6	11.7973936493748	-0.0365406322954916	0.227367189472497	0.0928222664097202
3	Citric acid	A12	5	17.4519591514338	-0.0709602906969133	0.114428726883405	0.0511740823780101
4	Citric acid	A12	5	23.5498004652982	0.0631953372098667	0.222019834398138	0.0992902884134964
5	Citric acid	A12	5	29.7742662847172	-0.0994634094163533	0.0491689803441832	0.0219890364867889
6	Citric acid	A12	0	33.1677189995122	NA	NA	NA
8	Citric acid	A12	6	43.5835927760812	-0.143585473341617	0.0674314017422284	0.0275287544848467
10	Citric acid	A12	6	55.5022363515564	-0.104580328139705	0.10011735471043	0.0408727389062973
13	Citric acid	A12	6	73.1436451827279	0.0875471482917167	0.164612874683401	0.0672029246778405
16	Citric acid	A12	5	90.5047377180647	-0.129521837708473	0.0550121917580393	0.0246022000724459
21	Citric acid	A12	6	119.744397456736	-0.0559847513815333	0.105683575627436	0.043145139080009
26	Citric acid	A12	6	149.648801479204	-0.148599415330967	0.169881888685261	0.0693539906365303
31	Citric acid	A12	5	178.390698334163	-0.193740402191853	0.0731739176870515	0.0327243708256443
36	Citric acid	A12	5	205.929725352625	-0.0770727206607333	0.0623815421103287	0.0278978737399921
41	Citric acid	A12	6	233.408418028251	-0.233709539941355	0.0926549333504269	0.037826218143355
46	Citric acid	A12	0	261.099450700557	NA	NA	NA
51	Citric acid	A12	6	289.030263775798	0.0761996675538833	0.178799710702767	0.072994676229838
1	Citric acid	A2	6	6.03581104369748	0	0.118385877657035	0.0483308321685486
2	Citric acid	A2	6	12.0486270733942	0.0410716296933	0.121238896243914	0.0494955721293038
3	Citric acid	A2	5	18.0543117250447	-0.0720891814386567	0.153971053519159	0.0688579484472194
4	Citric acid	A2	5	24.2323311176376	-0.00570342249643667	0.145806490949019	0.0652066450645429
5	Citric acid	A2	5	30.593796543233	-0.0182754883983923	0.211899430356658	0.0947643061341939
6	Citric acid	A2	6	36.3744378141433	0.229456012417617	0.124572142440796	0.050856364190876
8	Citric acid	A2	6	48.4446417306856	-0.0792601410616667	0.0515266725094257	0.0210356759652644
10	Citric acid	A2	6	60.7420956516244	0.0263650597596667	0.0627934569861429	0.025635321466909
13	Citric acid	A2	6	79.2515769183178	0.11649119992195	0.0529076440872242	0.0215994552510798
16	Citric acid	A2	5	97.9991649573704	-0.0519002802196627	0.046734025089736	0.0209000913925661
21	Citric acid	A2	6	128.745977626088	0.14423602155595	0.0828509965778149	0.0338237777161203
26	Citric acid	A2	6	158.628268154704	-0.00746026860141666	0.136769769000037	0.0558360243814027
31	Citric acid	A2	5	187.76224048397	-0.0378691926133627	0.0599810839671931	0.0268243562229533
36	Citric acid	A2	5	216.074685329643	-0.0518300669008427	0.072410788906851	0.0323830892600213
41	Citric acid	A2	6	245.186957987042	-0.075438212723385	0.112996723039797	0.0461307190090156
46	Citric acid	A2	6	275.99266749821	0.00396443155516667	0.0952154469098908	0.0388715434267156
51	Citric acid	A2	6	305.690002435918	-0.031671384433005	0.0665336811189645	0.0271622615750851
1	Citric acid	A3	6	6.06194615533716	0	0.0835064727602476	0.0340913747470382
2	Citric acid	A3	6	12.1695266797375	-0.0207883485006333	0.153564927568905	0.0626926191552124
3	Citric acid	A3	4	18.6596959645429	-0.0686522780480925	0.124035267779448	0.0620176338897238
4	Citric acid	A3	5	24.880589038811	-0.068870341069802	0.092941165414935	0.0415645527551694
5	Citric acid	A3	5	31.1038731713709	-0.05222424989721	0.0540295771432192	0.0241627614575614
6	Citric acid	A3	6	37.2757167205737	-0.0994975630732667	0.090052501207774	0.0367637796700687
8	Citric acid	A3	6	49.576953445099	-0.0976097375090767	0.0901462367226477	0.0368020470337716
10	Citric acid	A3	6	61.9051045746286	-0.0573940181414333	0.147256326801236	0.0601171436765927
13	Citric acid	A3	6	80.6936454880816	0.0071916764375	0.158890492219097	0.0648667718194079
16	Citric acid	A3	5	99.2632383227458	-0.084160621044106	0.105426378589334	0.047148109829476
21	Citric acid	A3	6	130.193041142793	0.05332566529695	0.148517207752628	0.0606318961694766
26	Citric acid	A3	6	160.479944939883	-0.108325724175817	0.0861597082777338	0.03517455361125
31	Citric acid	A3	5	190.163101929851	-0.12962171963507	0.0940186085439235	0.0420463999708311
36	Citric acid	A3	5	219.746697606719	-0.04771677612045	0.186065667856132	0.0832110963210416
41	Citric acid	A3	6	250.567137286539	-0.0627510059398167	0.0350088936640748	0.0142923209893897
46	Citric acid	A3	6	282.472874381502	-0.09987334626135	0.111829243382498	0.045654097434772
51	Citric acid	A3	6	313.176342781141	-0.0737321736811817	0.138544514879984	0.0565605613528987
1	Citric acid	A4	5	6.11409083621286	0	0.167441019933635	0.0748819005587009
2	Citric acid	A4	6	12.0093300812333	-0.07091401815552	0.136324764840156	0.0556543521938817
3	Citric acid	A4	5	18.3099319853838	-0.05417038626914	0.185543891681606	0.0829777509219858
4	Citric acid	A4	5	24.579087310941	-0.09469546831472	0.124558690607704	0.0557043398774383
5	Citric acid	A4	5	31.0652617051778	-0.10651488481976	0.0802024278248749	0.0358676161153882
6	Citric acid	A4	6	37.327626249739	0.0256415656911633	0.226851781102238	0.0926118518236713
8	Citric acid	A4	6	49.6831312242467	-0.122167859234682	0.103473631117157	0.0422429330116678
10	Citric acid	A4	6	62.0028815741237	-0.07541977830129	0.0776139875160111	0.0316857777194951
13	Citric acid	A4	6	80.6169748241248	0.129732377643888	0.177632024033982	0.0725179701435092
16	Citric acid	A4	5	99.7887087910917	-0.13336228219814	0.0808670045567405	0.0361648238651314
21	Citric acid	A4	5	132.635730777683	-0.0340371655229	0.0780973074705206	0.0349261776727572
26	Citric acid	A4	6	164.138183506788	-0.17863324796227	0.126784316415872	0.0517594804344094
31	Citric acid	A4	5	194.051835204018	-0.18332564762414	0.067921655478145	0.0303754877586906
36	Citric acid	A4	5	223.446250174975	-0.0948924414846058	0.150423226817411	0.0672713121117201
41	Citric acid	A4	6	253.452205014886	-0.0982319006356665	0.0798670276216139	0.032605577490954
46	Citric acid	A4	6	284.230659266229	-0.15453635388687	0.073182991475222	0.0298768311607909
51	Citric acid	A4	6	313.761437223887	-0.121758393526948	0.0975518137917837	0.0398253612121448
1	Citric acid	A5	6	6.0661700631326	0	0.149780212664352	0.0611475157655356
2	Citric acid	A5	6	11.8939532885777	-0.06212944011055	0.0672303439452313	0.0274466729829382
3	Citric acid	A5	5	18.089466907831	-0.056822599068956	0.103714645035841	0.0463825993124802
4	Citric acid	A5	5	23.5343971099803	-0.09070992567535	0.10500414095256	0.0469592794177789
5	Citric acid	A5	5	28.7202509763427	0.043382639341204	0.237552234422937	0.10623658887533
6	Citric acid	A5	6	34.8463641926479	-0.063327242288655	0.114504403584374	0.046746227013905
8	Citric acid	A5	5	46.9612087611775	-0.041922234868706	0.022788536576089	0.010191343378375
10	Citric acid	A5	6	59.2286466451789	-0.0265018026671883	0.0254529396433035	0.0103911190966585
13	Citric acid	A5	6	77.4416208979687	0.0736174175544	0.228029170823764	0.0930925191646938
16	Citric acid	A5	5	95.1837672874054	-0.07037802967703	0.0697346687501762	0.0311862919427649
21	Citric acid	A5	6	125.40968300603	0.0016228458392	0.150019725117187	0.0612452963149501
26	Citric acid	A5	6	155.742373278992	-0.0596365411763333	0.0855016093957068	0.0349058858677063
31	Citric acid	A5	5	185.603189475003	-0.11788629536781	0.103459549817171	0.0462685172625439
36	Citric acid	A5	5	215.001677424539	-0.01806791039539	0.140688429607847	0.0629177784501678
41	Citric acid	A5	6	243.112358637071	-0.0448428640001217	0.110097185956465	0.0449469879516087
46	Citric acid	A5	6	272.877838500524	-0.0780143014329833	0.100564366786518	0.0410552308221767
51	Citric acid	A5	6	303.309508799064	-0.05199492711535	0.0658162470156653	0.0268693703288927
1	Citric acid	A6	6	5.95378461812734	0	0.131948154774072	0.0538676086163761
2	Citric acid	A6	6	12.0350851007556	-0.148746587887017	0.152629950715386	0.0623109164531402
3	Citric acid	A6	5	18.2694578603569	-0.155764834607977	0.1048645803439	0.0468968660161898
4	Citric acid	A6	5	24.5899848323445	-0.206208860710632	0.126450685472983	0.0565504657038071
5	Citric acid	A6	5	31.1670527456012	-0.158126446082259	0.170937595723716	0.0764456167897213
6	Citric acid	A6	6	37.5247578165916	-0.200541437058558	0.166955018502437	0.0681591008879826
8	Citric acid	A6	6	50.008745464358	-0.149389539703772	0.172553736382517	0.0704447678913145
10	Citric acid	A6	6	62.4909570851957	-0.16309420949585	0.140688417160394	0.0574358057937975
13	Citric acid	A6	6	81.2804686441659	0.127586702003546	0.151510756915513	0.0618540074976443
16	Citric acid	A6	5	100.533767514959	-0.131215643705865	0.0803250941186095	0.0359224741496559
21	Citric acid	A6	6	132.42521368819	-0.156321162448517	0.095373431348354	0.0389360403036381
26	Citric acid	A6	6	163.897757815988	-0.23057475269125	0.161037992120893	0.0657434849830876
31	Citric acid	A6	5	194.707767525083	-0.290060906110937	0.0702408886037797	0.0314126803436083
36	Citric acid	A6	5	225.275332733705	-0.215881232008677	0.113776680375138	0.0508824783146149
41	Citric acid	A6	6	256.804302017532	-0.158773337231367	0.100117988258896	0.0408729975513756
46	Citric acid	A6	6	289.294644169835	-0.23040845874665	0.109550611913498	0.0447238500329556
51	Citric acid	A6	6	320.417746773816	-0.272971060738061	0.129825109363671	0.0530008789570026
1	Citric acid	A7	6	6.05390875207104	0	0.101932228083594	0.0416136578582999
2	Citric acid	A7	6	11.9340488971803	-0.0530575638692033	0.110067345629252	0.0449348056890372
3	Citric acid	A7	5	17.9550972283211	-0.121432343139077	0.101347391117037	0.0453239311759906
4	Citric acid	A7	5	24.0471318887205	-0.117604814288857	0.092551739949126	0.0413903963924257
5	Citric acid	A7	5	30.4839676597341	-0.138663696293145	0.0765116700979344	0.0342170590822038
6	Citric acid	A7	6	36.7484661176973	-0.16818896990372	0.0583539533669468	0.023822901703864
8	Citric acid	A7	6	49.3266481943006	-0.104274204545687	0.118825713921587	0.0485103945716361
10	Citric acid	A7	6	61.5763226441377	-0.00145535247483833	0.157105694490351	0.0641381311978237
13	Citric acid	A7	6	80.0783601187691	0.22606187640823	0.11119166231006	0.0453938060519171
16	Citric acid	A7	5	98.7654521170843	-0.0991093640225367	0.0841736474953618	0.0376435995427468
21	Citric acid	A7	6	129.490784126581	-0.025074934888945	0.107892532541843	0.0440469419640239
26	Citric acid	A7	6	158.954944027608	-0.0762221590274917	0.122713038706065	0.0500973882693769
31	Citric acid	A7	5	188.27794961292	-0.179850746334357	0.0682087272584465	0.0305038701617258
36	Citric acid	A7	5	217.726022022064	-0.144231302660719	0.0734702170973791	0.0328568799502814
41	Citric acid	A7	6	248.190069382462	-0.165008986279953	0.0479109435342416	0.0195595607923648
46	Citric acid	A7	6	278.65461679482	-0.0987169324939033	0.0872323924241579	0.0356124750802353
51	Citric acid	A7	6	307.978804545715	-0.112832301404777	0.0766200909273781	0.0312800211362878
1	Citric acid	A8	6	5.99884008275051	0	0.147611874670377	0.0602622954863476
2	Citric acid	A8	6	12.0789590566661	0.0582885747415588	0.153405566699257	0.062627560352612
3	Citric acid	A8	4	18.386656165959	-0.00505864495445783	0.219537427891356	0.109768713945678
4	Citric acid	A8	5	24.3845340283859	0.0398316576389122	0.181244619310401	0.0810550578668254
5	Citric acid	A8	5	30.7868184677024	-0.0106584894902098	0.106159086850885	0.0474757869255764
6	Citric acid	A8	6	37.1362007158108	-0.0503655975600245	0.136584259825978	0.0557602905782275
8	Citric acid	A8	6	49.451031576125	-0.0141267752499078	0.0990670067464026	0.0404439361455909
10	Citric acid	A8	6	61.934546808611	0.0608794936618038	0.151506532103601	0.0618522827254035
13	Citric acid	A8	6	80.7788284902359	0.286747515535742	0.178902175334162	0.073036507240438
16	Citric acid	A8	5	99.8477731891413	-0.0450239834031378	0.164416844039193	0.0735294479835235
21	Citric acid	A8	6	132.094308774189	0.283349049258509	0.122490208463084	0.0500064182036162
26	Citric acid	A8	6	164.478583282258	-0.0217701879823078	0.110719808915386	0.045201172710192
31	Citric acid	A8	5	196.28462617637	-0.130170139815958	0.0399613242895691	0.017871247516478
36	Citric acid	A8	5	227.535611398488	-0.0464080227437578	0.078785242226992	0.0352338314486682
41	Citric acid	A8	5	260.181463903437	0.0336808301356982	0.11652324594796	0.0521107797797129
46	Citric acid	A8	6	293.667949329358	0.0272577456626922	0.127361100775709	0.051994951663279
51	Citric acid	A8	6	325.979139995359	-0.00552118344016783	0.136689304543238	0.0558031749044712
1	Citric acid	A9	6	5.91242490666784	0	0.103220637306905	0.0421396487211344
2	Citric acid	A9	5	11.9102154644234	0.0323851024369347	0.086914857404236	0.0388695058821145
3	Citric acid	A9	5	18.0229949413063	-0.0430487012786553	0.101115017419773	0.0452200104993376
4	Citric acid	A9	5	24.095707918705	0.0156586362543767	0.132147148192911	0.0590980012784176
5	Citric acid	A9	5	30.4319694476875	0.0326905337874767	0.0740868502518864	0.0331326466804131
6	Citric acid	A9	6	36.5649133100311	0.0627102202086167	0.20041653756491	0.0818197088415613
8	Citric acid	A9	6	48.7817132418802	-0.0451417150911	0.100702724148419	0.0411117149786461
10	Citric acid	A9	6	60.8551117926434	-0.000351512050583331	0.119239340527836	0.0486792569265275
13	Citric acid	A9	6	79.0090536787991	0.2360681820375	0.178204373842329	0.0727516309743138
16	Citric acid	A9	5	97.8886946549805	-0.0533068853611073	0.0687954316201068	0.0307662523287995
21	Citric acid	A9	6	128.788879087082	0.0752251324931425	0.23562747881807	0.0961945154137873
26	Citric acid	A9	6	158.898068987124	-0.0334617030967167	0.064621095702085	0.0263814518482779
31	Citric acid	A9	5	187.705833160021	-0.0112179793260573	0.0356767115266341	0.0159551104374408
36	Citric acid	A9	4	215.086314119997	-0.0534366594063833	0.0397020831437407	0.0198510415718704
41	Citric acid	A9	6	242.843853264908	-0.0666781705466667	0.0785928387618554	0.0320853920672295
46	Citric acid	A9	6	271.218992300575	-0.04454408305905	0.0756225474581025	0.0308727757202927
51	Citric acid	A9	6	298.792634166919	0.00435240777838334	0.0935987085755362	0.038211512765588
1	Citric acid	B1	6	6.17467679058138	0	0.0648713854213766	0.0264836321982994
2	Citric acid	B1	6	12.4315882348944	0.0866972244970897	0.0750079350534033	0.0306218612567764
3	Citric acid	B1	5	18.8106025654031	0.0257096009310573	0.0791318265591534	0.0353888286739981
4	Citric acid	B1	5	25.1769694316231	0.0719693706892213	0.0720149630209178	0.0322060705423812
5	Citric acid	B1	5	31.8577965305662	0.0881027089712613	0.0606513719680674	0.0271241181298448
6	Citric acid	B1	6	38.1678888258633	0.246180784102255	0.0884757509529211	0.0361200740740366
8	Citric acid	B1	6	50.9120600319927	0.141345492432895	0.122784272437038	0.0501264693182699
10	Citric acid	B1	6	63.4201455251367	0.132984333344988	0.0636917619944416	0.026002052950862
13	Citric acid	B1	1	83.3305890820446	0.174438454223421	NA	NA
16	Citric acid	B1	4	102.62729874299	0.0463544661194063	0.104640101941042	0.052320050970521
21	Citric acid	B1	1	123.786350156877	0.365334496508421	NA	NA
26	Citric acid	B1	6	147.86761803768	0.0247990971919097	0.117484842586145	0.0479629861412098
31	Citric acid	B1	5	177.768356742393	0.0275054213422813	0.0868333375233913	0.0388330490830972
36	Citric acid	B1	5	207.755572434013	-0.0245375425523787	0.0701490559771202	0.0313716115444558
41	Citric acid	B1	6	239.090805628387	-0.002744406748067	0.127478191162517	0.0520427536135231
46	Citric acid	B1	6	270.747073816459	0.0758371371917747	0.130120472397525	0.0531214604106397
51	Citric acid	B1	6	300.999733415848	0.00892992878988467	0.0564681369125634	0.0230530203602334
1	Citric acid	B10	6	5.75176223629847	0	0.0726012104610598	0.0296393200563348
2	Citric acid	B10	6	11.3136890738023	0.000329618679774997	0.124384762773721	0.0507798667621246
3	Citric acid	B10	4	17.2257519068145	0.0105657407821517	0.0794063838898702	0.0397031919449351
4	Citric acid	B10	5	23.2913247849852	-0.0349256380140383	0.0605012680880487	0.0270569896339631
5	Citric acid	B10	5	29.5101158100919	0.0583282712888217	0.15724658363378	0.0703228100469476
6	Citric acid	B10	6	35.6148918701984	0.125025814161792	0.113661309473961	0.0464020352846287
8	Citric acid	B10	5	48.3682822703412	0.172182617534562	0.164161497958353	0.0734152537446141
10	Citric acid	B10	6	60.3260600363387	0.165254956539275	0.0666076476019798	0.0271924582653277
13	Citric acid	B10	5	79.1876602440203	0.325478768774542	0.109771581145713	0.0490913434878897
16	Citric acid	B10	5	97.3731240104158	0.170412192936402	0.11415673318194	0.0510524430968248
21	Citric acid	B10	6	125.882344757526	0.373280386694942	0.306916163349815	0.12529799900329
26	Citric acid	B10	6	154.751356301956	-0.058162763271925	0.0582667874553462	0.0237873163694663
31	Citric acid	B10	5	183.546225511039	-0.0447165820355783	0.0868617121493951	0.0388457386016134
36	Citric acid	B10	5	211.029426406454	-0.0460850590437383	0.0941777893083808	0.0421175877728385
41	Citric acid	B10	6	237.814545479432	-0.0475476703002417	0.067721309888592	0.0276471089899912
46	Citric acid	B10	6	263.959726183757	0.0430942813425083	0.0351828854575146	0.0143633528416163
51	Citric acid	B10	6	289.276590183056	-0.0181647255220483	0.0841370111304082	0.0343487909587282
1	Citric acid	B11	6	5.27741310853237	0	0.215057048777775	0.0877966725157303
2	Citric acid	B11	6	10.6239292929663	0.0218568149615333	0.176893042854253	0.0722162823401995
3	Citric acid	B11	5	16.1315909876271	-0.0404205181044267	0.266855941961181	0.119341605284988
4	Citric acid	B11	5	21.9615252410581	-0.126246498372463	0.0788767960928543	0.0352747755822024
5	Citric acid	B11	5	27.8824185927719	-0.114554770164349	0.0972062634506794	0.0434719625828945
6	Citric acid	B11	6	33.7215950064172	0.03080211773865	0.0672517016966449	0.027455392248441
8	Citric acid	B11	5	45.6047361105514	0.0240941350853933	0.0896070486719581	0.0400734904187261
10	Citric acid	B11	6	57.2331669545909	0.1042647049316	0.0710728499545259	0.0290153694923298
13	Citric acid	B11	0	74.6705665342788	NA	NA	NA
16	Citric acid	B11	5	92.3423258486912	0.0238809177640133	0.183279918061741	0.0819652711393288
21	Citric acid	B11	6	121.302346891928	0.00559015209428332	0.0501791804275874	0.0204855646264403
26	Citric acid	B11	6	150.34426746198	-0.159098545435733	0.11249158141654	0.0459244958048791
31	Citric acid	B11	5	179.308738196995	-0.134988986943927	0.0974306070665851	0.0435722920979911
36	Citric acid	B11	5	208.276335128354	-0.161227164953867	0.0966827317428545	0.0432378320854799
41	Citric acid	B11	5	238.053132976983	-0.157124573038447	0.110952026762762	0.0496192548165826
46	Citric acid	B11	6	267.363365439183	-0.140775150963587	0.0589306393408864	0.0240583327668594
51	Citric acid	B11	6	294.928896235657	-0.140446081589	0.074609982269522	0.0304593977130715
1	Citric acid	B12	6	5.74258856688529	0	0.0793542595362775	0.032396240796711
2	Citric acid	B12	6	11.5574330396445	-0.01507834034313	0.113258342499814	0.0462375247063196
3	Citric acid	B12	5	17.4822684769769	-0.0429191878707467	0.104604547138382	0.0467805756314006
4	Citric acid	B12	5	23.1501383162882	-0.0139448445880067	0.0766167668885759	0.0342640597958222
5	Citric acid	B12	5	29.2545927896174	-0.0271162858483667	0.07471409333432	0.0334131583145607
6	Citric acid	B12	0	35.2709431718127	NA	NA	NA
8	Citric acid	B12	5	47.402642026301	0.0306032303366733	0.160579707544882	0.0718134283754783
10	Citric acid	B12	6	59.3612183895006	0.0727724224040167	0.12579266244163	0.0513546393946934
13	Citric acid	B12	0	76.9298662191443	NA	NA	NA
16	Citric acid	B12	5	94.0992803670453	-0.0465860288017067	0.128950191163369	0.0576682786305772
21	Citric acid	B12	6	123.256893727605	0.137737557623083	0.187113418189277	0.0763887330986221
26	Citric acid	B12	6	152.564842968471	-0.0722407257860683	0.144476074208533	0.0589821103085639
31	Citric acid	B12	5	180.288935843846	-0.0584664621052667	0.0533250858287277	0.0238477033638091
36	Citric acid	B12	5	207.496784490343	-0.126371937121147	0.101600200469106	0.0454369909553055
41	Citric acid	B12	6	236.412545875089	-0.1516290347096	0.102702379612631	0.0419280709034274
46	Citric acid	B12	0	266.328871171039	NA	NA	NA
51	Citric acid	B12	6	296.296743403561	-0.0348374545941333	0.14718182214735	0.060086727279012
1	Citric acid	B2	6	5.79002002939342	0	0.0910122828543956	0.0371556088865206
2	Citric acid	B2	6	11.617364966497	0.0496709197744337	0.0492261054666298	0.0200964734029454
3	Citric acid	B2	5	17.9153830646749	-0.0570701503869997	0.145347481805363	0.0650013699350413
4	Citric acid	B2	5	24.2832406205577	-0.0818767222929957	0.0638789178090051	0.0285675205100115
5	Citric acid	B2	5	30.4274543582275	-0.0561747005448397	0.0911675541641758	0.0407713696906982
6	Citric acid	B2	6	36.6827854897985	0.033301518591317	0.111982950249238	0.0457168480003511
8	Citric acid	B2	6	49.2501294497482	0.105846823255917	0.226633691360897	0.092522817059601
10	Citric acid	B2	4	61.7548511692984	0.3088836746273	0.0382408509723925	0.0191204254861963
13	Citric acid	B2	0	80.4762118303532	NA	NA	NA
16	Citric acid	B2	5	99.2051267185042	0.0602623329901803	0.0800093176244791	0.0357812546083414
21	Citric acid	B2	5	130.058376131123	0.1523143351378	0.0914691067095958	0.0409062280887676
26	Citric acid	B2	6	160.491391842371	-0.136633430402325	0.0264649719009392	0.0108042795357326
31	Citric acid	B2	5	190.155049148477	-0.0243460549228797	0.064215130327793	0.0287178793193907
36	Citric acid	B2	5	219.695172304158	-0.0532258151898997	0.0882363627712091	0.039460501048751
41	Citric acid	B2	6	249.196310277526	-0.0476910334604547	0.114663973695537	0.0468113712389964
46	Citric acid	B2	6	279.46455649619	-0.012314429008783	0.0742900469542924	0.03032878466757
51	Citric acid	B2	6	310.204318821459	-0.039852937525683	0.0593913386364873	0.0242464124667063
1	Citric acid	B3	6	5.88268290717775	0	0.104050728624234	0.0424785320823627
2	Citric acid	B3	6	11.8130178061874	-0.029712796609955	0.0817736001844154	0.033383932480363
3	Citric acid	B3	5	18.1087844999401	-0.062397991539411	0.0607894214339551	0.0271858557278412
4	Citric acid	B3	5	24.480245004634	-0.075641360540945	0.130687002187978	0.0584450041335964
5	Citric acid	B3	5	30.773116916893	-0.038434592137935	0.0594932264387493	0.0266061797035662
6	Citric acid	B3	6	37.1462152980243	-0.0464775863333917	0.125761897187546	0.0513420795323078
8	Citric acid	B3	5	49.7347537344806	0.271457454933075	0.148192468586447	0.0662736867025594
10	Citric acid	B3	6	62.4964405980447	0.0886597222430583	0.0684650739162024	0.0279507493827717
13	Citric acid	B3	2	81.4167305825133	0.315443003419275	0.192132952733143	0.135858513767
16	Citric acid	B3	4	99.862935091233	0.10292046238565	0.0966537938963101	0.0483268969481551
21	Citric acid	B3	5	130.033064786102	0.265728415734875	0.147765405813181	0.0660826984242231
26	Citric acid	B3	6	160.261505162472	-0.0907509486190483	0.0466416761238779	0.0190413845419423
31	Citric acid	B3	5	189.60572409173	-0.066342122360165	0.0607000053594184	0.0271458676436522
36	Citric acid	B3	5	217.532286907098	-0.070711554809103	0.0318952878316484	0.0142640063506976
41	Citric acid	B3	6	245.345787770206	-0.000727215057008332	0.0333701464099354	0.013623305224385
46	Citric acid	B3	6	273.440108272438	-0.000606439938128332	0.0739590747670707	0.0301936658379456
51	Citric acid	B3	6	300.555592734611	-0.0448834007503583	0.109566324935371	0.0447302648472732
1	Citric acid	B4	6	6.01280498097495	0	0.060755772211669	0.0248034401412257
2	Citric acid	B4	6	12.0775107281203	0.00876258217668334	0.0874271354089333	0.0356919785708497
3	Citric acid	B4	4	18.4585634676871	-0.0596417560235917	0.11141505135429	0.0557075256771452
4	Citric acid	B4	5	24.5918278707123	0.0187055751708633	0.0991667392887852	0.0443487140313446
5	Citric acid	B4	5	31.0480637153845	0.0341320157149433	0.079060389995242	0.0353568812714011
6	Citric acid	B4	6	37.4731943102822	-0.0214614304380333	0.126211562838125	0.0515256547654369
8	Citric acid	B4	4	50.0634750254572	0.247759372361933	0.117421243825227	0.0587106219126134
10	Citric acid	B4	1	58.5774728259034	0.0926483483181833	NA	NA
13	Citric acid	B4	4	72.7123152413677	0.195219713995383	0.277058416120124	0.138529208060062
16	Citric acid	B4	5	90.9078523234229	0.168124403297383	0.0800808494364654	0.0358132446071725
21	Citric acid	B4	5	122.917677541184	0.194836663995263	0.196131358546709	0.0877126100459653
26	Citric acid	B4	6	155.229871587877	-0.1305375969395	0.13718344272074	0.0560049059706894
31	Citric acid	B4	5	186.881464534692	-0.137305054039377	0.0954952452357088	0.0427067719750115
36	Citric acid	B4	5	217.52249855234	-0.0635011752470967	0.0576048878993047	0.0257616890358201
41	Citric acid	B4	6	250.424827922227	-0.06568589749935	0.0590085706303062	0.0240901480825386
46	Citric acid	B4	6	284.708944184296	-0.0941427013340333	0.0404987461750751	0.0165335438919043
51	Citric acid	B4	6	316.389252178441	-0.157513937527583	0.14302013609818	0.0583877260639912
1	Citric acid	B5	6	5.96441175785347	0	0.117689892890908	0.0480466975775882
2	Citric acid	B5	6	12.0577154367965	0.0439298035467	0.159727900167608	0.0652086421828085
3	Citric acid	B5	4	18.4913072889029	-0.0784012069020417	0.117413302578639	0.0587066512893196
4	Citric acid	B5	4	24.1104884705897	0.0225337444987333	0.113539290114929	0.0567696450574645
5	Citric acid	B5	4	30.5038607068542	-0.0513222501401917	0.107998728813691	0.0539993644068455
6	Citric acid	B5	5	36.8209211110181	0.0322523207694633	0.150126156802672	0.0671384583623135
8	Citric acid	B5	5	49.122101299462	0.254697024559083	0.144703374224167	0.0647133162677658
10	Citric acid	B5	5	62.1284654514151	0.139906298363569	0.204550198027484	0.0914776295200996
13	Citric acid	B5	5	81.6236476023194	0.273626898265483	0.050459574824979	0.022566207884878
16	Citric acid	B5	5	99.954063207984	0.235357957437683	0.0772789355359553	0.034560190617444
21	Citric acid	B5	6	130.012960658659	0.234596999204733	0.125318734416306	0.0511611590885517
26	Citric acid	B5	6	159.958064823943	0.0122280911916383	0.145204065549647	0.059279311529046
31	Citric acid	B5	5	191.208210781882	-0.0887132044748747	0.0733729961516091	0.0328134014215657
36	Citric acid	B5	5	222.679198440873	-0.0489830446735567	0.122000819025296	0.0545604249302422
41	Citric acid	B5	6	254.883105001074	0.0220332425555533	0.081916699424588	0.0334423525005302
46	Citric acid	B5	6	285.176449263331	-0.0336901993244952	0.0815262063358504	0.0332829343646151
51	Citric acid	B5	6	313.951883302347	-0.0882031369155933	0.0981487561139736	0.0400690618946843
1	Citric acid	B6	6	6.05518748002589	0	0.157197525674276	0.0641756211216723
2	Citric acid	B6	6	12.2608725910837	-0.0637250975989817	0.133768950175595	0.0546109452263324
3	Citric acid	B6	5	18.7147456235753	-0.108720089881022	0.0865957339786004	0.0387267895475278
4	Citric acid	B6	4	24.8217591512005	-0.0833767561713067	0.179172069254115	0.0895860346270573
5	Citric acid	B6	5	30.3110057639741	-0.0662330463538737	0.0992097951629834	0.0443679692036521
6	Citric acid	B6	6	36.9204204366751	-0.133229109696248	0.130896391778575	0.0534382281714911
8	Citric acid	B6	5	49.9030884578563	0.0976204259654843	0.165432828182515	0.0739838099052292
10	Citric acid	B6	5	62.952131648554	0.0230225427549983	0.111320568960238	0.049784071897809
13	Citric acid	B6	3	81.0201780225362	0.370259694207185	0.18469562264658	0.106634067453149
16	Citric acid	B6	4	98.967653555275	0.148271432093118	0.175339591249408	0.0876697956247041
21	Citric acid	B6	4	127.83338130332	0.300684998010518	0.0968583947636145	0.0484291973818072
26	Citric acid	B6	6	158.483230995788	-0.218758708540752	0.136217573186283	0.0556105913844364
31	Citric acid	B6	5	190.339919348296	-0.196671119730402	0.0762456180299947	0.0340980769803104
36	Citric acid	B6	5	221.550907825996	-0.201690443149962	0.0666886632550723	0.0298240768733868
41	Citric acid	B6	6	251.084069216571	-0.0316468595574983	0.177230003577336	0.0723538459793518
46	Citric acid	B6	6	282.00832534527	-0.190553967301565	0.141981525642239	0.0579637151208954
51	Citric acid	B6	6	313.482519031423	-0.196706175697027	0.0828888758432488	0.0338392418614777
1	Citric acid	B7	6	6.05226819466032	0	0.126048570832173	0.0514591135576478
2	Citric acid	B7	6	12.1262162862794	0.06733411472525	0.113578123170589	0.046368074618487
3	Citric acid	B7	5	18.7026986746341	-0.0766731477567267	0.0868342716204211	0.0388334668239885
4	Citric acid	B7	4	25.0515262927816	-0.0691256708314167	0.144296862360551	0.0721484311802754
5	Citric acid	B7	5	30.9800724826046	0.148986673152465	0.200153520920429	0.0895113757428009
6	Citric acid	B7	6	37.6388466096625	-0.0378302640763	0.0605187556125835	0.0247066785198375
8	Citric acid	B7	4	50.4356020548951	0.165419606805283	0.173444984685389	0.0867224923426946
10	Citric acid	B7	6	63.5501141962717	0.133147635775367	0.14240905600583	0.0581382536609526
13	Citric acid	B7	2	83.3379073300161	0.330839321358033	0.150684862186875	0.1065502878745
16	Citric acid	B7	5	101.973445037959	0.139614886633453	0.141558417919596	0.0633068490511081
[truncated: 11,825 more rows]
