# Supplementary material for: Genetically controlled mtDNA deletions prevent ROS damage by arresting oxidative phosphorylation
Source: eLife. 2022 Jul 8;11:e76095. doi: 10.7554/eLife.76095 (PMC9427111; doi:10.7554/eLife.76095)
Supplement: Figure 1—source data 2. — Data are shown in Figure 1C. [file elife-76095-fig1-data2.xlsx]

## Sheet: Data S5 - Counter selection
README: Growth defect is defined as the Dabsnorm - Dabsnorm_control
Dabsnorm_control = 1.71987
Environment	N	Growth defect	SD Growth defect	S.E.M Growth defect	Batch cycle t
Arsenite	96	0.159811737010097	0.133123755161261	0.0135868863661787	7
Glycine	96	0.193505984917741	0.127637150354738	0.0130269121080003	20
Paraquat	179	-0.0211732004946525	0.207804042511255	0.0155320033788627	4
