# Supplementary material for: Genetically controlled mtDNA deletions prevent ROS damage by arresting oxidative phosphorylation
Source: eLife. 2022 Jul 8;11:e76095. doi: 10.7554/eLife.76095 (PMC9427111; doi:10.7554/eLife.76095)
Supplement: Figure 1—source data 3. — Data are shown in Figure 1B. [file elife-76095-fig1-data3.xlsx]

## Sheet: Data S6 - Relaxation Gly & As
Environment	Ancestral batch cycle t	Batch Cycle tR	Population	N	Generation time Dnorm	SD Dnorm	SEM Dnorm	Generations of relaxation GR
Arsenite	7	1	A1	4	-0.0444759493531022	0.115231577471695	0.0576157887358477	8.69413306468162
Arsenite	7	2	A1	4	-0.0815376125426792	0.0705135968433429	0.0352567984216715	16.4369344134585
Arsenite	7	3	A1	4	-0.0863649504282785	0.122716710636537	0.0613583553182683	24.0719589736058
Arsenite	7	4	A1	4	-0.0683607966364136	0.0683822858562917	0.0341911429281458	31.828271544777
Arsenite	7	5	A1	4	-0.0966567889946547	0.090188629791528	0.045094314895764	39.1892100263604
Arsenite	7	6	A1	4	-0.0925227315797684	0.053993100715378	0.026996550357689	46.6542332055318
Arsenite	7	7	A1	4	-0.0144256888010578	0.0345265945161981	0.0172632972580991	54.3691141200998
Arsenite	7	8	A1	4	-0.0527345896467126	0.0566470245736255	0.0283235122868128	61.8133862641539
Arsenite	7	9	A1	4	-0.163629909146192	0.0550847716463005	0.0275423858231502	69.4026159698542
Arsenite	7	10	A1	4	-0.149787468663	0.0774411846909297	0.0387205923454648	77.1073421255417
Arsenite	7	11	A1	4	0.0206556664673265	0.142644177400548	0.0713220887002741	83.9828226430023
Arsenite	7	1	A10	4	-0.245462118767805	0.0753166511206641	0.037658325560332	8.71597297501069
Arsenite	7	2	A10	4	-0.178537626925031	0.0721710572655414	0.0360855286327707	16.6199620614109
Arsenite	7	3	A10	4	-0.193675914126006	0.0557946347702475	0.0278973173851238	24.6796609877069
Arsenite	7	4	A10	4	-0.0665869375129426	0.0853314815099902	0.0426657407549951	32.76633883769
Arsenite	7	5	A10	4	-0.0521187181760793	0.143684076792285	0.0718420383961424	40.8221944391955
Arsenite	7	6	A10	4	-0.191616714165592	0.252825717567908	0.126412858783954	48.9867817534434
Arsenite	7	7	A10	4	-0.0294448615540489	0.0365059701753721	0.0182529850876861	57.0129193099512
Arsenite	7	8	A10	4	0.00942363349812986	0.025467365085214	0.012733682542607	65.0421526132151
Arsenite	7	9	A10	2	0.0777529035855079	0.00450802697710831	0.00318765644528518	72.2502358102387
Arsenite	7	10	A10	4	0.0225424728333203	0.0594265477833651	0.0297132738916825	80.1160624908049
Arsenite	7	11	A10	4	-0.119912199895234	0.209279254327913	0.104639627163957	88.5439371755277
Arsenite	7	1	A11	4	-0.166711658237936	0.221393924003977	0.110696962001989	8.14995753879674
Arsenite	7	2	A11	4	-0.133994269482116	0.0943083046312995	0.0471541523156497	15.9360821327381
Arsenite	7	3	A11	3	-0.0475484474431757	0.120274422786376	0.0694404703723408	23.2572034450524
Arsenite	7	4	A11	4	-0.0551304792456309	0.0745997268976681	0.037299863448834	30.908976402672
Arsenite	7	5	A11	4	-0.0269985807534727	0.132197157993983	0.0660985789969915	38.3723298958176
Arsenite	7	6	A11	4	-0.0574826199559967	0.111753536282582	0.0558767681412909	46.2348294993238
Arsenite	7	7	A11	4	-0.000526162512628381	0.125591092325232	0.0627955461626161	53.9029564844405
Arsenite	7	8	A11	4	-0.0706748406818309	0.0904086665267037	0.0452043332633519	61.879427311845
Arsenite	7	9	A11	4	-0.00338197856472883	0.16444220133003	0.0822211006650151	69.2817112877336
Arsenite	7	10	A11	4	-0.00480097246750927	0.103483796577519	0.0517418982887595	77.2966735229008
Arsenite	7	11	A11	4	-0.0420527378485632	0.0632481346022727	0.0316240673011363	84.8456247865964
Arsenite	7	1	A12	4	-0.33389140942487	0.0222973112690351	0.0111486556345176	9.57701636238826
Arsenite	7	2	A12	4	-0.157583190520291	0.0835760281608449	0.0417880140804224	17.4804447355071
Arsenite	7	3	A12	3	-0.127041324282588	0.0966491246984963	0.0558003981616186	24.8010069608821
Arsenite	7	4	A12	4	-0.159209378624944	0.0870183986623515	0.0435091993311758	32.9427379617773
Arsenite	7	5	A12	4	-0.134393416727396	0.0996865065895311	0.0498432532947656	41.4369246129386
Arsenite	7	6	A12	4	-0.210655572163376	0.138240783501332	0.0691203917506658	49.7536863993476
Arsenite	7	7	A12	3	-0.0611015232974785	0.029264366229863	0.0168957897204752	57.7180866505137
Arsenite	7	8	A12	4	-0.172040183896035	0.157782221724564	0.0788911108622822	66.2493144777502
Arsenite	7	9	A12	4	-0.199407494771682	0.00634100078799857	0.00317050039399929	74.8016687330362
Arsenite	7	10	A12	4	-0.185858998847272	0.126250284888162	0.0631251424440811	83.5229809832905
Arsenite	7	11	A12	4	-0.173936570836781	0.144958658945855	0.0724793294729277	91.6750842475589
Arsenite	7	1	A2	4	-0.324309962109424	0.0176616619712036	0.00883083098560179	8.71434413453214
Arsenite	7	2	A2	4	-0.27744488554702	0.068872033865523	0.0344360169327615	16.7271105319689
Arsenite	7	3	A2	4	-0.233149490715234	0.0639965053598971	0.0319982526799486	24.4443392319982
Arsenite	7	4	A2	4	-0.269580935023365	0.0777062923720727	0.0388531461860364	32.2490950376986
Arsenite	7	5	A2	4	-0.2671171247805	0.0905796447874277	0.0452898223937139	40.0211259345083
Arsenite	7	6	A2	4	-0.286057376522789	0.0632112824079845	0.0316056412039923	48.1424360878956
Arsenite	7	7	A2	4	-0.177196514183069	0.0841881226377457	0.0420940613188729	55.9904908914936
Arsenite	7	8	A2	4	-0.320872035574454	0.0409520491190596	0.0204760245595298	64.5716006982069
Arsenite	7	9	A2	4	-0.200970337976302	0.0835254701039667	0.0417627350519834	72.628510170201
Arsenite	7	10	A2	3	-0.271482507928149	0.123335076626987	0.0712075396911142	81.8408511109478
Arsenite	7	11	A2	4	-0.270999293478662	0.0520101106912703	0.0260050553456351	90.2682503547416
Arsenite	7	1	A3	4	-0.289770431175904	0.135341352978919	0.0676706764894595	8.11709071376585
Arsenite	7	2	A3	4	-0.27983307536319	0.125154980594063	0.0625774902970316	15.8086942671097
Arsenite	7	3	A3	4	-0.19970471215312	0.122359107640086	0.0611795538200429	23.0760177428293
Arsenite	7	4	A3	4	-0.102245086981538	0.117092576570098	0.0585462882850489	30.3446042173451
Arsenite	7	5	A3	4	-0.172745410597627	0.0937102144915723	0.0468551072457862	37.5635277374809
Arsenite	7	6	A3	4	-0.164579367734197	0.111296123090846	0.0556480615454231	44.7763282732978
Arsenite	7	7	A3	4	-0.116037271060823	0.0860215937761005	0.0430107968880502	52.1090426952384
Arsenite	7	8	A3	4	-0.116990802592068	0.0995018330305118	0.0497509165152559	59.5833131409102
Arsenite	7	9	A3	4	-0.221607507596714	0.0939421159971516	0.0469710579985758	67.0070403712296
Arsenite	7	10	A3	4	-0.188282035397485	0.111677540654214	0.0558387703271071	74.4790145107765
Arsenite	7	11	A3	4	-0.243123746443081	0.146233421326014	0.073116710663007	81.9857538144043
Arsenite	7	1	A4	4	-0.27678365236746	0.114362015181137	0.0571810075905686	8.04704034678629
Arsenite	7	2	A4	4	-0.236485393991591	0.0778771389686404	0.0389385694843202	15.7011016982193
Arsenite	7	3	A4	4	-0.0975216546220843	0.0595026304108178	0.0297513152054089	22.8336841300946
Arsenite	7	4	A4	4	-0.0956546294137093	0.106589018502222	0.0532945092511109	30.2448960072468
Arsenite	7	5	A4	4	-0.167386864856793	0.12015623514254	0.0600781175712702	37.4543964093741
Arsenite	7	6	A4	4	-0.131013650953626	0.0533849102199446	0.0266924551099723	44.7266797083716
Arsenite	7	7	A4	4	-0.034595981598935	0.100366673269788	0.0501833366348939	51.876868035364
Arsenite	7	8	A4	4	-0.10600389771042	0.0752799941444474	0.0376399970722237	59.4015238703241
Arsenite	7	9	A4	4	-0.0580946926230904	0.115520947116923	0.0577604735584613	66.2059103740022
Arsenite	7	10	A4	4	-0.0454712959056374	0.136371784929509	0.0681858924647547	73.2901744772643
Arsenite	7	11	A4	4	-0.0873496627358527	0.126878423800596	0.0634392119002982	80.0101894743299
Arsenite	7	1	A5	3	-0.307443442439525	0.0256124005483628	0.0147873263511898	7.74901626118022
Arsenite	7	2	A5	4	-0.266041802479302	0.0812739551547505	0.0406369775773752	15.372700906905
Arsenite	7	3	A5	4	-0.272057289162787	0.108320343026988	0.0541601715134942	22.8680345739933
Arsenite	7	4	A5	4	-0.220178471276088	0.0535096146341508	0.0267548073170754	30.4766265088299
Arsenite	7	5	A5	4	-0.266742617513021	0.120343995702402	0.060171997851201	37.6892051226819
Arsenite	7	6	A5	4	-0.317098986997552	0.088005708557321	0.0440028542786605	45.2685557176412
Arsenite	7	7	A5	4	-0.214252617357087	0.0892373822823548	0.0446186911411774	52.8723045188196
Arsenite	7	8	A5	4	-0.210563351923727	0.0458416536293779	0.0229208268146889	60.4116654720169
Arsenite	7	9	A5	4	-0.262719269142958	0.0750617179123824	0.0375308589561912	67.6250597048468
Arsenite	7	10	A5	4	-0.291190270867179	0.156867324998842	0.0784336624994209	75.1326478686083
Arsenite	7	11	A5	4	-0.259516259387638	0.095329301938293	0.0476646509691465	82.2381821753293
Arsenite	7	1	A6	4	-0.416510002344739	0.132324356972561	0.0661621784862805	7.4637353935924
Arsenite	7	2	A6	4	-0.340153967150364	0.121901309407568	0.060950654703784	14.8863483191451
Arsenite	7	3	A6	4	-0.378038840659373	0.117088486899687	0.0585442434498436	22.1369802535677
Arsenite	7	4	A6	4	-0.301868794733318	0.0810711889216146	0.0405355944608073	29.6147506668652
Arsenite	7	5	A6	4	-0.357853354254106	0.114632347012067	0.0573161735060336	37.0163863257777
Arsenite	7	6	A6	4	-0.272280052246685	0.0742597077727748	0.0371298538863874	44.2655833091804
Arsenite	7	7	A6	4	-0.355139896227667	0.132383154767264	0.066191577383632	51.863899894006
Arsenite	7	8	A6	4	-0.245853219910656	0.088265511372774	0.044132755686387	59.322663750936
Arsenite	7	9	A6	4	-0.413759454137459	0.114886346913295	0.0574431734566474	66.8141391453183
Arsenite	7	10	A6	4	-0.249446263301604	0.101610012054887	0.0508050060274433	74.2796545331426
Arsenite	7	11	A6	4	-0.391244681946628	0.135984862620826	0.0679924313104131	81.5828462147353
Arsenite	7	1	A7	4	-0.203613335256726	0.0961804841091231	0.0480902420545615	7.36781903749238
Arsenite	7	2	A7	4	-0.212257333695312	0.0955683257012934	0.0477841628506467	14.4798242701918
Arsenite	7	3	A7	4	-0.254269547191513	0.137296113613498	0.0686480568067491	21.7116997895744
Arsenite	7	4	A7	4	-0.122748875347707	0.114046241397306	0.0570231206986531	29.0805735176573
Arsenite	7	5	A7	4	-0.150280751258034	0.0779028356383923	0.0389514178191962	36.3398358637273
Arsenite	7	6	A7	4	-0.201383459983286	0.0782627769611361	0.0391313884805681	43.5904514544097
Arsenite	7	7	A7	4	-0.139962414137691	0.111919996032433	0.0559599980162163	50.7801164795113
Arsenite	7	8	A7	4	-0.153363820313095	0.0929942306874561	0.0464971153437281	58.2120596610245
Arsenite	7	9	A7	4	-0.283173577692741	0.102853011586479	0.0514265057932394	65.7763202624121
Arsenite	7	10	A7	4	-0.127664862933035	0.105589970466821	0.0527949852334105	73.1764885287946
Arsenite	7	11	A7	4	-0.145332946136393	0.112244256112217	0.0561221280561084	79.9911523951579
Arsenite	7	1	A8	4	-0.328228907709454	0.160886561896498	0.0804432809482491	9.17496466150895
Arsenite	7	2	A8	4	-0.159322227011858	0.0291505665381172	0.0145752832690586	16.7394999154998
Arsenite	7	3	A8	4	-0.107780537402851	0.0935692930455853	0.0467846465227926	24.1678139015626
Arsenite	7	4	A8	4	-0.0364744325281319	0.110070761578709	0.0550353807893545	32.0155575731986
Arsenite	7	5	A8	4	-0.0860007317817689	0.0591335860355602	0.0295667930177801	39.5262181254558
Arsenite	7	6	A8	4	-0.126165118831604	0.123593926258206	0.0617969631291028	47.4298491097398
Arsenite	7	7	A8	4	-0.0986124655634688	0.0712303389906503	0.0356151694953252	55.2374122812077
Arsenite	7	8	A8	4	-0.100920813314356	0.0379726267416972	0.0189863133708486	63.4034912195257
Arsenite	7	9	A8	4	-0.110374455538102	0.0481609467760832	0.0240804733880416	71.2207487909923
Arsenite	7	10	A8	4	-0.0370938504523013	0.0315103838504579	0.0157551919252289	79.1715546938398
Arsenite	7	11	A8	4	-0.188422570860095	0.192581702225296	0.0962908511126478	87.1308698109058
Arsenite	7	1	A9	4	-0.165352526913018	0.0850701151320206	0.0425350575660103	7.68449118576749
Arsenite	7	2	A9	4	-0.200656539211634	0.067597684401118	0.033798842200559	15.3854082450595
Arsenite	7	3	A9	4	-0.197396684381715	0.0788743449549	0.03943717247745	23.0760661731329
Arsenite	7	4	A9	4	-0.186103628763467	0.0372748772215481	0.018637438610774	30.835093755533
Arsenite	7	5	A9	4	-0.155566326648359	0.0500304681908894	0.0250152340954447	38.0869490882288
Arsenite	7	6	A9	4	-0.268029737214841	0.0866052112755548	0.0433026056377774	45.7890459939805
Arsenite	7	7	A9	4	-0.101151693658591	0.0353643379762761	0.0176821689881381	53.4921080175509
Arsenite	7	8	A9	4	-0.218633066615012	0.077641756427624	0.038820878213812	61.3438771209324
Arsenite	7	9	A9	4	-0.16198020122587	0.106094742958342	0.0530473714791709	68.6808246189419
Arsenite	7	10	A9	4	-0.219921637024477	0.110800584607874	0.0554002923039369	76.4782014248824
Arsenite	7	11	A9	4	-0.217917043270808	0.0739591374379372	0.0369795687189686	83.846536463261
Arsenite	7	1	B1	4	-0.394624170213405	0.0619408649947706	0.0309704324973853	8.04304017668808
Arsenite	7	2	B1	4	-0.203585546522085	0.115243480606003	0.0576217403030014	15.7855634399688
Arsenite	7	3	B1	4	-0.141775215258163	0.0692603527422612	0.0346301763711306	23.22852750734
Arsenite	7	4	B1	4	-0.203570085970098	0.0549440841020011	0.0274720420510005	30.8012276148871
Arsenite	7	5	B1	4	-0.280924190327508	0.0976596218058459	0.048829810902923	38.3531645633378
Arsenite	7	6	B1	4	-0.168498891315619	0.0678233960315429	0.0339116980157715	45.6244083934076
Arsenite	7	7	B1	4	-0.0781968240476622	0.0935185758572564	0.0467592879286282	53.0608470600607
Arsenite	7	8	B1	4	-0.182869430313197	0.0172405453271713	0.00862027266358563	60.7562485836646
Arsenite	7	9	B1	4	-0.058835473612827	0.0630625345641006	0.0315312672820503	67.8475143293154
Arsenite	7	10	B1	4	-0.046317226737792	0.108156233674268	0.054078116837134	74.8737533245443
Arsenite	7	11	B1	4	0.011236827833156	0.0904133347681917	0.0452066673840959	81.8827558863643
Arsenite	7	1	B10	4	-0.223772541519318	0.212840482411882	0.106420241205941	7.97008722489823
Arsenite	7	2	B10	4	-0.129643958228636	0.12290712870103	0.0614535643505149	15.4048270736095
Arsenite	7	3	B10	4	-0.155312106052344	0.0179786207840046	0.00898931039200228	22.9903190878212
Arsenite	7	4	B10	3	-0.151507515829162	0.112104537642404	0.0647235849852205	30.6299856283141
Arsenite	7	5	B10	4	-0.137099603755565	0.0574438448193627	0.0287219224096813	38.233877888424
Arsenite	7	6	B10	4	-0.128472906575355	0.146322770818932	0.073161385409466	46.032698992383
Arsenite	7	7	B10	4	-0.130057894787313	0.0488579776038789	0.0244289888019394	53.9114761096749
Arsenite	7	8	B10	4	-0.0573749191643133	0.0509662610463093	0.0254831305231546	61.6876960051925
Arsenite	7	9	B10	4	-0.0309645237646669	0.0596369772326738	0.0298184886163369	68.642029940589
Arsenite	7	10	B10	4	0.00452916607936732	0.0987867313612594	0.0493933656806297	76.0230344237187
Arsenite	7	11	B10	4	0.0360991635809609	0.102338462412759	0.0511692312063795	82.7659207739174
Arsenite	7	1	B11	4	-0.211088131100684	0.103741987484403	0.0518709937422017	8.32406086486606
Arsenite	7	2	B11	3	-0.112713807768554	0.127480877853284	0.0736011191451232	15.4339006330096
Arsenite	7	3	B11	4	-0.0826980944725912	0.130673378082625	0.0653366890413124	22.8775494354341
Arsenite	7	4	B11	4	-0.0642725420061359	0.12055298948421	0.0602764947421049	30.5695298610322
Arsenite	7	5	B11	4	-0.092520988286943	0.0733356881385496	0.0366678440692748	38.1682317674876
Arsenite	7	6	B11	3	-0.0247531462863774	0.0578827977620342	0.0334186488693591	45.4620994010008
Arsenite	7	7	B11	3	-0.0889161588646243	0.183393637331693	0.105882365881118	52.8297052997909
Arsenite	7	8	B11	4	-0.0877047584238674	0.0903117239122527	0.0451558619561264	60.3877317523751
Arsenite	7	9	B11	4	-0.149660363783844	0.0840195715570981	0.0420097857785491	68.2545794742968
Arsenite	7	10	B11	4	-0.308103084035268	0.0606174726196582	0.0303087363098291	76.9739471528054
Arsenite	7	11	B11	4	-0.129142078730158	0.114819430354947	0.0574097151774736	84.5062756959923
Arsenite	7	1	B12	4	-0.19953800524147	0.150481193184416	0.0752405965922078	8.09054059803028
Arsenite	7	2	B12	4	-0.17298206927462	0.102502182432181	0.0512510912160903	15.9875761399056
Arsenite	7	3	B12	4	-0.163958718779975	0.0654646598131261	0.032732329906563	23.4747732487184
Arsenite	7	4	B12	4	-0.128465275840641	0.0782103731897587	0.0391051865948794	31.3614996900456
Arsenite	7	5	B12	4	-0.168577177522128	0.0383688446880847	0.0191844223440424	40.0486658696903
Arsenite	7	6	B12	4	-0.215364641471229	0.0780050844130758	0.0390025422065379	48.7349801236379
Arsenite	7	7	B12	4	-0.189582313517326	0.0471820784354372	0.0235910392177186	57.1387099727804
Arsenite	7	8	B12	4	-0.166658784860638	0.0707574150560102	0.0353787075280051	65.9797155893145
Arsenite	7	9	B12	4	-0.178464461813796	0.0746483010388028	0.0373241505194014	74.3975938043638
Arsenite	7	10	B12	4	-0.0655804911845224	0.092437559244725	0.0462187796223625	83.3439923388187
Arsenite	7	11	B12	4	-0.229753716958906	0.107032905887354	0.0535164529436771	92.1997161523141
Arsenite	7	1	B2	4	-0.387623817378965	0.0674892841115365	0.0337446420557682	8.96111621871383
Arsenite	7	2	B2	4	-0.358308974885926	0.0366943272511799	0.01834716362559	16.8962939544665
Arsenite	7	3	B2	4	-0.302600464670408	0.0542151920744515	0.0271075960372258	24.4723280343918
Arsenite	7	4	B2	4	-0.207119857743741	0.0800704383304197	0.0400352191652098	31.9051381015362
Arsenite	7	5	B2	4	-0.237999761878929	0.064878323090537	0.0324391615452685	39.1517978739066
Arsenite	7	6	B2	4	-0.227731162516048	0.0643644694685115	0.0321822347342558	46.7398489194835
Arsenite	7	7	B2	4	-0.178964055959645	0.0291257901493421	0.014562895074671	54.0332109861662
Arsenite	7	8	B2	4	-0.174043508049273	0.0588063954048528	0.0294031977024264	61.8579483808766
Arsenite	7	9	B2	4	-0.208863923279337	0.0199817567287703	0.00999087836438513	69.6711378351065
Arsenite	7	10	B2	4	-0.238095833852752	0.0906427597224997	0.0453213798612499	77.7296911532923
Arsenite	7	11	B2	4	-0.230877146135916	0.0237382845252118	0.0118691422626059	85.3495213006736
Arsenite	7	1	B3	4	-0.104768781941241	0.0302147725882719	0.015107386294136	7.83580236430617
Arsenite	7	2	B3	4	-0.199783826682538	0.0374825090608004	0.0187412545304002	16.1924407968586
Arsenite	7	3	B3	4	-0.156010850249552	0.065676877009343	0.0328384385046715	23.5213375233678
Arsenite	7	4	B3	4	-0.0365299741391125	0.067714841207194	0.033857420603597	30.8908215827699
Arsenite	7	5	B3	4	-0.0343576652508668	0.0195426800862536	0.0097713400431268	37.9603723402619
Arsenite	7	6	B3	4	-0.0318620149346364	0.0561970815735084	0.0280985407867542	44.7983321451936
Arsenite	7	7	B3	4	0.00408868446125987	0.0553710715185118	0.0276855357592559	51.8250749038659
Arsenite	7	8	B3	4	0.00884791970756427	0.0881132511496564	0.0440566255748282	58.8611677998454
Arsenite	7	9	B3	4	0.031236226343752	0.0898214759479149	0.0449107379739574	65.7829564120967
Arsenite	7	10	B3	4	-0.0149483219450682	0.068075893779375	0.0340379468896875	72.9100449995373
Arsenite	7	11	B3	4	-0.062580098837115	0.0459002198287962	0.0229501099143981	80.389428258221
Arsenite	7	1	B4	4	-0.251914685171944	0.0910854344797025	0.0455427172398512	8.20618584866486
Arsenite	7	2	B4	4	-0.268448250835275	0.0178662501339403	0.00893312506697013	16.5327006362471
Arsenite	7	3	B4	4	-0.185847095614825	0.0629225584882878	0.0314612792441439	24.2573257207337
Arsenite	7	4	B4	4	-0.198081196527357	0.0516148514631175	0.0258074257315588	31.9571895884376
Arsenite	7	5	B4	4	-0.18074844535218	0.0620961939156892	0.0310480969578446	39.6142674891315
Arsenite	7	6	B4	4	-0.144765339894689	0.0610611478789403	0.0305305739394702	47.1996580516478
Arsenite	7	7	B4	4	-0.140477698529133	0.0629034637368236	0.0314517318684118	54.5405514398006
Arsenite	7	8	B4	4	-0.252478851909668	0.0669287958889417	0.0334643979444708	62.6516846472635
Arsenite	7	9	B4	4	-0.23733398703154	0.0455642648058866	0.0227821324029433	70.5514582395021
Arsenite	7	10	B4	4	-0.177640067105836	0.0230258978435677	0.0115129489217839	78.1399921709463
Arsenite	7	11	B4	4	-0.258868783162327	0.0468542323540759	0.023427116177038	86.0794903790777
Arsenite	7	1	B5	4	-0.292118046290014	0.202646557290613	0.101323278645307	8.81759498469396
Arsenite	7	2	B5	4	-0.237741684045358	0.142317729446896	0.0711588647234478	16.3939225548421
Arsenite	7	3	B5	4	-0.113230669396859	0.051717270398074	0.025858635199037	23.9578677760117
Arsenite	7	4	B5	4	-0.177936752152361	0.102380600201912	0.0511903001009558	31.4435912105246
Arsenite	7	5	B5	4	-0.0720537485068526	0.0831784444686598	0.0415892222343299	38.4988277595728
Arsenite	7	6	B5	4	-0.222942550417137	0.0772006436258775	0.0386003218129387	46.285571370689
Arsenite	7	7	B5	4	-0.173234098565572	0.0729995932831542	0.0364997966415771	53.817824803018
Arsenite	7	8	B5	4	-0.186727852680162	0.0214489804485592	0.0107244902242796	61.2521617568255
Arsenite	7	9	B5	4	-0.131263451695746	0.050379508192215	0.0251897540961075	69.1350833795873
Arsenite	7	10	B5	4	-0.132475259543275	0.0602584099027398	0.0301292049513699	76.512419268858
Arsenite	7	11	B5	4	-0.0423536409755874	0.101974453706419	0.0509872268532095	84.0838256166412
Arsenite	7	1	B6	4	-0.161407824572623	0.140899274620583	0.0704496373102914	7.1844001797408
Arsenite	7	2	B6	4	-0.239002434467597	0.0634365134191137	0.0317182567095569	14.4626480577173
Arsenite	7	3	B6	4	-0.131128198580001	0.0283511349104021	0.014175567455201	21.7425479784496
Arsenite	7	4	B6	4	-0.26910326854567	0.132056310208197	0.0660281551040987	28.8033917255016
Arsenite	7	5	B6	4	-0.201401366374507	0.116695164140638	0.0583475820703188	35.9591925690289
Arsenite	7	6	B6	4	-0.195613016600984	0.0887534304318662	0.0443767152159331	43.0015153571076
Arsenite	7	7	B6	4	-0.245812755296647	0.0547179855767783	0.0273589927883892	49.9827898107899
Arsenite	7	8	B6	4	-0.201021896635342	0.117097277904734	0.0585486389523669	56.907491287954
Arsenite	7	9	B6	4	-0.19476321945844	0.150391557792937	0.0751957788964687	64.0292610036645
Arsenite	7	10	B6	4	-0.244467839711926	0.126566402985566	0.0632832014927831	71.2022564328648
Arsenite	7	11	B6	4	-0.187849313814195	0.116888084465546	0.0584440422327728	78.1362684185128
Arsenite	7	1	B7	4	-0.141689903540572	0.143923963257199	0.0719619816285994	7.8496512883595
Arsenite	7	2	B7	4	-0.0537409302006159	0.0874516771440091	0.0437258385720046	14.9322743637136
Arsenite	7	3	B7	4	0.0517105991724921	0.0493271466816158	0.0246635733408079	21.3906677502351
Arsenite	7	4	B7	4	0.0210228054458454	0.107496324657898	0.053748162328949	27.9671208135252
Arsenite	7	5	B7	4	0.102909438771369	0.0349432123516313	0.0174716061758157	34.3692789172408
Arsenite	7	6	B7	4	-0.00881921288975046	0.0812500179579038	0.0406250089789519	41.042756115814
Arsenite	7	7	B7	4	-0.0472504447122496	0.135289115753774	0.067644557876887	47.4523550688416
Arsenite	7	8	B7	4	0.0269261329112381	0.0815441466200583	0.0407720733100291	53.8345823649863
Arsenite	7	9	B7	4	0.0421437989007212	0.0121411224287772	0.00607056121438862	60.1308299596462
Arsenite	7	10	B7	4	0.0224810375293042	0.0657891134586517	0.0328945567293258	66.5241636496056
Arsenite	7	11	B7	4	0.0282422737425537	0.0503252962476619	0.0251626481238309	72.7703576214461
Arsenite	7	1	B8	4	-0.284552546051778	0.258952011743622	0.129476005871811	7.80479726595481
Arsenite	7	2	B8	4	-0.150565454511037	0.0906275446671967	0.0453137723335983	15.331188294518
Arsenite	7	3	B8	4	-0.123442145097458	0.0408297195323843	0.0204148597661921	22.6294980060494
Arsenite	7	4	B8	4	-0.145937192405613	0.0443360723633937	0.0221680361816969	30.0409367281136
Arsenite	7	5	B8	4	-0.0286058684997573	0.0539111503486348	0.0269555751743174	37.2300882642817
Arsenite	7	6	B8	4	0.0333203076496892	0.051612035857953	0.0258060179289765	44.1938496086835
Arsenite	7	7	B8	4	-0.0344553764614677	0.00693707891159295	0.00346853945579647	51.2172538925301
Arsenite	7	8	B8	4	0.0084476615765911	0.0878062926173866	0.0439031463086933	58.1015367363579
Arsenite	7	9	B8	4	-0.000706867615809625	0.0163060847151288	0.00815304235756438	64.8324526564265
Arsenite	7	10	B8	4	0.113748136975409	0.0756823605176022	0.0378411802588011	71.3165299915873
Arsenite	7	11	B8	4	0.0589198634929474	0.0854420508056136	0.0427210254028068	77.736216220695
Arsenite	7	1	B9	4	-0.238827666345138	0.108616700164665	0.0543083500823325	7.89934147874109
Arsenite	7	2	B9	4	-0.0600700123715979	0.0691088273435397	0.0345544136717698	15.2221614717074
Arsenite	7	3	B9	4	-0.179804736904371	0.0707803200129811	0.0353901600064906	22.526716187738
Arsenite	7	4	B9	4	-0.172794011082092	0.0962298336917563	0.0481149168458781	30.0494725822927
Arsenite	7	5	B9	4	-0.0704023185255256	0.117421228543128	0.0587106142715642	36.9906208874369
Arsenite	7	6	B9	4	-0.192321761258854	0.0814141546082489	0.0407070773041244	44.4180571443322
Arsenite	7	7	B9	4	-0.0635781364163878	0.102692741310767	0.0513463706553834	51.3275266009324
Arsenite	7	8	B9	4	-0.0761070947448688	0.0860182026730326	0.0430091013365163	58.1783068051681
Arsenite	7	9	B9	4	-0.126460624544468	0.0742010190595214	0.0371005095297607	64.8716715249277
Arsenite	7	10	B9	4	-0.0483152106063423	0.0640293825598851	0.0320146912799425	71.6490454623221
Arsenite	7	11	B9	4	0.0148697674796791	0.122839806710333	0.0614199033551666	77.9940340852278
Arsenite	7	1	C1	4	-0.287290002335532	0.0876103213003599	0.0438051606501799	7.81027521242535
Arsenite	7	2	C1	4	-0.320608273139766	0.0564417684301593	0.0282208842150796	15.7894422590853
Arsenite	7	3	C1	4	-0.191538686798499	0.126852758195235	0.0634263790976173	23.2421121901081
Arsenite	7	4	C1	4	-0.262162907718988	0.112413291538851	0.0562066457694255	30.725640085825
Arsenite	7	5	C1	4	-0.229392136796344	0.0598164859747368	0.0299082429873684	37.8524035811765
Arsenite	7	6	C1	4	-0.217628110394744	0.0402504894007347	0.0201252447003674	45.1785888883419
Arsenite	7	7	C1	4	-0.185474557824942	0.0245659975912342	0.0122829987956171	52.5282281510218
Arsenite	7	8	C1	4	-0.267094825075566	0.104096952104042	0.0520484760520208	60.3880298397376
Arsenite	7	9	C1	4	-0.286681476471294	0.0593532800036104	0.0296766400018052	67.8025941359025
Arsenite	7	10	C1	4	-0.219305460624244	0.0847224637085116	0.0423612318542558	75.2546873904219
Arsenite	7	11	C1	4	-0.258390026879538	0.0723694294513454	0.0361847147256727	82.7308995499696
Arsenite	7	1	C10	4	-0.213931145816425	0.0156144873948583	0.00780724369742916	8.07837909786029
Arsenite	7	2	C10	4	-0.128437226863422	0.0904969372826398	0.0452484686413199	15.1074879349402
Arsenite	7	3	C10	4	-0.098331675642212	0.0621575871050308	0.0310787935525154	22.4464135873837
Arsenite	7	4	C10	4	-0.0837029073504348	0.0906535915039332	0.0453267957519666	29.4503136034664
Arsenite	7	5	C10	4	-0.0448121688831247	0.0973855684504774	0.0486927842252387	36.4048877713881
Arsenite	7	6	C10	4	-0.189608296998768	0.0494285430888948	0.0247142715444474	43.9342279708845
Arsenite	7	7	C10	4	-0.0622187467152779	0.066186635712202	0.033093317856101	50.8121656700179
Arsenite	7	8	C10	4	-0.0749842956521002	0.067236446422566	0.033618223211283	57.8308599925209
Arsenite	7	9	C10	4	-0.0117540591528181	0.0455453605667363	0.0227726802833682	65.0171405829274
Arsenite	7	10	C10	4	-0.072339359438801	0.109275447134481	0.0546377235672406	71.8602001862234
Arsenite	7	11	C10	4	-0.00634930479916801	0.0464978499023732	0.0232489249511866	78.6358599956508
Arsenite	7	1	C11	4	-0.081416313398913	0.0295602601368905	0.0147801300684453	7.455912830874
Arsenite	7	2	C11	4	-0.0714420051919586	0.0701428242398398	0.0350714121199199	14.6040321878692
Arsenite	7	3	C11	4	-0.0798381827398309	0.0830232647905123	0.0415116323952561	22.0037793340263
Arsenite	7	4	C11	4	-0.0592747629876449	0.139127206197052	0.0695636030985262	29.1772833385228
Arsenite	7	5	C11	4	-0.0623898129602897	0.0335149994267774	0.0167574997133887	36.2455108464292
Arsenite	7	6	C11	4	-0.0866578819965229	0.0724315996211579	0.036215799810579	43.6954133086046
Arsenite	7	7	C11	3	-0.0200706293735363	0.0549785478145382	0.0317418793803783	50.3176918052526
Arsenite	7	8	C11	4	0.00493734373454496	0.12353635876958	0.0617681793847901	57.2212177295062
Arsenite	7	9	C11	4	-0.0608902840886965	0.0952712699812805	0.0476356349906403	64.4011365919671
Arsenite	7	10	C11	4	-0.0573674161612019	0.109597784844913	0.0547988924224566	71.6314291687984
Arsenite	7	11	C11	4	0.0365225370136359	0.0701505136060592	0.0350752568030296	78.4143520743711
Arsenite	7	1	C12	4	-0.112941533294678	0.155239234594715	0.0776196172973574	7.74907547843991
Arsenite	7	2	C12	4	-0.102533881190894	0.0553551693195209	0.0276775846597604	15.0847717135191
Arsenite	7	3	C12	4	-0.118833225412766	0.136594574088127	0.0682972870440637	22.3664877550755
Arsenite	7	4	C12	4	-0.127975655923009	0.131201018527106	0.0656005092635529	29.6706910517226
Arsenite	7	5	C12	4	-0.0287582478658265	0.101562040290056	0.050781020145028	37.1811532166566
Arsenite	7	6	C12	4	-0.0677498140587103	0.199677883471159	0.0998389417355795	44.5556426313146
Arsenite	7	7	C12	4	-0.126357266116525	0.145152460607713	0.0725762303038563	51.4754921380507
Arsenite	7	8	C12	4	-0.0700704883740769	0.210887549621276	0.105443774810638	58.8319409030454
Arsenite	7	9	C12	4	-0.00916736544154539	0.201013121405088	0.100506560702544	66.0107903200607
Arsenite	7	10	C12	4	0.0202784584251194	0.124550334640937	0.0622751673204683	73.3350862038819
Arsenite	7	11	C12	4	-0.0445370391530793	0.156283487194208	0.0781417435971042	80.3320208064222
Arsenite	7	1	C2	4	-0.149680129754683	0.0369402110436301	0.018470105521815	7.84457167639934
Arsenite	7	2	C2	4	-0.229106695457874	0.0527128516817975	0.0263564258408987	16.0411848349026
Arsenite	7	3	C2	4	-0.0468136279603351	0.0795837277574345	0.0397918638787172	23.4830255847486
Arsenite	7	4	C2	4	-0.168803218029691	0.031934921800154	0.015967460900077	31.3389555625956
Arsenite	7	5	C2	4	-0.0768825669064643	0.187155822930404	0.0935779114652019	38.5528416772047
Arsenite	7	6	C2	4	-0.0858932552735023	0.119412658087267	0.0597063290436337	45.9013021757736
Arsenite	7	7	C2	4	-0.00989452736614521	0.0902658000859073	0.0451329000429537	53.1864562228099
Arsenite	7	8	C2	4	-0.113470150638188	0.0583494532662504	0.0291747266331252	60.7738416138173
Arsenite	7	9	C2	3	0.0172362215559735	0.11838730567943	0.0683509428026534	68.3313371564818
Arsenite	7	10	C2	4	-0.0779166586657257	0.107804502639288	0.0539022513196442	75.8265153358566
Arsenite	7	11	C2	4	0.0288219288250966	0.0185438642349211	0.00927193211746056	83.4344321483314
Arsenite	7	1	C3	4	-0.135529497852365	0.0355651222294496	0.0177825611147248	7.73650072367762
Arsenite	7	2	C3	4	-0.154084582374039	0.0997546278919988	0.0498773139459994	15.4983564815099
Arsenite	7	3	C3	4	-0.0942691107161567	0.0411700364497174	0.0205850182248587	23.1998785032173
Arsenite	7	4	C3	4	-0.100700578940413	0.0341616982128663	0.0170808491064332	30.7019109771904
Arsenite	7	5	C3	4	-0.0251277566044629	0.052590966680226	0.026295483340113	37.7969253222588
Arsenite	7	6	C3	4	-0.102541320485419	0.122787467415706	0.0613937337078531	45.385715803701
Arsenite	7	7	C3	4	-0.0448817211758877	0.123976439333767	0.0619882196668837	52.671663968188
Arsenite	7	8	C3	4	-0.0363861100312976	0.041545820249985	0.0207729101249925	59.7802841134446
Arsenite	7	9	C3	4	0.000861146374193544	0.0742532431119566	0.0371266215559783	67.0087598226159
Arsenite	7	10	C3	4	-0.00274224098070186	0.0884687712181037	0.0442343856090518	74.3336049093059
Arsenite	7	11	C3	4	-0.0286182728068808	0.0290824780844905	0.0145412390422452	81.903078925519
Arsenite	7	1	C4	4	-0.558258472093441	0.0491753583597581	0.024587679179879	9.47256952304962
Arsenite	7	2	C4	4	-0.409926146003948	0.0325995283965752	0.0162997641982876	18.1114835798884
Arsenite	7	3	C4	4	-0.390292791679639	0.0317974345472221	0.0158987172736111	26.5860117913395
Arsenite	7	4	C4	4	-0.444224305430346	0.0341736380570415	0.0170868190285207	34.9873601384556
Arsenite	7	5	C4	4	-0.454679289273673	0.0882468713567013	0.0441234356783506	43.7722625272984
Arsenite	7	6	C4	4	-0.452449295646369	0.0443322499698286	0.0221661249849143	52.391670505739
Arsenite	7	7	C4	4	-0.411638020971934	0.0271533087942081	0.0135766543971041	60.671612821261
Arsenite	7	8	C4	4	-0.561783131414342	0.113132696286962	0.0565663481434812	69.6204718873179
Arsenite	7	9	C4	3	-0.536655417440769	0.0913415582667291	0.0527360732534959	79.14777723237
Arsenite	7	10	C4	4	-0.484265408556606	0.0321237186076822	0.0160618593038411	88.2606735212637
Arsenite	7	11	C4	4	-0.47867524734398	0.0178160613614986	0.00890803068074928	97.307548135721
Arsenite	7	1	C5	4	-0.143717201341845	0.0716534576818673	0.0358267288409336	7.7546058002989
Arsenite	7	2	C5	4	-0.200268091672604	0.067888246065121	0.0339441230325605	15.8987677052611
Arsenite	7	3	C5	4	-0.0393602575491903	0.0822376218716285	0.0411188109358143	23.2394624121092
Arsenite	7	4	C5	3	-0.0171800839190722	0.0926044447577786	0.0534652011090593	30.2911069269665
Arsenite	7	5	C5	4	-0.0485434628956065	0.0677135131527716	0.0338567565763858	37.5002351909556
Arsenite	7	6	C5	4	-0.0523618231537034	0.0971395452994127	0.0485697726497063	44.9318546965281
Arsenite	7	7	C5	4	-0.0382031661758671	0.0348623495160778	0.0174311747580389	52.158413896611
Arsenite	7	8	C5	4	-0.0998902288880774	0.082467883594992	0.041233941797496	59.8713676289959
Arsenite	7	9	C5	4	-0.0728457113050995	0.0347793445980352	0.0173896722990176	67.2398529175775
Arsenite	7	10	C5	4	-0.0214078663500132	0.114926853940223	0.0574634269701114	74.5392904967761
Arsenite	7	11	C5	4	-0.109701312066212	0.0608981750254992	0.0304490875127496	82.171718159382
Arsenite	7	1	C6	4	-0.0801825809639323	0.0940217784206159	0.047010889210308	7.69671266506358
Arsenite	7	2	C6	4	0.0465821156353373	0.0924153083617449	0.0462076541808724	14.6962627890186
Arsenite	7	3	C6	4	-0.0874856668983365	0.0581436838405875	0.0290718419202937	22.1661604316249
Arsenite	7	4	C6	4	-0.0307727686909401	0.0894224964971783	0.0447112482485892	29.1654464978305
Arsenite	7	5	C6	4	0.00491420325740355	0.0337321946573115	0.0168660973286557	36.3135346893308
Arsenite	7	6	C6	4	0.147698747225212	0.075450388220279	0.0377251941101395	42.7340604359826
Arsenite	7	7	C6	4	-0.0483880420633522	0.0971029519582567	0.0485514759791284	49.8928406740329
Arsenite	7	8	C6	4	-0.0058802821435211	0.0449427861856826	0.0224713930928413	56.8419480016467
Arsenite	7	9	C6	4	-0.0138444178216223	0.126289676522685	0.0631448382613425	64.1710512881711
Arsenite	7	10	C6	4	-0.0333319928177923	0.0542611384693301	0.0271305692346651	71.1760972747288
Arsenite	7	11	C6	4	0.0445865666759072	0.120694397269853	0.0603471986349267	78.0644199184829
Arsenite	7	1	C7	4	-0.134253107857414	0.0797452322376183	0.0398726161188092	7.91699402845285
Arsenite	7	2	C7	4	-0.103179804331882	0.0619536221838012	0.0309768110919006	15.5279836249897
Arsenite	7	3	C7	4	-0.00689569767187331	0.0406171992801307	0.0203085996400654	22.9815691125414
Arsenite	7	4	C7	4	-0.0571806678462373	0.0257407851324312	0.0128703925662156	30.2231957726736
Arsenite	7	5	C7	4	-0.0288005747539462	0.0236271776555211	0.0118135888277605	37.2076640415042
Arsenite	7	6	C7	4	-0.0178325085368657	0.0337968217180629	0.0168984108590314	44.3130374504526
Arsenite	7	7	C7	4	-0.0262320051283055	0.114022003914086	0.057011001957043	51.5464907954977
Arsenite	7	8	C7	4	-0.0436270301945946	0.085216981731252	0.042608490865626	58.937394981452
Arsenite	7	9	C7	4	0.00163239588729802	0.135575475469695	0.0677877377348477	66.2072743749757
Arsenite	7	10	C7	4	-0.0236888504014341	0.0988884604461748	0.0494442302230874	73.39031072234
Arsenite	7	11	C7	4	0.0804778919665173	0.0669572423903729	0.0334786211951865	80.2278403575384
Arsenite	7	1	C8	4	-0.264845912760603	0.095502344974886	0.047751172487443	8.06652823929381
Arsenite	7	2	C8	4	-0.189282674899237	0.0731261828520357	0.0365630914260179	15.7974350741036
Arsenite	7	3	C8	4	-0.208408627843325	0.0559758888766941	0.027987944438347	23.2121689926171
Arsenite	7	4	C8	4	-0.0257617603947443	0.087997214581802	0.043998607290901	30.3061043018456
Arsenite	7	5	C8	4	-0.143727650243936	0.0396825224388927	0.0198412612194464	37.3695828238698
Arsenite	7	6	C8	4	-0.194377989672613	0.0490651977761767	0.0245325988880884	44.9872888800881
Arsenite	7	7	C8	4	-0.112155206162493	0.0720314343290104	0.0360157171645052	52.2717987536817
Arsenite	7	8	C8	4	-0.209269459247755	0.124064175308297	0.0620320876541486	59.9264799020445
Arsenite	7	9	C8	4	-0.175386233077744	0.0323761413302022	0.0161880706651011	67.3555764027962
Arsenite	7	10	C8	4	-0.165080682633763	0.0759851805936984	0.0379925902968492	74.9268025892528
Arsenite	7	11	C8	4	-0.121941058509399	0.0861466784171236	0.0430733392085618	82.2540754601269
Arsenite	7	1	C9	4	-0.156426249213423	0.0743178178639653	0.0371589089319826	7.01164018723504
Arsenite	7	2	C9	4	-0.170534447826687	0.0834101765482453	0.0417050882741227	13.9404789163695
Arsenite	7	3	C9	4	-0.181176189716824	0.0419876152998545	0.0209938076499272	21.0535536555149
Arsenite	7	4	C9	4	-0.233771182740992	0.118709620812281	0.0593548104061405	28.2157448904795
Arsenite	7	5	C9	4	-0.187356228806848	0.134699769522831	0.0673498847614154	35.2243003695903
Arsenite	7	6	C9	4	-0.200136115671052	0.126753853928278	0.0633769269641389	42.2305234036547
Arsenite	7	7	C9	4	-0.155427149344587	0.104299812943345	0.0521499064716724	49.1423048947014
Arsenite	7	8	C9	4	-0.250776110553126	0.161860905979777	0.0809304529898884	56.3791848039895
Arsenite	7	9	C9	4	-0.193135898030834	0.108209281367757	0.0541046406838784	63.6216830805501
Arsenite	7	10	C9	4	-0.164044171726141	0.108980471651493	0.0544902358257467	70.6145458863886
Arsenite	7	11	C9	4	-0.156722289886607	0.0711070153843878	0.0355535076921939	77.4673595372306
Arsenite	7	1	D1	4	-0.347263155113534	0.106507883133826	0.0532539415669128	8.40620563984609
Arsenite	7	2	D1	4	-0.207337842927209	0.0374825131051261	0.018741256552563	16.4437287341117
Arsenite	7	3	D1	4	-0.220358915653152	0.0790202461486243	0.0395101230743121	24.4781992423072
Arsenite	7	4	D1	4	-0.209309274878157	0.148893439549668	0.0744467197748341	32.6835970129971
Arsenite	7	5	D1	4	-0.143551847045115	0.0964965123970113	0.0482482561985057	40.1757213753095
Arsenite	7	6	D1	4	-0.234237613106737	0.0294698789109323	0.0147349394554661	48.4302805980756
Arsenite	7	7	D1	4	-0.184882593976024	0.0565859329745653	0.0282929664872827	56.6328673331218
Arsenite	7	8	D1	4	-0.256220593989223	0.0457998947149975	0.0228999473574988	64.9832007280813
Arsenite	7	9	D1	4	-0.200936882564108	0.0316159844112446	0.0158079922056223	72.7449621478073
Arsenite	7	10	D1	4	-0.304449618481854	0.0536005274941818	0.0268002637470909	80.5156249947543
Arsenite	7	11	D1	4	-0.234349584027897	0.0414371506694757	0.0207185753347378	88.9870268306438
Arsenite	7	1	D10	4	-0.134321716948615	0.114337291664187	0.0571686458320933	7.90898364495835
Arsenite	7	2	D10	4	-0.0659123325388519	0.0426913508520239	0.0213456754260119	14.9706906255321
Arsenite	7	3	D10	3	-0.0921415315180711	0.0440082752972043	0.0254081895894121	21.7833303193312
Arsenite	7	4	D10	4	-0.03080069904485	0.0468475789745091	0.0234237894872546	29.0930238408238
Arsenite	7	5	D10	4	-0.0416786695767319	0.0691593000694949	0.0345796500347474	36.4110432593446
Arsenite	7	6	D10	4	-0.108132651023861	0.0377381289447908	0.0188690644723954	44.1051214108039
Arsenite	7	7	D10	4	-0.00896442814647563	0.0453324931705751	0.0226662465852875	50.9935511367582
Arsenite	7	8	D10	4	0.0385957072048489	0.0734613203791877	0.0367306601895939	58.0775375999844
Arsenite	7	9	D10	3	0.0318441710588109	0.0322608466093923	0.0186258084742179	64.7149427038051
Arsenite	7	10	D10	4	0.0328605116016831	0.152875423392398	0.0764377116961992	72.012353671816
Arsenite	7	11	D10	3	-0.0241129076119135	0.0314422568180198	0.0181531954378131	78.8154901163943
Arsenite	7	1	D11	3	-0.0436048940667592	0.0499851635117595	0.0288589476090018	7.12031204652699
Arsenite	7	2	D11	4	-0.04131681618391	0.0512511571053031	0.0256255785526516	14.4868678152433
Arsenite	7	3	D11	3	-0.0515294046247462	0.06653289628593	0.0384127855806471	21.5657033623965
Arsenite	7	4	D11	4	-0.0701893165106567	0.0612008164695459	0.030600408234773	29.2945523662578
Arsenite	7	5	D11	4	0.0352426396964616	0.0317874277622114	0.0158937138811057	36.5608720423169
Arsenite	7	6	D11	4	-0.0781810335527192	0.0859637600816899	0.0429818800408449	43.8948212154909
Arsenite	7	7	D11	4	0.0139991549472176	0.0669047650179762	0.0334523825089881	51.1985624675129
Arsenite	7	8	D11	4	0.0256644675044715	0.0827029491679551	0.0413514745839776	58.5672637217461
Arsenite	7	9	D11	4	-0.121555723603042	0.0366857751306849	0.0183428875653425	66.3722735562693
Arsenite	7	10	D11	4	0.0211428845841571	0.104507058850178	0.0522535294250891	73.6567103756576
Arsenite	7	11	D11	4	0.0404294889249481	0.0497026309849043	0.0248513154924521	80.6181632326775
Arsenite	7	1	D12	4	-0.163287349127492	0.0893012100515661	0.0446506050257831	8.78120019749927
Arsenite	7	2	D12	4	-0.043288607858521	0.0677423769399325	0.0338711884699663	16.2834061160831
Arsenite	7	3	D12	4	-0.0715965329670751	0.114066509120056	0.0570332545600279	24.0060804768972
Arsenite	7	4	D12	4	-0.0480179696175276	0.11546427330398	0.0577321366519902	31.8253877947695
Arsenite	7	5	D12	4	-0.0199873521007577	0.0623546088485358	0.0311773044242679	40.2012991209626
Arsenite	7	6	D12	4	-0.0250366609952506	0.115174655216931	0.0575873276084656	48.2807200214434
Arsenite	7	7	D12	4	0.0104052824901865	0.0644318202109706	0.0322159101054853	55.6116115714288
Arsenite	7	8	D12	4	-0.0940373941175062	0.120622164706486	0.0603110823532431	63.9257815001154
Arsenite	7	9	D12	4	-0.00215302112191135	0.153317314785016	0.0766586573925079	72.0061450657702
Arsenite	7	10	D12	4	0.0422700730058764	0.0701368246190366	0.0350684123095183	79.9734150021144
Arsenite	7	11	D12	4	0.0534548968936363	0.109327526814629	0.0546637634073145	87.4436773224659
Arsenite	7	1	D2	4	-0.198655580275387	0.062648327539306	0.031324163769653	7.47446196750769
Arsenite	7	2	D2	4	-0.169780863404917	0.0377151156457622	0.0188575578228811	14.8650559580063
Arsenite	7	3	D2	4	-0.146224870583413	0.0288442779906838	0.0144221389953419	22.1934099911989
Arsenite	7	4	D2	4	-0.0753214337279469	0.0938768840194666	0.0469384420097333	29.2398290944578
Arsenite	7	5	D2	4	-0.163179149375883	0.0563868146588042	0.0281934073294021	36.2019168126261
Arsenite	7	6	D2	4	-0.0766138820469067	0.0639199221131173	0.0319599610565586	43.2552588292992
Arsenite	7	7	D2	4	-0.0260462427159456	0.0352042620425186	0.0176021310212593	50.0096560451995
Arsenite	7	8	D2	4	-0.0431511112907137	0.0385124378663758	0.0192562189331879	56.832142770919
Arsenite	7	9	D2	4	-0.136132020249747	0.0279383928654707	0.0139691964327353	63.5350425941192
Arsenite	7	10	D2	4	-0.137776084363081	0.0879941440517396	0.0439970720258698	70.7104433535104
Arsenite	7	11	D2	4	0.0555672185715331	0.0500617649757208	0.0250308824878604	77.0076329891982
Arsenite	7	1	D3	4	-0.0625113945502108	0.0509089202140597	0.0254544601070299	7.10481566003534
Arsenite	7	2	D3	4	-0.0690313935003615	0.0529850580523406	0.0264925290261703	14.3472342863808
Arsenite	7	3	D3	4	-0.0659365811108585	0.0822975343971954	0.0411487671985977	21.3247766239296
Arsenite	7	4	D3	4	-0.0120505381342534	0.0848960011269992	0.0424480005634996	28.3386313576175
Arsenite	7	5	D3	4	0.0182881183161404	0.0466432094835307	0.0233216047417654	35.1851255453756
Arsenite	7	6	D3	4	-0.0524665480153329	0.0658035297084602	0.0329017648542301	42.2543471018113
Arsenite	7	7	D3	4	0.0311843858421497	0.123989402959069	0.0619947014795343	49.1342867321029
Arsenite	7	8	D3	4	-0.0824205618254233	0.0223150724927732	0.0111575362463866	56.3036553380264
Arsenite	7	9	D3	4	0.0307396559629818	0.0460442073678378	0.0230221036839189	63.0216613561764
Arsenite	7	10	D3	4	-0.0215121321574824	0.0927979190296019	0.0463989595148009	70.0640208430159
Arsenite	7	11	D3	4	-0.00451806130253302	0.0715962602826036	0.0357981301413018	76.9994322009376
Arsenite	7	1	D4	4	-0.0969995306828139	0.0845490921029639	0.042274546051482	7.28451172534834
Arsenite	7	2	D4	4	-0.0933362057255344	0.0267230863087244	0.0133615431543622	14.371494235044
Arsenite	7	3	D4	4	-0.0428935985178658	0.0637766510467756	0.0318883255233878	21.3227444290691
Arsenite	7	4	D4	4	-0.0506293992587226	0.0258810799130946	0.0129405399565473	28.409124622737
Arsenite	7	5	D4	4	0.00138746040415494	0.047645040952482	0.023822520476241	35.3416050827606
Arsenite	7	6	D4	4	-0.0659410319137874	0.026477225155329	0.0132386125776645	42.4893612764301
Arsenite	7	7	D4	4	0.0197297044217478	0.0922694052056166	0.0461347026028083	49.308757670325
Arsenite	7	8	D4	4	-0.183854850269258	0.0805322824809884	0.0402661412404942	57.1008510998132
Arsenite	7	9	D4	4	0.0190353497073914	0.0290486541190202	0.0145243270595101	63.5466206214726
Arsenite	7	10	D4	4	-0.0194571338149472	0.0412555658445045	0.0206277829222523	70.6560576737117
Arsenite	7	11	D4	4	-0.0173082299711989	0.0881741253134851	0.0440870626567426	77.3068697261378
Arsenite	7	1	D5	4	-0.0019022812073709	0.0512390847946116	0.0256195423973058	7.04066693011641
Arsenite	7	2	D5	4	-0.0696397248731213	0.0559554008670499	0.0279777004335249	14.4592401194003
Arsenite	7	3	D5	4	-0.0709239650376917	0.0642145859459309	0.0321072929729654	21.5310225822627
Arsenite	7	4	D5	4	-0.00614915770551872	0.0899294774506925	0.0449647387253463	28.6524577224587
Arsenite	7	5	D5	4	0.0925986928721407	0.0750993210823104	0.0375496605411552	35.699064178714
Arsenite	7	6	D5	4	0.100748071258045	0.118140258470363	0.0590701292351813	42.6264099346925
Arsenite	7	7	D5	4	0.113191093513833	0.0596118443599373	0.0298059221799686	49.4472649111343
Arsenite	7	8	D5	4	0.0238890610863852	0.0440780575353019	0.022039028767651	56.8321175803717
Arsenite	7	9	D5	4	0.0908782556008312	0.0591818656619434	0.0295909328309717	63.736443829514
Arsenite	7	10	D5	4	0.0553065985914924	0.039483639440774	0.019741819720387	71.005605561909
Arsenite	7	11	D5	4	0.0552383737442753	0.0162672734728866	0.00813363673644331	78.0192687715013
Arsenite	7	1	D6	4	-0.147312842468323	0.0420718463259604	0.0210359231629802	7.99926743586986
Arsenite	7	2	D6	4	-0.0370574289751999	0.102961509537118	0.0514807547685592	15.5623163067677
Arsenite	7	3	D6	4	0.0155549863325117	0.0499525155026383	0.0249762577513191	22.6507473968261
Arsenite	7	4	D6	4	-0.0227518357319485	0.072172886606656	0.036086443303328	30.0473320133056
Arsenite	7	5	D6	4	-0.00200826993305414	0.0342236132147156	0.0171118066073578	37.0958799749577
Arsenite	7	6	D6	4	-0.00144849086670112	0.0959285322683189	0.0479642661341595	44.4384508098946
Arsenite	7	7	D6	4	0.0123037417345276	0.064174945946792	0.032087472973396	51.6203123217764
Arsenite	7	8	D6	4	-0.058164184750295	0.0197804601852203	0.00989023009261015	59.343590962662
Arsenite	7	9	D6	4	-0.0121161211299856	0.0635541535391687	0.0317770767695843	66.4769022065629
Arsenite	7	10	D6	4	-0.0406261965235137	0.0588348952382557	0.0294174476191278	74.0060300358903
Arsenite	7	11	D6	4	0.0626849908683613	0.102211761167631	0.0511058805838156	81.0423225480826
Arsenite	7	1	D7	4	-0.202554388122229	0.0970967222860581	0.0485483611430291	7.93509930891782
Arsenite	7	2	D7	4	-0.0454431767520618	0.049710119553538	0.024855059776769	15.006874403396
Arsenite	7	3	D7	4	-0.0962134450540502	0.034618410212094	0.017309205106047	22.2312731651641
Arsenite	7	4	D7	4	-0.0249518998255425	0.0358484430222719	0.0179242215111359	29.4652631477693
Arsenite	7	5	D7	4	-0.074654368726754	0.0333505538212627	0.0166752769106314	36.6237079063865
Arsenite	7	6	D7	4	-0.0655724438174808	0.0538582325976611	0.0269291162988306	43.7801575647346
Arsenite	7	7	D7	4	-0.0245616214296318	0.0976596050321531	0.0488298025160765	51.1574238737326
Arsenite	7	8	D7	4	-0.0445633005949364	0.0672626529596633	0.0336313264798316	58.523924278875
Arsenite	7	9	D7	4	-0.052063733765558	0.038709685159343	0.0193548425796715	65.6372794901304
Arsenite	7	10	D7	4	-0.0832822204166201	0.0693740442520561	0.0346870221260281	73.1126132076539
Arsenite	7	11	D7	4	-0.00198386412093987	0.0487974901029518	0.0243987450514759	80.1137068101169
Arsenite	7	1	D8	4	-0.199003000219161	0.107872113534177	0.0539360567670886	7.15311805159178
Arsenite	7	2	D8	4	-0.129512914862207	0.0575841111937638	0.0287920555968819	14.2306056689279
Arsenite	7	3	D8	4	-0.141061261858135	0.082936047295622	0.041468023647811	21.1760256394448
Arsenite	7	4	D8	4	-0.117738215316566	0.0823989703194444	0.0411994851597222	28.051452606503
Arsenite	7	5	D8	4	-0.0997087362110281	0.0719004484215181	0.035950224210759	34.9343880159482
Arsenite	7	6	D8	4	-0.167620008802235	0.0965743253771578	0.0482871626885789	41.9372408022052
Arsenite	7	7	D8	4	-0.116348933714165	0.128540916921949	0.0642704584609747	48.7035597769844
Arsenite	7	8	D8	4	-0.273258571981659	0.119855965299734	0.059927982649867	56.1924364520227
Arsenite	7	9	D8	4	-0.208292497217606	0.150109098962418	0.0750545494812088	63.3218781108677
Arsenite	7	10	D8	4	-0.150910922914336	0.0839597493765821	0.041979874688291	70.2600681995984
Arsenite	7	11	D8	4	-0.0756881728405001	0.0908078094022585	0.0454039047011292	76.8633128663522
Arsenite	7	1	D9	4	-0.0943900700228367	0.0448717633178517	0.0224358816589258	7.31520105642417
Arsenite	7	2	D9	4	-0.0619707369850021	0.0760627120627132	0.0380313560313566	14.4448014848822
Arsenite	7	3	D9	4	-0.143195766704772	0.0549453341643691	0.0274726670821846	21.8095704001052
Arsenite	7	4	D9	4	-0.0507798735474289	0.0722154804569525	0.0361077402284763	29.0351313712191
Arsenite	7	5	D9	4	-0.11391025831907	0.119557369575448	0.0597786847877239	36.5008802278107
Arsenite	7	6	D9	4	-0.109715264985435	0.0969926429334562	0.0484963214667281	43.863013572775
Arsenite	7	7	D9	4	0.013742714431228	0.0877727237094015	0.0438863618547007	50.8756584368041
Arsenite	7	8	D9	3	0.00317750469250585	0.0607842539424005	0.0350938053761355	57.7415642393138
Arsenite	7	9	D9	4	-0.0948064694988718	0.0820070794668193	0.0410035397334096	64.849500978081
Arsenite	7	10	D9	4	-0.0287299096760441	0.0977878264306852	0.0488939132153426	71.8370669030458
Arsenite	7	11	D9	4	0.0289714550728929	0.104441787851819	0.0522208939259096	78.6629636340834
Arsenite	7	1	E1	4	-0.293619326430514	0.0242329882865497	0.0121164941432748	7.68669221670328
Arsenite	7	2	E1	4	-0.221099526092679	0.0594862373132005	0.0297431186566002	15.3628353717954
Arsenite	7	3	E1	4	-0.21362450014817	0.00686687740266669	0.00343343870133334	23.0009821956463
Arsenite	7	4	E1	4	-0.21511479282656	0.0136914676148765	0.00684573380743827	30.7146248294634
Arsenite	7	5	E1	4	-0.153265271965461	0.0208418780361602	0.0104209390180801	38.3938132004896
Arsenite	7	6	E1	4	-0.151469600870708	0.0597066549695665	0.0298533274847833	46.1763576163632
Arsenite	7	7	E1	4	-0.045424485147067	0.0452605204945247	0.0226302602472623	53.8969834576001
Arsenite	7	8	E1	4	-0.129131047839456	0.0232382914349415	0.0116191457174707	62.0131061919035
Arsenite	7	9	E1	4	-0.0901196012457082	0.0627899996748754	0.0313949998374377	69.9552095510517
Arsenite	7	10	E1	4	-0.148321619835484	0.0402964948216336	0.0201482474108168	78.0093152278377
Arsenite	7	11	E1	4	-0.128710305502996	0.0829958458320876	0.0414979229160438	86.1010933900831
Arsenite	7	1	E10	4	-0.206022159657995	0.131618780891073	0.0658093904455366	7.03307658248496
Arsenite	7	2	E10	4	-0.201202510446366	0.0858915920428661	0.042945796021433	13.9303275217444
Arsenite	7	3	E10	4	-0.24727073314195	0.117193022059905	0.0585965110299526	20.8638794744922
Arsenite	7	4	E10	4	-0.161840237724219	0.108057185623171	0.0540285928115856	27.7548889602106
Arsenite	7	5	E10	4	-0.190917437589292	0.151690811335027	0.0758454056675134	34.7902671561587
Arsenite	7	6	E10	4	-0.188929634796803	0.101179923379825	0.0505899616899127	41.8464393920053
Arsenite	7	7	E10	4	-0.198637353918783	0.0998654135833649	0.0499327067916825	48.8766552087138
Arsenite	7	8	E10	4	-0.219943622969759	0.102450671223411	0.0512253356117057	56.1791521696682
Arsenite	7	9	E10	4	-0.202703989207458	0.0954064382773401	0.0477032191386701	63.2970804870483
Arsenite	7	10	E10	4	-0.180622895675842	0.135179752730733	0.0675898763653665	70.469794002182
Arsenite	7	11	E10	4	-0.229309602674262	0.119320309356007	0.0596601546780035	77.3615550933055
Arsenite	7	1	E11	4	-0.191325864621533	0.0458885810412361	0.0229442905206181	8.13765561223897
Arsenite	7	2	E11	4	-0.213993343725578	0.053655916275432	0.026827958137716	15.9466021189593
Arsenite	7	3	E11	4	-0.136631877961163	0.0816683420379872	0.0408341710189936	23.5269705591036
Arsenite	7	4	E11	4	-0.0999234722435857	0.0646236934515877	0.0323118467257938	30.9949971136927
Arsenite	7	5	E11	4	-0.0829379560174522	0.0815261357938194	0.0407630678969097	38.539126403547
Arsenite	7	6	E11	4	-0.180421012017258	0.04448783917026	0.02224391958513	46.5706965639274
Arsenite	7	7	E11	4	0.00201269092000311	0.0524034304538502	0.0262017152269251	53.5040238124136
Arsenite	7	8	E11	4	-0.0698573252267851	0.0873460743343431	0.0436730371671716	61.0558584560988
Arsenite	7	9	E11	3	-0.0668739406026223	0.178255240867138	0.102915711299104	68.279951754227
Arsenite	7	10	E11	4	-0.0201833082387494	0.0728865406439737	0.0364432703219869	75.7640360181054
Arsenite	7	11	E11	4	-0.0203748971169194	0.0618703086791614	0.0309351543395807	82.9063537388788
Arsenite	7	1	E12	4	-0.100117361680828	0.300816708820029	0.150408354410015	7.60636062218185
Arsenite	7	2	E12	4	-0.145563106197776	0.176696666879093	0.0883483334395466	15.0821943508008
Arsenite	7	3	E12	4	-0.105204421223734	0.0925064610147014	0.0462532305073507	22.2646611450297
Arsenite	7	4	E12	4	-0.109321091353561	0.196220886281695	0.0981104431408476	29.5865506339823
Arsenite	7	5	E12	4	-0.0639965841088361	0.171439387995896	0.085719693997948	36.9459486605733
Arsenite	7	6	E12	4	-0.0627733675567742	0.233137393055105	0.116568696527552	44.2622747968311
Arsenite	7	7	E12	4	-0.129852676237481	0.171442170404369	0.0857210852021846	51.5293669202436
Arsenite	7	8	E12	4	-0.0527420729324945	0.197661473729389	0.0988307368646943	58.9129610162711
Arsenite	7	9	E12	4	-0.07423140822936	0.187228348644101	0.0936141743220504	66.1319196103698
Arsenite	7	10	E12	4	-0.0395490318623995	0.149461462213517	0.0747307311067587	73.5053165701035
Arsenite	7	11	E12	4	-0.0372190183681671	0.173788259617172	0.086894129808586	80.5146536041849
Arsenite	7	1	E2	4	-0.102049751479312	0.0752288681376129	0.0376144340688064	7.75491081155529
Arsenite	7	2	E2	4	-0.151003451967637	0.064016816060486	0.032008408030243	15.8258378277671
Arsenite	7	3	E2	4	-0.106265033698254	0.0449937639803289	0.0224968819901644	23.3711769705993
Arsenite	7	4	E2	4	-0.0399956124337975	0.0209626003164914	0.0104813001582457	30.7382583883572
Arsenite	7	5	E2	4	-0.0606087178221866	0.0601310318948065	0.0300655159474033	37.8910210806394
Arsenite	7	6	E2	4	-0.0552150391708229	0.0654787884265573	0.0327393942132786	45.0708342201668
Arsenite	7	7	E2	4	-0.0361771606605866	0.112040866950128	0.0560204334750642	52.4740917298977
Arsenite	7	8	E2	4	-0.104625286629654	0.0861873309965827	0.0430936654982914	59.8505587115373
Arsenite	7	9	E2	4	-0.0441187235658133	0.0436286509487532	0.0218143254743766	67.0596601367729
Arsenite	7	10	E2	4	-0.0439265552286826	0.0718236949587283	0.0359118474793642	74.1384390399861
Arsenite	7	11	E2	4	0.0221062269357479	0.0666866695487775	0.0333433347743887	81.327824530296
Arsenite	7	1	E3	4	-0.226377967209395	0.136263676271647	0.0681318381358236	6.91516103890531
Arsenite	7	2	E3	4	-0.236024356968494	0.182814333116645	0.0914071665583223	13.9407360840058
Arsenite	7	3	E3	4	-0.176740233055781	0.0655265643464825	0.0327632821732413	20.87725956745
Arsenite	7	4	E3	4	-0.166243122636167	0.0520170443551674	0.0260085221775837	27.6934648913775
Arsenite	7	5	E3	4	-0.160690706827441	0.0920368468102641	0.046018423405132	34.4167510978136
Arsenite	7	6	E3	4	-0.163981344430557	0.0932510830436397	0.0466255415218199	41.2060189219699
Arsenite	7	7	E3	4	-0.200982584426477	0.0525082913937967	0.0262541456968984	48.1119476632192
Arsenite	7	8	E3	4	-0.16316098537777	0.0654502146653532	0.0327251073326766	55.0129152077116
Arsenite	7	9	E3	4	-0.110493241952176	0.0521543231197142	0.0260771615598571	61.7904908463142
Arsenite	7	10	E3	4	-0.146187691858081	0.114726072365686	0.0573630361828431	68.6957680050559
Arsenite	7	11	E3	4	-0.182641652040093	0.0642125519396445	0.0321062759698223	75.4239862823884
Arsenite	7	1	E4	4	-0.254207161910369	0.164029729902348	0.0820148649511739	7.14573055031783
Arsenite	7	2	E4	4	-0.228369121392692	0.163253037717102	0.0816265188585511	14.0639647284495
Arsenite	7	3	E4	4	-0.126994267965931	0.117730148280468	0.0588650741402339	20.8523673669379
Arsenite	7	4	E4	4	-0.110581704378558	0.0935681555911754	0.0467840777955877	27.5538381898919
Arsenite	7	5	E4	4	-0.197887208376949	0.155784978501581	0.0778924892507904	34.436913781782
Arsenite	7	6	E4	4	-0.150764833527294	0.127913499639782	0.063956749819891	41.1633332463283
Arsenite	7	7	E4	4	-0.0625233046646716	0.0694061292718865	0.0347030646359432	47.765762368466
Arsenite	7	8	E4	4	-0.224641817242899	0.116938484732508	0.0584692423662541	54.9022854437581
Arsenite	7	9	E4	4	-0.285988372924146	0.168186158460177	0.0840930792300887	62.0059493601438
Arsenite	7	10	E4	4	-0.24838308902358	0.146203310392694	0.0731016551963471	69.2756117323559
Arsenite	7	11	E4	4	-0.17062837070397	0.147041933512225	0.0735209667561125	75.8989726558351
Arsenite	7	1	E5	4	-0.217930021178687	0.101928706780504	0.0509643533902518	7.43556567608393
Arsenite	7	2	E5	4	-0.123851080677324	0.0515567274086156	0.0257783637043078	14.5727426155118
Arsenite	7	3	E5	4	-0.136131567304843	0.0497453956773182	0.0248726978386591	21.6604827355028
Arsenite	7	4	E5	4	-0.0260820585794641	0.041041189754001	0.0205205948770005	28.7442807270128
Arsenite	7	5	E5	4	-0.0842206932728113	0.0869114759737271	0.0434557379868636	35.67344346948
Arsenite	7	6	E5	4	-0.0482506392558046	0.0487558871045938	0.0243779435522969	42.7578272280668
Arsenite	7	7	E5	4	0.0166302803607536	0.030060844577325	0.0150304222886625	49.6263066268676
Arsenite	7	8	E5	4	-0.0112249710665041	0.0604746683903442	0.0302373341951721	56.7052313272793
Arsenite	7	9	E5	4	-0.0591338869296335	0.0972003361528647	0.0486001680764324	63.4215697508733
Arsenite	7	10	E5	4	0.029152481685064	0.036542179897212	0.018271089948606	70.375616975187
Arsenite	7	11	E5	4	0.0557590179446537	0.042504800180556	0.021252400090278	76.8513674687987
Arsenite	7	1	E6	4	-0.0820477046731506	0.0277272851783898	0.0138636425891949	7.19891654271874
Arsenite	7	2	E6	4	-0.115156524913935	0.0585070985342797	0.0292535492671399	14.6217278705806
Arsenite	7	3	E6	4	-0.112615304409948	0.0549245969594114	0.0274622984797057	21.8072573377022
Arsenite	7	4	E6	4	0.0194461134083238	0.0530052977000913	0.0265026488500457	28.7242226786988
Arsenite	7	5	E6	4	-0.026661236912219	0.0489667431255546	0.0244833715627773	35.6632583212943
Arsenite	7	6	E6	4	-0.0101325147756092	0.0724778107116008	0.0362389053558004	42.8442248223742
Arsenite	7	7	E6	4	0.038954138733649	0.0470737556034135	0.0235368778017068	49.7060322583759
Arsenite	7	8	E6	4	-0.0820386458432068	0.0547360438751449	0.0273680219375725	57.1932839738501
Arsenite	7	9	E6	4	0.00827354688790966	0.0457554014841028	0.0228777007420514	63.8438399050185
Arsenite	7	10	E6	4	0.0678431397173962	0.070343999384199	0.0351719996920995	70.7882790016171
Arsenite	7	11	E6	4	0.0297865970626667	0.108741165977475	0.0543705829887374	77.4570436313917
Arsenite	7	1	E7	4	-0.131475076324278	0.010754949064245	0.0053774745321225	7.82561695949446
Arsenite	7	2	E7	4	-0.206395869593613	0.0823749121489684	0.0411874560744842	15.6900826926546
Arsenite	7	3	E7	4	-0.0675491618126413	0.0550785574068341	0.0275392787034171	22.8294780563647
Arsenite	7	4	E7	4	-0.0927974376236039	0.0471395990723295	0.0235697995361647	30.2104580976479
Arsenite	7	5	E7	4	-0.0564455468094203	0.0464733898699135	0.0232366949349568	37.4628010618859
Arsenite	7	6	E7	4	-0.0399453030633626	0.0734762933026048	0.0367381466513024	44.8533473481297
Arsenite	7	7	E7	4	0.0208896388834532	0.0614317240628379	0.0307158620314189	52.0000258637931
Arsenite	7	8	E7	4	-0.142682488169284	0.0401365104099654	0.0200682552049827	59.7745542553254
Arsenite	7	9	E7	4	-0.0349171808705103	0.0502831976976948	0.0251415988488474	67.3465964264725
Arsenite	7	10	E7	4	-0.0562306918097583	0.0522593526421442	0.0261296763210721	74.7474661557334
Arsenite	7	11	E7	4	0.0056092153965111	0.0818065032061267	0.0409032516030633	81.9263718044759
Arsenite	7	1	E8	4	-0.174031817970378	0.0688848989636874	0.0344424494818437	7.71539999607777
Arsenite	7	2	E8	4	-0.136048144181098	0.115797665234037	0.0578988326170185	15.0726475067451
Arsenite	7	3	E8	4	-0.0334482645897624	0.0785489261231424	0.0392744630615712	22.1022842088695
Arsenite	7	4	E8	4	-0.104425883476434	0.0401302148522789	0.0200651074261395	29.2744969371688
Arsenite	7	5	E8	4	-0.103339900333483	0.0763173705685882	0.0381586852842941	36.4327484167386
Arsenite	7	6	E8	4	-0.174468352990419	0.0317745463764395	0.0158872731882198	44.1211131671939
Arsenite	7	7	E8	4	-0.125332569662344	0.0361256329594697	0.0180628164797348	51.3651215763379
Arsenite	7	8	E8	4	-0.119253581691849	0.0521414388322168	0.0260707194161084	58.7036667365949
Arsenite	7	9	E8	4	0.0293821587823207	0.0763941945440549	0.0381970972720274	65.3651563335272
Arsenite	7	10	E8	4	-0.058544761607465	0.0622229526264878	0.0311114763132439	72.2903193089861
Arsenite	7	11	E8	4	-0.0703409887447862	0.0586829875190627	0.0293414937595314	79.255547606129
Arsenite	7	1	E9	4	-0.220462738952843	0.185168776483123	0.0925843882415616	7.03765477332771
Arsenite	7	2	E9	4	-0.156656664653344	0.154323308990028	0.0771616544950139	14.0280650037175
Arsenite	7	3	E9	4	-0.0981684389765749	0.113550882539369	0.0567754412696846	20.6004488286617
Arsenite	7	4	E9	4	-0.127648852532048	0.182444161556641	0.0912220807783205	27.2920332395846
Arsenite	7	5	E9	4	-0.157573000097757	0.140643572091435	0.0703217860457176	34.055900396073
Arsenite	7	6	E9	4	-0.22585858997703	0.190596336417352	0.095298168208676	41.2134761970483
Arsenite	7	7	E9	4	-0.0651341205340097	0.110273887836664	0.0551369439183318	47.9561812645226
Arsenite	7	8	E9	4	-0.206636736283153	0.137541039476205	0.0687705197381027	55.1342088566765
Arsenite	7	9	E9	4	-0.169422273884749	0.157540581385996	0.078770290692998	62.0145420010404
Arsenite	7	10	E9	4	-0.132235167532696	0.143319538116321	0.0716597690581606	68.9451547627833
Arsenite	7	11	E9	4	-0.126603626717085	0.126471777521763	0.0632358887608816	75.6572966071095
Arsenite	7	1	F1	4	-0.281314651565062	0.208891520751136	0.104445760375568	8.59550231951327
Arsenite	7	2	F1	4	-0.143439143278321	0.048392424278753	0.0241962121393765	16.4539595314788
Arsenite	7	3	F1	4	-0.156010326758189	0.0408301880729102	0.0204150940364551	23.9397009353564
Arsenite	7	4	F1	4	-0.13305170757668	0.0269887248154512	0.0134943624077256	31.3200248550015
Arsenite	7	5	F1	4	-0.130709658101994	0.0573813613874551	0.0286906806937276	38.5510060533972
Arsenite	7	6	F1	4	-0.0922555889886257	0.0704909153012245	0.0352454576506122	45.8550250759063
Arsenite	7	7	F1	4	-0.0602157050575271	0.0615471465490791	0.0307735732745395	53.3705095850036
Arsenite	7	8	F1	4	-0.145237648024281	0.0765309180114786	0.0382654590057393	60.9277373016412
Arsenite	7	9	F1	4	-0.0900554165968097	0.0950825014345625	0.0475412507172812	68.276097612679
Arsenite	7	10	F1	4	-0.123839864998794	0.108764919274384	0.0543824596371922	75.8087977506241
Arsenite	7	11	F1	4	-0.12136668098218	0.048784663474208	0.024392331737104	83.5880266257815
Arsenite	7	1	F10	4	-0.190177271618721	0.0617292219932967	0.0308646109966483	7.73221968363031
Arsenite	7	2	F10	4	-0.158342154001972	0.0636967050921575	0.0318483525460787	15.1501475482285
Arsenite	7	3	F10	4	-0.0812747518850334	0.00887547670390276	0.00443773835195138	21.9986725488001
Arsenite	7	4	F10	4	-0.0294037209806348	0.0465162554130578	0.0232581277065289	28.6443064463012
Arsenite	7	5	F10	4	-0.0841778643809724	0.0244684636166911	0.0122342318083455	35.7667327623725
Arsenite	7	6	F10	4	-0.194286309714754	0.0569643959285458	0.0284821979642729	43.3673907741899
Arsenite	7	7	F10	4	-0.103662737161117	0.0915738776923515	0.0457869388461757	50.3883395193387
Arsenite	7	8	F10	4	-0.11962627409516	0.0433438673814579	0.021671933690729	56.922640400947
Arsenite	7	9	F10	4	-0.00353626687634295	0.0625339292762333	0.0312669646381167	63.693797968603
Arsenite	7	10	F10	4	-0.0306648947009331	0.0255980264176328	0.0127990132088164	70.5375108307191
Arsenite	7	11	F10	4	0.0781496693100279	0.0866418708322173	0.0433209354161087	76.8165608233844
Arsenite	7	1	F11	4	0.0405798082509793	0.0287111656347169	0.0143555828173585	7.11578028184938
Arsenite	7	2	F11	4	-0.0792972053867657	0.0739285179087063	0.0369642589543532	14.4094038532345
Arsenite	7	3	F11	4	-0.00113866253634692	0.0630549029205855	0.0315274514602928	21.3584886778742
Arsenite	7	4	F11	4	-0.063698267761134	0.122446595218155	0.0612232976090773	28.9152593009378
Arsenite	7	5	F11	4	-0.103611777853662	0.0470421300193279	0.0235210650096639	36.73685517125
Arsenite	7	6	F11	4	-0.0784551863702385	0.0747313355214147	0.0373656677607074	44.2456493167432
Arsenite	7	7	F11	4	0.0229257189934419	0.0810443789040889	0.0405221894520445	51.3344456704722
Arsenite	7	8	F11	4	-0.0312427464993101	0.112960125923115	0.0564800629615575	58.6557322356743
Arsenite	7	9	F11	4	-0.130654406567042	0.0154267548006875	0.00771337740034373	66.3154457536096
Arsenite	7	10	F11	4	0.00218886167653271	0.0293912627633165	0.0146956313816583	73.6607940191193
Arsenite	7	11	F11	4	-0.000267779029817783	0.0957252796519514	0.0478626398259757	81.0058896323691
Arsenite	7	1	F12	4	-0.263984128426215	0.0653181777883813	0.0326590888941907	8.75008246038277
Arsenite	7	2	F12	4	-0.194072084777237	0.0753404753397655	0.0376702376698827	16.3720071011886
Arsenite	7	3	F12	4	-0.187921016545302	0.0552213138183455	0.0276106569091728	23.8376036984805
Arsenite	7	4	F12	4	-0.0511155827768602	0.0930714006480532	0.0465357003240266	31.4418635490595
Arsenite	7	5	F12	4	-0.148356762011065	0.103670809351032	0.0518354046755161	39.6019723870192
Arsenite	7	6	F12	4	-0.0455794751635131	0.0823801183117617	0.0411900591558809	47.4414260616186
Arsenite	7	7	F12	4	-0.0684088360775607	0.0669522922085979	0.033476146104299	54.8266319060948
Arsenite	7	8	F12	4	-0.133529101721549	0.117277726493894	0.0586388632469471	62.8715587429214
Arsenite	7	9	F12	4	-0.111988895948861	0.0776238327840478	0.0388119163920239	70.5680437230452
Arsenite	7	10	F12	4	-0.0776240218944579	0.112090418890672	0.0560452094453361	78.9721932371097
Arsenite	7	11	F12	4	-0.0659424145562791	0.0458781483590831	0.0229390741795416	86.5314405237533
Arsenite	7	1	F2	4	-0.24543273604321	0.0958811792110922	0.0479405896055461	7.44476325236887
Arsenite	7	2	F2	4	-0.210551674568865	0.07382860231947	0.036914301159735	15.1197581992479
Arsenite	7	3	F2	4	-0.0865300274762897	0.0641421570277977	0.0320710785138989	22.0886436805582
Arsenite	7	4	F2	4	-0.190172833280232	0.0697997595466907	0.0348998797733454	29.4417212588476
Arsenite	7	5	F2	4	-0.139783881412234	0.0090356496983035	0.00451782484915175	36.6012241834842
Arsenite	7	6	F2	4	-0.159419012447386	0.072618915115204	0.036309457557602	43.7790070400076
Arsenite	7	7	F2	4	-0.103460096517029	0.0574779583635567	0.0287389791817784	50.8552538671008
Arsenite	7	8	F2	4	-0.129018354478752	0.0304703767055772	0.0152351883527886	57.6161210658187
Arsenite	7	9	F2	4	-0.0112285267733673	0.0562377709925432	0.0281188854962716	64.026205137463
Arsenite	7	10	F2	4	-0.114456596614423	0.065113813103124	0.032556906551562	70.9125251634001
Arsenite	7	11	F2	4	-0.0306049485524152	0.02692730086052	0.01346365043026	77.6446960782314
Arsenite	7	1	F3	4	-0.272312832650842	0.0791199109660835	0.0395599554830417	8.62858101253008
Arsenite	7	2	F3	4	-0.163378158335749	0.0633155874551945	0.0316577937275973	15.795129232431
Arsenite	7	3	F3	4	-0.178568158524353	0.111269979383233	0.0556349896916167	22.9693064753798
Arsenite	7	4	F3	4	-0.132164191860239	0.0647991777605774	0.0323995888802887	30.25676403614
Arsenite	7	5	F3	4	-0.061528416396293	0.0545419650806242	0.0272709825403121	37.2355043920101
Arsenite	7	6	F3	4	-0.191525522905852	0.0637332785184724	0.0318666392592362	44.629763523869
Arsenite	7	7	F3	4	-0.0851435985726928	0.0393232662342493	0.0196616331171246	51.6828962964653
Arsenite	7	8	F3	4	-0.188189890862772	0.103422440104557	0.0517112200522783	59.2922314833884
Arsenite	7	9	F3	4	-0.110414458683013	0.0350908228579641	0.017545411428982	66.614245183419
Arsenite	7	10	F3	4	-0.158738026018226	0.178813223646561	0.0894066118232806	73.646541077278
Arsenite	7	11	F3	4	-0.156745393662051	0.035885265484132	0.017942632742066	81.0625433430394
Arsenite	7	1	F4	4	-0.142421957534978	0.0984864579584007	0.0492432289792004	7.24957578305976
Arsenite	7	2	F4	4	-0.151171886505779	0.0973405524334464	0.0486702762167232	14.4538195842638
Arsenite	7	3	F4	4	-0.144454302386382	0.0627240020092915	0.0313620010046457	21.9356751023336
Arsenite	7	4	F4	4	-0.163611208860407	0.0915967534318272	0.0457983767159136	29.001194506153
Arsenite	7	5	F4	4	-0.130470801376258	0.0603428430515335	0.0301714215257668	36.14142110129
Arsenite	7	6	F4	4	-0.131136250177386	0.0799088147423616	0.0399544073711808	43.2508018080345
Arsenite	7	7	F4	4	-0.116356545933736	0.117161064038655	0.0585805320193277	50.3210313771213
Arsenite	7	8	F4	4	-0.176997692180487	0.122154161296943	0.0610770806484714	57.4227120192096
Arsenite	7	9	F4	4	-0.0842168137307551	0.0574131374602767	0.0287065687301384	64.3881133677477
Arsenite	7	10	F4	4	-0.0745700369527394	0.0730140036941135	0.0365070018470568	71.113733802069
Arsenite	7	11	F4	4	-0.0757182118488612	0.113064277907506	0.0565321389537532	77.9498391544454
Arsenite	7	1	F5	4	-0.081403496205726	0.0473673348755273	0.0236836674377637	7.25450838105885
Arsenite	7	2	F5	4	-0.083220360975704	0.105021673585083	0.0525108367925415	14.3829771302726
Arsenite	7	3	F5	4	-0.0966074193527227	0.0293015228556902	0.0146507614278451	21.4917759570158
Arsenite	7	4	F5	4	-0.154653783287004	0.0832148052037063	0.0416074026018532	28.8260900104821
Arsenite	7	5	F5	4	-0.0620546598259594	0.0683241861963028	0.0341620930981514	35.8176669604678
Arsenite	7	6	F5	4	0.010588897655737	0.0507926747660982	0.0253963373830491	42.7542194324077
Arsenite	7	7	F5	4	-0.111519985266381	0.0466839677286999	0.0233419838643499	49.7344764156144
Arsenite	7	8	F5	4	-0.141707442048431	0.0406817769850151	0.0203408884925076	57.090984247557
Arsenite	7	9	F5	4	-0.123162548006468	0.0532031017700514	0.0266015508850257	64.3266345163998
Arsenite	7	10	F5	4	-0.0478008868553738	0.0185005763667538	0.00925028818337692	71.2641717150852
Arsenite	7	11	F5	4	0.00552722663984473	0.0205849339476793	0.0102924669738396	78.1010118659069
Arsenite	7	1	F6	4	-0.167617571420761	0.0935471559119774	0.0467735779559887	6.99014138389897
Arsenite	7	2	F6	4	-0.163536492871667	0.107194866283329	0.0535974331416647	13.8650221030122
Arsenite	7	3	F6	4	-0.188739711829279	0.0718779695795936	0.0359389847897968	20.9615040082977
Arsenite	7	4	F6	4	-0.133872434861468	0.069605882107477	0.0348029410537385	27.807838410186
Arsenite	7	5	F6	4	-0.0859312045040047	0.0582388510505537	0.0291194255252768	34.5906711902555
Arsenite	7	6	F6	4	-0.155931561518322	0.0373456069364252	0.0186728034682126	41.4550076651549
Arsenite	7	7	F6	4	-0.0837029649628905	0.0646742721656698	0.0323371360828349	48.4104536869452
Arsenite	7	8	F6	4	-0.21035699978694	0.107751904797738	0.053875952398869	55.7177139199368
Arsenite	7	9	F6	4	-0.190809390433569	0.099173261000347	0.0495866305001735	62.8307871766428
Arsenite	7	10	F6	4	-0.0980403930401854	0.064689590119388	0.032344795059694	69.7729504006629
Arsenite	7	11	F6	4	-0.172018687277552	0.088116590575383	0.0440582952876915	76.8404882433111
Arsenite	7	1	F7	4	-0.0765893753988947	0.0703671654143197	0.0351835827071599	7.3164298808016
Arsenite	7	2	F7	4	-0.110248393744633	0.0213184207414151	0.0106592103707075	14.2777863718257
Arsenite	7	3	F7	4	-0.0894417384757646	0.0728763349187219	0.036438167459361	21.2294349259928
Arsenite	7	4	F7	4	-0.0594423762769314	0.0417975082821585	0.0208987541410792	28.2637825646108
Arsenite	7	5	F7	4	-0.124638162252322	0.0469088105261511	0.0234544052630755	36.1926279840852
Arsenite	7	6	F7	4	-0.066732628324114	0.0749552815946067	0.0374776407973033	43.3308498039764
Arsenite	7	7	F7	4	-0.104931998859186	0.0483384830939783	0.0241692415469891	50.4642273107158
Arsenite	7	8	F7	4	-0.0743164152335613	0.0513525410140486	0.0256762705070243	58.0753005048865
Arsenite	7	9	F7	4	-0.0403874605470401	0.066577921999661	0.0332889609998305	65.2934896368178
Arsenite	7	10	F7	4	-0.0339481420873921	0.0614413912521002	0.0307206956260501	72.6475124609276
Arsenite	7	11	F7	4	-0.0950733981415969	0.0687286368556771	0.0343643184278385	80.0549043709118
Arsenite	7	1	F8	4	-0.208013902720281	0.0596742927133308	0.0298371463566654	7.47225195940005
Arsenite	7	2	F8	4	-0.227927293080539	0.03060986758532	0.01530493379266	15.4160911854021
Arsenite	7	3	F8	4	-0.115344011216095	0.106792858281697	0.0533964291408486	22.4378217994495
Arsenite	7	4	F8	4	-0.125486525985858	0.0506422280339174	0.0253211140169587	29.432640313019
Arsenite	7	5	F8	4	-0.126741206250068	0.111162500343381	0.0555812501716905	36.2781921200557
Arsenite	7	6	F8	4	-0.241660526344671	0.10322411569263	0.051612057846315	43.5547960432418
Arsenite	7	7	F8	4	-0.0845886108014608	0.0516017798884805	0.0258008899442402	50.6321448776217
Arsenite	7	8	F8	4	-0.314665294538435	0.104641074368486	0.0523205371842429	58.2164972670694
Arsenite	7	9	F8	4	-0.220984177036832	0.0657646653433392	0.0328823326716696	65.608011181036
Arsenite	7	10	F8	4	-0.180263682973811	0.0376247513786683	0.0188123756893341	72.6770339449058
Arsenite	7	11	F8	4	-0.164771664083783	0.0870479676859303	0.0435239838429651	79.6051744352339
Arsenite	7	1	F9	4	-0.173948489419197	0.0563358590865089	0.0281679295432544	7.44491339094369
Arsenite	7	2	F9	4	-0.0994894951653559	0.106618909901798	0.0533094549508989	14.6134750217166
Arsenite	7	3	F9	4	-0.105274845819402	0.0654603238555997	0.0327301619277999	21.4497557873934
Arsenite	7	4	F9	4	-0.0606755176286695	0.0638606671454992	0.0319303335727496	28.313023996732
Arsenite	7	5	F9	4	-0.146357853380007	0.0168822955531823	0.00844114777659113	35.3953126106879
Arsenite	7	6	F9	4	-0.128740020447554	0.058645405962123	0.0293227029810615	42.8478621976444
Arsenite	7	7	F9	4	-0.0463474210743204	0.066699295410024	0.033349647705012	49.7892750276315
Arsenite	7	8	F9	4	-0.170498843783324	0.100852271972371	0.0504261359861853	57.2123671841975
Arsenite	7	9	F9	4	-0.13121735264614	0.0708882786699634	0.0354441393349817	64.2871976312884
Arsenite	7	10	F9	4	-0.11036113232956	0.0316141699798557	0.0158070849899279	71.302740901173
Arsenite	7	11	F9	4	-0.013607618001779	0.0204227179464483	0.0102113589732242	78.0771727142481
Arsenite	7	1	G1	4	-0.263938986162628	0.115282890543366	0.0576414452716831	7.34450473069419
Arsenite	7	2	G1	4	-0.0133419647239101	0.131736787856535	0.0658683939282673	14.3247926666594
Arsenite	7	3	G1	4	0.00104056427401084	0.0567626656711877	0.0283813328355938	21.2737084436526
Arsenite	7	4	G1	4	-0.0874596905514926	0.0439146062748443	0.0219573031374222	28.2115047098623
Arsenite	7	5	G1	4	-0.115254110769842	0.0301894344698372	0.0150947172349186	35.171490632931
Arsenite	7	6	G1	4	-0.100532755521563	0.0849253426272887	0.0424626713136443	42.08585346053
Arsenite	7	7	G1	4	-0.00193190635083174	0.12195121452352	0.0609756072617598	49.0904392111018
Arsenite	7	8	G1	4	-0.117676368567965	0.0934595969025949	0.0467297984512975	56.1415212420434
Arsenite	7	9	G1	4	-0.111575200061532	0.0888913932481757	0.0444456966240879	63.1410028354883
Arsenite	7	10	G1	4	-0.0660903551660693	0.0619508380884885	0.0309754190442443	69.7948307729944
Arsenite	7	11	G1	4	-0.0610933764800058	0.0904454147830029	0.0452227073915014	76.6422197256966
Arsenite	7	1	G10	4	-0.276616623240099	0.06652135410826	0.03326067705413	7.68798123909619
Arsenite	7	2	G10	4	-0.209649506816563	0.0532181987560087	0.0266090993780043	15.2489424596277
Arsenite	7	3	G10	4	-0.162098826333711	0.0683083559602636	0.0341541779801318	22.0768739679914
Arsenite	7	4	G10	4	-0.0476347035441693	0.062660920034286	0.031330460017143	28.740733216912
Arsenite	7	5	G10	4	-0.0915117730959057	0.0496007752029892	0.0248003876014946	35.6590369472532
Arsenite	7	6	G10	4	-0.0578192175714496	0.065389841030976	0.032694920515488	42.6859957981566
Arsenite	7	7	G10	4	0.016263985666659	0.0695762583560232	0.0347881291780116	49.0478123858704
Arsenite	7	8	G10	4	-0.0650307388626254	0.0791219411245198	0.0395609705622599	56.1798258951534
Arsenite	7	9	G10	4	-0.00532878101463813	0.100591923284158	0.0502959616420789	62.5892200445495
Arsenite	7	10	G10	4	0.094651150431026	0.126576974607423	0.0632884873037115	68.8177061040679
Arsenite	7	11	G10	4	0.0266422320380724	0.0820703878460731	0.0410351939230365	75.0552447530792
Arsenite	7	1	G11	4	-0.224653720687556	0.116065607295021	0.0580328036475107	7.29161843433253
Arsenite	7	2	G11	4	-0.227792908477227	0.100800064214004	0.0504000321070018	14.7817521356048
Arsenite	7	3	G11	4	-0.171528193442056	0.122845305591585	0.0614226527957925	21.5975073630198
Arsenite	7	4	G11	4	-0.144780929393651	0.0726319923777835	0.0363159961888918	28.5914228317696
Arsenite	7	5	G11	4	-0.194845933186431	0.0984247513602178	0.0492123756801089	36.1662401590067
Arsenite	7	6	G11	4	-0.258491169842692	0.112582088726588	0.0562910443632938	44.0863169789884
Arsenite	7	7	G11	4	-0.115726596962154	0.0684105624476281	0.0342052812238141	51.1651474873247
Arsenite	7	8	G11	4	-0.167196520883624	0.0761072325271515	0.0380536162635757	58.6103697532937
Arsenite	7	9	G11	4	-0.102178804350701	0.118086400661417	0.0590432003307085	65.814488804256
Arsenite	7	10	G11	4	-0.120481636293128	0.0840794935942223	0.0420397467971112	73.1621332188108
Arsenite	7	11	G11	4	-0.262327185712483	0.0894773884075914	0.0447386942037957	80.638762886021
Arsenite	7	1	G12	4	-0.198123021855479	0.240938914696626	0.120469457348313	7.60571130511834
Arsenite	7	2	G12	4	-0.200806547910745	0.192734685111244	0.0963673425556219	14.8619174813891
Arsenite	7	3	G12	4	-0.0624355234264353	0.115120622255183	0.0575603111275916	21.9156885141795
Arsenite	7	4	G12	4	-0.165835982993182	0.261942403564042	0.130971201782021	29.331783901167
Arsenite	7	5	G12	4	-0.064445029101908	0.133019913909027	0.0665099569545137	37.0546153325502
Arsenite	7	6	G12	4	-0.168133743040329	0.216673834306343	0.108336917153172	44.5602067589481
Arsenite	7	7	G12	4	-0.146570753923564	0.170921517346081	0.0854607586730406	51.8475078811471
Arsenite	7	8	G12	4	-0.11852080829595	0.204539204847696	0.102269602423848	59.3625838787171
Arsenite	7	9	G12	4	-0.0629570980378493	0.200438088845068	0.100219044422534	66.7509475861703
Arsenite	7	10	G12	4	-0.11260694244724	0.149949530626426	0.0749747653132129	74.5283548015247
Arsenite	7	11	G12	4	-0.19854639247649	0.176627901906055	0.0883139509530275	82.1438279009132
Arsenite	7	1	G2	4	-0.2984660322309	0.0172566929323175	0.00862834646615873	8.10751370705098
Arsenite	7	2	G2	4	-0.202542752616002	0.0315927834822507	0.0157963917411253	15.6056897862997
Arsenite	7	3	G2	4	-0.162701476976069	0.0615423421854072	0.0307711710927036	23.0193656304126
Arsenite	7	4	G2	4	-0.131179430089625	0.0442523625071248	0.0221261812535624	30.207591523413
Arsenite	7	5	G2	4	-0.133209264412025	0.0616880013209268	0.0308440006604634	37.5135948109287
Arsenite	7	6	G2	4	-0.127190978619953	0.0168948601114145	0.00844743005570727	44.8008770215246
Arsenite	7	7	G2	4	-0.0393830592984051	0.05085518051942	0.02542759025971	51.7596664852791
Arsenite	7	8	G2	4	-0.161194343695677	0.0499876905519661	0.0249938452759831	59.1163394377779
Arsenite	7	9	G2	4	-0.0908247440535893	0.10799516901056	0.05399758450528	65.9508165380069
Arsenite	7	10	G2	4	-0.0626039157794857	0.0583799575664565	0.0291899787832282	72.4921916631702
Arsenite	7	11	G2	4	-0.0269393973060819	0.019527547473192	0.00976377373659601	79.2798067566437
Arsenite	7	1	G3	4	-0.181320046115405	0.075986977552703	0.0379934887763515	7.93553104400151
Arsenite	7	2	G3	4	-0.274416534744562	0.0659528157167577	0.0329764078583789	15.8758738016105
Arsenite	7	3	G3	4	-0.155911185259001	0.0235077321094941	0.011753866054747	23.7036442109513
Arsenite	7	4	G3	4	-0.194854177594027	0.0849924843259276	0.0424962421629638	31.479010849321
Arsenite	7	5	G3	4	-0.169660314802142	0.0528661877891275	0.0264330938945638	39.2894142013655
Arsenite	7	6	G3	4	-0.193728703636004	0.067996065652561	0.0339980328262805	47.5051447043883
Arsenite	7	7	G3	4	-0.116184495939857	0.0822798593944278	0.0411399296972139	54.923640804578
Arsenite	7	8	G3	4	-0.213291859077836	0.0322504107925336	0.0161252053962668	63.0209817566432
Arsenite	7	9	G3	4	-0.0838933957192222	0.121589294200148	0.060794647100074	70.8469867508171
Arsenite	7	10	G3	3	-0.236458952910696	0.0821546166018796	0.0474319900102657	79.0613066552464
Arsenite	7	11	G3	4	-0.148842574148469	0.24444948033059	0.122224740165295	86.80997870662
Arsenite	7	1	G4	3	-0.174799012387619	0.0421979596955681	0.0243630033894892	7.61695863869913
Arsenite	7	2	G4	4	-0.170922039977689	0.0431873834539657	0.0215936917269828	15.197789744385
Arsenite	7	3	G4	4	-0.156344169193352	0.0365098017711121	0.018254900885556	22.8686696079772
Arsenite	7	4	G4	4	-0.089824968050975	0.0694195909411947	0.0347097954705974	30.2378793353767
Arsenite	7	5	G4	4	-0.0538277963421959	0.0648468111839973	0.0324234055919986	37.3929429234876
Arsenite	7	6	G4	4	-0.0774790211466974	0.0315361622009927	0.0157680811004964	44.6568199300856
Arsenite	7	7	G4	4	-0.0384506061009392	0.0641905165585088	0.0320952582792544	51.9667237313798
Arsenite	7	8	G4	4	-0.192781897388275	0.0334810215869715	0.0167405107934857	59.5518384759822
Arsenite	7	9	G4	4	-0.136140751954277	0.100147135344641	0.0500735676723205	67.2570739136806
Arsenite	7	10	G4	4	-0.10639001181601	0.0105151332567983	0.00525756662839916	74.624394789639
Arsenite	7	11	G4	4	-0.00510630898761566	0.0493644863219821	0.0246822431609911	81.9315428061918
Arsenite	7	1	G5	4	-0.193156230713256	0.102478850131833	0.0512394250659166	7.49765122937072
Arsenite	7	2	G5	4	-0.187254905741929	0.073550676772065	0.0367753383860325	14.6001267713928
Arsenite	7	3	G5	4	-0.193036244852944	0.0769869978388834	0.0384934989194417	21.9205414747497
Arsenite	7	4	G5	4	-0.15177424042046	0.0280261512566816	0.0140130756283408	29.1977836633465
Arsenite	7	5	G5	4	-0.097406894807081	0.0772292053796457	0.0386146026898229	36.3958179580527
Arsenite	7	6	G5	4	-0.109094864149438	0.0760704574241683	0.0380352287120842	43.6202500623434
Arsenite	7	7	G5	4	-0.137629210043643	0.030409103323522	0.015204551661761	50.8860214991161
Arsenite	7	8	G5	4	-0.131632146317671	0.0207367744219077	0.0103683872109538	58.2922041005523
Arsenite	7	9	G5	4	-0.135842091174382	0.0977066182946346	0.0488533091473173	65.8384289570442
Arsenite	7	10	G5	4	-0.0430624843399983	0.0404854282107819	0.0202427141053909	72.8818665684421
Arsenite	7	11	G5	4	0.0424703682959257	0.0428820310386521	0.021441015519326	79.6601090927226
Arsenite	7	1	G6	4	-0.134748987139013	0.0352964441025988	0.0176482220512994	7.30567063379126
Arsenite	7	2	G6	4	-0.154041643869996	0.0501325225107482	0.0250662612553741	14.8003141840443
Arsenite	7	3	G6	4	-0.0277035039420928	0.0353884179945292	0.0176942089972646	21.6210742932127
Arsenite	7	4	G6	4	-0.161721945943284	0.126427395804844	0.0632136979024219	28.5971263497099
Arsenite	7	5	G6	4	-0.114328727267416	0.0207722053446752	0.0103861026723376	35.6957029705285
Arsenite	7	6	G6	4	-0.157115465452949	0.103932548055579	0.0519662740277893	42.6666043761861
Arsenite	7	7	G6	4	-0.0861636959495654	0.0606828506577785	0.0303414253288893	49.5598446499722
Arsenite	7	8	G6	4	-0.167113666963212	0.149040031774559	0.0745200158872796	56.6002254373023
Arsenite	7	9	G6	4	-0.0359336123853282	0.0492759347044624	0.0246379673522312	63.3741966468369
Arsenite	7	10	G6	4	-0.079914103433872	0.10049618826474	0.05024809413237	70.2762560356929
Arsenite	7	11	G6	4	-0.0745080266117631	0.0377911992930663	0.0188955996465332	76.9084186707725
Arsenite	7	1	G7	4	-0.191042332587896	0.0810373230173023	0.0405186615086512	7.49078220380164
Arsenite	7	2	G7	4	-0.139267370242211	0.107158465061444	0.0535792325307221	14.4893354070883
Arsenite	7	3	G7	4	-0.165328814791706	0.0773692895622024	0.0386846447811012	21.6991032311412
Arsenite	7	4	G7	4	-0.096011869817947	0.0448633366386691	0.0224316683193346	28.9952871071948
Arsenite	7	5	G7	4	-0.193685319003167	0.101565935859491	0.0507829679297455	36.6232776689573
Arsenite	7	6	G7	4	-0.0815404451084404	0.124106232921396	0.0620531164606979	43.8319213738967
Arsenite	7	7	G7	4	-0.0941828840847025	0.041875654474767	0.0209378272373835	50.9460635933371
Arsenite	7	8	G7	4	-0.0816020030785193	0.0218928421033353	0.0109464210516677	58.3106920370656
Arsenite	7	9	G7	4	-0.28430940637771	0.154840072006707	0.0774200360033534	66.9700293841575
Arsenite	7	10	G7	4	0.0825368337420261	0.113607208054897	0.0568036040274484	73.6717186884566
Arsenite	7	11	G7	4	-0.0101059957485862	0.0668963615434784	0.0334481807717392	80.6784299085782
Arsenite	7	1	G8	4	-0.12251614036508	0.0793319900008195	0.0396659950004097	7.11696965370246
Arsenite	7	2	G8	4	-0.095961897448126	0.0845801435796368	0.0422900717898184	14.4241729770771
Arsenite	7	3	G8	4	-0.138639724094047	0.0831870916755697	0.0415935458377849	21.5132488934012
Arsenite	7	4	G8	4	0.011034891012061	0.0915480630969224	0.0457740315484612	28.3804420262782
Arsenite	7	5	G8	4	-0.0728704086354915	0.098509346770379	0.0492546733851895	34.9875088388305
Arsenite	7	6	G8	4	-0.0980000872680782	0.0633366761673596	0.0316683380836798	42.4558594782474
Arsenite	7	7	G8	4	0.0811881595255967	0.0551672246881098	0.0275836123440549	49.1812847569856
Arsenite	7	8	G8	4	-0.0851992482508762	0.0447094977937919	0.0223547488968959	56.2799106284103
Arsenite	7	9	G8	4	-0.099478269457196	0.182677940088081	0.0913389700440405	63.3730421358463
Arsenite	7	10	G8	4	0.00181718682174692	0.0781123320291928	0.0390561660145964	70.0808405738368
Arsenite	7	11	G8	4	-0.0175073736964344	0.0431641218149268	0.0215820609074634	77.2200420436118
Arsenite	7	1	G9	4	-0.0499699197239831	0.0665807151163183	0.0332903575581591	6.48499336167229
Arsenite	7	2	G9	4	-0.173269777087674	0.152646933069646	0.0763234665348232	13.5505631057386
Arsenite	7	3	G9	4	-0.0841555046284749	0.121414771562909	0.0607073857814543	20.1376027722361
Arsenite	7	4	G9	4	-0.0389427841978011	0.119016052209017	0.0595080261045083	26.5617948422913
Arsenite	7	5	G9	3	-0.019387160452664	0.0306634750371667	0.0177035655669976	33.0967935776679
Arsenite	7	6	G9	4	-0.14560548188414	0.117958456736736	0.0589792283683679	39.9312675830292
Arsenite	7	7	G9	4	-0.0461949341078604	0.12363376206518	0.0618168810325898	46.4344360819039
Arsenite	7	8	G9	4	-0.0315795998622906	0.0748070152093451	0.0374035076046726	52.8730213453203
Arsenite	7	9	G9	4	0.0391478560506807	0.074263324767538	0.037131662383769	59.1667504238822
Arsenite	7	10	G9	4	0.047649957868232	0.0962039440111338	0.0481019720055669	65.4235768447738
Arsenite	7	11	G9	4	-0.00596587181460667	0.0785784908815525	0.0392892454407762	71.6733712206067
Arsenite	7	1	H1	4	-0.347394197892132	0.0669416421433678	0.0334708210716839	7.72629008370386
Arsenite	7	2	H1	4	-0.228203750269718	0.0662652400406129	0.0331326200203064	15.1416344624091
Arsenite	7	3	H1	4	0.30652007390725	0.130839400721395	0.0654197003606973	21.3213827867615
Arsenite	7	4	H1	4	-0.0843410183988079	0.105578404178857	0.0527892020894283	28.1116297088654
Arsenite	7	5	H1	4	-0.104730880221623	0.0670681043720116	0.0335340521860058	35.1059460016636
Arsenite	7	6	H1	4	-0.160022867984081	0.090019339745425	0.0450096698727125	42.1913992058808
Arsenite	7	7	H1	4	-0.0958683465871209	0.15283357719268	0.0764167885963398	49.036837747237
Arsenite	7	8	H1	4	-0.15407002086867	0.0462446344693803	0.0231223172346901	56.0187269335184
Arsenite	7	9	H1	4	-0.148140424778034	0.0850207025276997	0.0425103512638498	63.4315064019032
Arsenite	7	10	H1	4	-0.138648373595036	0.0788152255753264	0.0394076127876632	70.4549398939672
Arsenite	7	11	H1	4	-0.111127792465907	0.139497819399559	0.0697489096997794	77.4117894185767
Arsenite	7	1	H10	4	-0.167890351161235	0.159518720661542	0.0797593603307708	7.01353152443763
Arsenite	7	2	H10	4	-0.238846561540951	0.0675723815416367	0.0337861907708183	14.2079210109765
Arsenite	7	3	H10	4	-0.137723077107087	0.138828955798703	0.0694144778993517	21.4054794202945
Arsenite	7	4	H10	4	-0.307244599699306	0.0375107725496552	0.0187553862748276	28.3396039859555
Arsenite	7	5	H10	4	-0.156542145770024	0.130740045486885	0.0653700227434425	35.250864173379
Arsenite	7	6	H10	4	-0.221534445963764	0.117035586688814	0.0585177933444069	42.1160019874549
Arsenite	7	7	H10	4	-0.325317338765926	0.0470445147475515	0.0235222573737757	49.137786908377
Arsenite	7	8	H10	4	-0.364684351557958	0.080010387840979	0.0400051939204895	56.4392176371361
Arsenite	7	9	H10	4	-0.0420513859819789	0.0944958023049585	0.0472479011524793	63.1624744996492
Arsenite	7	10	H10	4	-0.146490264218171	0.0861191612002053	0.0430595806001027	69.7741785010715
Arsenite	7	11	H10	4	-0.146193074624475	0.110714641786239	0.0553573208931193	76.4741295833782
Arsenite	7	1	H11	4	-0.283385839330895	0.0717112750009725	0.0358556375004862	7.67866200414684
Arsenite	7	2	H11	4	-0.380815557051524	0.118668220728317	0.0593341103641587	15.1469188501628
Arsenite	7	3	H11	4	-0.11365302906029	0.135062555761033	0.0675312778805164	22.2949199324721
Arsenite	7	4	H11	4	-0.258526917783484	0.109097309146419	0.0545486545732093	29.3039334181117
Arsenite	7	5	H11	4	-0.208201850286456	0.079737730099687	0.0398688650498435	36.7008188143519
Arsenite	7	6	H11	4	-0.18957431026452	0.0972136303985294	0.0486068151992647	43.776179801318
Arsenite	7	7	H11	4	-0.254991345895964	0.144190700409213	0.0720953502046063	50.7728287224609
Arsenite	7	8	H11	4	-0.17334264611778	0.101056686552634	0.0505283432763168	57.9419609739974
Arsenite	7	9	H11	4	-0.134513595641742	0.0961274786471615	0.0480637393235808	65.2301618547574
Arsenite	7	10	H11	4	-0.236382764676313	0.106206306929461	0.0531031534647303	72.5660460047945
Arsenite	7	11	H11	4	-0.215538160546195	0.102613041768567	0.0513065208842836	79.8554594423928
Arsenite	7	1	H12	4	-0.175762680449242	0.0913619473137148	0.0456809736568574	7.64817246163252
Arsenite	7	2	H12	4	-0.302536937631967	0.0679192140132361	0.0339596070066181	16.0372026584954
Arsenite	7	3	H12	4	-0.133988430703591	0.112633741715424	0.0563168708577122	23.5676570399102
Arsenite	7	4	H12	4	-0.272056082572358	0.114176404801608	0.0570882024008038	31.4365626472141
Arsenite	7	5	H12	4	-0.237859287144424	0.135832040010651	0.0679160200053253	39.765879484499
Arsenite	7	6	H12	4	-0.295970109507497	0.0902667160143232	0.0451333580071616	47.8340949462965
Arsenite	7	7	H12	4	-0.205431211042831	0.0816034573818892	0.0408017286909446	55.4282560159271
Arsenite	7	8	H12	4	-0.235295531947925	0.0638355881671221	0.0319177940835611	63.2457692097357
Arsenite	7	9	H12	4	-0.181913179394582	0.237990807385919	0.11899540369296	71.8031667268972
Arsenite	7	10	H12	4	-0.159149546304243	0.121581848764907	0.0607909243824537	79.8472436357888
Arsenite	7	11	H12	4	-0.169905503551376	0.0429156008603646	0.0214578004301823	87.937497989737
Arsenite	7	1	H2	4	-0.35200055530068	0.0918097060862461	0.0459048530431231	8.4136321865426
Arsenite	7	2	H2	4	-0.34739870985683	0.122438288451376	0.0612191442256879	16.6623912550516
Arsenite	7	3	H2	4	-0.385109670142544	0.0994927897583981	0.0497463948791991	25.1236528317626
Arsenite	7	4	H2	4	-0.271285378453931	0.0561376431787702	0.0280688215893851	32.8772075832729
Arsenite	7	5	H2	4	-0.197041670962254	0.0910177045385998	0.0455088522692999	40.7007020126499
Arsenite	7	6	H2	4	-0.161944131655559	0.0802210153924581	0.040110507696229	48.2850215260782
Arsenite	7	7	H2	4	-0.0862289361296257	0.0452906570944898	0.0226453285472449	55.3093875720755
Arsenite	7	8	H2	4	-0.262958893677982	0.0831591264421636	0.0415795632210818	63.2884003739123
Arsenite	7	9	H2	4	-0.298719104401874	0.144858337192441	0.0724291685962203	71.7604611849984
Arsenite	7	10	H2	4	-0.00215004122681817	0.0408642748462791	0.0204321374231395	79.2500809491967
Arsenite	7	11	H2	4	-0.232080810716101	0.0930350150327027	0.0465175075163514	87.1504579445374
Arsenite	7	1	H3	4	-0.344947457510655	0.319377797756125	0.159688898878063	8.13700438857081
Arsenite	7	2	H3	4	-0.210328120630797	0.0879354124450637	0.0439677062225319	15.4703209428789
Arsenite	7	3	H3	4	-0.307396787786474	0.105175735506212	0.052587867753106	23.7817139601695
Arsenite	7	4	H3	4	-0.114243721109397	0.042038783946553	0.0210193919732765	30.9995616975672
Arsenite	7	5	H3	4	-0.100387477908497	0.0895714096625186	0.0447857048312593	38.1589738555685
Arsenite	7	6	H3	4	-0.128360217074103	0.0500030010364985	0.0250015005182492	45.2937726131461
Arsenite	7	7	H3	4	-0.173696687824657	0.110869239264213	0.0554346196321067	52.5557771839753
Arsenite	7	8	H3	4	-0.154951527903931	0.0496601302059947	0.0248300651029974	60.1576464335768
Arsenite	7	9	H3	4	-0.187353442163629	0.107992772147134	0.0539963860735668	68.0455037894738
Arsenite	7	10	H3	4	-0.128031323005553	0.0310407287455704	0.0155203643727852	75.2658354958055
Arsenite	7	11	H3	4	-0.156324099042561	0.0251404976911251	0.0125702488455626	82.8735455274164
Arsenite	7	1	H4	4	-0.268961225009569	0.0514292782536091	0.0257146391268046	7.98338878147465
Arsenite	7	2	H4	4	-0.181359706259188	0.0665307536016353	0.0332653768008177	15.3071988122927
Arsenite	7	3	H4	4	-0.20804160750838	0.0511601051890964	0.0255800525945482	23.0926606768966
Arsenite	7	4	H4	4	-0.194199028203195	0.0379588191874637	0.0189794095937319	30.6776822728234
Arsenite	7	5	H4	4	-0.197338193427663	0.0668754100201567	0.0334377050100783	38.1505441780697
Arsenite	7	6	H4	4	-0.165021020375426	0.112470831495193	0.0562354157475966	45.6674940003541
Arsenite	7	7	H4	4	-0.152338681513301	0.0955323051403488	0.0477661525701744	53.0516553668438
Arsenite	7	8	H4	4	-0.221459302855247	0.0182037759796008	0.00910188798980038	61.0559731900587
Arsenite	7	9	H4	4	-0.317037939567233	0.102978425545199	0.0514892127725993	69.3774220223603
Arsenite	7	10	H4	4	-0.189774113733482	0.106788463833989	0.0533942319169946	76.9664999130703
Arsenite	7	11	H4	4	-0.207360846143617	0.0727446733944081	0.0363723366972041	84.7751478599991
Arsenite	7	1	H5	4	-0.279537721242357	0.0905537668513826	0.0452768834256913	7.22986254529619
Arsenite	7	2	H5	4	-0.322742294339545	0.0484067220365139	0.0242033610182569	14.6786873289247
Arsenite	7	3	H5	4	-0.268473909201126	0.0811754998405225	0.0405877499202612	22.2536058041376
Arsenite	7	4	H5	4	-0.272164460100648	0.0767008251019122	0.0383504125509561	29.3646489652651
Arsenite	7	5	H5	4	-0.296493511303284	0.0471446048460587	0.0235723024230293	36.413392788316
Arsenite	7	6	H5	4	-0.2263309119469	0.0446382124306613	0.0223191062153306	43.3154153159891
Arsenite	7	7	H5	4	-0.247266262544458	0.060051370790388	0.030025685395194	50.3883350987241
Arsenite	7	8	H5	4	-0.282742222361087	0.0560345078418585	0.0280172539209292	57.3822870967309
Arsenite	7	9	H5	4	-0.159645589678312	0.0892073011174458	0.0446036505587229	64.4637577714756
Arsenite	7	10	H5	4	-0.250743934793856	0.0597475932122994	0.0298737966061497	71.3763326418071
Arsenite	7	11	H5	4	-0.177823595358448	0.0566042748532052	0.0283021374266026	78.2536816763655
Arsenite	7	1	H6	4	-0.180134390230462	0.0434967400567408	0.0217483700283704	6.96129558085882
Arsenite	7	2	H6	4	-0.272045650176365	0.0905606291335776	0.0452803145667888	14.0043332131003
Arsenite	7	3	H6	4	-0.0604314510412564	0.0486171434885183	0.0243085717442591	20.9630650955382
Arsenite	7	4	H6	4	-0.23264805077761	0.0759236515281005	0.0379618257640503	27.9522737813778
Arsenite	7	5	H6	4	-0.138061476845425	0.0680039771552013	0.0340019885776006	34.9509397447097
Arsenite	7	6	H6	4	-0.198773050332757	0.0481480767587892	0.0240740383793946	41.7955287792295
Arsenite	7	7	H6	4	-0.201630936503229	0.0611448833500746	0.0305724416750373	48.6919453793207
Arsenite	7	8	H6	4	-0.18166986139714	0.0551660306949903	0.0275830153474952	55.4873947360284
Arsenite	7	9	H6	4	-0.0882590064301561	0.0587109418542384	0.0293554709271192	62.5972893059163
Arsenite	7	10	H6	4	-0.217122081782633	0.112081274636962	0.056040637318481	69.6166181391147
Arsenite	7	11	H6	4	-0.212286361404865	0.165346378332594	0.0826731891662971	76.6541226133071
Arsenite	7	1	H7	4	-0.232424597633464	0.0573334489169273	0.0286667244584636	7.76761581438419
Arsenite	7	2	H7	4	-0.222012041476544	0.106247480580467	0.0531237402902336	15.3679027418153
Arsenite	7	3	H7	4	-0.155983651924552	0.046298866913149	0.0231494334565745	22.995175312615
Arsenite	7	4	H7	4	-0.0728930537846784	0.0976412518683697	0.0488206259341848	29.810025531207
Arsenite	7	5	H7	4	-0.149770068646009	0.0926477137044783	0.0463238568522392	37.1880903661638
Arsenite	7	6	H7	4	-0.138254425504906	0.0971264449912326	0.0485632224956163	44.3590534236817
Arsenite	7	7	H7	4	-0.11343422489993	0.104822500430933	0.0524112502154666	51.3003806295691
Arsenite	7	8	H7	4	-0.102266424873076	0.0685096531750015	0.0342548265875007	58.4591257347751
Arsenite	7	9	H7	4	-0.0369175793233663	0.0843608403261522	0.0421804201630761	65.8154630524758
Arsenite	7	10	H7	4	-0.0995106984181863	0.134019391831063	0.0670096959155316	72.7700373535483
Arsenite	7	11	H7	4	-0.0243573929432752	0.122109444274252	0.0610547221371261	79.6931128702019
Arsenite	7	1	H8	4	-0.190914794488039	0.0763552336144712	0.0381776168072356	7.02004384140619
Arsenite	7	2	H8	4	-0.254352467113482	0.0944876344646267	0.0472438172323133	14.1848401252283
Arsenite	7	3	H8	4	-0.102791607912161	0.0363291601731692	0.0181645800865846	21.4982205095758
Arsenite	7	4	H8	4	-0.22165007987082	0.136682322349195	0.0683411611745973	28.4860830206186
Arsenite	7	5	H8	4	-0.160224719948705	0.0813614244477191	0.0406807122238595	35.4740375178481
Arsenite	7	6	H8	4	-0.16875504590596	0.109312722939833	0.0546563614699165	42.322326279624
Arsenite	7	7	H8	4	-0.24549772166642	0.120447976142838	0.0602239880714191	49.2517432882475
Arsenite	7	8	H8	4	-0.165977163477882	0.0915917563321312	0.0457958781660656	55.7738634688126
Arsenite	7	9	H8	4	-0.145511874901065	0.145264434759218	0.0726322173796092	63.0881178328336
Arsenite	7	10	H8	4	-0.229673445167901	0.10802238979577	0.0540111948978849	69.6368682162325
Arsenite	7	11	H8	4	-0.0855955060495605	0.0564514949889394	0.0282257474944697	76.3744889537069
Arsenite	7	1	H9	4	-0.258230432446142	0.146886250107361	0.0734431250536805	7.31510018738146
Arsenite	7	2	H9	4	-0.254722771083874	0.0829921677558494	0.0414960838779247	14.7516517173637
Arsenite	7	3	H9	4	-0.131698270543827	0.0470148745442297	0.0235074372721148	22.1201145324583
Arsenite	7	4	H9	4	-0.272916070916744	0.0734428125626154	0.0367214062813077	29.377129033376
Arsenite	7	5	H9	4	-0.272553157778279	0.139866044188427	0.0699330220942134	36.9377874794937
Arsenite	7	6	H9	4	-0.183753224692165	0.0755102115516574	0.0377551057758287	44.440969540123
Arsenite	7	7	H9	4	-0.191476429360409	0.111276353774838	0.055638176887419	51.5048400385693
Arsenite	7	8	H9	4	-0.236725265063073	0.0436412376272273	0.0218206188136137	59.1303602171779
Arsenite	7	9	H9	4	-0.243081720585658	0.105410694282132	0.0527053471410662	67.5445692165074
Arsenite	7	10	H9	4	-0.10932896449996	0.0395045280510922	0.0197522640255461	74.8622511445278
Arsenite	7	11	H9	4	-0.122512937597444	0.0674670269175718	0.0337335134587859	82.7038563384082
Glycine	20	1	A1	4	-0.3964995973835	0.0315341376973374	0.0157670688486687	5.02971984229785
Glycine	20	2	A1	4	-0.336623016559242	0.106987073186122	0.0534935365930612	10.0466847220467
Glycine	20	3	A1	4	-0.434469811629513	0.0685335153378237	0.0342667576689118	15.3003018776428
Glycine	20	4	A1	4	-0.316623611400289	0.0871418732437228	0.0435709366218614	20.2688964221049
Glycine	20	5	A1	4	-0.38095432529853	0.0408556175169305	0.0204278087584652	25.3762768744854
Glycine	20	6	A1	4	-0.291674943206805	0.0492715959046231	0.0246357979523116	30.2843224255563
Glycine	20	7	A1	4	-0.138670001509972	0.112560056656197	0.0562800283280983	34.9409213427759
Glycine	20	8	A1	4	-0.271854630235828	0.170103176037531	0.0850515880187657	39.8912767708423
Glycine	20	9	A1	4	-0.240852909029825	0.0486713665996342	0.0243356832998171	45.4236623604024
Glycine	20	10	A1	4	-0.244559955903103	0.049008262607579	0.0245041313037895	50.410875306831
Glycine	20	11	A1	4	-0.168644269574534	0.057954497588947	0.0289772487944735	55.5168997731546
Glycine	20	1	A10	4	-0.443639161247832	0.0712699297160804	0.0356349648580402	5.3602467021915
Glycine	20	2	A10	4	-0.470187300028794	0.0551841733335651	0.0275920866667826	10.7927813675287
Glycine	20	3	A10	4	-0.463757399913224	0.0341024829239649	0.0170512414619825	16.2476644084363
Glycine	20	4	A10	4	-0.443277721795008	0.0696003854897334	0.0348001927448667	21.7786681494559
Glycine	20	5	A10	4	-0.446057043601041	0.0431073365626468	0.0215536682813234	27.1469151489106
Glycine	20	6	A10	4	-0.441431249568937	0.0742171184345451	0.0371085592172725	32.4507028723298
Glycine	20	7	A10	4	-0.425378315505286	0.0841708260066115	0.0420854130033058	37.8683375764148
Glycine	20	8	A10	4	-0.366754331664857	0.0335366667783579	0.0167683333891789	43.1484049623351
Glycine	20	9	A10	4	-0.39008941571806	0.0353174934898478	0.0176587467449239	48.4040537863785
Glycine	20	10	A10	4	-0.3395552898675	0.0820781372770238	0.0410390686385119	53.5313905057838
Glycine	20	11	A10	4	-0.368270107384014	0.0517505016220367	0.0258752508110183	58.8738827711783
Glycine	20	1	A11	4	-0.359273111542362	0.0356754097834582	0.0178377048917291	5.25935353979129
Glycine	20	2	A11	4	-0.223391065275335	0.061518835308951	0.0307594176544755	10.3017604582119
Glycine	20	3	A11	4	-0.245669080835404	0.0526317195777792	0.0263158597888896	15.2140842872695
Glycine	20	4	A11	4	-0.14674797656738	0.0666599325548441	0.0333299662774221	19.9972389724339
Glycine	20	5	A11	4	-0.195339776446524	0.0498497844901566	0.0249248922450783	25.1734336395998
Glycine	20	6	A11	4	-0.0998405082556749	0.0507546577071794	0.0253773288535897	30.0593899264156
Glycine	20	7	A11	4	0.0281640546560727	0.0894157964716938	0.0447078982358469	34.5894586673677
Glycine	20	8	A11	4	-0.00904076805068965	0.0936146943439606	0.0468073471719803	39.2057781227539
Glycine	20	9	A11	4	-0.114491242936825	0.0725706965507862	0.0362853482753931	44.246958865365
Glycine	20	10	A11	4	0.0507738716619694	0.0589015476564608	0.0294507738282304	48.8352659851641
Glycine	20	11	A11	4	-0.0488813501172427	0.0476495391420815	0.0238247695710407	54.0461973932295
Glycine	20	1	A12	4	-0.467141520171213	0.0238162433865187	0.0119081216932593	5.58951326501459
Glycine	20	2	A12	4	-0.472726242599331	0.048431912323643	0.0242159561618215	11.2476484349963
Glycine	20	3	A12	4	-0.424056408101927	0.0291163138718979	0.014558156935949	16.7809992142695
Glycine	20	4	A12	4	-0.497378456540693	0.190672542381669	0.0953362711908343	22.2767141637482
Glycine	20	5	A12	4	-0.383366136617758	0.015562519554034	0.00778125977701701	27.7276345689281
Glycine	20	6	A12	4	-0.425315893582763	0.0574681577445989	0.0287340788722995	33.1408349782576
Glycine	20	7	A12	4	-0.3903851706297	0.0403433007302488	0.0201716503651244	38.6576469161016
Glycine	20	8	A12	4	-0.378249023062989	0.024434417918347	0.0122172089591735	44.0499110662211
Glycine	20	9	A12	4	-0.407084230397826	0.0234337255056291	0.0117168627528145	49.5596465692768
Glycine	20	10	A12	4	-0.327778026302625	0.0172053232535803	0.00860266162679016	54.7963986442108
Glycine	20	11	A12	4	-0.405387927822739	0.014344467776129	0.0071722338880645	60.2816813954457
Glycine	20	1	A2	4	-0.430689901228572	0.062838565750555	0.0314192828752775	5.17833315215601
Glycine	20	2	A2	4	-0.428777421911298	0.0550221014013531	0.0275110507006765	10.4242918787009
Glycine	20	3	A2	4	-0.374426220997067	0.0154528608356839	0.00772643041784193	15.5095045502371
Glycine	20	4	A2	4	-0.33193577274039	0.0743284053271147	0.0371642026635574	20.4747383940315
Glycine	20	5	A2	4	-0.395577099178318	0.0449843317270234	0.0224921658635117	25.4608969801222
Glycine	20	6	A2	4	-0.322433598228905	0.0186041010431152	0.0093020505215576	30.2745841525003
Glycine	20	7	A2	4	-0.192190272837758	0.0923419772084893	0.0461709886042447	34.8699544082214
Glycine	20	8	A2	4	-0.251773097450164	0.0502944795469688	0.0251472397734844	39.5743736355737
Glycine	20	9	A2	4	-0.270504207431098	0.0528303494618116	0.0264151747309058	44.5251055489227
Glycine	20	10	A2	4	-0.154300921801709	0.0472647639652502	0.0236323819826251	49.1022502722466
Glycine	20	11	A2	3	-0.236432338520113	0.0352765512913534	0.0203669263841445	54.7187857156471
Glycine	20	1	A3	4	-0.432825433765262	0.0724846901613207	0.0362423450806604	5.1634028013935
Glycine	20	2	A3	4	-0.479422689800226	0.104682604453488	0.0523413022267438	10.41140103206
Glycine	20	3	A3	4	-0.467276551758753	0.0955796513799888	0.0477898256899944	15.6986656938841
Glycine	20	4	A3	4	-0.400027906146834	0.0692235306707576	0.0346117653353788	20.8714977046274
Glycine	20	5	A3	4	-0.444938857313001	0.0657085149234896	0.0328542574617448	26.0339107128917
Glycine	20	6	A3	4	-0.400782286414104	0.0810826571602475	0.0405413285801238	31.0931094611726
Glycine	20	7	A3	4	-0.361565526824036	0.0668548676190064	0.0334274338095032	36.0495453700645
Glycine	20	8	A3	4	-0.326437300715888	0.0888002250495526	0.0444001125247763	40.9521176217283
Glycine	20	9	A3	4	-0.388066142501117	0.0240993169226956	0.0120496584613478	46.0426404122311
Glycine	20	10	A3	4	-0.278846654837664	0.0506173422903686	0.0253086711451843	50.7884227493288
Glycine	20	11	A3	4	-0.35210765007466	0.0524661728763378	0.0262330864381689	55.9593671074966
Glycine	20	1	A4	4	-0.475274936420361	0.0215344390737013	0.0107672195368506	5.02405522735095
Glycine	20	2	A4	4	-0.459431037784072	0.0687419444097283	0.0343709722048642	10.1938841701647
Glycine	20	3	A4	4	-0.444786518013268	0.0706381250805475	0.0353190625402737	15.325862309786
Glycine	20	4	A4	4	-0.422025947588939	0.072741159414787	0.0363705797073935	20.427905726147
Glycine	20	5	A4	4	-0.431795503687068	0.0474074816151866	0.0237037408075933	25.6187993382525
Glycine	20	6	A4	4	-0.465079915089077	0.0541701301200938	0.0270850650600469	30.7081728102062
Glycine	20	7	A4	4	-0.332510357417003	0.0664229665761018	0.0332114832880509	35.5719643788133
Glycine	20	8	A4	4	-0.372918321469905	0.0535352028781293	0.0267676014390647	40.5594604289338
Glycine	20	9	A4	4	-0.414039975061872	0.0351687712157007	0.0175843856078503	45.6958901283441
Glycine	20	10	A4	4	-0.329763461546807	0.0912154616055704	0.0456077308027852	50.6269710187952
Glycine	20	11	A4	4	-0.413871282546761	0.0216651592116095	0.0108325796058048	55.7940974931595
Glycine	20	1	A5	4	-0.430609540814523	0.0544537828162978	0.0272268914081489	4.98186306673169
Glycine	20	2	A5	4	-0.467240943446523	0.0645886549411946	0.0322943274705973	10.1236692607834
Glycine	20	3	A5	4	-0.412169042843091	0.0445522198692499	0.022276109934625	15.2188724121801
Glycine	20	4	A5	4	-0.385697700875626	0.0411650718191665	0.0205825359095833	20.1378772535994
Glycine	20	5	A5	4	-0.446926535608012	0.0647294109273699	0.0323647054636849	25.1003875655189
Glycine	20	6	A5	4	-0.377916042404219	0.0412135888775561	0.020606794438778	29.9499542817493
Glycine	20	7	A5	4	-0.225572582667757	0.0649522617574367	0.0324761308787183	34.5223077106817
Glycine	20	8	A5	4	-0.195960027830404	0.0527851942309252	0.0263925971154626	38.9945931762264
Glycine	20	9	A5	4	-0.284911712774601	0.0565679096944703	0.0282839548472351	43.7705675516978
Glycine	20	10	A5	4	-0.137252595963142	0.0645853446744587	0.0322926723372293	48.1488029810857
Glycine	20	11	A5	4	-0.149966848600224	0.0154349587416127	0.00771747937080633	52.9086381683109
Glycine	20	1	A6	4	-0.380313029184299	0.0513518897860771	0.0256759448930385	4.82114594468672
Glycine	20	2	A6	4	-0.328328468525639	0.0451475349533953	0.0225737674766976	9.56386408778799
Glycine	20	3	A6	4	-0.271778409925391	0.0252140114470972	0.0126070057235486	14.3998881927816
Glycine	20	4	A6	4	-0.207029512547911	0.050804866633951	0.0254024333169755	18.8979380242878
Glycine	20	5	A6	4	-0.190819739854472	0.0508400393913667	0.0254200196956833	23.6500167157736
Glycine	20	6	A6	4	-0.143392169879125	0.0834639485623939	0.0417319742811969	28.0586858398469
Glycine	20	7	A6	4	-0.0481069245907721	0.0824850321794684	0.0412425160897342	32.3852082940833
Glycine	20	8	A6	4	-0.0554700234836969	0.0257633483532609	0.0128816741766304	36.7196482846966
Glycine	20	9	A6	4	-0.0838450574407427	0.0410564290838926	0.0205282145419463	41.3664649579995
Glycine	20	10	A6	4	-0.0672559225806089	0.0275319862304474	0.0137659931152237	45.821637002759
Glycine	20	11	A6	4	-0.0591036005370247	0.0442854145204337	0.0221427072602168	50.2940128932583
Glycine	20	1	A7	4	-0.503964530159594	0.0351117835298092	0.0175558917649046	4.97865474647578
Glycine	20	2	A7	4	-0.406466683744389	0.0420999859090499	0.021049992954525	9.78599816772732
Glycine	20	3	A7	4	-0.472613052711428	0.0831357753355102	0.0415678876677551	14.6791868618078
Glycine	20	4	A7	4	-0.416392765913584	0.0307270911703637	0.0153635455851819	19.5135082494957
Glycine	20	5	A7	4	-0.425414964665942	0.0713040694040774	0.0356520347020387	24.4156092173703
Glycine	20	6	A7	4	-0.444576822003603	0.0600829659487934	0.0300414829743967	29.2733003074499
Glycine	20	7	A7	4	-0.374161688874454	0.020031142947461	0.0100155714737305	34.1085638085972
Glycine	20	8	A7	4	-0.348220389729685	0.0510543249470208	0.0255271624735104	38.8878967089448
Glycine	20	9	A7	4	-0.467734774849093	0.054105781987534	0.027052890993767	43.7687891509029
Glycine	20	10	A7	4	-0.370601628172362	0.0564682216998244	0.0282341108499122	48.6311666627258
Glycine	20	11	A7	4	-0.487025633402065	0.0505975778274581	0.0252987889137291	53.3933235730525
Glycine	20	1	A8	4	0.0403851105427574	0.134222623550896	0.0671113117754478	4.40207599043933
Glycine	20	2	A8	4	0.0366088177910925	0.0840097236853496	0.0420048618426748	8.68453383626937
Glycine	20	3	A8	4	-0.00191609965839545	0.0795645460482487	0.0397822730241243	13.3712441240788
Glycine	20	4	A8	4	0.107071563820293	0.113225622227331	0.0566128111136653	17.602772036788
Glycine	20	5	A8	4	-0.00644694565910442	0.0546054044315868	0.0273027022157934	22.5425468957401
Glycine	20	6	A8	4	0.00818875541094588	0.0871107242443958	0.0435553621221979	27.3565713396852
Glycine	20	7	A8	4	0.0162637033563205	0.0396101968386361	0.0198050984193181	31.6886382761375
Glycine	20	8	A8	4	0.0857772859373107	0.155457834686614	0.0777289173433068	36.0981042865521
Glycine	20	9	A8	4	0.041676179886438	0.102168397313064	0.051084198656532	40.8383234866739
Glycine	20	10	A8	4	0.0676230898030619	0.113277365791659	0.0566386828958296	45.1855491055485
Glycine	20	11	A8	4	0.00137326997417708	0.0843337707346134	0.0421668853673067	49.9653213281209
Glycine	20	1	A9	4	-0.037285298991829	0.0460620329319043	0.0230310164659521	4.59088178859191
Glycine	20	2	A9	4	0.027744996973461	0.0989913362536534	0.0494956681268267	9.01043125158078
Glycine	20	3	A9	4	-0.0082386652582912	0.0504052722453813	0.0252026361226906	13.6586285205596
Glycine	20	4	A9	4	0.0709960657625607	0.0866891265732467	0.0433445632866234	18.0329012758421
Glycine	20	5	A9	4	-0.0476450232698251	0.0387032018234124	0.0193516009117062	23.2051064542971
Glycine	20	6	A9	3	-0.0249885653089552	0.0126522733182006	0.00730479340612383	27.8573332874751
Glycine	20	7	A9	4	0.0365066839040473	0.127320419124722	0.0636602095623611	32.2901963794314
Glycine	20	8	A9	4	0.0395363258828383	0.114801102147847	0.0574005510739233	36.8107441836131
Glycine	20	9	A9	4	-0.0272379990921413	0.0204511157754865	0.0102255578877433	41.4945213750749
Glycine	20	10	A9	4	0.0224872813976217	0.116169528450508	0.058084764225254	46.0331121917031
Glycine	20	11	A9	4	-0.0866079654899958	0.0109917820140559	0.00549589100702796	51.1311025106293
Glycine	20	1	B1	4	-0.0351908870825922	0.0364209671999765	0.0182104835999883	4.71914532806675
Glycine	20	2	B1	4	-0.0173207257866838	0.02649550825337	0.013247754126685	9.22693617833201
Glycine	20	3	B1	4	-0.0110801876631555	0.0323817826666883	0.0161908913333442	13.7771288119518
Glycine	20	4	B1	4	-0.0187277248035946	0.0449744945670775	0.0224872472835387	18.2093880138113
Glycine	20	5	B1	4	-0.0114671580953819	0.0402761191878275	0.0201380595939137	22.8272932561037
Glycine	20	6	B1	4	-0.0621709622861814	0.0790536735758629	0.0395268367879314	27.4210459220019
Glycine	20	7	B1	4	0.010097787117331	0.0466122501452573	0.0233061250726287	31.8760557886482
Glycine	20	8	B1	4	-0.0562953859295227	0.029948439379834	0.014974219689917	36.7060821928432
Glycine	20	9	B1	4	-0.0495477010877404	0.0106407344004142	0.00532036720020711	41.7475998152526
Glycine	20	10	B1	4	-0.0476761300878831	0.0303740039618062	0.0151870019809031	46.6736390712128
Glycine	20	11	B1	4	-0.107385938442817	0.0719609641470456	0.0359804820735228	51.8709281518496
Glycine	20	1	B10	4	-0.420813147269767	0.0535787527159109	0.0267893763579555	5.40538731466784
Glycine	20	2	B10	4	-0.446395161684801	0.0394877527112946	0.0197438763556473	10.7551304851212
Glycine	20	3	B10	4	-0.428813398873269	0.0428214763370058	0.0214107381685029	16.0073794897505
Glycine	20	4	B10	4	-0.466377442262509	0.0385368438778163	0.0192684219389081	21.4347353231248
Glycine	20	5	B10	4	-0.415731653609982	0.0338174490447549	0.0169087245223775	26.7697324423072
Glycine	20	6	B10	4	-0.471947263366411	0.0479195270063856	0.0239597635031928	32.1668435627781
Glycine	20	7	B10	4	-0.457561815928121	0.0493795935479289	0.0246897967739645	37.5875713466177
Glycine	20	8	B10	4	-0.484417398387288	0.0836550544450223	0.0418275272225112	43.2488114653354
Glycine	20	9	B10	4	-0.404012744108693	0.0269883420543832	0.0134941710271916	48.7604525283221
Glycine	20	10	B10	3	-0.445026086262554	0.0229341734149192	0.0132410511947452	54.3188176352691
Glycine	20	11	B10	4	-0.445954397759213	0.0617108764228183	0.0308554382114091	60.018210110375
Glycine	20	1	B11	4	-0.400542455302037	0.0323767294478299	0.0161883647239149	5.47193705636395
Glycine	20	2	B11	4	-0.345705380029046	0.0220177090038617	0.0110088545019308	10.6231823029085
Glycine	20	3	B11	4	-0.309825247068369	0.0311553557046008	0.0155776778523004	15.8149134775139
Glycine	20	4	B11	4	-0.330103813902164	0.0729050080856374	0.0364525040428187	20.8760452643536
Glycine	20	5	B11	4	-0.247403809193701	0.0292483566522603	0.0146241783261301	25.9599847091175
Glycine	20	6	B11	4	-0.241021451104256	0.0608903656218608	0.0304451828109304	30.9932851685739
Glycine	20	7	B11	4	-0.211398447626622	0.0270301742269947	0.0135150871134974	36.2455623772707
Glycine	20	8	B11	4	-0.170349478437527	0.0513353916586654	0.0256676958293327	41.3128574748725
Glycine	20	9	B11	4	-0.0698822565818625	0.0381848747942826	0.0190924373971413	46.3445637223806
Glycine	20	10	B11	4	-0.157858831535856	0.0505339248956661	0.025266962447833	51.6679012430719
Glycine	20	11	B11	4	-0.0409926051493481	0.0500274638962226	0.0250137319481113	56.9413686253933
Glycine	20	1	B12	4	-0.00181288513659839	0.0435735811314517	0.0217867905657258	4.55559834409051
Glycine	20	2	B12	4	0.0277026143307395	0.0364118185524357	0.0182059092762178	9.15615809958359
Glycine	20	3	B12	4	-0.00597519353693299	0.0274807706941856	0.0137403853470928	14.1004799302255
Glycine	20	4	B12	4	0.000514908466195951	0.044618379662842	0.022309189831421	18.8710680916023
Glycine	20	5	B12	4	-0.0701970410709296	0.113960428209502	0.0569802141047512	23.5748414663363
Glycine	20	6	B12	4	-0.019033553810367	0.026939282735284	0.013469641367642	28.4048412422562
Glycine	20	7	B12	4	0.00161490038736556	0.0536330543799088	0.0268165271899544	33.52581391625
Glycine	20	8	B12	4	-0.0245183034011446	0.0673399324304928	0.0336699662152464	38.3558305930688
Glycine	20	9	B12	4	-0.0901470875629661	0.0410495437754562	0.0205247718877281	43.342419195507
Glycine	20	10	B12	4	0.0108998211865803	0.0865255189927462	0.0432627594963731	48.1510417745788
Glycine	20	11	B12	4	-0.100215716725676	0.0300849268283146	0.0150424634141573	53.4757218366045
Glycine	20	1	B2	4	-0.372893485301518	0.0421527960420377	0.0210763980210189	5.22817085659791
Glycine	20	2	B2	4	-0.385383559466714	0.0445973773102991	0.0222986886551495	10.373249181552
Glycine	20	3	B2	4	-0.368350965984428	0.0295015144128784	0.0147507572064392	15.565529331903
Glycine	20	4	B2	4	-0.298414458859301	0.0469672329315004	0.0234836164657502	20.4839356177071
Glycine	20	5	B2	4	-0.272356565542204	0.039070373531739	0.0195351867658695	25.3570406222326
Glycine	20	6	B2	4	-0.238792197608086	0.0462228016334263	0.0231114008167131	30.2003564138821
Glycine	20	7	B2	4	-0.18060450304888	0.0321565477400986	0.0160782738700493	35.0854004640403
Glycine	20	8	B2	4	-0.169600851985422	0.0649866807109736	0.0324933403554868	39.8903121168574
Glycine	20	9	B2	4	-0.202585322684126	0.0479309109617733	0.0239654554808867	44.8095150023667
Glycine	20	10	B2	4	-0.108448459564071	0.0493421937821653	0.0246710968910826	49.8059789669285
Glycine	20	11	B2	4	-0.0774532883419885	0.0366122288605222	0.0183061144302611	54.9769369063652
Glycine	20	1	B3	4	-0.384886367512402	0.0382206994331794	0.0191103497165897	5.25789266499645
Glycine	20	2	B3	4	-0.378634911932661	0.0366740370628361	0.0183370185314181	10.4218756373247
Glycine	20	3	B3	4	-0.402855660167598	0.0553939150026962	0.0276969575013481	15.6088135130966
Glycine	20	4	B3	4	-0.353070975002246	0.0324531901169198	0.0162265950584599	20.6236679778601
Glycine	20	5	B3	4	-0.355087638675781	0.0187514463119703	0.00937572315598516	25.6689996865823
Glycine	20	6	B3	4	-0.325101705457902	0.00765968478383418	0.00382984239191709	30.6109450989049
Glycine	20	7	B3	4	-0.24591563828145	0.0413509912421209	0.0206754956210604	35.5702253421963
Glycine	20	8	B3	4	-0.238131123434862	0.0268669271066398	0.0134334635533199	40.5903011278267
Glycine	20	9	B3	4	-0.246747327655648	0.0142032550253497	0.00710162751267483	45.397997235217
Glycine	20	10	B3	4	-0.193615766405952	0.0459637390655026	0.0229818695327513	50.3489786887637
Glycine	20	11	B3	4	-0.141670604533087	0.0247813900771366	0.0123906950385683	55.2834487742783
Glycine	20	1	B4	4	-0.469653820400836	0.0658904916134176	0.0329452458067088	5.16221481213907
Glycine	20	2	B4	4	-0.463783378801289	0.0471677235338867	0.0235838617669433	10.3748851237377
Glycine	20	3	B4	4	-0.463195154660112	0.0318224635876993	0.0159112317938497	15.7020704179278
Glycine	20	4	B4	4	-0.455717812231182	0.0339073585572579	0.0169536792786289	20.8784456895537
Glycine	20	5	B4	4	-0.440575459147586	0.0288900884338311	0.0144450442169155	25.9704752465308
Glycine	20	6	B4	4	-0.490649384813301	0.0531710042192011	0.0265855021096006	31.1173367372279
Glycine	20	7	B4	4	-0.44001778137387	0.0441031943075227	0.0220515971537614	36.2406054625792
Glycine	20	8	B4	4	-0.461009283198082	0.0433758664996603	0.0216879332498302	41.3261403944334
Glycine	20	9	B4	4	-0.452224746896276	0.0619120117029263	0.0309560058514632	46.5072770166078
Glycine	20	10	B4	4	-0.421096339001551	0.0154850203185513	0.00774251015927565	51.7188307898206
Glycine	20	11	B4	4	-0.368530333178696	0.0703700577749261	0.0351850288874631	56.9240936901997
Glycine	20	1	B5	4	-0.375278942370984	0.0593383089417387	0.0296691544708694	5.07729212198649
Glycine	20	2	B5	4	-0.32697719939565	0.0305108319923099	0.015255415996155	10.1311026960653
Glycine	20	3	B5	4	-0.346411243883202	0.0367189741456325	0.0183594870728163	15.1447276653629
Glycine	20	4	B5	4	-0.281407932775301	0.0407992152705216	0.0203996076352608	19.97998047555
Glycine	20	5	B5	4	-0.236508274249251	0.0748520579477384	0.0374260289738692	24.9631221396977
Glycine	20	6	B5	4	-0.152916168800935	0.0535666413523374	0.0267833206761687	29.6248794409143
Glycine	20	7	B5	4	-0.112032858061039	0.05314143997834	0.02657071998917	34.3328327811029
Glycine	20	8	B5	4	-0.0851216855777637	0.0622458984192651	0.0311229492096326	39.0520399928585
Glycine	20	9	B5	4	-0.0374854795171595	0.043604648290999	0.0218023241454995	43.8505153771699
Glycine	20	10	B5	4	-0.0478687868824667	0.0700496813388714	0.0350248406694357	48.9031986751361
Glycine	20	11	B5	4	0.0277323327441029	0.0767094356089729	0.0383547178044864	53.7106037872782
Glycine	20	1	B6	4	-0.274091716583615	0.0371490518068346	0.0185745259034173	5.31688876287571
Glycine	20	2	B6	4	-0.23929750005321	0.0458592849787613	0.0229296424893806	10.395384696436
Glycine	20	3	B6	4	-0.232409269083231	0.0668832637811799	0.03344163189059	15.6868356437022
Glycine	20	4	B6	4	-0.226610970133905	0.043147256166099	0.0215736280830495	20.717837178623
Glycine	20	5	B6	4	-0.186411317992829	0.034157436565453	0.0170787182827265	25.7179359358072
Glycine	20	6	B6	4	-0.139745109379065	0.0337483281325494	0.0168741640662747	30.5051463203523
Glycine	20	7	B6	4	-0.122926122094877	0.0508136124657942	0.0254068062328971	35.4511475926023
Glycine	20	8	B6	4	-0.160713151315003	0.0149099548732443	0.00745497743662213	40.4837896098138
Glycine	20	9	B6	4	-0.15686983145078	0.13188160111482	0.0659408005574102	45.3542665096822
Glycine	20	10	B6	4	-0.161935833350193	0.0860029594145062	0.0430014797072531	50.486420817077
Glycine	20	11	B6	4	-0.0753064709029938	0.0407449009457149	0.0203724504728575	55.3074675860268
Glycine	20	1	B7	4	-0.408451467038526	0.0409259799301763	0.0204629899650881	5.07578048030422
Glycine	20	2	B7	4	-0.466304612452496	0.0416843380797315	0.0208421690398657	10.1893758584367
Glycine	20	3	B7	4	-0.435275013913725	0.0365213202054806	0.0182606601027403	15.2365537822873
Glycine	20	4	B7	4	-0.434668184544858	0.0535456519613636	0.0267728259806818	20.2133446280982
Glycine	20	5	B7	4	-0.360983631243632	0.070166402829086	0.035083201414543	25.2038283794625
Glycine	20	6	B7	4	-0.328112705420597	0.0574710088376293	0.0287355044188147	29.8953375511216
Glycine	20	7	B7	3	-0.331180231235172	0.0372623218207836	0.0215134115338599	34.4060279852709
Glycine	20	8	B7	4	-0.272995234685257	0.0383590677347623	0.0191795338673811	39.3889318117388
Glycine	20	9	B7	4	-0.199716533585304	0.0505671495450605	0.0252835747725303	44.1415524870984
Glycine	20	10	B7	4	-0.159858508232199	0.0376683236298431	0.0188341618149216	49.0756088707007
Glycine	20	11	B7	4	-0.0795058440499038	0.0288444870411967	0.0144222435205983	53.7210457829285
Glycine	20	1	B8	4	-0.40171362954169	0.031932177565907	0.0159660887829535	5.14800748039413
Glycine	20	2	B8	4	-0.366017554388748	0.092961112365527	0.0464805561827635	10.1363296085532
Glycine	20	3	B8	4	-0.484489528122442	0.0611584276453259	0.0305792138226629	15.7770257083483
Glycine	20	4	B8	4	-0.416827663891712	0.112945850193297	0.0564729250966483	21.1445854768737
Glycine	20	5	B8	4	-0.477711922396102	0.0546835568116254	0.0273417784058127	26.8706535603641
Glycine	20	6	B8	4	-0.439435688211413	0.075679382487277	0.0378396912436385	32.2600566323049
Glycine	20	7	B8	4	-0.454130015096573	0.057568919049231	0.0287844595246155	37.8661509642975
Glycine	20	8	B8	4	-0.434869514707793	0.0542807398235128	0.0271403699117564	43.5526908631005
Glycine	20	9	B8	4	-0.452837023286281	0.0539459643290882	0.0269729821645441	49.2248585402995
Glycine	20	10	B8	4	-0.424036291685816	0.0262493605174659	0.013124680258733	54.9372799707797
Glycine	20	11	B8	4	-0.370523405100102	0.0765827550550796	0.0382913775275398	60.2317181233353
Glycine	20	1	B9	4	-0.441376165427876	0.0646276557804775	0.0323138278902388	5.48414477730178
Glycine	20	2	B9	3	-0.428127761437118	0.0903946315293041	0.0521893648467408	10.4603930911042
Glycine	20	3	B9	4	-0.395456843152017	0.0688160404333837	0.0344080202166919	15.5774887237565
Glycine	20	4	B9	4	-0.389020778315633	0.0550395593367574	0.0275197796683787	20.6933353897411
Glycine	20	5	B9	4	-0.342303426975074	0.0566646168178505	0.0283323084089253	25.7977116496528
Glycine	20	6	B9	4	-0.233117242614663	0.0598951210886784	0.0299475605443392	30.7328995256174
Glycine	20	7	B9	4	-0.184648453293716	0.0275750905150032	0.0137875452575016	35.6320083978646
Glycine	20	8	B9	4	-0.122351553204207	0.0289126415415258	0.0144563207707629	40.7305753471454
Glycine	20	9	B9	4	-0.109954254813977	0.0230523228335242	0.0115261614167621	45.7960045117243
Glycine	20	10	B9	4	-0.097774909359442	0.0820950513460271	0.0410475256730136	51.1139853981642
Glycine	20	11	B9	4	-0.11831179098103	0.0714490235312356	0.0357245117656178	56.4405696486942
Glycine	20	1	C1	4	-0.0407644810143236	0.0394204356547028	0.0197102178273514	4.62618244878151
Glycine	20	2	C1	4	-0.0122091340560666	0.0623412606585893	0.0311706303292947	9.229451749189
Glycine	20	3	C1	4	0.00526137390989589	0.0503700633816738	0.0251850316908369	13.772533579645
Glycine	20	4	C1	4	-0.00178231309284982	0.0471934764250445	0.0235967382125223	18.2968621511022
Glycine	20	5	C1	4	0.00385412489483439	0.081633618007531	0.0408168090037655	22.9857642954737
Glycine	20	6	C1	4	-0.0390317535851702	0.0225888679489259	0.011294433974463	27.7277936284494
Glycine	20	7	C1	4	0.0372855120440418	0.0282127017407605	0.0141063508703802	32.0421180936467
Glycine	20	8	C1	4	-0.0221728227911485	0.015156086468143	0.00757804323407152	36.7510691605231
Glycine	20	9	C1	4	-0.0810563907996614	0.0631113117726936	0.0315556558863468	41.6222116399557
Glycine	20	10	C1	4	0.0210911396192394	0.037049703748005	0.0185248518740025	46.3540833397811
Glycine	20	11	C1	4	-0.0493315040157225	0.0371912759754312	0.0185956379877156	51.1681780419982
Glycine	20	1	C10	4	-0.392597898123692	0.0698235677634029	0.0349117838817015	5.34695993738919
Glycine	20	2	C10	4	-0.431418274972995	0.0323889660204766	0.0161944830102383	10.6193920140043
Glycine	20	3	C10	4	-0.458629000298683	0.0767378849663433	0.0383689424831716	15.8620084944073
Glycine	20	4	C10	4	-0.390437686104998	0.0206424987458592	0.0103212493729296	21.1300436999048
Glycine	20	5	C10	4	-0.384811037669688	0.0339284381374658	0.0169642190687329	26.3678474018706
Glycine	20	6	C10	4	-0.361578762605572	0.0525427762843689	0.0262713881421845	31.5241302770138
Glycine	20	7	C10	4	-0.419567310960386	0.0418466603041268	0.0209233301520634	36.8015701427548
Glycine	20	8	C10	4	-0.329742205418077	0.0272794738001119	0.013639736900056	42.0055937022009
Glycine	20	9	C10	4	-0.362063355937401	0.0514479238629319	0.025723961931466	47.3323753422825
Glycine	20	10	C10	4	-0.359152857802252	0.0189156716634556	0.00945783583172781	52.7393295188683
Glycine	20	11	C10	4	-0.332067538803152	0.0361529425022505	0.0180764712511252	58.0414189165838
Glycine	20	1	C11	4	-0.402925454841465	0.0190339858461229	0.00951699292306143	5.32262749164548
Glycine	20	2	C11	4	-0.395719606339703	0.0356750016853683	0.0178375008426842	10.5500828794709
Glycine	20	3	C11	4	-0.366513832469794	0.0638643122972415	0.0319321561486208	15.770370159722
Glycine	20	4	C11	4	-0.402816274066105	0.061319166032769	0.0306595830163845	21.0836082566305
Glycine	20	5	C11	4	-0.32964414049868	0.040699320816008	0.020349660408004	26.3282073981048
Glycine	20	6	C11	4	-0.31253393777826	0.00975246477951331	0.00487623238975666	31.4443428638384
Glycine	20	7	C11	4	-0.311235212445396	0.0238034035340605	0.0119017017670303	36.8269283998405
Glycine	20	8	C11	4	-0.245200202376166	0.0636930822069907	0.0318465411034953	41.9857506109383
Glycine	20	9	C11	4	-0.145600720479617	0.0742434735001118	0.0371217367500559	46.9050894762484
Glycine	20	10	C11	4	-0.204399994859021	0.0705650554864694	0.0352825277432347	52.1231263239303
Glycine	20	11	C11	4	-0.0998687360167205	0.0404486117141469	0.0202243058570735	57.1060150226765
Glycine	20	1	C12	4	0.0207967645025259	0.048797176560288	0.024398588280144	4.45111578664164
Glycine	20	2	C12	4	0.0552887689867796	0.052696384485751	0.0263481922428755	8.94507018317665
Glycine	20	3	C12	4	-0.0124422707647386	0.0265557219756867	0.0132778609878433	14.0123410997571
Glycine	20	4	C12	4	-0.0264511707390995	0.0509062085414561	0.025453104270728	18.7581749792631
Glycine	20	5	C12	4	-0.0857662864765636	0.0794121087467595	0.0397060543733798	23.6217857784853
Glycine	20	6	C12	4	-0.0449686234070271	0.0201353270375994	0.0100676635187997	28.3450855274284
Glycine	20	7	C12	4	0.00226649396284273	0.0605321384974822	0.0302660692487411	33.1791945413517
Glycine	20	8	C12	4	-0.0369363985630939	0.0382780577399248	0.0191390288699624	37.9565469342152
Glycine	20	9	C12	4	-0.0395590024095026	0.044312990997293	0.0221564954986465	42.7280897103428
Glycine	20	10	C12	4	-0.0891625353702237	0.0203207165492692	0.0101603582746346	47.4993673643553
Glycine	20	11	C12	4	-0.0806347547487879	0.0600445668022514	0.0300222834011257	52.6040380286036
Glycine	20	1	C2	4	-0.197047562260465	0.043400911167599	0.0217004555837995	5.32667172236024
Glycine	20	2	C2	4	-0.146038225611139	0.0252679269986304	0.0126339634993152	9.96476218212809
Glycine	20	3	C2	4	-0.128850444988765	0.0273008427107549	0.0136504213553775	14.6349589738005
Glycine	20	4	C2	4	-0.0929758803685276	0.0602362209591048	0.0301181104795524	19.290036649121
Glycine	20	5	C2	4	-0.0859465029015936	0.0175590290644522	0.00877951453222608	23.8136086318225
Glycine	20	6	C2	4	-0.0602323454957567	0.0295516442085422	0.0147758221042711	28.4175886374982
Glycine	20	7	C2	4	-0.0665429873164445	0.0697786688415156	0.0348893344207578	33.0877290290618
Glycine	20	8	C2	4	-0.0992733580311053	0.00676232987898901	0.00338116493949451	37.554381000352
Glycine	20	9	C2	4	-0.0374462762955499	0.048125605192855	0.0240628025964275	42.0712741919931
Glycine	20	10	C2	4	-0.0693693500445065	0.0569472317697441	0.028473615884872	46.5593514080456
Glycine	20	11	C2	4	-0.0661297654962978	0.0299205083948324	0.0149602541974162	51.0785564391697
Glycine	20	1	C3	4	-0.075737076969886	0.0335008299605089	0.0167504149802544	5.15103898279393
Glycine	20	2	C3	4	-0.0576724698221972	0.0214942891096912	0.0107471445548456	9.67884902312064
Glycine	20	3	C3	4	-0.0620253419582324	0.014113083663137	0.00705654183156848	14.3330162593816
Glycine	20	4	C3	4	-0.0749522271073337	0.0573191972843886	0.0286595986421943	18.9529056221648
Glycine	20	5	C3	4	-0.034268635385468	0.0281199377663301	0.0140599688831651	23.6123253337097
Glycine	20	6	C3	4	-0.0452208900826859	0.0775344082079302	0.0387672041039651	28.2000596629487
Glycine	20	7	C3	4	-0.0947486392483508	0.0571727501375772	0.0285863750687886	32.8928496624273
Glycine	20	8	C3	4	-0.0516164444081293	0.0289946760112122	0.0144973380056061	37.5940413719977
Glycine	20	9	C3	4	-0.0524053437026746	0.0236125983380375	0.0118062991690188	42.3324845344427
Glycine	20	10	C3	4	-0.0423147997954747	0.0465523226774851	0.0232761613387425	47.2624881913002
Glycine	20	11	C3	4	-0.0511761012510644	0.0209575361596295	0.0104787680798147	52.1875109572888
Glycine	20	1	C4	4	-0.474439412122885	0.0309512302054104	0.0154756151027052	5.30929361147503
Glycine	20	2	C4	4	-0.455992037025196	0.0101763172797831	0.00508815863989153	10.660084066258
Glycine	20	3	C4	4	-0.471020870900522	0.0398416842556842	0.0199208421278421	15.9999241330631
Glycine	20	4	C4	4	-0.416255100722717	0.00669110936086241	0.0033455546804312	21.1286555824389
Glycine	20	5	C4	4	-0.418333457986436	0.0201367730391697	0.0100683865195848	26.3113452216908
Glycine	20	6	C4	4	-0.413632281495718	0.0763733234930698	0.0381866617465349	31.3472584047431
Glycine	20	7	C4	4	-0.335162738212843	0.0738660158574425	0.0369330079287213	36.3961432833863
Glycine	20	8	C4	4	-0.308964219128972	0.0480422846208292	0.0240211423104146	41.2644142722298
Glycine	20	9	C4	4	-0.304818088062941	0.0711691105149672	0.0355845552574836	46.1663960025447
Glycine	20	10	C4	4	-0.185680805561497	0.0731457234277867	0.0365728617138933	51.1375549246452
Glycine	20	11	C4	4	-0.105743574767904	0.0298661868415581	0.014933093420779	55.9372564157433
Glycine	20	1	C5	4	0.0256584868377049	0.0229808838252666	0.0114904419126333	4.15444181016992
Glycine	20	2	C5	4	0.00878340070263128	0.0574305905118032	0.0287152952559016	8.41276393991253
Glycine	20	3	C5	4	0.0207320111063665	0.0702555554041183	0.0351277777020591	12.9362329348406
Glycine	20	4	C5	4	0.0311619106386553	0.0520662250047443	0.0260331125023721	17.4287249052498
Glycine	20	5	C5	4	0.0307815141048048	0.0557084579887988	0.0278542289943994	21.9274591418815
Glycine	20	6	C5	4	0.0260601257766917	0.034799089023216	0.017399544511608	26.3329301535899
Glycine	20	7	C5	4	-0.00223164254737063	0.0141465148665948	0.0070732574332974	30.8777782586764
Glycine	20	8	C5	4	0.0366600583224658	0.07240114813061	0.036200574065305	35.5444054098885
Glycine	20	9	C5	4	0.012217889694229	0.0393462544239373	0.0196731272119686	40.1213552412968
Glycine	20	10	C5	4	-0.00657865490090304	0.0297394853789655	0.0148697426894828	44.7206125625103
Glycine	20	11	C5	4	0.0164327453734271	0.0939642242168117	0.0469821121084058	49.4845121326783
Glycine	20	1	C6	4	-0.440282661483534	0.0141431542085345	0.00707157710426723	4.98728829189628
Glycine	20	2	C6	4	-0.47197212741004	0.0647533950932718	0.0323766975466359	10.0569296839766
Glycine	20	3	C6	4	-0.382698706180345	0.0496941041299694	0.0248470520649847	15.0551909696396
Glycine	20	4	C6	4	-0.436522777334663	0.0411381450847454	0.0205690725423727	20.0207597495494
Glycine	20	5	C6	4	-0.399944747958717	0.0487711899893286	0.0243855949946643	24.9022019575403
Glycine	20	6	C6	4	-0.404657737060497	0.0432204669994776	0.0216102334997388	29.709063368099
Glycine	20	7	C6	4	-0.418974713493357	0.0380576125462794	0.0190288062731397	34.663249093835
Glycine	20	8	C6	4	-0.39312801954617	0.0588995030469274	0.0294497515234637	39.3844138207573
Glycine	20	9	C6	4	-0.348082769514067	0.0342976541294676	0.0171488270647338	44.0956090477926
Glycine	20	10	C6	4	-0.413875778098653	0.0383122654526019	0.019156132726301	48.8966397944446
Glycine	20	11	C6	4	-0.421094825980687	0.0491233009725264	0.0245616504862632	53.6540312561953
Glycine	20	1	C7	4	-0.0802214272688652	0.0688826210208241	0.0344413105104121	4.56799779434773
Glycine	20	2	C7	4	0.00902833227277011	0.0257939653581988	0.0128969826790994	8.67836907854925
Glycine	20	3	C7	4	-0.0260988656326708	0.0105602952404469	0.00528014762022343	13.1333132253121
Glycine	20	4	C7	4	0.0112678601677344	0.0100435335299976	0.00502176676499882	17.3301535703026
Glycine	20	5	C7	4	0.0556732865944927	0.0692420351938689	0.0346210175969345	21.5583762946263
Glycine	20	6	C7	4	0.043047010415834	0.0345848367211325	0.0172924183605662	25.6608214228207
Glycine	20	7	C7	4	-0.0124121839787951	0.0474226275111861	0.023711313755593	30.067201571575
Glycine	20	8	C7	4	0.0126914686007396	0.0463584115517154	0.0231792057758577	34.3844454948854
Glycine	20	9	C7	4	0.0578162834703645	0.0832796195578763	0.0416398097789382	38.5483303414905
Glycine	20	10	C7	4	0.0372379941824358	0.0417199163170773	0.0208599581585386	42.9172100274007
Glycine	20	11	C7	4	0.0446161866132433	0.0346928437201009	0.0173464218600504	46.9485152430954
Glycine	20	1	C8	4	-0.418483891815828	0.0322873037045519	0.016143651852276	5.22802504009981
Glycine	20	2	C8	4	-0.447469860668907	0.0267141327049539	0.0133570663524769	10.43165244602
Glycine	20	3	C8	4	-0.450260422860192	0.0746175928083294	0.0373087964041647	15.6736937074613
Glycine	20	4	C8	4	-0.421711382560436	0.0374336418682299	0.018716820934115	20.9096043405657
Glycine	20	5	C8	4	-0.414196177766171	0.0390704794473967	0.0195352397236984	26.109673736472
Glycine	20	6	C8	4	-0.413798844217738	0.042882555006906	0.021441277503453	31.2494351659849
Glycine	20	7	C8	4	-0.426090710057332	0.0162873423314096	0.00814367116570481	36.4239902232615
Glycine	20	8	C8	4	-0.413944667598779	0.0208410755930902	0.0104205377965451	41.648055034116
Glycine	20	9	C8	4	-0.398564758166675	0.0524156821556441	0.0262078410778221	47.1365726974649
Glycine	20	10	C8	4	-0.376459889650947	0.0735074643931667	0.0367537321965834	52.4752148636009
Glycine	20	11	C8	4	-0.299520818746538	0.0986425305520403	0.0493212652760202	57.4997534455507
Glycine	20	1	C9	4	-0.0742282907306141	0.0513209423293799	0.0256604711646899	4.93530993637094
Glycine	20	2	C9	4	0.00514435248112066	0.058175607897901	0.0290878039489505	9.28451471393227
Glycine	20	3	C9	4	-0.0409097375259073	0.0855661913002648	0.0427830956501324	13.742804739511
Glycine	20	4	C9	4	-0.0341145293082844	0.0890481603379064	0.0445240801689532	18.2174884125119
Glycine	20	5	C9	4	-0.0476988037737963	0.0321080278201691	0.0160540139100846	22.6655500524706
Glycine	20	6	C9	4	-0.025828123580567	0.0543194490866335	0.0271597245433168	27.1151153461984
Glycine	20	7	C9	4	0.00110061610241685	0.0739639811834068	0.0369819905917034	31.6116441584686
Glycine	20	8	C9	4	-0.0642858540207003	0.0440201308900876	0.0220100654450438	36.1827089364112
Glycine	20	9	C9	4	-0.0428844611744906	0.0557858463678893	0.0278929231839446	40.6948240398903
Glycine	20	10	C9	4	-0.0720829091232289	0.0399758270379347	0.0199879135189673	45.4242290971189
Glycine	20	11	C9	4	-0.0201001924741833	0.0742297262249479	0.037114863112474	49.9555305707192
Glycine	20	1	D1	4	-0.436893497481315	0.0667760257896729	0.0333880128948365	5.24935052441806
Glycine	20	2	D1	4	-0.399505233816334	0.06706066851837	0.033530334259185	10.6194911982711
Glycine	20	3	D1	4	-0.382964120352957	0.114943565998665	0.0574717829993324	15.9602718819933
Glycine	20	4	D1	4	-0.430635502289608	0.0616097630360394	0.0308048815180197	21.3451975752139
Glycine	20	5	D1	4	-0.454404281498374	0.0584981616944163	0.0292490808472082	26.7233081619834
Glycine	20	6	D1	4	-0.434104105274056	0.0689382584718438	0.0344691292359219	31.9718391116756
Glycine	20	7	D1	4	-0.34773280528504	0.109903529745875	0.0549517648729376	37.0739383973754
Glycine	20	8	D1	4	-0.386051940949282	0.036439728567322	0.018219864283661	42.2383854681575
Glycine	20	9	D1	4	-0.363355902990609	0.0603038469736059	0.0301519234868029	47.4392613262642
Glycine	20	10	D1	4	-0.270287072047145	0.0324206523623989	0.0162103261811994	52.3981832699571
Glycine	20	11	D1	4	-0.255683308120769	0.0477319910267232	0.0238659955133616	57.2475585908215
Glycine	20	1	D10	4	-0.351436852978616	0.0998672434993497	0.0499336217496749	5.30040053136883
Glycine	20	2	D10	4	-0.333682358557859	0.0687375253683777	0.0343687626841888	10.3336642670096
Glycine	20	3	D10	4	-0.322723637830512	0.0503556001816549	0.0251778000908274	15.4065531562103
Glycine	20	4	D10	4	-0.245889654167219	0.0738962623518052	0.0369481311759026	20.3277780184025
Glycine	20	5	D10	4	-0.219996753786429	0.028758099803402	0.014379049901701	25.2273096849933
Glycine	20	6	D10	4	-0.0892739396076967	0.0429194197111587	0.0214597098555794	29.8497644135529
Glycine	20	7	D10	4	-0.0794016727779651	0.0493174446593181	0.0246587223296591	34.3361982667586
Glycine	20	8	D10	4	-0.00265884787776483	0.035204407599053	0.0176022037995265	39.0078394106802
Glycine	20	9	D10	4	-0.023721509960779	0.0491470228238753	0.0245735114119376	43.8322199726501
Glycine	20	10	D10	4	0.0193807582881408	0.0677000292690055	0.0338500146345027	48.3611742942436
Glycine	20	11	D10	4	0.0346293441242911	0.0428721066058924	0.0214360533029462	52.8021454710407
Glycine	20	1	D11	4	-0.319841695217437	0.00770476835140065	0.00385238417570032	5.21269737069408
Glycine	20	2	D11	4	-0.279673476212816	0.0637242533709028	0.0318621266854514	10.1485858514217
Glycine	20	3	D11	4	-0.385023607114894	0.00962869457707013	0.00481434728853506	15.8848991203378
Glycine	20	4	D11	4	-0.293883844669163	0.0695412173896136	0.0347706086948068	20.9106740646645
Glycine	20	5	D11	4	-0.390667987276428	0.0104570685536607	0.00522853427683034	26.7127510392824
Glycine	20	6	D11	4	-0.287398864346166	0.0405636341870205	0.0202818170935103	31.8307191636716
Glycine	20	7	D11	4	-0.312125348439282	0.039165794419985	0.0195828972099925	37.0036254482994
Glycine	20	8	D11	4	-0.292583622625698	0.0455589441562506	0.0227794720781253	42.3335980242337
Glycine	20	9	D11	4	-0.197428082677923	0.0462746907693074	0.0231373453846537	47.4559770551566
Glycine	20	10	D11	4	-0.240615299364815	0.0467618812811426	0.0233809406405713	52.6666252892209
Glycine	20	11	D11	4	-0.171680740481859	0.0117711644820362	0.00588558224101812	57.6713931681231
Glycine	20	1	D12	4	0.0193933404406696	0.0135745604055375	0.00678728020276873	4.5126447305948
Glycine	20	2	D12	4	0.071302805332513	0.0867384040971448	0.0433692020485724	8.86410085052091
Glycine	20	3	D12	4	0.0539963867904041	0.0113883673949841	0.00569418369749207	13.424390707383
Glycine	20	4	D12	4	0.0384224691109911	0.022742437591292	0.011371218795646	17.8116976518855
Glycine	20	5	D12	4	-0.00174703171331403	0.037657108586833	0.0188285542934165	22.3706806436678
Glycine	20	6	D12	4	0.0182359120110112	0.0766075375454342	0.0383037687727171	26.8767232362084
Glycine	20	7	D12	4	0.0477552580778026	0.0441064574656843	0.0220532287328422	31.40097502741
Glycine	20	8	D12	4	0.0287529284180449	0.0270783715025149	0.0135391857512575	35.876298177704
Glycine	20	9	D12	4	-0.00934758117984424	0.0696723654310176	0.0348361827155088	40.5977205956497
Glycine	20	10	D12	4	0.00141992622200549	0.0554255404149658	0.0277127702074829	45.1328438129017
Glycine	20	11	D12	4	0.0107693743281028	0.0172990849700938	0.0086495424850469	49.7452623663014
Glycine	20	1	D2	4	-0.443016076389396	0.0336612582645256	0.0168306291322628	5.53364402894233
Glycine	20	2	D2	4	-0.301560666171034	0.0442201151416503	0.0221100575708251	10.5469148101659
Glycine	20	3	D2	4	-0.329397860758155	0.0724206590419464	0.0362103295209732	15.8196146543768
Glycine	20	4	D2	4	-0.253556424733552	0.0423205205857769	0.0211602602928885	20.8344711250105
Glycine	20	5	D2	4	-0.201377460765485	0.0252224825105008	0.0126112412552504	25.7784954054924
Glycine	20	6	D2	4	-0.174190769507717	0.067930176441	0.0339650882205	30.6582321974724
Glycine	20	7	D2	4	-0.139957705308847	0.0360801514226616	0.0180400757113308	35.4333702851245
Glycine	20	8	D2	4	-0.132266511125775	0.0212669093172666	0.0106334546586333	40.2157942705737
Glycine	20	9	D2	4	-0.120670025817926	0.0119973345653577	0.00599866728267887	45.1158566887084
Glycine	20	10	D2	4	-0.0500126894963447	0.0347490465947793	0.0173745232973897	49.8549799671625
Glycine	20	11	D2	4	-0.0291902377429898	0.0552139812474719	0.027606990623736	54.5718827377862
Glycine	20	1	D3	3	-0.0889657016702089	0.0323504641975989	0.0186775492128931	4.89246575851441
Glycine	20	2	D3	4	-0.0327965618814816	0.0304152417025979	0.015207620851299	9.43342155551677
Glycine	20	3	D3	4	-0.108577959259924	0.0655479592901667	0.0327739796450834	14.1080535500919
Glycine	20	4	D3	4	-0.0540881546559405	0.0411142318398654	0.0205571159199327	18.6616464773958
Glycine	20	5	D3	4	-0.0470999775547847	0.0216041302304752	0.0108020651152376	23.1652356170085
Glycine	20	6	D3	4	-0.0689813142789886	0.0413986535085161	0.020699326754258	27.7359359594817
Glycine	20	7	D3	4	-0.0594959859736082	0.0540298929374844	0.0270149464687422	32.3853479843051
Glycine	20	8	D3	4	-0.0616784910587723	0.037250078071084	0.018625039035542	36.9636195774407
Glycine	20	9	D3	4	-0.0544011220872128	0.0441448775162318	0.0220724387581159	41.672223675953
Glycine	20	10	D3	4	-0.0496921255488378	0.0209949800291413	0.0104974900145706	46.3129897134533
Glycine	20	11	D3	4	-0.0345172422604475	0.070871611704115	0.0354358058520575	51.0361277482606
Glycine	20	1	D4	4	-0.401442243284099	0.0906863870725788	0.0453431935362894	4.9493188520658
Glycine	20	2	D4	4	-0.313828921014224	0.0624056143666832	0.0312028071833416	9.92693376131605
Glycine	20	3	D4	4	-0.292095696910771	0.0356857832099113	0.0178428916049556	14.7789863509536
Glycine	20	4	D4	4	-0.186697383496479	0.0391069054431826	0.0195534527215913	19.4180001527643
Glycine	20	5	D4	4	-0.230874583079158	0.0720822103144183	0.0360411051572091	24.0416392452519
Glycine	20	6	D4	4	-0.0979082567270587	0.02595441938327	0.012977209691635	28.4578212918689
Glycine	20	7	D4	4	-0.0475840123285873	0.0499963134321742	0.0249981567160871	32.9749905663148
Glycine	20	8	D4	4	-0.0746600850183028	0.0513196580851423	0.0256598290425712	37.5024826340312
Glycine	20	9	D4	4	-0.10985863875496	0.0442654620948717	0.0221327310474358	41.9976795432865
Glycine	20	10	D4	4	0.0316772147721432	0.0220417342155701	0.0110208671077851	46.4959814173727
Glycine	20	11	D4	4	-0.0523941336865562	0.0729448185519713	0.0364724092759857	51.0826689480115
Glycine	20	1	D5	4	-0.28096491118432	0.109286114134477	0.0546430570672386	5.14593021582295
Glycine	20	2	D5	4	-0.20402986381966	0.0512561943207934	0.0256280971603967	10.0618183274374
Glycine	20	3	D5	4	-0.211526894011717	0.052165306656215	0.0260826533281075	15.2838437372813
Glycine	20	4	D5	4	-0.116645896146512	0.0453683913602608	0.0226841956801304	20.3782865309136
Glycine	20	5	D5	4	-0.108030616225819	0.0366160846248458	0.0183080423124229	25.4794629266686
Glycine	20	6	D5	4	-0.0573276602539297	0.0171524503129087	0.00857622515645436	30.3329750331469
Glycine	20	7	D5	4	-0.0535014634401539	0.0446264267656247	0.0223132133828124	35.2445577251036
Glycine	20	8	D5	4	-0.0524126522552033	0.0359270830039768	0.0179635415019884	40.4343836700681
Glycine	20	9	D5	4	-0.0536915653527031	0.0492685733484762	0.0246342866742381	45.6227668580898
Glycine	20	10	D5	4	-0.0276381262308187	0.0796296699353762	0.0398148349676881	50.9019919663254
Glycine	20	11	D5	4	-0.0607598752048626	0.121903227369487	0.0609516136847436	56.1662323087919
Glycine	20	1	D6	4	0.0952486636953009	0.098012811061024	0.049006405530512	4.0826241455302
Glycine	20	2	D6	4	0.0939277295955419	0.0391442585387101	0.0195721292693551	8.26528075729548
Glycine	20	3	D6	4	0.00998069476537045	0.0407549379480725	0.0203774689740362	12.912918357576
Glycine	20	4	D6	4	-0.0497755130965641	0.0482309964790853	0.0241154982395426	17.2587380623181
Glycine	20	5	D6	4	-0.0265980232764504	0.0375542356802718	0.0187771178401359	22.0103818127073
Glycine	20	6	D6	4	0.0189625158687263	0.0545901645364352	0.0272950822682176	26.6287303764579
Glycine	20	7	D6	4	0.0252428852513753	0.0341343962199602	0.0170671981099801	31.0923604274041
Glycine	20	8	D6	4	0.0376485415033773	0.0823231109658038	0.0411615554829019	35.7855386742115
Glycine	20	9	D6	3	0.0142115815586837	0.0332570204836973	0.0192009497287075	40.2097200598471
Glycine	20	10	D6	4	0.0307203748893343	0.0521541950333677	0.0260770975166839	44.9560346172449
Glycine	20	11	D6	4	0.0379184910477294	0.0434786832272616	0.0217393416136308	49.3875959881606
Glycine	20	1	D7	4	-0.0831184548393116	0.0793552943292284	0.0396776471646142	4.67986551867858
Glycine	20	2	D7	4	0.0719448429412274	0.112474726115749	0.0562373630578747	8.82198120288406
Glycine	20	3	D7	4	0.0157788251853433	0.0962135847366117	0.0481067923683059	13.1489381842998
Glycine	20	4	D7	4	0.0461619464455389	0.0492830808085781	0.0246415404042891	17.3401394333459
Glycine	20	5	D7	4	-0.00493746951077834	0.106470464753873	0.0532352323769367	21.768839528892
Glycine	20	6	D7	4	0.0168806487767287	0.0658736852638773	0.0329368426319387	26.0081604005839
Glycine	20	7	D7	4	0.0164442432965481	0.0495518547332967	0.0247759273666484	30.4250296709822
Glycine	20	8	D7	4	0.04438897884041	0.0215606448617705	0.0107803224308852	34.759147739747
Glycine	20	9	D7	4	0.046512931187088	0.0835311791477753	0.0417655895738877	39.0810585486399
Glycine	20	10	D7	4	-0.0258243496183606	0.0332906995080308	0.0166453497540154	43.4641059700161
Glycine	20	11	D7	4	0.0628491500903803	0.10529300896659	0.0526465044832948	47.6382833746813
Glycine	20	1	D8	4	0.00712633135875096	0.0669520304803496	0.0334760152401748	4.42230778573464
Glycine	20	2	D8	4	-0.0451715044851934	0.0745991041253408	0.0372995520626704	8.97392404080373
Glycine	20	3	D8	4	-0.00614630060375621	0.118249666402738	0.0591248332013692	13.6128173634731
Glycine	20	4	D8	4	-0.0500463993099297	0.0790532346500272	0.0395266173250136	18.0841333555372
Glycine	20	5	D8	4	-0.0468595893335871	0.0507429059213893	0.0253714529606947	22.5884366961831
Glycine	20	6	D8	4	-0.0339295451822322	0.0992202849255323	0.0496101424627661	27.099443363622
Glycine	20	7	D8	4	-0.0511688841864762	0.0376437759595648	0.0188218879797824	31.6613446191877
Glycine	20	8	D8	4	-0.0860016288679457	0.0253281741030667	0.0126640870515334	36.2884330640805
Glycine	20	9	D8	4	-0.0197904416602391	0.101832352619817	0.0509161763099087	40.8526492819807
Glycine	20	10	D8	4	-0.0247354629280016	0.0841074831665378	0.0420537415832689	45.6920582034132
Glycine	20	11	D8	4	0.00915399522202387	0.0929304969016407	0.0464652484508204	50.1793124805741
Glycine	20	1	D9	4	-0.319687234469531	0.0491580817389002	0.0245790408694501	5.18964573021075
Glycine	20	2	D9	4	-0.347598502524683	0.0365501908460709	0.0182750954230354	10.4367751883196
Glycine	20	3	D9	4	-0.32356426929458	0.0208038983059629	0.0104019491529815	15.6911944277534
Glycine	20	4	D9	4	-0.407386790227316	0.12578709851916	0.0628935492595799	20.5647880371008
Glycine	20	5	D9	4	-0.314881978723586	0.0463586074736171	0.0231793037368085	25.6053350417089
Glycine	20	6	D9	4	-0.320492525221964	0.0544913708352888	0.0272456854176444	30.5729331243131
Glycine	20	7	D9	4	-0.386947749327125	0.043565415199136	0.021782707599568	35.9123033950205
Glycine	20	8	D9	4	-0.379494042315469	0.0836420186108539	0.0418210093054269	40.980518529841
Glycine	20	9	D9	4	-0.323684285734255	0.0334562179137323	0.0167281089568662	46.1132683250954
Glycine	20	10	D9	4	-0.368382997313973	0.0867835978949137	0.0433917989474568	51.2244774293411
Glycine	20	11	D9	4	-0.306070649696479	0.03716161926874	0.01858080963437	56.2969867124018
Glycine	20	1	E1	4	-0.394482604027882	0.0643992178622161	0.032199608931108	5.32783886118052
Glycine	20	2	E1	4	-0.349431117102214	0.0995465331684262	0.0497732665842131	10.5283158952306
Glycine	20	3	E1	4	-0.293325134321766	0.0970065518807037	0.0485032759403518	15.6278861755086
Glycine	20	4	E1	4	-0.359763715740187	0.108883564492423	0.0544417822462115	20.7790417881853
Glycine	20	5	E1	4	-0.315079916984388	0.10129460044241	0.0506473002212051	25.8606184404722
Glycine	20	6	E1	4	-0.280368382863985	0.0653249643193462	0.0326624821596731	30.8508143991655
Glycine	20	7	E1	4	-0.175937150857848	0.0870742133997836	0.0435371066998918	35.6146667897011
Glycine	20	8	E1	4	-0.214632618817395	0.0281743638661128	0.0140871819330564	40.5226070932082
Glycine	20	9	E1	4	-0.145568696993776	0.064588248363432	0.032294124181716	45.3294782910014
Glycine	20	10	E1	4	-0.156769470412752	0.073823865726391	0.0369119328631955	50.3795462902442
Glycine	20	11	E1	4	-0.11444689432092	0.0496270066554744	0.0248135033277372	55.1502814203601
Glycine	20	1	E10	4	-0.313938467527497	0.0206932585903636	0.0103466292951818	5.27930937683409
Glycine	20	2	E10	4	-0.404000657315807	0.0759854554741107	0.0379927277370553	10.5352352221114
Glycine	20	3	E10	4	-0.350641003195869	0.0839065880900043	0.0419532940450022	15.6588321334605
Glycine	20	4	E10	4	-0.411195563107025	0.0642319183300817	0.0321159591650408	21.1018317491152
Glycine	20	5	E10	4	-0.335545947902899	0.0360636831652969	0.0180318415826485	26.3760792693531
Glycine	20	6	E10	4	-0.364338086940592	0.0573690032572505	0.0286845016286252	31.6311152388302
Glycine	20	7	E10	4	-0.394380660803241	0.0617733628674608	0.0308866814337304	36.811208216414
Glycine	20	8	E10	4	-0.376312637532941	0.05248419139194	0.02624209569597	42.0652348535098
Glycine	20	9	E10	4	-0.327356148880602	0.0625378249270671	0.0312689124635336	47.4175761152561
Glycine	20	10	E10	4	-0.335348204046487	0.00375472855060107	0.00187736427530054	52.6787850743872
Glycine	20	11	E10	4	-0.313876510746576	0.00834844540000292	0.00417422270000146	57.8496701674857
Glycine	20	1	E11	4	-0.406042133905882	0.0811574798672348	0.0405787399336174	5.39918927198519
Glycine	20	2	E11	4	-0.336945593681894	0.0364725658386726	0.0182362829193363	10.749108555931
Glycine	20	3	E11	4	-0.32754062693924	0.067560009170279	0.0337800045851395	16.111765963079
Glycine	20	4	E11	4	-0.366808214705534	0.0142791068065298	0.00713955340326491	21.4887847590226
Glycine	20	5	E11	4	-0.407032584761818	0.0941687415018298	0.0470843707509149	26.654722246744
Glycine	20	6	E11	4	-0.345228609548088	0.0631701687805869	0.0315850843902934	31.8355239578701
Glycine	20	7	E11	4	-0.250791758481261	0.0326443490610392	0.0163221745305196	36.9932752274512
Glycine	20	8	E11	4	-0.270565861342746	0.0313954406478912	0.0156977203239456	42.1708871340193
Glycine	20	9	E11	4	-0.240670240402271	0.0691348634641048	0.0345674317320524	47.4118513044352
Glycine	20	10	E11	4	-0.222969726214403	0.0873039924433012	0.0436519962216506	52.4810185684746
Glycine	20	11	E11	4	-0.150749869447042	0.0736525912330988	0.0368262956165494	57.5534003124808
Glycine	20	1	E12	4	-0.274070954659892	0.0927048128601682	0.0463524064300841	5.00197219940939
Glycine	20	2	E12	4	-0.232887448531472	0.0514581324655731	0.0257290662327866	9.89676239480276
Glycine	20	3	E12	4	-0.194264222970775	0.108594944383713	0.0542974721918564	14.896431856458
Glycine	20	4	E12	4	-0.128805511750734	0.0580141621513471	0.0290070810756736	19.6692478459431
Glycine	20	5	E12	4	-0.100993171296351	0.0461677347347532	0.0230838673673766	24.4669172156968
Glycine	20	6	E12	4	-0.0990057263325623	0.0578503949538092	0.0289251974769046	29.2341566420518
Glycine	20	7	E12	4	-0.040513665782567	0.0253416233030669	0.0126708116515335	34.1001185253765
Glycine	20	8	E12	4	0.0108285169102661	0.0565384371460016	0.0282692185730008	38.6879612095052
Glycine	20	9	E12	4	-0.031169011301587	0.0360459723717415	0.0180229861858708	43.299072344449
Glycine	20	10	E12	4	-0.00603163523039862	0.0502908638755041	0.0251454319377521	47.9131179017348
Glycine	20	11	E12	4	-0.0739332610903364	0.042971235105056	0.021485617552528	52.8153342858661
Glycine	20	1	E2	4	-0.071122496175915	0.0126473785144928	0.0063236892572464	4.84617753090937
Glycine	20	2	E2	4	0.0223928179878971	0.0588039994263419	0.029401999713171	9.28371394868421
Glycine	20	3	E2	4	-0.0253558832503626	0.0427415458291811	0.0213707729145906	14.0565433371655
Glycine	20	4	E2	4	-0.00156660441415668	0.0627094223810973	0.0313547111905487	18.6008616498618
Glycine	20	5	E2	4	0.0157124057322577	0.00860180566122275	0.00430090283061138	23.1689789825955
Glycine	20	6	E2	4	0.0128896492763871	0.0364550860425805	0.0182275430212903	27.616863908214
Glycine	20	7	E2	4	-0.00397238695950397	0.0217683507722741	0.010884175386137	32.3363834776244
Glycine	20	8	E2	4	0.00718867636858533	0.0540997652916116	0.0270498826458058	36.9229160731213
Glycine	20	9	E2	4	-0.00678311608831317	0.0242162902635047	0.0121081451317523	41.548378087982
Glycine	20	10	E2	4	0.00828315664973234	0.0139375076950005	0.00696875384750023	46.2311916427386
Glycine	20	11	E2	4	-0.0143131909054787	0.0204559862640609	0.0102279931320304	50.937483792701
Glycine	20	1	E3	4	-0.119377054033826	0.0246947314880174	0.0123473657440087	4.776846253486
Glycine	20	2	E3	4	-0.0644243912296339	0.0364612995539557	0.0182306497769779	9.25389234721959
Glycine	20	3	E3	4	-0.0546321684584198	0.0302285286611527	0.0151142643305763	13.7874781921541
Glycine	20	4	E3	4	-0.100974774490468	0.056315044791046	0.028157522395523	18.2552025169185
Glycine	20	5	E3	4	-0.0268116918910518	0.0552886400737243	0.0276443200368621	22.6027636725109
Glycine	20	6	E3	4	-0.0653309268592748	0.0442317249537449	0.0221158624768724	27.0274280626461
Glycine	20	7	E3	4	-0.078727147453821	0.0675770350545323	0.0337885175272661	31.4835122088459
Glycine	20	8	E3	4	-0.0864421075911486	0.0208847520529312	0.0104423760264656	36.0040533470795
Glycine	20	9	E3	4	-0.0708919307808176	0.0301002606475726	0.0150501303237863	40.4790419281214
Glycine	20	10	E3	4	-0.0185150695184279	0.0551410402860483	0.0275705201430241	45.0973696846509
Glycine	20	11	E3	4	-0.0317455788459536	0.0509592513869375	0.0254796256934688	49.6417572198921
Glycine	20	1	E4	4	-0.241296062570653	0.0447504364541893	0.0223752182270947	5.15828798665094
Glycine	20	2	E4	4	-0.0868434579483236	0.02377686730548	0.01188843365274	9.67232057202923
Glycine	20	3	E4	4	-0.0800494107045499	0.0238609073641053	0.0119304536820527	14.6181392577555
Glycine	20	4	E4	4	-0.00175035623928044	0.0136846758991777	0.00684233794958883	19.1775993418059
Glycine	20	5	E4	4	-0.000914478419434595	0.0271158633839777	0.0135579316919889	23.6492414022523
Glycine	20	6	E4	4	0.0466061162250602	0.0266650390095781	0.0133325195047891	28.0588595431495
Glycine	20	7	E4	4	-0.0294107182420483	0.012582324503178	0.006291162251589	32.5781181927967
Glycine	20	8	E4	4	-0.00813531674765011	0.0643163258630589	0.0321581629315294	37.2827656663132
Glycine	20	9	E4	4	-0.00298669359111925	0.0739309289677704	0.0369654644838852	41.8524493908607
Glycine	20	10	E4	4	-0.00310125088756297	0.025679963630406	0.012839981815203	46.5030274349403
Glycine	20	11	E4	4	0.00304084970555318	0.0267183590877006	0.0133591795438503	51.3139579587842
Glycine	20	1	E5	4	-0.179315442381262	0.0325681651527581	0.0162840825763791	4.66446300756115
Glycine	20	2	E5	4	-0.0287088938024102	0.0607528775469718	0.0303764387734859	8.95241960978675
Glycine	20	3	E5	4	-0.0591085591106699	0.0582006868707948	0.0291003434353974	13.3534395205317
Glycine	20	4	E5	4	0.0587631895060966	0.0575746918096317	0.0287873459048159	17.5255033695599
Glycine	20	5	E5	4	0.0246728927086387	0.0757270254610816	0.0378635127305408	21.5632673268505
Glycine	20	6	E5	4	0.102658537556546	0.0900513220981978	0.0450256610490989	25.6811504181915
Glycine	20	7	E5	4	0.0676738298768325	0.140510397471612	0.0702551987358059	29.9157557332834
Glycine	20	8	E5	4	0.0769797681070039	0.102807707951181	0.0514038539755905	33.9890431064104
Glycine	20	9	E5	4	0.0677288526773646	0.0984205659294088	0.0492102829647044	38.1304161862835
Glycine	20	10	E5	4	0.103807881353979	0.0889756731289875	0.0444878365644937	42.2537413442305
Glycine	20	11	E5	4	0.083046379067514	0.0794117599349593	0.0397058799674797	46.3967839757469
Glycine	20	1	E6	4	-0.275349711556118	0.0385642760850047	0.0192821380425023	4.83188043629312
Glycine	20	2	E6	4	-0.296112012538015	0.0313373133634638	0.0156686566817319	9.59213880784523
Glycine	20	3	E6	4	-0.440739945828403	0.0446224731474736	0.0223112365737368	15.1537042658455
Glycine	20	4	E6	4	-0.409486560204735	0.0265719209734457	0.0132859604867229	20.4102550589807
Glycine	20	5	E6	4	-0.377853233448015	0.0741555999958326	0.0370777999979163	25.658491610899
Glycine	20	6	E6	4	-0.354381569783133	0.0913895984679464	0.0456947992339732	30.7439927129497
Glycine	20	7	E6	4	-0.408691946243511	0.0581838152813069	0.0290919076406534	36.0464712004917
Glycine	20	8	E6	4	-0.403811856625781	0.0622983772029713	0.0311491886014857	41.57572174239
Glycine	20	9	E6	4	-0.443642007300051	0.0458726942201011	0.0229363471100506	46.9347055779001
Glycine	20	10	E6	4	-0.439995121707189	0.0870431502909696	0.0435215751454848	52.8794117285927
Glycine	20	11	E6	4	-0.386773864252854	0.0886905884103032	0.0443452942051516	57.9089657366832
Glycine	20	1	E7	4	0.20307204393552	0.151380608581095	0.0756903042905477	4.17190978231359
Glycine	20	2	E7	4	0.13474186495501	0.063669072552284	0.031834536276142	8.2361660804486
Glycine	20	3	E7	4	0.0984226798168122	0.0831170592463147	0.0415585296231574	12.5584318780143
Glycine	20	4	E7	4	0.0987996215967775	0.142395326738602	0.0711976633693008	16.8899609655531
Glycine	20	5	E7	4	0.138827508672133	0.153523279702807	0.0767616398514035	21.264210856944
Glycine	20	6	E7	4	0.118073939983645	0.0954620123736775	0.0477310061868388	25.464695129303
Glycine	20	7	E7	4	0.0222018537325713	0.0402872954139275	0.0201436477069638	29.7932503795056
Glycine	20	8	E7	4	0.0953900096433185	0.1894177689037	0.0947088844518498	34.2214313016325
Glycine	20	9	E7	4	0.128001814638624	0.123520052492924	0.0617600262464618	38.6392971210518
Glycine	20	10	E7	4	0.130961112309224	0.117743462088703	0.0588717310443513	42.8558709955081
Glycine	20	11	E7	4	0.148748928799667	0.108974182870977	0.0544870914354883	47.0664499289882
Glycine	20	1	E8	4	0.184129192368674	0.124473901584051	0.0622369507920253	4.10288853463632
Glycine	20	2	E8	4	0.203624835488461	0.13255601240992	0.0662780062049598	8.32311458793297
Glycine	20	3	E8	4	0.125442471248329	0.114699388220919	0.0573496941104596	12.9490732553864
Glycine	20	4	E8	4	0.0582685899647731	0.103875730589702	0.0519378652948509	17.165175349937
Glycine	20	5	E8	4	0.0561326769889141	0.0577607092864224	0.0288803546432112	21.7993242038109
Glycine	20	6	E8	4	0.0427339425875298	0.0839254291606899	0.041962714580345	26.517545235556
Glycine	20	7	E8	4	0.0492714381124433	0.179408426066372	0.0897042130331861	31.1207442901247
Glycine	20	8	E8	4	0.0177314619726969	0.0853316383591061	0.0426658191795531	35.7732456948204
Glycine	20	9	E8	4	0.0675995720246024	0.144442145324467	0.0722210726622336	40.3731531903189
Glycine	20	10	E8	4	-0.00203621786390573	0.0605993341046285	0.0302996670523143	45.0222579968317
Glycine	20	11	E8	4	0.0651750560406894	0.121753008877811	0.0608765044389053	49.5799607593964
Glycine	20	1	E9	4	-0.198052970571664	0.0837115179660103	0.0418557589830051	4.6861054086577
Glycine	20	2	E9	4	-0.140433475592268	0.053182583299661	0.0265912916498305	9.19132333704873
Glycine	20	3	E9	2	-0.0577743216096973	0.0641332556466759	0.045349059967335	13.4390577808297
Glycine	20	4	E9	3	-0.0374207780185733	0.0829434422686603	0.0478874187213252	17.8418120209608
Glycine	20	5	E9	4	-0.0914942993600919	0.0628022535276388	0.0314011267638194	22.3084714318805
Glycine	20	6	E9	4	-0.0126584015374618	0.0743865973844703	0.0371932986922352	26.6042565040636
Glycine	20	7	E9	4	-0.0328065688037092	0.102831889468201	0.0514159447341006	30.8992016574371
Glycine	20	8	E9	4	-0.0420520878804298	0.068412079269257	0.0342060396346285	35.3759804399458
Glycine	20	9	E9	4	0.00767364791002889	0.0501591653594756	0.0250795826797378	39.8619768016947
Glycine	20	10	E9	4	0.0408206270633072	0.0387097906590707	0.0193548953295353	44.1547021353416
Glycine	20	11	E9	4	0.0794606162451811	0.0909785012276777	0.0454892506138389	48.4512749251688
Glycine	20	1	F1	4	0.0571225542649798	0.0407548233203466	0.0203774116601733	4.55843083098057
Glycine	20	2	F1	4	0.0856663565783489	0.0436718098165496	0.0218359049082748	9.03420520660329
Glycine	20	3	F1	4	0.115181868730438	0.0509815885684504	0.0254907942842252	13.3671571759064
Glycine	20	4	F1	4	0.0734486951265223	0.0804850086080164	0.0402425043040082	17.8309392440449
Glycine	20	5	F1	4	0.0793717155959954	0.0225884065903052	0.0112942032951526	22.3009236645625
Glycine	20	6	F1	4	0.058292040128638	0.0303393448967098	0.0151696724483549	26.8537750760002
Glycine	20	7	F1	4	0.136887967573068	0.0626296122853219	0.031314806142661	31.1358575276219
Glycine	20	8	F1	4	-0.00578474108087434	0.0215538744607739	0.010776937230387	35.8507562761188
Glycine	20	9	F1	4	0.0393604130822132	0.079362789008935	0.0396813945044675	40.6163383228845
Glycine	20	10	F1	4	0.00162908740321377	0.0335424502046251	0.0167712251023126	45.3708418433748
Glycine	20	11	F1	4	0.0670673789973979	0.0531002659496612	0.0265501329748306	50.0368889701737
Glycine	20	1	F10	4	-0.277909549692177	0.0821936698559362	0.0410968349279681	5.33384691877267
Glycine	20	2	F10	4	-0.272360051283038	0.116931051951646	0.0584655259758229	10.5537383104967
Glycine	20	3	F10	4	-0.249530780640355	0.101328585220161	0.0506642926100804	15.8285506861793
Glycine	20	4	F10	4	-0.226171627592385	0.0882200928734221	0.0441100464367111	20.9271523893772
Glycine	20	5	F10	4	-0.226798863369578	0.0297023586897794	0.0148511793448897	26.0512054133659
Glycine	20	6	F10	4	-0.162219070399817	0.0440627550204706	0.0220313775102353	31.1371118279663
Glycine	20	7	F10	4	-0.22661127781472	0.0624004194256725	0.0312002097128363	36.1285723502409
Glycine	20	8	F10	4	-0.137317412367957	0.0149509127450056	0.00747545637250281	41.1585800128966
Glycine	20	9	F10	4	-0.0761483037140501	0.0581462580743147	0.0290731290371573	45.9969040536012
Glycine	20	10	F10	4	-0.121994713251822	0.0781589381720551	0.0390794690860276	51.1978301144452
Glycine	20	11	F10	4	-0.167117109904832	0.0509099329024646	0.0254549664512323	56.515047339587
Glycine	20	1	F11	4	0.00659416904781696	0.053061232996275	0.0265306164981375	4.88783602758983
Glycine	20	2	F11	4	0.170564332126533	0.106163001524616	0.053081500762308	9.32472988887011
Glycine	20	3	F11	4	0.0336999880406047	0.0612379750538638	0.0306189875269319	14.3235377134788
Glycine	20	4	F11	4	0.107264972955118	0.074817809724706	0.037408904862353	18.9999417203809
Glycine	20	5	F11	4	-0.0115429179277019	0.0478849995383136	0.0239424997691568	23.9140387171792
Glycine	20	6	F11	4	0.0671880064775584	0.0407969206618049	0.0203984603309025	28.6638853386239
Glycine	20	7	F11	4	0.0950836489567765	0.0806131753881717	0.0403065876940858	33.6089679738134
Glycine	20	8	F11	4	-0.0309141919922109	0.0499617555415642	0.0249808777707821	38.7633846204387
Glycine	20	9	F11	4	0.0112577939550403	0.0255157873962144	0.0127578936981072	43.6985634494489
Glycine	20	10	F11	4	-0.0408159123300978	0.0750840031226152	0.0375420015613076	48.9015283200944
Glycine	20	11	F11	4	0.0395296870584496	0.0299785591883087	0.0149892795941543	54.0546316034757
Glycine	20	1	F12	3	-0.0889903345127	0.065249724561377	0.03767194604006	4.61073927382127
Glycine	20	2	F12	4	-0.0940177522320114	0.0726889284238638	0.0363444642119319	9.08327401652904
Glycine	20	3	F12	4	-0.0388339606261504	0.0407024493464271	0.0203512246732135	13.547413822761
Glycine	20	4	F12	4	-0.0512752591430126	0.0592467965030605	0.0296233982515303	18.1488698276585
Glycine	20	5	F12	4	-0.0266067329873066	0.0695298869682998	0.0347649434841499	22.571790117202
Glycine	20	6	F12	4	-0.0706358268503395	0.0753360794748252	0.0376680397374126	27.114632045319
Glycine	20	7	F12	4	0.00837734767594023	0.0405143137347374	0.0202571568673687	31.6055872269333
Glycine	20	8	F12	4	-0.0343162746036557	0.0577046081228614	0.0288523040614307	36.0980953116497
Glycine	20	9	F12	4	-0.0171247041748313	0.0186732496118508	0.00933662480592541	40.6123684081066
Glycine	20	10	F12	4	-0.00836489926981299	0.13107349851458	0.06553674925729	45.1307811500532
Glycine	20	11	F12	4	-0.0425716114553835	0.0707526688783605	0.0353763344391802	49.7062659328331
Glycine	20	1	F2	4	-0.4343070674746	0.0388998227159797	0.0194499113579899	5.28422966169683
Glycine	20	2	F2	4	-0.406355955175091	0.0672336976515411	0.0336168488257706	10.5686297052931
Glycine	20	3	F2	4	-0.391132260099017	0.0273827118980807	0.0136913559490403	15.8441353971785
Glycine	20	4	F2	4	-0.459081995994087	0.0349580546131597	0.0174790273065799	21.1957719830334
Glycine	20	5	F2	4	-0.43179684558838	0.0465144746754068	0.0232572373377034	26.5026822251979
Glycine	20	6	F2	4	-0.451699070274447	0.0488259131244872	0.0244129565622436	31.7922440286524
Glycine	20	7	F2	4	-0.420042349667324	0.0457063942186774	0.0228531971093387	37.1330415298889
Glycine	20	8	F2	4	-0.430376206598202	0.0724653915256202	0.0362326957628101	42.3854520911596
Glycine	20	9	F2	4	-0.404531066574774	0.0939442963979217	0.0469721481989608	47.6249643839467
Glycine	20	10	F2	4	-0.41045595539944	0.015840918415473	0.00792045920773651	52.9137437922218
Glycine	20	11	F2	4	-0.357180982437768	0.0518536125907725	0.0259268062953862	58.070185897836
Glycine	20	1	F3	4	-0.363992351132303	0.0355771204624978	0.0177885602312489	5.57706716035698
Glycine	20	2	F3	4	-0.120655022213009	0.0542347814594448	0.0271173907297224	10.170046843048
Glycine	20	3	F3	4	-0.0399589196660364	0.0797027305150455	0.0398513652575227	14.8363210198563
Glycine	20	4	F3	4	-0.107529911244036	0.057911878582237	0.0289559392911185	19.4535143472138
Glycine	20	5	F3	4	-0.0371189588287895	0.0235003896158349	0.0117501948079174	23.9740656362321
Glycine	20	6	F3	4	-0.0379201656191782	0.0169202643573393	0.00846013217866966	28.3933102410001
Glycine	20	7	F3	4	-0.0592456155216604	0.0354089231114338	0.0177044615557169	32.9754004194705
Glycine	20	8	F3	4	-0.0614872907331502	0.0369862451862982	0.0184931225931491	37.5657849199206
Glycine	20	9	F3	4	-0.0401362766886303	0.0531360818763865	0.0265680409381932	42.0678008626075
Glycine	20	10	F3	4	-0.0281306411103113	0.0487297997152005	0.0243648998576002	46.8357851389571
Glycine	20	11	F3	4	-0.0456795297129512	0.0761377193346784	0.0380688596673392	51.4549818187193
Glycine	20	1	F4	4	-0.0569853283147645	0.0530963205344298	0.0265481602672149	4.66347381389511
Glycine	20	2	F4	4	-0.0696065576521944	0.0395183125322644	0.0197591562661322	9.07117902692386
Glycine	20	3	F4	4	-0.0924311415493753	0.0363382096852117	0.0181691048426058	13.4884654356594
Glycine	20	4	F4	4	-0.0738307615824884	0.0340901323530363	0.0170450661765182	17.9857789655827
Glycine	20	5	F4	4	-0.0377133815217928	0.0530002422782027	0.0265001211391013	22.2935730841767
Glycine	20	6	F4	4	-0.0483135542270577	0.0806147955732065	0.0403073977866032	26.7420771390089
Glycine	20	7	F4	4	-0.0511357713824102	0.0611816359685939	0.030590817984297	31.1918970252494
Glycine	20	8	F4	4	-0.0449828052969911	0.057676130351742	0.028838065175871	35.5886618813482
Glycine	20	9	F4	4	-0.056261756044345	0.0431702465274601	0.02158512326373	40.0360986700492
Glycine	20	10	F4	4	-0.0890746846201455	0.0537472065403928	0.0268736032701964	44.4703204709004
Glycine	20	11	F4	4	-0.0531942410853683	0.0530651232887648	0.0265325616443824	48.8774248878362
Glycine	20	1	F5	4	-0.258760408282876	0.0523157602893359	0.026157880144668	5.00569144350917
Glycine	20	2	F5	4	-0.145310360930674	0.0247546898815742	0.0123773449407871	9.83479427419149
Glycine	20	3	F5	4	-0.0973626206632356	0.0479938454937331	0.0239969227468666	14.8520704385834
Glycine	20	4	F5	4	-0.0901764864366631	0.058448676518145	0.0292243382590725	19.8975285536967
Glycine	20	5	F5	4	-0.0465162374831499	0.055087319857975	0.0275436599289875	24.708257081831
Glycine	20	6	F5	4	-0.02629107674225	0.0111787945193042	0.00558939725965209	29.4570449005973
Glycine	20	7	F5	4	-0.0582959137902158	0.0589658456652474	0.0294829228326237	34.3549126616043
Glycine	20	8	F5	4	-0.0501971509119306	0.0302342732091782	0.0151171366045891	39.2155264171956
Glycine	20	9	F5	4	0.0255491741186081	0.0795037033195878	0.0397518516597939	43.9665512180931
Glycine	20	10	F5	4	-0.0345372008436162	0.0657795670673784	0.0328897835336892	48.9336224482464
Glycine	20	11	F5	4	-0.0334387568339146	0.0369400872148561	0.0184700436074281	53.9249917637421
Glycine	20	1	F6	4	-0.396460796521736	0.048525773367732	0.024262886683866	4.8653605964032
Glycine	20	2	F6	4	-0.305122849659763	0.035862823978999	0.0179314119894995	9.53839124759376
Glycine	20	3	F6	4	-0.263826483676717	0.058657483792031	0.0293287418960155	14.2439142182483
Glycine	20	4	F6	4	-0.244218242315862	0.0407161483617539	0.0203580741808769	18.7479716485586
Glycine	20	5	F6	4	-0.142197690763517	0.0374668618872496	0.0187334309436248	23.1583259888749
Glycine	20	6	F6	4	-0.13866219060213	0.02884261579726	0.01442130789863	27.5402103590692
Glycine	20	7	F6	4	-0.165239330502363	0.0677471114189738	0.0338735557094869	31.9394443022019
Glycine	20	8	F6	4	-0.139196250581689	0.0759861755626947	0.0379930877813473	36.4215484501646
Glycine	20	9	F6	4	-0.0684380792063649	0.0916771069496765	0.0458385534748382	40.6973806307374
Glycine	20	10	F6	4	-0.0695658294846729	0.0256038769026338	0.0128019384513169	45.0566544580061
Glycine	20	11	F6	4	-0.00747961425176935	0.0458373885694403	0.0229186942847201	49.146368154819
Glycine	20	1	F7	4	-0.31305491245593	0.0946334662448407	0.0473167331224204	5.08523762738062
Glycine	20	2	F7	4	-0.423080285883996	0.028316211124253	0.0141581055621265	10.1989167649156
Glycine	20	3	F7	4	-0.394441493061241	0.0243941405686708	0.0121970702843354	15.3434695301639
Glycine	20	4	F7	4	-0.288907733686587	0.123496331787293	0.0617481658936466	20.2608805409926
Glycine	20	5	F7	4	-0.268152997398762	0.0993011068118545	0.0496505534059273	25.3627951162538
Glycine	20	6	F7	4	-0.333996001013221	0.0476903491065128	0.0238451745532564	30.4543968603632
Glycine	20	7	F7	4	-0.37562117882077	0.0446893004201994	0.0223446502100997	35.5762780240708
Glycine	20	8	F7	4	-0.31817284256094	0.0677655631220766	0.0338827815610383	40.7769962094938
Glycine	20	9	F7	4	-0.311045473387173	0.0636646021708974	0.0318323010854487	45.8593115754596
Glycine	20	10	F7	4	-0.317990595096053	0.0777904213343969	0.0388952106671985	51.0108589008273
Glycine	20	11	F7	4	-0.379553577295129	0.0531230278535148	0.0265615139267574	56.1498016017774
Glycine	20	1	F8	4	-0.235019648250482	0.0781987739265665	0.0390993869632833	5.07965572788746
Glycine	20	2	F8	4	-0.25486030398893	0.05448532013673	0.027242660068365	10.1731763857414
Glycine	20	3	F8	4	-0.264317555807316	0.0866350093384737	0.0433175046692369	15.1088667521319
Glycine	20	4	F8	4	-0.224063454434186	0.0791257530814405	0.0395628765407203	20.0615474472202
Glycine	20	5	F8	4	-0.215297281956777	0.097597627148837	0.0487988135744185	25.0118434433963
Glycine	20	6	F8	4	-0.207446592380713	0.121264723743909	0.0606323618719545	30.0668679337525
Glycine	20	7	F8	4	-0.188919811288234	0.102111524330374	0.051055762165187	34.9737941062903
Glycine	20	8	F8	4	-0.201140007842385	0.0927669578222706	0.0463834789111353	40.0217949338314
Glycine	20	9	F8	4	-0.145344208653076	0.035804219514357	0.0179021097571785	44.8158873374597
Glycine	20	10	F8	4	-0.120821868835989	0.0900858526439788	0.0450429263219894	49.8699852239965
Glycine	20	11	F8	4	-0.0423345381580094	0.0612841123699159	0.0306420561849579	54.5619995923019
Glycine	20	1	F9	4	0.161959439623792	0.094926423330208	0.047463211665104	4.43795190095461
Glycine	20	2	F9	4	0.155163696568441	0.138367580211921	0.0691837901059606	8.6345681116774
Glycine	20	3	F9	4	0.118438444091965	0.0392229396595003	0.0196114698297502	13.1221853392775
Glycine	20	4	F9	4	0.127360823306312	0.135196827062944	0.067598413531472	17.3681007456338
Glycine	20	5	F9	4	0.169817847468725	0.145068494429614	0.0725342472148068	21.9321239702586
Glycine	20	6	F9	4	0.129753547686441	0.15971429458049	0.0798571472902448	26.7256606219655
Glycine	20	7	F9	4	0.084820907803675	0.0776671761609415	0.0388335880804707	31.3236819543894
Glycine	20	8	F9	4	0.0619716066648868	0.0500713278578551	0.0250356639289275	36.0292240999545
Glycine	20	9	F9	4	0.17905982312045	0.104924104306542	0.0524620521532711	40.5873526698601
Glycine	20	10	F9	4	0.0472760239076583	0.058658061897244	0.029329030948622	45.1657345573459
Glycine	20	11	F9	4	0.173520569857482	0.132419396693008	0.0662096983465041	49.6792428317129
Glycine	20	1	G1	3	-0.316662387491649	0.0945997949675999	0.0546172170898272	5.25523465095634
Glycine	20	2	G1	4	-0.246870265506708	0.0920505761810862	0.0460252880905431	10.5950513431817
Glycine	20	3	G1	4	-0.212387186305718	0.169204443138475	0.0846022215692373	15.8759223310549
Glycine	20	4	G1	4	-0.331072430817527	0.0959727682078229	0.0479863841039114	21.2448594599499
Glycine	20	5	G1	4	-0.31176484108519	0.0588822212618172	0.0294411106309086	26.57743314679
Glycine	20	6	G1	4	-0.312977444814646	0.101271147966844	0.050635573983422	31.8705721292111
Glycine	20	7	G1	4	-0.250297795710155	0.176141985394931	0.0880709926974654	36.9462715069229
Glycine	20	8	G1	4	-0.332718206636936	0.0651881972395826	0.0325940986197913	42.1765849535256
Glycine	20	9	G1	4	-0.252573871673673	0.0660915581637682	0.0330457790818841	47.3890584197553
Glycine	20	10	G1	4	-0.330206085201201	0.077669997569269	0.0388349987846345	52.6255956047511
Glycine	20	11	G1	4	-0.235438542793081	0.0580747245269837	0.0290373622634919	57.6781890935072
Glycine	20	1	G10	4	-0.271997035274893	0.0664594574336173	0.0332297287168087	5.2435545791685
Glycine	20	2	G10	4	-0.201442015513369	0.106834688840149	0.0534173444200743	10.2523397763307
Glycine	20	3	G10	4	-0.27159261534215	0.0961082996139642	0.0480541498069821	15.4237465451846
Glycine	20	4	G10	4	-0.0931705443528373	0.101849987586273	0.0509249937931365	20.2141169493922
Glycine	20	5	G10	4	-0.132090262965545	0.0413269525130661	0.0206634762565331	25.2615632849589
Glycine	20	6	G10	4	-0.0392445449682843	0.0671110191837682	0.0335555095918841	30.0780553694678
Glycine	20	7	G10	4	0.0234452708413921	0.0853550246455112	0.0426775123227556	34.8163258972566
Glycine	20	8	G10	4	0.017998649742952	0.0882592041931796	0.0441296020965898	39.606097594646
Glycine	20	9	G10	4	0.0420398770294863	0.0672402082264259	0.0336201041132129	44.1661902606449
Glycine	20	10	G10	4	0.10526224936367	0.0673581443686902	0.0336790721843451	48.9350241819546
Glycine	20	11	G10	4	0.0540249210804067	0.102144147844177	0.0510720739220884	53.8168224199914
Glycine	20	1	G11	4	-0.0218856552458249	0.0439507574173647	0.0219753787086824	4.85516011949115
Glycine	20	2	G11	4	0.0428400353714423	0.0815272554325069	0.0407636277162535	9.28782836686133
Glycine	20	3	G11	4	-0.0561339642022509	0.0730587216770774	0.0365293608385387	14.0018717863411
Glycine	20	4	G11	4	0.0606397137158761	0.0838822526929811	0.0419411263464905	18.5631818319996
Glycine	20	5	G11	4	0.00383679292624839	0.080647794748908	0.040323897374454	23.3383460360109
Glycine	20	6	G11	4	0.022920378067781	0.00813572464624324	0.00406786232312162	27.943644151083
Glycine	20	7	G11	4	0.069788958840072	0.0332453001483247	0.0166226500741623	32.553366628696
Glycine	20	8	G11	4	0.0222435668940297	0.0664432316400299	0.0332216158200149	37.220455412723
Glycine	20	9	G11	4	-0.00311815238112423	0.0101744614230101	0.00508723071150507	41.9481454994479
Glycine	20	10	G11	4	0.0120700705057655	0.0854031343682898	0.0427015671841449	46.5788963245163
Glycine	20	11	G11	4	0.123860243609918	0.029344496201667	0.0146722481008335	51.1382853529775
Glycine	20	1	G12	4	-0.105943298006927	0.0920134274158033	0.0460067137079017	4.65121353626971
Glycine	20	2	G12	4	-0.0374963086970255	0.047715609125103	0.0238578045625515	9.24049773483776
Glycine	20	3	G12	4	-0.00347980901562572	0.0572728910416395	0.0286364455208198	13.8039089311584
Glycine	20	4	G12	4	-0.0228547338364531	0.0819572889829984	0.0409786444914992	18.2921502179872
Glycine	20	5	G12	4	-0.0803683920195308	0.0417348519786043	0.0208674259893022	22.8250490479787
Glycine	20	6	G12	4	-0.0297097624538327	0.0222284050513053	0.0111142025256527	27.3790092907555
Glycine	20	7	G12	4	-0.00442021254064873	0.033381804128335	0.0166909020641675	32.0015655044526
Glycine	20	8	G12	4	-0.0398901081896562	0.0432748127912872	0.0216374063956436	36.5569568299645
Glycine	20	9	G12	4	-0.0495577648862128	0.0431361317464999	0.0215680658732499	41.0751814716303
Glycine	20	10	G12	4	-0.0622907388658764	0.0446912731890539	0.022345636594527	45.6790520830872
Glycine	20	11	G12	4	-0.0731981554295039	0.0532704255463468	0.0266352127731734	50.6600674441499
Glycine	20	1	G2	4	-0.340657102881999	0.0261865721965077	0.0130932860982538	5.24623869283526
Glycine	20	2	G2	4	-0.298599782616371	0.0232192767877309	0.0116096383938655	10.3823429511065
Glycine	20	3	G2	4	-0.253883039540608	0.0209774877901035	0.0104887438950517	15.5287797254793
Glycine	20	4	G2	4	-0.29627348952384	0.0584027609479413	0.0292013804739707	20.5440121386121
Glycine	20	5	G2	4	-0.242589979282398	0.0214653273292739	0.0107326636646369	25.5118674491436
Glycine	20	6	G2	4	-0.159448710758775	0.0528579156099287	0.0264289578049643	30.3001413827446
Glycine	20	7	G2	4	-0.0747868010226597	0.0306246886917101	0.015312344345855	35.1499387193139
Glycine	20	8	G2	4	-0.0994238443846206	0.0697058462617371	0.0348529231308685	40.0028420315687
Glycine	20	9	G2	4	-0.0403993315764278	0.0374252892826215	0.0187126446413107	44.828445853611
Glycine	20	10	G2	4	0.0203642578627561	0.040666341702441	0.0203331708512205	49.4330631483412
Glycine	20	11	G2	4	-0.00456148090170505	0.0449276192316688	0.0224638096158344	54.1492468636752
Glycine	20	1	G3	4	-0.335948902612555	0.056347852263344	0.028173926131672	5.27341787527302
Glycine	20	2	G3	4	-0.337498288476021	0.0542740756530519	0.027137037826526	10.6495680296798
Glycine	20	3	G3	4	-0.313345655117577	0.0289326139549329	0.0144663069774664	15.9923420262887
Glycine	20	4	G3	4	-0.347972674635952	0.064493724127081	0.0322468620635405	21.2460821959452
Glycine	20	5	G3	4	-0.347989272438424	0.0290708058639717	0.0145354029319858	26.5739457141147
Glycine	20	6	G3	4	-0.328636997926823	0.0220387510148282	0.0110193755074141	31.8276452593971
Glycine	20	7	G3	4	-0.342689668458258	0.0559726912408623	0.0279863456204312	37.076440560715
Glycine	20	8	G3	4	-0.359311493110311	0.0294817794171838	0.0147408897085919	42.303722041161
Glycine	20	9	G3	4	-0.324055212874099	0.042605654954186	0.021302827477093	47.6389279569666
Glycine	20	10	G3	4	-0.405890275217113	0.0329190350344482	0.0164595175172241	52.9852718523238
Glycine	20	11	G3	4	-0.372470392563726	0.0262306502289545	0.0131153251144773	58.2642189066131
Glycine	20	1	G4	4	-0.172354054360309	0.0970538506392746	0.0485269253196373	4.82611586556736
Glycine	20	2	G4	4	-0.0598333014456053	0.0212804159865119	0.0106402079932559	9.26153780543661
Glycine	20	3	G4	4	0.00259321842266935	0.0134209942468185	0.00671049712340924	13.6752845096547
Glycine	20	4	G4	4	-0.0384017324564071	0.0192029607387952	0.00960148036939758	18.1499085326414
Glycine	20	5	G4	4	-0.00243461575722814	0.0201459176127256	0.0100729588063628	22.540140194926
Glycine	20	6	G4	4	-0.0438488348059175	0.0553168272075714	0.0276584136037857	26.9342806995644
Glycine	20	7	G4	4	-0.0230777798227173	0.0232182068986046	0.0116091034493023	31.4105940212111
Glycine	20	8	G4	4	-0.0147761395492207	0.0424680835262241	0.0212340417631121	35.8852517429164
Glycine	20	9	G4	4	0.0390608649017997	0.027797756946093	0.0138988784730465	40.3126585296687
Glycine	20	10	G4	4	-0.0606648026758975	0.036296938480199	0.0181484692400995	44.8774754664365
Glycine	20	11	G4	4	0.0190369921637054	0.0318476805298895	0.0159238402649447	49.4468920631372
Glycine	20	1	G5	4	0.060469713082828	0.0473380626571465	0.0236690313285732	4.25848457083512
Glycine	20	2	G5	4	0.0897385614043066	0.0134145143577647	0.00670725717888236	8.44385002083536
Glycine	20	3	G5	4	0.0235692703449268	0.0923586500196055	0.0461793250098028	12.8828116331401
Glycine	20	4	G5	4	0.0546625852100107	0.0603436501141775	0.0301718250570887	17.4249937628511
Glycine	20	5	G5	4	0.0576923577949823	0.0360443815783762	0.0180221907891881	21.7573111085208
Glycine	20	6	G5	4	0.0527275020792091	0.0532354269098146	0.0266177134549073	26.1760422533415
Glycine	20	7	G5	4	0.041636469613079	0.0495207968999186	0.0247603984499593	30.5809128915733
Glycine	20	8	G5	4	0.0166673823767921	0.0408344459299175	0.0204172229649587	35.1750178017627
Glycine	20	9	G5	4	-0.000106693898162313	0.0725250285155481	0.0362625142577741	39.6503432329206
Glycine	20	10	G5	4	0.038368703037353	0.0223614203714802	0.0111807101857401	44.2459814047393
Glycine	20	11	G5	4	0.0370249297936631	0.0647794542153869	0.0323897271076935	48.8362213967421
Glycine	20	1	G6	4	-0.335201722417175	0.0262527524400706	0.0131263762200353	5.04774996255413
Glycine	20	2	G6	4	-0.37700969578633	0.019070007697301	0.00953500384865052	10.1469002427567
Glycine	20	3	G6	4	-0.373219908595282	0.0223974202152979	0.011198710107649	15.3175740817045
Glycine	20	4	G6	4	-0.402090789420544	0.055573990097737	0.0277869950488685	20.4761640113468
Glycine	20	5	G6	4	-0.316899354285648	0.098271063109955	0.0491355315549775	25.5238558815195
Glycine	20	6	G6	4	-0.311483768184376	0.0756880838173961	0.037844041908698	30.5767132115292
Glycine	20	7	G6	4	-0.331308694872696	0.0295343269122279	0.014767163456114	35.5826089280363
Glycine	20	8	G6	4	-0.308489435292886	0.043499773880277	0.0217498869401385	40.4682267695099
Glycine	20	9	G6	4	-0.314643573192829	0.0585496754311566	0.0292748377155783	45.4837046608927
Glycine	20	10	G6	4	-0.281400116918878	0.0445242032682199	0.02226210163411	50.3823181820931
Glycine	20	11	G6	4	-0.24818453648377	0.0511442909870653	0.0255721454935327	55.2125727516609
Glycine	20	1	G7	4	-0.22715697617214	0.0146182882754757	0.00730914413773784	4.91561910147234
Glycine	20	2	G7	4	-0.225383071169935	0.085082394471581	0.0425411972357905	9.79177816552097
Glycine	20	3	G7	4	-0.209113290069162	0.0765465939853191	0.0382732969926595	14.5724449213453
Glycine	20	4	G7	4	-0.223538981334453	0.0602651584041829	0.0301325792020915	19.4412148530956
Glycine	20	5	G7	4	-0.140152839182188	0.0367496733273348	0.0183748366636674	24.1251819100994
Glycine	20	6	G7	4	-0.130683419322991	0.0733897182507187	0.0366948591253594	28.7746016884619
Glycine	20	7	G7	4	-0.121798209752939	0.0489819795872307	0.0244909897936153	33.4427573690346
Glycine	20	8	G7	4	-0.0728781776432645	0.087475000043797	0.0437375000218985	38.0094806704865
Glycine	20	9	G7	4	-0.0727105865774934	0.0646344581433209	0.0323172290716605	42.5974092729148
Glycine	20	10	G7	4	-0.0337332861545284	0.0876220790059709	0.0438110395029854	47.3498979192029
Glycine	20	11	G7	4	-0.0382067445800379	0.0615941339652478	0.0307970669826239	51.9157989134215
Glycine	20	1	G8	4	-0.280869587329581	0.0610043941449232	0.0305021970724616	5.31222956172318
Glycine	20	2	G8	4	-0.123312446118121	0.151702395518752	0.075851197759376	9.79496705007949
Glycine	20	3	G8	4	-0.0791637524093752	0.0549275433714223	0.0274637716857112	14.33305674337
Glycine	20	4	G8	4	-0.0162853160078251	0.11322077279039	0.0566103863951952	18.7422231469541
Glycine	20	5	G8	4	-0.0930283409987074	0.086967731485613	0.0434838657428065	23.4348843959219
Glycine	20	6	G8	4	0.0290517400529094	0.0680337745796974	0.0340168872898487	27.9148056059123
Glycine	20	7	G8	4	0.0277809394386836	0.0574540129634952	0.0287270064817476	32.4423332430245
Glycine	20	8	G8	4	0.0396349644831056	0.0565081049862032	0.0282540524931016	37.132605403591
Glycine	20	9	G8	4	-0.00993754008147463	0.0948383177825891	0.0474191588912945	41.8575467359145
Glycine	20	10	G8	4	0.0504657207154618	0.0539915959723155	0.0269957979861577	46.5276697871925
Glycine	20	11	G8	4	0.00202762040605509	0.0949751895179439	0.0474875947589719	51.1732424579323
Glycine	20	1	G9	4	-0.385891024061953	0.105273759946486	0.0526368799732428	5.14082212589645
Glycine	20	2	G9	4	-0.411146651550032	0.092847202165691	0.0464236010828455	10.1462848375221
Glycine	20	3	G9	4	-0.3388900399568	0.132463577370772	0.066231788685386	15.105866549031
Glycine	20	4	G9	4	-0.322265093935058	0.0775886692327882	0.0387943346163941	20.1861262028098
Glycine	20	5	G9	4	-0.279991776775703	0.0672134089191501	0.0336067044595751	25.0893639753051
Glycine	20	6	G9	4	-0.232598928515093	0.0837436596722205	0.0418718298361102	29.8677947218283
Glycine	20	7	G9	4	-0.206692525723742	0.07226492716225	0.036132463581125	34.5830800684305
Glycine	20	8	G9	4	-0.16575046502654	0.0946704349564987	0.0473352174782493	39.4242887306381
Glycine	20	9	G9	4	-0.184223838990117	0.0934793640477743	0.0467396820238872	44.1085275713675
Glycine	20	10	G9	3	-0.0747554924768393	0.125629611086718	0.0725322897791047	48.7057201730098
Glycine	20	11	G9	4	-0.177504425949549	0.0932024062426654	0.0466012031213327	53.4371869043201
Glycine	20	1	H1	4	-0.210172758811422	0.0848826498159852	0.0424413249079926	5.29250447688907
Glycine	20	2	H1	4	-0.153219295917545	0.162554616503444	0.0812773082517222	10.5284245430529
Glycine	20	3	H1	4	0.0497417004970158	0.256529627576862	0.128264813788431	15.4207767819126
Glycine	20	4	H1	4	-0.207053568783478	0.0261127916201527	0.0130563958100764	20.5621675969685
Glycine	20	5	H1	4	-0.186942024352215	0.0699708609456943	0.0349854304728471	25.7495719070758
Glycine	20	6	H1	4	-0.152493700840406	0.0639456714201181	0.0319728357100591	30.867645354175
Glycine	20	7	H1	4	0.0418626938609463	0.107379352933961	0.0536896764669803	35.528105423909
Glycine	20	8	H1	4	-0.0481807900911299	0.0696489410342907	0.0348244705171454	40.5056721002358
Glycine	20	9	H1	4	0.0510966481490558	0.162105102288888	0.0810525511444441	45.195383306088
Glycine	20	10	H1	4	0.0575701458725206	0.0893002364790966	0.0446501182395483	49.9054816733409
Glycine	20	11	H1	4	0.16672603286792	0.121120861978929	0.0605604309894643	54.4079745771835
Glycine	20	1	H10	4	0.0825742613498514	0.0652164141563405	0.0326082070781703	4.29170517712811
Glycine	20	2	H10	4	0.0647353711349676	0.172711787844239	0.0863558939221194	8.53559708889381
Glycine	20	3	H10	4	0.145552607947903	0.194726295201876	0.0973631476009381	12.7900597586047
Glycine	20	4	H10	4	0.0450595097672946	0.0603679740786677	0.0301839870393338	17.1994983023618
Glycine	20	5	H10	4	0.0322801488280666	0.0490865350805562	0.0245432675402781	21.543534569973
Glycine	20	6	H10	4	0.0255257666113302	0.035079429780081	0.0175397148900405	25.9164897857079
Glycine	20	7	H10	4	0.0593391931843023	0.0882242197945446	0.0441121098972723	30.3911993538719
Glycine	20	8	H10	4	0.0777033260466468	0.0249618717271656	0.0124809358635828	34.7939118576423
[truncated: 305 more rows]
