# Supplementary material for: Genetically controlled mtDNA deletions prevent ROS damage by arresting oxidative phosphorylation
Source: eLife. 2022 Jul 8;11:e76095. doi: 10.7554/eLife.76095 (PMC9427111; doi:10.7554/eLife.76095)
Supplement: Figure 2—source data 2. — Data are shown in Figure 2A. [file elife-76095-fig2-data2.xlsx]

## Sheet: Data S18 - EM Mito. # per cell
README: Each row is one cell with mitochondria for each sample, total 100 cells meaning that missing rows = 0 mitochondria
Sample	Number of mitochondria
Before PQ	4
Before PQ	4
Before PQ	5
Before PQ	2
Before PQ	2
Before PQ	5
Before PQ	2
Before PQ	4
Before PQ	3
Before PQ	5
Before PQ	2
Before PQ	5
Before PQ	5
Before PQ	5
Before PQ	3
Before PQ	5
Before PQ	1
Before PQ	1
Before PQ	5
Before PQ	3
Before PQ	5
Before PQ	4
Before PQ	6
Before PQ	5
Before PQ	4
Before PQ	4
Before PQ	3
Before PQ	6
Before PQ	1
Before PQ	3
Before PQ	3
Before PQ	3
Before PQ	4
Before PQ	2
Before PQ	2
Before PQ	1
Before PQ	1
Before PQ	2
Before PQ	5
Before PQ	3
Before PQ	3
Before PQ	4
Before PQ	3
Before PQ	4
Before PQ	3
Before PQ	2
Before PQ	1
Before PQ	3
Before PQ	2
Before PQ	3
Before PQ	4
Before PQ	2
Before PQ	2
Before PQ	7
Before PQ	2
Before PQ	4
Before PQ	2
Before PQ	3
Before PQ	2
Before PQ	2
Before PQ	4
Before PQ	6
Before PQ	2
Before PQ	3
Before PQ	2
Before PQ	5
Before PQ	4
Before PQ	1
Before PQ	4
Before PQ	3
Before PQ	2
Before PQ	1
Before PQ	6
Before PQ	2
Before PQ	1
Before PQ	3
Before PQ	1
Before PQ	8
Before PQ	4
Before PQ	3
Before PQ	2
Before PQ	4
Before PQ	3
Before PQ	1
Before PQ	1
Before PQ	2
Before PQ	2
Before PQ	4
Before PQ	7
Before PQ	1
After 5h PQ	6
After 5h PQ	5
After 5h PQ	6
After 5h PQ	5
After 5h PQ	2
After 5h PQ	3
After 5h PQ	8
After 5h PQ	6
After 5h PQ	4
After 5h PQ	5
After 5h PQ	5
After 5h PQ	8
After 5h PQ	4
After 5h PQ	11
After 5h PQ	3
After 5h PQ	2
After 5h PQ	3
After 5h PQ	5
After 5h PQ	6
After 5h PQ	3
After 5h PQ	2
After 5h PQ	3
After 5h PQ	7
After 5h PQ	6
After 5h PQ	4
After 5h PQ	6
After 5h PQ	5
After 5h PQ	4
After 5h PQ	3
After 5h PQ	4
After 5h PQ	3
After 5h PQ	2
After 5h PQ	2
After 5h PQ	4
After 5h PQ	2
After 5h PQ	2
After 5h PQ	6
After 5h PQ	2
After 5h PQ	8
After 5h PQ	6
After 5h PQ	3
After 5h PQ	6
After 5h PQ	9
After 5h PQ	3
After 5h PQ	4
After 5h PQ	8
After 5h PQ	1
After 5h PQ	4
After 5h PQ	4
After 5h PQ	1
After 5h PQ	7
After 5h PQ	3
After 5h PQ	6
After 5h PQ	6
After 5h PQ	8
After 5h PQ	4
After 5h PQ	9
After 5h PQ	7
After 5h PQ	8
After 5h PQ	5
After 5h PQ	5
After 5h PQ	7
After 5h PQ	11
After 5h PQ	5
After 5h PQ	5
After 5h PQ	10
After 5h PQ	15
After 5h PQ	12
After 5h PQ	3
After 5h PQ	6
After 5h PQ	6
After 5h PQ	1
After 5h PQ	12
After 5h PQ	5
After 5h PQ	3
After 5h PQ	4
After 5h PQ	1
After 5h PQ	6
After 5h PQ	5
After 5h PQ	10
After 5h PQ	9
After 5h PQ	7
After 5h PQ	3
After 5h PQ	1
After 5h PQ	6
After 5h PQ	4
After 5h PQ	5
After 5h PQ	5
After 5h PQ	5
After 5h PQ	3
After 5h PQ	5
After 5h PQ	8
After 5h PQ	5
After 5h PQ	9
After 5h PQ	8
After 5h PQ	10
After 5h PQ	15
After 5h PQ	12
After 5h PQ	17
