# Supplementary material for: Genetically controlled mtDNA deletions prevent ROS damage by arresting oxidative phosphorylation
Source: eLife. 2022 Jul 8;11:e76095. doi: 10.7554/eLife.76095 (PMC9427111; doi:10.7554/eLife.76095)
Supplement: Figure 2—source data 3. — Data are shown in Figure 2B and in Figure 2—figure supplement 1. [file elife-76095-fig2-data3.xlsx]

## Sheet: Data S21 - Confocal quant.
README: Segmented cells from each zstack. Volume ratio sum of mitochondrial volume / cell volume. #mitochondria = number of segmented mitchondria in each cell
Sample	Cell	zstack	Volume ratio	#mitochondria
After 79h PQ stress	1	1	0.0612731084429198	3
After 79h PQ stress	2	1	0	0
After 79h PQ stress	4	1	0.138364167478092	7
After 79h PQ stress	5	1	0.136855167523489	3
After 79h PQ stress	6	1	0.0606612971598135	7
After 79h PQ stress	7	1	0.0264237855946399	4
After 79h PQ stress	8	1	0.05066200809121	6
After 79h PQ stress	9	1	0	0
After 79h PQ stress	10	1	0.0512742162195196	7
After 79h PQ stress	12	1	0.0666009574767671	5
After 79h PQ stress	13	1	0.00973248949635696	3
After 79h PQ stress	14	1	0.0669438535421904	9
After 79h PQ stress	15	1	0.128249036756162	3
After 79h PQ stress	16	1	0.0984171322160149	3
After 79h PQ stress	17	1	0.0706410510332079	3
After 79h PQ stress	18	1	0.0520408163265306	6
After 79h PQ stress	19	1	0.0117177883905273	3
After 79h PQ stress	20	1	0.0330655391120507	4
After 79h PQ stress	21	1	0.0792512404149752	3
After 79h PQ stress	22	1	0.0529253669629936	27
After 79h PQ stress	23	1	0.08960037391914	6
After 79h PQ stress	24	1	0.116194331983806	4
After 79h PQ stress	25	1	0.0975705110304384	3
After 79h PQ stress	26	1	0.0264371349523517	8
After 79h PQ stress	27	1	0.0513476993101486	4
After 79h PQ stress	28	1	0.0369525051624823	4
After 79h PQ stress	29	1	0.0654532899279866	4
After 79h PQ stress	30	1	0.0600196926238281	7
After 79h PQ stress	31	1	0.083547557840617	3
After 79h PQ stress	32	1	0.173481642456823	12
After 79h PQ stress	33	1	0.0487065230845402	5
After 79h PQ stress	34	1	0.0653526970954357	7
After 79h PQ stress	35	1	0.103054662379421	2
After 79h PQ stress	36	1	0	0
After 79h PQ stress	37	1	0.0527760704773612	7
After 79h PQ stress	38	1	0.0352385565512231	6
After 79h PQ stress	39	1	0.0967328635490071	4
After 79h PQ stress	40	1	0.141301272984441	3
After 79h PQ stress	41	1	0.0173226238286479	7
After 79h PQ stress	42	1	0.126729559748428	2
After 79h PQ stress	43	1	0.0320504400367792	11
After 79h PQ stress	44	1	0.0516828840325411	5
After 79h PQ stress	45	1	0.041655444833468	10
After 79h PQ stress	46	1	0.0796979410007062	5
After 79h PQ stress	47	1	0.13272921108742	2
After 79h PQ stress	48	1	0.117773595052433	8
After 79h PQ stress	49	1	0.0805373658273138	3
After 79h PQ stress	50	1	0.0443638066253073	4
After 79h PQ stress	51	1	0.0693333333333333	2
After 79h PQ stress	52	1	0.161244813278008	3
After 79h PQ stress	53	1	0.045888	4
After 79h PQ stress	54	1	0.107028360049322	1
After 79h PQ stress	55	1	0.0886223031749521	8
After 79h PQ stress	56	1	0.102690582959641	4
After 79h PQ stress	57	1	0.0160933852140078	4
After 79h PQ stress	58	1	0.0486937626549459	5
After 79h PQ stress	59	1	0.0739935500235533	7
After 79h PQ stress	60	1	0.0632189864234636	6
After 79h PQ stress	61	1	0.0580591071054286	3
After 79h PQ stress	62	1	0.0312354745746955	5
After 79h PQ stress	63	1	0.166496250852079	8
After 79h PQ stress	64	1	0.125975609756098	1
After 79h PQ stress	65	1	0.079032719641324	3
After 79h PQ stress	66	1	0.117603983596954	2
After 79h PQ stress	67	1	0.148129313476208	3
After 79h PQ stress	68	1	0.031562693020383	4
After 79h PQ stress	69	1	0.0838753571914546	10
After 79h PQ stress	70	1	0.0797728607793225	9
After 79h PQ stress	71	1	0.0771469442115128	6
After 79h PQ stress	72	1	0.0234613795952086	3
After 79h PQ stress	1	2	0.00139456121127602	1
After 79h PQ stress	2	2	0.148216409036861	4
After 79h PQ stress	3	2	0.147315096251266	6
After 79h PQ stress	4	2	0.0936469185038857	12
After 79h PQ stress	5	2	0.134098115358581	8
After 79h PQ stress	6	2	0.0986316800848159	13
After 79h PQ stress	7	2	0.0544268406337372	8
After 79h PQ stress	8	2	0.0619962532130876	7
After 79h PQ stress	9	2	0.0552934944378579	15
After 79h PQ stress	10	2	0.00523914145681933	2
After 79h PQ stress	11	2	0.0773816803228568	7
After 79h PQ stress	12	2	0.134317343173432	2
After 79h PQ stress	13	2	0.00130478164095479	1
After 79h PQ stress	14	2	0.105456349206349	1
After 79h PQ stress	15	2	0.175785090509514	5
After 79h PQ stress	16	2	0.11444261394838	3
After 79h PQ stress	17	2	0.133847902830132	3
After 79h PQ stress	19	2	0.060738171909834	2
After 79h PQ stress	20	2	0.103785591665187	16
After 79h PQ stress	21	2	0.106113033448674	1
After 79h PQ stress	22	2	0.127421104281804	2
After 79h PQ stress	23	2	0.123309053069719	6
After 79h PQ stress	24	2	0.124076570504179	5
After 79h PQ stress	25	2	0.0993088026021549	6
After 79h PQ stress	26	2	0.105420054200542	6
After 79h PQ stress	27	2	0.157601115760112	2
After 79h PQ stress	28	2	0.150186212662461	4
After 79h PQ stress	29	2	0.123766105054509	4
After 79h PQ stress	30	2	0.128049408131755	5
After 79h PQ stress	31	2	0.205173951828724	1
After 79h PQ stress	32	2	0.123085176133993	5
After 79h PQ stress	33	2	0.113116315416738	21
After 79h PQ stress	34	2	0.0592531292024413	20
After 79h PQ stress	35	2	0.0471475572661245	11
After 79h PQ stress	36	2	0.195373267127809	7
After 79h PQ stress	37	2	0.156167834369834	7
After 79h PQ stress	38	2	0.133245778611632	8
After 79h PQ stress	39	2	0.168940609951846	3
After 79h PQ stress	40	2	0.175495180997192	3
After 79h PQ stress	41	2	0.143538440454981	11
After 79h PQ stress	42	2	0.210190636389122	1
After 79h PQ stress	44	2	0.20502520478891	4
After 79h PQ stress	45	2	0.171661905018597	5
After 79h PQ stress	46	2	0.102093227792436	7
After 79h PQ stress	47	2	0.121073672187322	7
After 79h PQ stress	48	2	0.0884394808330818	8
After 79h PQ stress	49	2	0.117252838548878	6
After 79h PQ stress	50	2	0	0
After 79h PQ stress	51	2	0	0
After 79h PQ stress	52	2	0	0
After 79h PQ stress	53	2	0.00312777985021091	2
After 79h PQ stress	54	2	0	0
After 79h PQ stress	55	2	0.0123700960120824	4
After 79h PQ stress	56	2	0.0205798215276888	6
After 79h PQ stress	57	2	0.134169884169884	5
After 79h PQ stress	58	2	0	0
After 79h PQ stress	59	2	0.0878125	7
After 79h PQ stress	60	2	0.0837362520588704	5
After 79h PQ stress	1	3	0.180294025649046	1
After 79h PQ stress	2	3	0.21747483989021	1
After 79h PQ stress	3	3	0.183318792531844	1
After 79h PQ stress	4	3	0.112858192505511	1
After 79h PQ stress	5	3	0.120297643654403	2
After 79h PQ stress	6	3	0.206269848756407	1
After 79h PQ stress	7	3	0.107472673172687	4
After 79h PQ stress	8	3	0.117056170561706	2
After 79h PQ stress	9	3	0.117518202490977	4
After 79h PQ stress	10	3	0.135924669914445	3
After 79h PQ stress	11	3	0.14037985136251	1
After 79h PQ stress	12	3	0.135297280470895	3
After 79h PQ stress	13	3	0.188898094449047	3
After 79h PQ stress	14	3	0.124519966015293	4
After 79h PQ stress	15	3	0.115612348178138	3
After 79h PQ stress	16	3	0.0898250649173158	12
After 79h PQ stress	17	3	0.147827974102073	4
After 79h PQ stress	20	3	0.170122176971492	4
After 79h PQ stress	21	3	0.0726198684382163	9
After 79h PQ stress	22	3	0.152607003891051	2
After 79h PQ stress	23	3	0.2	2
After 79h PQ stress	24	3	0.128796728971963	2
After 79h PQ stress	25	3	0.186517978809199	4
After 79h PQ stress	1	4	0.134133611691023	3
After 79h PQ stress	2	4	0.0517328504653219	3
After 79h PQ stress	3	4	0.0591463414634146	1
After 79h PQ stress	4	4	0.0641834506187818	6
After 79h PQ stress	5	4	0.101561134007743	5
After 79h PQ stress	6	4	0.0554253966128924	4
After 79h PQ stress	7	4	0.0224219276567064	5
After 79h PQ stress	8	4	0.00423091387739752	1
After 79h PQ stress	9	4	0.0426506024096386	6
After 79h PQ stress	10	4	0.0618522028923472	8
After 79h PQ stress	11	4	0.0514076782449726	10
After 79h PQ stress	12	4	0.0357051282051282	4
After 79h PQ stress	13	4	0.0590198632367307	12
After 79h PQ stress	14	4	0.085167501261597	4
After 79h PQ stress	15	4	0.151842368919069	2
After 79h PQ stress	16	4	0.0694477284242527	2
After 79h PQ stress	17	4	0.0807007036981584	5
After 79h PQ stress	18	4	0.0741239194575288	4
After 79h PQ stress	19	4	0.0780966767371601	2
After 79h PQ stress	20	4	0.0246489859594384	2
After 79h PQ stress	21	4	0.0350263709269562	12
After 79h PQ stress	22	4	0.0980030048829348	8
After 79h PQ stress	23	4	0.00221762826536365	1
After 79h PQ stress	24	4	0.0635209777882242	4
After 79h PQ stress	25	4	0.117092622802248	3
After 79h PQ stress	26	4	0.0122678671918965	1
After 79h PQ stress	27	4	0.00832708801732034	2
After 79h PQ stress	28	4	0.0672727272727273	5
After 79h PQ stress	29	4	0.0821644765982578	3
After 79h PQ stress	30	4	0.0490287556196454	9
After 79h PQ stress	31	4	0.0686585539088025	5
After 79h PQ stress	32	4	0.0893120846665026	5
After 79h PQ stress	33	4	0.0449855072463768	6
After 79h PQ stress	34	4	0.0977951782402638	3
After 79h PQ stress	35	4	0.0437844272714433	8
After 79h PQ stress	36	4	0.0671334036635658	3
After 79h PQ stress	37	4	0.0751368197020371	3
After 79h PQ stress	38	4	0.0201016338608002	5
After 79h PQ stress	1	5	0.0254372019077901	4
After 79h PQ stress	2	5	0.0251070205479452	8
After 79h PQ stress	3	5	0.135109801821103	3
After 79h PQ stress	4	5	0.01804745235317	9
After 79h PQ stress	5	5	0.1713298791019	2
After 79h PQ stress	6	5	0.00452082365691284	3
After 79h PQ stress	7	5	0.059169855755078	9
After 79h PQ stress	8	5	0.0675315147068632	4
After 79h PQ stress	9	5	0.0182575081772227	3
After 79h PQ stress	10	5	0.0763988522238164	4
After 79h PQ stress	11	5	0.083416861565876	4
After 79h PQ stress	12	5	0.0399336949969861	5
After 79h PQ stress	13	5	0.0368067820558107	4
After 79h PQ stress	14	5	0.0884184023804074	12
After 79h PQ stress	15	5	0.198952651101898	1
After 79h PQ stress	16	5	0.156636383780191	3
After 79h PQ stress	17	5	0.0705306673416013	3
After 79h PQ stress	18	5	0.0525531121878494	7
After 79h PQ stress	19	5	0	0
After 79h PQ stress	20	5	0.00112558985237456	1
After 79h PQ stress	21	5	0.0377766829714607	8
After 79h PQ stress	22	5	0.103575757575758	1
After 79h PQ stress	23	5	0.0641429179072735	5
After 79h PQ stress	24	5	0.0572194010156344	10
After 79h PQ stress	25	5	0.169104262130437	5
After 79h PQ stress	26	5	0.00218739545536427	2
After 79h PQ stress	27	5	0.138805384917004	3
After 79h PQ stress	28	5	0.134851206748418	5
After 79h PQ stress	29	5	0.0980549750843916	6
After 79h PQ stress	30	5	0.00918484500574053	3
After 79h PQ stress	31	5	0.114828209764919	5
After 79h PQ stress	32	5	0.131331904387226	3
After 79h PQ stress	33	5	0.141756813108642	2
After 79h PQ stress	34	5	0.180115476693423	1
After 79h PQ stress	35	5	0.197412935323383	1
After 79h PQ stress	36	5	0.000820905732658366	1
After 79h PQ stress	37	5	0	0
After 79h PQ stress	38	5	0.103888888888889	5
After 79h PQ stress	39	5	0.149557355434168	4
After 79h PQ stress	40	5	0.0440950920245399	4
After 79h PQ stress	41	5	0.0214965068176421	14
After 79h PQ stress	42	5	0.136116910229645	2
After 79h PQ stress	43	5	0.0695106649937265	3
After 79h PQ stress	45	5	0.0136520958851429	2
After 79h PQ stress	46	5	0.0544890510948905	4
After 79h PQ stress	47	5	0.0379819133745835	4
After 79h PQ stress	48	5	0.0453321364452424	2
After 79h PQ stress	49	5	0.0271779997851542	2
After 79h PQ stress	50	5	0.00946488294314381	6
After 79h PQ stress	51	5	0.0875319366377108	7
After 79h PQ stress	52	5	0.110159178308913	4
After 79h PQ stress	53	5	0	0
After 79h PQ stress	54	5	0.00351235711092662	2
After 79h PQ stress	55	5	0.0907039990110637	9
After 79h PQ stress	56	5	0.0307045215562566	4
After 79h PQ stress	57	5	0.124284430146189	6
After 79h PQ stress	58	5	0.0167909238249595	3
After 79h PQ stress	59	5	0.111696254140831	5
After 79h PQ stress	60	5	0.101824948581502	9
After 79h PQ stress	61	5	0.0785522260835355	2
After 79h PQ stress	62	5	0.170690623245368	4
After 79h PQ stress	63	5	0.20363536968703	3
After 79h PQ stress	64	5	0	0
After 79h PQ stress	65	5	0.152396598376498	4
After 79h PQ stress	66	5	0.183924904664124	1
After 79h PQ stress	67	5	0.129363449691992	4
After 79h PQ stress	68	5	0.199155524278677	3
After 79h PQ stress	69	5	0.196913178878204	2
After 79h PQ stress	70	5	0.150062396006656	4
After 79h PQ stress	71	5	0	0
After 79h PQ stress	72	5	0.0448043660050174	7
After 79h PQ stress	73	5	0.106022501654533	11
After 79h PQ stress	74	5	0.150532570103616	4
After 79h PQ stress	75	5	0.0913024184601731	3
After 79h PQ stress	76	5	0	0
After 79h PQ stress	77	5	0	0
After 79h PQ stress	79	5	0.0150513868935794	10
After 79h PQ stress	80	5	0.152450567942785	3
After 79h PQ stress	81	5	0.00281413168780091	1
After 79h PQ stress	82	5	0.0254057868736768	3
After 79h PQ stress	83	5	0.118996328029376	7
After 79h PQ stress	84	5	0.0446322689148106	4
After 79h PQ stress	85	5	0.114754816112084	3
After 79h PQ stress	86	5	0.0331121101834011	3
After 79h PQ stress	87	5	0.171118530884808	4
After 79h PQ stress	88	5	0.130167406901264	6
After 79h PQ stress	89	5	0	0
After 79h PQ stress	90	5	0.140038498556304	4
After 79h PQ stress	91	5	0.0061951275132074	2
After 79h PQ stress	92	5	0.132509328358209	2
After 79h PQ stress	1	6	0.116699155295647	4
After 79h PQ stress	2	6	0.0630971128608924	12
After 79h PQ stress	3	6	0	0
After 79h PQ stress	4	6	0.0280208569485377	9
After 79h PQ stress	5	6	0.0237756161143161	6
After 79h PQ stress	6	6	0.0443078396934377	4
After 79h PQ stress	7	6	0.0423065778035352	2
After 79h PQ stress	8	6	0.0585329738330976	15
After 79h PQ stress	9	6	0.0554545878186309	8
After 79h PQ stress	10	6	0.0721784776902887	4
After 79h PQ stress	11	6	0.14284964300714	5
After 79h PQ stress	12	6	0.00513728963684677	1
After 79h PQ stress	13	6	0.138647058823529	1
After 79h PQ stress	14	6	0.0591887417218543	5
After 79h PQ stress	15	6	0.112235235484675	4
After 79h PQ stress	16	6	0.0232205956587582	6
After 79h PQ stress	17	6	0.0564913486879798	9
After 79h PQ stress	18	6	0.0704886704886705	5
After 79h PQ stress	19	6	0.0530279259491685	5
After 79h PQ stress	20	6	0.0148538224078446	7
After 79h PQ stress	21	6	0.0541418728468525	7
After 79h PQ stress	22	6	0.0373879641485275	8
After 79h PQ stress	23	6	0.0407146215326751	3
After 79h PQ stress	24	6	0.0676361790092116	6
After 79h PQ stress	25	6	0.0526418659196039	7
After 79h PQ stress	26	6	0.137340885559413	3
After 79h PQ stress	27	6	0.0428171641791045	3
After 79h PQ stress	28	6	0.0522241992882562	4
After 79h PQ stress	29	6	0.020808405078068	8
After 79h PQ stress	30	6	0.210853602569986	2
After 79h PQ stress	31	6	0.101898602128103	5
After 79h PQ stress	32	6	0.0889217134416543	5
After 79h PQ stress	33	6	0.0407126733311835	4
After 79h PQ stress	34	6	0.0329001584786054	3
After 79h PQ stress	35	6	0.100096061479347	5
After 79h PQ stress	36	6	0.0474939311723547	6
After 79h PQ stress	37	6	0.094851448606754	9
After 79h PQ stress	38	6	0.00578806767586821	1
After 79h PQ stress	39	6	0.051062016919238	4
After 79h PQ stress	40	6	0.0432830459770115	1
After 79h PQ stress	41	6	0.0973871733966746	4
After 79h PQ stress	42	6	0.0523803587012663	19
After 79h PQ stress	43	6	0.00490828589500316	3
After 79h PQ stress	44	6	0.134731241686879	3
After 79h PQ stress	45	6	0.0796465390279823	10
After 79h PQ stress	46	6	0.0150796161552251	7
After 79h PQ stress	47	6	0.11661674511482	10
After 79h PQ stress	48	6	0	0
After 79h PQ stress	49	6	0.0434896204455845	15
After 79h PQ stress	50	6	0.106181612375802	5
After 79h PQ stress	51	6	0.0896335888599761	11
After 79h PQ stress	52	6	0	0
After 79h PQ stress	53	6	0.080462300495322	3
After 79h PQ stress	54	6	0.0815287592128258	4
After 79h PQ stress	55	6	0.0377055873089934	5
After 79h PQ stress	56	6	0.055008685581934	15
After 79h PQ stress	57	6	0.141956345998383	4
After 79h PQ stress	58	6	0	0
After 79h PQ stress	59	6	0.0162472671153599	5
After 79h PQ stress	60	6	0.0745364801526401	12
After 79h PQ stress	61	6	0.0620003976933784	4
After 79h PQ stress	62	6	0.0369288904156647	6
After 79h PQ stress	63	6	0.0939601614039582	5
After 79h PQ stress	1	7	0	0
After 79h PQ stress	2	7	0.0768599281682914	2
After 79h PQ stress	3	7	0.0315366128794938	6
After 79h PQ stress	4	7	0.0284799600864793	8
After 79h PQ stress	5	7	0.00399911130859809	1
After 79h PQ stress	6	7	0.0988869361452841	4
After 79h PQ stress	7	7	0.0239530649403196	3
After 79h PQ stress	8	7	0.014274018438757	4
After 79h PQ stress	9	7	0.0957742849780984	9
After 79h PQ stress	10	7	0.058796378483934	5
After 79h PQ stress	11	7	0.042452530640757	12
After 79h PQ stress	12	7	0.00167865707434053	1
After 79h PQ stress	13	7	0.0897944593386953	6
After 79h PQ stress	14	7	0.0638509604258274	8
After 79h PQ stress	15	7	0.0487431106331496	13
After 79h PQ stress	16	7	0.0781174726700019	5
After 79h PQ stress	17	7	0.0269018743109151	6
After 79h PQ stress	18	7	0.114759427828348	2
After 79h PQ stress	19	7	0.143683126204559	10
After 79h PQ stress	20	7	0.0909273182957394	3
After 79h PQ stress	21	7	0.147963539228376	4
After 79h PQ stress	22	7	0.0357349882360964	10
After 79h PQ stress	23	7	0.0552556735736259	12
After 79h PQ stress	24	7	0.0998886414253898	3
After 79h PQ stress	25	7	0.244778349182636	1
After 79h PQ stress	26	7	0.137986198243413	4
After 79h PQ stress	27	7	0.0449288256227758	4
After 79h PQ stress	28	7	0.073006808697562	8
After 79h PQ stress	29	7	0.0149636098981077	8
After 79h PQ stress	30	7	0.129647122326429	7
After 79h PQ stress	31	7	0.020294719177723	5
After 79h PQ stress	32	7	0.127560321715818	2
After 79h PQ stress	33	7	0.0709946331762334	15
After 79h PQ stress	34	7	0.020932377776201	4
After 79h PQ stress	35	7	0.0140386061669591	5
After 79h PQ stress	36	7	0.0184423676012461	4
After 79h PQ stress	1	8	0.0311954691565896	7
After 79h PQ stress	2	8	0.0956213779781069	3
After 79h PQ stress	3	8	0.0220933443800055	1
After 79h PQ stress	4	8	0.079192334017796	5
After 79h PQ stress	5	8	0.0615384615384615	3
After 79h PQ stress	6	8	0.0269543258673693	2
After 79h PQ stress	7	8	0.0344212136664967	5
After 79h PQ stress	8	8	0.0584188292094146	1
After 79h PQ stress	9	8	0.0412711514651259	3
After 79h PQ stress	10	8	0.0685	1
After 79h PQ stress	11	8	0.114771603717619	5
After 79h PQ stress	12	8	0.0777632153778943	4
After 79h PQ stress	13	8	0.050608192362892	9
After 79h PQ stress	14	8	0.0749825052484255	7
After 79h PQ stress	15	8	0.0717927843002828	6
After 79h PQ stress	16	8	0.0622043592518163	4
After 79h PQ stress	17	8	0.082062298603652	2
After 79h PQ stress	18	8	0.11402489626556	1
After 79h PQ stress	19	8	0.0586816499931479	8
After 79h PQ stress	20	8	0.0685930060745362	3
After 79h PQ stress	21	8	0.0848442665738646	8
After 79h PQ stress	22	8	0.048895457995446	5
After 79h PQ stress	23	8	0.0797971368042627	5
After 79h PQ stress	1	9	0.146331791143424	2
After 79h PQ stress	2	9	0.00396600566572238	1
After 79h PQ stress	3	9	0.00577118471855314	2
After 79h PQ stress	4	9	0.00428232380559282	1
After 79h PQ stress	5	9	0.0532661570535094	7
After 79h PQ stress	6	9	0.0354746152569301	11
After 79h PQ stress	7	9	0.0209807195992106	4
After 79h PQ stress	8	9	0.0637747773628268	5
After 79h PQ stress	9	9	0.00340136054421769	1
After 79h PQ stress	10	9	0.0022834258413546	2
After 79h PQ stress	11	9	0.0147736976942784	4
After 79h PQ stress	12	9	0.0512282294207749	2
After 79h PQ stress	13	9	0.0531865965834428	4
After 79h PQ stress	14	9	0.0850013561160835	2
After 79h PQ stress	15	9	0.0739954868478664	8
After 79h PQ stress	16	9	0.0321985729834321	10
After 79h PQ stress	17	9	0.121071687183201	3
After 79h PQ stress	18	9	0.0376558806748716	4
After 79h PQ stress	19	9	0.0872226472838561	7
After 79h PQ stress	20	9	0.0142270861833105	6
After 79h PQ stress	21	9	0.0385447394296952	2
After 79h PQ stress	22	9	0.0164952737093591	7
After 79h PQ stress	23	9	0.0113197566781275	2
After 79h PQ stress	24	9	0.0237683423534007	4
After 79h PQ stress	25	9	0.00274990709773318	3
After 79h PQ stress	26	9	0.0336609578909306	10
After 79h PQ stress	27	9	0	0
After 79h PQ stress	28	9	0.0701954397394137	4
After 79h PQ stress	29	9	0.0189945963648272	4
After 79h PQ stress	30	9	0.0558588295036181	9
After 79h PQ stress	31	9	0.00357584926420025	1
After 79h PQ stress	32	9	0.00245359505013868	1
After 79h PQ stress	33	9	0.00264631043256997	1
After 79h PQ stress	34	9	0.0135953413915505	6
After 79h PQ stress	35	9	0.048059807760769	3
After 79h PQ stress	36	9	0.00917604410543011	3
After 79h PQ stress	37	9	0	0
After 79h PQ stress	38	9	0.00790461470523294	2
After 79h PQ stress	39	9	0.0092248132353386	4
After 79h PQ stress	40	9	0.0159173754556501	1
After 79h PQ stress	41	9	0.0430289634583919	8
After 79h PQ stress	42	9	0.0632685795758332	2
After 79h PQ stress	43	9	0.0128313725490196	3
After 79h PQ stress	44	9	0.105936703483432	8
After 79h PQ stress	45	9	0	0
After 79h PQ stress	46	9	0.0650144927536232	8
After 79h PQ stress	47	9	0.0296523674315095	7
After 79h PQ stress	48	9	0.0615367051033223	7
After 79h PQ stress	49	9	0.0759338842975207	12
After 79h PQ stress	50	9	0.0543398851974256	5
After 79h PQ stress	51	9	0	0
After 79h PQ stress	52	9	0.0313105229180116	5
After 79h PQ stress	53	9	0.0875962913418515	7
After 79h PQ stress	54	9	0	0
After 79h PQ stress	55	9	0.00596768270290121	3
After 79h PQ stress	56	9	0.108211273857079	9
After 79h PQ stress	57	9	0.0972334819618971	14
After 79h PQ stress	58	9	0.00304225352112676	2
After 79h PQ stress	59	9	0.0127516322089227	5
After 79h PQ stress	60	9	0.00489862566335556	1
After 79h PQ stress	61	9	0.162372881355932	1
After 79h PQ stress	62	9	0.0172574626865672	2
After 79h PQ stress	63	9	0.0577007846248788	9
After 79h PQ stress	64	9	0.0339757316202712	5
After 79h PQ stress	65	9	0.173967551622419	2
After 79h PQ stress	66	9	0.00342224458983392	1
After 79h PQ stress	67	9	0.155221518987342	2
After 79h PQ stress	68	9	0.115099457504521	7
After 79h PQ stress	69	9	0.033736279005141	12
After 79h PQ stress	70	9	0.00932080924855491	4
After 79h PQ stress	71	9	0.220408589426791	1
After 79h PQ stress	72	9	0.0102056359482102	1
After 79h PQ stress	73	9	0.0553408184551199	7
After 79h PQ stress	74	9	0.0398621540993725	5
After 79h PQ stress	75	9	0.100033211557622	3
After 79h PQ stress	76	9	0.10258120798481	3
After 79h PQ stress	77	9	0.0116109295696308	2
After 79h PQ stress	78	9	0.102915714384653	5
After 79h PQ stress	79	9	0.02776375567895	1
After 79h PQ stress	1	10	0.0208026208026208	5
After 79h PQ stress	2	10	0.0605356240525518	3
After 79h PQ stress	3	10	0.0562368143459916	5
After 79h PQ stress	4	10	0.0910746812386157	8
After 79h PQ stress	5	10	0.0807053411704574	5
After 79h PQ stress	6	10	0.152193375111907	4
After 79h PQ stress	7	10	0.044195206622605	4
After 79h PQ stress	8	10	0.109728894989705	2
After 79h PQ stress	9	10	0	0
After 79h PQ stress	10	10	0.23543874523103	2
After 79h PQ stress	11	10	0.0241718889883617	3
After 79h PQ stress	12	10	0.0298285489799927	5
After 79h PQ stress	13	10	0.166530612244898	2
After 79h PQ stress	14	10	0.0405943087383531	7
After 79h PQ stress	15	10	0.0555604785112982	2
After 79h PQ stress	16	10	0.176727105806748	1
After 79h PQ stress	17	10	0.0827461524198034	10
After 79h PQ stress	18	10	0.0417980677779446	7
After 79h PQ stress	19	10	0.0427488505032931	11
After 79h PQ stress	20	10	0.0613740458015267	6
After 79h PQ stress	21	10	0.0275046382189239	4
After 79h PQ stress	22	10	0.0161593707250342	3
After 79h PQ stress	23	10	0.0403983840646374	3
After 79h PQ stress	24	10	0.0611737089201878	3
After 79h PQ stress	25	10	0.0150594451783355	5
After 79h PQ stress	26	10	0.029144167468008	3
After 79h PQ stress	27	10	0.00846075746854136	3
After 79h PQ stress	28	10	0.0337722890807133	2
After 79h PQ stress	29	10	0.0244071041157078	5
After 79h PQ stress	30	10	0.0409044291268157	7
After 79h PQ stress	31	10	0.211488250652742	1
After 79h PQ stress	32	10	0.0784346308836359	5
After 79h PQ stress	33	10	0.0574215033301618	6
After 79h PQ stress	34	10	0.00812715189366643	5
After 79h PQ stress	35	10	0.0163733741392502	4
After 79h PQ stress	36	10	0.0292255459717379	5
After 79h PQ stress	37	10	0.117492416582406	2
After 79h PQ stress	38	10	0.0673020239732757	6
After 79h PQ stress	39	10	0.00930669065029523	2
After 79h PQ stress	40	10	0.0563784868830899	11
After 79h PQ stress	41	10	0.0316845514000889	6
After 79h PQ stress	42	10	0.0507012866581662	16
After 79h PQ stress	1	11	0.153579676674365	10
After 79h PQ stress	2	11	0.187348814707305	6
After 79h PQ stress	3	11	0.116243808753664	8
After 79h PQ stress	4	11	0.209420416739625	2
After 79h PQ stress	5	11	0.0830011723329426	6
After 79h PQ stress	6	11	0.0744722312439104	7
After 79h PQ stress	7	11	0.200193588794625	1
After 79h PQ stress	8	11	0.0863107602825094	2
After 79h PQ stress	9	11	0.151397931826886	3
After 79h PQ stress	10	11	0.00970643939393939	3
After 79h PQ stress	11	11	0.280165289256198	2
After 79h PQ stress	12	11	0.0832416502946955	4
After 79h PQ stress	13	11	0.226459750948065	2
After 79h PQ stress	14	11	0.124415027018642	5
After 79h PQ stress	15	11	0.233005617977528	1
After 79h PQ stress	16	11	0.195589825567728	3
After 79h PQ stress	17	11	0.0612373737373737	4
After 79h PQ stress	18	11	0.141637798650048	5
After 79h PQ stress	19	11	0.190753372745187	2
After 79h PQ stress	20	11	0.163243980009087	2
After 79h PQ stress	21	11	0.0477894736842105	2
After 79h PQ stress	22	11	0.0936335611848278	3
After 79h PQ stress	23	11	0.185822987585102	1
Before PQ stress	2	12	0.0740632835820895	1
Before PQ stress	3	12	0.0743165652583769	4
Before PQ stress	4	12	0.0506957810667906	1
Before PQ stress	5	12	0.0656134556043287	4
Before PQ stress	6	12	0.0562912299162249	6
Before PQ stress	7	12	0.0464973824954059	4
Before PQ stress	8	12	0.0454917021951305	8
Before PQ stress	1	13	0.0816326530612245	3
Before PQ stress	2	13	0.0930274730256596	1
Before PQ stress	3	13	0.11340206185567	3
Before PQ stress	4	13	0.118269446312486	5
Before PQ stress	5	13	0.00608357434925701	2
Before PQ stress	6	13	0.0755623100303951	1
Before PQ stress	7	13	0.0532324439134475	4
Before PQ stress	8	13	0.0477272727272727	3
Before PQ stress	9	13	0.0317838696861343	1
Before PQ stress	10	13	0.0567186340014848	3
Before PQ stress	11	13	0.0975016223231668	4
Before PQ stress	12	13	0.147032418952618	3
Before PQ stress	13	13	0.125158946412352	1
Before PQ stress	14	13	0.111712826860591	1
Before PQ stress	15	13	0.117592763522245	2
Before PQ stress	16	13	0.109547250918672	1
Before PQ stress	17	13	0.117056365901928	3
Before PQ stress	18	13	0.0756130790190736	1
Before PQ stress	19	13	0.0486685032139578	3
Before PQ stress	20	13	0.0462619449128724	1
Before PQ stress	21	13	0.0325231683860815	1
Before PQ stress	22	13	0.0489785872507999	1
Before PQ stress	23	13	0.126871997739474	2
Before PQ stress	24	13	0.083680981595092	3
Before PQ stress	25	13	0.0813246053138236	3
Before PQ stress	26	13	0.095972398253767	3
Before PQ stress	27	13	0	0
Before PQ stress	28	13	0.118233726684431	8
Before PQ stress	29	13	0.0316494217894096	3
Before PQ stress	30	13	0.0854368932038835	3
Before PQ stress	31	13	0.125164614944174	2
Before PQ stress	32	13	0.0552693208430913	3
Before PQ stress	33	13	0.0693862228617907	1
Before PQ stress	34	13	0.0654119807206794	2
Before PQ stress	35	13	0.0905144694533762	3
Before PQ stress	36	13	0.0571088637715645	4
Before PQ stress	37	13	0.0605944757717672	4
Before PQ stress	38	13	0.0749670966043696	2
Before PQ stress	39	13	0.0751601423487545	3
Before PQ stress	40	13	0.0386266094420601	5
Before PQ stress	41	13	0	0
Before PQ stress	42	13	0.0275564090254441	2
Before PQ stress	43	13	0.0117647058823529	1
Before PQ stress	44	13	0.0880571517316353	2
Before PQ stress	45	13	0.099264076672942	2
Before PQ stress	46	13	0.0101967799642218	3
Before PQ stress	47	13	0.108589647411853	1
Before PQ stress	48	13	0.0808004052684904	5
Before PQ stress	49	13	0.0477308294209703	3
Before PQ stress	50	13	0.052801615345785	4
Before PQ stress	51	13	0.0824871648602396	2
Before PQ stress	52	13	0.0139429312581064	2
Before PQ stress	53	13	0.10098721475967	1
Before PQ stress	54	13	0.0930547713156409	2
Before PQ stress	55	13	0.0840488656195462	3
Before PQ stress	56	13	0.068714632174616	4
Before PQ stress	57	13	0.0340485601355167	5
Before PQ stress	58	13	0.0788375558867362	2
Before PQ stress	59	13	0.0461922596754057	5
Before PQ stress	60	13	0.0930604778781297	4
Before PQ stress	61	13	0.0842105263157895	2
Before PQ stress	62	13	0.0273539836646633	3
Before PQ stress	63	13	0.0488372093023256	1
Before PQ stress	64	13	0.0524641596583729	3
Before PQ stress	65	13	0.0574628085662907	5
Before PQ stress	66	13	0.00327218641546852	1
Before PQ stress	67	13	0.0913919413919414	2
Before PQ stress	68	13	0.00568635275339186	1
Before PQ stress	69	13	0.0400259909031839	2
Before PQ stress	70	13	0.00916808149405772	3
Before PQ stress	71	13	0.0565125415533394	3
Before PQ stress	72	13	0.0588362068965517	2
Before PQ stress	73	13	0.0506340917568072	2
Before PQ stress	74	13	0.0740740740740741	3
Before PQ stress	75	13	0.0300668151447661	1
Before PQ stress	76	13	0.127719298245614	6
Before PQ stress	77	13	0.0020545746388443	1
Before PQ stress	78	13	0.096369073045707	3
Before PQ stress	79	13	0.0600909565347051	3
Before PQ stress	80	13	0.074500537056928	11
Before PQ stress	81	13	0.0158045977011494	2
Before PQ stress	82	13	0.138009787928222	1
Before PQ stress	83	13	0.0532786885245902	1
Before PQ stress	84	13	0.150969058143489	1
Before PQ stress	85	13	0.0730484463359179	4
Before PQ stress	86	13	0.127715276303686	3
Before PQ stress	87	13	0	0
Before PQ stress	88	13	0.0943266171792153	3
Before PQ stress	89	13	0.0741068139963168	3
Before PQ stress	90	13	0.0656733524355301	4
Before PQ stress	91	13	0.0932428262881827	5
Before PQ stress	92	13	0.0764742204384069	4
Before PQ stress	93	13	0.13388360380526	1
Before PQ stress	94	13	0.144368059227922	2
Before PQ stress	1	14	0.131002782145881	2
Before PQ stress	2	14	0.0632443531827515	2
Before PQ stress	3	14	0.0705959018173919	1
Before PQ stress	4	14	0.054738471746102	2
Before PQ stress	5	14	0.0809093291404612	1
Before PQ stress	6	14	0.0561919504643963	2
Before PQ stress	7	14	0.0955591572123177	2
Before PQ stress	8	14	0.0475178890876565	3
Before PQ stress	9	14	0.0392142327650111	2
Before PQ stress	10	14	0.0519685039370079	1
Before PQ stress	11	14	0.0661040787623066	1
Before PQ stress	12	14	0.0794119284958512	5
Before PQ stress	13	14	0.0596179818637855	1
Before PQ stress	14	14	0.0506349856616141	3
Before PQ stress	15	14	0.0497388144446968	5
Before PQ stress	16	14	0.0515802615152113	3
Before PQ stress	17	14	0.0389182629799775	4
Before PQ stress	18	14	0.0808612207121633	4
Before PQ stress	19	14	0.0850263355906697	2
Before PQ stress	20	14	0.0882668766554514	2
Before PQ stress	21	14	0.0627333056822895	3
Before PQ stress	22	14	0.0803067270826072	3
Before PQ stress	23	14	0.0324586048179807	2
Before PQ stress	24	14	0.0738435474366529	2
Before PQ stress	1	15	0.101816608094439	6
Before PQ stress	2	15	0.0429427430093209	4
Before PQ stress	3	15	0.103967007990252	4
Before PQ stress	4	15	0.0431433628318584	7
Before PQ stress	5	15	0.0490834539315003	1
Before PQ stress	6	15	0.0756510708156108	8
Before PQ stress	1	16	0.1669341894061	2
Before PQ stress	2	16	0.093414779499404	3
Before PQ stress	3	16	0.0691405244382332	8
Before PQ stress	4	16	0.111166253101737	3
Before PQ stress	5	16	0.096011396011396	4
Before PQ stress	6	16	0.145876543209877	2
Before PQ stress	7	16	0.151903386715673	1
Before PQ stress	9	16	0.0500615685108913	5
Before PQ stress	10	16	0.0472103004291846	1
Before PQ stress	11	16	0.125845316750874	4
Before PQ stress	12	16	0.0644348280945361	8
Before PQ stress	13	16	0.0894463667820069	5
Before PQ stress	14	16	0.0889845530514054	1
Before PQ stress	15	16	0.0714775347416963	5
Before PQ stress	16	16	0.0654073199527745	1
Before PQ stress	17	16	0.0988552188552189	4
Before PQ stress	18	16	0.0667362379337334	4
Before PQ stress	19	16	0.056551724137931	4
Before PQ stress	20	16	0.0975966562173459	5
Before PQ stress	21	16	0.107858636340456	2
Before PQ stress	22	16	0.0385889824658291	4
Before PQ stress	23	16	0.101656837966863	1
Before PQ stress	24	16	0.0857142857142857	3
Before PQ stress	25	16	0.126438445393356	1
Before PQ stress	26	16	0.0452585087035594	6
Before PQ stress	27	16	0.0894192521877486	2
Before PQ stress	28	16	0.109792145638812	6
Before PQ stress	29	16	0.0768603903066695	4
Before PQ stress	30	16	0.0728536670142509	4
Before PQ stress	31	16	0.0365657397357686	4
Before PQ stress	32	16	0.133303461409208	5
Before PQ stress	33	16	0.102505354385615	1
Before PQ stress	34	16	0.0338634237605238	3
Before PQ stress	35	16	0.116248919619706	3
Before PQ stress	36	16	0.0981705849313969	2
Before PQ stress	37	16	0.052695652173913	2
Before PQ stress	1	17	0.0636469467668536	10
Before PQ stress	2	17	0.0453877070875404	5
Before PQ stress	3	17	0.0931052358735096	3
Before PQ stress	4	17	0.0755851063829787	1
Before PQ stress	5	17	0.0567783891945973	3
Before PQ stress	7	17	0.109597362027074	3
Before PQ stress	8	17	0.075380316671841	2
Before PQ stress	9	17	0.0884303610906411	3
Before PQ stress	10	17	0.124491505144771	4
Before PQ stress	11	17	0.0183450429352069	1
Before PQ stress	12	17	0.079356876256101	2
Before PQ stress	13	17	0.0754297935345891	4
Before PQ stress	14	17	0.0596424010217114	5
Before PQ stress	15	17	0.0508824633871573	1
Before PQ stress	16	17	0.0993371996685998	3
Before PQ stress	17	17	0.106654865298446	3
Before PQ stress	18	17	0.0794047619047619	2
Before PQ stress	19	17	0.0786044812469557	1
Before PQ stress	20	17	0.104561611374408	2
Before PQ stress	21	17	0.0737182448036952	3
Before PQ stress	22	17	0.0688516746411483	4
Before PQ stress	23	17	0.0895743003547497	3
Before PQ stress	24	17	0.126063310556408	1
Before PQ stress	25	17	0.064478667003282	4
Before PQ stress	26	17	0.135677233429395	4
Before PQ stress	27	17	0.0927289164406561	2
Before PQ stress	28	17	0.143204841468228	3
Before PQ stress	29	17	0.0413459817433327	8
Before PQ stress	30	17	0.144234079173838	3
Before PQ stress	31	17	0.0705776173285199	4
Before PQ stress	32	17	0.0655791910062824	2
Before PQ stress	33	17	0.0904772004241781	7
Before PQ stress	34	17	0.124856721794662	2
Before PQ stress	35	17	0.101783590963139	4
Before PQ stress	1	18	0.110402268297005	4
Before PQ stress	2	18	0.0620699146710707	1
Before PQ stress	3	18	0.0586191923577942	2
Before PQ stress	4	18	0.0680773752271027	4
Before PQ stress	5	18	0.103989535644212	1
Before PQ stress	6	18	0.0921401515151515	4
Before PQ stress	7	18	0.1192287803797	3
Before PQ stress	8	18	0.0686565427357887	2
Before PQ stress	9	18	0.0902035437106458	2
Before PQ stress	10	18	0	0
Before PQ stress	11	18	0.0532881355932203	5
Before PQ stress	12	18	0.0738597216480639	3
Before PQ stress	13	18	0.0769482377954044	4
Before PQ stress	14	18	0.0822824716267339	3
Before PQ stress	15	18	0.110793770544808	2
Before PQ stress	16	18	0.0998237367802585	2
Before PQ stress	17	18	0.0714382174206617	2
Before PQ stress	18	18	0.133045223028245	2
Before PQ stress	19	18	0.0333881578947368	3
Before PQ stress	20	18	0.0630635739806046	3
Before PQ stress	21	18	0.0253684139694502	2
Before PQ stress	22	18	0.0574845679012346	4
Before PQ stress	23	18	0.0598896769109535	1
Before PQ stress	24	18	0.0552046533204867	3
Before PQ stress	25	18	0.0244113573407202	2
Before PQ stress	26	18	0.12122905027933	3
Before PQ stress	27	18	0.0715457352373601	2
Before PQ stress	28	18	0.0596694214876033	3
Before PQ stress	29	18	0.017520573400584	1
Before PQ stress	30	18	0.082389597938762	4
Before PQ stress	31	18	0.0894089683228962	4
Before PQ stress	32	18	0.0935377875136911	3
Before PQ stress	33	18	0.0619941728714794	1
Before PQ stress	34	18	0.0610940535121248	3
Before PQ stress	35	18	0.146996165317427	3
Before PQ stress	36	18	0.12722826944313	1
Before PQ stress	37	18	0.0451327433628319	1
Before PQ stress	38	18	0.0927378640776699	2
Before PQ stress	39	18	0.0615143224975861	3
Before PQ stress	40	18	0.0772206668363452	2
Before PQ stress	41	18	0.0794994675186368	2
Before PQ stress	42	18	0.0706698767879904	1
Before PQ stress	43	18	0.0825204483489852	1
Before PQ stress	1	19	0.126981450252951	1
Before PQ stress	2	19	0.120232896652111	2
Before PQ stress	3	19	0.125990338164251	3
Before PQ stress	4	19	0.1184165232358	2
Before PQ stress	5	19	0.0694854655681642	5
Before PQ stress	6	19	0.104085733422639	3
Before PQ stress	7	19	0.088135593220339	1
Before PQ stress	8	19	0.0837378640776699	3
Before PQ stress	9	19	0.0676785714285714	1
Before PQ stress	10	19	0.0817777777777778	1
Before PQ stress	11	19	0.14640522875817	1
Before PQ stress	12	19	0.10836521559301	3
Before PQ stress	13	19	0.0757722007722008	2
Before PQ stress	14	19	0.129159978598181	3
Before PQ stress	15	19	0.0769010043041607	3
Before PQ stress	16	19	0.0704213241616509	1
Before PQ stress	17	19	0.193663292088489	1
Before PQ stress	18	19	0.050179211469534	2
Before PQ stress	19	19	0.17	2
Before PQ stress	20	19	0.0527274232265541	5
Before PQ stress	21	19	0.0446196358907672	3
Before PQ stress	22	19	0.116776909200241	2
Before PQ stress	23	19	0.0945370175068551	6
Before PQ stress	24	19	0.0916469742114456	4
Before PQ stress	25	19	0.0855421686746988	2
Before PQ stress	26	19	0.13060837788455	2
Before PQ stress	27	19	0.100295285612463	3
Before PQ stress	28	19	0.157034795763994	2
Before PQ stress	29	19	0.168203072812291	2
Before PQ stress	30	19	0.133068783068783	4
Before PQ stress	31	19	0.0619170470331415	9
Before PQ stress	32	19	0.108482142857143	1
Before PQ stress	33	19	0.0190179267342167	2
Before PQ stress	34	19	0.0677662870358249	3
Before PQ stress	35	19	0.0427837992013691	3
Before PQ stress	36	19	0.0428029618927217	4
Before PQ stress	37	19	0.0399133663366337	1
Before PQ stress	38	19	0.0954362416107383	3
Before PQ stress	39	19	0.0661825298722703	4
Before PQ stress	40	19	0.199530791788856	6
Before PQ stress	41	19	0.111952662721893	3
Before PQ stress	42	19	0.0901065449010655	2
Before PQ stress	43	19	0.173605655930872	1
Before PQ stress	44	19	0.156862745098039	2
Before PQ stress	45	19	0.127844195912071	2
Before PQ stress	46	19	0.0652415562206071	3
Before PQ stress	47	19	0.108657243816254	2
Before PQ stress	48	19	0.0120915032679739	1
Before PQ stress	49	19	0.0359941944847605	2
Before PQ stress	50	19	0.0551678611844587	2
Before PQ stress	51	19	0.0909182643794147	2
Before PQ stress	52	19	0.114977888867525	3
Before PQ stress	53	19	0.0967475648010566	4
Before PQ stress	54	19	0.11301558203483	5
Before PQ stress	55	19	0.0975574712643678	1
Before PQ stress	56	19	0.108363163032867	2
Before PQ stress	57	19	0.1105	4
Before PQ stress	58	19	0.138664710198092	3
Before PQ stress	59	19	0.117811278615299	4
Before PQ stress	60	19	0.0657713777202492	3
Before PQ stress	1	20	0.122786885245902	1
Before PQ stress	2	20	0.0176591375770021	1
Before PQ stress	3	20	0.0656057866184449	2
Before PQ stress	4	20	0.0987501546838263	2
Before PQ stress	5	20	0.10485312899106	2
Before PQ stress	6	20	0.0862614990197557	2
Before PQ stress	7	20	0.0469792986903253	3
Before PQ stress	8	20	0.0677538342069501	1
Before PQ stress	9	20	0.102184565128624	4
Before PQ stress	10	20	0.051028179741051	1
Before PQ stress	11	20	0.105513728963685	1
Before PQ stress	12	20	0.0624869601502191	2
Before PQ stress	13	20	0.0407792636618788	6
Before PQ stress	14	20	0.100786749482402	2
Before PQ stress	15	20	0.0983749591013197	5
Before PQ stress	16	20	0.0400958945160324	3
Before PQ stress	17	20	0.0846569250317662	3
Before PQ stress	18	20	0.0729266318345721	3
Before PQ stress	19	20	0.0894327538883806	2
Before PQ stress	20	20	0.0695812241141279	4
Before PQ stress	21	20	0.0803841599789501	2
Before PQ stress	22	20	0.0771107089464159	3
Before PQ stress	23	20	0.0701057082452431	2
Before PQ stress	24	20	0.0816051256111954	1
Before PQ stress	25	20	0.0814583333333333	3
Before PQ stress	26	20	0.0810727178958226	1
Before PQ stress	27	20	0.100515463917526	2
Before PQ stress	28	20	0.048135593220339	1
Before PQ stress	29	20	0.0495254529767041	1
Before PQ stress	30	20	0.0927040439235561	2
Before PQ stress	31	20	0.106356413166856	3
Before PQ stress	32	20	0.0816247582205029	2
Before PQ stress	33	20	0	0
Before PQ stress	34	20	0.113550135501355	1
Before PQ stress	35	20	0.0826284970722186	2
Before PQ stress	36	20	0.111540318686625	1
Before PQ stress	37	20	0.051683262209578	1
Before PQ stress	38	20	0.080276134122288	4
Before PQ stress	39	20	0.109116022099447	2
Before PQ stress	40	20	0.0821571238348868	1
Before PQ stress	41	20	0.10637610976594	2
Before PQ stress	42	20	0.0492723492723493	3
Before PQ stress	43	20	0.0754770318021201	2
Before PQ stress	44	20	0.105331599479844	1
Before PQ stress	45	20	0.0948825633846632	2
Before PQ stress	46	20	0.14015444015444	1
Before PQ stress	47	20	0.0893483254745496	1
Before PQ stress	48	20	0.0987740805604203	3
Before PQ stress	49	20	0.0759	2
Before PQ stress	50	20	0.099817609020063	3
Before PQ stress	51	20	0.12430426716141	4
Before PQ stress	1	21	0.125922887612797	1
Before PQ stress	2	21	0.0901926444833625	4
Before PQ stress	3	21	0.101677507702841	1
Before PQ stress	4	21	0.117937853107345	3
Before PQ stress	5	21	0.125146198830409	3
Before PQ stress	6	21	0.086258776328987	1
Before PQ stress	7	21	0.0736595370641664	4
Before PQ stress	8	21	0.0737014103887169	2
Before PQ stress	9	21	0.0873977489390491	5
Before PQ stress	10	21	0.097	4
Before PQ stress	11	21	0.142329379739452	1
Before PQ stress	12	21	0.122564781539625	3
Before PQ stress	13	21	0.0741185897435897	1
Before PQ stress	14	21	0.0740690405001359	2
Before PQ stress	15	21	0.0541884816753927	2
Before PQ stress	16	21	0.19327251995439	1
Before PQ stress	17	21	0.0969147005444646	4
Before PQ stress	18	21	0.093755450898308	4
Before PQ stress	19	21	0.0959915611814346	2
Before PQ stress	20	21	0.107909787417719	6
Before PQ stress	21	21	0.126601941747573	1
Before PQ stress	22	21	0.132314728198732	2
Before PQ stress	23	21	0.0935159817351598	2
Before PQ stress	24	21	0.103242212333121	2
Before PQ stress	25	21	0.0735136295342348	3
Before PQ stress	26	21	0.0998212437670524	4
Before PQ stress	27	21	0.0755519215044971	3
Before PQ stress	28	21	0.121173196317705	3
Before PQ stress	30	21	0.0874829931972789	2
Before PQ stress	31	21	0.0825934338220111	4
Before PQ stress	32	21	0.139284233798535	3
Before PQ stress	33	21	0.0822057177739343	1
Before PQ stress	34	21	0.118887262079063	3
Before PQ stress	35	21	0.0916974875653616	2
Before PQ stress	36	21	0.105682451253482	4
Before PQ stress	37	21	0.0619633099141296	1
Before PQ stress	38	21	0.0713859275053305	4
Before PQ stress	39	21	0.0870565045992116	3
Before PQ stress	40	21	0.0830932860624861	3
Before PQ stress	41	21	0.0544495490896716	1
Before PQ stress	42	21	0.0921175373134328	4
Before PQ stress	43	21	0.0661042558549484	2
Before PQ stress	44	21	0.113454288407163	2
Before PQ stress	45	21	0.127469525010509	2
Before PQ stress	46	21	0.115922330097087	1
Before PQ stress	47	21	0.0910204991087344	3
Before PQ stress	48	21	0.0512142341909113	2
Before PQ stress	49	21	0.0618177202335618	2
Before PQ stress	50	21	0.0968792401628222	4
Before PQ stress	51	21	0.100919540229885	4
Before PQ stress	52	21	0.0833248238537731	4
Before PQ stress	53	21	0.122072820667775	3
Before PQ stress	54	21	0.0983706720977597	1
Before PQ stress	55	21	0.142111050027488	1
Before PQ stress	56	21	0.095394041833932	3
Before PQ stress	57	21	0.107751742672378	3
Before PQ stress	58	21	0.077705938697318	3
Before PQ stress	59	21	0.0735232383808096	4
Before PQ stress	60	21	0.109138882225953	6
Before PQ stress	61	21	0.0513243426797322	4
Before PQ stress	62	21	0.0858302725691088	2
Before PQ stress	63	21	0.131771117166213	4
Before PQ stress	64	21	0.0882934057792047	3
Before PQ stress	65	21	0.0820521987844119	2
Before PQ stress	1	22	0.0547081255500147	1
Before PQ stress	2	22	0.0711808422791082	2
Before PQ stress	3	22	0.0995981245813798	2
Before PQ stress	4	22	0.133786848072562	2
Before PQ stress	5	22	0.127810650887574	1
Before PQ stress	6	22	0.104431695352124	7
Before PQ stress	7	22	0.127098604871128	1
Before PQ stress	8	22	0.0769979321250456	12
Before PQ stress	9	22	0.0653146436027438	2
Before PQ stress	10	22	0.0905007587253414	3
Before PQ stress	11	22	0.0819760479041916	2
Before PQ stress	12	22	0.0966364812419146	3
Before PQ stress	13	22	0.0759642684024652	2
Before PQ stress	14	22	0.0892917274666068	5
Before PQ stress	15	22	0.099116569704805	6
Before PQ stress	16	22	0.104389239284335	2
Before PQ stress	17	22	0.117787578096288	3
Before PQ stress	18	22	0.0966610073571024	4
Before PQ stress	19	22	0.0858485639686684	2
Before PQ stress	20	22	0.065921568627451	4
Before PQ stress	21	22	0.0956888190240476	6
Before PQ stress	22	22	0.073124959554779	4
Before PQ stress	23	22	0.120296671490593	2
Before PQ stress	24	22	0.103809950694756	3
Before PQ stress	25	22	0.0762482168330956	3
Before PQ stress	26	22	0.164418706934467	2
Before PQ stress	27	22	0.0999500249875063	4
Before PQ stress	28	22	0.0988551803091013	2
Before PQ stress	29	22	0.0821127792017576	3
Before PQ stress	30	22	0.106245928928132	3
Before PQ stress	31	22	0.039541547277937	2
Before PQ stress	32	22	0.0908824248350037	4
Before PQ stress	33	22	0.0742100768573869	3
Before PQ stress	34	22	0.13153952523623	2
Before PQ stress	35	22	0.0844584228290887	5
Before PQ stress	36	22	0.117959463853463	5
Before PQ stress	37	22	0.123266311038162	1
Before PQ stress	38	22	0.0779856115107914	4
Before PQ stress	39	22	0.0773696470166637	9
Before PQ stress	40	22	0.110107344032309	2
Before PQ stress	41	22	0.107898009950249	4
Before PQ stress	42	22	0.0956831965750981	1
Before PQ stress	43	22	0.0991620918809593	8
Before PQ stress	44	22	0.0611150317572336	3
Before PQ stress	45	22	0.0698751599100093	1
Before PQ stress	46	22	0.0622612681436211	1
Before PQ stress	47	22	0.082319255547602	4
Before PQ stress	48	22	0.117564352152282	2
Before PQ stress	49	22	0.0801282051282051	1
Before PQ stress	50	22	0.0715278850610227	4
Before PQ stress	51	22	0.0677930527862315	1
Before PQ stress	52	22	0.100921701889954	5
Before PQ stress	53	22	0.0855544252288911	6
Before PQ stress	54	22	0.103297997644287	2
Before PQ stress	55	22	0.0371289322108994	2
Before PQ stress	56	22	0.079926273458445	1
Before PQ stress	57	22	0.0632022471910112	2
Before PQ stress	58	22	0.111159764794195	4
Before PQ stress	59	22	0.0601688951442646	3
Before PQ stress	60	22	0.0689249913584514	5
Before PQ stress	61	22	0.112494685051327	1
Before PQ stress	62	22	0.15818053596615	3
Before PQ stress	63	22	0.0758477096966092	5
Before PQ stress	64	22	0.105116909522196	4
Before PQ stress	65	22	0.0573534492686859	1
Before PQ stress	66	22	0.097878701594533	4
Before PQ stress	67	22	0.0652283496320194	2
Before PQ stress	68	22	0.0568723857048507	4
Before PQ stress	69	22	0.0850648375306664	3
Before PQ stress	70	22	0.0448905109489051	2
Before PQ stress	71	22	0.0985247629083246	1
Before PQ stress	72	22	0.0686611083864639	1
Before PQ stress	73	22	0.0538152610441767	1
Before PQ stress	74	22	0.0963149924280666	2
Before PQ stress	1	23	0.0895482009198305	4
Before PQ stress	2	23	0.12746062992126	3
Before PQ stress	3	23	0.018974358974359	1
Before PQ stress	4	23	0	0
Before PQ stress	5	23	0.134246733060849	4
Before PQ stress	6	23	0.117833553500661	2
Before PQ stress	7	23	0.0893371757925072	7
Before PQ stress	8	23	0.11400504103923	4
Before PQ stress	9	23	0.119672954825743	6
Before PQ stress	10	23	0.0994258084013297	2
Before PQ stress	11	23	0.0945540503682153	2
Before PQ stress	12	23	0.135623588065747	4
Before PQ stress	13	23	0.0808026447297609	5
Before PQ stress	14	23	0.109894736842105	3
Before PQ stress	15	23	0.0768017587459377	2
Before PQ stress	16	23	0.081522036682179	2
Before PQ stress	17	23	0.0800348735832607	4
Before PQ stress	18	23	0.103251346615614	4
Before PQ stress	19	23	0.0888109658909786	3
Before PQ stress	21	23	0.0757391039317281	4
Before PQ stress	22	23	0.0735952768729642	3
Before PQ stress	23	23	0.138550185873606	3
Before PQ stress	24	23	0.0740283493369913	2
Before PQ stress	25	23	0.108181026979983	1
Before PQ stress	26	23	0.0765807327001357	3
Before PQ stress	27	23	0.12987353384444	1
Before PQ stress	28	23	0.10323005932762	2
Before PQ stress	29	23	0.113669064748201	1
Before PQ stress	30	23	0.109061326658323	4
Before PQ stress	31	23	0.0874297393970363	2
Before PQ stress	32	23	0.0848594273923136	3
Before PQ stress	33	23	0.107494896471274	5
Before PQ stress	34	23	0.116933445661331	3
Before PQ stress	35	23	0.102379693283977	3
Before PQ stress	36	23	0.0782955499580185	2
Before PQ stress	37	23	0.0973304694691623	5
Before PQ stress	38	23	0.0830088920932468	2
Before PQ stress	39	23	0.095533033033033	8
Before PQ stress	40	23	0.124938108598779	3
Before PQ stress	41	23	0.173847051955633	1
Before PQ stress	42	23	0.0911030509921058	4
Before PQ stress	43	23	0.108952816238742	3
Before PQ stress	1	24	0.145509790681972	3
Before PQ stress	3	24	0.138057142857143	2
Before PQ stress	4	24	0.0860215053763441	1
Before PQ stress	5	24	0.130991990141713	2
Before PQ stress	6	24	0.16072936012156	1
Before PQ stress	7	24	0.0955492037566354	3
Before PQ stress	8	24	0.140138142747506	3
Before PQ stress	9	24	0.106975754997873	2
Before PQ stress	10	24	0.0917630057803468	2
Before PQ stress	11	24	0.117111111111111	2
Before PQ stress	12	24	0.124598587026333	2
Before PQ stress	13	24	0.124521072796935	1
Before PQ stress	14	24	0.103881278538813	2
Before PQ stress	15	24	0.127821710999281	1
Before PQ stress	16	24	0.119701655448426	2
Before PQ stress	17	24	0.0934436664544876	3
Before PQ stress	18	24	0.166508313539192	2
Before PQ stress	19	24	0.132635585156993	3
Before PQ stress	20	24	0.105193798449612	4
Before PQ stress	21	24	0.0717009345794392	6
Before PQ stress	22	24	0.0816901408450704	4
Before PQ stress	23	24	0.157386051619989	2
Before PQ stress	24	24	0.102962206332993	5
Before PQ stress	25	24	0.0964054213317619	4
Before PQ stress	26	24	0.0376401494927923	2
Before PQ stress	27	24	0.105662805662806	3
Before PQ stress	28	24	0.0637982195845697	2
Before PQ stress	29	24	0.105447655139744	3
Before PQ stress	30	24	0.0798711755233494	1
Before PQ stress	31	24	0.134471927758147	2
Before PQ stress	32	24	0.0930386740331492	4
Before PQ stress	33	24	0.0766666666666667	1
Before PQ stress	34	24	0	0
Before PQ stress	35	24	0.118719430858159	3
Before PQ stress	36	24	0.0693852708460134	1
Before PQ stress	37	24	0.137243401759531	5
Before PQ stress	38	24	0.0578723404255319	4
Before PQ stress	39	24	0	0
Before PQ stress	40	24	0.116282379732422	5
Before PQ stress	41	24	0.0973637571998228	3
Before PQ stress	42	24	0.0824194460146976	3
Before PQ stress	43	24	0.123205574912892	1
Before PQ stress	44	24	0.137051282051282	3
Before PQ stress	45	24	0	0
Before PQ stress	46	24	0	0
Before PQ stress	47	24	0.0546025339163583	2
Before PQ stress	48	24	0.085498742665549	2
Before PQ stress	49	24	0.102390617952188	2
Before PQ stress	50	24	0.0717202654415518	2
Before PQ stress	51	24	0.0881683731513083	1
Before PQ stress	52	24	0.153571428571429	1
Before PQ stress	53	24	0.11999057048562	2
Before PQ stress	54	24	0.152192792010421	2
Before PQ stress	1	25	0.119388214125056	3
Before PQ stress	2	25	0.0898064516129032	3
Before PQ stress	3	25	0.0663229018492176	2
Before PQ stress	4	25	0.171517671517671	3
Before PQ stress	5	25	0.0681592039800995	1
Before PQ stress	6	25	0.105685465382852	5
Before PQ stress	7	25	0.116557027703141	4
Before PQ stress	8	25	0.0853183520599251	5
Before PQ stress	9	25	0.178646196789951	1
Before PQ stress	10	25	0.0341104294478528	2
Before PQ stress	11	25	0.0656712640769328	4
Before PQ stress	12	25	0.0883913193248364	13
Before PQ stress	13	25	0.130376268715303	6
Before PQ stress	14	25	0.117206132879046	4
Before PQ stress	15	25	0.063695652173913	3
Before PQ stress	16	25	0.106730065837601	4
Before PQ stress	17	25	0.104119850187266	2
Before PQ stress	18	25	0.0642908054169636	2
Before PQ stress	19	25	0.100858102226091	3
Before PQ stress	20	25	0.110951008645533	2
Before PQ stress	21	25	0.0899023870068083	4
Before PQ stress	22	25	0.133077802434268	2
Before PQ stress	23	25	0.0638930163447251	1
Before PQ stress	24	25	0.0812590332423318	2
Before PQ stress	25	25	0.11921052631579	2
Before PQ stress	26	25	0.0696729338033686	3
Before PQ stress	27	25	0.082137061540382	1
Before PQ stress	28	25	0.0796797478866342	10
Before PQ stress	29	25	0.0857442073569839	2
Before PQ stress	30	25	0.100962208896946	4
Before PQ stress	31	25	0.0687892376681614	3
Before PQ stress	32	25	0.0975084937712344	4
Before PQ stress	33	25	0.0846273682094578	3
Before PQ stress	34	25	0.0938691905636389	3
Before PQ stress	35	25	0.147876288659794	3
Before PQ stress	36	25	0.0806463195691203	6
Before PQ stress	37	25	0.0685812647218699	1
Before PQ stress	38	25	0.0929336757283273	5
Before PQ stress	39	25	0.0760230547550432	5
Before PQ stress	40	25	0.0902817437654674	3
Before PQ stress	41	25	0.114635444385311	4
Before PQ stress	42	25	0.0951940192239231	3
Before PQ stress	43	25	0.156685808039377	3
Before PQ stress	44	25	0.0744407372969425	4
Before PQ stress	45	25	0.108487289901375	3
Before PQ stress	46	25	0.0737594993294591	4
Before PQ stress	47	25	0.0915455746367239	2
Before PQ stress	48	25	0.10642099385818	6
Before PQ stress	49	25	0.0966819806023481	5
Before PQ stress	50	25	0.0480184779965962	8
Before PQ stress	51	25	0.122163506372397	4
Before PQ stress	52	25	0.0442318514350028	5
Before PQ stress	53	25	0.089126559714795	2
Before PQ stress	54	25	0.0753309400942338	3
Before PQ stress	55	25	0.0804219823356232	8
Before PQ stress	56	25	0.0898368215679319	2
Before PQ stress	57	25	0.131127197518097	5
Before PQ stress	58	25	0.0662348325882675	4
Before PQ stress	59	25	0.0606233100896542	2
Before PQ stress	60	25	0.0758441558441558	3
After 7h PQ stress	1	26	0.07025	7
After 7h PQ stress	2	26	0.123769851601146	4
After 7h PQ stress	3	26	0.084710852917877	4
After 7h PQ stress	4	26	0.119268717353453	3
After 7h PQ stress	5	26	0.204505954296749	3
After 7h PQ stress	6	26	0.148964301454385	3
After 7h PQ stress	7	26	0.17224181972996	3
After 7h PQ stress	8	26	0.0949049485366836	10
After 7h PQ stress	9	26	0.11408304047898	9
After 7h PQ stress	10	26	0.106222454620154	2
After 7h PQ stress	11	26	0.162410763316859	3
After 7h PQ stress	12	26	0.184500648508431	3
After 7h PQ stress	13	26	0.0960226769421561	6
After 7h PQ stress	14	26	0.124870167339873	2
After 7h PQ stress	15	26	0.112401668338525	7
After 7h PQ stress	16	26	0.114898439543196	1
After 7h PQ stress	17	26	0.14496644295302	4
After 7h PQ stress	18	26	0.1430781129157	2
After 7h PQ stress	19	26	0.12	4
After 7h PQ stress	20	26	0.0978243917654398	10
After 7h PQ stress	21	26	0.238757240652975	2
After 7h PQ stress	22	26	0.0822721419373301	4
After 7h PQ stress	23	26	0.118501798688016	2
After 7h PQ stress	24	26	0.0972350230414746	5
After 7h PQ stress	25	26	0.0911757634046646	9
After 7h PQ stress	26	26	0.129808773903262	5
After 7h PQ stress	27	26	0.0637434554973822	1
After 7h PQ stress	1	27	0.132628944807452	4
After 7h PQ stress	2	27	0.130882352941176	3
After 7h PQ stress	3	27	0	0
After 7h PQ stress	4	27	0.0652837573385519	3
After 7h PQ stress	5	27	0.19095114194854	2
After 7h PQ stress	6	27	0.0981143885454972	12
After 7h PQ stress	7	27	0.196780185758514	1
After 7h PQ stress	8	27	0.099009900990099	5
After 7h PQ stress	9	27	0.137137137137137	5
After 7h PQ stress	10	27	0.152402572833901	2
After 7h PQ stress	11	27	0	0
After 7h PQ stress	12	27	0.0874441687344913	5
After 7h PQ stress	13	27	0.0676338479012856	6
After 7h PQ stress	14	27	0.0894435777431097	3
After 7h PQ stress	15	27	0.0386198163975942	2
After 7h PQ stress	16	27	0.107208553690504	3
After 7h PQ stress	17	27	0.105945366898768	2
After 7h PQ stress	18	27	0.12201407473486	3
After 7h PQ stress	19	27	0.0434389140271493	1
After 7h PQ stress	20	27	0.141815097540288	6
After 7h PQ stress	21	27	0.10929472209248	3
After 7h PQ stress	22	27	0.114932520679147	4
After 7h PQ stress	23	27	0.0961371091919395	8
After 7h PQ stress	24	27	0.152274368231047	1
After 7h PQ stress	25	27	0.104500978473581	3
After 7h PQ stress	26	27	0.157720501300544	2
After 7h PQ stress	27	27	0.0923202614379085	3
After 7h PQ stress	28	27	0.122924116011124	7
After 7h PQ stress	29	27	0.0165501644736842	2
After 7h PQ stress	30	27	0.117964071856287	1
After 7h PQ stress	31	27	0.0239882266372333	5
After 7h PQ stress	32	27	0.156948228882834	2
After 7h PQ stress	33	27	0.0882543802725503	4
After 7h PQ stress	34	27	0.027889634601044	5
After 7h PQ stress	35	27	0	0
After 7h PQ stress	36	27	0.0153075424436404	1
After 7h PQ stress	37	27	0	0
After 7h PQ stress	38	27	0.0174383644016837	3
After 7h PQ stress	39	27	0	0
After 7h PQ stress	40	27	0.202157303370787	3
After 7h PQ stress	41	27	0	0
After 7h PQ stress	1	28	0.0145685279187817	3
After 7h PQ stress	2	28	0.0842676473226298	3
After 7h PQ stress	3	28	0.0793452509153564	8
After 7h PQ stress	4	28	0.173176059414592	6
After 7h PQ stress	5	28	0	0
After 7h PQ stress	6	28	0	0
After 7h PQ stress	7	28	0	0
After 7h PQ stress	8	28	0.0974842767295597	6
After 7h PQ stress	9	28	0.0604509716659249	6
After 7h PQ stress	10	28	0.00217552796349358	1
After 7h PQ stress	11	28	0	0
After 7h PQ stress	12	28	0	0
After 7h PQ stress	13	28	0.0741701244813278	8
After 7h PQ stress	14	28	0	0
After 7h PQ stress	15	28	0.105757740358501	7
After 7h PQ stress	16	28	0.0747570621468927	8
After 7h PQ stress	17	28	0.113551122465619	9
After 7h PQ stress	18	28	0.0859069232034205	9
After 7h PQ stress	19	28	0	0
After 7h PQ stress	20	28	0.0217728345129761	5
After 7h PQ stress	21	28	0.114041708043694	5
After 7h PQ stress	22	28	0.115012196023357	7
After 7h PQ stress	23	28	0.136941782932706	3
After 7h PQ stress	24	28	0.198500312434909	1
After 7h PQ stress	25	28	0.0946636074309822	6
After 7h PQ stress	26	28	0.0873921971252567	4
After 7h PQ stress	27	28	0.0713629201680672	4
After 7h PQ stress	28	28	0.118606264869151	6
After 7h PQ stress	29	28	0.112914477049714	7
After 7h PQ stress	30	28	0.0826474622770919	3
After 7h PQ stress	31	28	0.0996701030927835	8
After 7h PQ stress	32	28	0.0747807267342522	3
After 7h PQ stress	33	28	0.274718298682749	1
After 7h PQ stress	34	28	0.0859707989480367	5
After 7h PQ stress	35	28	0.0614967216821162	1
After 7h PQ stress	36	28	0.0828120870407894	1
After 7h PQ stress	37	28	0.0588085755444454	4
After 7h PQ stress	38	28	0.0883058586796688	3
After 7h PQ stress	39	28	0.115425721410759	4
After 7h PQ stress	40	28	0.171413146173573	4
After 7h PQ stress	41	28	0.0728968577379335	3
After 7h PQ stress	42	28	0.127127746135069	7
After 7h PQ stress	43	28	0.0920766283524904	10
After 7h PQ stress	44	28	0.0573148974130241	4
After 7h PQ stress	45	28	0.02269892741332	3
After 7h PQ stress	46	28	0	0
After 7h PQ stress	47	28	0.0869665513264129	9
After 7h PQ stress	48	28	0.0240405413756875	3
After 7h PQ stress	49	28	0.0330719742661842	3
After 7h PQ stress	50	28	0.00447446920512371	1
After 7h PQ stress	51	28	0.00948443579766537	1
After 7h PQ stress	52	28	0.0896597795485995	9
After 7h PQ stress	53	28	0.0996520874751491	2
After 7h PQ stress	54	28	0.085681426106958	2
After 7h PQ stress	55	28	0.118070739549839	4
After 7h PQ stress	56	28	0.118746081504702	4
After 7h PQ stress	57	28	0.0888111888111888	5
After 7h PQ stress	58	28	0.099025974025974	1
After 7h PQ stress	59	28	0.0405563867211192	7
After 7h PQ stress	1	29	0.153224804274885	1
After 7h PQ stress	2	29	0.0483753194596568	1
After 7h PQ stress	3	29	0.161329702319467	2
After 7h PQ stress	4	29	0.140239894840618	5
After 7h PQ stress	5	29	0.138542060789507	2
After 7h PQ stress	6	29	0.172657069310706	1
After 7h PQ stress	7	29	0.132619993885662	2
After 7h PQ stress	8	29	0.100605012964564	7
After 7h PQ stress	9	29	0.166350869371378	4
After 7h PQ stress	10	29	0.131425395943318	4
After 7h PQ stress	11	29	0.146446558477896	5
After 7h PQ stress	12	29	0.0582463054187192	8
After 7h PQ stress	13	29	0.0622965244170699	4
After 7h PQ stress	14	29	0.0705184420944029	8
After 7h PQ stress	15	29	0.0715076804545673	7
After 7h PQ stress	16	29	0.0937011972930765	10
After 7h PQ stress	17	29	0.0410139992432841	2
After 7h PQ stress	18	29	0.0975441916476711	8
After 7h PQ stress	19	29	0.137662337662338	5
After 7h PQ stress	20	29	0.0989366620434582	5
After 7h PQ stress	21	29	0.104324072997791	3
After 7h PQ stress	22	29	0.110417078474007	6
After 7h PQ stress	23	29	0.095359246171967	10
After 7h PQ stress	24	29	0.0663691874119305	5
After 7h PQ stress	25	29	0.164499529685166	4
After 7h PQ stress	26	29	0.0927627000695894	4
After 7h PQ stress	27	29	0.195212187159956	3
After 7h PQ stress	28	29	0.179218013083828	3
After 7h PQ stress	29	29	0.118960107575078	6
After 7h PQ stress	30	29	0.0405990690143696	7
After 7h PQ stress	31	29	0.141114408176723	6
After 7h PQ stress	32	29	0.0782120268101577	7
After 7h PQ stress	33	29	0.0956338213955943	11
After 7h PQ stress	34	29	0.0773560767590618	8
After 7h PQ stress	35	29	0.112182502351834	6
After 7h PQ stress	36	29	0.0782962888464246	7
After 7h PQ stress	1	30	0.0663970588235294	4
After 7h PQ stress	2	30	0.0617905485632866	5
After 7h PQ stress	3	30	0.131047829693116	3
After 7h PQ stress	4	30	0.148096348096348	4
After 7h PQ stress	5	30	0.102027027027027	1
After 7h PQ stress	6	30	0.0468358395989975	4
After 7h PQ stress	7	30	0.163519739813895	3
After 7h PQ stress	8	30	0.0557354925775978	1
After 7h PQ stress	9	30	0.143708750266127	4
After 7h PQ stress	10	30	0.0957789271892068	11
After 7h PQ stress	11	30	0.112654120700844	7
After 7h PQ stress	12	30	0.094176851186197	4
After 7h PQ stress	13	30	0.154354354354354	4
After 7h PQ stress	14	30	0.054282944747717	5
After 7h PQ stress	15	30	0.0862245604319535	7
After 7h PQ stress	16	30	0.10116076610563	3
After 7h PQ stress	17	30	0.0953000790293338	6
After 7h PQ stress	18	30	0.157488693801543	8
After 7h PQ stress	19	30	0.0900677090944517	5
After 7h PQ stress	20	30	0.0520759503114858	5
After 7h PQ stress	21	30	0.0629301868239921	7
After 7h PQ stress	22	30	0.106391830559758	9
After 7h PQ stress	23	30	0.0625867975187483	7
After 7h PQ stress	24	30	0.0749501776275886	6
After 7h PQ stress	25	30	0.0482307533661353	13
After 7h PQ stress	1	31	0.0954666491337651	7
After 7h PQ stress	2	31	0.0776087588411976	2
After 7h PQ stress	3	31	0.0627928267542679	8
After 7h PQ stress	4	31	0.0254653760238273	6
After 7h PQ stress	5	31	0.0744375484871994	5
After 7h PQ stress	6	31	0.0805457559399839	6
After 7h PQ stress	7	31	0.0788540734109221	5
After 7h PQ stress	8	31	0.0508131948911146	6
After 7h PQ stress	9	31	0.149821428571429	1
After 7h PQ stress	10	31	0.097276953730352	12
After 7h PQ stress	11	31	0.10497815519045	2
After 7h PQ stress	12	31	0.0652294557097119	3
After 7h PQ stress	13	31	0.0474972597734746	14
After 7h PQ stress	14	31	0.0638784292630447	11
After 7h PQ stress	15	31	0.0968936678614098	4
After 7h PQ stress	16	31	0.106195335276968	3
After 7h PQ stress	17	31	0.0760263558033452	5
After 7h PQ stress	18	31	0.116416869989543	5
After 7h PQ stress	19	31	0.0577696662693683	11
After 7h PQ stress	20	31	0.0732116244411326	5
After 7h PQ stress	21	31	0.0801457194899818	3
After 7h PQ stress	22	31	0.0857752329628382	4
After 7h PQ stress	23	31	0.121720583007465	4
After 7h PQ stress	24	31	0.164431627012737	4
After 7h PQ stress	25	31	0.0960858708694101	9
After 7h PQ stress	26	31	0.0756616800920598	1
After 7h PQ stress	27	31	0.0572324370283771	3
After 7h PQ stress	28	31	0.078979485093276	5
After 7h PQ stress	29	31	0.0655060489820006	6
After 7h PQ stress	30	31	0.113066796684544	4
After 7h PQ stress	31	31	0.0430391758167277	7
After 7h PQ stress	1	32	0.0647098065376918	1
After 7h PQ stress	2	32	0.0634491634491634	6
After 7h PQ stress	3	32	0.110771992818671	4
After 7h PQ stress	4	32	0.10656540911318	7
After 7h PQ stress	5	32	0.0945686594376739	8
After 7h PQ stress	6	32	0.0579956016336789	4
After 7h PQ stress	7	32	0.101436061089583	3
After 7h PQ stress	8	32	0.0806568731497514	14
After 7h PQ stress	9	32	0.10774261486449	8
After 7h PQ stress	10	32	0.143578643578644	1
After 7h PQ stress	11	32	0.163368669022379	1
After 7h PQ stress	12	32	0.124521276595745	5
After 7h PQ stress	13	32	0.182878617794914	3
After 7h PQ stress	14	32	0.115954664341761	6
After 7h PQ stress	15	32	0.0964155084125823	10
After 7h PQ stress	16	32	0.0849787553111722	3
After 7h PQ stress	17	32	0.0538793782906145	7
After 7h PQ stress	18	32	0.131364653243848	6
After 7h PQ stress	19	32	0.105200265545475	8
After 7h PQ stress	20	32	0.100597907324365	5
After 7h PQ stress	21	32	0.0994404290044299	7
After 7h PQ stress	22	32	0.090280777537797	9
After 7h PQ stress	23	32	0.0857142857142857	5
After 7h PQ stress	24	32	0.193016711652214	2
After 7h PQ stress	25	32	0.107434292866083	10
After 7h PQ stress	26	32	0.108901044256589	5
After 7h PQ stress	27	32	0.115305638919602	6
After 7h PQ stress	28	32	0.105422433893933	7
After 7h PQ stress	29	32	0.102218636546995	2
After 7h PQ stress	30	32	0.101922145049265	6
After 7h PQ stress	31	32	0.0658838071693449	7
After 7h PQ stress	32	32	0.114995449435195	7
After 7h PQ stress	1	33	0.104604220961725	7
After 7h PQ stress	2	33	0.0583907273643541	6
After 7h PQ stress	3	33	0.0904183535762483	11
After 7h PQ stress	4	33	0.111212914485166	5
After 7h PQ stress	5	33	0.111580058032182	2
After 7h PQ stress	6	33	0.104619953172292	4
After 7h PQ stress	7	33	0.157865634503732	1
After 7h PQ stress	8	33	0.10944762463917	5
After 7h PQ stress	9	33	0.137991452991453	7
After 7h PQ stress	10	33	0.125481595637484	4
After 7h PQ stress	11	33	0.0968599926117473	2
After 7h PQ stress	12	33	0.0774446142093201	4
After 7h PQ stress	13	33	0.054283377632386	3
After 7h PQ stress	14	33	0.104359313077939	3
After 7h PQ stress	15	33	0.0822350674373796	3
After 7h PQ stress	16	33	0.0786269567995456	6
After 7h PQ stress	17	33	0.152175904718278	2
After 7h PQ stress	18	33	0.112707535121328	2
After 7h PQ stress	19	33	0.0970149253731343	7
After 7h PQ stress	20	33	0.103581402989979	3
After 7h PQ stress	21	33	0.0254839881662947	5
After 7h PQ stress	22	33	0.10029776674938	10
After 7h PQ stress	23	33	0.050712143928036	7
After 7h PQ stress	24	33	0.16910307234886	3
After 7h PQ stress	25	33	0.0911932418162619	4
After 7h PQ stress	26	33	0.0698579234972678	5
After 7h PQ stress	27	33	0.116737468139337	2
After 7h PQ stress	28	33	0.134622400583729	3
After 7h PQ stress	29	33	0.097719298245614	8
After 7h PQ stress	30	33	0.0931882857245776	8
After 7h PQ stress	31	33	0.0782234271589188	4
After 7h PQ stress	32	33	0.0828540618260244	6
After 7h PQ stress	33	33	0.174827188940092	3
After 7h PQ stress	34	33	0.092967032967033	8
After 7h PQ stress	35	33	0.149585762503836	4
After 7h PQ stress	36	33	0.0643380281690141	8
After 7h PQ stress	37	33	0.121960784313725	6
After 7h PQ stress	38	33	0.115503702041732	4
After 7h PQ stress	39	33	0.0305670407560543	1
After 7h PQ stress	40	33	0.200537371763556	2
After 7h PQ stress	41	33	0.0788938592923953	3
After 7h PQ stress	42	33	0.0280669144981413	1
After 7h PQ stress	43	33	0.0664344364269719	2
After 7h PQ stress	44	33	0.0250110019069972	5
After 7h PQ stress	45	33	0.0503505994118978	5
After 7h PQ stress	46	33	0.148777374054797	2
After 7h PQ stress	47	33	0.0971957527906344	6
After 7h PQ stress	48	33	0.103703703703704	13
After 7h PQ stress	49	33	0.0639089007669068	5
After 7h PQ stress	50	33	0.123125	2
After 7h PQ stress	51	33	0.130533239877069	6
After 7h PQ stress	52	33	0.0654925701706109	5
After 7h PQ stress	53	33	0.097739209865266	10
After 7h PQ stress	54	33	0.0985487450913437	12
After 7h PQ stress	55	33	0.0567446043165468	4
After 7h PQ stress	56	33	0.108623728394298	8
After 7h PQ stress	1	34	0.0578021978021978	7
After 7h PQ stress	2	34	0.0948326917382292	4
After 7h PQ stress	3	34	0.0657614372258199	8
After 7h PQ stress	4	34	0.0982613015399901	2
After 7h PQ stress	5	34	0.0356071964017991	6
After 7h PQ stress	6	34	0.0457352826205926	4
After 7h PQ stress	7	34	0.0385316208168526	7
After 7h PQ stress	8	34	0.0684586308273834	11
After 7h PQ stress	9	34	0.0534043051006083	4
After 7h PQ stress	10	34	0.0258873977606607	2
After 7h PQ stress	11	34	0.051062942892872	5
After 7h PQ stress	12	34	0.0423615897082472	6
After 7h PQ stress	13	34	0.0203866574798363	6
After 7h PQ stress	14	34	0.0637570303712036	5
After 7h PQ stress	1	35	0.290611710827609	1
After 7h PQ stress	2	35	0.125236903949663	4
After 7h PQ stress	3	35	0.0914960339420771	1
After 7h PQ stress	4	35	0.111648873072361	3
After 7h PQ stress	5	35	0.129364278506559	2
After 7h PQ stress	6	35	0.138993710691824	6
After 7h PQ stress	7	35	0.129557522123894	4
After 7h PQ stress	8	35	0.149533590879111	4
After 7h PQ stress	9	35	0.111303294992649	5
After 7h PQ stress	10	35	0.122947554768754	9
After 7h PQ stress	11	35	0.101936799184506	5
After 7h PQ stress	12	35	0.124054054054054	4
After 7h PQ stress	13	35	0.0947263539961569	4
After 7h PQ stress	14	35	0.118325123152709	6
After 7h PQ stress	15	35	0.135161929940516	5
After 7h PQ stress	16	35	0.250691244239631	2
After 7h PQ stress	18	35	0.1298499490118	8
After 7h PQ stress	19	35	0.189722345514622	4
After 7h PQ stress	20	35	0.395202549693869	1
After 7h PQ stress	21	35	0.107477547832878	14
After 7h PQ stress	22	35	0.0737689453493491	4
After 7h PQ stress	23	35	0.0631715210355987	3
After 7h PQ stress	24	35	0.156283648669435	5
After 7h PQ stress	25	35	0.12074369189907	5
After 7h PQ stress	26	35	0.13126717032967	2
After 7h PQ stress	27	35	0.04	3
After 7h PQ stress	28	35	0.1119836400818	4
After 7h PQ stress	29	35	0.0920141820023637	3
After 7h PQ stress	30	35	0.0874643874643874	1
After 7h PQ stress	31	35	0.115584887381933	5
After 7h PQ stress	32	35	0.13232912822444	9
After 7h PQ stress	33	35	0.0894551368934671	4
After 7h PQ stress	34	35	0.0996545071117692	5
After 7h PQ stress	35	35	0.123074687590817	13
After 7h PQ stress	36	35	0.105116317236286	6
After 7h PQ stress	38	35	0.0857601184600197	4
After 7h PQ stress	39	35	0.0741231703949185	6
After 7h PQ stress	40	35	0.130168706582865	4
After 7h PQ stress	41	35	0.106083244397012	4
After 7h PQ stress	42	35	0.172425531914894	3
After 7h PQ stress	43	35	0.127203260315843	5
After 7h PQ stress	44	35	0.122608267343614	11
After 7h PQ stress	45	35	0.0712515489467162	7
After 7h PQ stress	46	35	0.0965082444228904	2
After 7h PQ stress	47	35	0.093448883666275	8
After 7h PQ stress	48	35	0.128378628212239	11
After 7h PQ stress	49	35	0.0991517021042195	6
After 7h PQ stress	50	35	0.0824264673746777	9
After 7h PQ stress	51	35	0.133320895522388	8
After 7h PQ stress	52	35	0.112304570951187	4
After 7h PQ stress	53	35	0.0762860727728984	2
After 7h PQ stress	54	35	0.0796786874038626	8
After 7h PQ stress	55	35	0.0616766467065868	6
After 7h PQ stress	56	35	0.0845397538128048	16
After 7h PQ stress	57	35	0.0801685787871693	2
After 7h PQ stress	58	35	0.114246291824767	5
After 7h PQ stress	1	36	0.0813130386942967	5
After 7h PQ stress	2	36	0.106405973668697	7
After 7h PQ stress	3	36	0.086199313923828	4
After 7h PQ stress	4	36	0.0886850152905199	4
After 7h PQ stress	5	36	0.104507361268403	9
After 7h PQ stress	6	36	0.09411951432426	11
After 7h PQ stress	7	36	0.0464975845410628	2
After 7h PQ stress	8	36	0.11294498381877	2
After 7h PQ stress	9	36	0.0740787923182267	13
After 7h PQ stress	10	36	0.107062479905691	3
After 7h PQ stress	11	36	0.0985607812901568	4
After 7h PQ stress	12	36	0.10636235459993	3
After 7h PQ stress	13	36	0.102107287211082	9
After 7h PQ stress	14	36	0.0696462143223381	2
After 7h PQ stress	15	36	0.090706611931173	5
After 7h PQ stress	16	36	0.0859287054409006	10
After 7h PQ stress	17	36	0.0826048654875652	5
After 7h PQ stress	18	36	0.0991128010139417	7
After 7h PQ stress	19	36	0.110688405797101	6
After 7h PQ stress	20	36	0.0785455829141294	11
After 7h PQ stress	21	36	0.0688879026122242	4
After 7h PQ stress	22	36	0.0832477657349306	6
After 7h PQ stress	23	36	0.0765696784073507	4
After 7h PQ stress	24	36	0.0561123766135156	4
After 7h PQ stress	25	36	0.0974378633953102	5
After 7h PQ stress	26	36	0.0947878787878788	2
After 7h PQ stress	27	36	0.0795403165033911	7
After 7h PQ stress	28	36	0.0783813343055049	4
After 7h PQ stress	29	36	0.0893945940755677	8
After 7h PQ stress	30	36	0.0868165541936372	14
After 7h PQ stress	31	36	0.119953299186502	6
After 7h PQ stress	32	36	0.206009663780954	2
After 7h PQ stress	33	36	0.0846385357164793	4
After 7h PQ stress	34	36	0.0848505234831602	8
After 7h PQ stress	35	36	0.107245276653171	11
After 7h PQ stress	36	36	0.0998838109992254	5
After 7h PQ stress	37	36	0.0423659563768936	3
After 7h PQ stress	38	36	0.0567924981966819	5
After 7h PQ stress	1	37	0.110520612971467	6
After 7h PQ stress	3	37	0.173926610084873	5
After 7h PQ stress	4	37	0.0800485142510612	4
After 7h PQ stress	5	37	0.107474481396115	3
After 7h PQ stress	6	37	0.103420957868203	3
After 7h PQ stress	7	37	0.1457970774288	13
After 7h PQ stress	8	37	0	0
After 7h PQ stress	9	37	0.0837333333333333	2
After 7h PQ stress	10	37	0.00854404803140515	2
After 7h PQ stress	12	37	0.0993983351190967	3
After 7h PQ stress	13	37	0.0540023386839588	5
After 7h PQ stress	14	37	0	0
After 7h PQ stress	15	37	0.0762666666666667	2
After 7h PQ stress	16	37	0.114178168130489	5
After 7h PQ stress	1	38	0.0874131437967432	6
After 7h PQ stress	2	38	0.112612438713663	12
After 7h PQ stress	3	38	0.111119159724737	5
After 7h PQ stress	4	38	0.117081081081081	6
After 7h PQ stress	5	38	0.0798827637814916	4
After 7h PQ stress	6	38	0.149308594433748	1
After 7h PQ stress	7	38	0.0830958230958231	9
After 7h PQ stress	8	38	0.100434928069588	1
After 7h PQ stress	9	38	0.150819672131148	1
After 7h PQ stress	10	38	0.0709238839524676	4
After 7h PQ stress	11	38	0.0332782824112304	4
After 7h PQ stress	12	38	0.0527595884003742	6
After 7h PQ stress	13	38	0.10556494447127	4
After 7h PQ stress	14	38	0.066056407718951	2
After 7h PQ stress	15	38	0.0931806350858928	7
After 7h PQ stress	16	38	0.119105199516324	1
After 7h PQ stress	17	38	0.163652885052249	2
After 7h PQ stress	18	38	0.0843574571385222	2
After 7h PQ stress	19	38	0.114222345439423	8
After 7h PQ stress	20	38	0.0651397673944093	2
After 7h PQ stress	22	38	0.0901753724306996	8
After 7h PQ stress	23	38	0.0873055694932263	6
After 7h PQ stress	24	38	0.10941768511862	5
After 7h PQ stress	25	38	0.0875862068965517	2
After 7h PQ stress	26	38	0.121391792791387	4
After 7h PQ stress	27	38	0.0988254575252663	11
After 7h PQ stress	28	38	0.11613989152796	8
After 7h PQ stress	29	38	0.094408322496749	7
After 7h PQ stress	30	38	0.0333442301405688	2
After 7h PQ stress	31	38	0.0936736497374851	7
After 7h PQ stress	32	38	0.135820612496445	7
After 7h PQ stress	33	38	0.0974843889384478	8
After 7h PQ stress	34	38	0.0979538528515455	3
After 7h PQ stress	35	38	0.111760620442181	3
After 7h PQ stress	36	38	0.108144192256342	3
After 7h PQ stress	37	38	0.174814814814815	3
After 7h PQ stress	38	38	0.105342465753425	3
After 7h PQ stress	39	38	0.0789453860640301	9
After 7h PQ stress	40	38	0.0500950570342205	3
After 7h PQ stress	41	38	0.207344079929958	2
After 7h PQ stress	42	38	0.166295471417966	5
After 7h PQ stress	43	38	0.0818051212710217	6
After 7h PQ stress	44	38	0.109881226291897	6
After 7h PQ stress	45	38	0.113010223991259	1
7h after release from PQ	1	39	0.0552114980135546	4
7h after release from PQ	2	39	0	0
7h after release from PQ	3	39	0	0
7h after release from PQ	4	39	0.108512467755804	1
7h after release from PQ	5	39	0	0
7h after release from PQ	6	39	0	0
7h after release from PQ	7	39	0.00777058279370953	2
7h after release from PQ	8	39	0	0
7h after release from PQ	9	39	0	0
7h after release from PQ	10	39	0	0
7h after release from PQ	11	39	0	0
7h after release from PQ	12	39	0	0
7h after release from PQ	13	39	0	0
7h after release from PQ	14	39	0.00313089723794819	2
7h after release from PQ	15	39	0.0214660703869337	3
7h after release from PQ	16	39	0	0
7h after release from PQ	17	39	0	0
7h after release from PQ	18	39	0.00136595434677028	1
7h after release from PQ	19	39	0	0
7h after release from PQ	20	39	0	0
7h after release from PQ	21	39	0.0625426205552849	3
7h after release from PQ	22	39	0.0993673241533309	5
7h after release from PQ	23	39	0.00276679841897233	2
7h after release from PQ	24	39	0	0
7h after release from PQ	25	39	0	0
7h after release from PQ	26	39	0	0
7h after release from PQ	27	39	0	0
7h after release from PQ	28	39	0	0
7h after release from PQ	29	39	0.151257811248197	1
7h after release from PQ	30	39	0	0
7h after release from PQ	31	39	0	0
7h after release from PQ	32	39	0	0
7h after release from PQ	33	39	0.0882049961370075	2
7h after release from PQ	34	39	0	0
7h after release from PQ	35	39	0.175537572254335	2
7h after release from PQ	36	39	0.0710499747602221	6
7h after release from PQ	37	39	0	0
7h after release from PQ	38	39	0	0
7h after release from PQ	39	39	0	0
7h after release from PQ	40	39	0	0
7h after release from PQ	41	39	0	0
7h after release from PQ	42	39	0.0674881516587678	10
7h after release from PQ	43	39	0.201405152224824	1
7h after release from PQ	44	39	0	0
7h after release from PQ	45	39	0	0
7h after release from PQ	46	39	0.173948374760994	2
7h after release from PQ	47	39	0	0
7h after release from PQ	48	39	0.0485200094719394	4
7h after release from PQ	49	39	0.126940639269406	1
7h after release from PQ	50	39	0.19495143691793	1
7h after release from PQ	51	39	0.0121774833201138	1
7h after release from PQ	52	39	0	0
7h after release from PQ	53	39	0.0613432662088232	2
7h after release from PQ	54	39	0	0
7h after release from PQ	55	39	0	0
7h after release from PQ	56	39	0.0962653166042997	2
7h after release from PQ	57	39	0.122453117080588	1
7h after release from PQ	58	39	0.0870656043397186	9
7h after release from PQ	59	39	0.122104098813986	3
7h after release from PQ	60	39	0.012246536839992	1
7h after release from PQ	61	39	0.0461076898784147	8
7h after release from PQ	62	39	0.00247950409918016	1
7h after release from PQ	63	39	0.00258966722776123	1
7h after release from PQ	64	39	0.10713512733569	4
7h after release from PQ	65	39	0.00422250780246007	1
7h after release from PQ	66	39	0	0
7h after release from PQ	67	39	0	0
7h after release from PQ	68	39	0.0607530467471048	4
7h after release from PQ	69	39	0	0
7h after release from PQ	70	39	0.0315730961645359	2
7h after release from PQ	71	39	0.138964803312629	1
7h after release from PQ	72	39	0	0
7h after release from PQ	73	39	0.0756342398247856	4
7h after release from PQ	74	39	0.149275612280097	3
7h after release from PQ	75	39	0	0
7h after release from PQ	76	39	0	0
7h after release from PQ	77	39	0.0050744083922908	2
7h after release from PQ	78	39	0	0
7h after release from PQ	79	39	0.0864188163884674	1
7h after release from PQ	80	39	0	0
7h after release from PQ	81	39	0.151633038176804	2
7h after release from PQ	82	39	0	0
7h after release from PQ	83	39	0	0
7h after release from PQ	84	39	0	0
7h after release from PQ	85	39	0	0
7h after release from PQ	86	39	0	0
7h after release from PQ	87	39	0.0952143569292124	1
7h after release from PQ	88	39	0.0526484198089987	2
7h after release from PQ	89	39	0	0
7h after release from PQ	90	39	0.199460656842916	1
7h after release from PQ	91	39	0	0
7h after release from PQ	92	39	0.0509764677341097	3
7h after release from PQ	93	39	0	0
7h after release from PQ	94	39	0	0
7h after release from PQ	95	39	0	0
7h after release from PQ	96	39	0	0
7h after release from PQ	97	39	0	0
7h after release from PQ	98	39	0.108715596330275	1
7h after release from PQ	99	39	0	0
7h after release from PQ	1	40	0.0812901268894394	3
7h after release from PQ	2	40	0.107021757558632	1
7h after release from PQ	3	40	0.0544718646354489	3
7h after release from PQ	4	40	0.0515131136516476	2
7h after release from PQ	5	40	0.0656771281669497	3
7h after release from PQ	6	40	0.0342556871092191	8
7h after release from PQ	7	40	0.0606085391787993	2
7h after release from PQ	8	40	0.0557126696832579	2
7h after release from PQ	9	40	0.106292874142517	3
7h after release from PQ	10	40	0.000802755263226041	1
7h after release from PQ	11	40	0.0575238095238095	1
7h after release from PQ	12	40	0.100301758068748	3
7h after release from PQ	13	40	0.0802734375	3
7h after release from PQ	14	40	0.156346069389548	3
7h after release from PQ	15	40	0.0594217879889293	4
7h after release from PQ	16	40	0.0284196928376633	2
7h after release from PQ	17	40	0.0914435009797518	6
7h after release from PQ	18	40	0	0
7h after release from PQ	19	40	0.0479706029731084	5
7h after release from PQ	20	40	0.157319964245463	3
7h after release from PQ	21	40	0.0463727028805751	3
7h after release from PQ	22	40	0.126959022286125	5
7h after release from PQ	23	40	0.0487628940344803	4
7h after release from PQ	24	40	0.108151427263013	2
7h after release from PQ	25	40	0	0
7h after release from PQ	26	40	0.0907047600019979	3
7h after release from PQ	27	40	0.102727475966913	5
7h after release from PQ	28	40	0.114285714285714	4
7h after release from PQ	29	40	0.143732761262642	2
7h after release from PQ	30	40	0.128835992955116	2
7h after release from PQ	31	40	0.0482570682411718	2
7h after release from PQ	32	40	0.14950465325728	2
7h after release from PQ	33	40	0.117226435536295	3
7h after release from PQ	34	40	0	0
7h after release from PQ	35	40	0	0
7h after release from PQ	36	40	0.078569069895432	8
7h after release from PQ	37	40	0.0848332580917424	8
7h after release from PQ	38	40	0.10727988949711	4
7h after release from PQ	39	40	0.08256	4
7h after release from PQ	40	40	0	0
7h after release from PQ	41	40	0.0567730098868617	5
7h after release from PQ	42	40	0	0
7h after release from PQ	43	40	0.0717417469050894	3
7h after release from PQ	44	40	0.0540392156862745	2
7h after release from PQ	45	40	0.0184981011882886	7
7h after release from PQ	46	40	0.0106889676561808	2
7h after release from PQ	47	40	0.176031759881337	1
7h after release from PQ	48	40	0.0516112466298626	2
7h after release from PQ	49	40	0.0486937431394072	3
7h after release from PQ	50	40	0.111364106810184	1
7h after release from PQ	51	40	0.0155812831644959	5
7h after release from PQ	52	40	0.0268497517317477	2
7h after release from PQ	53	40	0.0471094788830494	3
7h after release from PQ	54	40	0.0231777493606138	2
7h after release from PQ	55	40	0	0
7h after release from PQ	56	40	0.0476912231230173	5
7h after release from PQ	1	41	0	0
7h after release from PQ	2	41	0.0408692185007975	1
7h after release from PQ	3	41	0.106573162312416	2
7h after release from PQ	4	41	0.0900986730180334	1
7h after release from PQ	5	41	0.0644385026737968	4
7h after release from PQ	6	41	0	0
7h after release from PQ	7	41	0.0732711901148927	1
7h after release from PQ	8	41	0.0837877671333825	2
7h after release from PQ	9	41	0	0
7h after release from PQ	10	41	0.0736457454925109	2
7h after release from PQ	11	41	0.0711095100864553	7
7h after release from PQ	12	41	0.0969759042639211	3
7h after release from PQ	13	41	0.0731679235507455	3
7h after release from PQ	14	41	0.0482090496176623	7
7h after release from PQ	15	41	0.0586170390594528	3
7h after release from PQ	16	41	0.0839344262295082	8
7h after release from PQ	17	41	0.128621964307007	3
7h after release from PQ	18	41	0.131857555341675	1
7h after release from PQ	19	41	0.0305523400033074	5
7h after release from PQ	20	41	0.0624032643872239	8
7h after release from PQ	21	41	0	0
7h after release from PQ	22	41	0	0
7h after release from PQ	23	41	0.0354319180087848	3
7h after release from PQ	24	41	0.0360409961036761	6
7h after release from PQ	25	41	0.053828108338665	9
7h after release from PQ	26	41	0.0210084033613445	1
7h after release from PQ	27	41	0.058953829730451	8
7h after release from PQ	28	41	0.142281879194631	2
7h after release from PQ	29	41	0.00567589898336746	2
7h after release from PQ	30	41	0	0
7h after release from PQ	31	41	0.00351065255259279	2
7h after release from PQ	32	41	0.0123930099857347	2
7h after release from PQ	33	41	0.246265886048836	1
7h after release from PQ	34	41	0.0441958554923895	2
7h after release from PQ	35	41	0	0
7h after release from PQ	36	41	0.00218456633406152	1
7h after release from PQ	37	41	0.0287299270072993	3
7h after release from PQ	38	41	0.107235859124867	1
7h after release from PQ	39	41	0.0878865380144152	2
7h after release from PQ	40	41	0.141818181818182	1
7h after release from PQ	41	41	0.103377323683837	3
7h after release from PQ	42	41	0.075787546869003	6
7h after release from PQ	43	41	0.00549993325323722	2
7h after release from PQ	44	41	0.112730236348818	5
7h after release from PQ	45	41	0.0606440819740694	4
7h after release from PQ	46	41	0.160112667812854	2
7h after release from PQ	47	41	0.065723743605176	5
7h after release from PQ	48	41	0.193741944086404	1
7h after release from PQ	49	41	0.0713746413650778	3
7h after release from PQ	50	41	0.106663025669033	3
7h after release from PQ	51	41	0.159681573402014	2
7h after release from PQ	52	41	0	0
7h after release from PQ	53	41	0.0908846825077192	1
7h after release from PQ	54	41	0.116874833909115	1
7h after release from PQ	55	41	0.139032258064516	1
7h after release from PQ	56	41	0.0868043264503441	1
7h after release from PQ	57	41	0.051062416998672	3
7h after release from PQ	58	41	0.0830742659758204	7
7h after release from PQ	59	41	0.144635207609539	1
7h after release from PQ	60	41	0.147578558225508	3
7h after release from PQ	61	41	0.00939890710382514	1
7h after release from PQ	62	41	0	0
7h after release from PQ	63	41	0.0549596035032928	4
7h after release from PQ	64	41	0	0
7h after release from PQ	65	41	0.0785498489425982	1
7h after release from PQ	66	41	0.0705123611608742	1
7h after release from PQ	67	41	0.0596977329974811	6
7h after release from PQ	68	41	0.0800710972384792	4
7h after release from PQ	69	41	0.05428891795926	7
7h after release from PQ	70	41	0.0640037688864959	1
7h after release from PQ	71	41	0	0
7h after release from PQ	1	42	0.0698716034637205	4
7h after release from PQ	2	42	0.0983243243243243	1
7h after release from PQ	3	42	0.161398728428701	2
7h after release from PQ	4	42	0.0988466467321657	3
7h after release from PQ	5	42	0.0511653190188218	1
7h after release from PQ	6	42	0.0821280133000831	1
7h after release from PQ	7	42	0.0308632988790217	5
7h after release from PQ	8	42	0.190982503364738	1
7h after release from PQ	9	42	0.119761601319439	2
7h after release from PQ	10	42	0.11868978805395	2
7h after release from PQ	11	42	0.0361806451612903	5
7h after release from PQ	12	42	0.0880962883609553	3
7h after release from PQ	13	42	0.0831652917812404	5
7h after release from PQ	14	42	0	0
7h after release from PQ	15	42	0.215693929338278	1
7h after release from PQ	16	42	0.194370036185911	2
7h after release from PQ	17	42	0	0
7h after release from PQ	18	42	0.00575373993095512	1
7h after release from PQ	19	42	0.187670030715226	4
7h after release from PQ	20	42	0.159642716146861	1
7h after release from PQ	21	42	0	0
7h after release from PQ	22	42	0.0779491454772822	1
7h after release from PQ	23	42	0.00253742704897234	1
7h after release from PQ	24	42	0.094949494949495	1
7h after release from PQ	25	42	0.172631072631073	2
7h after release from PQ	26	42	0	0
7h after release from PQ	27	42	0	0
7h after release from PQ	28	42	0.156618610747051	1
7h after release from PQ	29	42	0.15015092712376	2
7h after release from PQ	30	42	0.0522406058559645	3
7h after release from PQ	31	42	0.0959463237349734	1
7h after release from PQ	32	42	0.0914839367669556	2
7h after release from PQ	33	42	0.0781499202551834	4
7h after release from PQ	34	42	0.0912904021712312	3
7h after release from PQ	35	42	0.114726771995941	6
7h after release from PQ	36	42	0.111982044198895	3
7h after release from PQ	37	42	0.114742341973158	2
7h after release from PQ	38	42	0.052110521105211	4
7h after release from PQ	39	42	0.142247943953701	1
7h after release from PQ	40	42	0.106859592711683	1
7h after release from PQ	41	42	0.013524760715772	3
7h after release from PQ	42	42	0.0940220884707532	1
7h after release from PQ	43	42	0.139860712822614	4
7h after release from PQ	44	42	0	0
7h after release from PQ	45	42	0.159272727272727	2
7h after release from PQ	46	42	0.156247409004229	4
7h after release from PQ	47	42	0.0311854829946757	2
7h after release from PQ	48	42	0.0709041095890411	2
7h after release from PQ	49	42	0.122185903043138	1
7h after release from PQ	50	42	0.0616682895163908	5
7h after release from PQ	51	42	0.134817408704352	2
7h after release from PQ	52	42	0.161270892937811	1
7h after release from PQ	53	42	0.127300186797027	1
7h after release from PQ	54	42	0.0597283774124375	6
7h after release from PQ	55	42	0.118924173687622	2
7h after release from PQ	56	42	0	0
7h after release from PQ	57	42	0	0
7h after release from PQ	58	42	0.0209631989656924	2
7h after release from PQ	59	42	0.0921212567682051	4
7h after release from PQ	60	42	0.0472222222222222	7
7h after release from PQ	61	42	0.0936745886654479	3
7h after release from PQ	62	42	0.135545781687325	3
7h after release from PQ	63	42	0.0520748100526008	8
7h after release from PQ	64	42	0.16229911683799	2
7h after release from PQ	65	42	0.00842306011363185	4
7h after release from PQ	66	42	0	0
7h after release from PQ	67	42	0.0667792032410533	6
7h after release from PQ	68	42	0.12803548605368	1
7h after release from PQ	69	42	0.0672958257713249	6
7h after release from PQ	70	42	0.0241992882562278	3
7h after release from PQ	71	42	0.204508110385507	3
7h after release from PQ	72	42	0.08096389560577	3
7h after release from PQ	73	42	0.0290545263893743	3
7h after release from PQ	74	42	0.0147247119078105	3
7h after release from PQ	75	42	0.0539778070340418	3
7h after release from PQ	76	42	0.105751573976915	10
7h after release from PQ	77	42	0.00175467099918765	1
7h after release from PQ	78	42	0.0914850657940542	2
7h after release from PQ	79	42	0.123096129837703	1
7h after release from PQ	80	42	0.113728376886272	1
7h after release from PQ	81	42	0.11125662613034	3
7h after release from PQ	82	42	0.114905362776025	1
7h after release from PQ	83	42	0.0423609441027931	3
7h after release from PQ	84	42	0.0793006204173717	3
7h after release from PQ	85	42	0.0970304975922954	2
7h after release from PQ	86	42	0.152594490711083	1
7h after release from PQ	87	42	0.136254755530506	1
7h after release from PQ	88	42	0.131748933577087	4
7h after release from PQ	89	42	0.0746756909193458	1
7h after release from PQ	90	42	0.0940381486168866	5
7h after release from PQ	92	42	0	0
7h after release from PQ	93	42	0.0352654057352044	2
7h after release from PQ	94	42	0	0
7h after release from PQ	95	42	0.110788177339901	3
7h after release from PQ	96	42	0	0
7h after release from PQ	97	42	0.00163925757495637	1
7h after release from PQ	98	42	0	0
7h after release from PQ	99	42	0.14727226775463	2
7h after release from PQ	100	42	0.0544628222321562	6
7h after release from PQ	101	42	0.124599390291566	3
7h after release from PQ	102	42	0.0946852619675839	4
7h after release from PQ	103	42	0.100681818181818	2
7h after release from PQ	104	42	0.188248337028825	1
7h after release from PQ	105	42	0.0228696285506191	2
7h after release from PQ	106	42	0.117964166798795	2
7h after release from PQ	107	42	0.0654964894684052	7
[truncated: 578 more rows]
