# Supplementary material for: Genetically controlled mtDNA deletions prevent ROS damage by arresting oxidative phosphorylation
Source: eLife. 2022 Jul 8;11:e76095. doi: 10.7554/eLife.76095 (PMC9427111; doi:10.7554/eLife.76095)
Supplement: Figure 2—source data 4. — Data are shown in Figure 2C. [file elife-76095-fig2-data4.xlsx]

## Sheet: Data S24 - ATG32 mut. adapt.
README: Founder: WT, geneX∆::KanMX
Strain	Environment	Batch Cycle	N	Relative doubling time	Relative doubling time S.D	Generations
Founder	Paraquat	1	32	0.40974131527792995	0.22782152819572843	5.253544438055316
Founder	Paraquat	2	32	-0.1992738960448547	0.36241938992001344	11.775486281748453
Founder	Paraquat	11	32	-0.7403243690043935	0.390433463052756	79.61445654333534
Founder	Paraquat	3	32	-0.511678363738445	0.2576784650201266	18.829834600966677
Founder	Paraquat	4	32	-0.8288833723404333	0.45774933326089695	26.489100023098864
Founder	Paraquat	5	32	-0.9928406054248916	0.4077763867133036	34.55660886359276
Founder	Paraquat	6	32	-0.966218729781647	0.28471615872109723	42.441395320948374
Founder	Paraquat	7	32	-0.8862982380734884	0.48763649971798617	50.08592549401901
Founder	Paraquat	8	32	-0.8021485696858227	0.3677055394018781	57.54322024670094
Founder	Paraquat	9	32	-0.7294159399389974	0.3112670002738634	64.80901184633608
Founder	Paraquat	10	32	-0.7936713450195101	0.4089361599789767	72.24704978013477
Founder	Paraquat	0	32	0.40974131527792995	0.22782152819572843	5.253544438055316
atg32∆	Paraquat	1	16	0.18314091790900233	0.2202404073660293	5.620587454967515
atg32∆	Paraquat	2	16	-0.21869866933429	0.4532006882541014	12.086076649845872
atg32∆	Paraquat	11	16	-0.7494600462169568	0.26384658372228437	78.56693495673696
atg32∆	Paraquat	3	16	-0.44157592054241945	0.35880818132114456	18.934279896275147
atg32∆	Paraquat	4	16	-0.7933280725041241	0.29602334503239297	26.55483308948041
atg32∆	Paraquat	5	15	-0.9769589893544718	0.2999324600801351	34.30755222713029
atg32∆	Paraquat	6	16	-0.9309088772138542	0.23870723326945872	41.79783782101074
atg32∆	Paraquat	7	16	-0.8845558300685946	0.3390086130732876	49.49153194021188
atg32∆	Paraquat	8	16	-0.7108408296081907	0.3428229784079897	57.004396890423834
atg32∆	Paraquat	9	16	-0.7695270562066123	0.21891828209624975	64.13925686636244
atg32∆	Paraquat	10	16	-0.7130592353410088	0.29053966382259305	71.3649287391438
atg32∆	Paraquat	0	16	0.18314091790900233	0.2202404073660293	5.620587454967515
