# Supplementary material for: Genetically controlled mtDNA deletions prevent ROS damage by arresting oxidative phosphorylation
Source: eLife. 2022 Jul 8;11:e76095. doi: 10.7554/eLife.76095 (PMC9427111; doi:10.7554/eLife.76095)
Supplement: Figure 3—figure supplement 2—source data 1. — Data are shown in Figure 3—figure supplement 2B and Figure 6A. [file elife-76095-fig3-figsupp2-data1.xlsx]

## Sheet: Data S7 - Relaxation resp.
Ancestral batch cycle t	Generations of selection Gs	Environment	Batch Cycle tR	N	Generation time Dnorm	SD Dnorm	SEM Dnorm	Generations of relaxation GR
1	6	Paraquat	0	15	-0.422678882646633	0.0925848246629235	0.0239052989354024	0
1	6	Paraquat	7	15	-0.0168659225921103	0.177430052632018	0.0458122425973673	58.6560023916277
1	6	Glycerol	3	14	0.122274906131276	0.0850131200679302	0.0227207120482051	25.138286739269
1	6	Paraquat	5	15	-0.0222312007852808	0.181684030291811	0.0469106149061353	41.8971445654483
1	6	Glycerol	10	14	0.053665344862643	0.143330773754122	0.0383067605977953	83.7942891308967
1	6	Paraquat	1	15	-0.444467309218984	0.111116436973844	0.028690140659307	8.37942891308967
1	6	Paraquat	10	15	0.0397910211424278	0.190334793908395	0.0491442324674022	83.7942891308967
1	6	Paraquat	8	15	-0.00563116405807193	0.169688459499689	0.0438133718457257	67.0354313047173
1	6	Glycerol	4	14	0.0328302286889717	0.125635427911004	0.0335774804916938	33.5177156523587
1	6	Paraquat	6	15	-0.0441975591274242	0.136326717969379	0.0351994072225681	50.276573478538
1	6	Paraquat	2	15	-0.0575174073703703	0.185060014502562	0.047782290281155	16.7588578261793
1	6	Glycerol	0	15	0.338382579330671	0.126065211038164	0.0325498975257956	0
1	6	Paraquat	9	15	0.0264530590180094	0.171971035904546	0.044402730539223	75.414860217807
1	6	Glycerol	5	14	0.0935656687212847	0.144351916129383	0.0385796723771769	41.8971445654483
1	6	Glycerol	6	14	0.084277330135745	0.102797003362227	0.0274736547834644	50.276573478538
1	6	Paraquat	3	15	-0.0407046211936066	0.148542770702331	0.038353578475309	25.138286739269
1	6	Glycerol	8	14	0.0639749342142325	0.121598078272162	0.0324984534131823	67.0354313047173
1	6	Glycerol	7	14	0.106835033953807	0.152841483968579	0.0408486048211804	58.6560023916277
1	6	Paraquat	4	15	-0.0909374338752377	0.145140904561616	0.0374752204147078	33.5177156523587
1	6	Glycerol	9	14	0.149422230210326	0.197122026693584	0.0526830776624214	75.414860217807
1	6	Glycerol	1	15	0.330928737966859	0.263387134067483	0.0680062655899108	8.37942891308967
1	6	Glycerol	2	15	0.19651384048581	0.15706758553941	0.040554676201543	16.7588578261793
2	11	Glycerol	3	10	0.11015154859564	0.0871763307789462	0.0275675763317711	25.138286739269
2	11	Glycerol	4	10	0.128382589852855	0.120993841081095	0.038261612066871	33.5177156523587
2	11	Paraquat	4	15	-0.214646536898156	0.232003613434841	0.0599030754062055	33.5177156523587
2	11	Paraquat	3	15	-0.189193234114279	0.231021231877053	0.0596494255786765	25.138286739269
2	11	Paraquat	0	15	-0.418234302524566	0.0530763270984072	0.0137042487286659	0
2	11	Paraquat	7	15	-0.132990509902912	0.228341295083979	0.0589574688741122	58.6560023916277
2	11	Glycerol	1	11	0.45365480863578	0.359718098756217	0.108459087624944	8.37942891308967
2	11	Paraquat	1	15	-0.468265525068267	0.118806567984712	0.0306757239483233	8.37942891308967
2	11	Paraquat	10	15	-0.148167649366076	0.246757286940548	0.0637124575250712	83.7942891308967
2	11	Paraquat	8	15	-0.173367131746828	0.198531009355025	0.0512604861958508	67.0354313047173
2	11	Glycerol	0	15	0.450952584088256	0.0971794754216259	0.0250916326600753	0
2	11	Glycerol	2	12	0.18096219932293	0.147233507079747	0.0425026524731124	16.7588578261793
2	11	Paraquat	2	15	-0.116342809978601	0.173474992729596	0.0447910505216786	16.7588578261793
2	11	Paraquat	5	15	-0.157152007269344	0.243324223873084	0.06282604445262	41.8971445654483
2	11	Paraquat	9	15	-0.129253850310477	0.258610324138444	0.0667728985696998	75.414860217807
2	11	Glycerol	5	10	0.0413605828208866	0.0720248248493685	0.0227762494598698	41.8971445654483
2	11	Glycerol	8	10	0.0755122202174898	0.0476182316083824	0.0150582070031911	67.0354313047173
2	11	Glycerol	6	10	0.0799813537459332	0.113894516967393	0.0360166086621654	50.276573478538
2	11	Glycerol	10	10	0.0614699169277464	0.093589988881278	0.0295957531054672	83.7942891308967
2	11	Glycerol	9	10	0.0921110634605069	0.109850905458391	0.034737906428034	75.414860217807
2	11	Paraquat	6	15	-0.147028852660239	0.231634850407556	0.0598078612019807	50.276573478538
2	11	Glycerol	7	10	0.0913084033603285	0.0603290032284651	0.0190777059169601	58.6560023916277
3	15	Paraquat	7	15	-0.048776724433424	0.172974760310336	0.04466189106641	58.6560023916277
3	15	Paraquat	8	15	-0.0733313746736041	0.178343775978926	0.0460481649510752	67.0354313047173
3	15	Glycerol	6	14	0.0734000051310665	0.117091017292304	0.0312938906983303	50.276573478538
3	15	Glycerol	7	14	0.0691422679777825	0.14346664465416	0.0383430736232792	58.6560023916277
3	15	Glycerol	5	14	0.0803648701296091	0.11920272581293	0.03185826854011	41.8971445654483
3	15	Glycerol	3	15	0.102623903700785	0.117941790717967	0.0304524394181711	25.138286739269
3	15	Paraquat	3	16	-0.129673401991811	0.15259521535414	0.0381488038385351	25.138286739269
3	15	Paraquat	1	16	-0.463614897195426	0.10694904610927	0.0267372615273176	8.37942891308967
3	15	Glycerol	8	14	0.0192056764870088	0.070109960708649	0.0187376751694248	67.0354313047173
3	15	Glycerol	4	15	0.0711841117451593	0.212235053059605	0.0547988550654199	33.5177156523587
3	15	Paraquat	6	15	-0.145647743304859	0.152697578754286	0.0394263453014363	50.276573478538
3	15	Paraquat	4	16	-0.238873286083849	0.201800519899675	0.0504501299749189	33.5177156523587
3	15	Paraquat	2	16	-0.136520162631916	0.149706183399797	0.0374265458499493	16.7588578261793
3	15	Glycerol	9	14	0.108964178198942	0.12250221938257	0.0327400952892138	75.414860217807
3	15	Paraquat	0	16	-0.426738872336702	0.0725639707276243	0.0181409926819061	0
3	15	Paraquat	5	15	-0.149737433106678	0.176701363826655	0.0456240959568516	41.8971445654483
3	15	Glycerol	1	14	0.359981693015502	0.373422046092812	0.0998012397962436	8.37942891308967
3	15	Glycerol	10	14	0.0777337672644121	0.1006799125736	0.0269078384700546	83.7942891308967
3	15	Paraquat	10	15	-0.0268725057679887	0.180533554879093	0.0466135634318901	83.7942891308967
3	15	Glycerol	2	16	0.237832977271466	0.163075087784243	0.0407687719460608	16.7588578261793
3	15	Glycerol	0	16	0.316024540731768	0.181511959006031	0.0453779897515078	0
3	15	Paraquat	9	15	-0.0498301084278201	0.177288281891944	0.0457756375496818	75.414860217807
30	144	Paraquat	0	15	-0.407250372487778	0.106255437119201	0.027435035893777	0
30	144	Paraquat	3	15	-0.33131654630362	0.0990686853109675	0.0255794245560027	25.138286739269
30	144	Paraquat	10	15	-0.397261826330588	0.104008131660471	0.0268547841194101	83.7942891308967
30	144	Glycerol	8	0	NA	NA	NA	67.0354313047173
30	144	Paraquat	8	15	-0.379331948987074	0.120030260838478	0.0309916800845573	67.0354313047173
30	144	Paraquat	1	15	-0.424697410325293	0.105265293751259	0.0271793819754839	8.37942891308967
30	144	Paraquat	4	15	-0.44690441279843	0.121845956802644	0.0314604907666233	33.5177156523587
30	144	Paraquat	2	15	-0.345618589390709	0.136238061196765	0.0351765161423106	16.7588578261793
30	144	Glycerol	0	0	NA	NA	NA	0
30	144	Paraquat	9	15	-0.37724173428312	0.126677003764331	0.0327078617284473	75.414860217807
30	144	Paraquat	7	15	-0.386609827523785	0.111887990097246	0.0288893548191503	58.6560023916277
30	144	Paraquat	5	15	-0.394960378114118	0.106198817959457	0.0274204168895926	41.8971445654483
30	144	Glycerol	1	0	NA	NA	NA	8.37942891308967
30	144	Glycerol	10	0	NA	NA	NA	83.7942891308967
30	144	Glycerol	6	0	NA	NA	NA	50.276573478538
30	144	Paraquat	6	15	-0.393077711798264	0.123115480156633	0.0317882802871313	50.276573478538
30	144	Glycerol	2	0	NA	NA	NA	16.7588578261793
30	144	Glycerol	9	0	NA	NA	NA	75.414860217807
30	144	Glycerol	7	0	NA	NA	NA	58.6560023916277
30	144	Glycerol	5	0	NA	NA	NA	41.8971445654483
30	144	Glycerol	3	0	NA	NA	NA	25.138286739269
30	144	Glycerol	4	0	NA	NA	NA	33.5177156523587
9	42	Paraquat	1	15	-0.456652355457695	0.0724618610223294	0.0187095720649785	8.37942891308967
9	42	Glycerol	4	0	NA	NA	NA	33.5177156523587
9	42	Paraquat	2	15	-0.377536031473548	0.0801965720364863	0.020706665861349	16.7588578261793
9	42	Glycerol	5	0	NA	NA	NA	41.8971445654483
9	42	Glycerol	3	0	NA	NA	NA	25.138286739269
9	42	Glycerol	1	0	NA	NA	NA	8.37942891308967
9	42	Paraquat	3	15	-0.373563263281688	0.111517469755602	0.0287936868783089	25.138286739269
9	42	Glycerol	10	0	NA	NA	NA	83.7942891308967
9	42	Glycerol	8	0	NA	NA	NA	67.0354313047173
9	42	Glycerol	6	0	NA	NA	NA	50.276573478538
9	42	Glycerol	2	0	NA	NA	NA	16.7588578261793
9	42	Paraquat	4	15	-0.491785664649367	0.0752272825281848	0.0194236008274733	33.5177156523587
9	42	Glycerol	9	0	NA	NA	NA	75.414860217807
9	42	Paraquat	0	15	-0.442055876983873	0.115174603110516	0.029737954650205	0
9	42	Paraquat	5	15	-0.444209265733564	0.109115403460347	0.0281734760277752	41.8971445654483
9	42	Paraquat	9	15	-0.443693969931199	0.171973842517866	0.044403455203666	75.414860217807
9	42	Paraquat	10	15	-0.438697620164238	0.0922492267505068	0.023818647927015	83.7942891308967
9	42	Paraquat	8	15	-0.456951294554253	0.109084146131184	0.0281654054200887	67.0354313047173
9	42	Paraquat	6	15	-0.418319378830887	0.100401785969492	0.025923629665955	50.276573478538
9	42	Glycerol	0	0	NA	NA	NA	0
9	42	Paraquat	7	15	-0.434610437438121	0.12587941448821	0.0325019250628785	58.6560023916277
9	42	Glycerol	7	0	NA	NA	NA	58.6560023916277
0	0	Paraquat	1	14	0.181578332979843	0.106270716400059	0.0284020436440029	8.37942891308967
0	0	Paraquat	6	14	0.094957856658027	0.0874424954461979	0.0233699899288724	50.276573478538
0	0	Paraquat	7	14	0.0766820609499049	0.100833205576701	0.0269488077484399	58.6560023916277
0	0	Paraquat	5	14	0.101519609025458	0.0754296730646691	0.0201594281003116	41.8971445654483
0	0	Paraquat	3	14	0.00507605407034233	0.0984722102965821	0.026317805217726	25.138286739269
0	0	Glycerol	8	14	0.0115359784695923	0.077105073476051	0.0206071976949581	67.0354313047173
0	0	Paraquat	8	14	0.0668841591101479	0.0991166734797035	0.0264900452484138	67.0354313047173
0	0	Glycerol	10	14	0.038108461015922	0.101861943509428	0.027223749525943	83.7942891308967
0	0	Paraquat	4	14	0.0588467974601392	0.085741477015832	0.0229153736306569	33.5177156523587
0	0	Paraquat	2	14	0.195745195416893	0.182076202064239	0.0486619118863861	16.7588578261793
0	0	Glycerol	9	14	0.0773541150589351	0.123538270155008	0.0330169915053401	75.414860217807
0	0	Glycerol	4	14	0.0472480689862729	0.0966199104448804	0.025822757258966	33.5177156523587
0	0	Paraquat	9	14	0.10014345390952	0.097525495698215	0.0260647850984298	75.414860217807
0	0	Glycerol	5	14	0.00550112276945598	0.104171063750558	0.0278408878693124	41.8971445654483
0	0	Glycerol	3	14	0.0377385927605582	0.0770709987017358	0.0205980908284568	25.138286739269
0	0	Glycerol	1	14	0.0218060011080658	0.107045724597972	0.0286091732974693	8.37942891308967
0	0	Paraquat	10	14	0.106262204981589	0.107147230170674	0.0286363018028906	83.7942891308967
0	0	Glycerol	6	14	-0.0177531722183376	0.119954879239606	0.0320592899990319	50.276573478538
0	0	Glycerol	2	14	0.0638195083290751	0.0941830938012457	0.0251714906164753	16.7588578261793
0	0	Glycerol	7	14	0.0429202370216669	0.108413365774289	0.0289746907767424	58.6560023916277
