# Supplementary material for: Genetically controlled mtDNA deletions prevent ROS damage by arresting oxidative phosphorylation
Source: eLife. 2022 Jul 8;11:e76095. doi: 10.7554/eLife.76095 (PMC9427111; doi:10.7554/eLife.76095)
Supplement: Figure 3—figure supplement 3—source data 1. — Data are shown in Figure 3—figure supplement 3B. [file elife-76095-fig3-figsupp3-data1.xlsx]

## Sheet: menadione_2022_data.csv
Batch cycle	mM menadione	Doubling time Dnorm	S.D Doubling time Dnorm	S.E.M Doubling time Dnorm	n	Generations of selection G
0	0	-0.00395431134950104	0.0553679615277063	0.00282548445501938	379	2.24375331130926
1	0	-0.0835621503671816	0.145114138191322	0.014810649709686	82	6.38654180303279
2	0	-0.0315933486375582	0.164096913628627	0.0118426746570844	186	10.5549841998966
3	0	-0.0600578487178454	0.16038620809537	0.0115748775522706	160	14.8672028140925
4	0	-0.0259622339068315	0.163511986891448	0.0118004612059385	179	19.3400367296115
5	0	0.0669225041179998	0.133500840009947	0.0136253724273876	93	23.6590112008122
7	0	0.0115431336760146	0.224876735037629	0.0162290804385574	156	32.8318778157682
50	0	0.363141997822746	0.180883389872957	0.0130541342293854	192	241.854963346778
0	0.25	-0.0248573535785657	0.252271433849929	0.0128736727002627	355	2.24375331130926
1	0.25	-3.67810009809928	0.510823761006533	0.0521357317898095	65	6.38654180303279
2	0.25	-3.66654451860761	0.313398412739962	0.0226175822448773	163	10.5549841998966
3	0.25	-3.47778758018618	0.956193912492095	0.0690073515968491	134	14.8672028140925
4	0.25	-3.61054605175085	0.671605115499337	0.048468924277834	151	19.3400367296115
5	0.25	-3.58751737744901	0.501918858922125	0.0512268790266326	92	23.6590112008122
7	0.25	-3.62544497810749	0.574129390604977	0.0414342197769324	133	32.8318778157682
50	0.25	-3.49782896753122	0.398024027277598	0.0287249099115825	192	241.854963346778
