# Supplementary material for: Genetically controlled mtDNA deletions prevent ROS damage by arresting oxidative phosphorylation
Source: eLife. 2022 Jul 8;11:e76095. doi: 10.7554/eLife.76095 (PMC9427111; doi:10.7554/eLife.76095)
Supplement: Figure 3—source data 1. — Data are shown in Figure 3C. [file elife-76095-fig3-data1.xlsx]

## Sheet: Data S3 - Glyc. PQ phenotypes
README: If less than 10% of populations grow = No growth
Environment	Batch cycle t	N	Generation time Dnorm	SD Dnorm	SEM Dnorm	Generations of selection G
Paraquat	0	96	0.0798104137775394	0.0654011599676883	0.0066749779377906	2.24375331130926
Glycerol	0	96	0.00925204895146492	0.0912203794441538	0.00931014099088518	2.24375331130926
Paraquat	1	96	-0.363008511916729	0.0804657884226947	0.008212505141098	6.38654180303279
Glycerol	1	96	0.378472133274253	0.136652116543325	0.0139469982417702	6.38654180303279
Paraquat	2	96	-0.372801857461054	0.0860744351689193	0.00878493525258848	10.5549841998966
Glycerol	2	93	0.457315723728537	0.183923960739942	0.0190720262790815	10.5549841998966
Paraquat	3	96	-0.384088349800257	0.0758074384370274	0.00773706428659024	14.8672028140925
Glycerol	3	91	0.37580874072674	0.192363903997868	0.0201652163693596	14.8672028140925
Paraquat	4	96	-0.472781558762015	0.100670256688912	0.0102746150484517	19.3400367296115
Glycerol	4	75	0.453986363188466	0.232484774368842	0.026845029412868	19.3400367296115
Paraquat	5	96	-0.414041390746309	0.0815771540059397	0.00832593341595804	23.6590112008122
Glycerol	5	33	0.753415658962078	0.250440981741115	0.043596179056737	23.6590112008122
Paraquat	7	96	-0.495080106231534	0.124606377046298	0.0127175851025117	32.8318778157682
Glycerol	7	29	0.614089458962545	0.290419596445805	0.0539295651752466	32.8318778157682
Paraquat	9	96	-0.421929183802637	0.0799127108663618	0.0081560568993813	41.9577935913426
Glycerol	9	5	0.854742369658662	0.752257216987907	0.336419654749954	41.9577935913426
Paraquat	15	96	-0.449406995467212	0.135170650066874	0.0137957967026726	70.4527575723463
Glycerol	15	6	0.754768313911097	0.832934709392198	0.340044171177379	70.4527575723463
Paraquat	20	96	-0.422572549871423	0.106614406831245	0.0108812873319187	95.1245547779462
Glycerol	20	3	0.244073358197008	0.459274291750227	0.265162135973868	95.1245547779462
Paraquat	30	96	-0.396827129886497	0.158717440817444	0.0161990309701302	143.829012498426
Paraquat	50	96	-0.433482717056841	0.212727467673559	0.0217114062531093	241.854963346778
Glycerol	50	2	0.116879026439116	0.42849589024768	0.302992349704701	241.854963346778
