# Supplementary material for: Genetically controlled mtDNA deletions prevent ROS damage by arresting oxidative phosphorylation
Source: eLife. 2022 Jul 8;11:e76095. doi: 10.7554/eLife.76095 (PMC9427111; doi:10.7554/eLife.76095)
Supplement: Figure 3—source data 2. — Data are shown in Figure 3A. [file elife-76095-fig3-data2.xlsx]

## Sheet: Data S14 - Time res. mtDNA cov.
Chromosome	Population	Batch cycle t	Window coverage	Window start	Window end	Log2 coverage mean
chrMT	A8	1	103.248	1	1000	0.455717810513371
chrMT	A8	1	32.408	1001	2000	-1.21597412994441
chrMT	A8	1	34.065	2001	3000	-1.14403391331544
chrMT	A8	1	70.847	3001	4000	-0.0876173562360176
chrMT	A8	1	317.996	4001	5000	2.07861259309403
chrMT	A8	1	233.756	5001	6000	1.63460737107534
chrMT	A8	1	74.067	6001	7000	-0.0234932164258341
chrMT	A8	1	187.558	7001	8000	1.31694077507104
chrMT	A8	1	165.006	8001	9000	1.13212245996108
chrMT	A8	1	80.772	9001	10000	0.101531142425675
chrMT	A8	1	74.36	10001	11000	-0.0177973498240023
chrMT	A8	1	131.199	11001	12000	0.80136069856883
chrMT	A8	1	90.832	12001	13000	0.270876526644031
chrMT	A8	1	79.666	13001	14000	0.081640019478471
chrMT	A8	1	107.045	14001	15000	0.507821384787491
chrMT	A8	1	123.922	15001	16000	0.719036308155169
chrMT	A8	1	74.473	16001	17000	-0.0156066451960582
chrMT	A8	1	289.733	17001	18000	1.94432798880664
chrMT	A8	1	72.025	18001	19000	-0.0638263646962511
chrMT	A8	1	162.736	19001	20000	1.1121374100596
chrMT	A8	1	36.983	20001	21000	-1.02546186154874
chrMT	A8	1	167.23	21001	22000	1.15143765577045
chrMT	A8	1	92.2	22001	23000	0.292442630573217
chrMT	A8	1	50.68	23001	24000	-0.570907595602674
chrMT	A8	1	355.819	24001	25000	2.24074752440461
chrMT	A8	1	269.621	25001	26000	1.8405368430467
chrMT	A8	1	223.826	26001	27000	1.57198160670724
chrMT	A8	1	155.535	27001	28000	1.04684324097948
chrMT	A8	1	31.762	28001	29000	-1.24502236064726
chrMT	A8	1	43.935	29001	30000	-0.776953426142961
chrMT	A8	1	81.539	30001	31000	0.115166143540655
chrMT	A8	1	71.599	31001	32000	-0.0723846821046538
chrMT	A8	1	22.157	32001	33000	-1.76456156261646
chrMT	A8	1	49.063	33001	34000	-0.617688668640067
chrMT	A8	1	7.968	34001	35000	-3.24003456756277
chrMT	A8	1	70.154	35001	36000	-0.101798755143664
chrMT	A8	1	105.083	36001	37000	0.481133268278815
chrMT	A8	1	81.071	37001	38000	0.106861818550042
chrMT	A8	1	523.117	38001	39000	2.79673762958038
chrMT	A8	1	1227.46	39001	40000	4.0272080810016
chrMT	A8	1	1376.825	40001	41000	4.19287726847154
chrMT	A8	1	179.475	41001	42000	1.25338687240353
chrMT	A8	1	299.323	42001	43000	1.99130711468794
chrMT	A8	1	410.408	43001	44000	2.44666282818718
chrMT	A8	1	267.841	44001	45000	1.83098079420302
chrMT	A8	1	215.651	45001	46000	1.51830238084683
chrMT	A8	1	203.329	46001	47000	1.43341997047282
chrMT	A8	1	199.709	47001	48000	1.40750332492782
chrMT	A8	1	1271.368	48001	49000	4.07791375143738
chrMT	A8	1	187.725	49001	50000	1.31822476655337
chrMT	A8	1	386.398	50001	51000	2.35969160159469
chrMT	A8	1	362.382	51001	52000	2.26711527137204
chrMT	A8	1	166.324	52001	53000	1.14360033454809
chrMT	A8	1	258.191	53001	54000	1.77804268698605
chrMT	A8	1	591.486	54001	55000	2.97394799633873
chrMT	A8	1	408.688	55001	56000	2.44060385801124
chrMT	A8	1	403.167	56001	57000	2.42098153109236
chrMT	A8	1	518.662	57001	58000	2.78439864869124
chrMT	A8	1	388.578	58001	59000	2.3678081974241
chrMT	A8	1	281.923	59001	60000	1.90490515627006
chrMT	A8	1	1685.128	60001	61000	4.48439025038925
chrMT	A8	1	1066.56	61001	62000	3.82449719736676
chrMT	A8	1	293.509	62001	63000	1.96300871683395
chrMT	A8	1	237.564	63001	64000	1.6579202042254
chrMT	A8	1	94.205	64001	65000	0.323479513894356
chrMT	A8	1	60.519	65001	66000	-0.314935971042282
chrMT	A8	1	62.893	66001	67000	-0.259424666208437
chrMT	A8	1	56.214	67001	68000	-0.421394644167961
chrMT	A8	1	131.822	68001	69000	0.808195139099122
chrMT	A8	1	89.601	69001	70000	0.251190713618784
chrMT	A8	1	173.895	70001	71000	1.20782042626066
chrMT	A8	1	49.255	71001	72000	-0.612053936445115
chrMT	A8	1	69.887	72001	73000	-0.107300001816569
chrMT	A8	1	55.734	73001	74000	-0.433766421481893
chrMT	A8	1	73.68	74001	75000	-0.0310510586521482
chrMT	A8	1	91.235	75001	76000	0.277263263955076
chrMT	A8	1	8.601	76001	77000	-3.12974780966917
chrMT	A8	15	0.01	1	1000	-12.9948307202306
chrMT	A8	15	0.231	1001	2000	-8.4650097737019
chrMT	A8	15	0.122	2001	3000	-9.38602147755507
chrMT	A8	15	3.176	3001	4000	-4.683763617975
chrMT	A8	15	0.557	4001	5000	-7.19522529777793
chrMT	A8	15	0.191	5001	6000	-8.73932998708221
chrMT	A8	15	0.656	6001	7000	-6.95920681049987
chrMT	A8	15	0.138	7001	8000	-9.20823435833979
chrMT	A8	15	0.303	8001	9000	-8.07358483164501
chrMT	A8	15	0.232	9001	10000	-8.45877781999039
chrMT	A8	15	0.01	10001	11000	-12.9948307202306
chrMT	A8	15	0.306	11001	12000	-8.05937097242531
chrMT	A8	15	0.344	12001	13000	-7.89049406041586
chrMT	A8	15	0.271	13001	14000	-8.23460977376409
chrMT	A8	15	0.332	14001	15000	-7.94171938377103
chrMT	A8	15	0.305	15001	16000	-8.06409338266771
chrMT	A8	15	1.542	16001	17000	-5.72617176520292
chrMT	A8	15	3.255	17001	18000	-4.64831698706496
chrMT	A8	15	0.433	18001	19000	-7.55853560039123
chrMT	A8	15	1.726	19001	20000	-5.563542065939
chrMT	A8	15	0.761	20001	21000	-6.74500617161441
chrMT	A8	15	0.075	21001	22000	-10.0879401246221
chrMT	A8	15	0.515	22001	23000	-7.30833019304738
chrMT	A8	15	0.661	23001	24000	-6.94825235361027
chrMT	A8	15	0.102	24001	25000	-9.64433347314646
chrMT	A8	15	0.052	25001	26000	-10.6163190969769
chrMT	A8	15	0.413	26001	27000	-7.62676084369851
chrMT	A8	15	0.525	27001	28000	-7.28058520256447
chrMT	A8	15	0.161	28001	29000	-8.98584193700334
chrMT	A8	15	0.473	29001	30000	-7.43106244177856
chrMT	A8	15	1.37	30001	31000	-5.89679863727007
chrMT	A8	15	0.29	31001	32000	-8.13684972510302
chrMT	A8	15	0.125	32001	33000	-9.35097453045587
chrMT	A8	15	0.473	33001	34000	-7.43106244177856
chrMT	A8	15	0.01	34001	35000	-12.9948307202306
chrMT	A8	15	0.064	35001	36000	-10.316758815118
chrMT	A8	15	0.561	36001	37000	-7.18490185450916
chrMT	A8	15	1.108	37001	38000	-6.20301664906877
chrMT	A8	15	0.01	38001	39000	-12.9948307202306
chrMT	A8	15	0.367	39001	40000	-7.79712256227474
chrMT	A8	15	0.384	40001	41000	-7.7317963143968
chrMT	A8	15	0.036	41001	42000	-11.1468338136756
chrMT	A8	15	1.397	42001	43000	-5.86864250970849
chrMT	A8	15	0.662	43001	44000	-6.94607140831074
chrMT	A8	15	0.211	44001	45000	-8.59565962641077
chrMT	A8	15	0.01	45001	46000	-12.9948307202306
chrMT	A8	15	0.349	46001	47000	-7.86967558890831
chrMT	A8	15	0.121	47001	48000	-9.39789557784336
chrMT	A8	15	1.773	48001	49000	-5.52478199421927
chrMT	A8	15	0.877	49001	50000	-6.54032578267323
chrMT	A8	15	4.066	50001	51000	-4.32736431527323
chrMT	A8	15	5.022	51001	52000	-4.02271250184646
chrMT	A8	15	2.46	52001	53000	-5.05231621489136
chrMT	A8	15	0.942	53001	54000	-6.43717556550517
chrMT	A8	15	3.817	54001	55000	-4.4185353439024
chrMT	A8	15	2.533	55001	56000	-5.01012745340546
chrMT	A8	15	1.313	56001	57000	-5.95810761422507
chrMT	A8	15	31.585	57001	58000	-1.36980686335019
chrMT	A8	15	0.764	58001	59000	-6.73932998708221
chrMT	A8	15	0.435	59001	60000	-7.55188722438187
chrMT	A8	15	4.171	60001	61000	-4.29058121822873
chrMT	A8	15	1.249	61001	62000	-6.03020105351
chrMT	A8	15	2.369	62001	63000	-5.10669633187773
chrMT	A8	15	1.74	63001	64000	-5.55188722438187
chrMT	A8	15	0.786	64001	65000	-6.69837331285935
chrMT	A8	15	0.276	65001	66000	-8.20823435833979
chrMT	A8	15	0.2	66001	67000	-8.67290262534323
chrMT	A8	15	0.17	67001	68000	-8.90736787898026
chrMT	A8	15	0.364	68001	69000	-7.80896417491926
chrMT	A8	15	0.508	69001	70000	-7.32807412834579
chrMT	A8	15	0.766	70001	71000	-6.735558233193
chrMT	A8	15	0.256	71001	72000	-8.31675881511796
chrMT	A8	15	0.325	72001	73000	-7.97246290720214
chrMT	A8	15	0.244	73001	74000	-8.38602147755507
chrMT	A8	15	0.299	74001	75000	-8.09275714091985
chrMT	A8	15	0.427	75001	76000	-7.57866655549747
chrMT	A8	15	0.01	76001	77000	-12.9948307202306
chrMT	A8	2	177.178	1	1000	1.23143459067467
chrMT	A8	2	82.695	1001	2000	0.132107120801526
chrMT	A8	2	83.084	2001	3000	0.138877693683773
chrMT	A8	2	228.747	3001	4000	1.59998793622062
chrMT	A8	2	332.881	4001	5000	2.14124164100684
chrMT	A8	2	127.926	5001	6000	0.761544624505596
chrMT	A8	2	40.382	6001	7000	-0.901980616528
chrMT	A8	2	100.534	7001	8000	0.41391860833565
chrMT	A8	2	97.604	8001	9000	0.371247292073862
chrMT	A8	2	52.315	9001	10000	-0.528468319333511
chrMT	A8	2	49.008	10001	11000	-0.622675709299147
chrMT	A8	2	127.083	11001	12000	0.752006166257335
chrMT	A8	2	113.505	12001	13000	0.588990964502669
chrMT	A8	2	89.841	13001	14000	0.251681004793819
chrMT	A8	2	117.2	14001	15000	0.635207683298869
chrMT	A8	2	166.899	15001	16000	1.14521042414477
chrMT	A8	2	106.668	16001	17000	0.499362551505491
chrMT	A8	2	453.178	17001	18000	2.58631293925738
chrMT	A8	2	105.256	18001	19000	0.480137588384042
chrMT	A8	2	221.53	19001	20000	1.55373719796464
chrMT	A8	2	83.368	20001	21000	0.143800744043017
chrMT	A8	2	228.603	21001	22000	1.59907944997265
chrMT	A8	2	142.764	22001	23000	0.919867342420735
chrMT	A8	2	91.669	23001	24000	0.280740954133967
chrMT	A8	2	534.505	24001	25000	2.82443855716542
chrMT	A8	2	419.122	25001	26000	2.47360536504274
chrMT	A8	2	168.996	26001	27000	1.16322421301387
chrMT	A8	2	83.394	27001	28000	0.14425060757748
chrMT	A8	2	60.29	28001	29000	-0.323774251972974
chrMT	A8	2	107.074	29001	30000	0.504843317017695
chrMT	A8	2	177.563	30001	31000	1.23456610244704
chrMT	A8	2	161.598	31001	32000	1.09864445638128
chrMT	A8	2	40.786	32001	33000	-0.887618956521057
chrMT	A8	2	75.327	33001	34000	-0.00252590816181925
chrMT	A8	2	20.595	34001	35000	-1.87339885514248
chrMT	A8	2	77.005	35001	36000	0.0292591429135708
chrMT	A8	2	96.298	36001	37000	0.351812853895109
chrMT	A8	2	68.286	37001	38000	-0.144103153944577
chrMT	A8	2	290.839	38001	39000	1.94645585368341
chrMT	A8	2	414.675	39001	40000	2.45821618594965
chrMT	A8	2	398.849	40001	41000	2.40207777431404
chrMT	A8	2	213.615	41001	42000	1.501248069861
chrMT	A8	2	488.469	42001	43000	2.6945021200202
chrMT	A8	2	669.344	43001	44000	3.14898296796643
chrMT	A8	2	390.142	44001	45000	2.37023443087088
chrMT	A8	2	342.063	45001	46000	2.18049717378782
chrMT	A8	2	333.694	46001	47000	2.14476085984897
chrMT	A8	2	259.262	47001	48000	1.78064587958717
chrMT	A8	2	1427.704	48001	49000	4.24186011076435
chrMT	A8	2	307.668	49001	50000	2.02760951287458
chrMT	A8	2	543.093	50001	51000	2.84743438182684
chrMT	A8	2	790.783	51001	52000	3.38951697034266
chrMT	A8	2	339.232	52001	53000	2.168507380326
chrMT	A8	2	402.161	53001	54000	2.41400829504599
chrMT	A8	2	871.365	54001	55000	3.52951227941915
chrMT	A8	2	655.618	55001	56000	3.11909057772936
chrMT	A8	2	449.391	56001	57000	2.57420634534316
chrMT	A8	2	468.701	57001	58000	2.63490298643011
chrMT	A8	2	356.231	58001	59000	2.23904818191603
chrMT	A8	2	304.719	59001	60000	2.01371457205073
chrMT	A8	2	1447.771	60001	61000	4.26199663177843
chrMT	A8	2	1194.869	61001	62000	3.9850156647826
chrMT	A8	2	182.212	62001	63000	1.27185308788397
chrMT	A8	2	155.773	63001	64000	1.04568030751766
chrMT	A8	2	41.482	64001	65000	-0.863207527879218
chrMT	A8	2	32.483	65001	66000	-1.21600810112685
chrMT	A8	2	18.873	66001	67000	-1.9993692133592
chrMT	A8	2	15.8	67001	68000	-2.25576842294628
chrMT	A8	2	29.015	68001	69000	-1.37889405245739
chrMT	A8	2	22.79	69001	70000	-1.72729205674544
chrMT	A8	2	38.714	70001	71000	-0.962837604174912
chrMT	A8	2	12.98	71001	72000	-2.5394025980116
chrMT	A8	2	18.988	72001	73000	-1.99060502646867
chrMT	A8	2	20.785	73001	74000	-1.86015023338637
chrMT	A8	2	21.744	74001	75000	-1.79507562013071
chrMT	A8	2	21.361	75001	76000	-1.82071379400151
chrMT	A8	2	3.758	76001	77000	-4.32765600947805
chrMT	A8	3	32.891	1	1000	-1.24024029426506
chrMT	A8	3	16.395	1001	2000	-2.24467726428627
chrMT	A8	3	20.533	2001	3000	-1.91998873638237
chrMT	A8	3	105.555	3001	4000	0.441989847719611
chrMT	A8	3	153.316	4001	5000	0.980503192834446
chrMT	A8	3	146.715	5001	6000	0.91701130717063
chrMT	A8	3	170.252	6001	7000	1.13166667496728
chrMT	A8	3	327.434	7001	8000	2.07519906462414
chrMT	A8	3	273.026	8001	9000	1.81303327300053
chrMT	A8	3	155.559	9001	10000	1.00145679452192
chrMT	A8	3	143.705	10001	11000	0.887105187949371
chrMT	A8	3	276.046	11001	12000	1.82890362501183
chrMT	A8	3	244.597	12001	13000	1.65440163808429
chrMT	A8	3	199.283	13001	14000	1.35881357401064
chrMT	A8	3	220.48	14001	15000	1.50464272202496
chrMT	A8	3	241.48	15001	16000	1.63589863513339
chrMT	A8	3	135.442	16001	17000	0.80167011088419
chrMT	A8	3	388.298	17001	18000	2.32115920527048
chrMT	A8	3	84.744	18001	19000	0.125178060914059
chrMT	A8	3	181.316	19001	20000	1.22250116836009
chrMT	A8	3	53.074	20001	21000	-0.54992788233845
chrMT	A8	3	166.167	21001	22000	1.09662882684182
chrMT	A8	3	94.091	22001	23000	0.276123566752358
chrMT	A8	3	66.412	23001	24000	-0.226489219982533
chrMT	A8	3	365.783	24001	25000	2.2349829553356
chrMT	A8	3	240.001	25001	26000	1.62703534592072
chrMT	A8	3	152.317	26001	27000	0.971071897924401
chrMT	A8	3	102.34	27001	28000	0.397365067330706
chrMT	A8	3	52.347	28001	29000	-0.569826307163768
chrMT	A8	3	81.186	29001	30000	0.0632977994232985
chrMT	A8	3	170.572	30001	31000	1.13437577144371
chrMT	A8	3	136.53	31001	32000	0.813212921010011
chrMT	A8	3	44.931	32001	33000	-0.790221994674789
chrMT	A8	3	61.471	33001	34000	-0.338027211233153
chrMT	A8	3	13.671	34001	35000	-2.5068143896223
chrMT	A8	3	78.199	35001	36000	0.00921699261173018
chrMT	A8	3	111.045	36001	37000	0.515139363289435
chrMT	A8	3	88.53	37001	38000	0.188233255473828
chrMT	A8	3	200.382	38001	39000	1.36674784819637
chrMT	A8	3	463.964	39001	40000	2.57800779664457
chrMT	A8	3	403.124	40001	41000	2.37521860551053
chrMT	A8	3	121.639	41001	42000	0.646600789935719
chrMT	A8	3	192.221	42001	43000	1.30676088694254
chrMT	A8	3	262.134	43001	44000	1.7542994189353
chrMT	A8	3	158.073	44001	45000	1.02458589496855
chrMT	A8	3	155.586	45001	46000	1.00170717788789
chrMT	A8	3	153.493	46001	47000	0.98216779231208
chrMT	A8	3	121.636	47001	48000	0.646565208103447
chrMT	A8	3	692.055	48001	49000	3.15488162724386
chrMT	A8	3	173.797	49001	50000	1.1613981081313
chrMT	A8	3	368.573	50001	51000	2.24594531836066
chrMT	A8	3	934.156	51001	52000	3.58765842273789
chrMT	A8	3	381.787	52001	53000	2.29676290810532
chrMT	A8	3	449.055	53001	54000	2.53088708512337
chrMT	A8	3	1156.049	54001	55000	3.8951255725985
chrMT	A8	3	756.538	55001	56000	3.2834074779806
chrMT	A8	3	473.278	56001	57000	2.60668278982537
chrMT	A8	3	294.697	57001	58000	1.92322730284695
chrMT	A8	3	249.904	58001	59000	1.68536892246752
chrMT	A8	3	161.292	59001	60000	1.05366981220837
chrMT	A8	3	769.368	60001	61000	3.30766875434376
chrMT	A8	3	659.126	61001	62000	3.08454920927696
chrMT	A8	3	118.665	62001	63000	0.610889406627537
chrMT	A8	3	150.975	63001	64000	0.958304601850523
chrMT	A8	3	26.573	64001	65000	-1.54797205370255
chrMT	A8	3	28.042	65001	66000	-1.47034391769639
chrMT	A8	3	13.389	66001	67000	-2.53688495359369
chrMT	A8	3	4.082	67001	68000	-4.25058507853398
chrMT	A8	3	10.823	68001	69000	-2.84383271442907
chrMT	A8	3	7.681	69001	70000	-3.33856711127021
chrMT	A8	3	15.829	70001	71000	-2.2953630501891
chrMT	A8	3	4.091	71001	72000	-4.24740772367865
chrMT	A8	3	7.039	72001	73000	-3.46449077487084
chrMT	A8	3	7.105	73001	74000	-3.45102661143656
chrMT	A8	3	6.627	74001	75000	-3.55150534149027
chrMT	A8	3	9.559	75001	76000	-3.023001560115
chrMT	A8	3	1.893	76001	77000	-5.35918684986299
chrMT	A8	4	91.389	1	1000	0.367476679924948
chrMT	A8	4	48.527	1001	2000	-0.545756172761326
chrMT	A8	4	109.393	2001	3000	0.626904672278106
chrMT	A8	4	575.882	3001	4000	3.02315747776474
chrMT	A8	4	509.388	4001	5000	2.84614922194682
chrMT	A8	4	370.469	5001	6000	2.38673707463879
chrMT	A8	4	238.177	6001	7000	1.74941835191253
chrMT	A8	4	520.7	7001	8000	2.87783665521209
chrMT	A8	4	471.31	8001	9000	2.73406054048297
chrMT	A8	4	277.301	9001	10000	1.96883706750264
chrMT	A8	4	260.563	10001	11000	1.87901648393909
chrMT	A8	4	389.93	11001	12000	2.4605994039536
chrMT	A8	4	344.978	12001	13000	2.2838886094967
chrMT	A8	4	291.479	13001	14000	2.0407761947323
chrMT	A8	4	318.045	14001	15000	2.16661515450861
chrMT	A8	4	279.649	15001	16000	1.98100141986724
chrMT	A8	4	117.852	16001	17000	0.734360490445771
chrMT	A8	4	235.663	17001	18000	1.73410951616532
chrMT	A8	4	55.027	18001	19000	-0.364404169437079
chrMT	A8	4	102.959	19001	20000	0.539454194897532
chrMT	A8	4	101.945	20001	21000	0.525175267074355
chrMT	A8	4	61.821	21001	22000	-0.196446855368537
chrMT	A8	4	24.258	22001	23000	-1.54608323696004
chrMT	A8	4	16.358	23001	24000	-2.11454747749204
chrMT	A8	4	96.871	24001	25000	0.451520988297323
chrMT	A8	4	78.498	25001	26000	0.14811205057103
chrMT	A8	4	72.973	26001	27000	0.0428189193498401
chrMT	A8	4	64.316	27001	28000	-0.13936616251736
chrMT	A8	4	40.671	28001	29000	-0.800543382839572
chrMT	A8	4	71.105	29001	30000	0.00540716522153261
chrMT	A8	4	120.927	30001	31000	0.771520647059273
chrMT	A8	4	98.855	31001	32000	0.480770091658032
chrMT	A8	4	27.368	32001	33000	-1.37205383718499
chrMT	A8	4	48.163	33001	34000	-0.556618588227648
chrMT	A8	4	12.283	34001	35000	-2.52788087881148
chrMT	A8	4	64.697	35001	36000	-0.130845030406178
chrMT	A8	4	63.116	36001	37000	-0.166538069490318
chrMT	A8	4	44.936	37001	38000	-0.656672138374278
chrMT	A8	4	73.721	38001	39000	0.0575317943597617
chrMT	A8	4	223.127	39001	40000	1.65524934928796
chrMT	A8	4	200.706	40001	41000	1.50246799443636
chrMT	A8	4	75.713	41001	42000	0.0959971872991132
chrMT	A8	4	91.266	42001	43000	0.365533656007155
chrMT	A8	4	112.942	43001	44000	0.672966332680365
chrMT	A8	4	73.173	44001	45000	0.0467675623274255
chrMT	A8	4	79.558	45001	46000	0.167463162468706
chrMT	A8	4	73.379	46001	47000	0.0508233974461503
chrMT	A8	4	79.111	47001	48000	0.159334461974782
chrMT	A8	4	412.665	48001	49000	2.5423553304739
chrMT	A8	4	110.539	49001	50000	0.641939714750349
chrMT	A8	4	255.819	50001	51000	1.8525076674643
chrMT	A8	4	1205.907	51001	52000	4.08943099371682
chrMT	A8	4	548.694	52001	53000	2.95338604842589
chrMT	A8	4	530.066	53001	54000	2.90355625333812
chrMT	A8	4	1098.237	54001	55000	3.95450176550031
chrMT	A8	4	778.942	55001	56000	3.45890015773677
chrMT	A8	4	683.576	56001	57000	3.27048599411003
chrMT	A8	4	568.883	57001	58000	3.00551621792907
chrMT	A8	4	433.367	58001	59000	2.61297354785699
chrMT	A8	4	345.749	59001	60000	2.28710932719989
chrMT	A8	4	1460.146	60001	61000	4.36542497476767
chrMT	A8	4	1284.317	61001	62000	4.18031368125426
chrMT	A8	4	417.786	62001	63000	2.56014839701872
chrMT	A8	4	391.288	63001	64000	2.4656151149047
chrMT	A8	4	114.706	64001	65000	0.695325105782295
chrMT	A8	4	70.721	65001	66000	-0.00240517171876414
chrMT	A8	4	62.315	66001	67000	-0.184964366607713
chrMT	A8	4	45.545	67001	68000	-0.637251164958838
chrMT	A8	4	86.838	68001	69000	0.293782652657532
chrMT	A8	4	60.388	69001	70000	-0.230281953483671
chrMT	A8	4	104.161	70001	71000	0.556199452792463
chrMT	A8	4	40.426	71001	72000	-0.809260384956893
chrMT	A8	4	53.359	72001	73000	-0.408812217147799
chrMT	A8	4	46.635	73001	74000	-0.603130729003306
chrMT	A8	4	55.182	74001	75000	-0.360346100154577
chrMT	A8	4	59.066	75001	76000	-0.262215931675933
chrMT	A8	4	8.797	76001	77000	-3.00946032924907
chrMT	A8	5	104.557	1	1000	0.226184999050792
chrMT	A8	5	52.903	1001	2000	-0.756683211799325
chrMT	A8	5	77.795	2001	3000	-0.20035531413103
chrMT	A8	5	325.965	3001	4000	1.86661241228386
chrMT	A8	5	341.148	4001	5000	1.93229310515467
chrMT	A8	5	187.071	5001	6000	1.06548127408586
chrMT	A8	5	63.84	6001	7000	-0.485572096612447
chrMT	A8	5	120.919	7001	8000	0.435936299755813
chrMT	A8	5	115.59	8001	9000	0.370911938545914
chrMT	A8	5	71.257	9001	10000	-0.327001002509941
chrMT	A8	5	61.782	10001	11000	-0.532846173688564
chrMT	A8	5	68.208	11001	12000	-0.390091787758218
chrMT	A8	5	56.725	12001	13000	-0.656048044275092
chrMT	A8	5	47.977	13001	14000	-0.897689799387488
chrMT	A8	5	60.101	14001	15000	-0.572643752526784
chrMT	A8	5	53.789	15001	16000	-0.732721580372822
chrMT	A8	5	150.418	16001	17000	0.750872566369125
chrMT	A8	5	301.342	17001	18000	1.75329711147872
chrMT	A8	5	77.83	18001	19000	-0.199706391049489
chrMT	A8	5	143.014	19001	20000	0.678051729675922
chrMT	A8	5	66.344	20001	21000	-0.430066750725777
chrMT	A8	5	107.307	21001	22000	0.263639537775424
chrMT	A8	5	53.25	22001	23000	-0.747251222834229
chrMT	A8	5	38.081	23001	24000	-1.23096138412511
chrMT	A8	5	206.453	24001	25000	1.20770872940253
chrMT	A8	5	167.742	25001	26000	0.908139309351475
chrMT	A8	5	146.338	26001	27000	0.711199793518416
chrMT	A8	5	120.477	27001	28000	0.430653097708575
chrMT	A8	5	83.401	28001	29000	-0.0999680661047841
chrMT	A8	5	128.471	29001	30000	0.523338080624602
chrMT	A8	5	272.291	30001	31000	1.60704464466761
chrMT	A8	5	217.492	31001	32000	1.28285768205492
chrMT	A8	5	62.514	32001	33000	-0.515853430897751
chrMT	A8	5	95.16	33001	34000	0.0903225235903425
chrMT	A8	5	24.3	34001	35000	-1.87907643434165
chrMT	A8	5	113.875	35001	36000	0.349346400741983
chrMT	A8	5	111.086	36001	37000	0.313572354231368
chrMT	A8	5	87.655	37001	38000	-0.0281963609019171
chrMT	A8	5	182.474	38001	39000	1.02958626142914
chrMT	A8	5	162.199	39001	40000	0.859660271698399
chrMT	A8	5	178.204	40001	41000	0.995425066938112
chrMT	A8	5	136.8	41001	42000	0.613963576938468
chrMT	A8	5	282.028	42001	43000	1.65773374854379
chrMT	A8	5	402.244	43001	44000	2.16996624812378
chrMT	A8	5	238.508	44001	45000	1.41593300442034
chrMT	A8	5	225.603	45001	46000	1.33568159909829
chrMT	A8	5	214.718	46001	47000	1.26433848538328
chrMT	A8	5	165.646	47001	48000	0.889998712525139
chrMT	A8	5	862.121	48001	49000	3.26978571469384
chrMT	A8	5	195.663	49001	50000	1.13026631390439
chrMT	A8	5	406.086	50001	51000	2.18368063726492
chrMT	A8	5	738	51001	52000	3.04551616300033
chrMT	A8	5	263.245	52001	53000	1.55830147609021
chrMT	A8	5	269.725	53001	54000	1.59338459355507
chrMT	A8	5	625.191	54001	55000	2.80619235673997
chrMT	A8	5	498.797	55001	56000	2.48034813486111
chrMT	A8	5	407.597	56001	57000	2.18903877971728
chrMT	A8	5	442.85	57001	58000	2.30871346558142
chrMT	A8	5	379.413	58001	59000	2.08566445802657
chrMT	A8	5	304.638	59001	60000	1.76899125896726
chrMT	A8	5	1431.647	60001	61000	4.0014992539461
chrMT	A8	5	1193.764	61001	62000	3.73934109421607
chrMT	A8	5	271.188	62001	63000	1.60118868771281
chrMT	A8	5	230.444	63001	64000	1.36631155186835
chrMT	A8	5	88.79	64001	65000	-0.00963554640360961
chrMT	A8	5	77.584	65001	66000	-0.204273589325825
chrMT	A8	5	50.116	66001	67000	-0.834761477376746
chrMT	A8	5	25.785	67001	68000	-1.79350070263558
chrMT	A8	5	48.855	68001	69000	-0.871526527717733
chrMT	A8	5	28.332	69001	70000	-1.65760030077236
chrMT	A8	5	55.37	70001	71000	-0.690928226304396
chrMT	A8	5	17.058	71001	72000	-2.38958424332347
chrMT	A8	5	23.054	72001	73000	-1.95501566001254
chrMT	A8	5	22.183	73001	74000	-2.01057826128232
chrMT	A8	5	25.153	74001	75000	-1.82930226754521
chrMT	A8	5	27.183	75001	76000	-1.71732806299148
chrMT	A8	5	6.944	76001	77000	-3.68619389527768
chrMT	A8	7	54.273	1	1000	-0.855003469562578
chrMT	A8	7	21.589	1001	2000	-2.18494170756885
chrMT	A8	7	37.973	2001	3000	-1.37026414558751
chrMT	A8	7	259.287	3001	4000	1.40123984277179
chrMT	A8	7	216.092	4001	5000	1.1383356306643
chrMT	A8	7	155.651	5001	6000	0.665004813496959
chrMT	A8	7	81.796	6001	7000	-0.263207833001001
chrMT	A8	7	249.917	7001	8000	1.34813900848541
chrMT	A8	7	231.903	8001	9000	1.2402114513262
chrMT	A8	7	132.602	9001	10000	0.433792503271628
chrMT	A8	7	140.247	10001	11000	0.514659878596073
chrMT	A8	7	152.638	11001	12000	0.636804140974341
chrMT	A8	7	105.535	12001	13000	0.104411506645113
chrMT	A8	7	80.066	13001	14000	-0.294048394296889
chrMT	A8	7	98.183	14001	15000	0.000235122186965332
chrMT	A8	7	79.523	15001	16000	-0.303865943504972
chrMT	A8	7	155.958	16001	17000	0.66784752677452
chrMT	A8	7	410.022	17001	18000	2.06239128843753
chrMT	A8	7	90.471	18001	19000	-0.117782708966843
chrMT	A8	7	177.602	19001	20000	0.855337796041348
chrMT	A8	7	72.662	20001	21000	-0.434037050955295
chrMT	A8	7	127.183	21001	22000	0.373595812599163
chrMT	A8	7	71.113	22001	23000	-0.465124807372569
chrMT	A8	7	31.133	23001	24000	-1.65679352429095
chrMT	A8	7	174.725	24001	25000	0.831776014574478
chrMT	A8	7	108.597	25001	26000	0.145674217016666
chrMT	A8	7	121.136	26001	27000	0.30331764631518
chrMT	A8	7	119.43	27001	28000	0.282855245142088
chrMT	A8	7	96.621	28001	29000	-0.022901342675775
chrMT	A8	7	178.26	29001	30000	0.860672978886152
chrMT	A8	7	352.299	30001	31000	1.84349034763076
chrMT	A8	7	300.719	31001	32000	1.61510599089508
chrMT	A8	7	80.476	32001	33000	-0.286679528171767
chrMT	A8	7	128.098	33001	34000	0.383937918870015
chrMT	A8	7	36.289	34001	35000	-1.43570582535555
chrMT	A8	7	170.448	35001	36000	0.796021639184347
chrMT	A8	7	190.659	36001	37000	0.957684602530283
chrMT	A8	7	142.437	37001	38000	0.537013923051664
chrMT	A8	7	176.453	38001	39000	0.845973926465527
chrMT	A8	7	143.17	39001	40000	0.544419188236308
chrMT	A8	7	139.55	40001	41000	0.507472092283011
chrMT	A8	7	107.612	41001	42000	0.132528932160095
chrMT	A8	7	257.63	42001	43000	1.39199056727561
chrMT	A8	7	373.543	43001	44000	1.92796429473832
chrMT	A8	7	210.3	44001	45000	1.09913881794872
chrMT	A8	7	214.534	45001	46000	1.12789627641625
chrMT	A8	7	209.606	46001	47000	1.09436998268546
chrMT	A8	7	183.023	47001	48000	0.898714927322275
chrMT	A8	7	1052.913	48001	49000	3.42300429717949
chrMT	A8	7	199.053	49001	50000	1.01984258285267
chrMT	A8	7	358.713	50001	51000	1.86951999835897
chrMT	A8	7	766.914	51001	52000	2.96575477412116
chrMT	A8	7	341.556	52001	53000	1.79881210363852
chrMT	A8	7	363.055	53001	54000	1.88687808969958
chrMT	A8	7	852.568	54001	55000	3.11850487456759
chrMT	A8	7	574.248	55001	56000	2.54836389484992
chrMT	A8	7	446.483	56001	57000	2.18529521314131
chrMT	A8	7	290.553	57001	58000	1.56549131864453
chrMT	A8	7	295.393	58001	59000	1.58932560649039
chrMT	A8	7	244.678	59001	60000	1.31757435651431
chrMT	A8	7	1309.871	60001	61000	3.73804280061752
chrMT	A8	7	981.572	61001	62000	3.32178406362262
chrMT	A8	7	417.768	62001	63000	2.08939195762878
chrMT	A8	7	245.551	63001	64000	1.32271266576189
chrMT	A8	7	57.097	64001	65000	-0.781823181749883
chrMT	A8	7	25.695	65001	66000	-1.93375047486526
chrMT	A8	7	26.397	66001	67000	-1.89486414935851
chrMT	A8	7	32.429	67001	68000	-1.59795359033409
chrMT	A8	7	74.692	68001	69000	-0.394284397760796
chrMT	A8	7	55.205	69001	70000	-0.830439187024327
chrMT	A8	7	102.467	70001	71000	0.0618493253963652
chrMT	A8	7	38.702	71001	72000	-1.34283000468189
chrMT	A8	7	42.796	72001	73000	-1.19776216799506
chrMT	A8	7	36.031	73001	74000	-1.44599943430495
chrMT	A8	7	42.428	74001	75000	-1.21022145351962
chrMT	A8	7	65.562	75001	76000	-0.582378261801111
chrMT	A8	7	5.828	76001	77000	-4.07416534449327
chrMT	A8	9	0.256	1	1000	-5.96713617766205
chrMT	A8	9	0.01	1001	2000	-10.6452080827747
chrMT	A8	9	0.43	2001	3000	-5.21894332807259
chrMT	A8	9	601.553	3001	4000	5.23119614883726
chrMT	A8	9	99.598	4001	5000	2.63669297410996
chrMT	A8	9	45.763	5001	6000	1.51475783318324
chrMT	A8	9	2.092	6001	7000	-2.9364690414151
chrMT	A8	9	2.132	7001	8000	-2.90914445490287
chrMT	A8	9	1.158	8001	9000	-3.78971663967281
chrMT	A8	9	1.467	9001	10000	-3.44848302198866
chrMT	A8	9	0.54	10001	11000	-4.89032058061122
chrMT	A8	9	0.731	11001	12000	-4.45340858170961
chrMT	A8	9	1.5	12001	13000	-3.4163893922788
chrMT	A8	9	0.482	13001	14000	-5.05424684143208
chrMT	A8	9	1.912	14001	15000	-3.0662693696813
chrMT	A8	9	1.986	15001	16000	-3.01148627013367
chrMT	A8	9	73.765	16001	17000	2.20351265091284
chrMT	A8	9	127.391	17001	18000	2.99176765353682
chrMT	A8	9	18.842	18001	19000	0.234528311049367
chrMT	A8	9	38.298	19001	20000	1.2578452555149
chrMT	A8	9	60.877	20001	21000	1.92647346690882
chrMT	A8	9	34.191	21001	22000	1.09419282044529
chrMT	A8	9	17.253	22001	23000	0.107423445448417
chrMT	A8	9	21.028	23001	24000	0.39288784190983
chrMT	A8	9	62.461	24001	25000	1.9635318689643
chrMT	A8	9	62.238	25001	26000	1.9583719023715
chrMT	A8	9	50.871	26001	27000	1.66741965623854
chrMT	A8	9	39.003	27001	28000	1.28416129813579
chrMT	A8	9	21.786	28001	29000	0.443977537859318
chrMT	A8	9	22.435	29001	30000	0.486327385901662
chrMT	A8	9	42.194	30001	31000	1.39761406371865
chrMT	A8	9	34.288	31001	32000	1.0982799570145
chrMT	A8	9	12.712	32001	33000	-0.333232768313527
chrMT	A8	9	20.964	33001	34000	0.38849021597587
chrMT	A8	9	8.616	34001	35000	-0.894333643117839
chrMT	A8	9	31.668	35001	36000	0.983601958385379
chrMT	A8	9	24.122	36001	37000	0.590925730620506
chrMT	A8	9	27.812	37001	38000	0.796283696530042
chrMT	A8	9	32.805	38001	39000	1.03449192299457
chrMT	A8	9	46.57	39001	40000	1.53997708404564
chrMT	A8	9	18.974	40001	41000	0.24460005416541
chrMT	A8	9	13.801	41001	42000	-0.214650991777858
chrMT	A8	9	31.127	42001	43000	0.958742739385631
chrMT	A8	9	34.412	43001	44000	1.10348794476822
chrMT	A8	9	22.478	44001	45000	0.489089878084897
chrMT	A8	9	26.53	45001	46000	0.728200877454012
chrMT	A8	9	37.463	46001	47000	1.22604263568683
chrMT	A8	9	29.52	47001	48000	0.882268923285713
chrMT	A8	9	159	48001	49000	3.3115310622844
chrMT	A8	9	157.755	49001	50000	3.30019002851754
chrMT	A8	9	278.169	50001	51000	4.1184659472867
chrMT	A8	9	524.751	51001	52000	5.03413730758932
chrMT	A8	9	191.016	52001	53000	3.57619778400896
chrMT	A8	9	206.387	53001	54000	3.68785639725398
chrMT	A8	9	402.86	54001	55000	4.65278286407203
chrMT	A8	9	359.73	55001	56000	4.48941877608808
chrMT	A8	9	233.127	56001	57000	3.86362039909794
chrMT	A8	9	268.495	57001	58000	4.06739951890586
chrMT	A8	9	196.817	58001	59000	3.61935913511686
chrMT	A8	9	143.232	59001	60000	3.16085814331435
chrMT	A8	9	683.533	60001	61000	5.4155152875499
chrMT	A8	9	657.329	61001	62000	5.35911993195834
chrMT	A8	9	380.044	62001	63000	4.56867075455995
chrMT	A8	9	158.436	63001	64000	3.30640448017481
chrMT	A8	9	18.473	64001	65000	0.205994379721827
chrMT	A8	9	2.525	65001	66000	-2.66506850513553
chrMT	A8	9	2.112	66001	67000	-2.92274205830359
chrMT	A8	9	0.071	67001	68000	-7.81738905815736
chrMT	A8	9	1.16	68001	69000	-3.78722708764711
chrMT	A8	9	0.062	69001	70000	-8.01293986727517
chrMT	A8	9	0.104	70001	71000	-7.26669645952095
chrMT	A8	9	0.303	71001	72000	-5.7239621941891
chrMT	A8	9	0.304	72001	73000	-5.71920866421846
chrMT	A8	9	0.18	73001	74000	-6.47528308133237
chrMT	A8	9	0.62	74001	75000	-4.69101177238781
chrMT	A8	9	0.526	75001	76000	-4.92821718836974
chrMT	A8	9	0.352	76001	77000	-5.50770455902475
chrMT	A8	0	493.272	1	1000	4.45022471312077
chrMT	A8	0	210.611	1001	2000	3.22242210517455
chrMT	A8	0	147.983	2001	3000	2.71327276770213
chrMT	A8	0	224.542	3001	4000	3.31482663891792
chrMT	A8	0	499.618	4001	5000	4.46866677095085
chrMT	A8	0	311.555	5001	6000	3.7873281865622
chrMT	A8	0	231.785	6001	7000	3.36062852148277
chrMT	A8	0	568.377	7001	8000	4.65468949185836
chrMT	A8	0	476.669	8001	9000	4.40082911963311
chrMT	A8	0	337.595	9001	10000	3.90313485329491
chrMT	A8	0	309.205	10001	11000	3.77640496489106
chrMT	A8	0	493.633	11001	12000	4.45128016006448
chrMT	A8	0	500.764	12001	13000	4.47197216676982
chrMT	A8	0	372.875	13001	14000	4.04653338889745
chrMT	A8	0	415.477	14001	15000	4.20260993074686
chrMT	A8	0	374.952	15001	16000	4.05454723516068
chrMT	A8	0	730.149	16001	17000	5.01603221817375
chrMT	A8	0	1481.372	17001	18000	6.03670338484507
chrMT	A8	0	252.565	18001	19000	3.48449604324954
chrMT	A8	0	462.157	19001	20000	4.35622435119088
chrMT	A8	0	170.165	20001	21000	2.91477564643381
chrMT	A8	0	402.886	21001	22000	4.15821299007491
chrMT	A8	0	198.353	22001	23000	3.13591153409942
chrMT	A8	0	217.908	23001	24000	3.27156047905266
chrMT	A8	0	549.795	24001	25000	4.60673510294773
chrMT	A8	0	354.833	25001	26000	3.97498150501323
chrMT	A8	0	411.724	26001	27000	4.18951886427183
chrMT	A8	0	467.997	27001	28000	4.37434059807087
chrMT	A8	0	414.47	28001	29000	4.19910899726774
chrMT	A8	0	491.606	29001	30000	4.44534384009762
chrMT	A8	0	827.847	30001	31000	5.19720547447519
chrMT	A8	0	681.51	31001	32000	4.91657614261846
chrMT	A8	0	194.349	32001	33000	3.10649100081493
chrMT	A8	0	348.367	33001	34000	3.94844928358252
chrMT	A8	0	124.38	34001	35000	2.46259583861808
chrMT	A8	0	479.809	35001	36000	4.41030153552227
chrMT	A8	0	465.138	36001	37000	4.36550012369487
chrMT	A8	0	458.831	37001	38000	4.34580418379228
chrMT	A8	0	475.05	38001	39000	4.39592068442422
chrMT	A8	0	331.092	39001	40000	3.87507346841962
chrMT	A8	0	311.738	40001	41000	3.78817534255487
chrMT	A8	0	230.548	41001	42000	3.35290846678601
chrMT	A8	0	562.717	42001	43000	4.64025086502694
chrMT	A8	0	716.463	43001	44000	4.98873351824961
chrMT	A8	0	410.867	44001	45000	4.18651277717053
chrMT	A8	0	417.02	45001	46000	4.20795789235438
chrMT	A8	0	418.225	46001	47000	4.21212062001006
chrMT	A8	0	280.608	47001	48000	3.63639745642736
chrMT	A8	0	1529.745	48001	49000	6.08306059492911
chrMT	A8	0	407.537	49001	50000	4.17477236290346
chrMT	A8	0	741.046	50001	51000	5.03740441610435
chrMT	A8	0	744.84	51001	52000	5.04477186808983
chrMT	A8	0	245.843	52001	53000	3.44557859356562
chrMT	A8	0	272.644	53001	54000	3.59485972315857
chrMT	A8	0	597.904	54001	55000	4.72775517895086
chrMT	A8	0	609.702	55001	56000	4.7559455947987
chrMT	A8	0	368.826	56001	57000	4.03078167695485
chrMT	A8	0	539.988	57001	58000	4.58076866336704
chrMT	A8	0	421.528	58001	59000	4.22346978171424
chrMT	A8	0	354.779	59001	60000	3.97476193281783
chrMT	A8	0	1570.95	60001	61000	6.12140667466994
chrMT	A8	0	1441.915	61001	62000	5.99775553232674
chrMT	A8	0	610.321	62001	63000	4.75740954803063
chrMT	A8	0	759.105	63001	64000	5.07214077049179
chrMT	A8	0	449.329	64001	65000	4.31561349372474
chrMT	A8	0	220.98	65001	66000	3.29175711940841
chrMT	A8	0	185.11	66001	67000	3.03622415082538
chrMT	A8	0	295.244	67001	68000	3.70974905755736
chrMT	A8	0	707.535	68001	69000	4.9706428325889
chrMT	A8	0	539.274	69001	70000	4.57885979525259
chrMT	A8	0	962.408	70001	71000	5.41448995127859
chrMT	A8	0	347.86	71001	72000	3.94634811107693
chrMT	A8	0	359.678	72001	73000	3.99454723488293
chrMT	A8	0	744.778	73001	74000	5.04465177408911
chrMT	A8	0	483.764	74001	75000	4.42214472940447
chrMT	A8	0	467.081	75001	76000	4.37151407647552
chrMT	A8	0	90.624	76001	77000	2.00580639198315
chrMT	B12	1	658.555	1	1000	3.2425386156401
chrMT	B12	1	347.851	1001	2000	2.3217041499056
chrMT	B12	1	478.22	2001	3000	2.78090914909416
chrMT	B12	1	1054.193	3001	4000	3.92130179413068
chrMT	B12	1	1606.043	4001	5000	4.52867329654468
chrMT	B12	1	532.228	5001	6000	2.93527909288996
chrMT	B12	1	351.682	6001	7000	2.33750617770947
chrMT	B12	1	736.608	7001	8000	3.4041317475904
chrMT	B12	1	593.155	8001	9000	3.09164383290845
chrMT	B12	1	381.428	9001	10000	2.45464543514347
chrMT	B12	1	342.971	10001	11000	2.30132127585298
chrMT	B12	1	499.905	11001	12000	2.84488863852904
chrMT	B12	1	469.432	12001	13000	2.75415087185278
chrMT	B12	1	358.5	13001	14000	2.36520780067057
chrMT	B12	1	475.597	14001	15000	2.77297429653517
chrMT	B12	1	465.939	15001	16000	2.74337577362307
chrMT	B12	1	655.707	16001	17000	3.23628597817827
chrMT	B12	1	1379.329	17001	18000	4.30912938870902
chrMT	B12	1	405.194	18001	19000	2.54184749301389
chrMT	B12	1	664.207	19001	20000	3.25486760905867
chrMT	B12	1	308.13	20001	21000	2.14677383391687
chrMT	B12	1	490.151	21001	22000	2.81646094809747
chrMT	B12	1	228.382	22001	23000	1.71468363045611
chrMT	B12	1	60.875	23001	24000	-0.192843545948995
chrMT	B12	1	264.026	24001	25000	1.92391468793355
chrMT	B12	1	218.5	25001	26000	1.65086796146926
chrMT	B12	1	236.399	26001	27000	1.76445861447502
chrMT	B12	1	229.893	27001	28000	1.72419721992199
chrMT	B12	1	107.986	28001	29000	0.634078965985856
chrMT	B12	1	149.885	29001	30000	1.10709069205765
chrMT	B12	1	252.617	30001	31000	1.86018641109228
chrMT	B12	1	202.498	31001	32000	1.54114234083037
chrMT	B12	1	57.143	32001	33000	-0.284116633581123
chrMT	B12	1	95.038	33001	34000	0.449811062931131
chrMT	B12	1	25.103	34001	35000	-1.47083362560168
chrMT	B12	1	116.963	35001	36000	0.749286902503561
chrMT	B12	1	115.691	36001	37000	0.733511318354739
chrMT	B12	1	93.105	37001	38000	0.42016523349626
chrMT	B12	1	121.772	38001	39000	0.807417122828248
chrMT	B12	1	97.048	39001	40000	0.480005068524349
chrMT	B12	1	82.003	40001	41000	0.23698327714714
chrMT	B12	1	61.061	41001	42000	-0.188442196294545
chrMT	B12	1	122.287	42001	43000	0.813505724755091
chrMT	B12	1	137.423	43001	44000	0.981858164858715
chrMT	B12	1	89.149	44001	45000	0.357525201833246
chrMT	B12	1	94.385	45001	46000	0.439864186431394
chrMT	B12	1	101.355	46001	47000	0.542651942696947
chrMT	B12	1	93.771	47001	48000	0.430448404852136
chrMT	B12	1	717.416	48001	49000	3.36604460276122
chrMT	B12	1	233.208	49001	50000	1.74485196154407
chrMT	B12	1	654.422	50001	51000	3.23345593056919
chrMT	B12	1	1241.872	51001	52000	4.1576792589801
chrMT	B12	1	610.797	52001	53000	3.13392765793226
chrMT	B12	1	744.495	53001	54000	3.41949684149848
chrMT	B12	1	1125.017	54001	55000	4.01510957863341
chrMT	B12	1	897.82	55001	56000	3.68966091608934
chrMT	B12	1	686.162	56001	57000	3.30178391266727
chrMT	B12	1	923.645	57001	58000	3.73057314469445
chrMT	B12	1	735.832	58001	59000	3.40261109961102
chrMT	B12	1	609.256	59001	60000	3.13028323553381
chrMT	B12	1	2660.653	60001	61000	5.25694314425407
chrMT	B12	1	2226.26	61001	62000	4.99978486832508
chrMT	B12	1	925.575	62001	63000	3.73358457918024
chrMT	B12	1	1117.538	63001	64000	4.00548666529167
chrMT	B12	1	716.275	64001	65000	3.36374827058199
chrMT	B12	1	655.864	65001	66000	3.23663137026532
chrMT	B12	1	504.785	66001	67000	2.85890372212102
chrMT	B12	1	312.012	67001	68000	2.16483619803466
chrMT	B12	1	674.303	68001	69000	3.27663169802942
chrMT	B12	1	509.865	69001	70000	2.87334998841059
chrMT	B12	1	921.834	70001	71000	3.7277416613151
chrMT	B12	1	345.795	71001	72000	2.31315169032059
chrMT	B12	1	398.099	72001	73000	2.51636192921673
chrMT	B12	1	498.468	73001	74000	2.84073557308073
chrMT	B12	1	539.383	74001	75000	2.95454473390239
chrMT	B12	1	580.317	75001	76000	3.06007587404403
chrMT	B12	1	109.112	76001	77000	0.649044457909592
chrMT	B12	15	0.178	1	1000	-9.02330270562466
chrMT	B12	15	0.241	1001	2000	-8.58614680036109
chrMT	B12	15	0.058	2001	3000	-10.6410551414635
chrMT	B12	15	0.264	3001	4000	-8.4546420172326
chrMT	B12	15	0.458	4001	5000	-7.65983234849411
chrMT	B12	15	0.373	5001	6000	-7.95600431633582
chrMT	B12	15	0.31	6001	7000	-8.22291173131682
chrMT	B12	15	0.586	7001	8000	-7.30427928216881
chrMT	B12	15	0.146	8001	9000	-9.30921157771104
chrMT	B12	15	0.01	9001	10000	-13.1771080417037
chrMT	B12	15	0.562	10001	11000	-7.36460981637013
chrMT	B12	15	0.4	11001	12000	-7.85517994681633
chrMT	B12	15	0.345	12001	13000	-8.06858358492552
chrMT	B12	15	0.093	13001	14000	-9.95987732548302
chrMT	B12	15	0.271	14001	15000	-8.41688709523718
chrMT	B12	15	171.647	15001	16000	0.890048980326215
chrMT	B12	15	0.01	16001	17000	-13.1771080417037
chrMT	B12	15	0.548	17001	18000	-7.40100405363053
chrMT	B12	15	0.188	18001	19000	-8.94444728491342
chrMT	B12	15	0.26	19001	20000	-8.4766683235626
chrMT	B12	15	0.237	20001	21000	-8.6102928876928
chrMT	B12	15	0.4	21001	22000	-7.85517994681633
chrMT	B12	15	0.01	22001	23000	-13.1771080417037
chrMT	B12	15	0.096	23001	24000	-9.9140736358699
chrMT	B12	15	0.706	24001	25000	-7.03551176331988
chrMT	B12	15	3001.177	25001	26000	5.01806083980394
chrMT	B12	15	6362.992	26001	27000	6.10223774046645
chrMT	B12	15	4032.015	27001	28000	5.44403343873002
chrMT	B12	15	0.306	28001	29000	-8.2416482938984
chrMT	B12	15	0.46	29001	30000	-7.65354608564668
chrMT	B12	15	0.363	30001	31000	-7.99521039859531
chrMT	B12	15	0.417	31001	32000	-7.79513256314639
chrMT	B12	15	0.236	32001	33000	-8.61639308722921
chrMT	B12	15	0.01	33001	34000	-13.1771080417037
chrMT	B12	15	0.01	34001	35000	-13.1771080417037
chrMT	B12	15	0.395	35001	36000	-7.87332729352659
chrMT	B12	15	0.95	36001	37000	-6.60725243337275
chrMT	B12	15	0.178	37001	38000	-9.02330270562466
chrMT	B12	15	0.158	38001	39000	-9.19525538841395
chrMT	B12	15	0.293	39001	40000	-8.30427928216881
chrMT	B12	15	0.01	40001	41000	-13.1771080417037
chrMT	B12	15	0.324	41001	42000	-8.15918613370643
chrMT	B12	15	0.123	42001	43000	-9.55652163125182
chrMT	B12	15	0.01	43001	44000	-13.1771080417037
chrMT	B12	15	0.547	44001	45000	-7.4036391137985
chrMT	B12	15	0.25	45001	46000	-8.53325185192897
chrMT	B12	15	0.361	46001	47000	-8.00318110970388
chrMT	B12	15	0.067	47001	48000	-10.4329469461333
chrMT	B12	15	1.756	48001	49000	-5.7209590070557
chrMT	B12	15	0.098	49001	50000	-9.88432629247585
chrMT	B12	15	0.705	50001	51000	-7.0375566893049
chrMT	B12	15	0.628	51001	52000	-7.20441538769943
chrMT	B12	15	0.145	52001	53000	-9.31912704657612
chrMT	B12	15	0.176	53001	54000	-9.03960451795376
chrMT	B12	15	0.701	54001	55000	-7.04576550258043
chrMT	B12	15	0.523	55001	56000	-7.46836900034411
chrMT	B12	15	0.189	56001	57000	-8.93679371236998
chrMT	B12	15	0.622	57001	58000	-7.21826536646045
chrMT	B12	15	0.154	58001	59000	-9.23224959589616
chrMT	B12	15	0.315	59001	60000	-8.19982811820378
chrMT	B12	15	1.372	60001	61000	-6.07697137041824
chrMT	B12	15	1.007	61001	62000	-6.52318816858427
chrMT	B12	15	0.473	62001	63000	-7.61333976325166
chrMT	B12	15	0.624	63001	64000	-7.21363391772881
chrMT	B12	15	0.15	64001	65000	-9.27021744609517
chrMT	B12	15	0.01	65001	66000	-13.1771080417037
chrMT	B12	15	44.309	66001	67000	-1.06372398971494
chrMT	B12	15	0.201	67001	68000	-8.84798444541213
chrMT	B12	15	0.388	68001	69000	-7.89912329440393
chrMT	B12	15	0.066	69001	70000	-10.4546420172326
chrMT	B12	15	0.063	70001	71000	-10.5217562130911
chrMT	B12	15	0.592	71001	72000	-7.28958277096211
chrMT	B12	15	0.097	72001	73000	-9.89912329440393
chrMT	B12	15	0.136	73001	74000	-9.41157329534072
chrMT	B12	15	0.498	74001	75000	-7.53903420452297
chrMT	B12	15	0.077	75001	76000	-10.2322495958962
chrMT	B12	15	0.01	76001	77000	-13.1771080417037
chrMT	B12	2	257.782	1	1000	1.84052360813307
chrMT	B12	2	101.343	1001	2000	0.493618521076399
chrMT	B12	2	94.949	2001	3000	0.399596790325713
chrMT	B12	2	87.378	3001	4000	0.279714068522913
chrMT	B12	2	144.382	4001	5000	1.00426297286237
chrMT	B12	2	58.995	5001	6000	-0.2869633287065
chrMT	B12	2	37.643	6001	7000	-0.935174405903126
chrMT	B12	2	100.264	7001	8000	0.478175775414075
chrMT	B12	2	91.43	8001	9000	0.345111604167822
chrMT	B12	2	53.234	9001	10000	-0.435208041341567
chrMT	B12	2	57.656	10001	11000	-0.320085265249899
chrMT	B12	2	110.618	11001	12000	0.619958242308422
chrMT	B12	2	84.109	12001	13000	0.224704167181685
chrMT	B12	2	61.025	13001	14000	-0.23815562570205
chrMT	B12	2	69.89	14001	15000	-0.0424699690130328
chrMT	B12	2	81.764	15001	16000	0.18390976078971
chrMT	B12	2	107.462	16001	17000	0.578198672915662
chrMT	B12	2	542.848	17001	18000	2.91492037233851
chrMT	B12	2	175.09	18001	19000	1.28246876796242
chrMT	B12	2	342.214	19001	20000	2.24927086097413
chrMT	B12	2	100.637	20001	21000	0.483532900252439
chrMT	B12	2	307.674	21001	22000	2.09577461301637
chrMT	B12	2	194.35	22001	23000	1.43302918685599
chrMT	B12	2	156.231	23001	24000	1.11805282656952
chrMT	B12	2	726.656	24001	25000	3.33564463101695
chrMT	B12	2	356.213	25001	26000	2.3071122477613
chrMT	B12	2	376.432	26001	27000	2.38676135410768
chrMT	B12	2	301.332	27001	28000	2.06572596747769
chrMT	B12	2	79.052	28001	29000	0.13524594723673
chrMT	B12	2	136.693	29001	30000	0.925311444113628
chrMT	B12	2	278.349	30001	31000	1.9512669793482
chrMT	B12	2	231.291	31001	32000	1.68408120806701
chrMT	B12	2	66.355	32001	33000	-0.117350835668071
chrMT	B12	2	117.105	33001	34000	0.702174754686725
chrMT	B12	2	37.936	34001	35000	-0.923988447775921
chrMT	B12	2	251.842	35001	36000	1.8068909823265
chrMT	B12	2	268.9	36001	37000	1.90144183438967
chrMT	B12	2	165.239	37001	38000	1.19892631355233
chrMT	B12	2	217.425	38001	39000	1.59488991329935
chrMT	B12	2	205.776	39001	40000	1.5154468072802
chrMT	B12	2	186.985	40001	41000	1.37729462044906
chrMT	B12	2	135.239	41001	42000	0.909883332818176
chrMT	B12	2	312.887	42001	43000	2.12001379712126
chrMT	B12	2	419.21	43001	44000	2.5420452110789
chrMT	B12	2	245.128	44001	45000	1.76790736613333
chrMT	B12	2	261.762	45001	46000	1.86262775556575
chrMT	B12	2	342.365	46001	47000	2.24990730163242
chrMT	B12	2	339.776	47001	48000	2.2389560308658
chrMT	B12	2	2453.257	48001	49000	5.09099855072735
chrMT	B12	2	477.353	49001	50000	2.72942860537042
chrMT	B12	2	1018.988	50001	51000	3.82343723593069
chrMT	B12	2	587.463	51001	52000	3.02887006890337
chrMT	B12	2	262.12	52001	53000	1.86459951601957
chrMT	B12	2	336.099	53001	54000	2.22325832936069
chrMT	B12	2	773.103	54001	55000	3.42503271543766
chrMT	B12	2	691.48	55001	56000	3.26405960341352
chrMT	B12	2	622.5	56001	57000	3.1124459163596
chrMT	B12	2	1019.49	57001	58000	3.82414779834556
chrMT	B12	2	456.018	58001	59000	2.6634628509334
chrMT	B12	2	407.597	59001	60000	2.5015155121815
chrMT	B12	2	2251.708	60001	61000	4.96731992587801
chrMT	B12	2	1797.503	61001	62000	4.64229435256476
chrMT	B12	2	790.447	62001	63000	3.45704081133805
chrMT	B12	2	773.354	63001	64000	3.42550103296404
chrMT	B12	2	411.421	64001	65000	2.51498751383569
chrMT	B12	2	345.234	65001	66000	2.26194663296548
chrMT	B12	2	487.634	66001	67000	2.7601707997254
chrMT	B12	2	159.4	67001	68000	1.14702370850727
chrMT	B12	2	351.92	68001	69000	2.28961958553956
chrMT	B12	2	223.37	69001	70000	1.63380751496635
chrMT	B12	2	454.66	70001	71000	2.65916016366586
chrMT	B12	2	145.567	71001	72000	1.0160554132017
chrMT	B12	2	194.269	72001	73000	1.43242778393949
chrMT	B12	2	154.607	73001	74000	1.10297771950674
chrMT	B12	2	184.137	74001	75000	1.35515162630757
chrMT	B12	2	252.44	75001	76000	1.81031260768236
chrMT	B12	2	33.556	76001	77000	-1.10098526429603
chrMT	B12	3	224.111	1	1000	1.42339812777802
chrMT	B12	3	75.558	1001	2000	-0.145158914756552
chrMT	B12	3	75.976	2001	3000	-0.137199670538852
chrMT	B12	3	122.772	3001	4000	0.55516623558294
chrMT	B12	3	189.195	4001	5000	1.17905862763324
chrMT	B12	3	94.617	5001	6000	0.179355989129284
chrMT	B12	3	69.888	6001	7000	-0.257698667866942
chrMT	B12	3	168.459	7001	8000	1.0115821728186
chrMT	B12	3	161.538	8001	9000	0.951058248295965
chrMT	B12	3	89.14	9001	10000	0.0933295317132217
chrMT	B12	3	93.055	10001	11000	0.155340241535044
chrMT	B12	3	176.983	11001	12000	1.08279545537318
chrMT	B12	3	132.751	12001	13000	0.667907394397766
chrMT	B12	3	106.59	13001	14000	0.351256760152946
chrMT	B12	3	123.42	14001	15000	0.562760865346658
chrMT	B12	3	125.889	15001	16000	0.591336893593658
chrMT	B12	3	200.307	16001	17000	1.26139750461804
chrMT	B12	3	1033.711	17001	18000	3.62894566075089
chrMT	B12	3	350.144	18001	19000	2.06713303159578
chrMT	B12	3	765.641	19001	20000	3.19585275371964
chrMT	B12	3	247.846	20001	21000	1.56862864091284
chrMT	B12	3	668.117	21001	22000	2.99928543382732
chrMT	B12	3	415.622	22001	23000	2.31445668767573
chrMT	B12	3	308.152	23001	24000	1.88282682031558
chrMT	B12	3	1448.877	24001	25000	4.11604788543771
chrMT	B12	3	667.755	25001	26000	2.99850353912844
chrMT	B12	3	756.994	26001	27000	3.17946653098051
chrMT	B12	3	565.463	27001	28000	2.75861729293695
chrMT	B12	3	88.974	28001	29000	0.0906403837952904
chrMT	B12	3	148.643	29001	30000	0.831036190092521
chrMT	B12	3	311.749	30001	31000	1.89956959796686
chrMT	B12	3	254.586	31001	32000	1.60733775148037
chrMT	B12	3	67.864	32001	33000	-0.300096962199195
chrMT	B12	3	137.102	33001	34000	0.714434282493167
chrMT	B12	3	40.792	34001	35000	-1.03445718615824
chrMT	B12	3	204.235	35001	36000	1.28941478945411
chrMT	B12	3	229.422	36001	37000	1.45718840822023
chrMT	B12	3	142.864	37001	38000	0.773827086179806
chrMT	B12	3	176.414	38001	39000	1.07814972160848
chrMT	B12	3	186.627	39001	40000	1.15934238682495
chrMT	B12	3	171.916	40001	41000	1.04088848647799
chrMT	B12	3	123.96	41001	42000	0.569059325686783
chrMT	B12	3	264.753	42001	43000	1.66383169759417
chrMT	B12	3	353.747	43001	44000	2.08190257867305
chrMT	B12	3	206.485	44001	45000	1.30522164723845
chrMT	B12	3	196.297	45001	46000	1.2322227899661
chrMT	B12	3	240.967	46001	47000	1.52802025112525
chrMT	B12	3	242.909	47001	48000	1.53960060978117
chrMT	B12	3	2148.029	48001	49000	4.68412623145557
chrMT	B12	3	399.078	49001	50000	2.25585541514383
chrMT	B12	3	715.393	50001	51000	3.09792066752426
chrMT	B12	3	575.75	51001	52000	2.78462717166814
chrMT	B12	3	211.309	52001	53000	1.33853888100074
chrMT	B12	3	276.232	53001	54000	1.72506512343262
chrMT	B12	3	573.965	54001	55000	2.78014743065907
chrMT	B12	3	448.195	55001	56000	2.42331122008636
chrMT	B12	3	353.768	56001	57000	2.08198822094457
chrMT	B12	3	473.926	57001	58000	2.50384647631905
chrMT	B12	3	366.802	58001	59000	2.13418617094671
chrMT	B12	3	346.858	59001	60000	2.05352982521322
chrMT	B12	3	1751.663	60001	61000	4.38983800408701
chrMT	B12	3	1387.43	61001	62000	4.05352774554938
chrMT	B12	3	521.894	62001	63000	2.64294148163412
chrMT	B12	3	489.055	63001	64000	2.5491813880162
chrMT	B12	3	212.24	64001	65000	1.34488124632926
chrMT	B12	3	167.622	65001	66000	1.00439617750324
chrMT	B12	3	220.085	66001	67000	1.39724548664935
chrMT	B12	3	84.089	67001	68000	0.00917365919326807
chrMT	B12	3	163.289	68001	69000	0.966612272348958
chrMT	B12	3	106.136	69001	70000	0.345098748974163
chrMT	B12	3	199.658	70001	71000	1.25671554543013
chrMT	B12	3	75.886	71001	72000	-0.138909677899237
chrMT	B12	3	91.246	72001	73000	0.127017886830068
chrMT	B12	3	74.902	73001	74000	-0.157739187835573
chrMT	B12	3	80.473	74001	75000	-0.0542386124699233
chrMT	B12	3	98.011	75001	76000	0.230200246060634
chrMT	B12	3	15.276	76001	77000	-2.45147660416428
chrMT	B12	4	290.685	1	1000	1.82075526092374
chrMT	B12	4	116.931	1001	2000	0.506956092513638
chrMT	B12	4	100.7	2001	3000	0.291362317183521
chrMT	B12	4	169.342	3001	4000	1.04123846694816
chrMT	B12	4	439.64	4001	5000	2.41762128758804
chrMT	B12	4	216.049	5001	6000	1.39265718715305
chrMT	B12	4	125.203	6001	7000	0.605567765065181
chrMT	B12	4	293.101	7001	8000	1.83269652405181
chrMT	B12	4	263.405	8001	9000	1.67858136518397
chrMT	B12	4	157.34	9001	10000	0.93518412255547
chrMT	B12	4	156.107	10001	11000	0.923833864549015
chrMT	B12	4	284.712	11001	12000	1.79080193470139
chrMT	B12	4	230.063	12001	13000	1.4833276138863
chrMT	B12	4	194.946	13001	14000	1.24437318693617
chrMT	B12	4	202.623	14001	15000	1.30009657946161
chrMT	B12	4	222.171	15001	16000	1.43296914774568
chrMT	B12	4	348.817	16001	17000	2.08376898707877
chrMT	B12	4	1545.811	17001	18000	4.2315906663388
chrMT	B12	4	597.835	18001	19000	2.86104599530501
chrMT	B12	4	1107.785	19001	20000	3.75090463761166
chrMT	B12	4	826.267	20001	21000	3.32790668344056
chrMT	B12	4	1021.962	21001	22000	3.63456828172307
chrMT	B12	4	709.982	22001	23000	3.10908108262527
chrMT	B12	4	669.308	23001	24000	3.02396889226477
chrMT	B12	4	2798.67	24001	25000	5.08796811294641
chrMT	B12	4	1181.072	25001	26000	3.84332364509268
chrMT	B12	4	1368.426	26001	27000	4.05574414931172
chrMT	B12	4	1015.117	27001	28000	3.62487274736022
chrMT	B12	4	91.219	28001	29000	0.148704893504192
chrMT	B12	4	148.21	29001	30000	0.848941426041893
chrMT	B12	4	272.55	30001	31000	1.72781955413201
chrMT	B12	4	220.536	31001	32000	1.42231281244328
chrMT	B12	4	65.702	32001	33000	-0.324692173512121
chrMT	B12	4	122.529	33001	34000	0.574421878615206
chrMT	B12	4	34.133	34001	35000	-1.26946224043197
chrMT	B12	4	184.924	35001	36000	1.16823110808897
chrMT	B12	4	225.381	36001	37000	1.45366453283986
chrMT	B12	4	67.343	37001	38000	-0.289101469186256
chrMT	B12	4	41.906	38001	39000	-0.973472640738924
chrMT	B12	4	25.657	39001	40000	-1.68127697098525
chrMT	B12	4	24.486	40001	41000	-1.74867234461873
chrMT	B12	4	18.896	41001	42000	-2.12254859120083
chrMT	B12	4	40.56	42001	43000	-1.02057180870729
chrMT	B12	4	50.044	43001	44000	-0.717432352809211
chrMT	B12	4	31.91	44001	45000	-1.36662085243131
chrMT	B12	4	32.543	45001	46000	-1.33828220802142
chrMT	B12	4	57.973	46001	47000	-0.505248316592999
chrMT	B12	4	52.36	47001	48000	-0.652164363765385
chrMT	B12	4	267.701	48001	49000	1.70192116203061
chrMT	B12	4	62.447	49001	50000	-0.397997195685814
chrMT	B12	4	172.503	50001	51000	1.06792008585999
chrMT	B12	4	238.864	51001	52000	1.5374880705754
chrMT	B12	4	69.292	52001	53000	-0.247940663181835
chrMT	B12	4	93.317	53001	54000	0.181510466561908
chrMT	B12	4	152.909	54001	55000	0.893971957955745
chrMT	B12	4	156.819	55001	56000	0.930398999064621
chrMT	B12	4	115.341	56001	57000	0.487204069485794
chrMT	B12	4	136.763	57001	58000	0.732976608678402
chrMT	B12	4	129.249	58001	59000	0.651451752285247
chrMT	B12	4	113.199	59001	60000	0.460159847296488
chrMT	B12	4	564.004	60001	61000	2.77700402830633
chrMT	B12	4	535.072	61001	62000	2.70103166937862
chrMT	B12	4	97.537	62001	63000	0.24532013823028
chrMT	B12	4	106.994	63001	64000	0.378828529409631
chrMT	B12	4	45.075	64001	65000	-0.868301969390922
chrMT	B12	4	66.824	65001	66000	-0.300263117893101
chrMT	B12	4	569.353	66001	67000	2.79062203758714
chrMT	B12	4	6.577	67001	68000	-3.64512788566356
chrMT	B12	4	10.899	68001	69000	-2.91643368946135
chrMT	B12	4	8.586	69001	70000	-3.26057138315016
chrMT	B12	4	19.734	70001	71000	-2.05994604704143
chrMT	B12	4	6.115	71001	72000	-3.75020505718324
chrMT	B12	4	7.584	72001	73000	-3.43959859169973
chrMT	B12	4	5.606	73001	74000	-3.87558581156549
chrMT	B12	4	9.465	74001	75000	-3.11995505000692
chrMT	B12	4	15.456	75001	76000	-2.41246246176221
chrMT	B12	4	2.087	76001	77000	-5.30112695543815
chrMT	B12	5	203.386	1	1000	1.31452390074616
chrMT	B12	5	78.106	1001	2000	-0.0661911908191804
chrMT	B12	5	66.416	2001	3000	-0.300093732321253
chrMT	B12	5	188.42	3001	4000	1.20425563467391
chrMT	B12	5	484.941	4001	5000	2.56811275902785
chrMT	B12	5	221.197	5001	6000	1.43563534456345
chrMT	B12	5	132.414	6001	7000	0.695359190427413
chrMT	B12	5	328.524	7001	8000	2.00630229458684
chrMT	B12	5	263.008	8001	9000	1.6854102086219
chrMT	B12	5	163.475	9001	10000	0.999373548796483
chrMT	B12	5	162.255	10001	11000	0.988566462066468
chrMT	B12	5	296.882	11001	12000	1.8601931506723
chrMT	B12	5	263.822	12001	13000	1.68986840081976
chrMT	B12	5	186.758	13001	14000	1.19147356939996
chrMT	B12	5	243.506	14001	15000	1.57426084633538
chrMT	B12	5	296.792	15001	16000	1.85975573028779
chrMT	B12	5	393.2	16001	17000	2.26556684719044
chrMT	B12	5	1267.236	17001	18000	3.95391684600187
chrMT	B12	5	472.408	18001	19000	2.53033692179359
chrMT	B12	5	961.889	19001	20000	3.55617394509038
chrMT	B12	5	498.639	20001	21000	2.60829925011074
chrMT	B12	5	829.869	21001	22000	3.34318714153002
chrMT	B12	5	543.075	22001	23000	2.73145497705214
chrMT	B12	5	447.66	23001	24000	2.45270693962172
chrMT	B12	5	1998.155	24001	25000	4.61090011997505
chrMT	B12	5	1669.873	25001	26000	4.35197000499242
chrMT	B12	5	2998.182	26001	27000	5.19631958291384
chrMT	B12	5	1991.481	27001	28000	4.60607333593544
chrMT	B12	5	98.938	28001	29000	0.274900166797442
chrMT	B12	5	154.985	29001	30000	0.922432118606314
chrMT	B12	5	297.474	30001	31000	1.86306710415017
chrMT	B12	5	255.074	31001	32000	1.64121937630368
chrMT	B12	5	68.087	32001	33000	-0.264245201767839
chrMT	B12	5	121.468	33001	34000	0.570879820232875
chrMT	B12	5	28.281	34001	35000	-1.53179143545391
chrMT	B12	5	143.042	35001	36000	0.806742338915325
chrMT	B12	5	152.509	36001	37000	0.899197908333318
chrMT	B12	5	67.372	37001	38000	-0.279475441680712
chrMT	B12	5	53.823	38001	39000	-0.603401762854523
chrMT	B12	5	37.737	39001	40000	-1.11564483263616
chrMT	B12	5	31.336	40001	41000	-1.38380353597411
chrMT	B12	5	24.476	41001	42000	-1.7402567650901
chrMT	B12	5	58.455	42001	43000	-0.484298137147305
chrMT	B12	5	77.287	43001	44000	-0.0813988022211646
chrMT	B12	5	45.527	44001	45000	-0.844902173223198
chrMT	B12	5	38.392	45001	46000	-1.09081885120867
chrMT	B12	5	75.393	46001	47000	-0.117193989304488
chrMT	B12	5	56.398	47001	48000	-0.535980567057058
chrMT	B12	5	368.769	48001	49000	2.17302090843207
chrMT	B12	5	79.684	49001	50000	-0.0373344993373952
chrMT	B12	5	172.295	50001	51000	1.07518436067974
chrMT	B12	5	227.914	51001	52000	1.47879307280151
chrMT	B12	5	75.755	52001	53000	-0.110283456537064
chrMT	B12	5	87.29	53001	54000	0.0941918178497762
chrMT	B12	5	190.005	54001	55000	1.21634090922761
chrMT	B12	5	193.101	55001	56000	1.2396591610139
chrMT	B12	5	115.875	56001	57000	0.502872864362757
chrMT	B12	5	144.316	57001	58000	0.819534782659284
chrMT	B12	5	110.935	58001	59000	0.440018133212761
chrMT	B12	5	101.387	59001	60000	0.310176205093045
chrMT	B12	5	515.719	60001	61000	2.65688872346489
chrMT	B12	5	454.062	61001	62000	2.47319282960407
chrMT	B12	5	140.021	62001	63000	0.77594674070963
chrMT	B12	5	161.372	63001	64000	0.980693800747883
chrMT	B12	5	73.882	64001	65000	-0.146401648493238
chrMT	B12	5	75.393	65001	66000	-0.117193989304488
chrMT	B12	5	280.407	66001	67000	1.77782589033564
chrMT	B12	5	21.648	67001	68000	-1.91739082494832
chrMT	B12	5	40.895	68001	69000	-0.999700105576647
chrMT	B12	5	25.516	69001	70000	-1.68022238574545
chrMT	B12	5	44.766	70001	71000	-0.869221155265642
chrMT	B12	5	19.954	71001	72000	-2.03494658975904
chrMT	B12	5	20.177	72001	73000	-2.01891288486501
chrMT	B12	5	21.457	73001	74000	-1.9301761888855
chrMT	B12	5	23.351	74001	75000	-1.80814023510861
chrMT	B12	5	45.108	75001	76000	-0.858241248160688
chrMT	B12	5	7.232	76001	77000	-3.49915798650967
chrMT	B12	7	34.493	1	1000	-1.11138214116346
chrMT	B12	7	11.946	1001	2000	-2.6411581257288
chrMT	B12	7	10.452	2001	3000	-2.83390672285044
chrMT	B12	7	11.892	3001	4000	-2.64769438426282
chrMT	B12	7	34.486	4001	5000	-1.11167495101344
chrMT	B12	7	18.753	5001	6000	-1.99056434427048
chrMT	B12	7	12.05	6001	7000	-2.62865260616578
chrMT	B12	7	39.787	7001	8000	-0.905388630877391
chrMT	B12	7	38.55	8001	9000	-0.950954892480703
chrMT	B12	7	20.159	9001	10000	-1.88626167781211
chrMT	B12	7	22.37	10001	11000	-1.73612049622398
chrMT	B12	7	45.082	11001	12000	-0.725134232539502
chrMT	B12	7	33.263	12001	13000	-1.16376746102706
chrMT	B12	7	26.604	13001	14000	-1.486042576582
chrMT	B12	7	30.392	14001	15000	-1.29399413550544
chrMT	B12	7	135.862	15001	16000	0.866384339375098
chrMT	B12	7	49.134	16001	17000	-0.600964058916622
chrMT	B12	7	420.14	17001	18000	2.49511248837279
chrMT	B12	7	96.865	18001	19000	0.37828972160727
chrMT	B12	7	208.439	19001	20000	1.4838675807394
chrMT	B12	7	217.118	20001	21000	1.54272167869502
chrMT	B12	7	159.455	21001	22000	1.09739167887883
chrMT	B12	7	119.323	22001	23000	0.679114497518709
chrMT	B12	7	92.929	23001	24000	0.318443130610913
chrMT	B12	7	392.052	24001	25000	2.39528736182811
chrMT	B12	7	2090.473	25001	26000	4.80999984718601
chrMT	B12	7	4238.674	26001	27000	5.82978344891847
chrMT	B12	7	2692.952	27001	28000	5.17535895218486
chrMT	B12	7	42.172	28001	29000	-0.821400309812097
chrMT	B12	7	72.963	29001	30000	-0.0305207029957826
chrMT	B12	7	147.341	30001	31000	0.983401281575109
chrMT	B12	7	112.073	31001	32000	0.58868109625386
chrMT	B12	7	28.091	32001	33000	-1.40757776933286
chrMT	B12	7	44.554	33001	34000	-0.742130791780454
chrMT	B12	7	12.134	34001	35000	-2.61863053613755
chrMT	B12	7	53.811	35001	36000	-0.469784635167935
chrMT	B12	7	12.953	36001	37000	-2.52439947834799
chrMT	B12	7	8.498	37001	38000	-3.13249050385718
chrMT	B12	7	6.614	38001	39000	-3.49409080197935
chrMT	B12	7	6.676	39001	40000	-3.48062989280786
chrMT	B12	7	6.46	40001	41000	-3.52807968258917
chrMT	B12	7	4.351	41001	42000	-4.09826683062993
chrMT	B12	7	8.213	42001	43000	-3.18170454943262
chrMT	B12	7	9.915	43001	44000	-2.91000107505425
chrMT	B12	7	5.099	44001	45000	-3.8693995095419
chrMT	B12	7	7.244	45001	46000	-3.36282730122029
chrMT	B12	7	8.142	46001	47000	-3.19423062603045
chrMT	B12	7	9.198	47001	48000	-3.01829364979053
chrMT	B12	7	42.154	48001	49000	-0.822016217388181
chrMT	B12	7	9.889	49001	50000	-2.91378920801872
chrMT	B12	7	16.14	50001	51000	-2.20704517400532
chrMT	B12	7	16.11	51001	52000	-2.20972925857653
chrMT	B12	7	6.093	52001	53000	-3.61246110715315
chrMT	B12	7	7.475	53001	54000	-3.31754026819763
chrMT	B12	7	13.256	54001	55000	-2.49104024494901
chrMT	B12	7	12.08	55001	56000	-2.62506529795802
chrMT	B12	7	12.322	56001	57000	-2.59644931185578
chrMT	B12	7	12.006	57001	58000	-2.63393017954356
chrMT	B12	7	14.418	58001	59000	-2.36981469831944
chrMT	B12	7	12.863	59001	60000	-2.53445859515188
chrMT	B12	7	72.013	60001	61000	-0.0494283829747791
chrMT	B12	7	54.065	61001	62000	-0.462990812305222
chrMT	B12	7	16.108	62001	63000	-2.20990837522471
chrMT	B12	7	17.179	63001	64000	-2.11703969385303
chrMT	B12	7	8.166	64001	65000	-3.18998427994531
chrMT	B12	7	3.248	65001	66000	-4.52006221498529
chrMT	B12	7	31.634	66001	67000	-1.23620976188422
chrMT	B12	7	0.158	67001	68000	-8.88161738399336
chrMT	B12	7	1.412	68001	69000	-5.72187375889928
chrMT	B12	7	1.39	69001	70000	-5.74452896455959
chrMT	B12	7	2.452	70001	71000	-4.92565486847968
chrMT	B12	7	0.587	71001	72000	-6.98818143906041
chrMT	B12	7	0.423	72001	73000	-7.46088427905051
chrMT	B12	7	0.864	73001	74000	-6.43051063000699
chrMT	B12	7	0.203	74001	75000	-8.52006221498529
chrMT	B12	7	2.142	75001	76000	-5.12065536742021
chrMT	B12	7	0.168	76001	77000	-8.7930807093917
chrMT	B12	9	4.518	1	1000	-4.40242420113778
chrMT	B12	9	1.82	1001	2000	-5.71417002144481
chrMT	B12	9	0.918	2001	3000	-6.70154241311706
chrMT	B12	9	2.704	3001	4000	-5.14301332024868
chrMT	B12	9	3.817	4001	5000	-4.64566928531531
chrMT	B12	9	2.274	5001	6000	-5.39287621763862
chrMT	B12	9	1.943	6001	7000	-5.61982257094552
chrMT	B12	9	3.335	7001	8000	-4.84042171045892
chrMT	B12	9	3.443	8001	9000	-4.79444229096095
chrMT	B12	9	1.889	9001	10000	-5.6604857701425
chrMT	B12	9	2.438	10001	11000	-5.29241034591065
chrMT	B12	9	2.73	11001	12000	-5.12920752072365
chrMT	B12	9	1.788	12001	13000	-5.73976173534755
chrMT	B12	9	3.189	13001	14000	-4.90500437427861
chrMT	B12	9	4.574	14001	15000	-4.38465210611919
chrMT	B12	9	128.53	15001	16000	0.427852853977032
chrMT	B12	9	19.764	16001	17000	-2.27330541608336
chrMT	B12	9	66.536	17001	18000	-0.52204523985026
chrMT	B12	9	19.717	18001	19000	-2.27674031889498
chrMT	B12	9	42.291	19001	20000	-1.17582970268744
chrMT	B12	9	13.981	20001	21000	-2.77271282288861
chrMT	B12	9	42.882	21001	22000	-1.1558081828743
chrMT	B12	9	28.207	22001	23000	-1.7601271430067
chrMT	B12	9	19.032	23001	24000	-2.32775320010573
chrMT	B12	9	134.017	24001	25000	0.488163735455296
chrMT	B12	9	2502.342	25001	26000	4.71095479173963
chrMT	B12	9	5236.294	26001	27000	5.77622191474309
chrMT	B12	9	3131.37	27001	28000	5.0344697989535
chrMT	B12	9	21.061	28001	29000	-2.18160643820611
chrMT	B12	9	48.652	29001	30000	-0.973681264045446
chrMT	B12	9	82.187	30001	31000	-0.217270164567772
chrMT	B12	9	66.916	31001	32000	-0.513829168195684
chrMT	B12	9	19.718	32001	33000	-2.27666715064133
chrMT	B12	9	26.096	33001	34000	-1.87235168981898
chrMT	B12	9	7.424	34001	35000	-3.68591176140329
chrMT	B12	9	29.299	35001	36000	-1.70532895191276
chrMT	B12	9	0.738	36001	37000	-7.01641575047047
chrMT	B12	9	0.588	37001	38000	-7.3442204116945
chrMT	B12	9	2.115	38001	39000	-5.49745080852355
chrMT	B12	9	4.498	39001	40000	-4.40882481075305
chrMT	B12	9	0.708	40001	41000	-7.07628720644787
chrMT	B12	9	0.247	41001	42000	-8.59552552494619
chrMT	B12	9	1.17	42001	43000	-6.3515999420601
chrMT	B12	9	2.174	43001	44000	-5.45775653150356
chrMT	B12	9	1.426	44001	45000	-6.06613449008698
chrMT	B12	9	1.512	45001	46000	-5.98165033230979
chrMT	B12	9	1.728	46001	47000	-5.7890052543674
chrMT	B12	9	1.118	47001	48000	-6.41718828368768
chrMT	B12	9	5.594	48001	49000	-4.09422821805467
chrMT	B12	9	1.258	49001	50000	-6.24697654965158
chrMT	B12	9	3.251	50001	51000	-4.87722491584051
chrMT	B12	9	3.487	51001	52000	-4.77612210775416
chrMT	B12	9	0.278	52001	53000	-8.42495168380736
chrMT	B12	9	2.154	53001	54000	-5.47109022198666
chrMT	B12	9	1.978	54001	55000	-5.59406604577176
chrMT	B12	9	1.402	55001	56000	-6.09062212252024
chrMT	B12	9	0.307	56001	57000	-8.28179791116069
chrMT	B12	9	0.903	57001	58000	-6.72531057905001
chrMT	B12	9	0.089	58001	59000	-10.0681593255645
chrMT	B12	9	0.01	59001	60000	-13.2219646616435
chrMT	B12	9	0.302	60001	61000	-8.30548801720579
chrMT	B12	9	1.389	61001	62000	-6.10406187254947
chrMT	B12	9	0.41	62001	63000	-7.86441265702542
chrMT	B12	9	0.295	63001	64000	-8.33932161228166
chrMT	B12	9	0.388	64001	65000	-7.94397991434374
chrMT	B12	9	0.01	65001	66000	-13.2219646616435
chrMT	B12	9	37.236	66001	67000	-1.35948227428099
chrMT	B12	9	0.052	67001	68000	-10.8434530383898
chrMT	B12	9	0.722	68001	69000	-7.0480377296437
chrMT	B12	9	0.46	69001	70000	-7.69840270558649
chrMT	B12	9	0.146	70001	71000	-9.35406819765085
chrMT	B12	9	0.274	71001	72000	-8.44586067357034
chrMT	B12	9	0.252	72001	73000	-8.56661283303095
chrMT	B12	9	0.491	73001	74000	-7.60431354221617
chrMT	B12	9	0.241	74001	75000	-8.6310034203009
chrMT	B12	9	0.457	75001	76000	-7.7078424014728
chrMT	B12	9	0.01	76001	77000	-13.2219646616435
chrMT	B12	0	778.945	1	1000	4.26877291084997
chrMT	B12	0	342.283	1001	2000	3.08244108575205
chrMT	B12	0	251.258	2001	3000	2.63642097736281
chrMT	B12	0	391.4	3001	4000	3.27589520120875
chrMT	B12	0	775.688	4001	5000	4.26272792837135
chrMT	B12	0	480.8	5001	6000	3.57268834129314
chrMT	B12	0	329.578	6001	7000	3.02787138815896
chrMT	B12	0	934.253	7001	8000	4.53106473652672
chrMT	B12	0	755.972	8001	9000	4.2255842455512
chrMT	B12	0	519.156	9001	10000	3.68341956110859
chrMT	B12	0	511.968	10001	11000	3.66330508421138
chrMT	B12	0	758.062	11001	12000	4.22956729289451
chrMT	B12	0	823.182	12001	13000	4.34846288132109
chrMT	B12	0	590.915	13001	14000	3.87020206651347
chrMT	B12	0	626.254	14001	15000	3.95399935834108
chrMT	B12	0	599.264	15001	16000	3.89044315374029
chrMT	B12	0	1052.916	16001	17000	4.70356988512054
chrMT	B12	0	2135.164	17001	18000	5.72352642632371
chrMT	B12	0	401.012	18001	19000	3.3108968541972
chrMT	B12	0	696.141	19001	20000	4.10663099183313
chrMT	B12	0	269.445	20001	21000	2.73724226061474
chrMT	B12	0	595.876	21001	22000	3.88226358667401
chrMT	B12	0	325.834	22001	23000	3.01138859874556
chrMT	B12	0	323.773	23001	24000	3.0022341270234
chrMT	B12	0	792.799	24001	25000	4.29420658802077
chrMT	B12	0	574.189	25001	26000	3.82877713768837
chrMT	B12	0	661.941	26001	27000	4.03395407798544
chrMT	B12	0	717.136	27001	28000	4.14949818749027
chrMT	B12	0	659.184	28001	29000	4.02793267047028
chrMT	B12	0	780.013	29001	30000	4.2707496139359
chrMT	B12	0	1294.774	30001	31000	5.00187984072032
chrMT	B12	0	1076.664	31001	32000	4.73574763108653
chrMT	B12	0	282.745	32001	33000	2.80675295738492
chrMT	B12	0	533.441	33001	34000	3.72258015919077
chrMT	B12	0	194.728	34001	35000	2.26871178978898
chrMT	B12	0	723.257	35001	36000	4.16175982650491
chrMT	B12	0	708.495	36001	37000	4.13200911701731
chrMT	B12	0	688.091	37001	38000	4.08985081913523
chrMT	B12	0	688.691	38001	39000	4.09110826886849
chrMT	B12	0	482.254	39001	40000	3.57704464983512
chrMT	B12	0	500.278	40001	41000	3.62998145566227
chrMT	B12	0	355.599	41001	42000	3.13750271233335
chrMT	B12	0	855.287	42001	43000	4.40366005705438
chrMT	B12	0	1071.283	43001	44000	4.72851918619899
chrMT	B12	0	601.582	44001	45000	3.89601284587123
chrMT	B12	0	566.164	45001	46000	3.8084714624625
chrMT	B12	0	601.292	46001	47000	3.8953172093042
chrMT	B12	0	419.397	47001	48000	3.37556798693462
chrMT	B12	0	2332.04	48001	49000	5.85077207451317
chrMT	B12	0	582.838	49001	50000	3.85034638686121
chrMT	B12	0	993.219	50001	51000	4.61936330537296
chrMT	B12	0	1098.195	51001	52000	4.76431378805815
chrMT	B12	0	367.241	52001	53000	3.18397858023398
chrMT	B12	0	417.339	53001	54000	3.36847119085744
chrMT	B12	0	800.599	54001	55000	4.30833125895108
chrMT	B12	0	842.409	55001	56000	4.38177229493389
chrMT	B12	0	515.639	56001	57000	3.67361283031434
chrMT	B12	0	801.104	57001	58000	4.30924099192878
chrMT	B12	0	605.96	58001	59000	3.90647400840387
chrMT	B12	0	530.674	59001	60000	3.71507731189457
chrMT	B12	0	2189.226	60001	61000	5.75960043583307
chrMT	B12	0	2001.599	61001	62000	5.63033251397669
chrMT	B12	0	836.258	62001	63000	4.37119955249903
chrMT	B12	0	1053.732	63001	64000	4.70468752718722
chrMT	B12	0	621.613	64001	65000	3.94326812086774
chrMT	B12	0	310.862	65001	66000	2.94352571659595
chrMT	B12	0	284.59	66001	67000	2.8161364141925
chrMT	B12	0	486.441	67001	68000	3.58951627765185
chrMT	B12	0	1069.86	68001	69000	4.72660156057058
chrMT	B12	0	803.223	69001	70000	4.31305202617473
chrMT	B12	0	1457.812	70001	71000	5.17298422128069
chrMT	B12	0	567.683	71001	72000	3.81233698413898
chrMT	B12	0	551.857	72001	73000	3.77154592217866
chrMT	B12	0	1067.471	73001	74000	4.72337641679263
chrMT	B12	0	780.959	74001	75000	4.27249825475171
chrMT	B12	0	750.672	75001	76000	4.21543411684555
chrMT	B12	0	156.546	76001	77000	1.95383809103209
chrMT	B5	1	25.516	1	1000	-1.78405060055521
chrMT	B5	1	11.118	1001	2000	-2.9825554969862
chrMT	B5	1	9.178	2001	3000	-3.25920107232235
chrMT	B5	1	53.254	3001	4000	-0.722562891458312
chrMT	B5	1	40.299	4001	5000	-1.12470874476048
chrMT	B5	1	55.628	5001	6000	-0.659641547045032
chrMT	B5	1	126.048	6001	7000	0.520448537879421
chrMT	B5	1	269.657	7001	8000	1.61760079581789
chrMT	B5	1	213.182	8001	9000	1.27856094013591
chrMT	B5	1	111.553	9001	10000	0.344204623270567
chrMT	B5	1	101.492	10001	11000	0.207841323677263
chrMT	B5	1	168.958	11001	12000	0.943139973054048
chrMT	B5	1	137.967	12001	13000	0.650798544157592
chrMT	B5	1	93.034	13001	14000	0.0823052725424613
chrMT	B5	1	114.771	14001	15000	0.385233462807149
chrMT	B5	1	174.321	15001	16000	0.988221688375249
chrMT	B5	1	225.584	16001	17000	1.36014005601317
chrMT	B5	1	1515.941	17001	18000	4.10861701090344
chrMT	B5	1	387.415	18001	19000	2.14035512423724
chrMT	B5	1	881.785	19001	20000	3.32690224625227
chrMT	B5	1	288.956	20001	21000	1.71732513763379
chrMT	B5	1	633.402	21001	22000	2.84959673346066
chrMT	B5	1	378.624	22001	23000	2.10724117336445
chrMT	B5	1	283.892	23001	24000	1.69181750558012
chrMT	B5	1	1340.705	24001	25000	3.93139523652604
chrMT	B5	1	1158.112	25001	26000	3.72017818744097
chrMT	B5	1	1261.819	26001	27000	3.84390838522057
chrMT	B5	1	470.236	27001	28000	2.41986030276276
chrMT	B5	1	40.606	28001	29000	-1.11375986636364
chrMT	B5	1	73.831	29001	30000	-0.25122608503039
chrMT	B5	1	124.646	30001	31000	0.50431189691903
chrMT	B5	1	117.83	31001	32000	0.423182212697542
chrMT	B5	1	43.243	32001	33000	-1.02298617010919
chrMT	B5	1	119.824	33001	34000	0.447392210591792
chrMT	B5	1	30.675	34001	35000	-1.51838944029699
chrMT	B5	1	168.604	35001	36000	0.940114074216522
chrMT	B5	1	186.678	36001	37000	1.08702722669124
chrMT	B5	1	161.048	37001	38000	0.873966055198154
chrMT	B5	1	217.911	38001	39000	1.31021433526477
chrMT	B5	1	214.804	39001	40000	1.28949616960481
chrMT	B5	1	183.764	40001	41000	1.06432947608615
chrMT	B5	1	148.361	41001	42000	0.755587207908774
chrMT	B5	1	350.681	42001	43000	1.99663457776757
chrMT	B5	1	453.239	43001	44000	2.36674731723969
chrMT	B5	1	242.533	44001	45000	1.46465637015565
chrMT	B5	1	232.775	45001	46000	1.40541143203787
chrMT	B5	1	284.717	46001	47000	1.69600394738434
chrMT	B5	1	281.851	47001	48000	1.68140799683479
chrMT	B5	1	1645.907	48001	49000	4.22728622589994
chrMT	B5	1	374.088	49001	50000	2.08985299854185
chrMT	B5	1	760.516	50001	51000	3.11345391089106
chrMT	B5	1	625.285	51001	52000	2.83098921946702
chrMT	B5	1	276.631	52001	53000	1.65443814846411
chrMT	B5	1	355.208	53001	54000	2.01513938515585
chrMT	B5	1	702.389	54001	55000	2.99874556193976
chrMT	B5	1	583.755	55001	56000	2.73183831260254
chrMT	B5	1	423.554	56001	57000	2.26902122492509
chrMT	B5	1	582.907	57001	58000	2.72974103745322
chrMT	B5	1	527.574	58001	59000	2.5858487778782
chrMT	B5	1	482.469	59001	60000	2.45691155881753
chrMT	B5	1	2541.018	60001	61000	4.8538100007442
chrMT	B5	1	2223.711	61001	62000	4.6613727089572
chrMT	B5	1	981.252	62001	63000	3.48109900011574
chrMT	B5	1	580.568	63001	64000	2.72394036576427
chrMT	B5	1	215.686	64001	65000	1.29540784609686
chrMT	B5	1	168.347	65001	66000	0.937913322787342
chrMT	B5	1	151.882	66001	67000	0.789426212474516
chrMT	B5	1	22.616	67001	68000	-1.95810899590345
chrMT	B5	1	38.886	68001	69000	-1.17620194429499
chrMT	B5	1	28.962	69001	70000	-1.60129155156886
chrMT	B5	1	59.608	70001	71000	-0.559946816152182
chrMT	B5	1	21.134	71001	72000	-2.0558869343749
chrMT	B5	1	16.775	72001	73000	-2.38914001775971
chrMT	B5	1	20.861	73001	74000	-2.07464446714909
chrMT	B5	1	24.696	74001	75000	-1.8311753961195
chrMT	B5	1	26.293	75001	76000	-1.74077402305087
chrMT	B5	1	2.63	76001	77000	-5.06231807955496
chrMT	B5	15	0.265	1	1000	-7.8186846658093
chrMT	B5	15	0.365	1001	2000	-7.35678056149248
chrMT	B5	15	0.104	2001	3000	-9.16809349711877
chrMT	B5	15	0.9	3001	4000	-6.05475202404283
chrMT	B5	15	0.716	4001	5000	-6.38471743799561
chrMT	B5	15	0.453	5001	6000	-7.04516597521363
chrMT	B5	15	0.297	6001	7000	-7.6542140944591
chrMT	B5	15	0.66	7001	8000	-6.50221100101405
chrMT	B5	15	0.249	8001	9000	-7.90853128319178
chrMT	B5	15	0.326	9001	10000	-7.51980506102878
chrMT	B5	15	0.361	10001	11000	-7.37267818837269
chrMT	B5	15	0.594	11001	12000	-6.6542140944591
chrMT	B5	15	0.271	12001	13000	-7.78638417390599
chrMT	B5	15	0.112	13001	14000	-9.06117829320226
chrMT	B5	15	0.375	14001	15000	-7.31778642987662
chrMT	B5	15	0.179	15001	16000	-8.38471743799561
chrMT	B5	15	1.404	16001	17000	-5.4132059949553
chrMT	B5	15	3.417	17001	18000	-4.13001868283059
chrMT	B5	15	0.83	18001	19000	-6.17156568902558
chrMT	B5	15	0.323	19001	20000	-7.53314286056594
chrMT	B5	15	0.109	20001	21000	-9.10034889048294
chrMT	B5	15	88.813	21001	22000	0.569950030761711
chrMT	B5	15	45.76	22001	23000	-0.38673378359411
chrMT	B5	15	34.742	23001	24000	-0.784140027343505
chrMT	B5	15	123.854	24001	25000	1.04974772192332
chrMT	B5	15	9.348	25001	26000	-2.67809119647704
chrMT	B5	15	0.266	26001	27000	-7.81325077975867
chrMT	B5	15	1.063	27001	28000	-5.81460733372876
chrMT	B5	15	0.268	28001	29000	-7.80244402480209
chrMT	B5	15	0.288	29001	30000	-7.69860821381755
chrMT	B5	15	0.2	30001	31000	-8.22467702548514
chrMT	B5	15	0.911	31001	32000	-6.03722597145781
chrMT	B5	15	0.324	32001	33000	-7.52868321237524
chrMT	B5	15	0.01	33001	34000	-12.5466051203725
chrMT	B5	15	0.338	34001	35000	-7.46765377897768
chrMT	B5	15	0.276	35001	36000	-7.76000875848169
chrMT	B5	15	0.458	36001	37000	-7.02932942716292
chrMT	B5	15	0.383	37001	38000	-7.2873326333349
chrMT	B5	15	1.04	38001	39000	-5.84616540223141
chrMT	B5	15	0.223	39001	40000	-8.06763331533956
chrMT	B5	15	0.168	40001	41000	-8.4762157924811
chrMT	B5	15	0.125	41001	42000	-8.90274893059778
chrMT	B5	15	0.313	42001	43000	-7.57851436832724
chrMT	B5	15	0.521	43001	44000	-6.84339365298135
chrMT	B5	15	0.515	44001	45000	-6.86010459318928
chrMT	B5	15	3.204	45001	46000	-4.22287478285115
chrMT	B5	15	0.537	46001	47000	-6.79975493727445
chrMT	B5	15	0.24	47001	48000	-7.96164261965134
chrMT	B5	15	1.686	48001	49000	-5.14914439431778
chrMT	B5	15	0.437	49001	50000	-7.09704374575926
chrMT	B5	15	0.059	50001	51000	-9.98589016589802
chrMT	B5	15	2.407	51001	52000	-4.63551278878537
chrMT	B5	15	0.132	52001	53000	-8.82413909590141
chrMT	B5	15	3147.786	53001	54000	5.71737281764378
chrMT	B5	15	5966.423	54001	55000	6.63990161775304
chrMT	B5	15	149.477	55001	56000	1.32103077344205
chrMT	B5	15	83.853	56001	57000	0.487041564151946
chrMT	B5	15	89.239	57001	58000	0.576853511319375
chrMT	B5	15	145.895	58001	59000	1.28603770035729
chrMT	B5	15	122.486	59001	60000	1.03372411954915
chrMT	B5	15	527.77	60001	61000	3.1410166051399
chrMT	B5	15	478.136	61001	62000	2.99852829290312
chrMT	B5	15	230.8	62001	63000	1.94775048316034
chrMT	B5	15	219.64	63001	64000	1.87624807557176
chrMT	B5	15	98.019	64001	65000	0.712240592587959
chrMT	B5	15	35.68	65001	66000	-0.745705220452195
chrMT	B5	15	0.598	66001	67000	-6.64453154106176
chrMT	B5	15	0.156	67001	68000	-8.58313099639761
chrMT	B5	15	0.4	68001	69000	-7.22467702548514
chrMT	B5	15	0.515	69001	70000	-6.86010459318928
chrMT	B5	15	0.557	70001	71000	-6.74699969791983
chrMT	B5	15	0.343	71001	72000	-7.44646844908705
chrMT	B5	15	0.222	72001	73000	-8.07411734890976
chrMT	B5	15	0.232	73001	74000	-8.01055222013229
chrMT	B5	15	0.127	74001	75000	-8.8798485284877
chrMT	B5	15	0.368	75001	76000	-7.34497125920285
chrMT	B5	15	0.246	76001	77000	-7.92601870992062
chrMT	B5	2	13.521	1	1000	-1.89690453110267
chrMT	B5	2	6.017	1001	2000	-3.06499012510933
chrMT	B5	2	5.243	2001	3000	-3.26364193602283
chrMT	B5	2	21.66	3001	4000	-1.2170731440435
chrMT	B5	2	70.885	4001	5000	0.493373983562206
chrMT	B5	2	85.153	5001	6000	0.757950970969054
chrMT	B5	2	223.179	6001	7000	2.14802299124218
chrMT	B5	2	488.602	7001	8000	3.27848147691453
chrMT	B5	2	372.902	8001	9000	2.88861824269313
chrMT	B5	2	253.544	9001	10000	2.33205784200374
chrMT	B5	2	218.475	10001	11000	2.11728991009704
chrMT	B5	2	313.219	11001	12000	2.63699343768613
chrMT	B5	2	286.652	12001	13000	2.5091220527985
chrMT	B5	2	207.822	13001	14000	2.04517009366469
chrMT	B5	2	244.623	14001	15000	2.2803817635453
chrMT	B5	2	238.209	15001	16000	2.24204962995809
chrMT	B5	2	100.754	16001	17000	1.00065882372888
chrMT	B5	2	395.22	17001	18000	2.97247766385547
chrMT	B5	2	195.187	18001	19000	1.95467867647421
chrMT	B5	2	394.235	19001	20000	2.96887757175983
chrMT	B5	2	232.764	20001	21000	2.20868965172099
chrMT	B5	2	441.257	21001	22000	3.13144087304673
chrMT	B5	2	294.365	22001	23000	2.54742785304187
chrMT	B5	2	205.573	23001	24000	2.02947250100906
chrMT	B5	2	969.63	24001	25000	4.26725604385955
chrMT	B5	2	656.135	25001	26000	3.70381438827876
chrMT	B5	2	547.587	26001	27000	3.44290990456985
chrMT	B5	2	236.298	27001	28000	2.23042912645063
chrMT	B5	2	30.863	28001	29000	-0.706228082865835
chrMT	B5	2	50.069	29001	30000	-0.00818874541763788
chrMT	B5	2	86.263	30001	31000	0.776635503089888
chrMT	B5	2	62.875	31001	32000	0.320380107928427
chrMT	B5	2	19.882	32001	33000	-1.34064349704371
chrMT	B5	2	34.418	33001	34000	-0.548943120928121
chrMT	B5	2	9.611	34001	35000	-2.38934793433448
chrMT	B5	2	52.935	35001	36000	0.0721155438490553
chrMT	B5	2	60.067	36001	37000	0.254466224382514
chrMT	B5	2	47.787	37001	38000	-0.0754881869085048
chrMT	B5	2	69.151	38001	39000	0.457643727504027
chrMT	B5	2	64.923	39001	40000	0.366623279333666
chrMT	B5	2	62.484	40001	41000	0.311380425572218
chrMT	B5	2	50.433	41001	42000	0.0022616593721724
chrMT	B5	2	126.279	42001	43000	1.32643644904322
chrMT	B5	2	158.915	43001	44000	1.65807701511559
chrMT	B5	2	106.391	44001	45000	1.07919782110003
chrMT	B5	2	84.837	45001	46000	0.752587218300625
chrMT	B5	2	103.496	46001	47000	1.0393967182147
chrMT	B5	2	88.873	47001	48000	0.819638801665826
chrMT	B5	2	490.245	48001	49000	3.28332462436912
chrMT	B5	2	119.399	49001	50000	1.2456124615767
chrMT	B5	2	242.803	50001	51000	2.26960795510236
chrMT	B5	2	166.19	51001	52000	1.72265528263855
chrMT	B5	2	54.241	52001	53000	0.107277389599229
chrMT	B5	2	78.667	53001	54000	0.643652179865214
chrMT	B5	2	131.931	54001	55000	1.3896053042648
chrMT	B5	2	111.925	55001	56000	1.15235402613908
chrMT	B5	2	90.529	56001	57000	0.8462736312201
chrMT	B5	2	146.279	57001	58000	1.53854437709744
chrMT	B5	2	170.021	58001	59000	1.75553465852385
chrMT	B5	2	161.072	59001	60000	1.67752743240753
chrMT	B5	2	797.901	60001	61000	3.98603146227841
chrMT	B5	2	602.74	61001	62000	3.58135751831259
chrMT	B5	2	245.128	62001	63000	2.28335699485207
chrMT	B5	2	259.762	63001	64000	2.36701210549912
chrMT	B5	2	446.916	64001	65000	3.14982540335208
chrMT	B5	2	500.978	65001	66000	3.31456895804907
chrMT	B5	2	550.753	66001	67000	3.45122715633188
chrMT	B5	2	137.814	67001	68000	1.45254416128549
chrMT	B5	2	20.925	68001	69000	-1.26687876421412
chrMT	B5	2	16.22	69001	70000	-1.63433256743455
chrMT	B5	2	29.164	70001	71000	-0.787917780342767
chrMT	B5	2	10.478	71001	72000	-2.26474301987013
chrMT	B5	2	11.258	72001	73000	-2.16115583367137
chrMT	B5	2	11.245	73001	74000	-2.16282272587401
chrMT	B5	2	13.294	74001	75000	-1.9213311279815
chrMT	B5	2	15.355	75001	76000	-1.71339787467595
chrMT	B5	2	2.69	76001	77000	-4.2264283090952
chrMT	B5	3	23.481	1	1000	-1.10233057598812
chrMT	B5	3	12.137	1001	2000	-2.05441256358774
chrMT	B5	3	9.361	2001	3000	-2.42908986592462
chrMT	B5	3	57.987	3001	4000	0.201905074615859
chrMT	B5	3	167.69	4001	5000	1.73390032619931
chrMT	B5	3	120.693	5001	6000	1.25944567271484
chrMT	B5	3	169.239	6001	7000	1.74716573441947
chrMT	B5	3	445.689	7001	8000	3.14414102258512
chrMT	B5	3	370.366	8001	9000	2.87705533189826
chrMT	B5	3	234.38	9001	10000	2.21695313585073
chrMT	B5	3	214.227	10001	11000	2.08724398913286
chrMT	B5	3	331.839	11001	12000	2.71858711988395
chrMT	B5	3	293.339	12001	13000	2.54067256119362
chrMT	B5	3	228.3	13001	14000	2.17903452775154
chrMT	B5	3	311.93	14001	15000	2.6293259793809
chrMT	B5	3	275.266	15001	16000	2.44893009192328
chrMT	B5	3	98.612	16001	17000	0.967938790767702
chrMT	B5	3	263.664	17001	18000	2.38680427099176
chrMT	B5	3	99.814	18001	19000	0.985417756740157
chrMT	B5	3	204.419	19001	20000	2.01963296393536
chrMT	B5	3	96.005	20001	21000	0.929285117545359
chrMT	B5	3	294.625	21001	22000	2.54698352166437
chrMT	B5	3	172.502	22001	23000	1.77471675688179
chrMT	B5	3	118.113	23001	24000	1.22827143058162
chrMT	B5	3	643.366	24001	25000	3.6737433640063
chrMT	B5	3	332.992	25001	26000	2.72359118572881
chrMT	B5	3	245.094	26001	27000	2.28143883506933
chrMT	B5	3	99.024	27001	28000	0.973953800359756
chrMT	B5	3	6.585	28001	29000	-2.93656908110401
chrMT	B5	3	10.818	29001	30000	-2.22039062409439
chrMT	B5	3	21.321	30001	31000	-1.24154932156534
chrMT	B5	3	16.506	31001	32000	-1.61083388121052
chrMT	B5	3	7.08	32001	33000	-2.83200316127752
chrMT	B5	3	28.514	33001	34000	-0.822153989128061
chrMT	B5	3	10.027	34001	35000	-2.32993439926506
chrMT	B5	3	39.937	35001	36000	-0.336098462661613
chrMT	B5	3	45.923	36001	37000	-0.134607535038717
chrMT	B5	3	29.471	37001	38000	-0.774528412366007
chrMT	B5	3	45.604	38001	39000	-0.144664055662059
chrMT	B5	3	42.234	39001	40000	-0.255419534830866
chrMT	B5	3	39.709	40001	41000	-0.344358397067648
chrMT	B5	3	32.218	41001	42000	-0.645957488198282
chrMT	B5	3	63.368	42001	43000	0.329930055684911
chrMT	B5	3	85.806	43001	44000	0.767254105264103
chrMT	B5	3	48.38	44001	45000	-0.0594136573805975
chrMT	B5	3	56.361	45001	46000	0.160872782575837
chrMT	B5	3	63.249	46001	47000	0.327218243520438
chrMT	B5	3	55.869	47001	48000	0.14822357100621
chrMT	B5	3	325.697	48001	49000	2.69163409929807
chrMT	B5	3	78.986	49001	50000	0.647772536458948
chrMT	B5	3	157.237	50001	51000	1.64104441145678
chrMT	B5	3	137.683	51001	52000	1.44945410616755
chrMT	B5	3	57.56	52001	53000	0.191242165379776
chrMT	B5	3	81.619	53001	54000	0.695080608035304
chrMT	B5	3	156.072	54001	55000	1.63031540291353
chrMT	B5	3	122.521	55001	56000	1.28113271537028
chrMT	B5	3	101.018	56001	57000	1.00271605222526
chrMT	B5	3	197.923	57001	58000	1.97304294130138
chrMT	B5	3	235.906	58001	59000	2.22631578053555
chrMT	B5	3	223.902	59001	60000	2.15097108328071
chrMT	B5	3	1116.123	60001	61000	4.46852778819306
chrMT	B5	3	849.466	61001	62000	4.0746598726755
chrMT	B5	3	312.838	62001	63000	2.6335194336533
chrMT	B5	3	336.732	63001	64000	2.73970449671304
chrMT	B5	3	298.525	64001	65000	2.56595542334985
chrMT	B5	3	281.182	65001	66000	2.47960791074336
chrMT	B5	3	282.105	66001	67000	2.48433590451751
chrMT	B5	3	65.763	67001	68000	0.383451687199523
chrMT	B5	3	40.099	68001	69000	-0.330258167899285
chrMT	B5	3	31.279	69001	70000	-0.688630036754652
chrMT	B5	3	59.2	70001	71000	0.23177274915579
chrMT	B5	3	21.702	71001	72000	-1.21599642287095
chrMT	B5	3	26.388	72001	73000	-0.93394241667176
chrMT	B5	3	20.209	73001	74000	-1.3188264919543
chrMT	B5	3	24.804	74001	75000	-1.02325163210128
chrMT	B5	3	27.686	75001	76000	-0.864667794698793
chrMT	B5	3	5.137	76001	77000	-3.29482644790093
chrMT	B5	4	0.965	1	1000	-5.60847221092498
chrMT	B5	4	0.542	1001	2000	-6.44070830172655
chrMT	B5	4	0.297	2001	3000	-7.30853822227966
chrMT	B5	4	7.423	3001	4000	-2.66507068957649
chrMT	B5	4	22.812	4001	5000	-1.04535202571072
chrMT	B5	4	40.484	5001	6000	-0.217793121743199
chrMT	B5	4	59.916	6001	7000	0.347796348970825
chrMT	B5	4	163.771	7001	8000	1.79846304352307
chrMT	B5	4	145.221	8001	9000	1.62503322384432
chrMT	B5	4	101.066	9001	10000	1.1020808676548
chrMT	B5	4	94.116	10001	11000	0.999295042721918
chrMT	B5	4	146.844	11001	12000	1.64106745015441
chrMT	B5	4	123.835	12001	13000	1.39520225842915
chrMT	B5	4	118.978	13001	14000	1.33747796350183
chrMT	B5	4	149.624	14001	15000	1.66812473642083
chrMT	B5	4	127.852	15001	16000	1.44125786031697
chrMT	B5	4	63.577	16001	17000	0.433359978279368
chrMT	B5	4	212.785	17001	18000	2.17617958488181
chrMT	B5	4	108.977	18001	19000	1.2108068123468
chrMT	B5	4	263.359	19001	20000	2.48381389418414
chrMT	B5	4	166.075	20001	21000	1.81861804577301
chrMT	B5	4	714.953	21001	22000	3.92463153563115
chrMT	B5	4	398.375	22001	23000	3.08091024535952
chrMT	B5	4	239.113	23001	24000	2.34447569940547
chrMT	B5	4	1177.828	24001	25000	4.64484010185988
chrMT	B5	4	343.272	25001	26000	2.86613531574568
chrMT	B5	4	238.357	26001	27000	2.33990712604023
chrMT	B5	4	90.842	27001	28000	0.948214505595276
chrMT	B5	4	1.256	28001	29000	-5.2282365941888
chrMT	B5	4	1.009	29001	30000	-5.54414688397407
chrMT	B5	4	2.534	30001	31000	-4.21565653393961
chrMT	B5	4	1.298	31001	32000	-5.18078267508128
chrMT	B5	4	0.328	32001	33000	-7.16530533846234
chrMT	B5	4	2.91	33001	34000	-4.01605390528478
chrMT	B5	4	8.904	34001	35000	-2.40261946573846
chrMT	B5	4	47.363	35001	36000	0.00861550147406561
chrMT	B5	4	53.657	36001	37000	0.188621431244249
chrMT	B5	4	32.431	37001	38000	-0.537771453989548
chrMT	B5	4	72.068	38001	39000	0.614213845321026
chrMT	B5	4	69.503	39001	40000	0.561930287567235
chrMT	B5	4	59.242	40001	41000	0.331475383060947
chrMT	B5	4	49.2	41001	42000	0.063513352033541
chrMT	B5	4	118.529	42001	43000	1.33202321189413
chrMT	B5	4	126.338	43001	44000	1.42407177021243
chrMT	B5	4	85.978	44001	45000	0.868822587548078
chrMT	B5	4	86.173	45001	46000	0.872090946759392
chrMT	B5	4	83.535	46001	47000	0.827235829825107
chrMT	B5	4	85.065	47001	48000	0.853420693492441
chrMT	B5	4	430.429	48001	49000	3.19255841358814
chrMT	B5	4	104.171	49001	50000	1.14573683527536
chrMT	B5	4	167.111	50001	51000	1.82758983257795
chrMT	B5	4	142.514	51001	52000	1.59788678213179
chrMT	B5	4	64.481	52001	53000	0.453729154464154
chrMT	B5	4	85.277	53001	54000	0.857011722206222
chrMT	B5	4	149.038	54001	55000	1.66246335078184
chrMT	B5	4	108.017	55001	56000	1.19804151676018
chrMT	B5	4	56.377	56001	57000	0.259961746014888
chrMT	B5	4	196.661	57001	58000	2.06249401533168
chrMT	B5	4	487.82	58001	59000	3.3731320393661
chrMT	B5	4	452.384	59001	60000	3.26433103608453
chrMT	B5	4	2223.855	60001	61000	5.56177395063583
chrMT	B5	4	1628.008	61001	62000	5.11181901524101
chrMT	B5	4	709.685	62001	63000	3.91396194501799
chrMT	B5	4	744.855	63001	64000	3.98374273660761
chrMT	B5	4	804.786	64001	65000	4.09538833969783
chrMT	B5	4	808.247	65001	66000	4.10157937881365
chrMT	B5	4	847.7	66001	67000	4.17033691844623
chrMT	B5	4	160.468	67001	68000	1.76906875989299
chrMT	B5	4	1.371	68001	69000	-5.1018444873012
chrMT	B5	4	0.272	69001	70000	-7.43539450183008
chrMT	B5	4	0.439	70001	71000	-6.74478021354506
chrMT	B5	4	0.732	71001	72000	-6.00715750479638
chrMT	B5	4	0.487	72001	73000	-6.59507938099808
chrMT	B5	4	0.072	73001	74000	-9.35293234163811
chrMT	B5	4	0.267	74001	75000	-7.46216141139287
chrMT	B5	4	0.426	75001	76000	-6.78814772285459
chrMT	B5	4	0.01	76001	77000	-12.2009292481931
chrMT	B5	5	0.191	1	1000	-7.92443944909704
chrMT	B5	5	0.01	1001	2000	-12.1799401822454
chrMT	B5	5	0.01	2001	3000	-12.1799401822454
chrMT	B5	5	6.023	3001	4000	-2.9456017335498
chrMT	B5	5	21.051	4001	5000	-1.14026712933805
chrMT	B5	5	23.555	5001	6000	-0.978122565577505
chrMT	B5	5	46.37	6001	7000	-0.000964170870900914
chrMT	B5	5	113.139	7001	8000	1.28586852192746
chrMT	B5	5	90.508	8001	9000	0.963889420029443
chrMT	B5	5	59.143	9001	10000	0.350051527737441
chrMT	B5	5	45.468	10001	11000	-0.0293043519029241
chrMT	B5	5	67.476	11001	12000	0.540218555129172
chrMT	B5	5	69.914	12001	13000	0.591425480881177
chrMT	B5	5	62.741	13001	14000	0.435252626235467
chrMT	B5	5	68.91	14001	15000	0.570557459853654
chrMT	B5	5	66.655	15001	16000	0.522557202856866
chrMT	B5	5	33.797	16001	17000	-0.457260706614602
chrMT	B5	5	111.377	17001	18000	1.26322353580027
chrMT	B5	5	46.219	18001	19000	-0.00566985176844747
chrMT	B5	5	111.129	19001	20000	1.26000754595461
chrMT	B5	5	57.434	20001	21000	0.307749144363578
chrMT	B5	5	317.16	21001	22000	2.7729830281173
chrMT	B5	5	190.672	22001	23000	2.03886519812817
chrMT	B5	5	113.925	23001	24000	1.29585656786518
chrMT	B5	5	527.741	24001	25000	3.50760226762476
chrMT	B5	5	146.868	25001	26000	1.66229228911138
chrMT	B5	5	103.751	26001	27000	1.16089743919094
chrMT	B5	5	39.09	27001	28000	-0.247356312956136
chrMT	B5	5	0.971	28001	29000	-5.5785407917136
chrMT	B5	5	1.559	29001	30000	-4.895463064435
chrMT	B5	5	2.79	30001	31000	-4.05581887041624
chrMT	B5	5	2.606	31001	32000	-4.15424690856465
chrMT	B5	5	0.601	32001	33000	-6.2706470964216
chrMT	B5	5	2.532	33001	34000	-4.19580658770445
chrMT	B5	5	8.259	34001	35000	-2.49011688181607
chrMT	B5	5	44.433	35001	36000	-0.0625243459493796
chrMT	B5	5	46.921	36001	37000	0.0160778634315713
chrMT	B5	5	29.788	37001	38000	-0.639424634920495
chrMT	B5	5	63.848	38001	39000	0.460485531502485
chrMT	B5	5	70.895	39001	40000	0.611527984753522
chrMT	B5	5	58.425	40001	41000	0.332429931424761
chrMT	B5	5	49.673	41001	42000	0.0983059833658144
chrMT	B5	5	112.86	42001	43000	1.28230645199892
chrMT	B5	5	137.963	43001	44000	1.57205360290335
chrMT	B5	5	89.027	44001	45000	0.94008704365
chrMT	B5	5	80.86	45001	46000	0.801270306026268
chrMT	B5	5	89.118	46001	47000	0.941560958271685
chrMT	B5	5	80.543	47001	48000	0.795603312029818
chrMT	B5	5	438.416	48001	49000	3.24007264774534
chrMT	B5	5	108.48	49001	50000	1.22520128089092
chrMT	B5	5	208.633	50001	51000	2.16873956786994
chrMT	B5	5	180.573	51001	52000	1.96035438869341
chrMT	B5	5	81.452	52001	53000	0.811794226025122
chrMT	B5	5	147.112	53001	54000	1.66468713005845
chrMT	B5	5	156.645	54001	55000	1.75527091792057
chrMT	B5	5	111.35	55001	56000	1.26287375542973
chrMT	B5	5	62.125	56001	57000	0.421018049091585
chrMT	B5	5	129.755	57001	58000	1.48356233000063
chrMT	B5	5	232.653	58001	59000	2.32595198769692
chrMT	B5	5	204.117	59001	60000	2.13716854035248
chrMT	B5	5	1034.72	60001	61000	4.47894071280245
chrMT	B5	5	806.114	61001	62000	4.11875607526905
chrMT	B5	5	325.601	62001	63000	2.81087732778295
chrMT	B5	5	322.106	63001	64000	2.79530773194473
chrMT	B5	5	291.982	64001	65000	2.65365163041216
chrMT	B5	5	351.32	65001	66000	2.92055790617146
chrMT	B5	5	310.644	66001	67000	2.74303438661067
chrMT	B5	5	52.884	67001	68000	0.188675404865803
chrMT	B5	5	0.806	68001	69000	-5.84723224860482
chrMT	B5	5	0.01	69001	70000	-12.1799401822454
chrMT	B5	5	0.97	70001	71000	-5.5800273400583
chrMT	B5	5	0.154	71001	72000	-8.23508173643789
chrMT	B5	5	0.098	72001	73000	-8.88715843301758
chrMT	B5	5	0.269	73001	74000	-7.43040591457616
chrMT	B5	5	0.166	74001	75000	-8.12682884578586
chrMT	B5	5	0.372	75001	76000	-6.96270946602476
chrMT	B5	5	0.01	76001	77000	-12.1799401822454
chrMT	B5	7	0.439	1	1000	-6.66506068176129
chrMT	B5	7	0.132	1001	2000	-8.39874369193819
chrMT	B5	7	0.416	2001	3000	-6.74269809315555
chrMT	B5	7	4.807	3001	4000	-3.21221672315875
chrMT	B5	7	6.123	4001	5000	-2.86311484354277
chrMT	B5	7	8.998	5001	6000	-2.3077491597176
chrMT	B5	7	12.957	6001	7000	-1.78169370936847
chrMT	B5	7	39.305	7001	8000	-0.180712581951079
chrMT	B5	7	28.056	8001	9000	-0.667116096043834
chrMT	B5	7	18.94	9001	10000	-1.2339891009409
chrMT	B5	7	14.375	10001	11000	-1.63186347569018
chrMT	B5	7	39.532	11001	12000	-0.172404486023219
chrMT	B5	7	30.61	12001	13000	-0.541422386882293
chrMT	B5	7	25.299	13001	14000	-0.816345071473991
chrMT	B5	7	30.663	14001	15000	-0.538926577757988
chrMT	B5	7	26.046	15001	16000	-0.774363603322609
chrMT	B5	7	12.28	16001	17000	-1.8591148710391
chrMT	B5	7	48.881	17001	18000	0.133848368145198
chrMT	B5	7	27.339	18001	19000	-0.704464958423775
chrMT	B5	7	67.966	19001	20000	0.609387786698321
chrMT	B5	7	36.972	20001	21000	-0.268992343536139
chrMT	B5	7	184.571	21001	22000	2.05067855608679
chrMT	B5	7	127.285	22001	23000	1.51456507687528
chrMT	B5	7	73.026	23001	24000	0.712984777351939
chrMT	B5	7	306.042	24001	25000	2.78023231943633
chrMT	B5	7	76.281	25001	26000	0.775898324928962
chrMT	B5	7	65.784	26001	27000	0.562311302250285
chrMT	B5	7	23.178	27001	28000	-0.942669348343559
chrMT	B5	7	0.444	28001	29000	-6.64872194494654
chrMT	B5	7	0.075	29001	30000	-9.21431912080077
chrMT	B5	7	0.296	30001	31000	-7.2336844456677
chrMT	B5	7	0.262	31001	32000	-7.4097148097592
chrMT	B5	7	0.01	32001	33000	-12.1212097164093
chrMT	B5	7	0.194	33001	34000	-7.84322496910952
chrMT	B5	7	7.673	34001	35000	-2.53756277173398
chrMT	B5	7	44.683	35001	36000	0.00430061933424538
chrMT	B5	7	61.071	36001	37000	0.455062036869847
chrMT	B5	7	38.856	37001	38000	-0.197288040272925
chrMT	B5	7	83.78	38001	39000	0.911180452457239
chrMT	B5	7	87.949	39001	40000	0.981241742274738
chrMT	B5	7	76.159	40001	41000	0.773589103824704
chrMT	B5	7	62.652	41001	42000	0.491935132772437
chrMT	B5	7	141.507	42001	43000	1.66737608450474
chrMT	B5	7	162.404	43001	44000	1.86608982958626
chrMT	B5	7	121.823	44001	45000	1.45128920076363
chrMT	B5	7	89.919	45001	46000	1.01320055951601
chrMT	B5	7	88.95	46001	47000	0.997569173745238
chrMT	B5	7	85.039	47001	48000	0.932699200122721
chrMT	B5	7	402.04	48001	49000	3.17384170914833
chrMT	B5	7	80.115	49001	50000	0.846646953204007
chrMT	B5	7	139.416	50001	51000	1.64589880394509
chrMT	B5	7	111.055	51001	52000	1.31777701156596
chrMT	B5	7	46.727	52001	53000	0.0688309834983766
chrMT	B5	7	1308.503	53001	54000	4.87634799007886
chrMT	B5	7	1522.659	54001	55000	5.09502364398141
chrMT	B5	7	77.78	55001	56000	0.803973803024924
chrMT	B5	7	38.941	56001	57000	-0.19413549898543
chrMT	B5	7	84.885	57001	58000	0.93008420639464
chrMT	B5	7	142.493	58001	59000	1.67739371144676
chrMT	B5	7	121.312	59001	60000	1.445224929874
chrMT	B5	7	664.639	60001	61000	3.89907361379242
chrMT	B5	7	479.261	61001	62000	3.42731420815478
chrMT	B5	7	195.805	62001	63000	2.13592026864921
chrMT	B5	7	198.075	63001	64000	2.15254946536633
chrMT	B5	7	141.41	64001	65000	1.66638680903208
chrMT	B5	7	133.711	65001	66000	1.58562081961599
chrMT	B5	7	99.961	66001	67000	1.16593990232873
chrMT	B5	7	13.509	67001	68000	-1.72150454823365
chrMT	B5	7	0.146	68001	69000	-8.25331325241663
chrMT	B5	7	0.36	69001	70000	-6.95128471496697
chrMT	B5	7	0.525	70001	71000	-6.40696419874316
chrMT	B5	7	0.01	71001	72000	-12.1212097164093
chrMT	B5	7	0.194	72001	73000	-7.84322496910952
chrMT	B5	7	0.529	73001	74000	-6.39601389918262
chrMT	B5	7	0.319	74001	75000	-7.12572519753178
chrMT	B5	7	0.426	75001	76000	-6.70842819107081
chrMT	B5	7	0.01	76001	77000	-12.1212097164093
chrMT	B5	9	0.146	1	1000	-8.06106597684332
chrMT	B5	9	0.332	1001	2000	-6.87585110437642
chrMT	B5	9	0.072	2001	3000	-9.08096553428103
chrMT	B5	9	0.597	3001	4000	-6.02930341445854
chrMT	B5	9	0.217	4001	5000	-7.48933930327886
chrMT	B5	9	0.238	5001	6000	-7.3560727724154
chrMT	B5	9	0.114	6001	7000	-8.4180005215586
chrMT	B5	9	0.562	7001	8000	-6.11646421550241
chrMT	B5	9	0.168	8001	9000	-7.85857311294458
chrMT	B5	9	0.436	9001	10000	-6.48270621094641
chrMT	B5	9	0.14	10001	11000	-8.12160751877837
chrMT	B5	9	0.726	11001	12000	-5.74706479772759
chrMT	B5	9	0.259	12001	13000	-7.23408224803679
chrMT	B5	9	0.327	13001	14000	-6.89774371022526
chrMT	B5	9	0.648	14001	15000	-5.91104053283872
chrMT	B5	9	0.249	15001	16000	-7.29088860365526
chrMT	B5	9	0.271	16001	17000	-7.16874149436947
chrMT	B5	9	1.48	17001	18000	-4.71950907520703
chrMT	B5	9	0.362	18001	19000	-6.75104464864014
chrMT	B5	9	0.85	19001	20000	-5.51957150469828
chrMT	B5	9	0.302	20001	21000	-7.01248579639826
chrMT	B5	9	43.621	21001	22000	0.161844687589826
chrMT	B5	9	27.297	22001	23000	-0.514435751656857
chrMT	B5	9	10.73	23001	24000	-1.86152808007946
chrMT	B5	9	64.808	24001	25000	0.732993756441314
chrMT	B5	9	7.748	25001	26000	-2.33128229712009
chrMT	B5	9	0.433	26001	27000	-6.49266732099662
chrMT	B5	9	0.11	27001	28000	-8.46953082219868
chrMT	B5	9	0.099	28001	29000	-8.62153391564373
chrMT	B5	9	0.399	29001	30000	-6.61064559950099
chrMT	B5	9	0.781	30001	31000	-5.64171179758136
chrMT	B5	9	0.39	31001	32000	-6.64356022197373
chrMT	B5	9	0.22	32001	33000	-7.46953082219868
chrMT	B5	9	2.882	33001	34000	-3.75803591554859
chrMT	B5	9	0.454	34001	35000	-6.42434204843243
chrMT	B5	9	3.231	35001	36000	-3.59312550045798
chrMT	B5	9	3.599	36001	37000	-3.43751014879861
chrMT	B5	9	1.447	37001	38000	-4.75204132919162
chrMT	B5	9	2.769	38001	39000	-3.81574119735641
chrMT	B5	9	3.912	39001	40000	-3.31719988077111
chrMT	B5	9	3.057	40001	41000	-3.67298969883637
chrMT	B5	9	1.788	41001	42000	-4.44675951454002
chrMT	B5	9	4.058	42001	43000	-3.26433738596668
chrMT	B5	9	5.983	43001	44000	-2.70423718806838
chrMT	B5	9	3.338	44001	45000	-3.54612229636074
chrMT	B5	9	3.885	45001	46000	-3.32719165242827
chrMT	B5	9	4.964	46001	47000	-2.97360313559298
chrMT	B5	9	4.354	47001	48000	-3.16276484353513
chrMT	B5	9	25.965	48001	49000	-0.586609930748183
chrMT	B5	9	4.681	49001	50000	-3.05828948601139
chrMT	B5	9	10.165	50001	51000	-1.93956794099125
chrMT	B5	9	5.219	51001	52000	-2.90133284910282
chrMT	B5	9	1.918	52001	53000	-4.34550353070521
chrMT	B5	9	491.406	53001	54000	3.65566541163007
chrMT	B5	9	573.023	54001	55000	3.87734298575848
chrMT	B5	9	14.764	55001	56000	-1.40109451347773
chrMT	B5	9	11.781	56001	57000	-1.72671615233579
chrMT	B5	9	25.721	57001	58000	-0.600231422256264
chrMT	B5	9	42.142	58001	59000	0.112080627881955
chrMT	B5	9	39.409	59001	60000	0.0153469855032037
chrMT	B5	9	222.246	60001	61000	2.51090739226978
chrMT	B5	9	143.996	61001	62000	1.88477867496221
chrMT	B5	9	61.186	62001	63000	0.650023430712618
chrMT	B5	9	52.321	63001	64000	0.424211958845091
chrMT	B5	9	27.052	64001	65000	-0.527442897300422
chrMT	B5	9	12.828	65001	66000	-1.60388189728169
chrMT	B5	9	2.638	66001	67000	-3.8856616864718
chrMT	B5	9	0.351	67001	68000	-6.79556331541878
chrMT	B5	9	0.799	68001	69000	-5.60883884279536
chrMT	B5	9	0.196	69001	70000	-7.63618069160813
chrMT	B5	9	0.687	70001	71000	-5.82672424690524
chrMT	B5	9	0.062	71001	72000	-9.29669422533646
chrMT	B5	9	0.122	72001	73000	-8.32015319816045
chrMT	B5	9	0.292	73001	74000	-7.06106597684332
[truncated: 1,466 more rows]
