# Supplementary material for: Genetically controlled mtDNA deletions prevent ROS damage by arresting oxidative phosphorylation
Source: eLife. 2022 Jul 8;11:e76095. doi: 10.7554/eLife.76095 (PMC9427111; doi:10.7554/eLife.76095)
Supplement: Figure 3—source data 3. — Data are shown in Figure 3D and in Figure 3—figure supplement 2C. [file elife-76095-fig3-data3.xlsx]

## Sheet: Data S15 - mtDNA seq. Relax.
README: Copy number is defined as 2^l(og2 coverage ratio relative to the euploid genome)
Chromosome	Population	Window start	Window end	Ancestral batch cycle t	Batch Cycle tR	N	Copy number	SD Copy number	S.E.M Copy number
chrMT	FOUNDER	1	1001	0	0	2	6.65176299052692	0.0198082585177691	0.0140065539214107
chrMT	A7	1	1001	1	1	2	6.75010178373094	0.230536377510998	0.163013835848208
chrMT	A7	1	1001	1	10	2	13.1496116471685	0.337594485770491	0.2387153501795
chrMT	A7	1	1001	1	2	2	7.84965487933578	0.229479571421522	0.162266561095941
chrMT	A7	1	1001	1	3	2	11.2906663311656	0.160642725693508	0.11359156068617
chrMT	A7	1	1001	1	4	2	14.433204085138	0.115364387662362	0.08157494082349
chrMT	A7	1	1001	1	5	2	10.8475831218126	0.0375046322742274	0.026519779807014
chrMT	A7	1	1001	1	9	2	12.5072805070002	0.0492771682746071	0.0348442198446453
chrMT	A8	1	1001	1	1	2	4.6449409573808	0.259080976979029	0.183197915698307
chrMT	A8	1	1001	1	10	2	14.5613514784128	0.150589651628105	0.106482963842753
chrMT	A8	1	1001	1	2	2	8.09266576548203	0.249947254503823	0.176739398598613
chrMT	A8	1	1001	1	3	3	13.9908850020492	0.361027343759336	0.208439234104268
chrMT	A8	1	1001	1	4	2	11.0409797234917	0.124876277122441	0.0883008623626083
chrMT	A8	1	1001	1	5	2	11.8575958295407	0.403370766967444	0.285226204655098
chrMT	A8	1	1001	1	9	2	13.8407601020226	0.485410485088447	0.343237045665092
chrMT	B12	1	1001	1	1	2	12.6475284762794	0.0314919701618163	0.0222681856543447
chrMT	B12	1	1001	1	10	2	13.6469892739164	0.430775780859423	0.304604475816628
chrMT	B12	1	1001	1	2	1	10.7703949757546	NA	NA
chrMT	B12	1	1001	1	3	3	10.4056222076798	0.657350691270028	0.379521598556737
chrMT	B12	1	1001	1	4	2	9.85374313292353	0.399082263621504	0.282193774858043
chrMT	B12	1	1001	1	5	2	12.9574479957611	0.219837190535461	0.155448368184624
chrMT	B12	1	1001	1	9	2	13.6792609123235	0.224447140245334	0.158708094885403
chrMT	FOUNDER	1001	2001	0	0	2	7.50558499883384	0.0583177391400153	0.0412368688093729
chrMT	A7	1001	2001	1	1	2	7.42808122366886	0.302710504373579	0.214048650378958
chrMT	A7	1001	2001	1	10	2	14.5438855751403	0.0863137965202708	0.0610330708294393
chrMT	A7	1001	2001	1	2	2	8.66897213907449	0.0312188865145363	0.0220750863555219
chrMT	A7	1001	2001	1	3	2	12.3097374386383	0.25051242221392	0.17713903251893
chrMT	A7	1001	2001	1	4	2	15.5145919782766	0.135199689021936	0.0956006169217236
chrMT	A7	1001	2001	1	5	2	11.9984494863277	0.0283852705715068	0.0200714173069274
chrMT	A7	1001	2001	1	9	2	13.5981336428158	0.216197799428572	0.152874930053552
chrMT	A8	1001	2001	1	1	2	5.00252826561498	0.0530252310699716	0.0374945004635605
chrMT	A8	1001	2001	1	10	2	15.9046144369602	0.0628751368847249	0.0444594356592214
chrMT	A8	1001	2001	1	2	2	8.9405098483781	0.138672587510502	0.098056326993361
chrMT	A8	1001	2001	1	3	3	15.2665973142474	0.142706436517656	0.0823915995385608
chrMT	A8	1001	2001	1	4	2	11.9838081762863	0.0654438341829524	0.0462757789376136
chrMT	A8	1001	2001	1	5	2	12.7666546936923	0.270158054413143	0.191030592267698
chrMT	A8	1001	2001	1	9	2	15.6899767706072	0.225133818669228	0.159193649855434
chrMT	B12	1001	2001	1	1	2	15.1669602631199	0.0119107439672337	0.00842216782820771
chrMT	B12	1001	2001	1	10	2	14.9889736618654	0.178459346228717	0.126189813884444
chrMT	B12	1001	2001	1	2	1	11.8974857411403	NA	NA
chrMT	B12	1001	2001	1	3	3	11.2709944899817	0.628803218566416	0.363039707506623
chrMT	B12	1001	2001	1	4	2	10.7671257942118	0.596949625235507	0.422107128030795
chrMT	B12	1001	2001	1	5	2	13.9400596392333	0.292440225602172	0.20678646661502
chrMT	B12	1001	2001	1	9	2	14.7889434872481	0.115842964721564	0.0819133459073722
chrMT	FOUNDER	2001	3001	0	0	2	6.28288011964213	0.170578914968755	0.12061750750185
chrMT	A7	2001	3001	1	1	2	6.52453857683295	0.31437618815456	0.222297534487667
chrMT	A7	2001	3001	1	10	2	12.1176872816778	0.391298741350616	0.276689993478781
chrMT	A7	2001	3001	1	2	2	7.54016838609139	0.15640409012563	0.110594392733145
chrMT	A7	2001	3001	1	3	2	10.4654464048001	0.140204303915376	0.0991394140501018
chrMT	A7	2001	3001	1	4	2	13.0985601014703	0.144017822217655	0.101835978701822
chrMT	A7	2001	3001	1	5	2	10.1842204886706	0.00606094058667849	0.00428573218920913
chrMT	A7	2001	3001	1	9	2	11.8748291887381	0.354656699727422	0.250780157370501
chrMT	A8	2001	3001	1	1	2	4.95329254344661	0.00152528915999255	0.00107854230830107
chrMT	A8	2001	3001	1	10	2	13.6606896101276	0.149765472849298	0.105900181439348
chrMT	A8	2001	3001	1	2	2	7.863413863284	0.147034818285398	0.103969317080137
chrMT	A8	2001	3001	1	3	3	12.7396099989498	0.407088684269118	0.235032761446826
chrMT	A8	2001	3001	1	4	2	9.97192175934421	0.184388239694374	0.130382174658942
chrMT	A8	2001	3001	1	5	2	10.6646664400932	0.378121064450275	0.267371968782265
chrMT	A8	2001	3001	1	9	2	13.525299804416	0.137087355251972	0.0969353985135983
chrMT	B12	2001	3001	1	1	2	20.1103100163785	0.170869445594168	0.120822943677222
chrMT	B12	2001	3001	1	10	2	13.4028262954019	0.575621435364423	0.407025820342517
chrMT	B12	2001	3001	1	2	1	13.6229359365988	NA	NA
chrMT	B12	2001	3001	1	3	3	9.87822986169954	0.598270189411926	0.345411454905104
chrMT	B12	2001	3001	1	4	2	10.3944933741389	0.613655535807602	0.433919990682219
chrMT	B12	2001	3001	1	5	2	12.9075044809644	0.222901966154549	0.157615491807696
chrMT	B12	2001	3001	1	9	2	12.760212946039	0.0575512327043449	0.0406948669108873
chrMT	FOUNDER	3001	4001	0	0	2	6.11564998051305	0.0664058836671127	0.0469560506517004
chrMT	A7	3001	4001	1	1	2	4.51058479705138	0.376528753393689	0.266246034836395
chrMT	A7	3001	4001	1	10	2	11.2514144510444	0.0581047031438363	0.0410862296118379
chrMT	A7	3001	4001	1	2	2	5.70024134679001	0.110755203233711	0.078315755258251
chrMT	A7	3001	4001	1	3	2	9.8483545186603	0.0206904516241082	0.0146303586492191
chrMT	A7	3001	4001	1	4	2	12.6136235323464	0.571094059447917	0.403824482130975
chrMT	A7	3001	4001	1	5	2	8.53814669594564	0.0242942984524097	0.0171786631798687
chrMT	A7	3001	4001	1	9	2	11.1188052923165	0.247308530668056	0.174873539080663
chrMT	A8	3001	4001	1	1	2	8.18977417509639	0.207734670781373	0.146890594397064
chrMT	A8	3001	4001	1	10	2	12.9407999322919	0.0452423977453033	0.0319912062428429
chrMT	A8	3001	4001	1	2	2	8.48768802717525	0.00962524820849142	0.00680607827882795
chrMT	A8	3001	4001	1	3	3	12.5319010537556	0.279318842781057	0.161264809069378
chrMT	A8	3001	4001	1	4	2	9.85294169432115	0.271639613600259	0.192078212815637
chrMT	A8	3001	4001	1	5	2	10.2309853706737	0.0319830984795075	0.0226154658182169
chrMT	A8	3001	4001	1	9	2	12.5047016668023	0.0202225012430038	0.0142994677614814
chrMT	B12	3001	4001	1	1	2	25.2241621694312	0.377931826592789	0.267238157409979
chrMT	B12	3001	4001	1	10	2	12.7938613796682	0.395924844149758	0.279961142138521
chrMT	B12	3001	4001	1	2	1	15.8797235810565	NA	NA
chrMT	B12	3001	4001	1	3	3	10.0668616671666	0.347016211166383	0.200349902930075
chrMT	B12	3001	4001	1	4	2	10.2797818546557	0.276687288762699	0.195647458152225
chrMT	B12	3001	4001	1	5	2	12.9437929879511	0.851895280956192	0.602380930024943
chrMT	B12	3001	4001	1	9	2	12.1921259124617	0.27486877002185	0.194361571218856
chrMT	FOUNDER	4001	5001	0	0	2	4.7015256677006	0.301726112200947	0.213352579998343
chrMT	A7	4001	5001	1	1	2	3.07142790650712	0.131804553368033	0.0931998934778002
chrMT	A7	4001	5001	1	10	2	8.69906229031911	0.186268103883314	0.131711439374651
chrMT	A7	4001	5001	1	2	2	4.22415877511718	0.18319671369664	0.129539638545984
chrMT	A7	4001	5001	1	3	2	7.65258893882208	0.132219562501971	0.0934933492506622
chrMT	A7	4001	5001	1	4	2	9.67123390199125	0.420616999552297	0.297421132665768
chrMT	A7	4001	5001	1	5	2	6.55987824712347	0.0169929509145313	0.0120158308240352
chrMT	A7	4001	5001	1	9	2	8.62940532159531	0.274063068770832	0.193791854400651
chrMT	A8	4001	5001	1	1	2	7.87955669163507	0.0958951838360179	0.0678081347735788
chrMT	A8	4001	5001	1	10	2	10.0979710309824	0.0374033731182375	0.0264481787711563
chrMT	A8	4001	5001	1	2	2	7.45790072479087	0.00669377832618856	0.00473321604620747
chrMT	A8	4001	5001	1	3	3	10.2252936119272	0.189993471602511	0.109692781973981
chrMT	A8	4001	5001	1	4	2	7.73326862637222	0.200567485815827	0.141822629305908
chrMT	A8	4001	5001	1	5	2	8.45131652260177	0.119291767103135	0.084352017458353
chrMT	A8	4001	5001	1	9	2	9.82815540621993	0.275376511558635	0.194720598702607
chrMT	B12	4001	5001	1	1	2	14.2418613980462	0.193320671309681	0.136698357626611
chrMT	B12	4001	5001	1	10	2	9.21888782953513	0.557730141889379	0.394374765402115
chrMT	B12	4001	5001	1	2	1	9.93743190993955	NA	NA
chrMT	B12	4001	5001	1	3	3	7.50844088810795	0.453175572326393	0.261641038672806
chrMT	B12	4001	5001	1	4	2	7.04580059682535	0.30719161687479	0.217217275415824
chrMT	B12	4001	5001	1	5	2	8.56138513104207	0.181827924148611	0.128571758174556
chrMT	B12	4001	5001	1	9	2	8.86001529952784	0.0679018758034424	0.0480138768359009
chrMT	FOUNDER	5001	6001	0	0	2	6.49266003189704	0.172414258581866	0.121915291416488
chrMT	A7	5001	6001	1	1	2	4.21170141404781	0.100277111831982	0.0709066257741959
chrMT	A7	5001	6001	1	10	2	12.0659146862989	0.1957514561043	0.138417182038491
chrMT	A7	5001	6001	1	2	2	5.72107179175574	0.0491838094763331	0.0347782052053023
chrMT	A7	5001	6001	1	3	2	10.6574080307595	0.163247900439812	0.115433697415457
chrMT	A7	5001	6001	1	4	2	13.6585179695694	0.330048396555305	0.233379459324003
chrMT	A7	5001	6001	1	5	2	9.45208805164632	0.194858809542675	0.137785985601563
chrMT	A7	5001	6001	1	9	2	11.9381143780421	0.263553297106945	0.186360323588394
chrMT	A8	5001	6001	1	1	2	12.749305034851	0.530582781974574	0.375178683115045
chrMT	A8	5001	6001	1	10	2	14.3841228744968	0.332910682085538	0.235403400832123
chrMT	A8	5001	6001	1	2	2	11.0813240870144	0.0770988324319476	0.0545171072341954
chrMT	A8	5001	6001	1	3	3	14.5397631571461	0.570377388771283	0.329307538946776
chrMT	A8	5001	6001	1	4	2	11.016158897756	0.156624827883787	0.110750477898802
chrMT	A8	5001	6001	1	5	2	11.8053903760317	0.0108023970104855	0.00763844817918358
chrMT	A8	5001	6001	1	9	2	14.1485060157785	0.228637955334813	0.161671448653873
chrMT	B12	5001	6001	1	1	2	17.275084222267	0.465800932162228	0.329370997814927
chrMT	B12	5001	6001	1	10	2	13.1474407984777	0.0438324783227355	0.0309942426582186
chrMT	B12	5001	6001	1	2	1	12.1312349133788	NA	NA
chrMT	B12	5001	6001	1	3	3	10.0432130858879	0.315690304081461	0.182263882041986
chrMT	B12	5001	6001	1	4	2	9.31634032301267	0.358226750658968	0.253304564593379
chrMT	B12	5001	6001	1	5	2	11.7280409702214	0.436009665146671	0.308305390888087
chrMT	B12	5001	6001	1	9	2	12.7086773521067	0.587658348700107	0.415537203386735
chrMT	FOUNDER	6001	7001	0	0	2	6.69829419946513	0.0409848228457304	0.0289806461599453
chrMT	A7	6001	7001	1	1	2	3.8597941006453	0.378036278348494	0.267312015954745
chrMT	A7	6001	7001	1	10	2	12.75018702459	0.269330712412027	0.190445573128348
chrMT	A7	6001	7001	1	2	2	5.79474004086057	0.122050774115585	0.0863029300261977
chrMT	A7	6001	7001	1	3	2	11.2236356183224	0.122113511519664	0.0863472920700561
chrMT	A7	6001	7001	1	4	2	14.0282277072848	0.493373761503823	0.348867932418868
chrMT	A7	6001	7001	1	5	2	9.47433341480479	0.200527457676046	0.14179432513683
chrMT	A7	6001	7001	1	9	2	12.0574567196541	0.338170335409078	0.239122537363889
chrMT	A8	6001	7001	1	1	2	6.27305979975391	0.310343063627494	0.219445684785209
chrMT	A8	6001	7001	1	10	2	14.9225686436217	0.00907383451921431	0.00641616991990102
chrMT	A8	6001	7001	1	2	2	9.15720619515078	0.0690451408612685	0.0488222873109834
chrMT	A8	6001	7001	1	3	3	14.2407941844522	0.54157493095904	0.312678432175555
chrMT	A8	6001	7001	1	4	2	10.9339255953944	0.114951855503458	0.0812832365364713
chrMT	A8	6001	7001	1	5	2	11.53283607493	0.0314281856086414	0.0222230831642598
chrMT	A8	6001	7001	1	9	2	14.5587746953746	0.292842849561654	0.207071164747037
chrMT	B12	6001	7001	1	1	2	9.91855060316408	0.0622206091613078	0.0439966146675186
chrMT	B12	6001	7001	1	10	2	12.8207679665223	0.746648709387687	0.527960365572217
chrMT	B12	6001	7001	1	2	1	8.66357635699485	NA	NA
chrMT	B12	6001	7001	1	3	3	10.120863217611	0.514737715122725	0.297183958388158
chrMT	B12	6001	7001	1	4	2	8.41296324832418	0.450335981425932	0.318435626278576
chrMT	B12	6001	7001	1	5	2	11.0542310404084	0.462309693661767	0.326902319396511
chrMT	B12	6001	7001	1	9	2	12.8321440618573	0.0304740314565175	0.0215483942929957
chrMT	FOUNDER	7001	8001	0	0	2	6.48966483419848	0.0444393466976757	0.0314233634014265
chrMT	A7	7001	8001	1	1	2	3.67103562573071	0.274292649521047	0.193954192505957
chrMT	A7	7001	8001	1	10	2	12.3086635970372	0.154159528069445	0.109007247682422
chrMT	A7	7001	8001	1	2	2	5.34815223506575	0.0945458215973153	0.0668539915843152
chrMT	A7	7001	8001	1	3	2	10.6384047256009	0.243024401462711	0.171844202268085
chrMT	A7	7001	8001	1	4	2	13.3647835423858	0.0960972902665743	0.0679510456011467
chrMT	A7	7001	8001	1	5	2	9.34056258367031	0.096027798070464	0.0679019071980376
chrMT	A7	7001	8001	1	9	2	11.8824073697285	0.486394984267153	0.343933191710428
chrMT	A8	7001	8001	1	1	2	5.97410498724457	0.158954113217859	0.112397531353842
chrMT	A8	7001	8001	1	10	2	14.2034567961936	0.435710657039159	0.308093960227636
chrMT	A8	7001	8001	1	2	2	8.70767036052952	0.0691075401017034	0.0488664102370357
chrMT	A8	7001	8001	1	3	3	13.7014715401502	0.169593016563586	0.0979145737656669
chrMT	A8	7001	8001	1	4	2	10.4615284852396	0.175503562840179	0.12409975940669
chrMT	A8	7001	8001	1	5	2	11.3530273872613	0.413915326672303	0.29268233432703
chrMT	A8	7001	8001	1	9	2	13.6900608901602	0.0493442434107983	0.0348916491282951
chrMT	B12	7001	8001	1	1	2	8.94411202633642	0.192613318714069	0.136198183809564
chrMT	B12	7001	8001	1	10	2	12.8165901515897	0.201471530675207	0.142461885556473
chrMT	B12	7001	8001	1	2	1	8.11751009335014	NA	NA
chrMT	B12	7001	8001	1	3	3	9.65232235098879	0.419981144769711	0.24247622698736
chrMT	B12	7001	8001	1	4	2	7.92430234585338	0.42267267498241	0.29887471470232
chrMT	B12	7001	8001	1	5	2	10.9140872895576	0.184984879987037	0.130804063055813
chrMT	B12	7001	8001	1	9	2	12.4764327130098	0.0734372440646057	0.0519279732697342
chrMT	FOUNDER	8001	9001	0	0	2	7.26792088222969	0.0805284587349425	0.0569422192499789
chrMT	A7	8001	9001	1	1	2	3.97470475392168	0.151179703695829	0.106900193661094
chrMT	A7	8001	9001	1	10	2	12.8599735015484	0.386225059803937	0.273102358851544
chrMT	A7	8001	9001	1	2	2	5.81622448884046	0.0185268178213592	0.0131004385152909
chrMT	A7	8001	9001	1	3	2	11.1750141437855	0.289223904118583	0.204512183883498
chrMT	A7	8001	9001	1	4	2	14.2161585926151	0.0935033030979684	0.0661168196839146
chrMT	A7	8001	9001	1	5	2	9.65850983418749	0.379664312492154	0.268463209937731
chrMT	A7	8001	9001	1	9	2	12.4468195297127	0.480133852716688	0.339505903133193
chrMT	A8	8001	9001	1	1	2	6.28403021560552	0.174020780880769	0.12305127422817
chrMT	A8	8001	9001	1	10	2	15.0263619141289	0.00671731330946379	0.0047498577924765
chrMT	A8	8001	9001	1	2	2	9.19003483295326	0.222187902407348	0.15711057248985
chrMT	A8	8001	9001	1	3	3	15.004125076143	0.395527370001776	0.22835783354239
chrMT	A8	8001	9001	1	4	2	11.0344682812449	0.0726092241281424	0.0513424747577034
chrMT	A8	8001	9001	1	5	2	12.3788081767462	0.0718033360571259	0.0507726258378103
chrMT	A8	8001	9001	1	9	2	14.6546299269782	0.055287301489888	0.0390940257970049
chrMT	B12	8001	9001	1	1	2	9.89308351092043	0.0437076824691555	0.0309059986638882
chrMT	B12	8001	9001	1	10	2	13.5910128602001	0.755251898679096	0.534043739060004
chrMT	B12	8001	9001	1	2	1	9.21127678209044	NA	NA
chrMT	B12	8001	9001	1	3	3	10.2606489188292	0.432225700970765	0.249545624806146
chrMT	B12	8001	9001	1	4	2	8.57944686262549	0.478385169431057	0.338269397323776
chrMT	B12	8001	9001	1	5	2	11.1528207124426	0.0620046016873175	0.0438438743178731
chrMT	B12	8001	9001	1	9	2	13.0767400508105	0.291715521850131	0.2062740236776
chrMT	FOUNDER	9001	10001	0	0	2	7.06478591267731	0.414749884525107	0.293272455844041
chrMT	A7	9001	10001	1	1	2	3.82725557098086	0.215584467281587	0.1524412387333
chrMT	A7	9001	10001	1	10	2	12.9606486950815	0.565811340103298	0.40008903545929
chrMT	A7	9001	10001	1	2	2	5.75138173390967	0.0710430077320214	0.0502349925232006
chrMT	A7	9001	10001	1	3	2	11.0643414677116	0.258935561109419	0.183095091150814
chrMT	A7	9001	10001	1	4	2	14.088332272439	0.216830276659501	0.153322158992489
chrMT	A7	9001	10001	1	5	2	9.86508904980599	0.236684218653663	0.167361016009845
chrMT	A7	9001	10001	1	9	2	12.7070097377051	0.541734621272484	0.3830642243053
chrMT	A8	9001	10001	1	1	2	6.43131361198144	0.201401088294145	0.14241207527114
chrMT	A8	9001	10001	1	10	2	14.5940037071367	0.253201774644481	0.179040691859581
chrMT	A8	9001	10001	1	2	2	9.14904203662946	0.0683391923400902	0.0483231063244896
chrMT	A8	9001	10001	1	3	3	14.3968227960882	0.527001679019007	0.304264561245009
chrMT	A8	9001	10001	1	4	2	11.2029981420503	0.0989635282200335	0.069977781894532
chrMT	A8	9001	10001	1	5	2	12.0371941495158	0.154817187454233	0.109472283093117
chrMT	A8	9001	10001	1	9	2	14.5668010405342	0.130343917731365	0.0921670681142697
chrMT	B12	9001	10001	1	1	2	9.63876251507821	0.191390275866397	0.135333361918294
chrMT	B12	9001	10001	1	10	2	13.2812598968828	0.672730362057251	0.475692200920763
chrMT	B12	9001	10001	1	2	1	8.58610855958815	NA	NA
chrMT	B12	9001	10001	1	3	3	10.3516924630269	0.489872902097438	0.282828251894659
chrMT	B12	9001	10001	1	4	2	8.44813611755582	0.49906616137431	0.352893066968514
chrMT	B12	9001	10001	1	5	2	11.2575347496446	0.262335845580783	0.185499455358479
chrMT	B12	9001	10001	1	9	2	12.5633501876981	0.165986442757443	0.117370139258821
chrMT	FOUNDER	10001	11001	0	0	2	6.83094166127102	0.195856513775964	0.138491469030541
chrMT	A7	10001	11001	1	1	2	3.80925072736532	0.21822178214615	0.154306101958156
chrMT	A7	10001	11001	1	10	2	12.7196638816437	0.352589407179132	0.249318360790909
chrMT	A7	10001	11001	1	2	2	5.81667359759779	0.218370690656439	0.154411396175558
chrMT	A7	10001	11001	1	3	2	11.0114440566542	0.284973881239552	0.201506963885537
chrMT	A7	10001	11001	1	4	2	14.0235644501632	0.0696378156374101	0.0492413716642313
chrMT	A7	10001	11001	1	5	2	9.80526608807419	0.42027270876365	0.297177682314416
chrMT	A7	10001	11001	1	9	2	12.1209266456374	0.387799130679514	0.274215395041733
chrMT	A8	10001	11001	1	1	2	5.9723310440975	0.104577466432954	0.0739474356740502
chrMT	A8	10001	11001	1	10	2	15.1545221694961	0.0368159129400354	0.0260327816954726
chrMT	A8	10001	11001	1	2	2	8.9810190719324	0.00584417005823898	0.00413245227858816
chrMT	A8	10001	11001	1	3	3	14.4362167868994	0.591300349168546	0.34138741576438
chrMT	A8	10001	11001	1	4	2	10.9645003106562	0.376107599528659	0.265948234082509
chrMT	A8	10001	11001	1	5	2	11.3348540030571	0.371135031378854	0.262432097423869
chrMT	A8	10001	11001	1	9	2	14.3426564731479	0.122346338094404	0.0865119253198951
chrMT	B12	10001	11001	1	1	2	8.80310275566412	0.0326808261733508	0.0231088338019552
chrMT	B12	10001	11001	1	10	2	12.7415558862612	0.689716415746053	0.487703154669714
chrMT	B12	10001	11001	1	2	1	7.72260910430863	NA	NA
chrMT	B12	10001	11001	1	3	3	10.0865596891784	0.578804167513677	0.334172741922099
chrMT	B12	10001	11001	1	4	2	8.21264320383903	0.546582708233581	0.386492339471273
chrMT	B12	10001	11001	1	5	2	11.3106243848338	0.117463614217158	0.0830593181556329
chrMT	B12	10001	11001	1	9	2	12.6660399565526	0.127928977403334	0.0904594474321581
chrMT	FOUNDER	11001	12001	0	0	2	5.8909322823988	0.295344040685658	0.208839773951864
chrMT	A7	11001	12001	1	1	2	3.416958708153	0.193615157613713	0.136906590889158
chrMT	A7	11001	12001	1	10	2	11.1484798385048	0.212246873809536	0.150081203756368
chrMT	A7	11001	12001	1	2	2	4.85010275655132	0.121992087539668	0.0862614323504025
chrMT	A7	11001	12001	1	3	2	9.70071344410525	0.109294497059136	0.0772828800168881
chrMT	A7	11001	12001	1	4	2	12.2114409296313	0.349921135329429	0.247431607671935
chrMT	A7	11001	12001	1	5	2	8.52738097758154	0.202547289250467	0.143222561739958
chrMT	A7	11001	12001	1	9	2	10.8161433662937	0.138464823547891	0.0979094156865123
chrMT	A8	11001	12001	1	1	2	4.6782645986523	0.213773311027843	0.151160557864489
chrMT	A8	11001	12001	1	10	2	13.3291376708962	0.173758513433775	0.122865823137916
chrMT	A8	11001	12001	1	2	2	7.6309313746393	0.0209153521486888	0.0147893873352425
chrMT	A8	11001	12001	1	3	3	12.7674045167618	0.429806622081092	0.248148968958002
chrMT	A8	11001	12001	1	4	2	9.53877050104196	0.110882664395696	0.0784058839102286
chrMT	A8	11001	12001	1	5	2	10.2851145202453	0.0028259882677746	0.00199827546769704
chrMT	A8	11001	12001	1	9	2	12.5707339880476	0.106999104073624	0.0756597920713444
chrMT	B12	11001	12001	1	1	2	7.59522026176299	0.0668059040588251	0.0472389077832931
chrMT	B12	11001	12001	1	10	2	11.730887123182	0.303318505520854	0.214478572113165
chrMT	B12	11001	12001	1	2	1	7.27951637365689	NA	NA
chrMT	B12	11001	12001	1	3	3	8.89632762860994	0.146888787745066	0.0848062811455517
chrMT	B12	11001	12001	1	4	2	7.32014088807268	0.204128411055741	0.14434058369035
chrMT	B12	11001	12001	1	5	2	9.95697065262901	0.207737083518215	0.146892300459646
chrMT	B12	11001	12001	1	9	2	11.2138356433897	0.257211343585443	0.181875885247369
chrMT	FOUNDER	12001	13001	0	0	2	7.36864718069616	0.101365771701427	0.0716764245502866
chrMT	A7	12001	13001	1	1	2	4.16233600089227	0.124290265388409	0.0878864894916194
chrMT	A7	12001	13001	1	10	2	13.7483513597042	0.323698652069273	0.228889511939128
chrMT	A7	12001	13001	1	2	2	5.9724867068073	0.289746923809856	0.204882014653891
chrMT	A7	12001	13001	1	3	2	11.8672283112714	0.282445912892942	0.199719420325025
chrMT	A7	12001	13001	1	4	2	15.3356874754833	0.495068308508609	0.350066158096991
chrMT	A7	12001	13001	1	5	2	10.3131974580621	0.0750853931662639	0.0530933906759232
chrMT	A7	12001	13001	1	9	2	13.3564572293652	0.153684516351684	0.108671363675651
chrMT	A8	12001	13001	1	1	2	5.67926128053953	0.174729884696562	0.123552686344882
chrMT	A8	12001	13001	1	10	2	16.0435140325021	0.260307604223464	0.184065272140836
chrMT	A8	12001	13001	1	2	2	9.32247192337834	0.125188911084936	0.088521927957518
chrMT	A8	12001	13001	1	3	3	15.5577402174935	0.490429661631577	0.283149697161568
chrMT	A8	12001	13001	1	4	2	11.9135192594958	0.235725061766894	0.166682789670989
chrMT	A8	12001	13001	1	5	2	12.3918470155984	0.298354795416367	0.210968699038438
chrMT	A8	12001	13001	1	9	2	15.5097881825832	0.00313192198860737	0.00221460327629153
chrMT	B12	12001	13001	1	1	2	9.19700789923587	0.360485369183849	0.254901649068436
chrMT	B12	12001	13001	1	10	2	14.2008685063301	0.225863144982104	0.159709361436966
chrMT	B12	12001	13001	1	2	1	8.55955610620981	NA	NA
chrMT	B12	12001	13001	1	3	3	10.809578479385	0.442200592830284	0.255304631306376
chrMT	B12	12001	13001	1	4	2	8.75514540708281	0.0417274303013475	0.0295057489275719
chrMT	B12	12001	13001	1	5	2	11.95728156603	0.0470027444842823	0.0332359593592146
chrMT	B12	12001	13001	1	9	2	13.7132409021392	0.00191336881779125	0.00135295606597108
chrMT	FOUNDER	13001	14001	0	0	2	7.29418656010654	0.0214699541952719	0.0151815502032413
chrMT	A7	13001	14001	1	1	2	4.18087306931583	0.107738346734659	0.0761825155699047
chrMT	A7	13001	14001	1	10	2	13.6962076487484	0.107992753652552	0.0763624084267276
chrMT	A7	13001	14001	1	2	2	5.9106142078621	0.0948197455086049	0.0670476850395172
chrMT	A7	13001	14001	1	3	2	11.643699825098	0.224056031399894	0.158431539168611
chrMT	A7	13001	14001	1	4	2	15.2033601735812	0.354894540864929	0.250948336451677
chrMT	A7	13001	14001	1	5	2	10.2518598050927	0.120050214261079	0.0848883205869066
chrMT	A7	13001	14001	1	9	2	13.2907106839504	0.54207054056496	0.383301755114941
chrMT	A8	13001	14001	1	1	2	6.01466760044429	0.078356467205709	0.0554063893109782
chrMT	A8	13001	14001	1	10	2	15.6533291419699	0.241650376522611	0.17087261991542
chrMT	A8	13001	14001	1	2	2	9.44041564542902	0.381160076549351	0.26952087484563
chrMT	A8	13001	14001	1	3	3	15.2733123719444	0.362449336633947	0.209260222073211
chrMT	A8	13001	14001	1	4	2	11.8061012201962	0.00232404081657607	0.00164334502115526
chrMT	A8	13001	14001	1	5	2	12.6619667470547	0.0939003021631554	0.066397540415033
chrMT	A8	13001	14001	1	9	2	15.3623337080839	0.00331532564094683	0.00234428924255514
chrMT	B12	13001	14001	1	1	2	9.70049490800818	0.236335232051866	0.167114245217171
chrMT	B12	13001	14001	1	10	2	14.2175975139326	0.053909933078709	0.0381200792532681
chrMT	B12	13001	14001	1	2	1	8.61491466045756	NA	NA
chrMT	B12	13001	14001	1	3	3	10.7110072426319	0.544984230959994	0.314646792448854
chrMT	B12	13001	14001	1	4	2	8.86132565998435	0.584859965181022	0.413558447424029
chrMT	B12	13001	14001	1	5	2	12.1193466722728	0.0257478870045277	0.0182065055021265
chrMT	B12	13001	14001	1	9	2	13.7505372646657	0.163784908325071	0.115813419332675
chrMT	FOUNDER	14001	15001	0	0	2	6.93174010142546	0.0478942230414353	0.0338663298922599
chrMT	A7	14001	15001	1	1	2	4.09173177434884	0.260830983831376	0.184435357410725
chrMT	A7	14001	15001	1	10	2	13.0879692746843	0.361604592315886	0.25569305933476
chrMT	A7	14001	15001	1	2	2	6.02130068570292	0.12957336862202	0.0916222076138142
chrMT	A7	14001	15001	1	3	2	11.3641443235912	0.268692464148224	0.189994263452933
chrMT	A7	14001	15001	1	4	2	14.5129128330453	0.148243910566637	0.104824274431281
chrMT	A7	14001	15001	1	5	2	9.88536727855581	0.0689727600958851	0.0487711063809533
chrMT	A7	14001	15001	1	9	2	12.9647468230448	0.276143954320833	0.195263262683929
chrMT	A8	14001	15001	1	1	2	5.97048902474497	0.137743582810413	0.0973994214701741
chrMT	A8	14001	15001	1	10	2	15.1778801217326	0.271023461393938	0.191642527412304
chrMT	A8	14001	15001	1	2	2	9.03423560829141	0.22527410598167	0.159292847965376
chrMT	A8	14001	15001	1	3	3	15.0566772527007	0.322386711151413	0.186130054466427
chrMT	A8	14001	15001	1	4	2	11.1644639224267	0.256275875080075	0.181214409123638
chrMT	A8	14001	15001	1	5	2	12.4581237716184	0.393819942222234	0.278472751711836
chrMT	A8	14001	15001	1	9	2	14.912551908845	0.420673504331211	0.297461087578108
chrMT	B12	14001	15001	1	1	2	9.7375182607302	0.479209681828917	0.338852415631475
chrMT	B12	14001	15001	1	10	2	13.8072547008206	0.0284648974070214	0.0201277219822842
chrMT	B12	14001	15001	1	2	1	8.75120158930212	NA	NA
chrMT	B12	14001	15001	1	3	3	10.5610860887298	0.673136919695987	0.388635781787954
chrMT	B12	14001	15001	1	4	2	8.80335999844915	0.5730640999076	0.405217511099229
chrMT	B12	14001	15001	1	5	2	11.8189132876665	0.119258125081114	0.0843282289564495
chrMT	B12	14001	15001	1	9	2	13.3080504844689	0.375936177231942	0.265827020214054
chrMT	FOUNDER	15001	16001	0	0	2	6.44205666691235	0.112779926797828	0.0797474510204665
chrMT	A7	15001	16001	1	1	2	4.59104692897431	0.222623044591712	0.157418264479195
chrMT	A7	15001	16001	1	10	2	12.4813324078431	0.350494432306033	0.247836989851725
chrMT	A7	15001	16001	1	2	2	6.27120045396996	0.13565904145034	0.095925428138802
chrMT	A7	15001	16001	1	3	2	10.6799433661314	0.0592770574683649	0.0419152093046655
chrMT	A7	15001	16001	1	4	2	13.42560442443	0.0435080656837599	0.0307648482812963
chrMT	A7	15001	16001	1	5	2	9.67018671005504	0.0834159875913568	0.0589840104852213
chrMT	A7	15001	16001	1	9	2	11.8678465187579	0.390443482969591	0.276085234477892
chrMT	A8	15001	16001	1	1	2	6.35088505400861	0.151663771717445	0.107242481441734
chrMT	A8	15001	16001	1	10	2	14.3899671537743	0.221322679279584	0.156498767348969
chrMT	A8	15001	16001	1	2	2	9.09605213919285	0.144208377282848	0.10197072148061
chrMT	A8	15001	16001	1	3	3	14.0717560200875	0.313561827690463	0.18103500562468
chrMT	A8	15001	16001	1	4	2	10.5605211848887	0.0428296512969916	0.030285136867958
chrMT	A8	15001	16001	1	5	2	11.5311365451002	0.151379499805937	0.107041470845406
chrMT	A8	15001	16001	1	9	2	14.1272005383094	0.0428053088918092	0.0302679241881831
chrMT	B12	15001	16001	1	1	2	9.96419486806668	0.0838253840213013	0.0592734974770286
chrMT	B12	15001	16001	1	10	2	13.0740898990149	0.00104755093368337	0.00074073036884581
chrMT	B12	15001	16001	1	2	1	8.42501014675411	NA	NA
chrMT	B12	15001	16001	1	3	3	9.8554371995353	0.627387111450624	0.36222211768212
chrMT	B12	15001	16001	1	4	2	8.33674652980674	0.299907810699662	0.212066846676542
chrMT	B12	15001	16001	1	5	2	11.0460661706341	0.00285590454332028	0.00201942946900324
chrMT	B12	15001	16001	1	9	2	12.5919137498739	0.0472425733691352	0.0334055439900185
chrMT	FOUNDER	16001	17001	0	0	2	5.39289933195644	0.0723262340027711	0.0511423705210445
chrMT	A7	16001	17001	1	1	2	3.56904959252065	0.190279555275056	0.134547963856153
chrMT	A7	16001	17001	1	10	2	10.2188714812103	0.0535734381305061	0.0378821413935588
chrMT	A7	16001	17001	1	2	2	4.89021564512782	0.0574935867557212	0.0406541050697076
chrMT	A7	16001	17001	1	3	2	9.02112312334307	0.0119173439063759	0.00842683468993055
chrMT	A7	16001	17001	1	4	2	11.3268383916646	0.352384851909846	0.249173718372869
chrMT	A7	16001	17001	1	5	2	8.03685516626724	0.175360675203506	0.123998722589851
chrMT	A7	16001	17001	1	9	2	10.2397671551705	0.0328116578825942	0.0232013457907554
chrMT	A8	16001	17001	1	1	2	3.98561968510068	0.158812249720187	0.112297218712636
chrMT	A8	16001	17001	1	10	2	11.3989116679511	0.406177263782368	0.287210697584309
chrMT	A8	16001	17001	1	2	2	6.53012049556069	0.262373682880562	0.185526210369734
chrMT	A8	16001	17001	1	3	3	10.9442607310452	0.461182422826182	0.26626379596422
chrMT	A8	16001	17001	1	4	2	8.32922788695522	0.00423341865830574	0.00299347904088965
chrMT	A8	16001	17001	1	5	2	9.28056351264437	0.368351444189507	0.260463804046259
chrMT	A8	16001	17001	1	9	2	11.1748673353644	0.118684340690353	0.0839225021228032
chrMT	B12	16001	17001	1	1	2	8.75617421411611	0.0814086784245285	0.0575646285614191
chrMT	B12	16001	17001	1	10	2	10.2723523237561	0.635839582490344	0.449606480525746
chrMT	B12	16001	17001	1	2	1	7.90927733749172	NA	NA
chrMT	B12	16001	17001	1	3	3	7.72511086669557	0.791908263719318	0.457208449231837
chrMT	B12	16001	17001	1	4	2	7.27623476902327	0.444002763389356	0.313957364858179
chrMT	B12	16001	17001	1	5	2	9.46281739145927	0.125324415190121	0.0886177438291726
chrMT	B12	16001	17001	1	9	2	9.88562081156778	0.289695684794444	0.204845783198632
chrMT	FOUNDER	17001	18001	0	0	2	6.67788932691324	0.0302805988888914	0.021411616812725
chrMT	A7	17001	18001	1	1	2	5.68452917949163	0.025697495464844	0.0181708733027017
chrMT	A7	17001	18001	1	10	2	12.7594450576501	0.128839093479618	0.0911029966813652
chrMT	A7	17001	18001	1	2	2	7.01621756106309	0.0746626655714437	0.0527944771270312
chrMT	A7	17001	18001	1	3	2	11.7469886541263	0.39373400414644	0.27841198431568
chrMT	A7	17001	18001	1	4	2	14.3610548344834	0.148351323205993	0.104900226636955
chrMT	A7	17001	18001	1	5	2	10.3737134626237	0.344184546044819	0.243375226487905
chrMT	A7	17001	18001	1	9	2	12.8024049678653	0.184771828609732	0.13065341298218
chrMT	A8	17001	18001	1	1	2	5.79190144126454	0.125476909101207	0.0887255733077916
chrMT	A8	17001	18001	1	10	2	14.3153959357321	0.216334941702997	0.152971904285786
chrMT	A8	17001	18001	1	2	2	8.75229342136126	0.107878224272709	0.0762814239255958
chrMT	A8	17001	18001	1	3	3	13.9253020896672	0.15333754734895	0.0885294742387932
chrMT	A8	17001	18001	1	4	2	10.471717151694	0.119442316934621	0.0844584722651032
chrMT	A8	17001	18001	1	5	2	11.8037189893434	0.217103502882831	0.153515359107803
chrMT	A8	17001	18001	1	9	2	14.2323320025924	0.0920519600583365	0.065090565178763
chrMT	B12	17001	18001	1	1	2	11.320351821353	0.126723887307867	0.0896073200537124
chrMT	B12	17001	18001	1	10	2	13.1218287802801	0.469807511440918	0.33220407719225
chrMT	B12	17001	18001	1	2	1	9.87173434729669	NA	NA
chrMT	B12	17001	18001	1	3	3	10.3756514555659	0.47605969050429	0.274853190462982
chrMT	B12	17001	18001	1	4	2	9.14282048145256	0.406944614115761	0.287753296208598
chrMT	B12	17001	18001	1	5	2	11.6881398079001	0.018047020290659	0.0127611704277362
chrMT	B12	17001	18001	1	9	2	13.0606977220038	0.108306765914893	0.0765844486268046
chrMT	FOUNDER	18001	19001	0	0	2	7.45259090044466	0.0407329592850343	0.0288025517282433
chrMT	A7	18001	19001	1	1	2	7.72646295442368	0.580076899820211	0.410176309472541
chrMT	A7	18001	19001	1	10	2	14.3331304648431	0.0961910942969045	0.0680173750670958
chrMT	A7	18001	19001	1	2	2	9.03250448662816	0.124754413054848	0.0882146914540307
chrMT	A7	18001	19001	1	3	2	13.9274634614042	0.348700369964155	0.246568396203912
chrMT	A7	18001	19001	1	4	2	16.5244269507545	0.343993532896004	0.243240159795082
chrMT	A7	18001	19001	1	5	2	11.6842091521222	0.176911173468116	0.125095090426974
chrMT	A7	18001	19001	1	9	2	14.1460094630913	0.0837711041749054	0.0592351158295603
chrMT	A8	18001	19001	1	1	2	7.33637878487922	0.204555910420771	0.144642871390315
chrMT	A8	18001	19001	1	10	2	16.1809744653467	0.680100099357464	0.480903392141307
chrMT	A8	18001	19001	1	2	2	10.4606986620814	0.0515492187673984	0.0364508021552963
chrMT	A8	18001	19001	1	3	3	15.6624152986352	0.644202050651485	0.371930227356144
chrMT	A8	18001	19001	1	4	2	11.6672727879762	0.0162880131100554	0.0115173645221756
chrMT	A8	18001	19001	1	5	2	12.7682935502627	0.590081772828855	0.417250823021863
chrMT	A8	18001	19001	1	9	2	16.0825902437979	0.113709847866716	0.0804050045142457
chrMT	B12	18001	19001	1	1	2	15.2285937590349	0.410877810346652	0.290534485935198
chrMT	B12	18001	19001	1	10	2	14.9342516927524	0.178788716914761	0.12642271413007
chrMT	B12	18001	19001	1	2	1	11.7253967914895	NA	NA
chrMT	B12	18001	19001	1	3	3	11.9703689836866	0.451689355692457	0.260782971099129
chrMT	B12	18001	19001	1	4	2	11.2291451094395	0.497918783773411	0.352081748486337
chrMT	B12	18001	19001	1	5	2	13.8781449437566	0.824384288360405	0.582927720603289
chrMT	B12	18001	19001	1	9	2	14.8099478056671	0.172905369562544	0.122262559321241
chrMT	FOUNDER	19001	20001	0	0	2	5.26993013851912	0.143561644984381	0.101513412686751
chrMT	A7	19001	20001	1	1	2	5.83982356720148	0.489132870748268	0.345869169807343
chrMT	A7	19001	20001	1	10	2	10.7895046694516	0.124618205365575	0.0881183780732959
chrMT	A7	19001	20001	1	2	2	6.69041592867195	0.308097360108347	0.217857732598286
chrMT	A7	19001	20001	1	3	2	10.3285946103145	0.0715837189103746	0.0506173330640776
chrMT	A7	19001	20001	1	4	2	11.9202835629845	0.696587474253755	0.49256172673444
chrMT	A7	19001	20001	1	5	2	8.38974843519608	0.193126032935146	0.136560727512098
chrMT	A7	19001	20001	1	9	2	10.7657338297744	0.214663651756378	0.151790123831202
chrMT	A8	19001	20001	1	1	2	5.88466755789374	0.241904651307619	0.171052419340185
chrMT	A8	19001	20001	1	10	2	11.7262326550596	0.257797779366571	0.182290557964936
chrMT	A8	19001	20001	1	2	2	7.59355654439631	0.016103188584912	0.0113866738471171
chrMT	A8	19001	20001	1	3	3	11.3653087301002	0.764706488692088	0.441503497097431
chrMT	A8	19001	20001	1	4	2	8.60199085951349	0.142587820425345	0.100824814737371
chrMT	A8	19001	20001	1	5	2	9.0371064027566	0.0146395571930689	0.0103517301647873
chrMT	A8	19001	20001	1	9	2	11.5388040370471	0.269524824093883	0.190582830814896
chrMT	B12	19001	20001	1	1	2	9.04812138444413	0.0930215448584484	0.0657761651658575
chrMT	B12	19001	20001	1	10	2	10.5688338385337	0.451631439207281	0.319351653260508
chrMT	B12	19001	20001	1	2	1	7.43752803708372	NA	NA
chrMT	B12	19001	20001	1	3	3	7.98693791595088	0.804031453720766	0.46420777624261
chrMT	B12	19001	20001	1	4	2	7.46060744566511	0.671724650498105	0.474981055457373
chrMT	B12	19001	20001	1	5	2	9.70066109625383	0.0280207885676321	0.0198136896103671
chrMT	B12	19001	20001	1	9	2	10.5747604327	0.0380261417891739	0.026888542721486
chrMT	FOUNDER	20001	21001	0	0	2	7.19380066594464	0.0343393534371026	0.0242815896769368
chrMT	A7	20001	21001	1	1	2	9.14823720204308	0.516325322582623	0.365097136896504
chrMT	A7	20001	21001	1	10	2	14.7911940679002	0.0514962530543647	0.0364133497404397
chrMT	A7	20001	21001	1	2	2	10.2917702623537	0.2369861843292	0.167574537986702
chrMT	A7	20001	21001	1	3	2	13.4853692360166	0.00278191975809006	0.00196711432566232
chrMT	A7	20001	21001	1	4	2	15.9595979650021	0.646316300673134	0.457014638997377
chrMT	A7	20001	21001	1	5	2	11.8967625755405	0.0324503035674053	0.0229458297040743
chrMT	A7	20001	21001	1	9	2	14.2838151561008	0.223784346718264	0.158239429087886
chrMT	A8	20001	21001	1	1	2	8.51896702605163	0.0469378328328641	0.0331900598903188
chrMT	A8	20001	21001	1	10	2	15.4453842180508	0.364925153275437	0.258041050506602
chrMT	A8	20001	21001	1	2	2	10.436881588431	0.128442289316816	0.0908224137670448
chrMT	A8	20001	21001	1	3	3	15.4089631617067	0.704507415462615	0.406747545963428
chrMT	A8	20001	21001	1	4	2	11.7946574651256	0.0820317020218124	0.0580051727718978
chrMT	A8	20001	21001	1	5	2	11.9360522563675	0.013315125393094	0.00941521545780599
chrMT	A8	20001	21001	1	9	2	15.2208979600884	0.0197555139388929	0.0139692578720165
chrMT	B12	20001	21001	1	1	2	17.1693746904006	0.230211745951858	0.162784286671354
chrMT	B12	20001	21001	1	10	2	15.8315167734811	0.360952185217797	0.255231737851607
chrMT	B12	20001	21001	1	2	1	11.5792301283831	NA	NA
chrMT	B12	20001	21001	1	3	3	11.4917545446187	0.769739748411466	0.444409450951315
chrMT	B12	20001	21001	1	4	2	12.4413870573318	0.61832890820903	0.43722456399828
chrMT	B12	20001	21001	1	5	2	13.4649981941215	0.148324615177144	0.104881341208643
chrMT	B12	20001	21001	1	9	2	15.4093782772556	0.5073826995944	0.358773747539937
chrMT	FOUNDER	21001	22001	0	0	2	5.56125432775788	0.0741550295801374	0.0524355242752041
chrMT	A7	21001	22001	1	1	2	5.76616240164323	0.468320540075401	0.331152629656263
chrMT	A7	21001	22001	1	10	2	11.6889597500408	0.164889388830133	0.116594404987493
chrMT	A7	21001	22001	1	2	2	6.94845491295229	0.198360250501362	0.140261878247375
chrMT	A7	21001	22001	1	3	2	10.9158093289754	0.0382820028164972	0.0270694637889477
chrMT	A7	21001	22001	1	4	2	12.7054050400603	0.746878594472853	0.528122918874832
chrMT	A7	21001	22001	1	5	2	8.90169432860614	0.0932156376200488	0.0659134094737643
chrMT	A7	21001	22001	1	9	2	11.1125497086121	0.626267154052946	0.442837751465238
chrMT	A8	21001	22001	1	1	2	6.87180392830997	0.123197964505356	0.0871141161301168
chrMT	A8	21001	22001	1	10	2	12.1673173093091	0.15106940009902	0.106822197239801
chrMT	A8	21001	22001	1	2	2	8.09584429426858	0.00730469981918894	0.00516520277668064
chrMT	A8	21001	22001	1	3	3	12.2653046222052	0.397218508417989	0.229334212762227
chrMT	A8	21001	22001	1	4	2	9.07046397248922	0.0591295845038149	0.0418109301713905
chrMT	A8	21001	22001	1	5	2	9.49544407381376	0.0525052692719071	0.0371268319501912
chrMT	A8	21001	22001	1	9	2	12.1114569513291	0.00146139165017339	0.001033359945807
chrMT	B12	21001	22001	1	1	2	8.1875913623017	0.0806701779861349	0.0570424298935217
chrMT	B12	21001	22001	1	10	2	10.8089609485651	0.435633402986669	0.308039333363245
chrMT	B12	21001	22001	1	2	1	7.06527033089099	NA	NA
chrMT	B12	21001	22001	1	3	3	8.42182498923619	0.560336188512115	0.323510249274159
chrMT	B12	21001	22001	1	4	2	7.29264125300591	0.552598317759472	0.390746017760001
chrMT	B12	21001	22001	1	5	2	9.52566467763472	0.032184016047651	0.0227575359931107
chrMT	B12	21001	22001	1	9	2	10.7339799500862	0.118147462994823	0.0835428722636262
chrMT	FOUNDER	22001	23001	0	0	2	7.73441263005379	0.336794127176807	0.238149411190525
chrMT	A7	22001	23001	1	1	2	8.12753790738416	0.377618687657975	0.267016734745719
chrMT	A7	22001	23001	1	10	2	14.723850261363	0.483000705469244	0.341533074155189
chrMT	A7	22001	23001	1	2	2	8.79832794690699	0.0628424048536398	0.0444362906180791
chrMT	A7	22001	23001	1	3	2	13.7713874577863	0.10565496233151	0.07470934033062
chrMT	A7	22001	23001	1	4	2	16.3997497994582	0.538856281284538	0.381028930581262
chrMT	A7	22001	23001	1	5	2	12.0306639891981	0.169271147801865	0.119692776469929
chrMT	A7	22001	23001	1	9	2	15.0965440627264	0.427653847772939	0.302396935760765
chrMT	A8	22001	23001	1	1	2	10.0899031014475	0.0430459799044029	0.0304381042932231
chrMT	A8	22001	23001	1	10	2	15.2993884073003	0.447296551126468	0.316286424502881
chrMT	A8	22001	23001	1	2	2	10.6577434862366	0.117729020986053	0.0832469890816911
chrMT	A8	22001	23001	1	3	3	15.8066107433008	0.436584131315596	0.252061965738978
chrMT	A8	22001	23001	1	4	2	11.7000878934921	0.133163722067168	0.0941609708817355
chrMT	A8	22001	23001	1	5	2	12.8039310289546	0.0923321379802576	0.0652886808872921
chrMT	A8	22001	23001	1	9	2	15.3599110572823	0.386507790406863	0.273302279578122
chrMT	B12	22001	23001	1	1	2	8.99182459924636	0.0851830690402998	0.0602335257606779
chrMT	B12	22001	23001	1	10	2	14.2005392931124	0.91351827935816	0.645954970072022
chrMT	B12	22001	23001	1	2	1	7.97277465661248	NA	NA
chrMT	B12	22001	23001	1	3	3	10.8643141738243	0.377221196403587	0.217788759287644
chrMT	B12	22001	23001	1	4	2	8.8123294554603	0.308009108827084	0.217795329518856
chrMT	B12	22001	23001	1	5	2	11.4788177399044	0.347991843798955	0.246067392547851
chrMT	B12	22001	23001	1	9	2	14.068022349331	0.432416068013332	0.30576433398625
chrMT	FOUNDER	23001	24001	0	0	2	6.26520052711297	0.178145741647498	0.125968061958453
chrMT	A7	23001	24001	1	1	2	6.91517268757034	0.519813381555162	0.367563567049165
chrMT	A7	23001	24001	1	10	2	12.8566998021678	0.302695483773776	0.21403802921098
chrMT	A7	23001	24001	1	2	2	7.92825584272125	0.0989849253478967	0.0699929119487419
chrMT	A7	23001	24001	1	3	2	12.1232154707422	0.020795336872969	0.014704523719935
chrMT	A7	23001	24001	1	4	2	13.6246910789723	0.723211137692066	0.511387499691698
chrMT	A7	23001	24001	1	5	2	10.2287288896276	0.150269406622281	0.106256516427494
chrMT	A7	23001	24001	1	9	2	12.597185901015	0.00183258807902045	0.00129583545779699
chrMT	A8	23001	24001	1	1	2	8.57550507045251	0.122572480258784	0.0866718319778403
chrMT	A8	23001	24001	1	10	2	13.1791895076695	0.107566266060488	0.0760608361582875
chrMT	A8	23001	24001	1	2	2	8.99677089327308	0.224195575703545	0.158530211891999
chrMT	A8	23001	24001	1	3	3	13.4995709675796	0.44197353101405	0.255173537105651
chrMT	A8	23001	24001	1	4	2	9.88569189963036	0.149539233618553	0.105740206145118
chrMT	A8	23001	24001	1	5	2	10.3312396731792	0.0712717167506364	0.0503967142211819
chrMT	A8	23001	24001	1	9	2	12.7604069051128	0.456368406880006	0.322701195224154
chrMT	B12	23001	24001	1	1	2	4.12929308846799	0.110729853576653	0.0782978303438449
chrMT	B12	23001	24001	1	10	2	11.5200826824355	0.616700607107892	0.436073181247851
chrMT	B12	23001	24001	1	2	1	4.93780573772243	NA	NA
chrMT	B12	23001	24001	1	3	3	8.76906176033936	0.329103640273074	0.190008075302945
chrMT	B12	23001	24001	1	4	2	6.63636560774539	0.357317700619547	0.252661769146067
chrMT	B12	23001	24001	1	5	2	9.20278932904084	0.291243996056248	0.205940604591241
chrMT	B12	23001	24001	1	9	2	11.281225252648	0.0175478460492323	0.0124082009366298
chrMT	FOUNDER	24001	25001	0	0	2	5.39108018304681	0.144047975941983	0.101857300604773
chrMT	A7	24001	25001	1	1	2	6.3461201416136	0.409757478162686	0.289742291450734
chrMT	A7	24001	25001	1	10	2	12.3907702225736	0.300096773890813	0.2122004638304
chrMT	A7	24001	25001	1	2	2	6.94053850429442	0.15642733809449	0.110610831529574
chrMT	A7	24001	25001	1	3	2	9.84630609492576	0.207836865257529	0.146962856804153
chrMT	A7	24001	25001	1	4	2	12.1834976683621	0.129133827436192	0.0913114050607051
chrMT	A7	24001	25001	1	5	2	9.67831245678206	0.0899896021557675	0.0636322579206228
chrMT	A7	24001	25001	1	9	2	12.3554698639145	0.00212529517216995	0.00150281062826441
chrMT	A8	24001	25001	1	1	2	8.9003242137717	0.0360196704304656	0.0254697532174868
chrMT	A8	24001	25001	1	10	2	11.8407774696573	0.226804242949707	0.160374818191619
chrMT	A8	24001	25001	1	2	2	8.3420377115774	0.198595368736146	0.140428131945572
chrMT	A8	24001	25001	1	3	3	11.7724113152377	0.524715416612086	0.302944587028934
chrMT	A8	24001	25001	1	4	2	8.98697374239466	0.0594269443672636	0.0420211953472878
chrMT	A8	24001	25001	1	5	2	9.51583734847826	0.0567961832279476	0.0401609663059954
chrMT	A8	24001	25001	1	9	2	11.4345590598408	0.0889772455837551	0.062916413723574
chrMT	B12	24001	25001	1	1	2	3.83702256408853	0.00780631526188153	0.00551989845775647
chrMT	B12	24001	25001	1	10	2	10.1927640503294	0.548303917903085	0.387709418500424
chrMT	B12	24001	25001	1	2	1	4.51027492363232	NA	NA
chrMT	B12	24001	25001	1	3	3	7.90894334039044	0.313904866764788	0.181233059326584
chrMT	B12	24001	25001	1	4	2	6.08676347669442	0.431475511119477	0.305099259828514
chrMT	B12	24001	25001	1	5	2	7.86271114978464	0.0631526584124608	0.0446556730134087
chrMT	B12	24001	25001	1	9	2	10.2412401573089	0.185209865932447	0.130963152143485
chrMT	FOUNDER	25001	26001	0	0	2	6.92755454171222	0.443393662268145	0.313526665324943
chrMT	A7	25001	26001	1	1	2	7.8037232280059	0.284680872243067	0.201299775237174
chrMT	A7	25001	26001	1	10	2	15.2822750651282	0.120487246872122	0.0851973493097749
chrMT	A7	25001	26001	1	2	2	8.27570272263393	0.0030201831976062	0.00213559201945301
chrMT	A7	25001	26001	1	3	2	10.9713296304327	0.0171730219054519	0.0121431602428101
chrMT	A7	25001	26001	1	4	2	14.0952563599408	0.320622018195578	0.22671400326381
chrMT	A7	25001	26001	1	5	2	11.678754958544	0.0453340397780269	0.0320560069456235
chrMT	A7	25001	26001	1	9	2	15.7034728286471	0.579784736603469	0.409969718880769
chrMT	A8	25001	26001	1	1	2	12.242162713566	0.38654643139447	0.27332960288249
chrMT	A8	25001	26001	1	10	2	12.9136915469075	0.363827968501772	0.257265223712928
chrMT	A8	25001	26001	1	2	2	10.0070907049206	0.121660262595409	0.08602679668215
chrMT	A8	25001	26001	1	3	3	14.9224426297047	0.298080412820436	0.172096806582033
chrMT	A8	25001	26001	1	4	2	11.0043849112148	0.112212728191426	0.0793463810396
chrMT	A8	25001	26001	1	5	2	11.7779017493268	0.381644741022276	0.269863584381035
chrMT	A8	25001	26001	1	9	2	13.3601444948897	0.321100446496455	0.227052303159671
chrMT	B12	25001	26001	1	1	2	5.80668992606027	0.178270959478738	0.126056604336048
chrMT	B12	25001	26001	1	10	2	12.66714575783	0.739382977734516	0.522822717449978
chrMT	B12	25001	26001	1	2	1	5.77535086407622	NA	NA
chrMT	B12	25001	26001	1	3	3	9.57264337751274	0.286043180893631	0.165147107488795
chrMT	B12	25001	26001	1	4	2	7.12730675895349	0.152960334276333	0.108159289619356
chrMT	B12	25001	26001	1	5	2	9.16690155202478	0.277869617578596	0.196483490875538
chrMT	B12	25001	26001	1	9	2	12.678572999397	0.279211893983332	0.197432623623554
chrMT	FOUNDER	26001	27001	0	0	2	7.46854532239006	0.0669167865367529	0.0473173135353506
chrMT	A7	26001	27001	1	1	2	7.73672153116818	0.4468984419299	0.316004918790335
chrMT	A7	26001	27001	1	10	2	16.9021585191979	0.155823774376328	0.110184047531584
chrMT	A7	26001	27001	1	2	2	8.84795638412594	0.00207783686305937	0.00146925253606867
chrMT	A7	26001	27001	1	3	2	12.0008911728911	0.0344108149064092	0.024332120566477
chrMT	A7	26001	27001	1	4	2	15.3630422174177	0.437180294006354	0.309133150493022
chrMT	A7	26001	27001	1	5	2	11.9980503207919	0.0305024930869304	0.0215685197048643
chrMT	A7	26001	27001	1	9	2	16.4116420183024	0.258985229949745	0.183130212324622
chrMT	A8	26001	27001	1	1	2	9.00443105022129	0.106187038474449	0.0750855749793997
chrMT	A8	26001	27001	1	10	2	15.3642602123987	0.298321499163796	0.210945155032457
chrMT	A8	26001	27001	1	2	2	9.90112581516786	0.136623627878517	0.0966074937432069
chrMT	A8	26001	27001	1	3	3	15.723005331666	0.450813397192523	0.260277236223393
chrMT	A8	26001	27001	1	4	2	11.7078859981495	0.400048347499926	0.28287689931967
chrMT	A8	26001	27001	1	5	2	12.5551415638721	0.129519835964285	0.0915843543085151
chrMT	A8	26001	27001	1	9	2	14.917162236816	0.000821313070688521	0.000580756041760999
chrMT	B12	26001	27001	1	1	2	5.44692690056435	0.422121913567919	0.298485267571317
chrMT	B12	26001	27001	1	10	2	13.5605481944438	0.162929461363698	0.115208526985342
chrMT	B12	26001	27001	1	2	1	5.86675709738748	NA	NA
chrMT	B12	26001	27001	1	3	3	10.0868747471263	0.471299610050082	0.27210495673138
chrMT	B12	26001	27001	1	4	2	7.59382732526821	0.241714557307895	0.170918002583917
chrMT	B12	26001	27001	1	5	2	10.2335236016558	0.0445255921604672	0.0314843481530129
chrMT	B12	26001	27001	1	9	2	13.4016355907807	0.193252375838634	0.136650065435909
chrMT	FOUNDER	27001	28001	0	0	2	6.65065439949729	0.137840380795033	0.0974678679815035
chrMT	A7	27001	28001	1	1	2	5.56433874894884	0.174404298735409	0.123322462303892
chrMT	A7	27001	28001	1	10	2	13.8691606080454	0.345923400618939	0.244604782348762
chrMT	A7	27001	28001	1	2	2	6.93164326685228	0.159027182163992	0.112449198901147
chrMT	A7	27001	28001	1	3	2	10.3996771682404	0.00662632363256293	0.00468551837492193
chrMT	A7	27001	28001	1	4	2	13.9835037309033	0.507964707467222	0.359185289253514
chrMT	A7	27001	28001	1	5	2	10.486340713438	0.243428887720492	0.172130217243859
chrMT	A7	27001	28001	1	9	2	13.2222685976293	0.194522499230723	0.137548178299399
chrMT	A8	27001	28001	1	1	2	6.16099877788544	0.201358533910915	0.14238198477819
chrMT	A8	27001	28001	1	10	2	13.4943936826586	0.225004503175317	0.159102209992777
chrMT	A8	27001	28001	1	2	2	8.00677133044781	0.00990025169309487	0.00700053510764098
chrMT	A8	27001	28001	1	3	3	13.3051726893684	0.603760385746298	0.348581221236657
chrMT	A8	27001	28001	1	4	2	10.3284569196199	0.12540900176604	0.0886775555706025
chrMT	A8	27001	28001	1	5	2	11.2256875194555	0.0790442446275397	0.0558927213899016
chrMT	A8	27001	28001	1	9	2	13.700764977817	0.274940856592248	0.194412544121617
chrMT	B12	27001	28001	1	1	2	4.11672622266227	0.117050838209439	0.0827674414414634
chrMT	B12	27001	28001	1	10	2	12.2965735304571	0.230498188472122	0.162986832119852
chrMT	B12	27001	28001	1	2	1	4.83345438232969	NA	NA
chrMT	B12	27001	28001	1	3	3	8.73256696737282	0.40572541511833	0.234245677635641
chrMT	B12	27001	28001	1	4	2	6.78494471771786	0.0823063769424657	0.0581993972709136
chrMT	B12	27001	28001	1	5	2	9.03234661563907	0.365787995503333	0.258651172097041
chrMT	B12	27001	28001	1	9	2	11.4123507494441	0.387681168916783	0.274131983479385
chrMT	FOUNDER	28001	29001	0	0	2	7.20790622432147	0.259303937017096	0.183355572253158
chrMT	A7	28001	29001	1	1	2	5.27462748749359	0.294758215649484	0.208425533096197
chrMT	A7	28001	29001	1	10	2	13.1680382287309	0.0517402187566784	0.0365858595429227
chrMT	A7	28001	29001	1	2	2	6.71208491885272	0.0928425805639496	0.0656496182996271
chrMT	A7	28001	29001	1	3	2	11.1471604179633	0.059263266528056	0.0419054576372542
chrMT	A7	28001	29001	1	4	2	14.4926552693444	0.55168856214269	0.390102723394152
chrMT	A7	28001	29001	1	5	2	11.1459593662355	0.180404538444471	0.127565272490915
chrMT	A7	28001	29001	1	9	2	13.0446512528563	0.263663156404507	0.186438005842676
chrMT	A8	28001	29001	1	1	2	4.33784210859708	0.0128876269330999	0.00911292839779732
chrMT	A8	28001	29001	1	10	2	14.4995484363121	0.294817422063724	0.208467398353195
chrMT	A8	28001	29001	1	2	2	7.80034334749572	0.100159841093268	0.0708237028396166
chrMT	A8	28001	29001	1	3	3	13.8901907453907	0.10052178269329	0.058036278297392
chrMT	A8	28001	29001	1	4	2	10.6044242315414	0.0577057263908792	0.0408041104442862
chrMT	A8	28001	29001	1	5	2	11.5962817044783	0.218731079226052	0.154666229376994
chrMT	A8	28001	29001	1	9	2	14.4628487271693	0.211085231658769	0.149259798714249
chrMT	B12	28001	29001	1	1	2	3.73325803562178	0.0243681535300588	0.0172308866060995
chrMT	B12	28001	29001	1	10	2	13.1326514797912	0.146615561074791	0.103672857463455
chrMT	B12	28001	29001	1	2	1	5.35368380578045	NA	NA
chrMT	B12	28001	29001	1	3	3	9.77583754090366	0.486312442976183	0.280772619862564
chrMT	B12	28001	29001	1	4	2	7.36696066091479	0.425528498725655	0.300894087037042
chrMT	B12	28001	29001	1	5	2	9.8614555338008	0.255094348237288	0.180378943480949
chrMT	B12	28001	29001	1	9	2	12.9030153631401	0.331912852746773	0.234697828940215
chrMT	FOUNDER	29001	30001	0	0	2	7.92697482015114	0.15770464733777	0.11151402555717
chrMT	A7	29001	30001	1	1	2	5.16348127619295	0.339543701787487	0.240093654043115
chrMT	A7	29001	30001	1	10	2	13.4175762401764	0.13043327291661	0.0922302517716904
chrMT	A7	29001	30001	1	2	2	6.86703649519719	0.169876802549982	0.12012103904938
chrMT	A7	29001	30001	1	3	2	11.3659277138188	0.130132172295428	0.0920173414806333
chrMT	A7	29001	30001	1	4	2	15.1640201853277	0.301124948957194	0.212927493392085
chrMT	A7	29001	30001	1	5	2	11.3074135478754	0.0826721197412495	0.0584580164841038
chrMT	A7	29001	30001	1	9	2	13.5184916322141	0.163682508791107	0.115741011927819
chrMT	A8	29001	30001	1	1	2	4.02440074816143	0.000573182704394714	0.000405301377136347
chrMT	A8	29001	30001	1	10	2	14.9688669864018	0.111314659512377	0.0787113505866737
chrMT	A8	29001	30001	1	2	2	7.99152581723077	0.1038862707806	0.073458686541144
chrMT	A8	29001	30001	1	3	3	14.3377079340214	0.236966672970645	0.136812772428572
chrMT	A8	29001	30001	1	4	2	10.9149259362869	0.118090280516273	0.0835024381452785
chrMT	A8	29001	30001	1	5	2	12.2841497668358	0.202368742004162	0.143096309771334
chrMT	A8	29001	30001	1	9	2	14.5528236128159	0.320663378980817	0.226743249755527
chrMT	B12	29001	30001	1	1	2	3.71729169014812	0.0839258320002168	0.0593445249240763
chrMT	B12	29001	30001	1	10	2	13.6000579857277	0.360535144575155	0.254936845585164
chrMT	B12	29001	30001	1	2	1	5.29067780317433	NA	NA
chrMT	B12	29001	30001	1	3	3	10.0915338450871	0.358780724642888	0.20714214795262
chrMT	B12	29001	30001	1	4	2	7.55616650449744	0.332640358088548	0.235212252900734
chrMT	B12	29001	30001	1	5	2	10.0997232012584	0.207088523543014	0.146433699303175
chrMT	B12	29001	30001	1	9	2	13.0848151853687	0.222498742413141	0.157330369565811
chrMT	FOUNDER	30001	31001	0	0	2	6.63137648710817	0.0834562945488047	0.0590125118081617
chrMT	A7	30001	31001	1	1	2	4.4214324946266	0.182584533429209	0.129106761727576
chrMT	A7	30001	31001	1	10	2	11.7529833127546	0.0988889622451333	0.0699250557880342
chrMT	A7	30001	31001	1	2	2	6.06112518519487	0.120327429807631	0.0850843415797242
chrMT	A7	30001	31001	1	3	2	9.87967021730474	0.404730454247944	0.286187648751433
chrMT	A7	30001	31001	1	4	2	13.0768481640905	0.181467376385655	0.128316812406428
chrMT	A7	30001	31001	1	5	2	9.94481537097808	0.11507301710299	0.0813689107251196
chrMT	A7	30001	31001	1	9	2	11.8609489353922	0.259644471279261	0.183596366339161
chrMT	A8	30001	31001	1	1	2	3.31919065485861	0.128013307251951	0.0905190776399716
chrMT	A8	30001	31001	1	10	2	12.7229138419249	0.210581246689128	0.148903427524599
chrMT	A8	30001	31001	1	2	2	6.95828311509816	0.00687981207158383	0.004864761769106
chrMT	A8	30001	31001	1	3	3	12.365687405441	0.530975943703381	0.306559104030363
chrMT	A8	30001	31001	1	4	2	9.35936682517921	0.179182943788916	0.126701474626111
chrMT	A8	30001	31001	1	5	2	10.790769407758	0.455996858189558	0.322438470625597
chrMT	A8	30001	31001	1	9	2	12.9618968881697	0.272799762446611	0.192898561932078
chrMT	B12	30001	31001	1	1	2	3.1157020649491	0.131669620356682	0.0931044814304678
chrMT	B12	30001	31001	1	10	2	12.1496367873914	0.892268276444562	0.630928948911583
chrMT	B12	30001	31001	1	2	1	4.76376220280691	NA	NA
chrMT	B12	30001	31001	1	3	3	8.74402547169919	0.322357199282184	0.186113015780783
chrMT	B12	30001	31001	1	4	2	6.67513105437332	0.173841187480485	0.122924282516973
chrMT	B12	30001	31001	1	5	2	8.62108940818138	0.00775616815206426	0.00548443909634777
chrMT	B12	30001	31001	1	9	2	11.6193431345935	0.127279380993276	0.0900001134055719
chrMT	FOUNDER	31001	32001	0	0	2	7.12360613938469	0.197819940293061	0.139879821235141
chrMT	A7	31001	32001	1	1	2	4.90642029100509	0.169000959132816	0.119501724229845
chrMT	A7	31001	32001	1	10	2	12.3941694717132	0.231145143941033	0.163444298719045
chrMT	A7	31001	32001	1	2	2	6.3690595178318	0.269823682883615	0.190794155891733
chrMT	A7	31001	32001	1	3	2	10.7452203279485	0.0363429113597086	0.0256983190705116
chrMT	A7	31001	32001	1	4	2	14.0952641931834	0.336825705351105	0.238171740331708
chrMT	A7	31001	32001	1	5	2	10.7198734008367	0.242880197566615	0.171742234715282
chrMT	A7	31001	32001	1	9	2	12.449563414883	0.203513924086867	0.143906075787708
chrMT	A8	31001	32001	1	1	2	3.60118574116301	0.22924961476742	0.162103957186446
chrMT	A8	31001	32001	1	10	2	13.3034418170602	0.719736286832854	0.508930409085537
chrMT	A8	31001	32001	1	2	2	7.30513230204844	0.0985946858792415	0.0697169709741692
chrMT	A8	31001	32001	1	3	3	12.9573297583236	0.409930011376044	0.236673202416865
chrMT	A8	31001	32001	1	4	2	9.86063451469653	0.214486307933696	0.151664722811582
chrMT	A8	31001	32001	1	5	2	11.7832684053302	0.286296744571192	0.202442369517922
chrMT	A8	31001	32001	1	9	2	14.1599335422889	0.206735363694557	0.146183977579488
chrMT	B12	31001	32001	1	1	2	3.25258675853275	0.0287868797147326	0.0203553978554889
chrMT	B12	31001	32001	1	10	2	13.0584621878386	0.436547172168729	0.30868546574832
chrMT	B12	31001	32001	1	2	1	4.9977997564779	NA	NA
chrMT	B12	31001	32001	1	3	3	9.39304529315462	0.266322979085775	0.153761643666555
chrMT	B12	31001	32001	1	4	2	7.24983769026298	0.153931823704844	0.108846236382107
chrMT	B12	31001	32001	1	5	2	9.5023807859645	0.284465510242141	0.201147491305909
chrMT	B12	31001	32001	1	9	2	12.2375876616011	0.255831463468709	0.180900162659603
chrMT	FOUNDER	32001	33001	0	0	2	8.06770096223268	0.170177302417581	0.120333524543506
chrMT	A7	32001	33001	1	1	2	5.45579091971945	0.332297863725236	0.234970072813918
chrMT	A7	32001	33001	1	10	2	14.2445531248158	0.13128473299793	0.0928323249691019
chrMT	A7	32001	33001	1	2	2	6.96314071245484	0.0224990128032157	0.0159092045231568
chrMT	A7	32001	33001	1	3	2	12.141507618659	0.109517952403901	0.077440886806464
chrMT	A7	32001	33001	1	4	2	15.8228814060024	0.310908025959222	0.219845173481089
chrMT	A7	32001	33001	1	5	2	12.2629926484787	0.056779744006299	0.0401493420208903
chrMT	A7	32001	33001	1	9	2	14.2479119480702	0.107481224200936	0.0760007024827134
chrMT	A8	32001	33001	1	1	2	3.94779169854267	0.124236700985403	0.0878486137390237
chrMT	A8	32001	33001	1	10	2	15.6875709884848	0.0996264016989679	0.0704465042265552
chrMT	A8	32001	33001	1	2	2	8.37135478690574	0.217646558258721	0.153899357246654
chrMT	A8	32001	33001	1	3	3	14.9956187772508	0.484951028533441	0.279986606867568
chrMT	A8	32001	33001	1	4	2	11.5756280221139	0.237479328109958	0.167923243298176
chrMT	A8	32001	33001	1	5	2	12.6190517736796	0.0497156085619016	0.0351542439449366
chrMT	A8	32001	33001	1	9	2	15.5182069527777	0.10421885678661	0.0736938603613213
chrMT	B12	32001	33001	1	1	2	3.59559119956089	0.135687791652178	0.0959457576014824
chrMT	B12	32001	33001	1	10	2	14.5692523820392	0.0784191402516744	0.0554507058467779
chrMT	B12	32001	33001	1	2	1	4.95078290218529	NA	NA
chrMT	B12	32001	33001	1	3	3	10.8052723041323	0.615424668486886	0.35531559801684
chrMT	B12	32001	33001	1	4	2	7.94649785675423	0.349628937080159	0.247224992308425
chrMT	B12	32001	33001	1	5	2	10.8303605833508	0.394953233253195	0.279274109484886
chrMT	B12	32001	33001	1	9	2	13.6792703889858	0.129106576654547	0.091292135848211
chrMT	FOUNDER	33001	34001	0	0	2	7.80620006112334	0.250792621908776	0.177337163623249
chrMT	A7	33001	34001	1	1	2	5.59698719743679	0.0563431417888117	0.0398406176322239
chrMT	A7	33001	34001	1	10	2	14.1979829034999	0.0409817547848648	0.0289784767133021
chrMT	A7	33001	34001	1	2	2	7.32203179647893	0.0518297836450979	0.0366491914828804
chrMT	A7	33001	34001	1	3	2	11.6166429971899	0.189609896907222	0.134074443883179
chrMT	A7	33001	34001	1	4	2	15.5614506716789	0.599760445870653	0.424094678362606
chrMT	A7	33001	34001	1	5	2	11.7201913288973	0.169506272191897	0.119859034520543
chrMT	A7	33001	34001	1	9	2	13.5675680519113	0.503339659393988	0.355914886397616
chrMT	A8	33001	34001	1	1	2	4.25945510708121	0.0549566262699376	0.0388602031066076
chrMT	A8	33001	34001	1	10	2	15.3025177832911	0.148153317479656	0.104760215445149
chrMT	A8	33001	34001	1	2	2	8.36788991634645	0.204751416654822	0.144781115174177
chrMT	A8	33001	34001	1	3	3	14.274113763827	0.549791128994744	0.317422056323184
chrMT	A8	33001	34001	1	4	2	11.3531947584894	0.0951347684040414	0.0672704398651094
chrMT	A8	33001	34001	1	5	2	12.2823266845516	0.0377478269507061	0.0266917444119006
chrMT	A8	33001	34001	1	9	2	15.122509855655	0.299217505296464	0.211578727044851
chrMT	B12	33001	34001	1	1	2	3.27068039171456	0.0337314208342141	0.02385171641093
chrMT	B12	33001	34001	1	10	2	13.5986911455918	0.383406304481135	0.271109197848284
chrMT	B12	33001	34001	1	2	1	4.96902569798987	NA	NA
chrMT	B12	33001	34001	1	3	3	10.0917493980863	0.703084594044579	0.405926079634717
chrMT	B12	33001	34001	1	4	2	7.6824107773833	0.475084170415991	0.335935238535532
chrMT	B12	33001	34001	1	5	2	10.4734920973871	0.356726752593493	0.252243905789514
chrMT	B12	33001	34001	1	9	2	13.372613614148	0.259517383487478	0.183506501699785
chrMT	FOUNDER	34001	35001	0	0	2	7.14890884271096	0.23170090813903	0.16383728335219
chrMT	A7	34001	35001	1	1	2	5.82813820665847	0.448819005562715	0.317362962358799
chrMT	A7	34001	35001	1	10	2	14.3028367710497	0.172953342402019	0.122296481241347
chrMT	A7	34001	35001	1	2	2	7.7717135989582	0.052415539177662	0.0370633831920739
chrMT	A7	34001	35001	1	3	2	12.0413796007351	0.116780781057235	0.0825764821978323
chrMT	A7	34001	35001	1	4	2	15.7551416068406	0.682399423227047	0.482529259641634
chrMT	A7	34001	35001	1	5	2	11.6610191419975	0.0683928451299588	0.0483610445760352
chrMT	A7	34001	35001	1	9	2	13.5041784777708	0.63621596514702	0.449872623254602
chrMT	A8	34001	35001	1	1	2	4.42987632124775	0.118781621360565	0.0839912899443886
chrMT	A8	34001	35001	1	10	2	15.7663126325947	0.0331098685377234	0.0234122125672194
chrMT	A8	34001	35001	1	2	2	8.50261431639565	0.27955562382591	0.197675677326137
chrMT	A8	34001	35001	1	3	3	14.242276119444	0.738785858079822	0.426538214035874
chrMT	A8	34001	35001	1	4	2	11.3532235154584	0.00134337686096978	0.000949910888080829
chrMT	A8	34001	35001	1	5	2	11.8637495395	0.270061422064678	0.190962262878816
chrMT	A8	34001	35001	1	9	2	15.8015973787424	0.219913930264718	0.155502631367567
chrMT	B12	34001	35001	1	1	2	3.16456967305747	0.0934256214830203	0.0660618904872112
chrMT	B12	34001	35001	1	10	2	13.242880514779	0.0834577364779465	0.0590135314060358
chrMT	B12	34001	35001	1	2	1	4.83153183944631	NA	NA
chrMT	B12	34001	35001	1	3	3	10.1873477328444	0.834247342103896	0.481652927534414
chrMT	B12	34001	35001	1	4	2	7.75406152750424	0.307577479128292	0.217490121231879
chrMT	B12	34001	35001	1	5	2	10.3189789889399	0.45262369975563	0.32005328742295
chrMT	B12	34001	35001	1	9	2	12.8935397165152	0.111060292332532	0.0785314858288935
chrMT	FOUNDER	35001	36001	0	0	2	6.30695239820174	0.225449077578061	0.159416571567699
chrMT	A7	35001	36001	1	1	2	5.5823244431353	0.276972132517363	0.195848873102726
chrMT	A7	35001	36001	1	10	2	11.0744705032036	0.00796934088609635	0.00563517498214594
chrMT	A7	35001	36001	1	2	2	6.48056469776911	0.0178726555156331	0.0126378759129153
chrMT	A7	35001	36001	1	3	2	9.63924511630884	0.20996104156403	0.148464876274916
chrMT	A7	35001	36001	1	4	2	13.4982508128873	0.233363270642708	0.16501275115133
chrMT	A7	35001	36001	1	5	2	9.48411959201817	0.0399811657120716	0.0282709533947489
chrMT	A7	35001	36001	1	9	2	11.0581543487571	0.354656372394084	0.250779925910878
chrMT	A8	35001	36001	1	1	2	4.01915750379532	0.126369466903746	0.089356706982568
chrMT	A8	35001	36001	1	10	2	12.2492827193702	0.165339243809207	0.116912500493746
chrMT	A8	35001	36001	1	2	2	6.85618637883281	0.077847273212799	0.055046334785652
chrMT	A8	35001	36001	1	3	3	11.7933517466436	0.186881138507842	0.107895875623966
chrMT	A8	35001	36001	1	4	2	9.14422673359225	0.221103041158436	0.156343459744098
chrMT	A8	35001	36001	1	5	2	10.2026738570147	0.0392124619094871	0.0277273977232175
chrMT	A8	35001	36001	1	9	2	12.5621851906126	0.00586661451643558	0.00414832290717904
chrMT	B12	35001	36001	1	1	2	2.73405747259639	0.0576893685789303	0.0407925437245318
chrMT	B12	35001	36001	1	10	2	11.0607415665149	0.893286483373023	0.631648929935348
chrMT	B12	35001	36001	1	2	1	4.18973362100271	NA	NA
chrMT	B12	35001	36001	1	3	3	8.19931838542271	0.316376922952531	0.182660301632029
chrMT	B12	35001	36001	1	4	2	6.28603584404226	0.656299021503675	0.464073488591344
chrMT	B12	35001	36001	1	5	2	8.28391233808637	0.118418777708017	0.0837347207371613
chrMT	B12	35001	36001	1	9	2	10.4926291304116	0.0606399065999585	0.0428788891673495
chrMT	FOUNDER	36001	37001	0	0	2	7.34324075154396	0.204406771995414	0.14453741459841
chrMT	A7	36001	37001	1	1	2	5.59549898600004	0.154901016655716	0.109531559289947
chrMT	A7	36001	37001	1	10	2	12.5530669562258	0.550430859717092	0.389213393480297
chrMT	A7	36001	37001	1	2	2	6.99052981530191	0.113667679286698	0.0803751868253619
chrMT	A7	36001	37001	1	3	2	10.6154590521483	0.0582214945192922	0.0411688135854069
chrMT	A7	36001	37001	1	4	2	14.5494459059065	0.593478980639643	0.419653011701971
chrMT	A7	36001	37001	1	5	2	11.1242799699179	0.100933075563958	0.0713704621772893
chrMT	A7	36001	37001	1	9	2	12.5847707035183	0.305331081724816	0.215901678394641
chrMT	A8	36001	37001	1	1	2	4.56492044390045	0.146729510711699	0.103753432024427
chrMT	A8	36001	37001	1	10	2	13.809520637371	0.459789793239326	0.325120480719888
chrMT	A8	36001	37001	1	2	2	7.74253817878667	0.119419303488605	0.0844421993013671
chrMT	A8	36001	37001	1	3	3	13.1645634139253	0.430374002340799	0.248476546103677
chrMT	A8	36001	37001	1	4	2	10.4113469520058	0.0711425565105554	0.0503053841395609
chrMT	A8	36001	37001	1	5	2	11.423917397286	0.183122818006463	0.12948738640236
chrMT	A8	36001	37001	1	9	2	13.7664817789533	0.031185196350243	0.0220512638118908
chrMT	B12	36001	37001	1	1	2	2.86737802674326	0.10761391159146	0.0760945266363307
chrMT	B12	36001	37001	1	10	2	12.4016847742699	0.762900327822168	0.539451995172495
chrMT	B12	36001	37001	1	2	1	4.65490355243202	NA	NA
chrMT	B12	36001	37001	1	3	3	9.51836434326993	0.452953162310076	0.261512630190015
chrMT	B12	36001	37001	1	4	2	7.08809430321896	0.445756350134058	0.315197337936758
chrMT	B12	36001	37001	1	5	2	9.39692757830764	0.250554916627086	0.177169080606642
chrMT	B12	36001	37001	1	9	2	12.1634330773314	0.0460942366827268	0.0325935473319738
chrMT	FOUNDER	37001	38001	0	0	2	6.63342879061127	0.200329506855134	0.141654352769022
chrMT	A7	37001	38001	1	1	2	6.32282510484551	0.236313276758978	0.167098720480686
chrMT	A7	37001	38001	1	10	2	12.0881321152892	0.300472092033501	0.212465853834197
chrMT	A7	37001	38001	1	2	2	7.41787866920294	0.120409051031452	0.0851420565005765
chrMT	A7	37001	38001	1	3	2	10.2661172550592	0.147046452760006	0.103977543896027
chrMT	A7	37001	38001	1	4	2	14.0131035051102	0.238184476939025	0.168421858816956
chrMT	A7	37001	38001	1	5	2	11.0117159558388	0.354867574314812	0.250929268221225
chrMT	A7	37001	38001	1	9	2	12.0500838124126	0.337245266502275	0.238468414866823
chrMT	A8	37001	38001	1	1	2	5.67967008382688	0.0913888929215788	0.0646217059099796
chrMT	A8	37001	38001	1	10	2	13.33683144201	0.0935418303719251	0.06614406258059
chrMT	A8	37001	38001	1	2	2	8.02328595117237	0.0733225111831464	0.0518468448712293
chrMT	A8	37001	38001	1	3	3	12.6587747229666	0.189099423691261	0.109176603171753
chrMT	A8	37001	38001	1	4	2	9.97131316164988	0.166391914125514	0.117656850812761
chrMT	A8	37001	38001	1	5	2	10.8241943132384	0.0386520944537788	0.0273311580953299
chrMT	A8	37001	38001	1	9	2	13.1495346841882	0.351384548332611	0.248466396930161
chrMT	B12	37001	38001	1	1	2	2.8192814150641	0.105655230321759	0.0747095298283422
chrMT	B12	37001	38001	1	10	2	12.0489913215854	0.0880596643034459	0.0622675857779775
chrMT	B12	37001	38001	1	2	1	4.41621985345951	NA	NA
chrMT	B12	37001	38001	1	3	3	9.09656809749022	0.257877637483845	0.148885723419283
chrMT	B12	37001	38001	1	4	2	6.85945598780429	0.317187625210068	0.224285520694496
chrMT	B12	37001	38001	1	5	2	9.06224395332621	0.26829476733557	0.189713049339849
chrMT	B12	37001	38001	1	9	2	11.3690706681169	0.472194000425338	0.33389157973636
chrMT	FOUNDER	38001	39001	0	0	2	7.81830348673549	0.051029197207669	0.0360830913840484
chrMT	A7	38001	39001	1	1	2	9.69662820976128	0.428008557954095	0.302647753735216
chrMT	A7	38001	39001	1	10	2	13.8237527000204	0.0875071254453844	0.0618768818045732
chrMT	A7	38001	39001	1	2	2	10.5279237326416	0.321860082743231	0.227589447101002
chrMT	A7	38001	39001	1	3	2	12.9922475945706	0.213403137076416	0.150898805353216
chrMT	A7	38001	39001	1	4	2	16.6758483166888	0.703819827130449	0.497675772497484
chrMT	A7	38001	39001	1	5	2	12.2173143146283	0.0874713726023572	0.0618516007268219
chrMT	A7	38001	39001	1	9	2	14.0281693805266	0.123801250061694	0.0875407034379956
chrMT	A8	38001	39001	1	1	2	14.3610760805149	0.476268272378465	0.336772525062814
chrMT	A8	38001	39001	1	10	2	15.6209615684164	0.443772831499212	0.313794778459448
chrMT	A8	38001	39001	1	2	2	12.7681868683846	0.0571445655622162	0.0404073098170024
chrMT	A8	38001	39001	1	3	3	15.6897134830228	0.489927775699683	0.282859933183687
chrMT	A8	38001	39001	1	4	2	12.4555406649671	0.421690962001977	0.298180538796677
chrMT	A8	38001	39001	1	5	2	12.5981109179296	0.0514879034562559	0.0364074456829968
chrMT	A8	38001	39001	1	9	2	15.1419935345284	0.199573024286574	0.141119438814944
chrMT	B12	38001	39001	1	1	2	3.46182962363139	0.0210544320877763	0.0148877317032983
chrMT	B12	38001	39001	1	10	2	13.7248601288786	0.354346540203185	0.250560841467664
chrMT	B12	38001	39001	1	2	1	5.21703372994681	NA	NA
chrMT	B12	38001	39001	1	3	3	10.5003343914342	0.650979584812957	0.375843238528712
chrMT	B12	38001	39001	1	4	2	7.77077099259864	0.272783185118887	0.19288683999123
chrMT	B12	38001	39001	1	5	2	10.7777668518736	0.421961583056176	0.298371896779233
chrMT	B12	38001	39001	1	9	2	13.3164602387706	0.0662337153549625	0.0468343092706736
chrMT	FOUNDER	39001	40001	0	0	2	6.6513799443382	0.0566815638699956	0.0400799181807323
chrMT	A7	39001	40001	1	1	2	8.96011830056801	0.26250161480851	0.185616671903516
chrMT	A7	39001	40001	1	10	2	11.8130980062399	0.347059576712557	0.245408180169182
chrMT	A7	39001	40001	1	2	2	9.33250824527478	0.0279145076074119	0.0197385376226844
chrMT	A7	39001	40001	1	3	2	10.9772864886075	0.0359030428262255	0.0253872850476551
chrMT	A7	39001	40001	1	4	2	14.5329590999474	0.0776260251727464	0.0548898887962066
chrMT	A7	39001	40001	1	5	2	11.1069325840666	0.244411113607576	0.172824755829272
chrMT	A7	39001	40001	1	9	2	12.472340510863	0.158871096837376	0.112338829908254
chrMT	A8	39001	40001	1	1	2	32.6981318001315	1.08183910824048	0.764975769589649
chrMT	A8	39001	40001	1	10	2	12.8992374470776	0.62820693031454	0.444209380413796
chrMT	A8	39001	40001	1	2	2	17.3688637118114	0.0964592512030913	0.0682069906338825
chrMT	A8	39001	40001	1	3	3	15.8929165206875	0.448445906289554	0.25891036471326
chrMT	A8	39001	40001	1	4	2	11.2729515789098	0.0833325955585851	0.0589250434133515
chrMT	A8	39001	40001	1	5	2	11.488670427769	0.103495339367769	0.0731822562881526
chrMT	A8	39001	40001	1	9	2	12.8938291120322	0.292062502611946	0.206519376127221
chrMT	B12	39001	40001	1	1	2	2.9185936448726	0.157010213272068	0.111022986520226
chrMT	B12	39001	40001	1	10	2	11.8509298056752	0.674984476051971	0.477286100211997
chrMT	B12	39001	40001	1	2	1	4.61728579668041	NA	NA
chrMT	B12	39001	40001	1	3	3	9.20378319777337	0.287839228212668	0.166184055891918
chrMT	B12	39001	40001	1	4	2	6.85097513362106	0.147008441625324	0.103950665964933
chrMT	B12	39001	40001	1	5	2	8.94143143889077	0.387988609514207	0.274349376810635
chrMT	B12	39001	40001	1	9	2	11.8183368025959	0.0765739569210685	0.0541459642011741
chrMT	FOUNDER	40001	41001	0	0	2	7.99165657946914	0.243975579186681	0.172516786486817
chrMT	A7	40001	41001	1	1	2	10.9907231918925	0.365558174638733	0.258488664205224
chrMT	A7	40001	41001	1	10	2	14.4779215142242	0.178514730322172	0.126228976352496
chrMT	A7	40001	41001	1	2	2	11.5155701676911	0.0946124629574221	0.0669011141419542
chrMT	A7	40001	41001	1	3	2	14.0359716686364	0.025418298381983	0.0179734511521232
chrMT	A7	40001	41001	1	4	2	17.1023815025655	0.321705921237655	0.227480438455011
chrMT	A7	40001	41001	1	5	2	13.0718219992117	0.284190655386813	0.200953139573865
chrMT	A7	40001	41001	1	9	2	14.1448426429638	0.0853974647334663	0.060385126409173
chrMT	A8	40001	41001	1	1	2	81.6216638333465	2.272961260006	1.60722632032456
chrMT	A8	40001	41001	1	10	2	15.5639867059344	0.479218571588815	0.338858701640982
chrMT	A8	40001	41001	1	2	2	36.2241268822463	0.499584498558541	0.353259586706425
chrMT	A8	40001	41001	1	3	3	24.8516517950914	2.17081061889271	1.2533180951774
chrMT	A8	40001	41001	1	4	2	17.4755384842083	0.291972530935235	0.206455756544504
chrMT	A8	40001	41001	1	5	2	15.8335052040962	0.377509011878853	0.26693918225857
chrMT	A8	40001	41001	1	9	2	15.4836672447577	0.0470783611082915	0.0332894283868219
chrMT	B12	40001	41001	1	1	2	4.48975727593777	0.00898568871861456	0.00635384142656381
chrMT	B12	40001	41001	1	10	2	14.3352737273849	0.111008170316279	0.0784946299977518
chrMT	B12	40001	41001	1	2	1	5.56230107021554	NA	NA
chrMT	B12	40001	41001	1	3	3	10.7120475124904	0.143747195996915	0.0829924823040728
chrMT	B12	40001	41001	1	4	2	8.01327659186626	0.303616432133578	0.214689238041318
chrMT	B12	40001	41001	1	5	2	10.648997770396	0.373754471945468	0.264284321611438
chrMT	B12	40001	41001	1	9	2	13.7354480175907	0.24191924560219	0.171062739064842
chrMT	FOUNDER	41001	42001	0	0	2	7.01237860865337	0.14156213531159	0.100099545838073
chrMT	A7	41001	42001	1	1	2	9.72885298978286	0.461567373463192	0.326377419750287
chrMT	A7	41001	42001	1	10	2	12.531451240171	0.233967386279944	0.165439925415041
chrMT	A7	41001	42001	1	2	2	10.2577209678641	0.428167868516844	0.30276040331445
chrMT	A7	41001	42001	1	3	2	12.0985591743191	0.208731789740179	0.147595663974485
chrMT	A7	41001	42001	1	4	2	15.6792555018741	0.58470340873639	0.413447745300391
chrMT	A7	41001	42001	1	5	2	12.6320271559325	0.218189325153902	0.154283151398841
chrMT	A7	41001	42001	1	9	2	12.3203667081479	0.200730476124764	0.141937880858625
chrMT	A8	41001	42001	1	1	2	52.6476121895633	0.702619758389081	0.496827195752573
chrMT	A8	41001	42001	1	10	2	13.846684787224	0.32902499728745	0.232655806761842
chrMT	A8	41001	42001	1	2	2	26.3745636832882	0.200217729707439	0.141575314389906
chrMT	A8	41001	42001	1	3	3	19.4930156955414	2.43608464491569	1.40647412551079
chrMT	A8	41001	42001	1	4	2	15.8879167082188	0.312110919701783	0.220695747803501
chrMT	A8	41001	42001	1	5	2	14.6365806521596	0.291016617391071	0.205779823595197
chrMT	A8	41001	42001	1	9	2	14.1163553641361	0.300585648780082	0.212546150579754
chrMT	B12	41001	42001	1	1	2	3.33507273640371	0.063849695743402	0.0451485528368574
chrMT	B12	41001	42001	1	10	2	12.548946570684	0.286129688296158	0.202324242893006
chrMT	B12	41001	42001	1	2	1	4.86861555550809	NA	NA
chrMT	B12	41001	42001	1	3	3	9.55727571121253	0.425046690606773	0.24540082123998
chrMT	B12	41001	42001	1	4	2	7.00630811503938	0.493355897702267	0.34885530080365
chrMT	B12	41001	42001	1	5	2	9.21812549128584	0.13009142019098	0.0919885253912307
chrMT	B12	41001	42001	1	9	2	12.0973841397372	0.101338481156458	0.0716571272208766
chrMT	FOUNDER	42001	43001	0	0	2	7.47047266946445	0.132924718641928	0.0939919699390215
chrMT	A7	42001	43001	1	1	2	9.85673526653766	0.388783094176837	0.27491116230313
chrMT	A7	42001	43001	1	10	2	13.3664259897825	0.0565420322369788	0.0399812544168361
chrMT	A7	42001	43001	1	2	2	10.727458903277	0.130369179205959	0.0921849306742581
chrMT	A7	42001	43001	1	3	2	12.1043819039422	0.294195182137287	0.208027408281687
chrMT	A7	42001	43001	1	4	2	16.367411110024	0.182414611954536	0.128986609100565
chrMT	A7	42001	43001	1	5	2	12.0703672012987	0.0109205249393144	0.00772197723870605
chrMT	A7	42001	43001	1	9	2	13.7149834937527	0.401897480254985	0.284184433630086
chrMT	A8	42001	43001	1	1	2	8.50678300665823	0.10536354446273	0.0745032767794464
chrMT	A8	42001	43001	1	10	2	15.3243191845768	0.220195358166858	0.155701630945586
chrMT	A8	42001	43001	1	2	2	10.3758589379873	0.0839437558807484	0.0593571990215453
chrMT	A8	42001	43001	1	3	3	15.1022283977567	0.270711009696816	0.156295074321052
chrMT	A8	42001	43001	1	4	2	11.9692269203667	0.0817640366782747	0.0578159047923936
chrMT	A8	42001	43001	1	5	2	12.396363663769	0.267700293209579	0.189292692654121
chrMT	A8	42001	43001	1	9	2	15.1833610880958	0.163184186863023	0.115388645113256
chrMT	B12	42001	43001	1	1	2	3.04908092520314	0.0598600378923158	0.0423274387157402
chrMT	B12	42001	43001	1	10	2	13.7621415597899	0.495672100817258	0.350493103732865
chrMT	B12	42001	43001	1	2	1	4.94743981372696	NA	NA
chrMT	B12	42001	43001	1	3	3	10.4887686778705	0.599698670203185	0.346236188674469
chrMT	B12	42001	43001	1	4	2	7.7055465299708	0.46315647008385	0.327501080746714
chrMT	B12	42001	43001	1	5	2	10.3228136640313	0.0480417000395567	0.0339706118777006
chrMT	B12	42001	43001	1	9	2	13.1806643936435	0.283210805941178	0.200260281386314
chrMT	FOUNDER	43001	44001	0	0	2	8.19549877479685	0.16288517091792	0.115177208910791
chrMT	A7	43001	44001	1	1	2	10.3931666455801	0.460315736094187	0.325492378479077
chrMT	A7	43001	44001	1	10	2	15.1974545325852	0.0963786712735451	0.0681500120192728
chrMT	A7	43001	44001	1	2	2	12.0703506868231	0.0151864730136571	0.0107384580502634
chrMT	A7	43001	44001	1	3	2	13.3517754378786	0.199326834895387	0.14094535662698
chrMT	A7	43001	44001	1	4	2	17.5233193830587	0.0940754493229556	0.0665213881594333
chrMT	A7	43001	44001	1	5	2	13.3933932662951	0.208960154138407	0.147757141989054
chrMT	A7	43001	44001	1	9	2	14.8946947298393	0.308994859392193	0.218492360428003
chrMT	A8	43001	44001	1	1	2	8.8276413673121	0.021254158776522	0.0150289597992943
chrMT	A8	43001	44001	1	10	2	17.3455008394451	0.74621720517431	0.527655246016828
chrMT	A8	43001	44001	1	2	2	11.6094052479936	0.12566918751605	0.0888615346788031
chrMT	A8	43001	44001	1	3	3	16.6406121580596	0.408643771450094	0.235930591449375
chrMT	A8	43001	44001	1	4	2	12.9122215872671	0.150434298017068	0.106373112250907
chrMT	A8	43001	44001	1	5	2	13.2158532959372	0.54073078787547	0.382354406903089
chrMT	A8	43001	44001	1	9	2	16.2800213610225	0.119191375803119	0.0842810300893397
chrMT	B12	43001	44001	1	1	2	3.13404013003257	0.0718460018758327	0.0508027951275427
chrMT	B12	43001	44001	1	10	2	14.7274517196769	0.0420339675926215	0.0297225035249182
chrMT	B12	43001	44001	1	2	1	5.33212996389892	NA	NA
chrMT	B12	43001	44001	1	3	3	11.3038362892396	0.472564517282056	0.27283525126226
chrMT	B12	43001	44001	1	4	2	8.36786312609565	0.444538323982162	0.314336063385089
chrMT	B12	43001	44001	1	5	2	11.0878630915484	0.400848526603482	0.283442711389958
chrMT	B12	43001	44001	1	9	2	14.7190327030876	0.220412382826763	0.155855090554289
chrMT	FOUNDER	44001	45001	0	0	2	8.1613445333846	0.146450131936708	0.103555881398111
chrMT	A7	44001	45001	1	1	2	10.6713244925148	0.530328331721757	0.374998759615803
chrMT	A7	44001	45001	1	10	2	15.3084566715886	0.041275140497791	0.0291859317404155
chrMT	A7	44001	45001	1	2	2	11.9477356602995	0.0919281637262388	0.0650030279528506
chrMT	A7	44001	45001	1	3	2	13.4275448460416	0.286864768574173	0.202844023142307
chrMT	A7	44001	45001	1	4	2	17.7045940680229	0.0372568534147567	0.0263445736952477
chrMT	A7	44001	45001	1	5	2	13.1241025792051	0.11028127147328	0.0779806348966305
chrMT	A7	44001	45001	1	9	2	14.899878699484	0.0196291646164216	0.0138799154092988
chrMT	A8	44001	45001	1	1	2	9.36407215238069	0.157418608220059	0.111311765357352
chrMT	A8	44001	45001	1	10	2	17.0226813506971	0.289963120963671	0.205034889127427
chrMT	A8	44001	45001	1	2	2	11.5669998100912	0.115215978458383	0.0814699996689656
chrMT	A8	44001	45001	1	3	3	16.5111402180545	0.417845597523576	0.241243268209937
chrMT	A8	44001	45001	1	4	2	12.9049352845191	0.259668195402257	0.18361314182741
chrMT	A8	44001	45001	1	5	2	13.2778625644632	0.331626977078773	0.234495684316796
chrMT	A8	44001	45001	1	9	2	16.9155668226325	0.326934703567474	0.231177745897774
chrMT	B12	44001	45001	1	1	2	3.08232266352538	0.171680232175559	0.121396256367019
chrMT	B12	44001	45001	1	10	2	14.6820746763835	0.52011294299209	0.367775388972599
chrMT	B12	44001	45001	1	2	1	5.1916561638861	NA	NA
chrMT	B12	44001	45001	1	3	3	11.1656469795576	0.591404633708828	0.341447624471784
chrMT	B12	44001	45001	1	4	2	8.4020491023292	0.617442525815806	0.436597796997307
chrMT	B12	44001	45001	1	5	2	11.3714122943218	0.124893665861325	0.0883131580577894
chrMT	B12	44001	45001	1	9	2	14.2656962416025	0.190552317987846	0.134740836220021
chrMT	FOUNDER	45001	46001	0	0	2	7.14860192619987	0.138364943415214	0.0978387897673909
chrMT	A7	45001	46001	1	1	2	11.5266177358972	0.347572441530402	0.245770830359712
chrMT	A7	45001	46001	1	10	2	13.8035176380501	0.430130050247129	0.304147875321855
chrMT	A7	45001	46001	1	2	2	12.3173524773619	0.0171909240879177	0.0121558189974298
chrMT	A7	45001	46001	1	3	2	12.3195770918587	0.182548857687455	0.129081535168657
chrMT	A7	45001	46001	1	4	2	16.8212226951401	0.70206957241836	0.496438155521762
chrMT	A7	45001	46001	1	5	2	12.0494810235639	0.0246225220605417	0.0174107523189244
chrMT	A7	45001	46001	1	9	2	13.5816785190565	0.400740077431786	0.283366026245238
chrMT	A8	45001	46001	1	1	2	8.1295192130414	0.064387962450458	0.0455291648755036
chrMT	A8	45001	46001	1	10	2	15.2369445646617	0.179268094722863	0.126761685428929
chrMT	A8	45001	46001	1	2	2	10.2333833069051	0.0572229574717663	0.0404627412678353
chrMT	A8	45001	46001	1	3	3	14.5544666470782	0.255485273521522	0.147504491441636
chrMT	A8	45001	46001	1	4	2	11.6481494449776	0.0251526918997431	0.0177856390074043
chrMT	A8	45001	46001	1	5	2	12.0358260295486	0.459567661329792	0.324963409740339
chrMT	A8	45001	46001	1	9	2	14.8405498686753	0.221527820411009	0.1566438240341
chrMT	B12	45001	46001	1	1	2	2.86353535491473	0.0596463355173526	0.042176328317248
chrMT	B12	45001	46001	1	10	2	13.2092178403019	0.332990895932055	0.23546012058694
chrMT	B12	45001	46001	1	2	1	4.64801444043321	NA	NA
chrMT	B12	45001	46001	1	3	3	9.91785316347919	0.460035569412314	0.265601659837002
chrMT	B12	45001	46001	1	4	2	7.22288740570824	0.515540603856786	0.364542256964141
chrMT	B12	45001	46001	1	5	2	10.1753702293758	0.206139393738064	0.145762563181869
chrMT	B12	45001	46001	1	9	2	12.4344194208807	0.0589088192816689	0.0416548255857609
chrMT	FOUNDER	46001	47001	0	0	2	6.53123796215418	0.313454277166268	0.221645644976196
chrMT	A7	46001	47001	1	1	2	11.5319470793976	0.799476362855533	0.565315157573504
chrMT	A7	46001	47001	1	10	2	12.2867556494361	0.202126468782801	0.142924996733609
chrMT	A7	46001	47001	1	2	2	11.6836580080385	0.164983720819947	0.116661107777173
chrMT	A7	46001	47001	1	3	2	10.8802587087363	0.0970512967987095	0.0686256300893158
chrMT	A7	46001	47001	1	4	2	15.3595567845735	0.603182443428978	0.426514396041301
chrMT	A7	46001	47001	1	5	2	11.4305193596037	0.328178421198086	0.232057187068261
chrMT	A7	46001	47001	1	9	2	12.5054157407557	0.0245643257578088	0.017369601318622
chrMT	A8	46001	47001	1	1	2	8.07967860251663	0.274845761682162	0.194345301865839
chrMT	A8	46001	47001	1	10	2	13.0629140053626	0.343311973465787	0.242758224500194
chrMT	A8	46001	47001	1	2	2	9.51646724174195	0.0622912164661026	0.0440465415715403
chrMT	A8	46001	47001	1	3	3	12.9056127742388	0.302699441269513	0.174763603900503
chrMT	A8	46001	47001	1	4	2	10.2692359204528	0.175685127613443	0.12422814508909
chrMT	A8	46001	47001	1	5	2	10.7665811758986	0.0658979115497847	0.0465968601228841
chrMT	A8	46001	47001	1	9	2	12.6282062155051	0.0499075079783174	0.03528993732359
chrMT	B12	46001	47001	1	1	2	3.01634862411837	0.111625194857401	0.0789309322349376
chrMT	B12	46001	47001	1	10	2	11.73332574089	0.657787802810852	0.465126215949353
chrMT	B12	46001	47001	1	2	1	4.38095187234315	NA	NA
chrMT	B12	46001	47001	1	3	3	9.03850194330623	0.582023902118928	0.33603165656316
chrMT	B12	46001	47001	1	4	2	6.79499331509528	0.52828495328888	0.373553872869385
chrMT	B12	46001	47001	1	5	2	9.00916346380196	0.352246375897825	0.249075801045738
chrMT	B12	46001	47001	1	9	2	11.4324836217276	0.251477951910244	0.177821765114638
chrMT	FOUNDER	47001	48001	0	0	2	7.40240586795584	0.0798389604222936	0.0564546703174882
chrMT	A7	47001	48001	1	1	2	19.2905012753921	0.543941967644951	0.384625053893698
chrMT	A7	47001	48001	1	10	2	16.0505204736893	0.277069079895051	0.195917425250908
chrMT	A7	47001	48001	1	2	2	16.3270520918303	0.252484519181208	0.178533515657657
chrMT	A7	47001	48001	1	3	2	14.9815599675583	0.317774226422549	0.224700310389694
chrMT	A7	47001	48001	1	4	2	19.4899776609148	0.881307269921169	0.623178346870262
chrMT	A7	47001	48001	1	5	2	15.4363431155515	0.538796245229533	0.380986478679652
chrMT	A7	47001	48001	1	9	2	16.2745246902107	0.0529652855972534	0.0374521126133001
chrMT	A8	47001	48001	1	1	2	10.0272230306788	0.185281185588894	0.13101358275619
chrMT	A8	47001	48001	1	10	2	14.6366516175221	0.128075167625428	0.090562819529544
chrMT	A8	47001	48001	1	2	2	11.1996529291618	0.0776315475545615	0.0548937937098364
chrMT	A8	47001	48001	1	3	3	15.1184178667255	0.280915814123199	0.162186820903652
chrMT	A8	47001	48001	1	4	2	12.0114485875324	0.225271190277029	0.159290786250852
chrMT	A8	47001	48001	1	5	2	12.4456790296159	0.00162479397119542	0.0011489028350633
chrMT	A8	47001	48001	1	9	2	14.6217914982544	0.166655157124216	0.117842991722243
chrMT	B12	47001	48001	1	1	2	4.75008796001373	0.201046888280631	0.142161618039688
chrMT	B12	47001	48001	1	10	2	13.4564241806123	0.283711328617994	0.200614204365229
chrMT	B12	47001	48001	1	2	1	5.6866468715955	NA	NA
chrMT	B12	47001	48001	1	3	3	10.4125373979812	0.663483535561197	0.383062397859142
chrMT	B12	47001	48001	1	4	2	7.98825438328722	0.462802013264824	0.327250441926343
chrMT	B12	47001	48001	1	5	2	10.561863602668	0.0286514059147799	0.0202596034128693
chrMT	B12	47001	48001	1	9	2	12.8907972224097	0.0467945717309591	0.0330887589936815
chrMT	FOUNDER	48001	49001	0	0	2	8.15451463851902	0.0923202926499888	0.0652803049739337
chrMT	A7	48001	49001	1	1	2	16.0273206939764	0.0669450325454157	0.0473372864796175
chrMT	A7	48001	49001	1	10	2	15.4909184089774	0.140939521960377	0.0996592917153727
chrMT	A7	48001	49001	1	2	2	15.4844988003837	0.00774097876611512	0.00547369857854107
chrMT	A7	48001	49001	1	3	2	13.0782371954829	0.296490074290421	0.20965014208526
chrMT	A7	48001	49001	1	4	2	19.0676278733457	0.0506035551243105	0.0357821169805472
chrMT	A7	48001	49001	1	5	2	15.2076420240406	0.0812503783759789	0.0574526935236275
chrMT	A7	48001	49001	1	9	2	15.9825745852873	0.0437680655311154	0.0309486959364689
chrMT	A8	48001	49001	1	1	2	11.2415423594102	0.228809672599667	0.161792871096298
chrMT	A8	48001	49001	1	10	2	15.4029669861651	0.193656220771296	0.136935626926342
chrMT	A8	48001	49001	1	2	2	11.8425619955495	0.00282472670135668	0.00199738340552802
chrMT	A8	48001	49001	1	3	3	16.2034578865934	0.029891375344134	0.0172577936013839
chrMT	A8	48001	49001	1	4	2	12.4388679973596	0.0207193152115087	0.0146507682875994
chrMT	A8	48001	49001	1	5	2	13.6039923695356	0.0437046924064191	0.0309038843702512
chrMT	A8	48001	49001	1	9	2	15.1696081942988	0.226120566453842	0.159891385905255
chrMT	B12	48001	49001	1	1	2	6.19130249995297	0.12255539101484	0.0866597480575621
chrMT	B12	48001	49001	1	10	2	14.7570129682798	0.567346402472112	0.401174488469823
chrMT	B12	48001	49001	1	2	1	7.11110161707218	NA	NA
chrMT	B12	48001	49001	1	3	3	11.0292347824176	0.470179389155341	0.27145819689625
chrMT	B12	48001	49001	1	4	2	9.04149072807367	0.226483195922993	0.16014780366195
chrMT	B12	48001	49001	1	5	2	10.9001307076967	0.15981232928766	0.113004381756522
chrMT	B12	48001	49001	1	9	2	14.6303975116895	0.0705049349360798	0.0498545176004184
chrMT	FOUNDER	49001	50001	0	0	2	7.35202965751228	0.143485822917257	0.101459798388924
chrMT	A7	49001	50001	1	1	2	17.0349436874419	1.06860976584593	0.755621211871825
chrMT	A7	49001	50001	1	10	2	15.8221538019114	0.186726410768722	0.132035511281188
chrMT	A7	49001	50001	1	2	2	16.6287087888903	0.310223229965834	0.219360949590435
chrMT	A7	49001	50001	1	3	2	13.3215827271993	0.180784076720221	0.127833646579417
chrMT	A7	49001	50001	1	4	2	19.52845833655	0.613421785852011	0.433754704503519
chrMT	A7	49001	50001	1	5	2	15.0463306874374	0.102671605290155	0.0725997883359772
chrMT	A7	49001	50001	1	9	2	15.6447741568793	0.192065497034394	0.135810815384985
chrMT	A8	49001	50001	1	1	2	11.5484704174037	0.333939949546423	0.236131202833369
chrMT	A8	49001	50001	1	10	2	15.1408665110133	0.253676798646	0.179376584552281
chrMT	A8	49001	50001	1	2	2	11.9338578163925	0.339522446321223	0.240078624158782
chrMT	A8	49001	50001	1	3	3	15.5732126081201	0.0514298706583561	0.0296930496689895
chrMT	A8	49001	50001	1	4	2	12.4029529525977	0.105985257458838	0.0749428942549466
chrMT	A8	49001	50001	1	5	2	12.7423862419146	0.150238770428404	0.106234853367053
chrMT	A8	49001	50001	1	9	2	15.4644301392242	0.0157904110723179	0.0111655067469592
chrMT	B12	49001	50001	1	1	2	7.18710068598023	0.0225653083851746	0.0159560825787226
chrMT	B12	49001	50001	1	10	2	14.4477474169197	0.0157825476967551	0.0111599465007757
chrMT	B12	49001	50001	1	2	1	7.14720270010467	NA	NA
chrMT	B12	49001	50001	1	3	3	10.9324654369329	0.338287680821059	0.195310483585573
chrMT	B12	49001	50001	1	4	2	8.65364969670143	0.377714018648143	0.267084143935324
chrMT	B12	49001	50001	1	5	2	11.3047574821114	0.301123470233929	0.212926447776836
chrMT	B12	49001	50001	1	9	2	14.0446367743163	0.145067152813744	0.102577967482024
chrMT	FOUNDER	50001	51001	0	0	2	6.73797204360912	0.0546232862690627	0.0386244961315483
chrMT	A7	50001	51001	1	1	2	16.3985101484751	0.633506019833555	0.447956402546806
chrMT	A7	50001	51001	1	10	2	14.0833346607762	0.247732799419838	0.175173542392094
chrMT	A7	50001	51001	1	2	2	14.7961511426267	0.307299010286643	0.2172932140256
chrMT	A7	50001	51001	1	3	2	11.9914026034135	0.118020509035827	0.0834531022583214
chrMT	A7	50001	51001	1	4	2	17.5018734140879	0.692095620170656	0.48938550625218
chrMT	A7	50001	51001	1	5	2	13.7920945003494	0.0209248890038797	0.0147961309102191
chrMT	A7	50001	51001	1	9	2	14.5891916748775	0.0432539854032979	0.0305851863920159
chrMT	A8	50001	51001	1	1	2	12.2680733669268	0.0508898799699353	0.0359845792205107
chrMT	A8	50001	51001	1	10	2	13.3315513125376	0.152248873368541	0.107656210786907
chrMT	A8	50001	51001	1	2	2	11.1227217519125	0.517556468484671	0.365967688512472
chrMT	A8	50001	51001	1	3	3	14.0483354357041	0.104477106758824	0.0603198857113604
chrMT	A8	50001	51001	1	4	2	10.8171194254776	0.27497915768728	0.19443962708564
chrMT	A8	50001	51001	1	5	2	11.6331275515011	0.0965530043008405	0.0682732840850582
chrMT	A8	50001	51001	1	9	2	13.6858469903978	0.338295162477795	0.239210803430653
chrMT	B12	50001	51001	1	1	2	10.3351351261385	0.0392287750474395	0.0277389328536861
chrMT	B12	50001	51001	1	10	2	13.1152422159364	0.570136243614395	0.403147204059964
chrMT	B12	50001	51001	1	2	1	8.9586012432444	NA	NA
chrMT	B12	50001	51001	1	3	3	10.3983304962792	0.393621981673102	0.227257757077919
chrMT	B12	50001	51001	1	4	2	8.43014932365155	0.138273643489834	0.0977742309710328
chrMT	B12	50001	51001	1	5	2	10.3793997551388	0.0257258902715591	0.0181909514630805
chrMT	B12	50001	51001	1	9	2	12.5304502079785	0.655534480611668	0.463532876542112
chrMT	FOUNDER	51001	52001	0	0	2	5.50386438396229	0.210481375828322	0.148832808161681
chrMT	A7	51001	52001	1	1	2	17.9624216073011	0.8626768762799	0.610004669190346
chrMT	A7	51001	52001	1	10	2	12.3360097912177	0.517821649572759	0.366155199858102
chrMT	A7	51001	52001	1	2	2	15.6193025983993	0.0840625157786213	0.0594411749506643
chrMT	A7	51001	52001	1	3	2	10.9804104765876	0.0628390855193164	0.04443394349427
chrMT	A7	51001	52001	1	4	2	15.8050757088362	0.260759649568432	0.184384916469666
chrMT	A7	51001	52001	1	5	2	13.0961730318248	0.250432966262005	0.177082848676526
chrMT	A7	51001	52001	1	9	2	13.2002800204986	0.38325310159066	0.271000867045532
chrMT	A8	51001	52001	1	1	2	14.1217209393228	0.182226938828419	0.128853904160441
chrMT	A8	51001	52001	1	10	2	11.0490753482578	0.422428209230014	0.298701851311033
chrMT	A8	51001	52001	1	2	2	10.2350618861982	0.260411291385008	0.184138590035885
chrMT	A8	51001	52001	1	3	3	12.1600512870781	0.26248873012302	0.151547938995769
chrMT	A8	51001	52001	1	4	2	9.5025160837424	0.0100970673138322	0.00713970476770776
chrMT	A8	51001	52001	1	5	2	10.1522876786041	0.203278741193615	0.14373977636907
chrMT	A8	51001	52001	1	9	2	11.2143795712987	0.319080675093714	0.225624109104347
chrMT	B12	51001	52001	1	1	2	16.4681637877434	0.0591664530400293	0.0418370001633601
chrMT	B12	51001	52001	1	10	2	11.1293490024883	0.786450309489637	0.556104346906381
chrMT	B12	51001	52001	1	2	1	12.5736654348151	NA	NA
chrMT	B12	51001	52001	1	3	3	8.99944730747771	0.44806333358414	0.258689486258804
chrMT	B12	51001	52001	1	4	2	8.71530156417115	0.0034172333274754	0.00241634885875452
chrMT	B12	51001	52001	1	5	2	11.077863165098	0.290768554619668	0.205604416727378
chrMT	B12	51001	52001	1	9	2	11.0271952747023	0.0996340102603267	0.0704518842918871
chrMT	FOUNDER	52001	53001	0	0	2	7.4979075788883	0.0655024489896166	0.0463172258648838
chrMT	A7	52001	53001	1	1	2	26.6259589108302	1.68884455684834	1.19419343851745
chrMT	A7	52001	53001	1	10	2	17.7080670505032	0.037715099734685	0.0266686027755227
chrMT	A7	52001	53001	1	2	2	24.155207057639	0.450813625245129	0.318773371462122
chrMT	A7	52001	53001	1	3	2	14.9966879554633	0.166110308238265	0.117457725380265
chrMT	A7	52001	53001	1	4	2	21.8990398246077	0.298315216943839	0.210940712832125
chrMT	A7	52001	53001	1	5	2	18.1896332843428	0.726405225630657	0.513646060932782
chrMT	A7	52001	53001	1	9	2	18.2390183274341	0.357031269585577	0.252459231819604
chrMT	A8	52001	53001	1	1	2	21.7576279548906	0.398078728044221	0.281484168046184
chrMT	A8	52001	53001	1	10	2	15.6260637409199	0.290578343332597	0.205469917036432
chrMT	A8	52001	53001	1	2	2	15.6382942355084	0.0968358429453506	0.0684732812085729
chrMT	A8	52001	53001	1	3	3	17.8037897270301	0.615596617334741	0.355414872730436
chrMT	A8	52001	53001	1	4	2	13.0468870063696	0.474867747314805	0.335782204293078
chrMT	A8	52001	53001	1	5	2	13.1243415905393	0.0661289460952917	0.0467602262167004
chrMT	A8	52001	53001	1	9	2	15.5479157280491	0.160674048739348	0.113613709424291
chrMT	B12	52001	53001	1	1	2	28.3551239038837	0.118537896389786	0.0838189503648064
chrMT	B12	52001	53001	1	10	2	15.9883888943713	0.308962748313274	0.218469654466348
chrMT	B12	52001	53001	1	2	1	20.2420054258432	NA	NA
chrMT	B12	52001	53001	1	3	3	13.3224900723345	0.846834260936925	0.488919988510931
chrMT	B12	52001	53001	1	4	2	13.0775641846922	0.734634283013033	0.519464883210633
chrMT	B12	52001	53001	1	5	2	17.2374809446644	0.105686847382081	0.0747318864660969
chrMT	B12	52001	53001	1	9	2	15.8129218339856	0.221981353034322	0.156964520027534
chrMT	FOUNDER	53001	54001	0	0	2	7.91199356019779	0.170183338185744	0.120337792476103
chrMT	A7	53001	54001	1	1	2	26.9349155907376	0.938683498191444	0.66374946695908
chrMT	A7	53001	54001	1	10	2	18.469445329337	0.234153689746895	0.165571661859881
chrMT	A7	53001	54001	1	2	2	24.3264910689599	0.215715697973265	0.152534032845285
chrMT	A7	53001	54001	1	3	2	15.8115398129251	0.46062220214149	0.325709082699328
chrMT	A7	53001	54001	1	4	2	23.3284939057957	0.609125349815932	0.430716665447473
chrMT	A7	53001	54001	1	5	2	19.7131488313337	0.0268427438407931	0.0189806861954782
chrMT	A7	53001	54001	1	9	2	19.2126193925278	0.450431948527364	0.318503485266769
chrMT	A8	53001	54001	1	1	2	21.9969611787133	0.0770941910335404	0.0545138252699075
chrMT	A8	53001	54001	1	10	2	16.053127417288	0.0757078722968946	0.0535335498903393
chrMT	A8	53001	54001	1	2	2	16.5840243835072	0.155491966055685	0.109949423618003
chrMT	A8	53001	54001	1	3	3	18.5053782280057	0.29734035696663	0.171669535135623
chrMT	A8	53001	54001	1	4	2	13.6332480927459	0.0398857452055636	0.0282034809075329
chrMT	A8	53001	54001	1	5	2	13.74871331173	0.315798722414355	0.223303418109238
chrMT	A8	53001	54001	1	9	2	16.0881643887008	0.353970120533144	0.250294672566405
chrMT	B12	53001	54001	1	1	2	30.7921832571679	0.17027713390264	0.120404116063566
chrMT	B12	53001	54001	1	10	2	16.5817403455558	0.595302232976677	0.420942245793302
chrMT	B12	53001	54001	1	2	1	21.7011941127465	NA	NA
chrMT	B12	53001	54001	1	3	3	13.8033634691162	0.649937129725472	0.375241376803334
chrMT	B12	53001	54001	1	4	2	13.9182358772148	0.658058431250522	0.465317579154226
chrMT	B12	53001	54001	1	5	2	17.9770910603776	0.180626229425097	0.127722031686643
chrMT	B12	53001	54001	1	9	2	16.5113487355059	0.115029232688505	0.0813379504687273
chrMT	FOUNDER	54001	55001	0	0	2	7.2142320357708	0.244938157988826	0.173197432485241
chrMT	A7	54001	55001	1	1	2	25.3732679060354	1.8771784703829	1.32736562590514
chrMT	A7	54001	55001	1	10	2	17.6448107245825	0.619806916277023	0.438269673525806
chrMT	A7	54001	55001	1	2	2	23.1427013346753	0.63564099566357	0.449466058433879
chrMT	A7	54001	55001	1	3	2	14.9955016016441	0.0568188367360217	0.0401769847551723
chrMT	A7	54001	55001	1	4	2	21.6918448603195	0.127413280086361	0.0900947943622867
chrMT	A7	54001	55001	1	5	2	18.1493386706995	0.414689650010873	0.293229863610565
chrMT	A7	54001	55001	1	9	2	18.3438555246474	0.119656996080123	0.0846102733446674
chrMT	A8	54001	55001	1	1	2	19.7309282769265	0.541392678869685	0.382822434513505
chrMT	A8	54001	55001	1	10	2	14.8678275397012	0.470638041155486	0.332791350385397
chrMT	A8	54001	55001	1	2	2	15.1623113310367	0.465817186545284	0.329382491399409
chrMT	A8	54001	55001	1	3	3	17.1619119912833	0.31569027908825	0.182263867612149
chrMT	A8	54001	55001	1	4	2	12.255164062373	0.0803252699439238	0.0567985430779885
chrMT	A8	54001	55001	1	5	2	12.2712180407189	0.0708842856411021	0.0501227590563875
chrMT	A8	54001	55001	1	9	2	15.1781554572593	0.037053552480896	0.0262008182262932
chrMT	B12	54001	55001	1	1	2	26.0976688396658	0.224512236578892	0.158754124944293
chrMT	B12	54001	55001	1	10	2	14.9246486114393	0.504242936214631	0.356553599562782
chrMT	B12	54001	55001	1	2	1	18.5857026894239	NA	NA
chrMT	B12	54001	55001	1	3	3	12.3173546601885	0.634067270503932	0.366078909309776
chrMT	B12	54001	55001	1	4	2	12.5362981027052	1.09699626872038	0.775693500548523
chrMT	B12	54001	55001	1	5	2	16.6264100930855	0.918329629924733	0.649357108684311
chrMT	B12	54001	55001	1	9	2	14.6009917731391	0.128728027508487	0.0910244611800195
chrMT	FOUNDER	55001	56001	0	0	2	7.18558000322374	0.07323441946953	0.0517845546231648
chrMT	A7	55001	56001	1	1	2	28.7679855659471	1.46595244461081	1.0365849144813
chrMT	A7	55001	56001	1	10	2	19.5497133982865	0.476326419679169	0.33681364141345
chrMT	A7	55001	56001	1	2	2	26.7376935316675	0.0885959991600123	0.0626468317920423
chrMT	A7	55001	56001	1	3	2	16.2587109277637	0.0233430740293782	0.0165060459399129
chrMT	A7	55001	56001	1	4	2	23.4395702841828	0.77056402764622	0.54487104928706
chrMT	A7	55001	56001	1	5	2	23.4843443080812	0.0505005355870092	0.0357092711671267
chrMT	A7	55001	56001	1	9	2	19.913071344644	0.358174384093856	0.253267535840081
chrMT	A8	55001	56001	1	1	2	25.3934377801208	0.171838763532152	0.121508354964297
chrMT	A8	55001	56001	1	10	2	15.5790694964005	0.0943339972249623	0.0667042091342038
chrMT	A8	55001	56001	1	2	2	17.623104365253	0.109255615225638	0.0772553864087566
chrMT	A8	55001	56001	1	3	3	18.4091201268106	0.380628142277678	0.219755760405165
chrMT	A8	55001	56001	1	4	2	13.591611964872	0.1707417732764	0.120732665715559
chrMT	A8	55001	56001	1	5	2	12.9050094984508	0.170694953577189	0.120699559188753
chrMT	A8	55001	56001	1	9	2	15.9336494102993	0.207576706242292	0.146778896600293
chrMT	B12	55001	56001	1	1	2	27.221814221981	0.519275204808746	0.367183018622297
chrMT	B12	55001	56001	1	10	2	15.4134850302478	0.232230655216385	0.164211871102901
chrMT	B12	55001	56001	1	2	1	19.4234614316536	NA	NA
chrMT	B12	55001	56001	1	3	3	12.5349569220196	0.641143481051115	0.370164361374035
chrMT	B12	55001	56001	1	4	2	12.8786074273327	0.677198955739757	0.478851973816031
chrMT	B12	55001	56001	1	5	2	17.6081865980181	0.496449083003455	0.351042513105586
chrMT	B12	55001	56001	1	9	2	15.2540888122537	0.218512540607539	0.154511699237892
chrMT	FOUNDER	56001	57001	0	0	2	8.02167786127145	0.238130779083846	0.168383888699423
chrMT	A7	56001	57001	1	1	2	35.6155009965574	1.85982813735128	1.31509708776264
chrMT	A7	56001	57001	1	10	2	22.7241492771242	0.11648319712033	0.0823660585780743
chrMT	A7	56001	57001	1	2	2	31.0093596694335	0.621332993099924	0.43934877279589
chrMT	A7	56001	57001	1	3	2	17.6923048874006	0.339943803621249	0.240376568762933
chrMT	A7	56001	57001	1	4	2	25.4048844289796	0.428805551333851	0.303211313158602
chrMT	A7	56001	57001	1	5	2	28.4227563504371	0.152321823392125	0.107707794243272
chrMT	A7	56001	57001	1	9	2	22.5089299472984	0.0606492329129655	0.0428854838665202
chrMT	A8	56001	57001	1	1	2	32.0871640035801	0.329613301927152	0.233071800961978
chrMT	A8	56001	57001	1	10	2	16.1203061126526	0.541502160204431	0.382899849507718
chrMT	A8	56001	57001	1	2	2	20.2102121897662	0.0946383452579987	0.0669194156922046
chrMT	A8	56001	57001	1	3	3	19.1934870684628	0.455506731567346	0.262986934088094
chrMT	A8	56001	57001	1	4	2	14.2105771568809	0.032149590621605	0.0227331935409083
chrMT	A8	56001	57001	1	5	2	13.9675397082011	0.19111636843221	0.135139680114162
chrMT	A8	56001	57001	1	9	2	16.3105072280103	0.0595523684453802	0.0421098835634481
chrMT	B12	56001	57001	1	1	2	35.7892344606684	0.946809114351054	0.669495145246859
chrMT	B12	56001	57001	1	10	2	17.3831786526818	0.199770977361846	0.141259412776826
chrMT	B12	56001	57001	1	2	1	22.8975498259031	NA	NA
chrMT	B12	56001	57001	1	3	3	13.6974070216638	0.546056064703851	0.315265615949396
chrMT	B12	56001	57001	1	4	2	15.3170882207359	0.338975479649349	0.239691860316017
chrMT	B12	56001	57001	1	5	2	19.4824533766585	0.0740301710592504	0.0523472359683961
chrMT	B12	56001	57001	1	9	2	17.1563093751199	0.0317852675397506	0.0224755782191863
chrMT	FOUNDER	57001	58001	0	0	2	7.02612139754848	0.0442075687055787	0.0312594716114849
chrMT	A7	57001	58001	1	1	2	30.33494395473	1.53542038996132	1.08570616971374
chrMT	A7	57001	58001	1	10	2	20.3646431878011	0.0604180559257277	0.0427220170511902
chrMT	A7	57001	58001	1	2	2	24.8877922168773	0.2779128071697	0.196514030528284
chrMT	A7	57001	58001	1	3	2	14.246949185762	0.393060210130826	0.277935539998117
chrMT	A7	57001	58001	1	4	2	21.1576122442305	0.475944094813555	0.336543296908358
chrMT	A7	57001	58001	1	5	2	25.2119785339363	0.248711621461626	0.175865674095418
chrMT	A7	57001	58001	1	9	2	20.0491533793308	0.120802092458942	0.0854199787592425
chrMT	A8	57001	58001	1	1	2	31.0387305022658	1.08928291054947	0.770239332680148
chrMT	A8	57001	58001	1	10	2	13.7590628123796	0.4203495603997	0.297232024627412
chrMT	A8	57001	58001	1	2	2	17.9158922734352	0.0690985256411564	0.0488600360508542
chrMT	A8	57001	58001	1	3	3	16.5890880393218	0.0460375944612954	0.0265798175550717
chrMT	A8	57001	58001	1	4	2	12.8835624046638	0.0549565220400406	0.0388601294049407
chrMT	A8	57001	58001	1	5	2	12.3945461681948	0.072111262873281	0.0509903629776227
chrMT	A8	57001	58001	1	9	2	13.6916556989904	0.313847701469462	0.221923837968868
chrMT	B12	57001	58001	1	1	2	31.5793073901355	0.0456466989304791	0.0322770903525225
chrMT	B12	57001	58001	1	10	2	19.5515978807865	0.547810262044594	0.387360351095312
chrMT	B12	57001	58001	1	2	1	20.0197274261423	NA	NA
chrMT	B12	57001	58001	1	3	3	11.8580467636966	0.375947536374159	0.217053411326797
chrMT	B12	57001	58001	1	4	2	15.2440649905429	0.0539183655141009	0.0381260418855156
chrMT	B12	57001	58001	1	5	2	20.5233528985945	0.0514767839927587	0.0363995830349548
chrMT	B12	57001	58001	1	9	2	21.6546665225754	0.0826227499357589	0.0584231067598555
chrMT	FOUNDER	58001	59001	0	0	2	6.79297798786879	0.0789194653556697	0.0558044891206109
chrMT	A7	58001	59001	1	1	2	25.5698439336762	1.1042939007781	0.780853705663141
chrMT	A7	58001	59001	1	10	2	17.6088013364832	0.037659220746275	0.0266290903638922
chrMT	A7	58001	59001	1	2	2	21.9261158832225	0.285371103644561	0.201787842541758
chrMT	A7	58001	59001	1	3	2	13.9391437423192	0.224393375814477	0.158670077691758
chrMT	A7	58001	59001	1	4	2	20.1004845441458	0.673447198917833	0.476199081125886
chrMT	A7	58001	59001	1	5	2	22.8318054879176	0.300103573018738	0.212205271539862
chrMT	A7	58001	59001	1	9	2	18.2227082742376	0.0322491271479005	0.0228035764936276
chrMT	A8	58001	59001	1	1	2	24.735256522858	0.237338125837336	0.167823398213686
chrMT	A8	58001	59001	1	10	2	14.2024312891868	0.0403851711340851	0.0285566283682908
chrMT	A8	58001	59001	1	2	2	15.9962207890726	0.166902871479175	0.118018152222431
chrMT	A8	58001	59001	1	3	3	16.3893460055118	0.41261282957435	0.238222128225844
chrMT	A8	58001	59001	1	4	2	12.9367432294574	0.19236889685572	0.136025351456055
chrMT	A8	58001	59001	1	5	2	12.4328984530314	0.190014764883744	0.134360728774863
chrMT	A8	58001	59001	1	9	2	14.0623178648443	0.397500411788862	0.281075236700349
chrMT	B12	58001	59001	1	1	2	27.0925586093593	0.504123932709186	0.356469451377096
chrMT	B12	58001	59001	1	10	2	14.2322113057444	0.376795401688982	0.266434583654188
chrMT	B12	58001	59001	1	2	1	17.8311366500758	NA	NA
chrMT	B12	58001	59001	1	3	3	11.5352292352528	0.56565040906525	0.326578415941044
chrMT	B12	58001	59001	1	4	2	11.741573847688	0.424905579558183	0.300453616669591
chrMT	B12	58001	59001	1	5	2	14.9680008520846	0.606338387524805	0.428745985512506
chrMT	B12	58001	59001	1	9	2	13.8929592607999	0.0440723194224102	0.0311638359262059
chrMT	FOUNDER	59001	60001	0	0	2	7.33317889669245	0.105892922300494	0.0748776034383396
chrMT	A7	59001	60001	1	1	2	25.3144384734799	1.90757882986948	1.34886192624861
chrMT	A7	59001	60001	1	10	2	16.6507428985548	0.25809590022302	0.182501361244144
chrMT	A7	59001	60001	1	2	2	22.5874688524789	0.38246212056171	0.270441558996172
chrMT	A7	59001	60001	1	3	2	15.4609758577735	0.256412825414673	0.181311247633918
chrMT	A7	59001	60001	1	4	2	22.0614035849548	0.922512259710113	0.652314674568746
chrMT	A7	59001	60001	1	5	2	23.6515745791813	0.154230670407619	0.109057552912175
chrMT	A7	59001	60001	1	9	2	17.6794469115471	0.211518786094323	0.149566367995643
chrMT	A8	59001	60001	1	1	2	20.0519709735359	0.162761734660659	0.115089926296237
chrMT	A8	59001	60001	1	10	2	16.2217362816509	0.193637402476741	0.136922320382652
chrMT	A8	59001	60001	1	2	2	15.4594011225183	0.292187590228155	0.206607826428884
chrMT	A8	59001	60001	1	3	3	17.3283860731543	0.639449134913099	0.369186130175151
chrMT	A8	59001	60001	1	4	2	13.7182384095006	0.0191939928357241	0.0135722024921865
chrMT	A8	59001	60001	1	5	2	13.2166709398801	0.370965470220301	0.262312199578831
chrMT	A8	59001	60001	1	9	2	15.9971857471493	0.220779298665605	0.15611453923206
chrMT	B12	59001	60001	1	1	2	25.4761408176849	0.014791456992524	0.0104591395430429
chrMT	B12	59001	60001	1	10	2	15.2972969006283	0.461450143051693	0.326294525331354
chrMT	B12	59001	60001	1	2	1	17.5434601499583	NA	NA
chrMT	B12	59001	60001	1	3	3	12.3616533413178	0.730049210480589	0.421494108192642
chrMT	B12	59001	60001	1	4	2	12.4661508902627	0.503626877898475	0.356117980549821
chrMT	B12	59001	60001	1	5	2	16.1382535802878	0.547204755276649	0.386932193153644
chrMT	B12	59001	60001	1	9	2	15.3987048500113	0.32439197641468	0.229379766285327
chrMT	FOUNDER	60001	61001	0	0	2	7.14081422375547	0.120955630907746	0.0855285468375642
chrMT	A7	60001	61001	1	1	2	21.9128113080587	0.487581549610225	0.344772220110835
chrMT	A7	60001	61001	1	10	2	15.1358979060211	0.0446378125115733	0.0315636999242672
chrMT	A7	60001	61001	1	2	2	19.8263165748627	0.00381754232297094	0.0026994100640394
chrMT	A7	60001	61001	1	3	2	13.8508118338697	0.221893888058537	0.15690267295004
chrMT	A7	60001	61001	1	4	2	19.3211652775317	0.2852393723775	0.201694694469525
chrMT	A7	60001	61001	1	5	2	20.1802242670268	0.0289059798804311	0.0204396143902947
chrMT	A7	60001	61001	1	9	2	16.0329793729483	0.107986987112918	0.0763583308674489
chrMT	A8	60001	61001	1	1	2	17.7661073683873	0.196984290873173	0.139288927863644
chrMT	A8	60001	61001	1	10	2	14.9476301312633	0.24462606141626	0.172976746882394
chrMT	A8	60001	61001	1	2	2	14.0890642497254	0.103791999945506	0.0733920269943811
chrMT	A8	60001	61001	1	3	3	16.5634005525703	0.0585783929948639	0.0338202509642804
chrMT	A8	60001	61001	1	4	2	12.4196582336048	0.00572679677837429	0.00404945683646574
chrMT	A8	60001	61001	1	5	2	12.946835884097	0.0560697229255967	0.0396472812999402
chrMT	A8	60001	61001	1	9	2	14.7413112001095	0.227098737537555	0.160583057311709
chrMT	B12	60001	61001	1	1	2	22.5968409957681	0.149134567596059	0.105454064056497
chrMT	B12	60001	61001	1	10	2	14.9209166027899	0.345652235768955	0.244413039844519
chrMT	B12	60001	61001	1	2	1	16.2827846965586	NA	NA
chrMT	B12	60001	61001	1	3	3	11.6250082589703	0.492761644818839	0.284496068282479
chrMT	B12	60001	61001	1	4	2	11.5786198381043	0.54426825434167	0.384855773429559
chrMT	B12	60001	61001	1	5	2	14.7960835774303	0.246205252604512	0.174093403680398
chrMT	B12	60001	61001	1	9	2	14.428851028116	0.0750028939324764	0.0530350549082694
chrMT	FOUNDER	61001	62001	0	0	2	6.8424746770167	0.0413010588005179	0.0292042587480306
chrMT	A7	61001	62001	1	1	2	20.9226716244365	0.682158527802619	0.482358920853464
chrMT	A7	61001	62001	1	10	2	14.908581862229	0.236154018096181	0.16698610760026
chrMT	A7	61001	62001	1	2	2	18.7364001027733	0.147394428650511	0.104223600007893
chrMT	A7	61001	62001	1	3	2	13.5865353279798	0.0516669207585369	0.0365340300313894
chrMT	A7	61001	62001	1	4	2	19.0742930444527	0.0613345589179852	0.0433700825319931
chrMT	A7	61001	62001	1	5	2	19.2055003867183	0.0549798887183915	0.0388766521416564
chrMT	A7	61001	62001	1	9	2	15.9274250969115	0.057005500603889	0.0403089760419437
chrMT	A8	61001	62001	1	1	2	16.5223039115653	0.185278857583754	0.131011936607969
chrMT	A8	61001	62001	1	10	2	14.3275695698831	0.110556346908968	0.0781751426025439
chrMT	A8	61001	62001	1	2	2	13.4356285027501	0.180548584902207	0.127667128717985
chrMT	A8	61001	62001	1	3	3	15.8422375936278	0.146109874583054	0.0843565754217885
chrMT	A8	61001	62001	1	4	2	12.2391020032878	0.0636269338382612	0.0449910363831423
chrMT	A8	61001	62001	1	5	2	12.4470436660201	0.00162084868121569	0.00114611309376489
chrMT	A8	61001	62001	1	9	2	14.4898418336037	0.182393847626041	0.12897192650308
chrMT	B12	61001	62001	1	1	2	21.5197756782914	0.0664035437911741	0.0469543961095571
chrMT	B12	61001	62001	1	10	2	14.4807879114593	0.081653905407762	0.0577380302241934
chrMT	B12	61001	62001	1	2	1	16.2000939909854	NA	NA
chrMT	B12	61001	62001	1	3	3	11.373462244726	0.452105571166587	0.261023273215159
chrMT	B12	61001	62001	1	4	2	11.2174419492823	0.212476674707343	0.150243697529531
chrMT	B12	61001	62001	1	5	2	14.7814106780538	0.477615847454727	0.337725404537397
chrMT	B12	61001	62001	1	9	2	14.3002886213868	0.175236179705126	0.123910690978719
chrMT	FOUNDER	62001	63001	0	0	2	5.32158833003295	0.0275341372002547	0.0194695751284208
chrMT	A7	62001	63001	1	1	2	12.2199530717627	0.831306945772328	0.587822778603091
chrMT	A7	62001	63001	1	10	2	10.9780591410361	0.397556069564888	0.281114592691203
chrMT	A7	62001	63001	1	2	2	10.8855063618579	0.0382701654654873	0.0270610935177773
chrMT	A7	62001	63001	1	3	2	9.95275718393124	0.136717257511592	0.0966736998916744
chrMT	A7	62001	63001	1	4	2	14.2256427984789	0.77081967806538	0.545051821432062
chrMT	A7	62001	63001	1	5	2	11.234198616229	0.598177418898793	0.422975309256002
chrMT	A7	62001	63001	1	9	2	10.9954524343836	0.508977450328146	0.359901406598071
chrMT	A8	62001	63001	1	1	2	9.98608830406701	0.0493267144356095	0.0348792542710719
chrMT	A8	62001	63001	1	10	2	11.2783457836242	0.270768745681516	0.191462416204776
chrMT	A8	62001	63001	1	2	2	8.66021302950043	0.333412092019461	0.235757951196554
chrMT	A8	62001	63001	1	3	3	11.4930758454342	0.252274874222488	0.145650966542132
chrMT	A8	62001	63001	1	4	2	9.2004947579527	0.110132755756632	0.0778756184262761
chrMT	A8	62001	63001	1	5	2	9.5233601291973	0.165344938225037	0.116916527053794
chrMT	A8	62001	63001	1	9	2	11.2545754762972	0.398310053924831	0.281647740145027
chrMT	B12	62001	63001	1	1	2	15.202982764852	0.418719752035166	0.296079576080816
chrMT	B12	62001	63001	1	10	2	10.7562216115025	0.799703500683766	0.565475768272112
chrMT	B12	62001	63001	1	2	1	12.2772200029906	NA	NA
chrMT	B12	62001	63001	1	3	3	8.63279630667235	0.337945195616522	0.19511274966054
chrMT	B12	62001	63001	1	4	2	8.81652344331064	0.52847206919036	0.37368618379219
chrMT	B12	62001	63001	1	5	2	10.9949121960597	0.426409406833507	0.301516983133706
chrMT	B12	62001	63001	1	9	2	10.4153252191608	0.153343522077417	0.108430244311971
chrMT	FOUNDER	63001	64001	0	0	2	6.76542382710536	0.269699524065424	0.190706362349446
chrMT	A7	63001	64001	1	1	2	12.3690247131013	0.877155997716257	0.620242954143617
chrMT	A7	63001	64001	1	10	2	14.0103385986128	0.340155254232461	0.240526086924008
chrMT	A7	63001	64001	1	2	2	12.0722767490372	0.415090062144707	0.293512997745668
chrMT	A7	63001	64001	1	3	2	12.1509833022264	0.17409445698936	0.123103371104166
chrMT	A7	63001	64001	1	4	2	17.7544919677574	0.566251703044106	0.400400419080919
chrMT	A7	63001	64001	1	5	2	13.8023510847656	0.124426147816069	0.087982572877662
chrMT	A7	63001	64001	1	9	2	13.4204126032349	0.566342829423137	0.400464855161476
chrMT	A8	63001	64001	1	1	2	10.0860535409657	0.283843953560701	0.200707984361571
chrMT	A8	63001	64001	1	10	2	14.5511749971848	0.0331967196682166	0.0234736255905448
chrMT	A8	63001	64001	1	2	2	10.2848196407472	0.264955631749101	0.187351923923355
chrMT	A8	63001	64001	1	3	3	14.3320094993292	0.630893692740531	0.364246643333783
chrMT	A8	63001	64001	1	4	2	11.6290297732229	0.111282243837323	0.0786884292430257
chrMT	A8	63001	64001	1	5	2	11.80430338072	0.273725431260961	0.193553108627838
chrMT	A8	63001	64001	1	9	2	14.6289514835736	0.136147265991915	0.0962706550228915
chrMT	B12	63001	64001	1	1	2	20.7325690447265	0.632787172947876	0.447448101039308
chrMT	B12	63001	64001	1	10	2	13.7129907957574	0.893088041702258	0.631508610484281
chrMT	B12	63001	64001	1	2	1	15.4720270010467	NA	NA
chrMT	B12	63001	64001	1	3	3	10.8883364385189	0.514723381737538	0.297175683004362
chrMT	B12	63001	64001	1	4	2	11.3689241827815	0.719106071540842	0.508484779578948
chrMT	B12	63001	64001	1	5	2	14.444367576963	0.234043880126253	0.165494014732485
chrMT	B12	63001	64001	1	9	2	13.638819555921	0.049121856232612	0.0347343976465506
chrMT	FOUNDER	64001	65001	0	0	2	6.76877889907479	0.0825609918113259	0.0583794371712756
chrMT	A7	64001	65001	1	1	2	10.0227734489486	0.528977825141349	0.374043807254759
chrMT	A7	64001	65001	1	10	2	13.580022882488	0.429611962833003	0.303781532198079
chrMT	A7	64001	65001	1	2	2	10.4536170093816	0.207274674894376	0.146565328186051
chrMT	A7	64001	65001	1	3	2	11.733406995153	0.0236256548382926	0.0167058607461294
chrMT	A7	64001	65001	1	4	2	16.3159934877309	0.647615781350048	0.457933510596043
chrMT	A7	64001	65001	1	5	2	12.566196684313	0.0893670521491321	0.0631920485893032
chrMT	A7	64001	65001	1	9	2	12.783443671419	0.382387657251612	0.270388905484652
chrMT	A8	64001	65001	1	1	2	9.01385774504507	0.0563013616094233	0.0398110745840592
chrMT	A8	64001	65001	1	10	2	14.6684464536991	0.257265388659744	0.181914100885898
chrMT	A8	64001	65001	1	2	2	10.0969620131145	0.184933546157665	0.13076776455696
chrMT	A8	64001	65001	1	3	3	14.2579648428883	0.510246546377348	0.294590980904039
chrMT	A8	64001	65001	1	4	2	11.2388519785935	0.0582391233220536	0.0411812790313837
chrMT	A8	64001	65001	1	5	2	11.5957713464435	0.1631856744356	0.115389696985913
chrMT	A8	64001	65001	1	9	2	14.0225500763036	0.100855228666649	0.0713154161083071
chrMT	B12	64001	65001	1	1	2	20.7252676191448	0.0520355566891951	0.0367946949977469
chrMT	B12	64001	65001	1	10	2	13.6729995590975	0.189527508067484	0.134016186175906
chrMT	B12	64001	65001	1	2	1	14.9893726101724	NA	NA
chrMT	B12	64001	65001	1	3	3	10.9050923981642	0.540932332287909	0.312307427659796
chrMT	B12	64001	65001	1	4	2	11.509925685901	0.478540071170113	0.33837892939388
chrMT	B12	64001	65001	1	5	2	15.745426728197	0.299715389037186	0.211930784014158
chrMT	B12	64001	65001	1	9	2	13.423467525442	0.0248434540650079	0.0175669748374636
chrMT	FOUNDER	65001	66001	0	0	2	6.6134853839722	0.167019058250132	0.118100308676059
chrMT	A7	65001	66001	1	1	2	8.5911499454737	0.107881154575123	0.0762834959623033
chrMT	A7	65001	66001	1	10	2	12.7266565673181	0.156955400006442	0.110984227688403
chrMT	A7	65001	66001	1	2	2	8.8727811708147	0.143607305666691	0.101545699664847
chrMT	A7	65001	66001	1	3	2	11.1195941070232	0.162168655758241	0.114670556182559
chrMT	A7	65001	66001	1	4	2	14.4850249076931	0.59787469981688	0.422761254540387
chrMT	A7	65001	66001	1	5	2	11.7770552529718	0.244728344588259	0.173049072006916
chrMT	A7	65001	66001	1	9	2	12.7614008879918	0.180093195439174	0.127345119740594
chrMT	A8	65001	66001	1	1	2	8.40090585480981	0.296921733204605	0.209955371030639
chrMT	A8	65001	66001	1	10	2	13.9078007846639	0.0934872538389352	0.0661054711440192
chrMT	A8	65001	66001	1	2	2	9.55012837754485	0.233929787028723	0.165413338729535
chrMT	A8	65001	66001	1	3	3	13.5009943949526	0.133782201155705	0.0772391898500268
chrMT	A8	65001	66001	1	4	2	11.1033715750254	0.215924556733026	0.152681718290622
chrMT	A8	65001	66001	1	5	2	11.4801944709865	0.00600137772989898	0.00424361488927349
chrMT	A8	65001	66001	1	9	2	13.5463125430447	0.187192763098573	0.132365272176048
chrMT	B12	65001	66001	1	1	2	24.0432064867222	0.279560493170255	0.197679120472543
chrMT	B12	65001	66001	1	10	2	33.5987175982794	0.285033261681372	0.201548952198618
chrMT	B12	65001	66001	1	2	1	16.9891696750903	NA	NA
chrMT	B12	65001	66001	1	3	3	11.6327911595449	0.458667231363791	0.264811649496345
chrMT	B12	65001	66001	1	4	2	11.5425410511222	0.401965207741137	0.284232324194817
chrMT	B12	65001	66001	1	5	2	18.1109421147193	0.395505007057528	0.279664272483611
chrMT	B12	65001	66001	1	9	2	34.919160641801	0.513871843546953	0.363362265232883
chrMT	FOUNDER	66001	67001	0	0	2	6.30203998122458	0.18043718042457	0.127588353856394
chrMT	A7	66001	67001	1	1	2	6.72789998312252	0.359464963677985	0.254180113415679
chrMT	A7	66001	67001	1	10	2	12.0513767109585	0.157409288780008	0.111305175518095
chrMT	A7	66001	67001	1	2	2	7.65438182718832	0.178574800214518	0.126271452180719
chrMT	A7	66001	67001	1	3	2	10.1918793965096	0.0509932096544921	0.0360576443411587
chrMT	A7	66001	67001	1	4	2	13.4652453748515	0.424839922325695	0.300407189995265
chrMT	A7	66001	67001	1	5	2	10.5327553332466	0.527205191281667	0.372790365832017
chrMT	A7	66001	67001	1	9	2	11.6617959024223	0.141498895860064	0.10005482879306
chrMT	A8	66001	67001	1	1	2	6.99180323075998	0.01511745485249	0.0106896548404771
chrMT	A8	66001	67001	1	10	2	12.8137293966227	0.383424035004078	0.271121735221292
chrMT	A8	66001	67001	1	2	2	8.29517843431995	0.0237573792475831	0.0167990039691865
chrMT	A8	66001	67001	1	3	3	13.209103726214	0.0772038901240194	0.0445736867455889
chrMT	A8	66001	67001	1	4	2	10.2374444018139	0.198619734760879	0.140445361326891
chrMT	A8	66001	67001	1	5	2	10.8473844505056	0.0845161142467082	0.0597619175033843
chrMT	A8	66001	67001	1	9	2	12.594628080198	0.208323078742205	0.147306661656272
chrMT	B12	66001	67001	1	1	2	19.8072619909524	0.49297500014107	0.348585965555189
chrMT	B12	66001	67001	1	10	2	76.1609607723422	2.75943125667758	1.95121255381483
chrMT	B12	66001	67001	1	2	1	13.8473500950591	NA	NA
chrMT	B12	66001	67001	1	3	3	10.8618049944308	0.406024839129878	0.234418550169309
chrMT	B12	66001	67001	1	4	2	11.4931808218949	0.399543100647891	0.282519635844423
chrMT	B12	66001	67001	1	5	2	23.3320208069729	0.484518374228242	0.342606228026272
chrMT	B12	66001	67001	1	9	2	79.8165092596895	0.72908672583197	0.515542167908883
chrMT	FOUNDER	67001	68001	0	0	2	6.7586425678634	0.0304939638783573	0.0215624886436441
chrMT	A7	67001	68001	1	1	2	6.23704729698689	0.652111471471018	0.461112443566695
chrMT	A7	67001	68001	1	10	2	12.6579944464387	0.401156820215714	0.283660707893764
chrMT	A7	67001	68001	1	2	2	7.50552698499496	0.132968953921142	0.0940232490049211
chrMT	A7	67001	68001	1	3	2	10.7383778257083	0.0632281330621562	0.044709041650016
chrMT	A7	67001	68001	1	4	2	14.3156966186299	0.352625122555948	0.249343615376048
chrMT	A7	67001	68001	1	5	2	10.7675716808738	0.205128550630362	0.145047789165697
chrMT	A7	67001	68001	1	9	2	12.6187896617489	0.177904762334467	0.125797663852083
chrMT	A8	67001	68001	1	1	2	4.97174429790027	0.033842338686677	0.0239301471765612
chrMT	A8	67001	68001	1	10	2	14.0881716594064	0.396365001367215	0.280272380291773
chrMT	A8	67001	68001	1	2	2	8.1849774614239	0.382320260918848	0.270341249080727
chrMT	A8	67001	68001	1	3	3	13.9502059052132	0.277969848481669	0.160485966847491
chrMT	A8	67001	68001	1	4	2	10.8575830354352	0.285193388151441	0.201662178711451
chrMT	A8	67001	68001	1	5	2	11.7420122069892	0.174076104561481	0.123090393977962
chrMT	A8	67001	68001	1	9	2	13.9101591910202	0.176532941500517	0.124827640037823
chrMT	B12	67001	68001	1	1	2	13.2711433911561	0.274304110180425	0.19396229641592
chrMT	B12	67001	68001	1	10	2	32.3061898000041	2.32974352996	1.6473774484602
chrMT	B12	67001	68001	1	2	1	10.7564458590562	NA	NA
chrMT	B12	67001	68001	1	3	3	10.6200712236789	0.300545443048268	0.173519992447633
chrMT	B12	67001	68001	1	4	2	10.0221131688471	0.211459559158126	0.149524488227429
chrMT	B12	67001	68001	1	5	2	15.3568036330667	0.362310199741527	0.256191999130286
chrMT	B12	67001	68001	1	9	2	32.980940531861	0.124328345264453	0.0879134160301973
chrMT	FOUNDER	68001	69001	0	0	2	6.75310988788381	0.0227780436284204	0.0161065091118191
chrMT	A7	68001	69001	1	1	2	5.78727672163189	0.279866661450991	0.197895614140035
chrMT	A7	68001	69001	1	10	2	12.4215263632492	0.243519676714524	0.172194414757196
chrMT	A7	68001	69001	1	2	2	7.05234299114713	0.111724054737022	0.0790008367262054
chrMT	A7	68001	69001	1	3	2	10.653371574287	0.189380156412166	0.133911992821211
chrMT	A7	68001	69001	1	4	2	13.428862367812	0.0573385203544213	0.0405444565658142
chrMT	A7	68001	69001	1	5	2	10.3367637947745	0.269720690468072	0.190721329256291
chrMT	A7	68001	69001	1	9	2	12.012948823579	0.132617870518672	0.0937749955502722
chrMT	A8	68001	69001	1	1	2	4.24807973883673	0.014324124976707	0.0101286859055931
chrMT	A8	68001	69001	1	10	2	14.1860742805544	0.0112516598458352	0.00795612497659448
chrMT	A8	68001	69001	1	2	2	7.84254909099685	0.0357365802355285	0.0252695782209593
chrMT	A8	68001	69001	1	3	3	13.567135200867	0.24019986237416	0.138679455201033
chrMT	A8	68001	69001	1	4	2	10.5054867715927	0.344994567382987	0.24394799806903
chrMT	A8	68001	69001	1	5	2	11.6106947655556	0.0374533974780558	0.0264835513352084
chrMT	A8	68001	69001	1	9	2	13.7040481976491	0.218850737912533	0.154750840845632
chrMT	B12	68001	69001	1	1	2	10.3756410317616	0.0770265714434124	0.054466010999187
chrMT	B12	68001	69001	1	10	2	13.3898092187154	0.394870197707408	0.279215394487381
chrMT	B12	68001	69001	1	2	1	9.13148057163608	NA	NA
chrMT	B12	68001	69001	1	3	3	9.94990494662374	0.3924870419001	0.226602499294462
chrMT	B12	68001	69001	1	4	2	9.288003497615	0.0561468209799507	0.0397017978569902
chrMT	B12	68001	69001	1	5	2	12.1409513059383	0.145734786027566	0.103050055454863
chrMT	B12	68001	69001	1	9	2	13.0472456431343	0.338937108095956	0.239664727530409
chrMT	FOUNDER	69001	70001	0	0	2	7.18245997426536	0.23620545862526	0.1670224815472
chrMT	A7	69001	70001	1	1	2	6.07352143869827	0.0417127665171727	0.029495380066344
chrMT	A7	69001	70001	1	10	2	13.4779728043053	0.0162416581466159	0.0114845866131859
chrMT	A7	69001	70001	1	2	2	7.48711894102254	0.18954466682745	0.134028319251434
chrMT	A7	69001	70001	1	3	2	11.2781754046289	0.00681484568694341	0.00481882359797758
chrMT	A7	69001	70001	1	4	2	14.5208516376534	0.0394279691935095	0.0278797843851448
chrMT	A7	69001	70001	1	5	2	11.1045255500627	0.170823768056064	0.120790644780281
chrMT	A7	69001	70001	1	9	2	13.0088836183627	0.032401310001186	0.0229111860211661
chrMT	A8	69001	70001	1	1	2	4.44953524036851	0.0744964701357323	0.0526769592074374
chrMT	A8	69001	70001	1	10	2	14.7501382946468	0.225041442292831	0.159128329893262
chrMT	A8	69001	70001	1	2	2	8.19567602936356	0.190209271655428	0.134498265832107
chrMT	A8	69001	70001	1	3	3	14.0676751444344	0.09959845982773	0.057503197592412
chrMT	A8	69001	70001	1	4	2	11.0965333118819	0.31461464325016	0.222466147702774
chrMT	A8	69001	70001	1	5	2	11.7767297223149	0.225386770919367	0.159372514106823
chrMT	A8	69001	70001	1	9	2	14.277252149657	0.303098744834153	0.214323177841361
chrMT	B12	69001	70001	1	1	2	10.897683209151	0.206965320529782	0.146346581617056
chrMT	B12	69001	70001	1	10	2	14.0995981087157	0.0272321896390459	0.0192560659603274
chrMT	B12	69001	70001	1	2	1	9.42118642257492	NA	NA
chrMT	B12	69001	70001	1	3	3	10.5796840431406	0.355073114277595	0.205001558110168
chrMT	B12	69001	70001	1	4	2	9.52310748214393	0.556710740082709	0.393653939471865
chrMT	B12	69001	70001	1	5	2	12.4557267582132	0.111285826527786	0.0786909625877472
chrMT	B12	69001	70001	1	9	2	13.9001476394464	0.150769516129515	0.106610147251395
chrMT	FOUNDER	70001	71001	0	0	2	6.80290119782186	0.0042508822905736	0.0030058276936904
chrMT	A7	70001	71001	1	1	2	5.64380824775649	0.0219877136677706	0.0155476614372687
chrMT	A7	70001	71001	1	10	2	12.8472538546184	0.170904056272802	0.120847417122786
chrMT	A7	70001	71001	1	2	2	7.23682698314749	0.110063828322209	0.0778268793699861
chrMT	A7	70001	71001	1	3	2	10.5920452860348	0.125454261036646	0.0887095587077597
chrMT	A7	70001	71001	1	4	2	13.8614460847888	0.20549023898417	0.145303541453351
chrMT	A7	70001	71001	1	5	2	10.6454008699174	0.154418993022525	0.109190717110225
chrMT	A7	70001	71001	1	9	2	12.4117507718702	0.185731635864385	0.131332099200577
chrMT	A8	70001	71001	1	1	2	4.51797014320025	0.0568635057478081	0.0402085705163153
chrMT	A8	70001	71001	1	10	2	14.0875845885414	0.153914556299816	0.108834026482919
chrMT	A8	70001	71001	1	2	2	7.94142968617963	0.252217488867048	0.178344696711732
chrMT	A8	70001	71001	1	3	3	13.722720632348	0.33419472429487	0.192947414033396
chrMT	A8	70001	71001	1	4	2	10.9871751146489	0.181611361640052	0.128418625356203
chrMT	A8	70001	71001	1	5	2	11.8348067059406	0.275524163232257	0.194825004202278
chrMT	A8	70001	71001	1	9	2	13.7896321025619	0.442525986832631	0.312913126140622
chrMT	B12	70001	71001	1	1	2	10.5769536517943	0.0800157222122148	0.0565796597777961
chrMT	B12	70001	71001	1	10	2	13.7915189142942	0.251607279572549	0.177913213581649
chrMT	B12	70001	71001	1	2	1	9.88432700318288	NA	NA
chrMT	B12	70001	71001	1	3	3	10.2715142696583	0.475474443696304	0.274515298060849
chrMT	B12	70001	71001	1	4	2	9.43596083266171	0.313949283805882	0.221995667527799
chrMT	B12	70001	71001	1	5	2	11.8707754051591	0.0823948772352191	0.0582619764280565
chrMT	B12	70001	71001	1	9	2	13.202812637413	0.110603571339907	0.0782085353178985
chrMT	FOUNDER	71001	72001	0	0	2	7.10633593140846	0.028228035657469	0.019960235432972
chrMT	A7	71001	72001	1	1	2	6.03634415121632	0.421673590727717	0.298168255450849
chrMT	A7	71001	72001	1	10	2	13.8309361773286	0.0016241477538275	0.00114844589038032
chrMT	A7	71001	72001	1	2	2	7.90732953121534	0.0661943766563276	0.0468064926101057
chrMT	A7	71001	72001	1	3	2	11.7610846315086	0.0386115607945438	0.0273024964700186
chrMT	A7	71001	72001	1	4	2	15.0547864122972	0.0461539427769588	0.0326357659160834
chrMT	A7	71001	72001	1	5	2	11.1217607525422	0.281246177689623	0.198871079427129
chrMT	A7	71001	72001	1	9	2	13.1809676392354	0.0736283735672001	0.0520631222371035
chrMT	A8	71001	72001	1	1	2	4.52011860421558	0.0394308720274883	0.0278818369987359
chrMT	A8	71001	72001	1	10	2	14.8491311939842	0.00364413698344447	0.00257679397256627
chrMT	A8	71001	72001	1	2	2	8.22090981309464	0.122817402186576	0.0868450179338431
chrMT	A8	71001	72001	1	3	3	14.3801530604995	0.410791402145184	0.237170526609306
chrMT	A8	71001	72001	1	4	2	11.6179246419483	0.258026864910797	0.18245254590673
chrMT	A8	71001	72001	1	5	2	12.2129824955538	0.110281130234604	0.0779805350258052
chrMT	A8	71001	72001	1	9	2	14.6660906048956	0.501610478438783	0.354692170818292
chrMT	B12	71001	72001	1	1	2	10.6825912536863	0.0256527711486164	0.0181392484354133
chrMT	B12	71001	72001	1	10	2	13.9868505290272	0.348387220482346	0.246346966081799
chrMT	B12	71001	72001	1	2	1	9.73186935253028	NA	NA
chrMT	B12	71001	72001	1	3	3	10.4948079225352	0.550611805003758	0.317895873837905
chrMT	B12	71001	72001	1	4	2	9.39755192634565	0.662756347804437	0.468639507806947
chrMT	B12	71001	72001	1	5	2	13.032570062289	0.145895885599438	0.103163970054579
chrMT	B12	71001	72001	1	9	2	13.8518424880996	0.0709307042173349	0.0501555819464148
chrMT	FOUNDER	72001	73001	0	0	2	6.81407166155318	0.152744774398896	0.108006865768269
chrMT	A7	72001	73001	1	1	2	5.81931850702848	0.435682722257661	0.308074207354208
chrMT	A7	72001	73001	1	10	2	13.0669218395817	0.0563804718632486	0.0398670139810004
chrMT	A7	72001	73001	1	2	2	7.09484384863767	0.052627159607292	0.0372130214329029
chrMT	A7	72001	73001	1	3	2	10.9590099838291	0.444012504383691	0.31396425278133
chrMT	A7	72001	73001	1	4	2	14.1130338471118	0.190138143681827	0.134447970759642
chrMT	A7	72001	73001	1	5	2	10.7218012173331	0.417114680480495	0.294944619100218
chrMT	A7	72001	73001	1	9	2	12.7842488127565	0.0997494373917227	0.0705335035992301
chrMT	A8	72001	73001	1	1	2	4.47360571486245	0.0401926086470073	0.028420466127876
chrMT	A8	72001	73001	1	10	2	14.3991631985923	0.101753542723408	0.0719506200694768
chrMT	A8	72001	73001	1	2	2	8.433631461595	0.109174861241212	0.0771982847187615
chrMT	A8	72001	73001	1	3	3	13.8364185443535	0.368626007138005	0.212826324451424
chrMT	A8	72001	73001	1	4	2	11.0041470431306	0.0794835803711209	0.0562033786734055
chrMT	A8	72001	73001	1	5	2	11.8367988518472	0.158546448385118	0.11210926878616
chrMT	A8	72001	73001	1	9	2	14.2667924681225	0.159516355544672	0.112795096715802
chrMT	B12	72001	73001	1	1	2	10.5142901470412	0.415114007372956	0.29352992957894
chrMT	B12	72001	73001	1	10	2	13.5185971737638	0.525890631535203	0.371860831721018
chrMT	B12	72001	73001	1	2	1	9.25141520517805	NA	NA
chrMT	B12	72001	73001	1	3	3	10.3206426024101	0.615110198801965	0.355134038859599
chrMT	B12	72001	73001	1	4	2	9.49568385902498	0.426298423489487	0.301438506058551
chrMT	B12	72001	73001	1	5	2	12.7004733886607	0.153430790688248	0.108491952538474
chrMT	B12	72001	73001	1	9	2	13.0706287209383	0.155494950770479	0.109951534130074
chrMT	FOUNDER	73001	74001	0	0	2	4.46034573528022	0.0252174966436695	0.0178314628812877
chrMT	A7	73001	74001	1	1	2	3.91310322261592	0.237508135919139	0.167943613495399
chrMT	A7	73001	74001	1	10	2	9.10004742694002	0.136066438526905	0.0962135013742769
chrMT	A7	73001	74001	1	2	2	5.09449837144131	0.0282463045751545	0.0199731535085523
chrMT	A7	73001	74001	1	3	2	7.79088579467176	0.0175444540209815	0.0124058024104516
chrMT	A7	73001	74001	1	4	2	9.68313025872725	0.478156683339394	0.338107833258954
chrMT	A7	73001	74001	1	5	2	7.06539911881002	0.0320445110029818	0.0226588910300154
chrMT	A7	73001	74001	1	9	2	8.42919431846122	0.153515033462894	0.108551521175692
chrMT	A8	73001	74001	1	1	2	2.90747459447949	0.0875193448058044	0.0618855221971879
chrMT	A8	73001	74001	1	10	2	10.0642248146539	0.0800644835700005	0.0566141392645463
chrMT	A8	73001	74001	1	2	2	5.44366793175113	0.0561579495298134	0.0397096669300629
chrMT	A8	73001	74001	1	3	3	9.23561570339133	0.507290505978264	0.292884310183892
chrMT	A8	73001	74001	1	4	2	7.46943368360557	0.112658898696006	0.0796618712289541
chrMT	A8	73001	74001	1	5	2	7.55448254009012	0.0118952321122349	0.00841119929034928
chrMT	A8	73001	74001	1	9	2	9.93266443391057	0.275543288294845	0.194838527663725
chrMT	B12	73001	74001	1	1	2	7.03998242666597	0.0381741792141285	0.0269932209885408
chrMT	B12	73001	74001	1	10	2	8.86680608852495	0.0441172932413183	0.0311956372185316
chrMT	B12	73001	74001	1	2	1	6.09205776173285	NA	NA
chrMT	B12	73001	74001	1	3	3	6.67568052981289	0.453494642475322	0.26182525390918
chrMT	B12	73001	74001	1	4	2	6.22440964035691	0.555588707250163	0.392860542447258
chrMT	B12	73001	74001	1	5	2	8.44809901797682	0.206625867941774	0.146106552390185
chrMT	B12	73001	74001	1	9	2	8.49246360019307	0.524398227397581	0.370805542635034
chrMT	FOUNDER	74001	75001	0	0	2	6.42676084491447	0.166731819288048	0.117897200058148
chrMT	A7	74001	75001	1	1	2	5.67019895231879	0.105522804213993	0.0746158904295351
chrMT	A7	74001	75001	1	10	2	12.3493288844922	0.217851319609231	0.154044145386125
chrMT	A7	74001	75001	1	2	2	7.10835898858799	0.0801296377820353	0.0566602102496989
chrMT	A7	74001	75001	1	3	2	10.6595175084224	0.0326553913056937	0.0230908486345562
chrMT	A7	74001	75001	1	4	2	13.527669249109	0.565122902459761	0.399602236533121
chrMT	A7	74001	75001	1	5	2	10.0469507689824	0.348614546447678	0.246507709813426
chrMT	A7	74001	75001	1	9	2	11.8743088055711	0.182009431833305	0.128700103489241
chrMT	A8	74001	75001	1	1	2	4.09106287407993	0.0187521899267814	0.0132598006593252
chrMT	A8	74001	75001	1	10	2	13.587070314839	0.272602494201496	0.192759072218244
chrMT	A8	74001	75001	1	2	2	7.51626712945287	0.0697775984919679	0.0493402130685827
chrMT	A8	74001	75001	1	3	3	13.009475388578	0.246559702878891	0.142351310828442
chrMT	A8	74001	75001	1	4	2	10.3400830353033	0.0257873330306838	0.0182343980547124
chrMT	A8	74001	75001	1	5	2	11.0286464432212	0.000245109940997685	0.000173318901415698
chrMT	A8	74001	75001	1	9	2	13.5831274611757	0.169942178793456	0.12016726703447
chrMT	B12	74001	75001	1	1	2	10.3580055475771	0.479394677470752	0.338983227304307
chrMT	B12	74001	75001	1	10	2	12.9037708165905	0.440507415921452	0.311485780961021
chrMT	B12	74001	75001	1	2	1	9.14373144212078	NA	NA
chrMT	B12	74001	75001	1	3	3	9.36112677052545	0.547285873375364	0.315975646316946
chrMT	B12	74001	75001	1	4	2	8.67384863350926	0.63017485474686	0.445600913124752
chrMT	B12	74001	75001	1	5	2	11.5371167153087	0.345905889832623	0.244592400353015
chrMT	B12	74001	75001	1	9	2	12.2652650641673	0.0396420802640279	0.0280311837750355
chrMT	FOUNDER	75001	76001	0	0	2	6.41454804825065	0.101898857542934	0.0720533731637705
chrMT	A7	75001	76001	1	1	2	5.78332524819353	0.417874086130579	0.295481599985063
chrMT	A7	75001	76001	1	10	2	12.2203133917174	0.178268590235401	0.126054929028018
chrMT	A7	75001	76001	1	2	2	6.71442413834398	0.00255970263755872	0.00180998309283886
chrMT	A7	75001	76001	1	3	2	10.5252496483427	0.32704493052813	0.231255688129124
chrMT	A7	75001	76001	1	4	2	13.5541333178041	0.232640675220482	0.16450179902822
chrMT	A7	75001	76001	1	5	2	11.0066738044012	0.0900011092270466	0.0636403946487558
chrMT	A7	75001	76001	1	9	2	11.754295431721	0.190284461807301	0.134551433298375
chrMT	A8	75001	76001	1	1	2	4.11724684622129	0.241693920132279	0.170903409897094
chrMT	A8	75001	76001	1	10	2	13.5375385591752	0.641363704568932	0.453512624707617
chrMT	A8	75001	76001	1	2	2	7.48275380077482	0.12617523638554	0.0892193652660307
chrMT	A8	75001	76001	1	3	3	13.0579714409866	0.482843248428319	0.278769679456484
chrMT	A8	75001	76001	1	4	2	10.3807988913543	0.19430079134954	0.137391407153173
chrMT	A8	75001	76001	1	5	2	11.414262778822	0.0786820070449984	0.0556365807388861
chrMT	A8	75001	76001	1	9	2	13.3632547594676	0.132820487118032	0.0939182671216612
chrMT	B12	75001	76001	1	1	2	10.5286994720318	0.103933342339247	0.0734919711594646
chrMT	B12	75001	76001	1	10	2	12.4391594543589	0.458911059052206	0.324499121817315
chrMT	B12	75001	76001	1	2	1	9.39702646700703	NA	NA
chrMT	B12	75001	76001	1	3	3	9.6998049881509	0.222011855486026	0.128178604528145
chrMT	B12	75001	76001	1	4	2	8.86635111708291	0.0160691903344356	0.0113626334536567
chrMT	B12	75001	76001	1	5	2	11.4491660510764	0.496840017072074	0.351318945236503
chrMT	B12	75001	76001	1	9	2	12.5590271633995	0.000350680522291674	0.000247968575342483
chrMT	FOUNDER	76001	77001	0	0	2	6.07213514632568	0.314587801261527	0.222447167550592
chrMT	A7	76001	77001	1	1	2	5.61289340188817	0.314067232204947	0.222079069640608
chrMT	A7	76001	77001	1	10	2	11.8539561426461	0.107425744963547	0.0759614727377409
chrMT	A7	76001	77001	1	2	2	6.73454364372173	0.0236931330415632	0.0167535750412444
chrMT	A7	76001	77001	1	3	2	9.97727219431603	0.0696713220177085	0.0492650642529533
chrMT	A7	76001	77001	1	4	2	12.9647049080164	0.533101614773481	0.376959766867827
chrMT	A7	76001	77001	1	5	2	11.2051699011504	0.203562118471426	0.143940154363845
chrMT	A7	76001	77001	1	9	2	11.1307714921217	0.370049076490033	0.261664211357922
chrMT	A8	76001	77001	1	1	2	3.90727993164512	0.0857147353760743	0.0606094706320326
chrMT	A8	76001	77001	1	10	2	13.0845242947043	0.0810739150177467	0.0573279150863906
chrMT	A8	76001	77001	1	2	2	7.36776772563989	0.187223120881186	0.132386738369995
chrMT	A8	76001	77001	1	3	3	12.0329202581665	0.376700592451854	0.217488188455969
chrMT	A8	76001	77001	1	4	2	9.87786445968743	0.0267359619535671	0.0189051799989128
chrMT	A8	76001	77001	1	5	2	10.0888150839658	0.035216562292058	0.0249018700067927
chrMT	A8	76001	77001	1	9	2	13.0858722542801	0.102123976078221	0.0722125560066429
chrMT	B12	76001	77001	1	1	2	9.9369935880425	0.211435276860719	0.149507318050269
chrMT	B12	76001	77001	1	10	2	11.8755038894774	0.14555696504303	0.10292431703086
chrMT	B12	76001	77001	1	2	1	8.62429239741098	NA	NA
chrMT	B12	76001	77001	1	3	3	9.08839872308574	0.45433852700902	0.262312470871876
chrMT	B12	76001	77001	1	4	2	8.51165958259503	0.502239315068626	0.355136825463513
chrMT	B12	76001	77001	1	5	2	11.3797652442313	0.524894601864763	0.371156532386787
chrMT	B12	76001	77001	1	9	2	11.6184069822199	0.0625728135357777	0.0442456607690698
