# Supplementary material for: Genetically controlled mtDNA deletions prevent ROS damage by arresting oxidative phosphorylation
Source: eLife. 2022 Jul 8;11:e76095. doi: 10.7554/eLife.76095 (PMC9427111; doi:10.7554/eLife.76095)
Supplement: Figure 3—source data 4. — Data are shown in Figure 3B and Figure 3—figure supplement 1. [file elife-76095-fig3-data4.xlsx]

## Sheet: Data S16 - qPCR
README: Ct values are capped at 30. Thus, values with 0 standard deviation if both replicates are capped.
Batch cycle t	Population	Primer	N	Log2 Fold change	SD Log2 Fold change	S.E.M Log2 Fold change	Generations of selection G
0	A4	ATP6	2	0.509234411820798	0.0632886162572287	0.0447518097273996	2.21463411099468
0	A4	ATP8	2	0.829476830510801	0.0496423899527546	0.0351024705698997	2.21463411099468
0	A4	COB	2	0.423121857995897	0.149020062942093	0.1053730970392	2.21463411099468
0	A4	COX1	2	-0.432572654970854	0.125033814049261	0.0884122577918501	2.21463411099468
0	A4	COX2	2	0.821900617711251	0.0654770254594483	0.0462992487143001	2.21463411099468
0	A4	COX3	2	1.4820986594387	0.00446372602388868	0.00315633094085055	2.21463411099468
0	A4	OLI1	2	0.8629864635641	0.0519745722013582	0.0367515724528502	2.21463411099468
0	A4	rnl	2	0.772841719311349	0.0128110835878261	0.00905880407929954	2.21463411099468
0	A4	rns	2	-0.156118185442	1.35511735434207	0.95821267055885	2.21463411099468
0	A4	VAR1	2	0.753149306684099	0.0984276085719497	0.0695988294772008	2.21463411099468
0	A7	VAR1	3	0.823082969459998	0.0907450812699854	0.0523916970988606	2.13070778301687
0	A7	rns	3	1.0581860159741	0.0333026219266737	0.0192272777340854	2.13070778301687
0	A7	ATP6	3	0.811646445420035	0.0483675846603152	0.027925038023685	2.13070778301687
0	A7	ATP8	3	0.741430501550932	0.0260377857206555	0.0150329225949222	2.13070778301687
0	A7	COB	3	0.765794559007736	0.102503486802296	0.0591804156981808	2.13070778301687
0	A7	COX1	3	0.312087688898799	0.129959574979391	0.0750321955981206	2.13070778301687
0	A7	COX2	3	0.953341219883168	0.0385057844868939	0.0222313250388659	2.13070778301687
0	A7	COX3	3	1.13687678248523	0.0369692019869465	0.0213441787188892	2.13070778301687
0	A7	OLI1	3	0.857853374938499	0.0404988133812387	0.0233820008075186	2.13070778301687
0	A7	rnl	3	0.921611271509767	0.0308038416128452	0.0177846062472508	2.13070778301687
0	A8	ATP6	2	0.689341989342447	0.0069875396475606	0.00494093666859996	2.17436920021753
0	A8	ATP8	2	0.5542363270258	0.0137149121518493	0.00969790738595044	2.17436920021753
0	A8	COB	2	0.542398880054398	0.00436464949229088	0.0030862732535013	2.17436920021753
0	A8	COX1	2	2.68138805014165	2.76661297143082	1.9562907930174	2.17436920021753
0	A8	COX2	2	1.3438779343002	0.0929925029239717	0.0657556294170503	2.17436920021753
0	A8	COX3	2	0.772609624782099	0.0276150313342098	0.0195267759190987	2.17436920021753
0	A8	OLI1	2	0.648879358036747	0.0517890620876952	0.0366203969935004	2.17436920021753
0	A8	rnl	2	0.609686209923646	0.026483868841527	0.0187269232498988	2.17436920021753
0	A8	rns	2	0.967784540668099	0.0435073923414758	0.0307643721564012	2.17436920021753
0	A8	VAR1	2	0.593271995519354	0.126226671445473	0.0892557353457003	2.17436920021753
0	A9	ATP6	2	0.959969797482747	0.0345902426924932	0.0244589951707503	2.18912363348224
0	A9	ATP8	2	1.28843774339791	0.0656646808882759	0.0464319411405506	2.18912363348224
0	A9	COB	2	0.978562474757201	0.0142444782561668	0.0100723671693999	2.18912363348224
0	A9	COX1	2	-0.0783969672468494	0.179591923978379	0.126990667291451	2.18912363348224
0	A9	COX2	2	1.0081954954591	0.0322698889534902	0.0228182573071498	2.18912363348224
0	A9	COX3	2	1.62593484870305	0.015004963268414	0.0106101112785506	2.18912363348224
0	A9	OLI1	2	0.923613505131053	0.0378180772453869	0.0267414188716498	2.18912363348224
0	A9	rnl	2	1.09908324734365	0.0151940284252006	0.0107438005330005	2.18912363348224
0	A9	rns	2	0.42910106408435	0.737578460165066	0.52154673083985	2.18912363348224
0	A9	VAR1	2	0.792380213460699	0.0541909229424288	0.0383187690913491	2.18912363348224
0	B12	ATP6	2	0.682032643828052	0.119354223251585	0.0843961806244487	2.32587168580563
0	B12	ATP8	2	0.968844044513098	0.207776702013114	0.146920314966049	2.32587168580563
0	B12	COB	2	0.695699936958551	0.194472394149154	0.13751274865645	2.32587168580563
0	B12	COX1	2	-0.567186874955752	0.0731593359740428	0.0517314625743506	2.32587168580563
0	B12	COX2	2	0.850527043991802	0.103437279262429	0.0731412015939502	2.32587168580563
0	B12	COX3	2	0.736001068546202	0.168171886894869	0.118915481628299	2.32587168580563
0	B12	OLI1	2	1.0343300626358	0.0550644772626327	0.0389364652749	2.32587168580563
0	B12	rnl	2	1.16622200916255	0.0695089989902569	0.0491502845394995	2.32587168580563
0	B12	rns	2	1.04864507288615	0.0259126234134015	0.0183229917339495	2.32587168580563
0	B12	VAR1	2	-0.0159061911897513	0.997342088298823	0.70522735379885	2.32587168580563
0	B5	ATP6	2	0.813350187093702	0.0700710026372627	0.0495476811293489	2.15633732277114
0	B5	ATP8	2	0.899349529216249	0.0936021224297786	0.0661866955035499	2.15633732277114
0	B5	COB	2	0.798851199862602	0.0942075289520906	0.0666147825608512	2.15633732277114
0	B5	COX1	2	1.25749307389525	2.17152081931556	1.5354970968258	2.15633732277114
0	B5	COX2	2	1.1033065996519	0.0993599559309198	0.0702580986171499	2.15633732277114
0	B5	COX3	2	0.8946706730455	0.00788791962006063	0.00557760145279928	2.15633732277114
0	B5	OLI1	2	1.12496437069355	0.0616261853479575	0.0435762935581998	2.15633732277114
0	B5	rnl	2	0.385164687470752	0.780751779233401	0.5520748775194	2.15633732277114
0	B5	rns	2	1.35460920225735	0.135945583875315	0.0961280442305998	2.15633732277114
0	B5	VAR1	2	1.21239005901015	0.086264287527468	0.0609980626848987	2.15633732277114
0	B8	VAR1	3	0.545272455819768	0.0755672529803274	0.0436287738501126	2.11953542130118
0	B8	rns	3	0.796801111744364	0.0494506072307773	0.0285503213962798	2.11953542130118
0	B8	ATP6	3	0.709079307757234	0.031045036026556	0.0179238599069337	2.11953542130118
0	B8	ATP8	3	0.536173253078199	0.192889269287493	0.111364671546924	2.11953542130118
0	B8	COB	3	0.777367434687067	0.00716560065516444	0.00413706146716455	2.11953542130118
0	B8	COX1	3	0.307822002750799	0.156726531474321	0.0904861051358558	2.11953542130118
0	B8	COX2	3	0.819991213892301	0.0416912284296328	0.0240704419566947	2.11953542130118
0	B8	COX3	3	0.8784890950088	0.0463668743964616	0.0267699274142786	2.11953542130118
0	B8	OLI1	3	0.635437233142665	0.040994294151242	0.0236680667634583	2.11953542130118
0	B8	rnl	3	0.797668773287364	0.0211329346443463	0.0122011055056801	2.11953542130118
0	D1	ATP6	2	1.5763620671346	0.150210769949084	0.10621505403825	2.1518130508064
0	D1	ATP8	2	1.513886921755	0.0273938959100291	0.0193704095611	2.1518130508064
0	D1	COX1	2	1.37430989420865	0.075013608116787	0.0530426309806503	2.1518130508064
0	D1	COB	2	1.18197284934525	0.0706222839276883	0.0499374958681501	2.1518130508064
0	D1	VAR1	2	0.97020088189905	0.267422769700908	0.1890964538992	2.1518130508064
0	D1	COX2	2	1.8712423189716	0.0837303711838978	0.0592063132554008	2.1518130508064
0	D1	COX3	2	1.63574974389265	0.0540241993849202	0.0382008777332512	2.1518130508064
0	D1	OLI1	2	1.46932781130955	0.126283157692122	0.0892956771537499	2.1518130508064
0	D1	rnl	2	1.32628048958495	0.0125443739441523	0.00887021188164994	2.1518130508064
0	D1	rns	2	1.2461487049877	0.202194602843204	0.14297317478975	2.1518130508064
1	A4	ATP6	2	-1.85363162377915	0.00424389586741504	0.00300088754649874	5.60015811139216
1	A4	ATP8	2	-1.959224923534	0.220256645466271	0.155744967610602	5.60015811139216
1	A4	COB	2	-1.7801965118904	0.0696215470239022	0.0492298680172993	5.60015811139216
1	A4	COX1	2	-2.2543721271088	1.14325118040175	0.808400662261601	5.60015811139216
1	A4	COX2	2	-0.477314267916996	0.000364492565065205	0.000257735164449685	5.60015811139216
1	A4	COX3	2	1.6172378679418	0.0239674810304624	0.0169475683645999	5.60015811139216
1	A4	OLI1	2	-0.250659249017847	0.199931373860213	0.1413728302285	5.60015811139216
1	A4	rnl	2	-0.801713683559397	0.0912184635721712	0.0645011941613003	5.60015811139216
1	A4	rns	2	1.5272093107895	0.746097002348386	0.5275702497835	5.60015811139216
1	A4	VAR1	2	-0.646814779496154	0.00663554289725147	0.00469203737950075	5.60015811139216
1	A7	COX3	3	1.12988032340743	0.0342191910100873	0.0197564591411251	5.94856083211813
1	A7	COX2	3	0.282534956896098	0.0683164372119927	0.0394425134144202	5.94856083211813
1	A7	ATP6	3	-0.234869326246601	0.0724877173784157	0.0418508031413698	5.94856083211813
1	A7	ATP8	3	-0.556420163350835	0.0630608582013798	0.0364082034578954	5.94856083211813
1	A7	COB	3	-1.08624172062493	0.0493319144997023	0.0284817941160427	5.94856083211813
1	A7	COX1	3	-1.18091353591903	0.0586816601902071	0.0338798723073102	5.94856083211813
1	A7	rns	3	1.76632979797963	0.0932878185309702	0.0538597471409686	5.94856083211813
1	A7	VAR1	3	-0.264286697708667	0.0568720722050373	0.0328351061969501	5.94856083211813
1	A7	OLI1	3	-0.355462897731767	0.0397110836012356	0.0229272048069851	5.94856083211813
1	A7	rnl	3	-0.686350755668035	0.0360187807013175	0.0207954527337877	5.94856083211813
1	A8	ATP6	2	-2.9691994186705	0.0678858619657843	0.0480025533427	5.74861334885817
1	A8	ATP8	2	-3.32607729217215	0.0529699023718151	0.0374553771658999	5.74861334885817
1	A8	COB	2	-2.0616600004988	0.0486039958345895	0.0343682150474009	5.74861334885817
1	A8	COX1	2	-3.6672639608584	0.179487656147887	0.12691693880145	5.74861334885817
1	A8	COX2	2	-0.4108994312221	0.0733836711498887	0.0518900914984499	5.74861334885817
1	A8	COX3	2	-0.148394784630748	0.0179955289259099	0.0127247605345496	5.74861334885817
1	A8	OLI1	2	-1.4513757793449	0.0799186851505282	0.0565110442134511	5.74861334885817
1	A8	rnl	2	-3.85717793438825	0.0214415093339338	0.0151614366488992	5.74861334885817
1	A8	rns	2	0.739857288126897	0.0243972383116624	0.0172514526524007	5.74861334885817
1	A8	VAR1	2	-1.17739104452295	0.0360361855000754	0.0254814311351996	5.74861334885817
1	A9	ATP6	2	-3.9310733388267	0.00530519086601919	0.0037513364368511	5.61997778611631
1	A9	ATP8	2	-4.1170877304237	0.206122547627142	0.145750651182599	5.61997778611631
1	A9	COB	2	-3.56974489597765	0.0505797764136611	0.0357653028929992	5.61997778611631
1	A9	COX1	2	-4.87576952714035	0.350071249670345	0.24753775454035	5.61997778611631
1	A9	COX2	2	-0.965686586398397	0.234543810692005	0.16584751902565	5.61997778611631
1	A9	COX3	2	1.27209050838425	0.0216238247576181	0.0152903531213013	5.61997778611631
1	A9	OLI1	2	-0.319056295873148	0.0306048809974441	0.0216409188907	5.61997778611631
1	A9	rnl	2	-0.786243779229551	0.112337188406124	0.0794343877014008	5.61997778611631
1	A9	rns	2	0.579305636419799	0.982142270666731	0.694479459678399	5.61997778611631
1	A9	VAR1	2	0.224207817204249	0.0299898138948922	0.0212060007716008	5.61997778611631
1	B12	ATP6	2	0.268684339289052	0.00715726701949819	0.00506095204425	6.86691734454381
1	B12	ATP8	2	0.190831833073149	0.00228033792264469	0.00161244240849891	6.86691734454381
1	B12	COB	2	-0.197881608194899	0.068910794913159	0.0487272903800502	6.86691734454381
1	B12	COX1	2	-1.3760102055395	0.465086970743941	0.32886615085455	6.86691734454381
1	B12	COX2	2	-2.0783894191618	0.0815075742441415	0.0576345584660984	6.86691734454381
1	B12	COX3	2	-0.866065893076549	0.0271098667003765	0.0191695705808996	6.86691734454381
1	B12	OLI1	2	0.569696092034952	0.112304886209895	0.0794115465994007	6.86691734454381
1	B12	rnl	2	-2.0279463092024	0.543242530405333	0.38413047707855	6.86691734454381
1	B12	rns	2	1.4107736730007	0.053979159350871	0.0381690296197501	6.86691734454381
1	B12	VAR1	2	0.149446908900703	0.0732100728076499	0.0517673389334501	6.86691734454381
1	B5	ATP6	2	-4.0800279582626	0.126538960107207	0.0894765567761002	6.51064574563812
1	B5	ATP8	2	-4.355742351252	0.100210886623228	0.0708597974800007	6.51064574563812
1	B5	COB	2	-1.88269475678375	0.0809514665229876	0.0572413309254003	6.51064574563812
1	B5	COX1	2	-5.56375486430215	0.177664543502954	0.125627803487351	6.51064574563812
1	B5	COX2	2	-0.175704633358249	0.0905723454790392	0.0640443196761993	6.51064574563812
1	B5	COX3	2	0.2920551237521	0.0997416181413235	0.070527974554249	6.51064574563812
1	B5	OLI1	2	0.3854705030105	0.0842283388951652	0.05955842960085	6.51064574563812
1	B5	rnl	2	-2.2352035938129	0.0880455521554029	0.0622576069823992	6.51064574563812
1	B5	rns	2	1.1114456224235	0.000895504908801934	0.000633217593599689	6.51064574563812
1	B5	VAR1	2	0.947607870959851	0.142939108948079	0.101073213233949	6.51064574563812
1	B8	ATP8	3	-3.378373085548	0.0186672661690086	0.0107775511477115	6.35480755373049
1	B8	COB	3	-1.6918490666491	0.0331193219511385	0.0191214494438677	6.35480755373049
1	B8	COX1	3	-3.49848427288497	0.0954030061998411	0.0550809513109778	6.35480755373049
1	B8	ATP6	3	-2.5638272930918	0.0396592549283726	0.0228972815087559	6.35480755373049
1	B8	COX3	3	1.01311647870843	0.020814417884609	0.0120172097687044	6.35480755373049
1	B8	OLI1	3	-1.78287560061503	0.0251907443908597	0.0145438830551499	6.35480755373049
1	B8	rnl	3	-0.691193089052303	0.0568368253414193	0.0328147564107522	6.35480755373049
1	B8	COX2	3	-0.276394183802398	0.0384944904251101	0.0222248044092548	6.35480755373049
1	B8	VAR1	3	-1.6540159519801	0.122571032304614	0.0707664184959192	6.35480755373049
1	B8	rns	3	1.45916162986153	0.0300854163190981	0.0173698232105133	6.35480755373049
1	D1	ATP6	2	-2.75964460276185	0.0517297768160575	0.0365784759759009	5.44358792242079
1	D1	ATP8	2	-3.0591282409135	0.120642802887495	0.0853073440231	5.44358792242079
1	D1	COX1	2	-2.8943827155683	0.0628412890752304	0.0444355016435996	5.44358792242079
1	D1	COB	2	-4.87048472855595	0.0598881301469637	0.0423473029395005	5.44358792242079
1	D1	VAR1	2	-3.63946551211875	0.115783075879666	0.0818709981011487	5.44358792242079
1	D1	COX2	2	0.049872995947001	0.0221213836358652	0.0156421803781494	5.44358792242079
1	D1	COX3	2	1.6073485545081	0.00523722029866025	0.0037032739877505	5.44358792242079
1	D1	OLI1	2	-3.41820619192745	0.0135904294831173	0.00960988484674985	5.44358792242079
1	D1	rnl	2	-1.22127851228395	0.103745282949415	0.0733589930896485	5.44358792242079
1	D1	rns	2	-0.103207832429598	0.129915856466541	0.0918643830911492	5.44358792242079
15	A4	ATP6	2	-13.0573789916471	0	0	65.4687095936279
15	A4	ATP8	2	-12.9871918366972	0	0	65.4687095936279
15	A4	COB	2	-13.1124589155466	0	0	65.4687095936279
15	A4	COX1	2	-14.5466267510208	0	0	65.4687095936279
15	A4	COX2	2	-7.57676437800215	0.0296880532379752	0.0209926237647995	65.4687095936279
15	A4	COX3	2	-4.5580997406508	0.087912267026896	0.0621633601642007	65.4687095936279
15	A4	OLI1	2	-11.9912667381452	0	0	65.4687095936279
15	A4	rnl	2	-11.6832711538515	0.062606574761756	0.0442695335609002	65.4687095936279
15	A4	rns	2	-4.1696825873091	0.195553524829753	0.13827722349205	65.4687095936279
15	A4	VAR1	2	-12.9880301175893	0	0	65.4687095936279
15	A7	rnl	3	1.1526263595661	0.0300937374671989	0.0173746274276092	76.7733370040959
15	A7	rns	3	2.27264821562023	0.0520496391330378	0.0300508731646822	76.7733370040959
15	A7	ATP6	3	-6.4897580524498	0.0152458511254867	0.0088021962513247	76.7733370040959
15	A7	ATP8	3	-6.84435218733223	0.0305508088677861	0.0176385177237771	76.7733370040959
15	A7	COB	3	-13.2896980897001	0	0	76.7733370040959
15	A7	COX1	3	-7.76693559355737	0.135055628074706	0.0779744032245055	76.7733370040959
15	A7	COX2	3	2.23361434376416	0.0343969538903032	0.0198590905878697	76.7733370040959
15	A7	COX3	3	2.26944487162653	0.0126204949811953	0.00728644617469942	76.7733370040959
15	A7	OLI1	3	-13.7200198861573	0	0	76.7733370040959
15	A7	VAR1	3	-12.4305140331381	0	0	76.7733370040959
15	A8	ATP6	2	-12.4015619196607	0	0	67.7681795914193
15	A8	ATP8	2	-11.2460784592538	0	0	67.7681795914193
15	A8	COB	2	-11.5058440432925	0	0	67.7681795914193
15	A8	COX1	2	-12.4067544669124	0	0	67.7681795914193
15	A8	COX2	2	-13.572013903041	0	0	67.7681795914193
15	A8	COX3	2	-10.2974429845238	0.0181660194579022	0.0128453155458494	67.7681795914193
15	A8	OLI1	2	-8.1356607391222	0.0905522123939393	0.064030083435199	67.7681795914193
15	A8	rnl	2	-13.2673668673784	0	0	67.7681795914193
15	A8	rns	2	-10.9500129794143	0.0914162417885863	0.0646410444792984	67.7681795914193
15	A8	VAR1	2	-9.11439010487345	0.222871590561685	0.157594013019999	67.7681795914193
15	A9	ATP6	2	-13.7425542736612	0	0	66.654755692124
15	A9	ATP8	2	-12.4075100909205	0	0	66.654755692124
15	A9	COB	2	-13.0769543573786	0	0	66.654755692124
15	A9	COX1	2	-13.8671258189035	0	0	66.654755692124
15	A9	COX2	2	-14.5019158783879	0	0	66.654755692124
15	A9	COX3	2	-12.5146237740995	0	0	66.654755692124
15	A9	OLI1	2	-14.0342513795544	0	0	66.654755692124
15	A9	rnl	2	-14.8612823239398	0	0	66.654755692124
15	A9	rns	2	-13.3368989257029	0	0	66.654755692124
15	A9	VAR1	2	-8.4611419802856	0.0905300187959338	0.0640143901915504	66.654755692124
15	B12	ATP6	2	-13.0392277131695	0	0	74.1448228432934
15	B12	ATP8	2	-12.3885909441034	0	0	74.1448228432934
15	B12	COB	2	-12.3065363506585	0	0	74.1448228432934
15	B12	COX1	2	-13.8864314034209	0	0	74.1448228432934
15	B12	COX2	2	-13.6717663803619	0	0	74.1448228432934
15	B12	COX3	2	-12.186018880049	0	0	74.1448228432934
15	B12	OLI1	2	-13.9784669198032	0	0	74.1448228432934
15	B12	rnl	2	-13.3618511284806	0	0	74.1448228432934
15	B12	rns	2	-13.0439198516587	0	0	74.1448228432934
15	B12	VAR1	2	-11.1162422983384	0	0	74.1448228432934
15	B5	ATP6	2	-12.3708444285236	0	0	78.6457734522367
15	B5	ATP8	2	-12.3972412427447	0	0	78.6457734522367
15	B5	COB	2	-12.5912304158026	0	0	78.6457734522367
15	B5	COX1	2	-13.460279100245	0	0	78.6457734522367
15	B5	COX2	2	-14.6434183270638	0	0	78.6457734522367
15	B5	COX3	2	-13.1351199798321	0	0	78.6457734522367
15	B5	OLI1	2	-14.4523908911159	0	0	78.6457734522367
15	B5	rnl	2	-14.361058023597	0	0	78.6457734522367
15	B5	rns	2	-1.3638766716411	0.110154796919777	0.077891203882201	78.6457734522367
15	B5	VAR1	2	-11.4550453588528	0	0	78.6457734522367
15	B8	ATP6	2	-13.4349772952432	0	0	68.4415700881731
15	B8	ATP8	2	-12.7487194870167	0	0	68.4415700881731
15	B8	COB	2	-12.6535653495524	0	0	68.4415700881731
15	B8	COX1	2	-14.0929701045038	0	0	68.4415700881731
15	B8	COX2	2	-14.2750947725847	0	0	68.4415700881731
15	B8	COX3	2	-3.57189225745165	0.0330298708621602	0.0233556456683495	68.4415700881731
15	B8	OLI1	2	-14.1938043136184	0	0	68.4415700881731
15	B8	rnl	2	-13.7037116010211	0	0	68.4415700881731
15	B8	rns	2	-2.30539081408195	0.0160432005018604	0.0113442558668009	68.4415700881731
15	B8	VAR1	2	-11.442934949411	0	0	68.4415700881731
15	D1	ATP6	2	-12.5802875394564	0.363281357739633	0.25687871153635	69.7089979986326
15	D1	ATP8	2	-12.0001177967875	0	0	69.7089979986326
15	D1	COX1	2	-12.1292393234499	0.0109496828976914	0.00774259502879992	69.7089979986326
15	D1	COB	2	-12.3532454396762	0.199093422816517	0.140780309363199	69.7089979986326
15	D1	VAR1	2	-10.6106629084178	0	0	69.7089979986326
15	D1	COX2	2	0.748883723440303	0.0753159030590588	0.0532563857842491	69.7089979986326
15	D1	COX3	2	0.533256497083503	0.0788234088529337	0.0557365669161492	69.7089979986326
15	D1	OLI1	2	-11.8715404504532	0.106211325359198	0.0751027484002993	69.7089979986326
15	D1	rnl	2	-12.007332768405	0.115019636066808	0.0813311646324486	69.7089979986326
15	D1	rns	2	0.299588482997803	0.135707918893914	0.0959599897106003	69.7089979986326
2	A4	ATP6	2	-2.0009120011205	0.0728570063322014	0.0515176832344508	9.0457764849023
2	A4	ATP8	2	-1.3269226169386	0.195517482003861	0.138251737365449	9.0457764849023
2	A4	COB	2	-1.8013590589241	0.612219907836439	0.432904848408549	9.0457764849023
2	A4	COX1	2	-3.851786577579	0.599658179262439	0.424022364950449	9.0457764849023
2	A4	COX2	2	-0.492491023485249	0.0691187191551721	0.0488743150215507	9.0457764849023
2	A4	COX3	2	0.583329639678151	0.0377269610360499	0.0266769899821516	9.0457764849023
2	A4	OLI1	2	-3.72000153246235	0.0431930141642817	0.0305420732154502	9.0457764849023
2	A4	rnl	2	-2.3953110792794	9.79743353384569e-05	6.92783169000677e-05	9.0457764849023
2	A4	rns	2	1.0883983931193	0.180356843264814	0.127531546905949	9.0457764849023
2	A4	VAR1	2	-3.46003995093965	0.304495041778984	0.2153105088796	9.0457764849023
2	A7	ATP6	3	-1.33206509168007	0.0586927546004663	0.0338862776680599	9.65386110732963
2	A7	ATP8	3	-5.03198078554697	6.02404798194206	3.47798572398547	9.65386110732963
2	A7	COB	3	-0.254902192417434	0.0758693198210585	0.0438031722219219	9.65386110732963
2	A7	VAR1	3	0.354967165089431	0.0467443967161883	0.026987890027198	9.65386110732963
2	A7	COX2	3	0.122981657631168	0.0234204646011437	0.0135218115420164	9.65386110732963
2	A7	COX3	3	0.505972850678467	0.0408203370116008	0.023567632562059	9.65386110732963
2	A7	OLI1	3	-0.350435063709035	0.0544608112187166	0.0314429640174114	9.65386110732963
2	A7	COX1	3	-0.94451611276323	1.44367422651289	0.833505703299341	9.65386110732963
2	A7	rns	3	2.0153366825575	0.0184774987088992	0.0106679888535339	9.65386110732963
2	A7	rnl	3	-0.0764991049877688	0.0604845452733876	0.0349207684954025	9.65386110732963
2	A8	ATP6	2	-2.03132881630805	0.0696773204013468	0.0492693057507001	9.64993090204776
2	A8	ATP8	2	-5.0019501503376	0.0943020678622352	0.0666816316653005	9.64993090204776
2	A8	COB	2	-1.86970056141985	0.0610143383827468	0.0431436524200509	9.64993090204776
2	A8	COX1	2	-4.71292491160755	0.415110613481817	0.293527529735501	9.64993090204776
2	A8	COX2	2	0.690499018187152	0.0274242794357881	0.0193918939582006	9.64993090204776
2	A8	COX3	2	0.978858496269204	0.311785176145111	0.22046541232565	9.64993090204776
2	A8	OLI1	2	-1.26660853565905	0.116501489189884	0.0823789930244985	9.64993090204776
2	A8	rnl	2	-2.03360570250225	0.0318862905244878	0.0225470122567497	9.64993090204776
2	A8	rns	2	0.783456084222749	0.0224759110396753	0.0158928691095	9.64993090204776
2	A8	VAR1	2	-0.984295811836098	0.0068850006360162	0.00486843063820075	9.64993090204776
2	A9	ATP6	2	-0.773454613133954	0.189778157142716	0.1341934218367	9.27106474208416
2	A9	ATP8	2	-1.52944598643635	0.0208844729102577	0.01476755241635	9.27106474208416
2	A9	COB	2	-1.5110747092185	0.0576883202477553	0.040791802442449	9.27106474208416
2	A9	COX1	2	-2.73296085287155	0.0125117905960474	0.0088471719752512	9.27106474208416
2	A9	COX2	2	-1.78555305126265	0.0298630587494389	0.0211163713487005	9.27106474208416
2	A9	COX3	2	-0.447283105734648	0.0180881764099881	0.0127902721988011	9.27106474208416
2	A9	OLI1	2	0.202353866069401	0.0753616481830072	0.0532887324715993	9.27106474208416
2	A9	rnl	2	-2.6197058845622	0.0306811131482063	0.0216948231614484	9.27106474208416
2	A9	rns	2	-0.622317522076452	1.37650562387411	0.9733364609828	9.27106474208416
2	A9	VAR1	2	-0.247085676222651	0.0449474939756173	0.0317826777875005	9.27106474208416
2	B12	ATP6	2	-1.13172874753975	0.0128818585609734	0.00910884954275026	11.0012812558727
2	B12	ATP8	2	-1.332125284861	0.0662977188947093	0.0468795666076485	11.0012812558727
2	B12	COB	2	-3.1224560553838	0.0514814991810223	0.0364029171765505	11.0012812558727
2	B12	COX1	2	-2.7659228824312	0.0871394039343031	0.0616168634304994	11.0012812558727
2	B12	COX2	2	-0.614248991070303	0.0709809160017215	0.05019108703965	11.0012812558727
2	B12	COX3	2	0.603157454224853	0.0316945404341081	0.0224114244675491	11.0012812558727
2	B12	OLI1	2	-0.713557216447001	0.020759215557045	0.0146789820924998	11.0012812558727
2	B12	rnl	2	-1.81109777677305	0.150183716218645	0.106195924162	11.0012812558727
2	B12	rns	2	1.18052128587775	0.0165787740668798	0.0117229635664504	11.0012812558727
2	B12	VAR1	2	-0.6716175675577	0.22630292782086	0.1600203348645	11.0012812558727
2	B5	ATP6	2	-5.03666938762735	0.064301625863286	0.0454681156892498	10.7463816251376
2	B5	ATP8	2	-5.1709981227447	0.0392511470979347	0.0277547522823003	10.7463816251376
2	B5	COB	2	-0.419277677488646	0.0778630683561152	0.0550575036386008	10.7463816251376
2	B5	COX1	2	-5.99070923216105	0.0617579462581608	0.0436694625912999	10.7463816251376
2	B5	COX2	2	-1.26474168536545	0.114637932475739	0.0810612594348008	10.7463816251376
2	B5	COX3	2	-0.9254858820688	0.00659772056898004	0.00466529295469975	10.7463816251376
2	B5	OLI1	2	-0.355535780979349	0.13260058052698	0.0937627696799001	10.7463816251376
2	B5	rnl	2	-2.5290872251882	0.114591249592714	0.0810282496516486	10.7463816251376
2	B5	rns	2	0.279923594021048	0.11722873359905	0.0828932324777992	10.7463816251376
2	B5	VAR1	2	1.13297680374805	0.181924840438862	0.1286402883406	10.7463816251376
2	B8	COB	3	-1.66859725211077	0.0518230702331696	0.0299200635493534	10.4442314968852
2	B8	COX1	3	-3.9718960392015	0.0548395929845147	0.0316616537718591	10.4442314968852
2	B8	ATP8	3	-3.6515900986489	0.0503338674900966	0.0290602719447622	10.4442314968852
2	B8	ATP6	3	-3.43369029860083	0.609740676935106	0.352033943964348	10.4442314968852
2	B8	OLI1	3	-1.40318353800897	0.0279296266916403	0.0161251774887843	10.4442314968852
2	B8	rnl	3	-1.38905905603787	0.0544554598742913	0.0314398744172669	10.4442314968852
2	B8	COX2	3	-1.2299820548176	0.0383169378366216	0.0221222943744957	10.4442314968852
2	B8	COX3	3	0.949436238490268	0.0301297552751684	0.017395422318736	10.4442314968852
2	B8	rns	3	1.52373258900453	0.091117357927554	0.0526066311273208	10.4442314968852
2	B8	VAR1	3	-0.884279747945636	0.0719969656739035	0.0415674675126644	10.4442314968852
2	D1	ATP6	2	-10.9112789987267	0.0864194494092669	0.0611077787037004	9.37736094917997
2	D1	ATP8	2	-11.3608120398925	0.0245399901492716	0.017352393444801	9.37736094917997
2	D1	COX1	2	-10.7547415999741	0.152019661705863	0.107494133665901	9.37736094917997
2	D1	COB	2	-1.76779531400995	0.108406490490688	0.0766549645506007	9.37736094917997
2	D1	VAR1	2	-3.51448966318065	0.473995791414039	0.335165638362751	9.37736094917997
2	D1	COX2	2	0.869943505689749	0.0744004074716551	0.0526090326462496	9.37736094917997
2	D1	COX3	2	1.008962098116	0.0694018519718498	0.0490745201562	9.37736094917997
2	D1	OLI1	2	-2.9754261262596	0.0361991177204504	0.0255966416131006	9.37736094917997
2	D1	rnl	2	-2.8473192061704	0.0233329716065152	0.0164989024482001	9.37736094917997
2	D1	rns	2	1.0460613157366	0.0365678777660142	0.0258573943419494	9.37736094917997
3	A4	ATP6	2	-2.4712518462023	0.0964760868295966	0.0682188952195499	13.123044304137
3	A4	ATP8	2	-1.9158135718937	0.0304371562217737	0.0215223195644505	13.123044304137
3	A4	COB	2	-1.36433832067615	0.0493697841018029	0.0349097091241006	13.123044304137
3	A4	COX1	2	-2.89190270000525	0.117869370476397	0.0833462311580497	13.123044304137
3	A4	COX2	2	0.157876360754452	0.0039763622564647	0.00281171271600043	13.123044304137
3	A4	COX3	2	1.22661691541455	0.0362924687575307	0.0256626507644508	13.123044304137
3	A4	OLI1	2	-6.80218529068475	0.105415413331521	0.0745399536083013	13.123044304137
3	A4	rnl	2	-3.48256718846375	0.0102963007340743	0.00728058407019994	13.123044304137
3	A4	rns	2	1.77711287232185	0.232668382142125	0.1645213907804	13.123044304137
3	A4	VAR1	2	-9.39036786585725	0.0644781215305177	0.0455929169723994	13.123044304137
3	A7	ATP8	3	-1.606346171501	0.00421657902895138	0.00243444303742441	13.6841077246164
3	A7	COB	3	-1.4902097457429	0.0263346355850454	0.0152043089440367	13.6841077246164
3	A7	ATP6	3	-1.52749720364746	0.0422061956216495	0.0243677584036293	13.6841077246164
3	A7	COX2	3	-0.402502490580534	0.0405919161410613	0.0234357537109645	13.6841077246164
3	A7	COX3	3	0.565104154927767	0.0260929257294212	0.0150647576938262	13.6841077246164
3	A7	OLI1	3	-0.690421159062831	0.0698419482527351	0.0403232676244445	13.6841077246164
3	A7	COX1	3	-2.0196682915756	0.202075575256789	0.116668387771156	13.6841077246164
3	A7	rns	3	1.9410703929859	0.0446970424843441	0.0258058495103162	13.6841077246164
3	A7	VAR1	3	-0.356642923840633	0.040896252772285	0.0236114625469257	13.6841077246164
3	A7	rnl	3	-1.0467802027216	0.00530599163900268	0.0030634157010961	13.6841077246164
3	A8	ATP6	2	-4.0125662918125	0.00718926426786447	0.00508357751554911	13.8354893794195
3	A8	ATP8	2	-6.01895175896205	0.0842214875437435	0.0595535849637994	13.8354893794195
3	A8	COB	2	-0.508112282248851	0.17499209883543	0.123738099740599	13.8354893794195
3	A8	COX1	2	-6.60921119607725	0.535835358998758	0.37889281594755	13.8354893794195
3	A8	COX2	2	-0.258692867570248	0.0170715468946468	0.0120714065745489	13.8354893794195
3	A8	COX3	2	-0.0188404944715988	0.0861081955081502	0.06088768895955	13.8354893794195
3	A8	OLI1	2	-1.01439021548785	0.0694589506499065	0.0491148950186506	13.8354893794195
3	A8	rnl	2	-1.84882561684325	0.0599197229470114	0.042369642422651	13.8354893794195
3	A8	rns	2	0.0848735288514478	0.0880385032273872	0.0622526226375992	13.8354893794195
3	A8	VAR1	2	-0.654252931018297	0.447226507257779	0.31623689600835	13.8354893794195
3	A9	ATP6	2	-1.34208088067121	0.0692760065327767	0.04898553399285	13.1638407361613
3	A9	ATP8	2	-2.4011524517477	0.49779553138713	0.3519945958882	13.1638407361613
3	A9	COB	2	-2.96713740436485	0.285763772710435	0.202065501501	13.1638407361613
3	A9	COX1	2	-2.54766897219805	0.261883513521061	0.185179608291701	13.1638407361613
3	A9	COX2	2	-3.01625585794764	0.069369996501079	0.0490519949368	13.1638407361613
3	A9	COX3	2	-1.5864633801403	0.923690964534378	0.653148144743001	13.1638407361613
3	A9	OLI1	2	0.680838188436852	0.121854517499272	0.0861641556419501	13.1638407361613
3	A9	rnl	2	-4.4796701145629	0.144708514330817	0.102324371778751	13.1638407361613
3	A9	rns	2	-0.343469619424148	0.529221288364826	0.37421596175105	13.1638407361613
3	A9	VAR1	2	-0.169445468969601	0.00376282873201315	0.00266072171285007	13.1638407361613
3	B12	ATP6	2	-1.3221532707006	0.0618606647203278	0.0437420955124512	15.2728139363103
3	B12	ATP8	2	-2.24922179594075	0.862481451227954	0.609866482810901	15.2728139363103
3	B12	COB	2	-2.2672976056778	0.148000241635274	0.10465197447755	15.2728139363103
3	B12	COX1	2	-3.85452070075095	0.0458920429590535	0.032450574778851	15.2728139363103
3	B12	COX2	2	-0.670971177901855	0.0248697826917897	0.0175855919880003	15.2728139363103
3	B12	COX3	2	0.186230992442052	0.0771096107208247	0.0545247286353501	15.2728139363103
3	B12	OLI1	2	0.0506988580076007	0.282868709071793	0.20001838237015	15.2728139363103
3	B12	rnl	2	-1.64134423529545	0.0863691563012154	0.0610722161059503	15.2728139363103
3	B12	rns	2	0.767610255610798	0.0178627114976976	0.0126308444304009	15.2728139363103
3	B12	VAR1	2	0.247339246281952	0.15487195573077	0.10951101011285	15.2728139363103
3	B5	ATP6	2	-3.73208099622175	0.00608986352566902	0.00430618379550118	15.1372530894499
3	B5	ATP8	2	-3.94816194461275	0.0760391047320699	0.0537677665914007	15.1372530894499
3	B5	COB	2	0.0932308800213999	0.00692675633060851	0.00489795637300013	15.1372530894499
3	B5	COX1	2	-5.15089196951281	0.148632087018726	0.10509875663285	15.1372530894499
3	B5	COX2	2	-1.88801751464095	0.0162092628841248	0.0114616797034001	15.1372530894499
3	B5	COX3	2	-1.23168255761215	0.099059628758418	0.0700457352368993	15.1372530894499
3	B5	OLI1	2	-0.493236432516702	0.00606379273305098	0.00428774896125006	15.1372530894499
3	B5	rnl	2	-4.54985777363095	0.0562385073072987	0.0397666298808001	15.1372530894499
3	B5	rns	2	1.0911662378988	0.0451466971974623	0.0319235357365013	15.1372530894499
3	B5	VAR1	2	0.285242694124301	0.129269258951547	0.0914071696035989	15.1372530894499
3	B8	COX3	3	0.773608304741133	0.0776899449384035	0.0448543106235145	14.9944844643858
3	B8	OLI1	3	-4.82686475601017	6.85852874247506	3.95977341571276	14.9944844643858
3	B8	ATP6	3	-5.95188007720853	5.23063641743236	3.01990934363763	14.9944844643858
3	B8	ATP8	3	-3.82126101543493	0.0680992958234221	0.0393171467752767	14.9944844643858
3	B8	COB	3	-2.0198815388761	0.2577273119753	0.148798932946458	14.9944844643858
3	B8	COX1	3	-4.2115135458849	0.225727394519723	0.130323771989435	14.9944844643858
3	B8	COX2	3	-1.69378065796706	0.063607526169789	0.0367238223566138	14.9944844643858
3	B8	VAR1	3	-1.527965856703	2.18917606058532	1.26392138788242	14.9944844643858
3	B8	rnl	3	-1.73495526824103	0.0605922818398081	0.0349829702310269	14.9944844643858
3	B8	rns	3	1.7182625128393	0.18175442952505	0.104935968812694	14.9944844643858
3	D1	ATP6	2	-10.6581994098731	0.136652035724159	0.0966275811234993	13.6235610022187
3	D1	ATP8	2	-11.1721917509026	0.135570583667914	0.0958628790410003	13.6235610022187
3	D1	COX1	2	-10.6118935518736	0.00781405276608778	0.00552536969945017	13.6235610022187
3	D1	COB	2	-2.86400918875245	0.106790216698018	0.0755120863915497	13.6235610022187
3	D1	VAR1	2	-5.00972718711715	0.373619525841884	0.264188900306499	13.6235610022187
3	D1	COX2	2	1.0182798509807	0.0703471141407095	0.0497429214457997	13.6235610022187
3	D1	COX3	2	1.42625281983495	0.10828639145712	0.0765700417095507	13.6235610022187
3	D1	OLI1	2	-4.2159527015601	0.02488578526672	0.01759690751725	13.6235610022187
3	D1	rnl	2	-2.07524072688925	0.277554536567756	0.19626069495615	13.6235610022187
3	D1	rns	2	0.702398112064701	0.0620566730378651	0.0438806943229508	13.6235610022187
4	A4	ATP6	2	-3.06954368119376	0.120993044076858	0.085555001943149	17.4842064247672
4	A4	ATP8	2	-3.28095671462525	0.0573607688619376	0.0405601886363502	17.4842064247672
4	A4	COB	2	-4.64096690530485	0.0644691721444172	0.0455865888008002	17.4842064247672
4	A4	COX1	2	-3.6812156098201	0.257299132871208	0.18193796164665	17.4842064247672
4	A4	COX2	2	0.148005968473353	0.161530206832957	0.11421910461805	17.4842064247672
4	A4	COX3	2	0.791135647033748	0.210399332805863	0.148774794984151	17.4842064247672
4	A4	OLI1	2	-5.83821047682175	0.229331706667677	0.162162004925799	17.4842064247672
4	A4	rnl	2	-3.54934843356215	0.907278042143468	0.6415424560213	17.4842064247672
4	A4	rns	2	0.641346097238598	0.39999147460917	0.282836684112951	17.4842064247672
4	A4	VAR1	2	-9.14283588596255	0.159786121392312	0.112985849976001	17.4842064247672
4	A7	COX3	3	0.355593317460965	0.0398188547657191	0.0229894265178105	18.1810589124911
4	A7	COX1	3	-2.36396239867283	0.18249081758721	0.105361122658611	18.1810589124911
4	A7	COX2	3	-1.23817020521763	0.0238824912624404	0.0137885627592889	18.1810589124911
4	A7	ATP6	3	-1.4889553012791	0.0354444335429505	0.0204638532472963	18.1810589124911
4	A7	ATP8	3	-1.91538128109453	0.0607802027054381	0.0350914663933847	18.1810589124911
4	A7	COB	3	-1.5319955527904	0.0342133122803626	0.0197530650549361	18.1810589124911
4	A7	rnl	3	-0.21874753510597	0.0280749603181327	0.016209085897162	18.1810589124911
4	A7	rns	3	0.844954708258032	0.0502940495816938	0.0290372830646273	18.1810589124911
4	A7	VAR1	3	0.214550908490267	0.0664009960258825	0.0383366329300025	18.1810589124911
4	A7	OLI1	3	-0.253263509939097	0.0533283825411783	0.0307891560155966	18.1810589124911
4	A8	ATP6	2	-3.4387318573688	0.00382939028558891	0.00270778783874981	18.3054564631656
4	A8	ATP8	2	-3.73612020523335	0.046298893913254	0.0327382618474985	18.3054564631656
4	A8	COB	2	-0.203849492321002	0.629871772726004	0.445386601772549	18.3054564631656
4	A8	COX1	2	-3.92020233781185	0.138616146615545	0.0980164172538007	18.3054564631656
4	A8	COX2	2	-1.47170829222925	0.576625247778215	0.407735622907349	18.3054564631656
4	A8	COX3	2	-1.58513935247499	0.103219906455394	0.0729874958080501	18.3054564631656
4	A8	OLI1	2	-1.6828512167872	0.112662374587782	0.0796643290555998	18.3054564631656
4	A8	rnl	2	-2.89912650408535	0.0271750628789837	0.0192156712409002	18.3054564631656
4	A8	rns	2	-0.518332956393104	0.0152450966386043	0.0107799112130014	18.3054564631656
4	A8	VAR1	2	-2.0630648578968	0.265514032198723	0.1877467726679	18.3054564631656
4	A9	ATP6	2	-2.97602174711766	0.0602053029546157	0.0425715779825993	17.363490311584
4	A9	ATP8	2	-4.84511633925359	0.0408787920302436	0.0289056710512998	17.363490311584
4	A9	COB	2	-2.6035094050273	0.125256393198531	0.0885696450176496	17.363490311584
4	A9	COX1	2	-4.9645440611301	0.0984655662125276	0.0696256695822512	17.363490311584
4	A9	COX2	2	-3.0532695184885	0.168846255274989	0.119392332082899	17.363490311584
4	A9	COX3	2	-1.5365937903716	1.15876784744083	0.81937260274635	17.363490311584
4	A9	OLI1	2	1.33329762492235	0.131266797584652	0.0928196427167496	17.363490311584
4	A9	rnl	2	-5.01780445035365	0.874464638632805	0.6183398758851	17.363490311584
4	A9	rns	2	1.97488990738385	1.23297146219531	0.8718424819278	17.363490311584
4	A9	VAR1	2	1.6501671474791	0.163239479310549	0.11542774277785	17.363490311584
4	B12	ATP6	2	-0.96349345516975	0.0610269201575029	0.0431525490783003	20.1855407545087
4	B12	ATP8	2	-5.59925033264415	0.199363549817676	0.140971317997501	20.1855407545087
4	B12	COB	2	-1.12463331936015	0.0925357296113058	0.0654326419101992	20.1855407545087
4	B12	COX1	2	-7.74688023859515	0.259687500732872	0.1836267927576	20.1855407545087
4	B12	COX2	2	-3.8064507287373	0.0191391248492068	0.0135334049668501	20.1855407545087
4	B12	COX3	2	-2.27335695140935	0.131582766271554	0.0930430663179003	20.1855407545087
4	B12	OLI1	2	1.3162276260827	0.000627763355635394	0.00044389572575021	20.1855407545087
4	B12	rnl	2	-1.85361040732395	0.122525030618738	0.0866382800155989	20.1855407545087
4	B12	rns	2	-1.44792463481575	0.179724027486484	0.12708407857785	20.1855407545087
4	B12	VAR1	2	1.07249963199895	0.241640767964044	0.170865825638501	20.1855407545087
4	B5	ATP6	2	-11.4320738993459	0.025327316417257	0.0179091171878998	19.7296033239137
4	B5	ATP8	2	-11.9052562205433	0.0201921704204141	0.0142780206311492	19.7296033239137
4	B5	COB	2	-1.8335882621452	0.0516726748117712	0.0365380987614507	19.7296033239137
4	B5	COX1	2	-13.5347597347739	0.0127157638256728	0.00899140282909983	19.7296033239137
4	B5	COX2	2	-2.15068380276565	0.106362693114321	0.0752097815664001	19.7296033239137
4	B5	COX3	2	-1.60438942319665	0.0568260725270866	0.0401821012321015	19.7296033239137
4	B5	OLI1	2	-1.07341737738	0.143626285047684	0.10155912011385	19.7296033239137
4	B5	rnl	2	-9.2826016709152	0.0750790102103322	0.0530888772445	19.7296033239137
4	B5	rns	2	1.08484574815815	0.078108201763559	0.0552308391332996	19.7296033239137
4	B5	VAR1	2	-0.223731653399847	0.270296649610234	0.191128593871401	19.7296033239137
4	B8	ATP6	2	-2.62085714444095	0.115813948916359	0.08189282863475	19.6065663773476
4	B8	ATP8	2	-2.318677753927	0.480990763679967	0.340111830686201	19.6065663773476
4	B8	COB	2	-4.5463423950197	0.128359518044567	0.0907638856391504	19.6065663773476
4	B8	COX1	2	-4.38730826910665	0.330379761588752	0.233613769786201	19.6065663773476
4	B8	COX2	2	-7.29329769640405	0.0615405743312619	0.04351575742775	19.6065663773476
4	B8	COX3	2	0.858352703776152	0.114413144475001	0.0809023103151496	19.6065663773476
4	B8	OLI1	2	-3.57793143029065	0.0765853963005809	0.0541540530639999	19.6065663773476
4	B8	rnl	2	-9.8696597330464	0.187835548818348	0.132819790317351	19.6065663773476
4	B8	rns	2	2.1508053200205	0.075334003052075	0.0532691844120503	19.6065663773476
4	B8	VAR1	2	-3.9237449761251	0.160886636975043	0.113764032007351	19.6065663773476
4	D1	ATP6	2	-12.0193697219555	0	0	18.1391759816157
4	D1	ATP8	2	-11.1803927994496	0	0	18.1391759816157
4	D1	COX1	2	-12.1916921028543	0	0	18.1391759816157
4	D1	COB	2	-4.86764997999415	0.0515245496774393	0.0364333584745005	18.1391759816157
4	D1	VAR1	2	-7.34657663759415	0.118436691425472	0.0837473876482502	18.1391759816157
4	D1	COX2	2	0.256075625263348	0.0078203295103768	0.00552980802790071	18.1391759816157
4	D1	COX3	2	0.779932933003698	0.0952175175857737	0.0673289523726499	18.1391759816157
4	D1	OLI1	2	-7.22887904398395	0.0788207249324132	0.0557346690977489	18.1391759816157
4	D1	rnl	2	-1.8001802542923	0.134611425727566	0.0951846519571511	18.1391759816157
4	D1	rns	2	-0.66450779453835	0.196361036228444	0.13884822027795	18.1391759816157
5	A4	ATP6	2	-3.25945360951585	0.0546085257006067	0.0386140588334989	21.7931780085076
5	A4	ATP8	2	-3.78552998161775	0.258309383522959	0.182652316733201	21.7931780085076
5	A4	COB	2	-4.49678145382605	0.806407751170707	0.570216389254201	21.7931780085076
5	A4	COX1	2	-4.4259721642182	0.702920937373845	0.49704016145505	21.7931780085076
5	A4	COX2	2	-1.18343219224335	0.578242444640028	0.40887915377485	21.7931780085076
5	A4	COX3	2	-0.0669267025901999	0.0602029403100416	0.0425699073405994	21.7931780085076
5	A4	OLI1	2	-7.43233406022465	0.291002310206547	0.205769706888001	21.7931780085076
5	A4	rnl	2	-3.977002573343	0.18270142512566	0.1291894166388	21.7931780085076
5	A4	rns	2	0.851743784996549	0.313699941681128	0.22181935602055	21.7931780085076
5	A4	VAR1	2	-12.0986528517582	0.211411511903832	0.1494905136881	21.7931780085076
5	A7	OLI1	3	-1.7577656510984	0.0504613566790304	0.0291338778623119	22.812567640267
5	A7	rnl	3	0.572994627604568	0.0300436863125946	0.0173457303800252	22.812567640267
5	A7	rns	3	2.12854185742226	0.102856356901646	0.0593841453450295	22.812567640267
5	A7	ATP6	3	-1.31889340470276	0.0355720951231602	0.0205375586949955	22.812567640267
5	A7	ATP8	3	-1.76805658603383	0.0851349867790361	0.0491527075343317	22.812567640267
5	A7	COB	3	-3.42141888801773	0.092380052179	0.0533356479932974	22.812567640267
5	A7	COX1	3	-2.21982523027807	0.10070737071381	0.0581434275909977	22.812567640267
5	A7	COX2	3	1.70771689538457	0.0780613958739012	0.0450687679211148	22.812567640267
5	A7	COX3	3	1.887721037347	0.109410578286048	0.0631682268256422	22.812567640267
5	A7	VAR1	3	-1.3547031062117	0.161071685097077	0.0929947807496238	22.812567640267
5	A8	ATP6	2	-2.6321032183054	0.113814333321985	0.0804788868882014	22.5039040496505
5	A8	ATP8	2	-4.5271826021613	0.154039652481375	0.1089224828412	22.5039040496505
5	A8	COB	2	-2.92613171596245	0.161678221213861	0.1143237665905	22.5039040496505
5	A8	COX1	2	-4.73974610446915	0.333483514134536	0.23580845425845	22.5039040496505
5	A8	COX2	2	-0.0896807503226001	0.160478632299969	0.113475529134851	22.5039040496505
5	A8	COX3	2	-0.159688909107649	0.014369263208522	0.0101606034554003	22.5039040496505
5	A8	OLI1	2	-1.22189391495021	0.153034937748818	0.10821204224065	22.5039040496505
5	A8	rnl	2	-1.71008199156295	0.126851930351642	0.0896978601582496	22.5039040496505
5	A8	rns	2	0.267618083159698	0.135984220561565	0.0961553644934501	22.5039040496505
5	A8	VAR1	2	-1.3838170648511	0.439395254409717	0.310699364014299	22.5039040496505
5	A9	ATP6	2	-2.83213933112056	0.133866821386241	0.094658137178099	21.4507371105611
5	A9	ATP8	2	-4.76408025097095	0.0481374985818018	0.0340383516765499	21.4507371105611
5	A9	COB	2	-2.1688677514555	0.192969824882503	0.136450271738799	21.4507371105611
5	A9	COX1	2	-5.8989289720435	0.326341162697351	0.230758049123599	21.4507371105611
5	A9	COX2	2	-2.31224584898645	0.068409334180093	0.0483727040952004	21.4507371105611
5	A9	COX3	2	-1.50359849815765	0.311337761497256	0.22014904239415	21.4507371105611
5	A9	OLI1	2	-1.19727797314795	0.0793872510784774	0.0561352635773504	21.4507371105611
5	A9	rnl	2	-7.1186720462806	0.184257648960203	0.13028983306525	21.4507371105611
5	A9	rns	2	0.887546578918247	0.276823235362961	0.19574358691515	21.4507371105611
5	A9	VAR1	2	0.463031814158647	0.0671700667236558	0.0474964096730499	21.4507371105611
5	B12	ATP6	2	-1.470530538675	0.0789024870285202	0.0557924836303503	24.4021923397359
5	B12	ATP8	2	-3.8614943268531	0.059112051298336	0.0417985323229004	24.4021923397359
5	B12	COB	2	-0.993367227367099	0.108367612477306	0.0766274736436986	24.4021923397359
5	B12	COX1	2	-6.0622995815343	0.0627202519189233	0.0443499154495992	24.4021923397359
5	B12	COX2	2	-3.077299466111	0.116240080136166	0.0821941489099505	24.4021923397359
5	B12	COX3	2	-2.01799525373205	0.245792757367856	0.173801725501351	24.4021923397359
5	B12	OLI1	2	0.848375670859352	0.0400270457634527	0.0283033954902017	24.4021923397359
5	B12	rnl	2	-1.5783294085523	0.0948352755115324	0.0670586664098991	24.4021923397359
5	B12	rns	2	-1.09120363509	0.123001761762209	0.0869753798399504	24.4021923397359
5	B12	VAR1	2	0.823248316425055	0.316364802737597	0.223703697344499	24.4021923397359
5	B5	ATP6	2	-12.5805865721767	0	0	24.1071417969413
5	B5	ATP8	2	-9.0508298579517	0	0	24.1071417969413
5	B5	COB	2	-1.86966079621005	0.0673176469894348	0.0476007646797515	24.1071417969413
5	B5	COX1	2	-13.2189569943844	0	0	24.1071417969413
5	B5	COX2	2	-1.2585547157425	0.0377230701215875	0.0266742386901502	24.1071417969413
5	B5	COX3	2	-0.807203790591799	0.138771818458509	0.0981264938696	24.1071417969413
5	B5	OLI1	2	-1.62576437591565	0.614451636336204	0.4344829187645	24.1071417969413
5	B5	rnl	2	-7.70478996344765	0.136537663926855	0.0965467080500488	24.1071417969413
5	B5	rns	2	1.18542465945485	0.0774985844017714	0.0547997745628506	24.1071417969413
5	B5	VAR1	2	-0.445006204098098	0.0183391355643475	0.0129677271186495	24.1071417969413
5	B8	ATP6	2	-3.3770647967581	0.0684091240428072	0.0483725555057006	23.8655552903888
5	B8	ATP8	2	-4.2156926672444	0.0878762354869218	0.0621378820179483	23.8655552903888
5	B8	COB	2	-5.83637625052995	0.10612356956191	0.0750406956809488	23.8655552903888
5	B8	COX1	2	-5.53422506548285	0.0698535698405621	0.0493939329243496	23.8655552903888
5	B8	COX2	2	-9.1562990590177	0.0261042062497626	0.0184584612566994	23.8655552903888
5	B8	COX3	2	1.0688623568552	0.00646865217665359	0.00457402781924887	23.8655552903888
5	B8	OLI1	2	-4.15217671235275	0.0285698900190155	0.0202019629701997	23.8655552903888
5	B8	rnl	2	-11.5405797951861	0.0199891337912653	0.0141344520538489	23.8655552903888
5	B8	rns	2	2.34178039135225	0.122556330776352	0.0866604125692998	23.8655552903888
5	B8	VAR1	2	-4.55227797962345	0.280252437872846	0.198168399263951	23.8655552903888
5	D1	ATP6	2	-12.3597444741095	0	0	22.4462081462622
5	D1	ATP8	2	-11.5207675516035	0	0	22.4462081462622
5	D1	COX1	2	-12.5320668550082	0	0	22.4462081462622
5	D1	COB	2	-8.2280742310026	0.0425121829150153	0.0300606528222502	22.4462081462622
5	D1	VAR1	2	-7.41801730347605	0.00609067452545637	0.00430675725895036	22.4462081462622
5	D1	COX2	2	0.333703929160151	0.00737860513859677	0.00521746172919968	22.4462081462622
5	D1	COX3	2	0.623754059236852	0.0921743388516672	0.0651771000534005	22.4462081462622
5	D1	OLI1	2	-7.2887683075064	0.249043949775165	0.176100665699501	22.4462081462622
5	D1	rnl	2	-2.65614338078565	0.130547376106405	0.0923109349109499	22.4462081462622
5	D1	rns	2	-0.1473258631486	0.28707030058477	0.202989356220751	22.4462081462622
50	A4	ATP6	2	-15.1378755510488	0	0	222.146291481043
50	A4	ATP8	2	-13.5780183699436	0	0	222.146291481043
50	A4	COB	2	-14.0815876058743	0	0	222.146291481043
50	A4	COX1	2	-15.1464776842801	0	0	222.146291481043
50	A4	COX2	2	-15.5585953392662	0	0	222.146291481043
50	A4	COX3	2	-13.4801064518807	0	0	222.146291481043
50	A4	OLI1	2	-13.5488090222708	0	0	222.146291481043
50	A4	rnl	2	-14.9300168877777	0	0	222.146291481043
50	A4	rns	2	-12.1068125398224	0	0	222.146291481043
50	A4	VAR1	2	-13.455279173868	0	0	222.146291481043
50	A7	ATP6	3	-11.3848642692146	0	0	264.45948968389
50	A7	ATP8	3	-10.3586504449221	0	0	264.45948968389
50	A7	COB	3	-11.3207685589886	0	0	264.45948968389
50	A7	VAR1	3	-10.4205951597822	0	0	264.45948968389
50	A7	COX2	3	1.1056953375619	0.106032403827993	0.061217836892915	264.45948968389
50	A7	COX3	3	1.78052249907237	0.0222868505078461	0.0128673191400939	264.45948968389
50	A7	OLI1	3	-11.6989441625485	0	0	264.45948968389
50	A7	COX1	3	-11.3490082155486	0	0	264.45948968389
50	A7	rns	3	1.98740435051643	0.100643581862571	0.0581065990805637	264.45948968389
50	A7	rnl	3	0.0857188779986648	0.00940394084918246	0.00542936778071881	264.45948968389
50	A8	ATP6	2	-11.3297929565012	0	0	229.398221557684
50	A8	ATP8	2	-11.4422443158187	0	0	229.398221557684
50	A8	COB	2	-11.5614186521204	0	0	229.398221557684
50	A8	COX1	2	-12.4479091278016	0	0	229.398221557684
50	A8	COX2	2	-13.6497718952307	0	0	229.398221557684
50	A8	COX3	2	-12.0977697103602	0	0	229.398221557684
50	A8	OLI1	2	-13.3138543565416	0	0	229.398221557684
50	A8	rnl	2	-13.3486944603722	0	0	229.398221557684
50	A8	rns	2	-11.8470239380974	0	0	229.398221557684
50	A8	VAR1	2	-10.4549504286075	0	0	229.398221557684
50	A9	ATP6	2	-10.1369221714609	0	0	229.25113507155
50	A9	ATP8	2	-8.4380558874357	0	0	229.25113507155
50	A9	COB	2	-9.062767857207	0.166311478058891	0.1175999739246	229.25113507155
50	A9	COX1	2	-12.4007055963	0	0	229.25113507155
50	A9	COX2	2	-11.1626032449693	0	0	229.25113507155
50	A9	COX3	2	-8.4381677216657	0	0	229.25113507155
50	A9	OLI1	2	-10.3848312244147	0	0	229.25113507155
50	A9	rnl	2	-11.9647698153144	0	0	229.25113507155
50	A9	rns	2	-9.46528417218115	0	0	229.25113507155
50	A9	VAR1	2	-9.9069423702907	0	0	229.25113507155
50	B12	ATP6	2	-6.48732004991345	0	0	240.227356914232
50	B12	ATP8	2	-5.77670085707345	0	0	240.227356914232
50	B12	COB	2	-5.65067092171345	0	0	240.227356914232
50	B12	COX1	2	-7.59662116795975	0	0	240.227356914232
50	B12	COX2	2	-7.2432273772846	0	0	240.227356914232
50	B12	COX3	2	-5.4650728178689	0	0	240.227356914232
50	B12	OLI1	2	-7.2271056592003	0	0	240.227356914232
50	B12	rnl	2	-6.66749615057905	0	0	240.227356914232
50	B12	rns	2	-6.36546975527215	0	0	240.227356914232
50	B12	VAR1	2	-4.50657595069515	0	0	240.227356914232
50	B5	ATP6	2	-12.2149755014129	0	0	274.703843322882
50	B5	ATP8	2	-12.4403305173807	0	0	274.703843322882
50	B5	COB	2	-12.3332897919347	0	0	274.703843322882
50	B5	COX1	2	-13.1620878448285	0	0	274.703843322882
50	B5	COX2	2	-14.4592431943399	0	0	274.703843322882
50	B5	COX3	2	-12.8312812445792	0	0	274.703843322882
50	B5	OLI1	2	-14.1519465679831	0	0	274.703843322882
50	B5	rnl	2	-14.0774486984305	0	0	274.703843322882
50	B5	rns	2	-12.6253416773305	0	0	274.703843322882
50	B5	VAR1	2	-11.2191733450971	0	0	274.703843322882
50	B8	ATP6	2	-6.66692261257985	0	0	235.916483065087
50	B8	ATP8	2	-5.99774478688125	0	0	235.916483065087
50	B8	COB	2	-5.8104098822053	0	0	235.916483065087
50	B8	COX1	2	-7.24732417252415	0	0	235.916483065087
50	B8	COX2	2	-7.3998301601034	0	0	235.916483065087
50	B8	COX3	2	-5.668677589083	0	0	235.916483065087
50	B8	OLI1	2	-7.3280730062534	0	0	235.916483065087
50	B8	rnl	2	-6.84977032812815	0	0	235.916483065087
50	B8	rns	2	-6.45596061432535	0	0	235.916483065087
50	B8	VAR1	2	-4.68782323408835	0	0	235.916483065087
50	D1	ATP6	2	-10.0345319387201	0	0	246.777479582312
50	D1	ATP8	2	-9.19555501621415	0	0	246.777479582312
50	D1	COX1	2	-10.2068543196189	0	0	246.777479582312
50	D1	COB	2	-10.0250574570098	0	0	246.777479582312
50	D1	VAR1	2	-7.7935207945837	0	0	246.777479582312
50	D1	COX2	2	0.520078493411199	0.0997254429138264	0.0705165369411986	246.777479582312
50	D1	COX3	2	0.382349800752648	0.139360868549573	0.0985430151834502	246.777479582312
50	D1	OLI1	2	-10.6816137786036	0	0	246.777479582312
50	D1	rnl	2	-10.1346437957753	0	0	246.777479582312
50	D1	rns	2	0.294651401508153	0.0727616825159901	0.0514502791175993	246.777479582312
7	A4	ATP6	2	-3.89836138461355	0.323400790481844	0.228678891990802	31.0579086973449
7	A4	ATP8	2	-4.31590805714745	0.00432175923736983	0.00305594526339981	31.0579086973449
7	A4	COB	2	-4.4761828363124	0.00830207476224146	0.00587045336229863	31.0579086973449
7	A4	COX1	2	-5.6899880863553	1.40749727867747	0.99525087025445	31.0579086973449
7	A4	COX2	2	0.714676733167854	0.106664307960938	0.0754230554697495	31.0579086973449
7	A4	COX3	2	1.27552523493425	0.125717049693231	0.08889537834885	31.0579086973449
7	A4	OLI1	2	-9.59931050069855	0.0856587290946512	0.0605698682106492	31.0579086973449
7	A4	rnl	2	-3.6698670706599	0.0208514028759685	0.01474416837085	31.0579086973449
7	A4	rns	2	1.38840259275265	0.213751491163928	0.15114512889075	31.0579086973449
7	A4	VAR1	2	-13.0141068373097	0	0	31.0579086973449
7	A7	COB	3	-7.19974907118856	0.00713014507129816	0.00411659117627508	33.5124759911542
7	A7	COX1	3	-2.72093367341023	0.0956930308987219	0.0552483971489483	33.5124759911542
7	A7	ATP8	3	-2.30723909667783	0.0249141591456572	0.0143841964893784	33.5124759911542
7	A7	ATP6	3	-2.0519298831631	0.0181442153212845	0.0104755675999781	33.5124759911542
7	A7	OLI1	3	-5.9364275539824	0.0378165888073844	0.0218334177277768	33.5124759911542
7	A7	rnl	3	1.23619344689993	0.0546943754932879	0.0315778124142082	33.5124759911542
7	A7	COX2	3	2.30571613153263	0.0250071859649655	0.0144379055485479	33.5124759911542
7	A7	COX3	3	2.31484179185306	0.0515986116980093	0.0297904723536566	33.5124759911542
7	A7	rns	3	2.2848199171359	0.0103360064409403	0.00596749610102257	33.5124759911542
7	A7	VAR1	3	-5.95019002466	0.0955558728610174	0.055169208918958	33.5124759911542
7	A8	ATP6	2	-4.04334487856695	0.0418361314748077	0.0295826122644485	31.3027907534645
7	A8	ATP8	2	-4.33357996921235	0.0245429372049409	0.0173544773278493	31.3027907534645
7	A8	COB	2	-2.7944451110301	0.0573815298864265	0.0405748688975507	31.3027907534645
7	A8	COX1	2	-4.23127196896715	0.182710936003407	0.12919614184495	31.3027907534645
7	A8	COX2	2	-1.0988112147547	0.100504500629872	0.0710674139351504	31.3027907534645
7	A8	COX3	2	-0.737261233660847	0.00898305083390709	0.00635197616039918	31.3027907534645
7	A8	OLI1	2	-1.25262404331925	0.0385035101942649	0.0272260931578501	31.3027907534645
7	A8	rnl	2	-1.93092880780375	0.0768345661169889	0.054330242730849	31.3027907534645
7	A8	rns	2	-0.0403875071268516	0.0555463017956654	0.0392771666695495	31.3027907534645
7	A8	VAR1	2	-0.402024418306947	0.183202536327498	0.129543755767749	31.3027907534645
7	A9	ATP6	2	-6.25690639876265	0.161249405675294	0.114020548215301	29.9501736737896
7	A9	ATP8	2	-9.5924844789901	0.774650391394902	0.547760544804149	29.9501736737896
7	A9	COB	2	-4.430765566767	0.515978163701976	0.36485165849785	29.9501736737896
7	A9	COX1	2	-9.18297442530105	0.442930750269558	0.31319933711165	29.9501736737896
7	A9	COX2	2	-3.8838565509421	0.405471550722987	0.286711683094449	29.9501736737896
7	A9	COX3	2	-0.580778865198898	1.73312451834186	1.2255040995602	29.9501736737896
7	A9	OLI1	2	0.953949709521851	0.0397694698048457	0.0281212617832001	29.9501736737896
7	A9	rnl	2	-13.1287330682323	0	0	29.9501736737896
7	A9	rns	2	1.74491764759775	1.79288320609959	1.2677598729085	29.9501736737896
7	A9	VAR1	2	1.2466662867682	0.290631481474766	0.2055074913771	29.9501736737896
7	B12	ATP6	2	-4.4840697352837	0.00169878026694126	0.00120121904650006	33.8975252512256
7	B12	ATP8	2	-9.11781284179995	0.0109059012930969	0.00771163675929998	33.8975252512256
7	B12	COB	2	-4.7124827577778	0.000859461389877717	0.000607730976950549	33.8975252512256
7	B12	COX1	2	-12.930519627447	0.477840196603714	0.337884043341999	33.8975252512256
7	B12	COX2	2	-6.2397681322038	0.00827074343677761	0.00584829876959958	33.8975252512256
7	B12	COX3	2	-5.46768101386085	0.253305398279721	0.17911396483475	33.8975252512256
7	B12	OLI1	2	-0.979277128969598	0.0383880013586513	0.0271444160769008	33.8975252512256
7	B12	rnl	2	-3.3411706779184	0.0797310016585414	0.0563783319435505	33.8975252512256
7	B12	rns	2	-4.36349953823005	0.0869034639455499	0.061450028664499	33.8975252512256
7	B12	VAR1	2	-1.8938569570731	0.26903186170472	0.190234253766649	33.8975252512256
7	B5	ATP6	2	-11.9014409885078	0	0	34.1863988972665
7	B5	ATP8	2	-11.9427763182495	0	0	34.1863988972665
7	B5	COB	2	-3.40297477805745	0.0288149374294079	0.0203752376558004	34.1863988972665
7	B5	COX1	2	-12.9819158033727	0	0	34.1863988972665
7	B5	COX2	2	-1.2961516699233	0.0412709077961754	0.0291829387684004	34.1863988972665
7	B5	COX3	2	-1.3360612072469	0.0862535798391824	0.0609904912059012	34.1863988972665
7	B5	OLI1	2	-3.115607335124	0.0100364242723593	0.00709682366185049	34.1863988972665
7	B5	rnl	2	-13.8900286463214	0	0	34.1863988972665
7	B5	rns	2	0.0776929057323965	0.00268183130773847	0.00189634110370026	34.1863988972665
7	B5	VAR1	2	-1.85310515198165	0.244929897019272	0.17319159109765	34.1863988972665
7	B8	ATP6	2	-6.3157427257129	0.0370896382608471	0.026226334726001	32.9455903815937
7	B8	ATP8	2	-7.03164585713805	0.0611876969366596	0.0432662354290993	32.9455903815937
7	B8	COB	2	-3.20342021272865	0.00138957703870696	0.000982579347050816	32.9455903815937
7	B8	COX1	2	-8.35209853700595	0.0575447494674998	0.0406902825701501	32.9455903815937
7	B8	COX2	2	-13.6842546546052	0	0	32.9455903815937
7	B8	COX3	2	0.940030194094852	0.0307159393534646	0.0217194490073496	32.9455903815937
7	B8	OLI1	2	-2.25203672398705	0.0181276695887314	0.0128181980933011	32.9455903815937
7	B8	rnl	2	-13.0609825661959	0	0	32.9455903815937
7	B8	rns	2	1.8662426779374	0.0642347611800332	0.0454208352182999	32.9455903815937
7	B8	VAR1	2	-3.4824890160356	0.0855858409775805	0.0605183285288007	32.9455903815937
7	D1	ATP6	2	-12.1514863447965	0	0	31.2318447493944
7	D1	ATP8	2	-11.3125094222906	0	0	31.2318447493944
7	D1	COX1	2	-12.3238087256953	0	0	31.2318447493944
7	D1	COB	2	-10.414731920234	0.0467729835459247	0.0330734938416501	31.2318447493944
7	D1	VAR1	2	-9.8347104665685	0	0	31.2318447493944
7	D1	COX2	2	0.411982573066352	0.0440883954657989	0.0311752034055006	31.2318447493944
7	D1	COX3	2	0.401782799237552	0.141354973577083	0.0999530603708009	31.2318447493944
7	D1	OLI1	2	-10.2578535752219	0.198908081933094	0.1406492535677	31.2318447493944
7	D1	rnl	2	-3.8648487519044	0.00846388600234894	0.00598487118745083	31.2318447493944
7	D1	rns	2	0.0427675739057971	0.0758764662951892	0.0536527638498008	31.2318447493944
9	A4	ATP6	2	-7.36178671056275	0.257551661123449	0.182116526086251	39.6283198907956
9	A4	ATP8	2	-8.17077215666155	1.31303933387093	0.928459016944799	39.6283198907956
9	A4	COB	2	-12.0619686388984	0	0	39.6283198907956
9	A4	COX1	2	-8.50352535088865	0.160526043778818	0.113509054113051	39.6283198907956
9	A4	COX2	2	0.246146370324703	0.064031012030778	0.0452767628132005	39.6283198907956
9	A4	COX3	2	-0.376804243300953	0.281267482096145	0.19888614391745	39.6283198907956
9	A4	OLI1	2	-13.7528573615748	0	0	39.6283198907956
9	A4	rnl	2	-1.1065177204611	1.45493792743516	1.0287964746949	39.6283198907956
9	A4	rns	2	0.711920367156999	0.549092509170929	0.388267036733501	39.6283198907956
9	A4	VAR1	2	-12.1622328246942	0	0	39.6283198907956
9	A7	COX3	3	2.27558669957897	0.0363030155721133	0.0209595558129548	44.2789193080446
9	A7	OLI1	3	-13.533716002849	0	0	44.2789193080446
9	A7	ATP6	3	-2.80691192240624	0.0378692593671761	0.0218638270896509	44.2789193080446
9	A7	ATP8	3	-3.09393158750443	0.0741891987117157	0.0428331538471717	44.2789193080446
9	A7	COB	3	-13.0785288472202	0	0	44.2789193080446
9	A7	COX1	3	-3.38982539720414	0.207541927547674	0.119824387737784	44.2789193080446
9	A7	COX2	3	2.26201538008257	0.0630292950430673	0.0363899804599472	44.2789193080446
9	A7	VAR1	3	-12.223153915041	0	0	44.2789193080446
9	A7	rnl	3	1.20181818981957	0.021562926966463	0.0124493616886036	44.2789193080446
9	A7	rns	3	2.19903584722206	0.0550160466836914	0.0317635293625782	44.2789193080446
9	A8	COB	2	-8.79697037994135	0.0556235960134623	0.0393318219351002	39.7002849422634
9	A8	COX2	2	-2.80055536494825	0.09813946961448	0.0693950844664499	39.7002849422634
9	A8	COX3	2	-2.02968771210975	0.178883080359229	0.126489439161549	39.7002849422634
9	A9	ATP6	2	-13.3090746218166	0	0	38.9257472984304
9	A9	ATP8	2	-12.5870604431144	0	0	38.9257472984304
9	A9	COB	2	-13.0169503696528	0	0	38.9257472984304
9	A9	COX1	2	-14.3784434317467	0	0	38.9257472984304
9	A9	COX2	2	-4.4095229085303	0.0609699250865716	0.0431122474771506	38.9257472984304
9	A9	COX3	2	-3.3312924967685	0.0573514282346438	0.0405535838154503	38.9257472984304
9	A9	OLI1	2	-1.94682002509725	1.17818522166486	0.833102759733	38.9257472984304
9	A9	rnl	2	-14.4895326419716	0	0	38.9257472984304
9	A9	rns	2	-2.2278208669295	0.0155089157682773	0.0109664595085999	38.9257472984304
9	A9	VAR1	2	-0.5133951718371	0.0214205660183793	0.0151466274884501	38.9257472984304
9	B12	ATP6	2	-7.341142374864	0.0842724457789194	0.0595896178774495	43.7584148233148
9	B12	ATP8	2	-12.3691623349188	0.0935237307462655	0.0661312642125491	43.7584148233148
9	B12	COB	2	-7.8392667246226	0.0392529397563176	0.0277560198831992	43.7584148233148
9	B12	COX1	2	-13.8523071180537	0	0	43.7584148233148
9	B12	COX2	2	-8.92662725110835	0.0709659344186976	0.0501804934607009	43.7584148233148
9	B12	COX3	2	-8.4646454654303	0.157799883071568	0.11158136739035	43.7584148233148
9	B12	OLI1	2	-3.56218853384545	0.00716250586615906	0.0050646564682495	43.7584148233148
9	B12	rnl	2	-3.87832617728745	0.0907414572566141	0.0641638997609011	43.7584148233148
9	B12	rns	2	-13.0811247444435	0	0	43.7584148233148
9	B12	VAR1	2	-3.9469168890632	0.301529005544921	0.21321320454525	43.7584148233148
9	B5	ATP6	2	-11.8210680533252	0	0	45.0879319143142
9	B5	ATP8	2	-11.8836068569829	0	0	45.0879319143142
9	B5	COB	2	-10.6918776613863	0.0437021593871494	0.0309020932551487	45.0879319143142
9	B5	COX1	2	-12.846987486379	0	0	45.0879319143142
9	B5	COX2	2	-6.06209094169405	0.0394446143837655	0.027891554312049	45.0879319143142
9	B5	COX3	2	-5.0398969236527	0.125410703050527	0.0886787585604001	45.0879319143142
9	B5	OLI1	2	-10.527735819197	0.0309227486229303	0.021865685244201	45.0879319143142
9	B5	rnl	2	-13.6642812440216	0	0	45.0879319143142
9	B5	rns	2	-1.69681718542225	0.100064961600805	0.0707566129071004	45.0879319143142
9	B5	VAR1	2	-9.98866581662775	0.0302658352453334	0.02140117734025	45.0879319143142
9	B8	ATP6	2	-3.2896506280416	0.0652150935052096	0.0461140348532485	41.5770486062659
9	B8	ATP8	2	-4.11272452093285	0.030973996340763	0.0219019228530009	41.5770486062659
9	B8	COB	2	-11.3464545733371	0	0	41.5770486062659
9	B8	COX1	2	-4.96541239694195	0.176307813697676	0.124668450641801	41.5770486062659
9	B8	COX2	2	-12.9908422614025	0	0	41.5770486062659
9	B8	COX3	2	0.590431369969449	0.0976052576771886	0.0690173395830004	41.5770486062659
9	B8	OLI1	2	-12.8647851033495	0	0	41.5770486062659
9	B8	rnl	2	-12.3735996444157	0	0	41.5770486062659
9	B8	rns	2	1.54872395750235	0.0704086339410545	0.0497864225138009	41.5770486062659
9	B8	VAR1	2	-10.1549230507844	0	0	41.5770486062659
9	D1	ATP6	2	-12.2635747523996	0	0	40.3133453351496
9	D1	ATP8	2	-11.4245978298937	0	0	40.3133453351496
9	D1	COX1	2	-12.4358971332984	0	0	40.3133453351496
9	D1	COB	2	-12.1844064811611	0	0	40.3133453351496
9	D1	VAR1	2	-9.95286981873495	0	0	40.3133453351496
9	D1	COX2	2	0.388120304513799	0.137466985500533	0.0972038376366999	40.3133453351496
9	D1	COX3	2	0.358709003935349	0.0373515320820868	0.0264115216229505	40.3133453351496
9	D1	OLI1	2	-8.78890206276175	0	0	40.3133453351496
9	D1	rnl	2	-7.6725914686115	0.0713375443434519	0.0504432613584509	40.3133453351496
9	D1	rns	2	0.101706671391803	0.208973717572816	0.147766732785501	40.3133453351496
