# Supplementary material for: Genetically controlled mtDNA deletions prevent ROS damage by arresting oxidative phosphorylation
Source: eLife. 2022 Jul 8;11:e76095. doi: 10.7554/eLife.76095 (PMC9427111; doi:10.7554/eLife.76095)
Supplement: Figure 4—figure supplement 1—source data 1. — Data are shown in Figure 4—figure supplement 1A. [file elife-76095-fig4-figsupp1-data1.xlsx]

## Sheet: Data S29 - SOD dose-resp. curv.
README:Log corrected cells : adjusted in y-axis to match initial value for curve comparison and retain shape in log2 scale.
Log corrected cells = 2^ (log2(Cellsk;t=n) / log2(Cellsk;t=0) /log2(median(Cellst=0))
Strain	Concentration paraquat (µg/mL)	N	Time (h)	#cells	#cells S.D	Log corrected cells
Founder	0	288	0	32971.80809805365	14543.530022742505	47881.000000000015
Founder	0	288	0.3333333333333333	32992.617421420764	14561.74914709385	47912.30288531372
Founder	0	288	0.6666666666666666	33076.91371140195	14657.416639905152	48039.11468421378
Founder	0	288	1	33262.69287342493	14829.764586579584	48318.63393158341
Founder	0	288	1.3333333333333333	33603.30696045638	15099.17532879738	48831.25962099511
Founder	0	288	1.6666666666666667	34159.368233849724	15497.05470430009	49668.53392778654
Founder	0	288	2	34997.48534667176	16084.959455291139	50931.427618771035
Founder	0	288	2.3333333333333335	36211.663764627905	16878.783027422178	52762.89705872017
Founder	0	288	2.6666666666666665	37794.16799805559	17861.61036423137	55153.247486276945
Founder	0	288	3	39784.40359631902	19068.314672189477	58164.55385664458
Founder	0	288	3.3333333333333335	42226.50537191448	20466.86217146782	61866.91633174611
Founder	0	288	3.6666666666666665	45132.57138696421	22069.812172734633	66282.66116984274
Founder	0	288	4	48530.172325560045	23885.566932606467	71458.19818762469
Founder	0	288	4.333333333333333	52485.82902664354	25976.59737842223	77500.16231255601
Founder	0	288	4.666666666666667	57081.88986864937	28295.78432894251	84540.77311031253
Founder	0	288	5	62385.393441791966	30903.75399243771	92690.33071000829
Founder	0	288	5.333333333333333	68443.49481000825	33792.405031844915	102029.79814319558
Founder	0	288	5.666666666666667	75275.68702376934	36950.46186412451	112598.18850700653
Founder	0	288	6	82953.43975328087	40365.936750565146	124515.56297522677
Founder	0	288	6.333333333333333	91480.54136340694	44003.127442853205	137797.64912930908
Founder	0	288	6.666666666666667	100899.43326770325	47942.98443380372	152520.42597064737
Founder	0	288	7	111218.38367529935	52034.10099402287	168706.689272657
Founder	0	288	7.333333333333333	122422.40711278564	56334.60644206104	186342.29371422494
Founder	0	288	7.666666666666667	134669.137667803	60878.806851921014	205685.39791749488
Founder	0	288	8	147957.99152295853	65770.28536583953	226745.8873150814
Founder	0	288	8.333333333333334	162268.3616462073	70727.36118780781	249501.21405277142
Founder	0	288	8.666666666666666	177846.40091760096	76121.50148644105	274354.14250752423
Founder	0	288	9	194620.58940497044	81657.71717340406	301202.7388555969
Founder	0	288	9.333333333333334	212826.7817911999	87579.68572181437	330437.34375709767
Founder	0	288	9.666666666666666	232223.93262993605	93653.57494223269	361683.10329011065
Founder	0	288	10	253009.16751900487	100042.14634069405	395268.8074275597
Founder	0	288	10.333333333333334	274939.9387662251	106536.79341183016	430812.919372905
Founder	0	288	10.666666666666666	298303.2282131216	113407.60142816017	468790.71858712763
Founder	0	288	11	323114.5749955051	120456.4703065244	509239.2740753652
Founder	0	288	11.333333333333334	349874.16456887306	127986.07847775689	552988.8429884422
Founder	0	288	11.666666666666666	377754.0720627136	135723.75958857668	598697.8363127128
Founder	0	288	12	407864.3103111095	143958.2371432672	648199.3785833102
Founder	0	288	12.333333333333334	439546.2320499517	152304.08465215808	700426.4157126088
Founder	0	288	12.666666666666666	471930.78990618285	160767.25918997778	753951.4824917504
Founder	0	288	13	505744.30044295767	169401.9086542587	809979.0241523964
Founder	0	288	13.333333333333334	541765.2019019746	178483.5994906776	869811.9725599501
Founder	0	288	13.666666666666666	578951.1600010479	187817.58252826173	931729.9921360764
Founder	0	288	14	618141.247974892	197641.64405158992	997139.5380684622
Founder	0	288	14.333333333333334	660511.9444187323	207893.92148159782	1068024.9597766798
Founder	0	288	14.666666666666666	704494.4742878606	218542.15584132596	1141779.6181844953
Founder	0	288	15	749274.876336959	229530.1523684907	1217042.1146569808
Founder	0	288	15.333333333333334	796393.9346005153	240817.44234164798	1296409.4698020904
Founder	0	288	15.666666666666666	844776.5000388299	252376.86129710215	1378080.5019400867
Founder	0	288	16	892945.3589606916	264600.29898593586	1459557.6918993082
Founder	0	288	16.333333333333332	942456.5581380585	277206.18252925563	1543469.8591691244
Founder	0	288	16.666666666666668	993902.33016763	290016.60766930814	1630828.3551254175
Founder	0	288	17	1045727.4556101096	303511.2488585049	1718995.1736976588
Founder	0	288	17.333333333333332	1096924.8803320797	318397.3636912365	1806248.2056763542
Founder	0	288	17.666666666666668	1154000.0387206993	331984.38757319865	1903690.4084676602
Founder	0	288	18	1216723.823990398	350181.6661007978	2010975.567508946
Founder	0	288	18.333333333333332	1284812.0589878373	370416.05551807274	2127660.7810466364
Founder	0	288	18.666666666666668	1354053.3531095174	388611.3001523231	2246549.7016630718
Founder	0	288	19	1423798.8920451808	405286.9715710621	2366525.092844723
Founder	0	288	19.333333333333332	1488593.5997428515	423363.886815699	2478173.4161005034
Founder	0	288	19.666666666666668	1549681.0913623367	437304.92820963054	2583593.70282908
Founder	0	288	20	1605919.334516161	450513.6689243636	2680777.5164448535
Founder	0	288	20.333333333333332	1663181.1923059288	466479.6954055584	2779855.684969672
Founder	0	288	20.666666666666668	1723930.4559471526	483106.6241160196	2885101.734821878
Founder	0	288	21	1787739.9582616296	499955.3740638202	2995792.797997241
Founder	0	288	21.333333333333332	1851419.5578108367	517393.549947464	3106399.8865529536
Founder	0	288	21.666666666666668	1914755.3808839826	536086.227398772	3216545.297163699
Founder	0	288	22	1979571.9900625877	554461.631584479	3329401.2379554408
Founder	0	288	22.333333333333332	2043840.6132486535	572978.7234156845	3441433.9944918584
Founder	0	288	22.666666666666668	2103997.599158767	593655.6539726733	3546413.986257569
Founder	0	288	23	2164275.33274945	614361.2266169224	3651712.7229495486
Founder	0	288	23.333333333333332	2229157.639170371	632774.5362079481	3765172.6727378536
Founder	0	288	23.666666666666668	2290637.379057224	654146.2497851237	3872791.936701854
Founder	0	288	24	2350933.710356667	677028.1223254814	3978440.3488261993
Founder	0	288	24.333333333333332	2415092.4778192234	698188.3831148533	4090963.0498331957
Founder	0	288	24.666666666666668	2478720.827539212	719983.0589452562	4202661.434354528
Founder	0	288	25	2539174.6205398184	744759.7324967998	4308882.290094701
Founder	0	288	25.333333333333332	2604980.582043566	766730.2003817896	4424610.290985799
Founder	0	288	25.666666666666668	2668622.426795224	790462.6725070181	4536632.225128399
Founder	0	288	26	2730948.5491212853	815609.3339017618	4646431.146990843
Founder	0	288	26.333333333333332	2793511.311597147	841304.9111380904	4756737.368221456
Founder	0	288	26.666666666666668	2855408.9437632468	866715.0325187718	4865958.108073088
Founder	0	288	27	2912384.4799957634	893668.3309529749	4966568.741315822
Founder	0	288	27.333333333333332	2974907.675883402	917812.960374793	5077056.956232209
Founder	0	288	27.666666666666668	3035058.5505003515	943253.4430391655	5183431.557185063
Founder	0	288	28	3096758.0737988935	967091.7429641606	5292623.4511902025
Founder	0	288	28.333333333333332	3158967.961083422	990879.9068827364	5402797.569198895
Founder	0	288	28.666666666666668	3217228.9720264613	1015855.8778836891	5506048.811756128
Founder	0	288	29	3274187.358587684	1041377.0160026554	5607056.370581464
Founder	0	288	29.333333333333332	3329989.342257549	1066374.4740529147	5706074.3483830225
Founder	0	288	29.666666666666668	3382109.792290868	1093290.871311868	5798613.399577314
Founder	0	288	30	3436369.3886001306	1118539.555080333	5895004.808758564
Founder	0	288	30.333333333333332	3491346.631562478	1143226.0365338556	5992726.787943734
Founder	0	288	30.666666666666668	3541757.095645457	1168978.8507512663	6082379.855520909
Founder	0	288	31	3596127.1896614437	1192618.6514082742	6179126.260441972
Founder	0	288	31.333333333333332	3647482.3129078927	1216658.1331041548	6270556.010324851
Founder	0	288	31.666666666666668	3698398.943006022	1240516.0433776823	6361250.67941126
Founder	0	288	32	3750677.4433066063	1263832.7600001988	6454417.759423606
Founder	0	288	32.333333333333336	3801361.1852783584	1287400.2834425443	6544787.250095747
Founder	0	288	32.666666666666664	3846534.256454866	1312908.6390876018	6625367.616559783
Founder	0	288	33	3897614.275907706	1336637.9183892072	6716525.75219241
Founder	0	288	33.333333333333336	3943985.545757556	1362973.852435802	6799317.70878903
Founder	0	288	33.666666666666664	3991903.1100105294	1388827.151330536	6884907.118785085
Founder	0	288	34	4040716.3980188663	1414528.3963408484	6972134.340848344
Founder	0	288	34.333333333333336	4089720.586215959	1440994.3722128563	7059740.710698816
Founder	0	288	34.666666666666664	4132818.6199947367	1470341.2126003187	7136819.590505847
Founder	0	288	35	4178972.710110984	1499178.8948552501	7219396.049995868
Founder	0	288	35.333333333333336	4223955.154967467	1529487.871143714	7299907.743028482
Founder	0	288	35.666666666666664	4271193.761295399	1559418.2681640426	7384490.719281664
Founder	0	288	36	4319575.921734669	1588742.2850160715	7471156.062241632
Founder	0	288	36.333333333333336	4369494.025138975	1616372.4593511422	7560609.177084598
Founder	0	288	36.666666666666664	4417537.203579472	1643745.4444559847	7646737.051386283
Founder	0	288	37	4463292.098304962	1670947.786724815	7728793.917909369
Founder	0	288	37.333333333333336	4506070.399558288	1697859.7513495698	7805539.855995188
Founder	0	288	37.666666666666664	4548334.350259924	1724376.1141218755	7881388.692600917
Founder	0	288	38	4588882.659456489	1750732.971652225	7954182.322961112
Founder	0	288	38.333333333333336	4628263.644970926	1777532.5561014768	8024902.421178674
Founder	0	288	38.666666666666664	4670483.80526208	1804211.3664435274	8100745.0569621
Founder	0	288	39	4710691.075156024	1831348.5466594584	8172994.678100885
Founder	0	288	39.333333333333336	4751881.538964276	1858500.03936575	8247033.96308511
Founder	0	288	39.666666666666664	4794133.153760198	1885428.9607176427	8323004.566069784
Founder	0	288	40	4835218.899520456	1912030.305589756	8396901.906734848
Founder	0	288	40.333333333333336	4876132.257256311	1937878.7205293903	8470511.567700941
Founder	0	288	40.666666666666664	4918612.289546439	1963918.1396256664	8546963.36402375
Founder	0	288	41	4958815.537803696	1989840.5007544637	8619339.42131186
Founder	0	288	41.333333333333336	4998469.071969921	2016421.840893591	8690746.470015831
Founder	0	288	41.666666666666664	5036539.3055570265	2042208.8275407695	8759321.470796324
Founder	0	288	42	5073099.637028878	2068584.9359660163	8825194.221887589
Founder	0	288	42.333333333333336	5108978.744655643	2095140.8105618707	8889856.128463749
Founder	0	288	42.666666666666664	5146981.834080175	2121930.8438393306	8958363.668023795
Founder	0	288	43	5184479.523195281	2149225.0110090165	9025977.912701145
Founder	0	288	43.333333333333336	5223420.526351504	2177425.185414514	9096213.24320512
Founder	0	288	43.666666666666664	5260164.671564555	2204723.6032426455	9162503.467645593
Founder	0	288	44	5296631.133354465	2231997.092564996	9228309.142635098
Founder	0	288	44.333333333333336	5332537.45503698	2258687.525434878	9293119.89190468
Founder	0	288	44.666666666666664	5369195.478066632	2284452.9335165685	9359303.604189023
Founder	0	288	45	5405621.824208247	2309071.9857995156	9425085.091661427
Founder	0	288	45.333333333333336	5442670.518290476	2333114.989250684	9492006.769764613
Founder	0	288	45.666666666666664	5479491.376810938	2357009.0348207788	9558533.09229737
Founder	0	288	46	5512416.584916907	2381328.037370825	9618034.504751759
Founder	0	288	46.333333333333336	5545466.865350602	2405748.015968672	9677774.762618288
Founder	0	288	46.666666666666664	5577393.545130714	2430574.5806025616	9735496.174705816
Founder	0	288	47	5609541.5227375515	2456084.528902886	9793629.652507627
Founder	0	288	47.333333333333336	5640474.153312243	2480665.701934589	9849576.687465375
Founder	0	288	47.666666666666664	5673854.109940088	2504553.1811929885	9909962.47880281
Founder	0	288	48	5705781.711558864	2528009.906928195	9967732.819266785
Founder	0	288	48.333333333333336	5737695.477673923	2550589.443735998	10025489.711436274
Founder	0	288	48.666666666666664	5766747.025696863	2571952.7018060707	10078076.63810798
Founder	0	288	49	5795919.152297704	2592751.313666907	10130891.387169695
Founder	0	288	49.333333333333336	5821654.578801586	2613620.6432834473	10177492.070477651
Founder	0	288	49.666666666666664	5848513.438407839	2634879.24537449	10226134.899859581
Founder	0	288	50	5876903.805407107	2656032.5714572747	10277560.079841077
Founder	0	288	50.333333333333336	5906793.3559465995	2677836.3463746505	10331710.447890816
Founder	0	288	50.666666666666664	5937257.022982937	2700223.925539157	10386911.04421785
Founder	0	288	51	5969311.86586293	2721881.0218389635	10445005.840077762
Founder	0	288	51.333333333333336	6001049.835546098	2743892.5346065825	10502537.371847706
Founder	0	288	51.666666666666664	6031496.630101753	2766339.5094345855	10557738.64182425
Founder	0	288	52	6062049.625389904	2788572.9895768412	10613142.503790924
Founder	0	288	52.333333333333336	6092106.466477711	2810318.3074640064	10667656.427037185
Founder	0	288	52.666666666666664	6121955.236675934	2831982.221602249	10721802.519150449
Founder	0	288	53	6150261.337299466	2853461.561563959	10773158.934039883
Founder	0	288	53.333333333333336	6179034.039436742	2875781.785239034	10825370.602146687
Founder	0	288	53.666666666666664	6207292.766636399	2898471.584413326	10876658.085581208
Founder	0	288	54	6234892.091817873	2920985.149201706	10926756.886502227
Founder	0	288	54.333333333333336	6262185.3256259225	2944138.0782748563	10976307.886268882
Founder	0	288	54.666666666666664	6290693.2631200235	2967412.7057117694	11028072.455832584
Founder	0	288	55	6318263.758679688	2990249.1385724596	11078142.825921932
Founder	0	288	55.333333333333336	6346696.452433219	3013644.1388037424	11129787.22806795
Founder	0	288	55.666666666666664	6374855.25327156	3037915.421268412	11180942.316239329
Founder	0	288	56	6403562.115396934	3062253.6599812876	11233101.389278952
Founder	0	288	56.333333333333336	6431049.281356634	3085451.2626300897	11283052.18875389
Founder	0	288	56.666666666666664	6459269.076232742	3108123.4376107026	11334342.316511799
Founder	0	288	57	6487205.9589702785	3130601.9001119803	11385126.160780359
Founder	0	288	57.333333333333336	6515121.9608326545	3153601.374129066	11435879.882028125
Founder	0	288	57.666666666666664	6543563.9822294125	3176413.8220857787	11487597.973263558
Founder	0	288	58	6572331.135225006	3200296.4317940245	11539915.474196672
Founder	0	288	58.333333333333336	6600277.497218886	3224384.711001413	11590748.104778448
Founder	0	288	58.666666666666664	6626976.929751836	3248635.573759335	11639319.8613851
Founder	0	288	59	6653598.364513661	3271959.9576259833	11687756.711305667
Founder	0	288	59.333333333333336	6679669.455768544	3295423.5045772516	11735198.965074968
Founder	0	288	59.666666666666664	6705796.484547912	3318548.3856342616	11782749.67186014
Founder	0	288	60	6731530.8934179675	3342067.6529396935	11829592.312941406
Founder	0	288	60.333333333333336	6756366.568048631	3364686.444101821	11874805.137504213
Founder	0	288	60.666666666666664	6779970.289919111	3387428.803880438	11917780.74233432
Founder	0	288	61	6803066.18100439	3410164.099866065	11959836.926755922
Founder	0	288	61.333333333333336	6824301.210542895	3432559.224720864	11998509.116289772
Founder	0	288	61.666666666666664	6845398.8684583055	3454356.3762050467	12036935.405105507
Founder	0	288	62	6867422.170965692	3477205.032825645	12077052.150312683
Founder	0	288	62.333333333333336	6888816.098547107	3500990.4173741713	12116026.869896984
Founder	0	288	62.666666666666664	6908509.967252327	3525452.308914192	12151908.318185976
Founder	0	288	63	6929301.848570122	3549612.0388974636	12189794.282378986
Founder	0	288	63.333333333333336	6955664.043408838	3572999.436415873	12237836.063307963
Founder	0	288	63.666666666666664	6982213.705218551	3595456.521854179	12286226.078788025
Founder	0	288	64	7009524.356448694	3616490.391273533	12336009.975772798
Founder	0	288	64.33333333333333	7035857.020349636	3637582.9599018977	12384017.71166337
Founder	0	288	64.66666666666667	7060917.824869268	3657755.486583955	12429712.673648866
Founder	0	288	65	7080618.582268655	3679476.134941721	12465638.404399285
Founder	0	288	65.33333333333333	7101226.018036836	3701129.5978886895	12503221.363343954
Founder	0	288	65.66666666666667	7123746.029505682	3723233.3585128277	12544296.86815887
Founder	0	288	66	7152058.653055216	3743744.0815777783	12595944.446916088
Founder	0	288	66.33333333333333	7181312.84123387	3766302.00571131	12649317.319394283
Founder	0	288	66.66666666666667	7210669.502632321	3788288.9970690524	12702884.987720601
Founder	0	288	67	7229417.328904735	3807374.071090898	12737098.603485826
Founder	5	288	0	43882.86441432458	35651.29523636094	47881.000000000015
Founder	5	288	0.3333333333333333	43944.58048047149	35687.522483794935	47948.88866002908
Founder	5	288	0.6666666666666666	44674.62127668933	36195.169551394014	48752.00393298869
Founder	5	288	1	45265.989072018325	36552.725242584034	49402.644104881816
Founder	5	288	1.3333333333333333	46329.25298402127	37092.230502662715	50572.65203586327
Founder	5	288	1.6666666666666667	47231.01907131424	37549.72102708539	51565.12081331926
Founder	5	288	2	48409.351893203806	38114.72554887742	52862.206880400394
Founder	5	288	2.3333333333333335	49407.19621589193	38455.059991710135	53960.81636213674
Founder	5	288	2.6666666666666665	51051.45464841191	39200.56466932639	55771.509909933186
Founder	5	288	3	52787.089760106246	40389.42795793719	57683.34543078379
Founder	5	288	3.3333333333333335	55175.20489662026	41749.38906425566	60314.73533864183
Founder	5	288	3.6666666666666665	58000.32545820931	43532.51968707763	63428.845090400675
Founder	5	288	4	61075.0735109703	45518.34930025802	66819.5224314056
Founder	5	288	4.333333333333333	64573.75411339737	48019.61955463388	70679.38216373524
Founder	5	288	4.666666666666667	68279.09478010838	50228.1030764334	74769.09555130139
Founder	5	288	5	72329.03884780506	53095.835592421296	79241.22860237298
Founder	5	288	5.333333333333333	76564.72369150634	56330.75495674219	83920.65024496659
Founder	5	288	5.666666666666667	81297.4078971448	59561.31990949766	89151.6321770185
Founder	5	288	6	86334.82087739371	63130.18892963542	94722.15534250588
Founder	5	288	6.333333333333333	91785.51063538663	67309.03615823746	100752.67674799371
Founder	5	288	6.666666666666667	97703.93218597268	71823.29751909345	107303.99156104308
Founder	5	288	7	103968.48713346048	76038.20822442767	114241.97964572806
Founder	5	288	7.333333333333333	110486.90292469562	81048.80782637603	121464.73874920882
Founder	5	288	7.666666666666667	117700.13831502383	86488.67831953031	129461.44239317806
Founder	5	288	8	125359.7401963312	91755.91949144923	137957.36968942758
Founder	5	288	8.333333333333334	133707.57520166293	97488.47782867156	147221.49391725633
Founder	5	288	8.666666666666666	142679.91468845835	103626.27242030745	157183.92814000338
Founder	5	288	9	152424.4878612703	109963.0555098802	168009.59608031815
Founder	5	288	9.333333333333334	162711.05766732688	116604.77826429873	179443.51559257883
Founder	5	288	9.666666666666666	173597.1670192543	123724.65408156112	191550.2667731606
Founder	5	288	10	185153.48793100764	130481.64236029041	204409.15366836486
Founder	5	288	10.333333333333334	197724.84389528717	138486.303830707	218404.91320587657
Founder	5	288	10.666666666666666	210882.78962656952	146285.67794801085	233061.50086302313
Founder	5	288	11	224807.96883201812	153981.13363119555	248580.82979036457
Founder	5	288	11.333333333333334	239894.77905628597	162467.4035529034	265403.6161789267
Founder	5	288	11.666666666666666	256669.22641048077	171716.68925754481	284118.34768806596
Founder	5	288	12	274221.1144758999	180390.30097249206	303711.12713020225
Founder	5	288	12.333333333333334	293327.7525850513	189868.39149343572	325051.05809183384
Founder	5	288	12.666666666666666	313282.7279856726	199465.1669361988	347350.5905208521
Founder	5	288	13	335052.5619752154	208751.9666857934	371691.41648046894
Founder	5	288	13.333333333333334	356071.1385518582	217708.41769256786	395204.5238410044
Founder	5	288	13.666666666666666	378829.6881714279	227863.50223054315	420676.8650858562
Founder	5	288	14	401921.2470867878	237870.60978677854	446534.68985480943
Founder	5	288	14.333333333333334	426294.66522741393	248518.68802517292	473841.07788481744
Founder	5	288	14.666666666666666	449395.0550811959	259448.50875811387	499733.0235274896
Founder	5	288	15	474869.63010379777	271312.98587470467	528298.6361693089
Founder	5	288	15.333333333333334	503381.19920462475	281909.30614607525	560284.5504060887
Founder	5	288	15.666666666666666	532770.0388943859	292821.5487164361	593270.1076754826
Founder	5	288	16	562988.4589444951	304242.0428656134	627202.2529822141
Founder	5	288	16.333333333333332	594685.4664967079	316164.9580717298	662810.6610618222
Founder	5	288	16.666666666666668	626089.2375991208	327717.277661883	698104.9281481728
Founder	5	288	17	656155.7729621391	340781.52175518894	731909.8436634715
Founder	5	288	17.333333333333332	688462.3396981579	353096.02431702946	768247.3839877245
Founder	5	288	17.666666666666668	725534.6155517343	364742.6552846615	809962.3730722596
Founder	5	288	18	765520.5703834865	376447.6380034335	854975.410947913
Founder	5	288	18.333333333333332	807060.494532127	387409.3216853718	901758.097074209
Founder	5	288	18.666666666666668	852950.5133031735	401247.1319582518	953462.7145209336
Founder	5	288	19	896953.7873621734	417773.0389459346	1003062.864543671
Founder	5	288	19.333333333333332	935624.1398568881	434850.9653439999	1046668.2145182706
Founder	5	288	19.666666666666668	977066.705742267	453223.43980602303	1093415.8714559975
Founder	5	288	20	1019457.5316094261	472767.24761770276	1141249.9120557962
Founder	5	288	20.333333333333332	1057076.5581147694	489412.16612388025	1183713.043059216
Founder	5	288	20.666666666666668	1095713.3464302565	504253.9477816387	1227337.822677756
Founder	5	288	21	1139444.8406453505	520650.1564307195	1276730.1539861113
Founder	5	288	21.333333333333332	1184662.0714921807	536755.2819700224	1327816.8035009755
Founder	5	288	21.666666666666668	1228118.7908015535	553909.3965008978	1376929.4206922674
Founder	5	288	22	1271888.5219376308	571641.8139132366	1426410.1215785027
Founder	5	288	22.333333333333332	1314932.181658767	589351.1086239645	1475083.568389517
Founder	5	288	22.666666666666668	1356020.1742811573	608163.6837668148	1521557.6957681852
Founder	5	288	23	1398068.6561122676	627702.2414149069	1569130.1141283968
Founder	5	288	23.333333333333332	1444326.024862917	646612.1176534643	1621477.816257745
Founder	5	288	23.666666666666668	1488108.4144675261	666412.6067617547	1671037.287479852
Founder	5	288	24	1531970.6768861257	687820.4962795457	1720699.1003961563
Founder	5	288	24.333333333333332	1576376.4918231876	705958.542608801	1770988.1520748313
Founder	5	288	24.666666666666668	1613967.2345197743	722562.0268382941	1813568.2629024307
Founder	5	288	25	1647352.2366245633	738148.4138062036	1851391.2006897805
Founder	5	288	25.333333333333332	1693266.582125813	757941.5086090277	1903419.2218444839
Founder	5	288	25.666666666666668	1740475.426057233	777783.9547974914	1956926.1081218235
Founder	5	288	26	1785006.4291006883	799361.3837249837	2007408.766354378
Founder	5	288	26.333333333333332	1831178.4984282528	819000.8819024733	2059762.6696423707
Founder	5	288	26.666666666666668	1884332.552432922	845395.7327552697	2120046.6736258515
Founder	5	288	27	1929664.8605435465	865903.1260853603	2171470.7199863545
Founder	5	288	27.333333333333332	1974703.121328588	884851.5153487372	2222570.966196012
Founder	5	288	27.666666666666668	2018530.0837269418	902757.9207184174	2272306.0080888206
Founder	5	288	28	2060771.8308995469	921003.0750414475	2320250.480396982
Founder	5	288	28.333333333333332	2103570.5016573924	934941.4851670815	2368835.238568853
Founder	5	288	28.666666666666668	2144532.9154388737	952408.7746252447	2415343.0455347192
Founder	5	288	29	2186291.441476932	969205.133539009	2462762.199649288
Founder	5	288	29.333333333333332	2228315.622907591	992534.4418323229	2510490.4798949985
Founder	5	288	29.666666666666668	2278301.203838875	1028082.8312918504	2567270.3409322137
Founder	5	288	30	2327074.394271548	1067977.12134994	2622682.815973532
Founder	5	288	30.333333333333332	2373456.915780779	1109507.438986963	2675387.983524479
Founder	5	288	30.666666666666668	2418567.824089181	1156358.0382245558	2726656.2595189027
Founder	5	288	31	2463984.806008534	1193496.7504466579	2778280.2669825195
Founder	5	288	31.333333333333332	2498645.4125250624	1216057.6353314095	2817683.082459548
Founder	5	288	31.666666666666668	2527956.479018973	1233038.9542367593	2851007.9246393763
Founder	5	288	32	2571230.610292582	1251590.7371444453	2900213.646476483
Founder	5	288	32.333333333333336	2611087.08139179	1270171.7499160138	2945539.228439124
Founder	5	288	32.666666666666664	2647697.933010761	1291109.6663479586	2987178.8021009364
Founder	5	288	33	2685932.421110866	1310325.8991776907	3030670.0416983515
Founder	5	288	33.333333333333336	2724588.3676267434	1332055.5861756152	3074645.8190021
Founder	5	288	33.666666666666664	2760472.9600542416	1351578.737957074	3115473.4056661553
Founder	5	288	34	2801835.5753025617	1369550.3182278615	3162538.9643153036
Founder	5	288	34.333333333333336	2845405.963136764	1391111.1276435666	3212122.8246999183
Founder	5	288	34.666666666666664	2887172.198411622	1419922.4153376347	3259659.3438802743
Founder	5	288	35	2929379.4449826865	1448142.0669130203	3307703.5018934826
Founder	5	288	35.333333333333336	2967570.0366399093	1473793.2558509966	3351180.403857169
Founder	5	288	35.666666666666664	3013137.034501634	1497178.207016472	3403060.7152822874
Founder	5	288	36	3051853.936061991	1517562.7385775174	3447146.8820253047
Founder	5	288	36.333333333333336	3091390.453850599	1534546.2516534324	3492171.037611255
Founder	5	288	36.666666666666664	3133653.0824413495	1554716.865311146	3540304.879066257
Founder	5	288	37	3169251.9094911455	1571941.3785643186	3580853.2817268907
Founder	5	288	37.333333333333336	3197735.956174267	1589267.4320387628	3613300.359862991
Founder	5	288	37.666666666666664	3238518.9947435656	1611126.863715277	3659761.7079268247
Founder	5	288	38	3281203.756175009	1638010.7070919948	3708394.670951592
Founder	5	288	38.333333333333336	3327892.357501569	1667250.3926979557	3761595.3241577665
Founder	5	288	38.666666666666664	3384588.86887855	1714811.8945593236	3826207.953307292
Founder	5	288	39	3438606.4859033693	1776979.4308796204	3887775.8699039808
Founder	5	288	39.333333333333336	3485918.019833783	1852601.7241917436	3941706.848194102
Founder	5	288	39.666666666666664	3531797.1171017764	1935224.3412094638	3994010.6785616926
Founder	5	288	40	3565532.0350571536	1998232.8036991716	4032473.245473124
Founder	5	288	40.333333333333336	3606169.0058899233	2036301.1808062429	4078809.0659766467
Founder	5	288	40.666666666666664	3643678.637157737	2046909.444316853	4121582.7564353347
Founder	5	288	41	3684212.0906695947	2043205.8962545067	4167808.665956154
Founder	5	288	41.333333333333336	3727533.3622965575	2033122.673909415	4217218.496010013
Founder	5	288	41.666666666666664	3773737.583897418	2016839.3338382163	4269921.619474029
Founder	5	288	42	3804796.912898239	2005920.6543127317	4305352.592606418
Founder	5	288	42.333333333333336	3839502.40766685	2012117.9087879562	4344945.72472322
Founder	5	288	42.666666666666664	3865785.492210672	2023986.479521237	4374932.247515502
Founder	5	288	43	3903439.930226442	2044327.9271160173	4417895.308374008
Founder	5	288	43.333333333333336	3942135.8528918778	2071145.6418648555	4462050.207293381
Founder	5	288	43.666666666666664	3992160.9890410164	2102019.7401486933	4519137.808630127
Founder	5	288	44	4052829.3943455564	2142817.4164093332	4588379.101500772
Founder	5	288	44.333333333333336	4127301.8484840835	2197832.2956141774	4673386.603586637
Founder	5	288	44.666666666666664	4195030.202011219	2272278.36991751	4750706.839753176
Founder	5	288	45	4261846.315815671	2374024.7958611776	4826995.6220875895
Founder	5	288	45.333333333333336	4318485.338852644	2480457.327655238	4891672.1321878
Founder	5	288	45.666666666666664	4368201.86410577	2562322.88520158	4948449.498066159
Founder	5	288	46	4411338.516323278	2619340.548964513	4997716.777529887
Founder	5	288	46.333333333333336	4454649.668350301	2647469.1835557986	5047187.310810183
Founder	5	288	46.666666666666664	4500750.726411144	2680676.348059463	5099848.819359345
Founder	5	288	47	4551708.819064555	2720927.0207068035	5158063.66532556
Founder	5	288	47.333333333333336	4599056.979140994	2760301.1766291456	5212159.26792079
Founder	5	288	47.666666666666664	4646446.396031399	2809280.2018832467	5266306.555868341
Founder	5	288	48	4688710.189273092	2860461.8728437424	5314601.093002327
Founder	5	288	48.333333333333336	4730852.810507362	2902856.528156451	5362760.703732424
Founder	5	288	48.666666666666664	4767730.324283983	2939335.47455719	5404906.343897623
Founder	5	288	49	4808530.157608304	2973978.9185752217	5451537.723156104
Founder	5	288	49.333333333333336	4845444.191469927	3002421.7650315696	5493730.685108931
Founder	5	288	49.666666666666664	4881482.6400360465	3025258.567713609	5534925.377567801
Founder	5	288	50	4922891.448875855	3047765.361558459	5582261.862907474
Founder	5	288	50.333333333333336	4964798.269255859	3062629.726373193	5630170.95703798
Founder	5	288	50.666666666666664	5006455.581296375	3078490.874167815	5677798.075497266
Founder	5	288	51	5051809.034899931	3098795.0591630307	5729654.695306656
Founder	5	288	51.333333333333336	5093225.284126103	3120070.724438133	5777012.879109916
Founder	5	288	51.666666666666664	5133534.408551119	3135684.302496593	5823108.117233512
Founder	5	288	52	5190544.310015731	3181770.28678402	5888306.456345972
Founder	5	288	52.333333333333336	5252372.263845298	3243495.6198903695	5959021.4747733455
Founder	5	288	52.666666666666664	5315821.256246709	3323641.8912250134	6031597.596993001
Founder	5	288	53	5384536.663692928	3453878.6083709183	6110205.675794324
Founder	5	288	53.333333333333336	5449355.834183941	3614224.9813299472	6184364.095217509
Founder	5	288	53.666666666666664	5498942.327892442	3706931.2250602893	6241099.952187574
Founder	5	288	54	5542910.150146068	3805624.5242584627	6291410.531784849
Founder	5	288	54.333333333333336	5590169.878595353	3894060.556348314	6345491.534444368
Founder	5	288	54.666666666666664	5650074.027180828	3969211.081293189	6414047.356704205
Founder	5	288	55	5708060.161569365	4030529.2694754903	6480413.803393927
Founder	5	288	55.333333333333336	5767446.958120701	4107617.2744271453	6548389.039998831
Founder	5	288	55.666666666666664	5828837.935900764	4199616.693635987	6618664.301341543
Founder	5	288	56	5879053.585884208	4265856.038729491	6676151.473457841
Founder	5	288	56.333333333333336	5917300.310882809	4265070.36228978	6719939.23876168
Founder	5	288	56.666666666666664	5959648.881980267	4273948.766142155	6768425.802896901
Founder	5	288	57	6000213.55795903	4282390.391022753	6814872.550285266
Founder	5	288	57.333333333333336	6037660.763268695	4288874.658220905	6857752.053064387
Founder	5	288	57.666666666666664	6085826.134530174	4348420.890960497	6912907.745783897
Founder	5	288	58	6129445.487783328	4396556.708450475	6962860.722674697
Founder	5	288	58.333333333333336	6166836.489092072	4437543.0981304385	7005683.286661464
Founder	5	288	58.666666666666664	6209972.035066222	4498441.968188379	7055087.500604734
Founder	5	288	59	6248147.565300386	4535517.889916491	7098813.220820556
Founder	5	288	59.333333333333336	6286164.641762137	4551934.7359284	7142359.616111031
Founder	5	288	59.666666666666664	6326176.244399077	4578549.271465656	7188192.947617573
Founder	5	288	60	6368157.723310306	4615693.165010675	7236285.316373359
Founder	5	288	60.333333333333336	6403003.6740155	4633910.535678397	7276205.4632504415
Founder	5	288	60.666666666666664	6449095.697911749	4694456.898161644	7329012.034392794
Founder	5	288	61	6489835.193115507	4740994.87019586	7375688.900497648
Founder	5	288	61.333333333333336	6529889.63954339	4788814.930563475	7421583.209232838
Founder	5	288	61.666666666666664	6572926.241558179	4838352.484261288	7470897.025093111
Founder	5	288	62	6616140.109785777	4884401.675637129	7520416.612990577
Founder	5	288	62.333333333333336	6649097.489328452	4900237.0387443695	7558184.871123421
Founder	5	288	62.666666666666664	6678690.896510449	4916142.640859328	7592099.410146041
Founder	5	288	63	6709125.102950819	4932570.911021634	7626978.797711224
Founder	5	288	63.333333333333336	6742110.798214477	4947801.523432958	7664783.798617828
Founder	5	288	63.666666666666664	6774776.816791551	4962712.411605775	7702223.904108921
Founder	5	288	64	6811882.776916112	4978296.210778523	7744754.627651267
Founder	5	288	64.33333333333333	6879360.772085922	5095851.369720228	7822102.50924857
Founder	5	288	64.66666666666667	6947691.477132585	5283117.493058232	7900434.131759563
Founder	5	288	65	7014054.405787963	5541988.604977634	7976515.989420789
Founder	5	288	65.33333333333333	7079287.1485629305	5840324.178274706	8051307.867526351
Founder	5	288	65.66666666666667	7139915.973187279	6155522.325651316	8120826.216272243
Founder	5	288	66	7173101.117042879	6156120.629813683	8158879.076645056
Founder	5	288	66.33333333333333	7203612.135484141	6151092.6246934915	8193866.828556921
Founder	5	288	66.66666666666667	7233932.977960341	6134630.422692825	8228637.698493634
Founder	5	288	67	7258918.4350065775	6133809.793966501	8257291.030784229
Founder	25	288	0	57343.778043790066	24615.492777653377	47881.000000000015
Founder	25	288	0.3333333333333333	57291.78389453886	24562.19202015537	47838.30010542996
Founder	25	288	0.6666666666666666	57214.04256464387	24418.06402929023	47774.4542975516
Founder	25	288	1	57245.346425157375	24254.60049005341	47800.1630628713
Founder	25	288	1.3333333333333333	57495.069326782876	24124.225368153828	48005.24346900411
Founder	25	288	1.6666666666666667	57990.761910029425	24078.003230215872	48412.278646757135
Founder	25	288	2	58892.75808008762	24215.860958145055	49152.80116973969
Founder	25	288	2.3333333333333335	60240.80327920107	24587.04550923878	50259.17479910651
Founder	25	288	2.6666666666666665	61993.85435340008	25200.300772354727	51697.338527046886
Founder	25	288	3	64084.90480875961	26027.559645599795	53411.91561414369
Founder	25	288	3.3333333333333335	66495.32181718323	27087.267219893223	55387.21985063378
Founder	25	288	3.6666666666666665	69249.65913582144	28323.455523459186	57642.92192494369
Founder	25	288	4	72234.01015442116	29712.475337507174	60085.33192622723
Founder	25	288	4.333333333333333	75384.37722142182	31205.88220786263	62661.80980498593
Founder	25	288	4.666666666666667	78873.28002533353	32809.053462719145	65513.088802138234
Founder	25	288	5	82633.4275246894	34508.00374616839	68583.71883807935
Founder	25	288	5.333333333333333	86617.20729352141	36305.73805135398	71834.46578503995
Founder	25	288	5.666666666666667	90832.73518252868	38182.37615862254	75271.64081372898
Founder	25	288	6	95361.91708120077	40124.24431434828	78961.63441211227
Founder	25	288	6.333333333333333	100048.45262344739	42108.62211150094	82776.7914102651
Founder	25	288	6.666666666666667	105281.98549841424	44268.8361498116	87033.77101120343
Founder	25	288	7	110803.51238327764	46423.57103678638	91521.23378824991
Founder	25	288	7.333333333333333	116924.16733836322	48667.812625954015	96491.3269618267
Founder	25	288	7.666666666666667	123750.88919150564	51032.12360984676	102029.71853658315
Founder	25	288	8	131174.7705111251	53673.080144557236	108046.87520984276
Founder	25	288	8.333333333333334	138928.7889377429	56297.51031542254	114325.63235677668
Founder	25	288	8.666666666666666	147476.03788836542	59244.04152943697	121240.03063801302
Founder	25	288	9	156416.89095609417	62220.011085058744	128465.78659968713
Founder	25	288	9.333333333333334	165875.75563185057	65407.06897474793	136102.7925176916
Founder	25	288	9.666666666666666	176026.05267662898	68656.49099783096	144290.09214135143
Founder	25	288	10	186948.2681486288	72083.44867465118	153091.3586074568
Founder	25	288	10.333333333333334	198710.90656337014	75624.32903040027	162560.39663397093
Founder	25	288	10.666666666666666	211234.7840739175	79348.82769922115	172632.11039702717
Founder	25	288	11	224395.85800287029	83174.6346238748	183205.67594736698
Founder	25	288	11.333333333333334	238811.8419099065	87343.75449940196	194775.7388158235
Founder	25	288	11.666666666666666	253700.98926066453	91523.88656093739	206713.49423741808
Founder	25	288	12	269260.2477791405	95995.06374637666	219176.21615053323
Founder	25	288	12.333333333333334	285617.4019947094	100583.22053926314	232265.27036530318
Founder	25	288	12.666666666666666	302542.1274468541	104935.66736638422	245795.5167785179
Founder	25	288	13	319567.830861246	109169.92877746571	259393.91911174014
Founder	25	288	13.333333333333334	337315.496325189	113592.36081254501	273556.2663470208
Founder	25	288	13.666666666666666	355437.44239255704	117830.29269910508	288004.6320903973
Founder	25	288	14	373867.7098125305	122057.72542696365	302686.38515915413
Founder	25	288	14.333333333333334	393431.79341944313	126802.90312956976	318258.3270455489
Founder	25	288	14.666666666666666	413385.93190001743	131513.42659613406	334127.6064155081
Founder	25	288	15	433255.7908249959	135917.31025089277	349917.33001994516
Founder	25	288	15.333333333333334	454193.70672308217	140590.118461197	366542.90604618157
Founder	25	288	15.666666666666666	475338.4418057584	145245.85260700405	383319.9047120739
Founder	25	288	16	495253.3836094729	149205.2415851815	399109.89860655094
Founder	25	288	16.333333333333332	515695.3569781393	153197.8243955596	415306.89595849323
Founder	25	288	16.666666666666668	536573.5432463418	157474.71509573545	431838.617590796
Founder	25	288	17	556969.710317726	161305.0863567888	447978.44152901747
Founder	25	288	17.333333333333332	576431.1323215533	164442.46108539635	463369.5121255113
Founder	25	288	17.666666666666668	599496.7374955213	169710.86580729927	481599.90025621513
Founder	25	288	18	622113.5251960701	175313.96271641005	499464.34374608897
Founder	25	288	18.333333333333332	647167.2038737137	181744.21694601752	519241.1649844735
Founder	25	288	18.666666666666668	674755.358166533	189168.7913191588	541004.0867645943
Founder	25	288	19	707488.6001565262	196473.0121444152	566806.7634820804
Founder	25	288	21.333333333333332	887661.275940268	238419.44488197536	708502.0589798708
Founder	25	288	21.666666666666668	916433.1897977964	243844.52684553602	731082.9021975192
Founder	25	288	22	942148.2601679574	251243.47671998982	751254.7808921474
Founder	25	288	22.333333333333332	966517.7591529037	258788.30459161135	770362.7757175417
Founder	25	288	22.666666666666668	988466.468707322	264568.97965572885	787565.8498769337
Founder	25	288	23	1010713.142739928	270713.8275044027	804996.0494236907
Founder	25	288	23.333333333333332	1036596.5086429316	279696.24722670857	825267.6484141661
Founder	25	288	23.666666666666668	1059460.3337739117	286654.2225309477	843167.4363221315
Founder	25	288	24	1081565.7488539643	293008.8183038788	860467.4288050556
Founder	25	288	24.333333333333332	1106426.5134985514	301384.2366627774	879916.8479924226
Founder	25	288	24.666666666666668	1131457.4259282777	309839.9942009459	899492.1134925995
Founder	25	288	25	1153778.8680665533	315936.59810058784	916942.4383973723
Founder	25	288	25.333333333333332	1180571.7717715546	325466.4373650787	937881.1082857872
Founder	25	288	25.666666666666668	1206763.6641262616	333975.76239129173	958342.5264988051
Founder	25	288	26	1232791.1235867376	341749.61339384236	978668.2471272463
Founder	25	288	26.333333333333332	1259276.223418961	348936.18756979535	999344.1054616417
Founder	25	288	26.666666666666668	1286887.528488137	356894.1253682238	1020891.5296588165
Founder	25	288	27	1312182.6276899623	362682.07103232277	1040624.741315058
Founder	25	288	27.333333333333332	1340531.1732186135	371784.051528437	1062732.5733155073
Founder	25	288	27.666666666666668	1366736.061884195	379913.9573624887	1083161.8105969634
Founder	25	288	28	1393596.7480541258	390535.8283271837	1104095.6157489086
Founder	25	288	28.333333333333332	1420909.5633557232	401328.6944558634	1125374.97808512
Founder	25	288	28.666666666666668	1446452.988411723	411329.5066377608	1145269.7174402683
Founder	25	288	29	1470941.7214811721	420136.7176108667	1164337.5695741344
Founder	25	288	29.333333333333332	1495583.7433198185	429869.05745614145	1183519.5045420728
Founder	25	288	29.666666666666668	1518277.1277899311	437192.77383175434	1201179.970994335
Founder	25	288	30	1541873.9369041796	447074.11513227643	1219538.8950064513
Founder	25	288	30.333333333333332	1565710.222158282	457651.5612847892	1238079.4430407435
Founder	25	288	30.666666666666668	1587667.7953528003	467921.9439935469	1255154.5624390442
Founder	25	288	31	1612360.4521453583	480658.9474277153	1274351.9559628959
Founder	25	288	31.333333333333332	1635052.3216366314	492239.30511309725	1291989.5620207153
Founder	25	288	31.666666666666668	1657963.7649621728	504330.7404439502	1309793.748065812
Founder	25	288	32	1681467.2748373984	517445.2869488512	1328053.8142067734
Founder	25	288	32.333333333333336	1703907.492592819	530050.709881978	1345483.8792671536
Founder	25	288	32.666666666666664	1723046.2859391521	540245.9293603264	1360346.6308193787
Founder	25	288	33	1745703.013490806	554494.7403042268	1377937.8202994629
Founder	25	288	33.333333333333336	1765690.452640226	565639.8764664191	1393453.3934008575
Founder	25	288	33.666666666666664	1786888.101669395	578150.9945466402	1409905.2537152441
Founder	25	288	34	1809499.745936653	590408.7228532416	1427451.000333772
Founder	25	288	34.333333333333336	1832112.523747294	601978.9578064439	1444994.0177128876
Founder	25	288	34.666666666666664	1851048.9189774517	609700.1153791634	1459682.1499975123
Founder	25	288	35	1870748.996793138	618589.3016487295	1474960.0130810305
Founder	25	288	35.333333333333336	1891243.4535314871	626825.2222738889	1490851.1254332776
Founder	25	288	35.666666666666664	1913968.7953678933	636510.1096812773	1508468.722118735
Founder	25	288	36	1938417.6326734398	647125.8854796074	1527418.5984514984
Founder	25	288	36.333333333333336	1965830.8281711666	659168.0679554561	1548661.4225306767
Founder	25	288	36.666666666666664	1994102.5180644803	671395.1966489828	1570564.3984560848
Founder	25	288	37	2020026.6979790174	681770.454411327	1590644.1901758192
Founder	25	288	37.333333333333336	2044382.5658400676	692270.3990418916	1609505.3674401082
Founder	25	288	37.666666666666664	2068397.6678093537	703001.6946021264	1628099.034468926
Founder	25	288	38	2090490.3338751304	714601.0467808755	1645201.1187507575
Founder	25	288	38.333333333333336	2111065.304641611	725175.2539184035	1661125.6688669564
Founder	25	288	38.666666666666664	2132983.1510142568	738636.2434663131	1678086.7641784037
Founder	25	288	39	2152555.174577019	750292.5536616956	1693230.1224082732
Founder	25	288	39.333333333333336	2173045.0112782647	763107.135213546	1709081.1875918908
Founder	25	288	39.666666666666664	2194844.2046389813	775533.1537944475	1725942.4790418008
Founder	25	288	40	2216517.326970541	787321.1552313648	1742703.5243259156
Founder	25	288	40.333333333333336	2237877.7770581013	797841.3902788089	1759220.123137329
Founder	25	288	40.666666666666664	2260397.119780055	809778.1641453109	1776630.0064519292
Founder	25	288	41	2281546.0818441743	820623.7259738572	1792977.837626095
Founder	25	288	41.333333333333336	2302685.864933716	831322.1715529452	1809316.0811090793
Founder	25	288	41.666666666666664	2323673.5681348145	842130.9527456939	1825534.344882363
Founder	25	288	42	2345690.9018483413	854295.7097147921	1842545.6655401245
Founder	25	288	42.333333333333336	2366301.258880771	864303.8399510428	1858467.5275080602
Founder	25	288	42.666666666666664	2387784.852066295	877158.2644951964	1875061.5504336013
Founder	25	288	43	2409391.286788276	889549.0596666909	1891747.9783352404
Founder	25	288	43.333333333333336	2432269.2284827824	902176.8128728438	1909413.6940141013
Founder	25	288	43.666666666666664	2452831.9715888794	911139.5916664664	1925289.342743515
Founder	25	288	44	2475108.7815759312	921637.5978685047	1942485.8806482626
Founder	25	288	44.333333333333336	2498392.3538693297	931343.3464517319	1960456.864356902
Founder	25	288	44.666666666666664	2520764.3536784058	941118.7776620188	1977721.671097054
Founder	25	288	45	2542584.8624663698	951596.323208117	1994558.4543680393
Founder	25	288	45.333333333333336	2566002.303307426	965188.1632326726	2012624.7911143708
Founder	25	288	45.666666666666664	2588962.570882589	978507.7743866165	2030335.7881421247
Founder	25	288	46	2608359.784993124	988803.7494481329	2045296.3161317604
Founder	25	288	46.333333333333336	2628072.500166602	1001750.8996946743	2060498.3052920809
Founder	25	288	46.666666666666664	2646316.9934749464	1013922.3702330426	2074566.3631683888
Founder	25	288	47	2665332.6529680714	1025233.5582824042	2089227.3570334394
Founder	25	288	47.333333333333336	2683611.438149496	1035828.6765512527	2103318.6009512846
Founder	25	288	47.666666666666664	2703612.416700148	1049009.0986496222	2118735.686252836
Founder	25	288	48	2723817.163767211	1060855.7656360674	2134307.9337760895
Founder	25	288	48.333333333333336	2745444.528335736	1074179.2392184034	2150974.5178945055
Founder	25	288	48.666666666666664	2764311.765735013	1086854.5172455157	2165512.3140554405
Founder	25	288	49	2783947.6232396443	1101693.3308236492	2180640.6219174336
Founder	25	288	49.333333333333336	2800612.714830385	1113933.427004657	2193478.745883407
Founder	25	288	49.666666666666664	2817166.8411708744	1127694.7113183797	2206230.141789457
Founder	25	288	50	2834146.219474046	1143299.0799106562	2219307.8218009667
Founder	25	288	50.333333333333336	2852939.8443049514	1160347.4668708185	2233781.3486388116
Founder	25	288	50.666666666666664	2871263.863386001	1175441.3006616808	2247891.707177582
Founder	25	288	51	2892713.599696099	1192196.8390645257	2264407.1331009204
Founder	25	288	51.333333333333336	2914016.075071556	1207322.4459661308	2280807.1791575677
Founder	25	288	51.666666666666664	2934880.9158304716	1221307.1787846691	2296868.392358966
Founder	25	288	52	2955451.8512380864	1235529.2242512677	2312701.5249782605
Founder	25	288	52.333333333333336	2976359.8919468983	1251073.5687319709	2328792.2637751163
Founder	25	288	52.666666666666664	2996416.491276437	1266539.0162658442	2344225.988466863
Founder	25	288	53	3015726.7069820156	1282264.9751748603	2359083.757874706
Founder	25	288	53.333333333333336	3034482.0234691766	1298063.3332485722	2373513.074665086
Founder	25	288	53.666666666666664	3052502.6205634703	1313137.5746815237	2387375.7556024613
Founder	25	288	54	3070637.601057421	1327460.9361854023	2401325.068286943
Founder	25	288	54.333333333333336	3088841.495703504	1341676.1200906185	2415326.0256240596
Founder	25	288	54.666666666666664	3108578.496072647	1356679.65140216	2430504.589157734
Founder	25	288	55	3128036.4408654603	1370218.885892602	2445466.9947559503
Founder	25	288	55.333333333333336	3148515.8317721924	1384189.8500239102	2461213.1983917346
Founder	25	288	55.666666666666664	3168569.762877721	1397252.5196110674	2476630.6406609556
Founder	25	288	56	3189280.413738762	1409948.9886569625	2492551.282775297
Founder	25	288	56.333333333333336	3210268.1705487357	1422073.315833603	2508683.2052413467
Founder	25	288	56.666666666666664	3232956.4170435816	1435796.3325845322	2526120.23127389
Founder	25	288	57	3255602.741896585	1450445.6420805007	2543523.029983447
Founder	25	288	57.333333333333336	3277656.076572201	1465358.3808522117	2560468.2243762757
Founder	25	288	57.666666666666664	3300805.3664581957	1482065.6084658494	2578253.5030205674
Founder	25	288	58	3323205.361354872	1498808.706324269	2595461.1542087463
Founder	25	288	58.333333333333336	3344385.9479603525	1514306.6936504168	2611730.301112522
Founder	25	288	58.666666666666664	3365520.7324849023	1528537.077007418	2627962.5763444467
Founder	25	288	59	3387453.036313144	1543929.0854330282	2644805.6013435945
Founder	25	288	59.333333333333336	3408094.589612224	1557279.0383524795	2660655.7481273115
Founder	25	288	59.666666666666664	3429696.9955099216	1573232.6303054919	2677242.01834618
Founder	25	288	60	3450856.233766285	1589762.5199184208	2693486.358619903
Founder	25	288	60.333333333333336	3470821.9745176253	1606690.8186079867	2708812.925238458
Founder	25	288	60.666666666666664	3489133.8476057393	1622518.4313090122	2722868.6354768416
Founder	25	288	61	3508362.75799801	1641991.0683907126	2737626.9325738214
Founder	25	288	61.333333333333336	3525892.863810061	1659477.231317497	2751080.2272816487
Founder	25	288	61.666666666666664	3543351.5589767033	1677281.1829343308	2764477.6244504647
Founder	25	288	62	3559932.282255448	1693616.8006295946	2777200.28039952
Founder	25	288	62.333333333333336	3575207.96834345	1709522.0546267224	2788920.6970025445
Founder	25	288	62.666666666666664	3588636.624586813	1723285.268177501	2799223.2813637923
Founder	25	288	63	3601409.1827824004	1734783.151243383	2809021.912645777
Founder	25	288	63.333333333333336	3621332.9160618754	1753378.1985166713	2824305.518074574
Founder	25	288	63.666666666666664	3642538.017710432	1773279.7310218469	2840570.548049939
Founder	25	288	64	3666504.0893481066	1795111.5031687797	2858951.459807623
Founder	25	288	64.33333333333333	3687387.401105787	1812414.7063890407	2874966.418999296
Founder	25	288	64.66666666666667	3707345.3434393792	1829328.1525312408	2890270.337247681
Founder	25	288	65	3721414.517751969	1837872.5080630379	2901057.8832743065
Founder	25	288	65.33333333333333	3736527.052979017	1847619.8582310437	2912644.6790662683
Founder	25	288	65.66666666666667	3750470.0232996973	1854443.6975911413	2923334.084109017
Founder	25	288	66	3772153.7605378535	1869333.267124673	2939956.6643454265
Founder	25	288	66.33333333333333	3792971.7841719477	1883649.5546168045	2955914.1155444677
Founder	25	288	66.66666666666667	3811387.8413853333	1896899.6520384564	2970029.207259495
Founder	25	288	67	3818012.2094359035	1896136.21209223	2975106.216997935
Founder	50	288	0	57753.78461747646	23461.66949813649	47881.000000000015
Founder	50	288	0.3333333333333333	57753.73777560489	23398.840579676453	47880.96182958539
Founder	50	288	0.6666666666666666	57710.776450007514	23266.46792205384	47845.95336389459
Founder	50	288	1	57646.85072583775	23099.11346491341	47793.860535485626
Founder	50	288	1.3333333333333333	57651.488689473044	22985.19487442216	47797.64002755226
Founder	50	288	1.6666666666666667	57769.64857227882	22943.750294323378	47893.92715867268
Founder	50	288	2	58126.5079705137	23096.455113813314	48184.70736883385
Founder	50	288	2.3333333333333335	58866.96974186534	23475.256325795413	48787.96164437275
Founder	50	288	2.6666666666666665	59970.855157050806	24063.847609665037	49687.05682095157
Founder	50	288	3	61465.67462538385	24849.578491548687	50904.110862246445
Founder	50	288	3.3333333333333335	63302.06611860989	25806.399234430948	52398.575042765086
Founder	50	288	3.6666666666666665	65452.53116801453	26889.454030406352	54147.693119653326
Founder	50	288	4	67913.17698645976	28084.690429456194	56147.898677348865
Founder	50	288	4.333333333333333	70672.04153608152	29361.229705440677	58389.048490964306
Founder	50	288	4.666666666666667	73711.01565652425	30740.354813803977	60856.01483004727
Founder	50	288	5	77072.41642821267	32216.03119937765	63582.696815869116
Founder	50	288	5.333333333333333	80741.22488136179	33736.94470352199	66556.4223753108
Founder	50	288	5.666666666666667	84848.84950435496	35282.18866226327	69883.0906843337
Founder	50	288	6	89272.44738339448	36897.28734677963	73462.58252815122
Founder	50	288	6.333333333333333	93992.96808406209	38568.00268994882	77278.99742839835
Founder	50	288	6.666666666666667	99014.96571390695	40308.26925919609	81335.55426894239
Founder	50	288	7	104345.60654882496	42132.536160526266	85637.57499295817
Founder	50	288	7.333333333333333	109873.19354372963	44053.107078607645	90094.57218220676
Founder	50	288	7.666666666666667	115788.61684100413	46089.446169847215	94860.04709171056
Founder	50	288	8	122161.22559206837	48248.61676595977	99989.17953687975
Founder	50	288	8.333333333333334	128969.9103516591	50502.49400151704	105464.24778276647
Founder	50	288	8.666666666666666	136308.74987363588	52893.48920439209	111360.10229495996
Founder	50	288	9	144205.8582897374	55431.77900630744	117698.40245459454
Founder	50	288	9.333333333333334	152735.1186935215	58090.23365844538	124537.41697894415
Founder	50	288	9.666666666666666	161930.87848058005	60883.76462164925	131903.5450383388
Founder	50	288	10	171874.64744053397	63844.33492361837	139860.8176607339
Founder	50	288	10.333333333333334	182557.04565884813	66947.63465263827	148400.40268255756
Founder	50	288	10.666666666666666	193967.02332195983	70163.85567975853	157512.19458307358
Founder	50	288	11	206159.44937736678	73490.75909274656	167238.71843189723
Founder	50	288	11.333333333333334	218905.21294337744	76991.72503538184	177396.1609117808
Founder	50	288	11.666666666666666	232784.56311920373	80548.19425847419	188445.50625885095
Founder	50	288	12	247540.5019113831	84176.46657784676	200180.36340779767
Founder	50	288	12.333333333333334	263292.72418950323	87891.11622154518	212694.34507975515
Founder	50	288	12.666666666666666	279868.3811071498	91642.31665690702	225848.67509087163
Founder	50	288	13	297502.103123546	95357.09015516622	239828.07133469914
Founder	50	288	13.333333333333334	315559.2805618491	99084.35399935955	254128.49142846398
Founder	50	288	13.666666666666666	334411.4758780232	102851.72830633378	269043.6093661704
Founder	50	288	14	353993.9826158623	106608.91271946116	284521.3078638152
Founder	50	288	14.333333333333334	374298.3657483788	110412.6381707613	300554.11603619624
Founder	50	288	14.666666666666666	394872.6694913664	114317.08381436857	316784.89379438385
Founder	50	288	15	416629.686245537	118259.68254713707	333932.9816275781
Founder	50	288	15.333333333333334	439126.1053876853	122385.24568583025	351647.7473904117
Founder	50	288	15.666666666666666	462380.5117803059	126688.10594244779	369943.08744461386
Founder	50	288	16	486229.80611706356	131109.65812526023	388690.1191124514
Founder	50	288	16.333333333333332	511053.86496831593	135741.4749787969	408186.6878224474
Founder	50	288	16.666666666666668	535920.5132590682	140596.71038668422	427700.4718237039
Founder	50	288	17	561139.2559022616	145587.63478453472	447474.7491044755
Founder	50	288	17.333333333333332	585912.91966817	150706.08493648193	466885.2364764556
Founder	50	288	17.666666666666668	611040.941154223	156102.49506961895	486559.03567828686
Founder	50	288	18	638558.7323658298	162782.9266408655	508088.0392892569
Founder	50	288	18.333333333333332	667217.1810712141	170595.28094535478	530492.6026886905
Founder	50	288	18.666666666666668	697234.1726484527	178903.17726556578	553941.6157034549
Founder	50	288	19	731815.5364109158	185974.75149463443	580934.9259507429
Founder	50	288	21.333333333333332	929760.6695474876	235375.12034431435	735054.0585691934
Founder	50	288	21.666666666666668	961179.9086166276	241508.77024731855	759461.9109863328
Founder	50	288	22	989053.1460058634	249910.73007457057	781103.640149614
Founder	50	288	22.333333333333332	1016313.4364249925	259650.87737015344	802259.3683370175
Founder	50	288	22.666666666666668	1044543.1058039884	270159.46672319685	824157.1744830749
Founder	50	288	23	1072956.4600891254	281255.6365433637	846187.248895747
Founder	50	288	23.333333333333332	1102527.538401767	293508.52277858986	869104.3674963476
Founder	50	288	23.666666666666668	1131956.7139584196	306699.34580097	891901.0799086235
Founder	50	288	24	1162049.0724813014	320711.5592448942	915201.037470172
Founder	50	288	24.333333333333332	1193306.3892177213	336204.64542004664	939392.0817188419
Founder	50	288	24.666666666666668	1227129.070741379	355231.66633200605	965556.3493932465
Founder	50	288	25	1262311.411637854	376232.2160010308	992759.3329599022
Founder	50	288	25.333333333333332	1299204.2949228038	397907.3296940568	1021270.9907827375
Founder	50	288	25.666666666666668	1337416.0539307354	421366.01145351265	1050787.317311062
Founder	50	288	26	1376276.7323914948	443911.3579276975	1080790.1106052527
Founder	50	288	26.333333333333332	1413817.433040012	462384.4496467493	1109760.0425344587
Founder	50	288	26.666666666666668	1450903.886597904	480215.80810321757	1138366.5195980882
Founder	50	288	27	1488496.0217245014	498819.3804204121	1167350.2951985025
Founder	50	288	27.333333333333332	1524563.1625381466	515840.52811934095	1195146.522909097
Founder	50	288	27.666666666666668	1559460.2178421277	532639.7399447456	1222030.2847386159
Founder	50	288	28	1593892.3089514133	550488.6746624834	1248545.768732135
Founder	50	288	28.333333333333332	1627120.197952183	567403.497640707	1274124.6323320672
Founder	50	288	28.666666666666668	1659736.5952827	584214.8861028575	1299224.0822514424
Founder	50	288	29	1691936.473410642	601304.660032617	1323994.7333505535
Founder	50	288	29.333333333333332	1723630.1450690432	619073.9045601321	1348368.0994488772
Founder	50	288	29.666666666666668	1754360.8994857613	636124.0103702248	1371993.6357292822
Founder	50	288	30	1784370.7074549848	653357.5996599727	1395058.0852366886
Founder	50	288	30.333333333333332	1812815.4563659525	669821.3753793896	1416913.5631167048
Founder	50	288	30.666666666666668	1841592.8488900505	687431.257020328	1439018.6611218734
Founder	50	288	31	1869771.0568692829	704511.6255993427	1460657.777639282
Founder	50	288	31.333333333333332	1897064.0738576725	720913.2334197516	1481611.8059084106
Founder	50	288	31.666666666666668	1924026.3766654676	737449.9223545477	1502306.869387703
Founder	50	288	32	1950580.9305278277	754395.6634837269	1522684.1161063062
Founder	50	288	32.333333333333336	1976720.9470962991	771084.8698115745	1542738.6253128417
Founder	50	288	32.666666666666664	2002843.7769758098	788763.6988401626	1562775.4192145169
Founder	50	288	33	2029510.9558263835	807724.075139598	1583225.132543704
Founder	50	288	33.333333333333336	2056173.3525132146	826445.7039913987	1603666.5857890774
Founder	50	288	33.666666666666664	2082927.1825634546	844550.3587982456	1624173.583741891
Founder	50	288	34	2109258.2080238787	861003.295501501	1644352.101478507
Founder	50	288	34.333333333333336	2135159.244902001	875996.2632479202	1664196.899575517
Founder	50	288	34.666666666666664	2160547.1824325486	889771.7627181167	1683644.5776458064
Founder	50	288	35	2186373.7539111837	903724.3103848848	1703424.2495246
Founder	50	288	35.333333333333336	2212674.90953639	917740.7527853665	1723563.2836111116
Founder	50	288	35.666666666666664	2240587.1396209127	932503.7489236328	1744931.4565588855
Founder	50	288	36	2269777.6367114214	947677.9868686891	1767273.337492797
Founder	50	288	36.333333333333336	2299577.1858658404	962847.2082325147	1790076.3089956187
Founder	50	288	36.666666666666664	2329445.8785380493	977727.6860480297	1812927.1201761109
Founder	50	288	37	2359167.815278119	992609.7968850837	1835660.684120404
Founder	50	288	37.333333333333336	2387583.7464927724	1007503.3850437893	1857390.7375305363
Founder	50	288	37.666666666666664	2414883.3313111854	1022260.0571374961	1878262.940236156
Founder	50	288	38	2441354.6408758694	1037426.6645192616	1898498.0229045658
Founder	50	288	38.333333333333336	2467040.255444219	1052971.6289283228	1918128.921701833
Founder	50	288	38.666666666666664	2492670.17155657	1069508.9909641545	1937713.7683108067
Founder	50	288	39	2518000.4750973433	1086333.6795645787	1957066.2859380632
Founder	50	288	39.333333333333336	2543347.420611296	1103130.81746738	1976428.1863009385
Founder	50	288	39.666666666666664	2569038.5212415545	1119734.030374289	1996049.6116817903
Founder	50	288	40	2595087.6463978672	1135996.1481874483	2015941.0509838664
Founder	50	288	40.333333333333336	2619343.4524628012	1150020.1028207648	2034460.0191832725
Founder	50	288	40.666666666666664	2643988.20110583	1164066.1606086832	2053272.936753688
Founder	50	288	41	2668651.025614483	1178570.9205769128	2072096.6513173988
Founder	50	288	41.333333333333336	2693539.672355493	1193500.6334091455	2091089.7077446587
Founder	50	288	41.666666666666664	2719755.819752966	1210378.9256865408	2111092.56378766
Founder	50	288	42	2748046.3769035577	1229485.4911052943	2132674.49212201
Founder	50	288	42.333333333333336	2776935.8046816583	1249363.8624716466	2154709.3590582907
Founder	50	288	42.666666666666664	2805958.276034197	1269486.230948379	2176841.7560366937
Founder	50	288	43	2835467.5194206336	1288997.9000407273	2199341.3502819273
Founder	50	288	43.333333333333336	2864741.216312313	1306743.5793117997	2221657.394105337
Founder	50	288	43.666666666666664	2894143.8264220105	1323815.8425190852	2244067.7869254528
Founder	50	288	44	2923537.4552885457	1340735.3023832506	2266467.443411627
Founder	50	288	44.333333333333336	2952820.1845645984	1357408.6329046802	2288778.7591325445
Founder	50	288	44.666666666666664	2981391.600709984	1374418.6974384326	2310544.459278735
Founder	50	288	45	3008808.27372093	1391318.3660701907	2331427.122816677
Founder	50	288	45.333333333333336	3035569.006937943	1408724.540224586	2351807.033907738
Founder	50	288	45.666666666666664	3061628.9185755183	1426327.260593917	2371650.274678877
Founder	50	288	46	3087375.796238591	1444467.6982886964	2391252.320573654
Founder	50	288	46.333333333333336	3112755.6565375556	1463514.3485549297	2410572.2070438904
Founder	50	288	46.666666666666664	3137718.9984595184	1482778.1209215214	2429572.400129928
Founder	50	288	47	3163108.236851349	1501942.2393039968	2448894.10218635
Founder	50	288	47.333333333333336	3188779.3076759176	1520924.4029707822	2468427.588266795
Founder	50	288	47.666666666666664	3214679.282698998	1539987.7133341283	2488132.5261518504
Founder	50	288	48	3240658.5453734696	1557913.9563088776	2507895.059934185
Founder	50	288	48.333333333333336	3266593.4414304863	1575552.685747812	2527621.141971402
Founder	50	288	48.666666666666664	3291391.7531228345	1593108.585776068	2546480.23334419
Founder	50	288	49	3314895.266774209	1610767.6291358965	2564352.389325968
Founder	50	288	49.333333333333336	3337400.5836136243	1628614.789035606	2581463.4821213502
Founder	50	288	49.666666666666664	3359398.1925177467	1648100.6845126802	2598186.6510887225
Founder	50	288	50	3381262.8387441677	1668807.4446163818	2614806.882893757
Founder	50	288	50.333333333333336	3403595.0783960205	1689740.0951003844	2631780.655159786
Founder	50	288	50.666666666666664	3427233.229057237	1710997.982087333	2649744.9198323647
Founder	50	288	51	3451871.1517183394	1732014.3933395222	2668466.7258133367
Founder	50	288	51.333333333333336	3477814.1360016614	1752590.2126608088	2688177.749731757
Founder	50	288	51.666666666666664	3504205.3781878785	1772824.1293116747	2708226.7727186987
Founder	50	288	52	3530412.0992284976	1792907.8823359816	2728133.063086423
Founder	50	288	52.333333333333336	3555108.5862088143	1811883.474535194	2746889.8863287796
Founder	50	288	52.666666666666664	3580203.04317814	1832380.888750945	2765946.683325244
Founder	50	288	53	3604659.5585126025	1853297.5777417936	2784516.828149242
Founder	50	288	53.333333333333336	3629478.7247409783	1875283.8053314923	2803360.136142141
Founder	50	288	53.666666666666664	3655539.304001389	1898110.602289819	2823143.583844719
Founder	50	288	54	3683019.632361696	1921661.964433444	2844002.198311006
Founder	50	288	54.333333333333336	3710435.1998643265	1944496.368106331	2864809.0052060434
Founder	50	288	54.666666666666664	3738445.6532260217	1967246.5675412107	2886064.580960623
Founder	50	288	55	3766972.3083958332	1989161.1667221817	2907709.0749902986
Founder	50	288	55.333333333333336	3796665.4788225596	2011511.8133388918	2930235.681711122
Founder	50	288	55.666666666666664	3827340.386850495	2033988.6888194191	2953503.9167863713
Founder	50	288	56	3858029.066146993	2055341.54340384	2976779.4072918803
Founder	50	288	56.333333333333336	3889059.039693107	2076407.8044857855	3000310.5301821684
Founder	50	288	56.666666666666664	3920282.6514090593	2097749.872061544	3023985.2555579264
Founder	50	288	57	3950520.546088951	2119035.7479476407	3046909.506076515
Founder	50	288	57.333333333333336	3980605.631174977	2140442.8734777975	3069714.92966105
Founder	50	288	57.666666666666664	4011286.280845762	2162685.290463721	3092968.7746507013
Founder	50	288	58	4041990.228521183	2185723.6822671765	3116237.2334814733
Founder	50	288	58.333333333333336	4072928.7198876683	2208553.1287505166	3139680.380466531
Founder	50	288	58.666666666666664	4104525.762306567	2231152.198087481	3163619.3915108205
Founder	50	288	59	4136363.884465441	2254022.50696504	3187737.8659352604
Founder	50	288	59.333333333333336	4168027.275329466	2276926.4715655544	3211720.827328888
Founder	50	288	59.666666666666664	4199468.050975735	2299949.9797629076	3235532.0897854418
Founder	50	288	60	4230293.199470918	2324076.5471803513	3258874.1557643097
Founder	50	288	60.333333333333336	4259722.485335214	2348455.8277907246	3281156.503448134
Founder	50	288	60.666666666666664	4288286.372470826	2372555.2025643284	3302781.098234741
Founder	50	288	61	4316368.856762593	2396797.862418508	3324038.840915499
Founder	50	288	61.333333333333336	4343694.601189192	2420794.644328744	3344721.480203188
Founder	50	288	61.666666666666664	4370548.978702975	2444705.44322493	3365045.1781054605
Founder	50	288	62	4398244.470158536	2470442.7953259577	3386003.2042336273
Founder	50	288	62.333333333333336	4425878.004677257	2497556.430217294	3406912.0967612206
Founder	50	288	62.666666666666664	4453810.492616949	2525428.5787761337	3428044.9237665874
Founder	50	288	63	4482352.4122549025	2553342.850954766	3449636.48660283
Founder	50	288	63.333333333333336	4511430.375675719	2581084.3212840776	3471631.1417730083
Founder	50	288	63.666666666666664	4540637.1716374485	2607922.383154133	3493720.806258058
Founder	50	288	64	4570351.30811109	2634405.6642917395	3516191.689199657
Founder	50	288	64.33333333333333	4599824.323870343	2660913.0696387757	3538477.760475141
Founder	50	288	64.66666666666667	4628173.706414578	2686517.3109359588	3559911.890704712
Founder	50	288	65	4657179.771940154	2713127.723489698	3581840.1961992057
Founder	50	288	65.33333333333333	4685707.448376501	2739304.9878285523	3603404.5663782177
Founder	50	288	65.66666666666667	4715040.726732969	2766641.7266889494	3625575.558884803
Founder	50	288	66	4744660.302709479	2794561.184215357	3647960.5510003935
Founder	50	288	66.33333333333333	4775301.986737881	2824085.9837270053	3671115.486950197
Founder	50	288	66.66666666666667	4805773.65537219	2853327.5678382274	3694139.428417281
Founder	50	288	67	4831896.573563362	2876792.571126425	3713875.530703043
Founder	50	288	67.33333333333333	4852673.655512572	2893465.1149113383	3729571.502042136
Founder	50	288	67.66666666666667	4861323.8147009015	2896770.01041269	3736105.894418631
Founder	400	288	0	57738.08897874914	32530.929508474896	47880.999999999956
Founder	400	288	0.3333333333333333	57626.83092979986	32493.69378512473	47790.30986792195
Founder	400	288	0.6666666666666666	57280.35020444422	32351.953657160182	47507.86273837182
Founder	400	288	1	56814.92159323654	32069.72576724966	47128.40470358879
Founder	400	288	1.3333333333333333	56413.570757353686	31873.913002295805	46801.145859619224
Founder	400	288	1.6666666666666667	56112.718138812095	31678.402566438646	46555.806549585795
Founder	400	288	2	56027.067898494905	31581.646190204418	46485.95638477253
Founder	400	288	2.3333333333333335	56284.63894551253	31670.795274226868	46696.00728100271
Founder	400	288	2.6666666666666665	56751.10623599433	31892.67008674568	47076.3727254371
Founder	400	288	3	57408.42332387907	32216.33143771378	47612.26987160283
Founder	400	288	3.3333333333333335	58282.36410550975	32602.89392603453	48324.61384538418
Founder	400	288	3.6666666666666665	59306.78297186795	33038.733387706074	49159.37965093736
Founder	400	288	4	60486.80564702865	33500.44824350985	50120.637134773155
Founder	400	288	4.333333333333333	61802.45755073306	33980.15695412079	51192.00226209576
Founder	400	288	4.666666666666667	63317.34878244977	34454.966275558094	52425.130710904734
Founder	400	288	5	64933.02566050599	34962.34990904105	53739.744362536505
Founder	400	288	5.333333333333333	66686.01039364922	35470.7944161443	55165.4488820893
Founder	400	288	5.666666666666667	68523.97008630654	35966.618244968915	56659.57681151775
Founder	400	288	6	70432.91551963103	36475.19640748133	58210.68690735942
Founder	400	288	6.333333333333333	72345.31768017894	37015.76246938067	59763.8860943428
Founder	400	288	6.666666666666667	74278.98831902155	37579.23550911108	61333.64631124018
Founder	400	288	7	76277.32257668964	38170.73260990205	62955.167827336416
Founder	400	288	7.333333333333333	78275.8634195891	38828.48208842746	64576.13160154509
Founder	400	288	7.666666666666667	80293.90902631627	39551.477512142716	66212.19828439066
Founder	400	288	8	82390.04193849467	40319.40587335461	67910.82873379452
Founder	400	288	8.333333333333334	84498.31775536845	41165.23519501329	69618.55516267363
Founder	400	288	8.666666666666666	86651.02179207762	42069.476483052305	71361.51847218128
Founder	400	288	9	88857.36212158951	43053.4073709964	73147.14210584095
Founder	400	288	9.333333333333334	91112.5064765793	44094.825597545605	74971.48144611972
Founder	400	288	9.666666666666666	93459.49585104032	45176.56190720583	76869.30209390393
Founder	400	288	10	95918.00992717633	46287.556628478356	78856.43153260586
Founder	400	288	10.333333333333334	98346.11132948665	47442.370140148065	80818.12591136184
Founder	400	288	10.666666666666666	100896.90898061416	48584.87559608686	82878.05793504839
Founder	400	288	11	103533.38165565107	49711.20945091276	85006.24388428855
Founder	400	288	11.333333333333334	106152.05070674227	50851.4114705452	87119.142642857
Founder	400	288	11.666666666666666	108786.56501559692	51996.34491987046	89243.92837801806
Founder	400	288	12	111547.0528514573	53123.22592219422	91469.3720069108
Founder	400	288	12.333333333333334	114220.41097938007	54273.433846977205	93623.67717496061
Founder	400	288	12.666666666666666	117004.08722624225	55394.06866265254	95865.96679795686
Founder	400	288	13	119755.15476004343	56508.07788197969	98081.09474080488
Founder	400	288	13.333333333333334	122596.38074229965	57578.75596315116	100367.90551531562
Founder	400	288	13.666666666666666	125345.03204659579	58643.32294599521	102579.34464287988
Founder	400	288	14	128205.42184105958	59687.7920205211	104879.80462510053
Founder	400	288	14.333333333333334	131002.91179380972	60734.760942328896	107128.82988878067
Founder	400	288	14.666666666666666	133878.11123641892	61776.111232060925	109439.47497974146
Founder	400	288	15	136736.64849462314	62830.357219775105	111735.88966233311
Founder	400	288	15.333333333333334	139620.16033451835	63909.4056478002	114051.53741587233
Founder	400	288	15.666666666666666	142540.21602987198	64990.01591879867	116395.70026896981
Founder	400	288	16	145425.52087768048	66085.96547846496	118711.16047731518
Founder	400	288	16.333333333333332	148381.06460122607	67140.80058823153	121082.17440489931
Founder	400	288	16.666666666666668	151362.58071466914	68178.52738115957	123473.2071517373
Founder	400	288	17	154365.22831695774	69205.5218930077	125880.37371602764
Founder	400	288	17.333333333333332	157399.25328933456	70187.44143791603	128311.88301706413
Founder	400	288	17.666666666666668	160505.53409376	71157.50637849524	130800.47025897136
Founder	400	288	18	163553.24586004854	72158.9349987214	133241.33585656038
Founder	400	288	18.333333333333332	166711.34587506257	73140.78867229365	135769.7906617309
Founder	400	288	18.666666666666668	170257.44267206424	74311.0147035618	138607.91165629323
Founder	400	288	19	174675.2085712529	76247.30815972466	142142.26423850853
Founder	400	288	21.333333333333332	202908.90032797295	85808.29217471741	164695.61131433112
Founder	400	288	21.666666666666668	207932.19244723205	87699.01398608924	168702.4233135252
Founder	400	288	22	212365.10511294194	88881.62297657017	172236.9471649897
Founder	400	288	22.333333333333332	216776.5522365173	89872.17796711884	175753.10523114377
Founder	400	288	22.666666666666668	221325.88856441248	90927.18345529007	179377.88910426488
Founder	400	288	23	226058.52624681106	92032.47444246514	183147.37279730637
Founder	400	288	23.333333333333332	230976.4271828061	93200.86157264205	187062.98918373478
Founder	400	288	23.666666666666668	236082.21992188794	94400.59967869692	191126.69884940083
Founder	400	288	24	241283.50799999788	95700.0238751372	195264.8708265029
Founder	400	288	24.333333333333332	247124.55453358355	97142.24648984456	199910.22410674562
Founder	400	288	24.666666666666668	252988.21336649626	98695.88788311205	204571.67545641496
Founder	400	288	25	259248.52578221413	100348.340197468	209546.42089716886
Founder	400	288	25.333333333333332	265571.4005755313	102142.28919305123	214568.7998115482
Founder	400	288	25.666666666666668	272475.74333794863	104110.24962061565	220050.7197247834
Founder	400	288	26	279520.4086958088	106273.037848794	225641.60929103024
Founder	400	288	26.333333333333332	287080.8757485316	108611.83279526002	231639.18226637304
Founder	400	288	26.666666666666668	294749.6920464323	111091.08471857983	237719.95210137632
Founder	400	288	27	302993.136462797	113751.75160612944	244253.34671056486
Founder	400	288	27.333333333333332	311347.96775921725	116473.39116289162	250871.92561328242
Founder	400	288	27.666666666666668	319927.72376388806	119190.37364313894	257665.53171556297
Founder	400	288	28	328427.48931913404	121910.60629436107	264392.73259520554
Founder	400	288	28.333333333333332	337452.4220156386	124787.51975014879	271532.3290406367
Founder	400	288	28.666666666666668	346445.99292945553	127721.74815313607	278643.87225012016
Founder	400	288	29	355808.9518326794	130816.38470337822	286044.15651334694
Founder	400	288	29.333333333333332	365183.99809249304	133970.57352754255	293450.66333260405
Founder	400	288	29.666666666666668	375091.60369333345	137387.47837058548	301274.3782328457
Founder	400	288	30	384768.31348529836	140775.05019641406	308912.3557539686
Founder	400	288	30.333333333333332	394971.0522945846	144422.2880138974	316961.98604252806
Founder	400	288	30.666666666666668	404891.3034014346	147951.77452684633	324785.3379644541
Founder	400	288	31	415588.5555164304	151959.94186136712	333217.78719953407
Founder	400	288	31.333333333333332	426298.9043520042	155959.39772729384	341656.84794963733
Founder	400	288	31.666666666666668	437634.86241783114	160380.0963714906	350584.9070513167
Founder	400	288	32	448414.1868541535	164537.47660490588	359070.90471236815
Founder	400	288	32.333333333333336	459912.5426244055	169262.09521454028	368119.121251666
Founder	400	288	32.666666666666664	471368.8544628445	173939.0236585195	377130.411784787
Founder	400	288	33	483199.29368692817	178965.16019150638	386432.0597027252
Founder	400	288	33.333333333333336	494750.9568825627	183821.89280300395	395510.7683524271
Founder	400	288	33.666666666666664	507645.01065262273	189544.0382027293	405640.221253496
Founder	400	288	34	520169.30201996793	194918.2357541462	415474.98572049866
Founder	400	288	34.333333333333336	532912.026605049	200427.283404435	425477.12750836357
Founder	400	288	34.666666666666664	546295.4535594883	206328.23599141435	435977.78102823184
Founder	400	288	35	559417.751010165	211906.60074721513	446269.28710792406
Founder	400	288	35.333333333333336	573459.2982524036	218098.34591501672	457277.1768109655
Founder	400	288	35.666666666666664	588408.3519666548	224792.8168962121	468991.45271430037
Founder	400	288	36	603451.5346083209	231377.08682392925	480774.3604730685
Founder	400	288	36.333333333333336	618430.0908720791	237730.5012777792	492501.66553043696
Founder	400	288	36.666666666666664	635396.2066354362	245567.92017843004	505779.258785977
Founder	400	288	37	651462.305932051	252621.04427687553	518346.92154542677
Founder	400	288	37.333333333333336	667231.995355141	259579.8436165953	530677.5717857314
Founder	400	288	37.666666666666664	683711.633848745	267176.68311913183	543558.0314889989
Founder	400	288	38	699472.3966399935	274438.78578204155	555871.6587390148
Founder	400	288	38.333333333333336	714423.3003870815	281285.7713209728	567548.176582012
Founder	400	288	38.666666666666664	729938.0741749539	288862.49783146934	579660.6620957229
Founder	400	288	39	745358.877976876	296408.9241601661	591695.4289470053
Founder	400	288	39.333333333333336	761277.1666235161	304413.8478106306	604113.987151543
Founder	400	288	39.666666666666664	778132.7361779799	313069.1517548193	617258.928960624
Founder	400	288	40	795223.1908380371	321803.38135411	630582.0848374326
Founder	400	288	40.333333333333336	811010.474007804	329219.13645583997	642884.9851894598
Founder	400	288	40.666666666666664	827975.7636200042	337681.1642734012	656101.3407633463
Founder	400	288	41	843624.3366910289	345039.61587704293	668287.8422851583
Founder	400	288	41.333333333333336	860098.8732037258	353155.7765328212	681113.4032448594
Founder	400	288	41.666666666666664	875920.8082595333	360729.3388384321	693426.9594267888
Founder	400	288	42	893470.1020885482	369819.2921376003	707080.4084299663
Founder	400	288	42.333333333333336	910510.343054903	378443.0652326422	720333.4294002295
Founder	400	288	42.666666666666664	928500.0901360838	387937.9523501724	734320.3338245668
Founder	400	288	43	944079.4797136578	395000.63698399335	746429.460310514
Founder	400	288	43.333333333333336	962350.0751419248	404086.98580579384	760625.9921403633
Founder	400	288	43.666666666666664	979696.2902708264	412210.45041315316	774100.0067590377
Founder	400	288	44	998057.0824791908	421054.26786710054	788357.6783719436
Founder	400	288	44.333333333333336	1014453.8580005543	428052.73189618194	801086.4481371127
Founder	400	288	44.666666666666664	1033955.1058258644	438049.89300216973	816220.6425129568
Founder	400	288	45	1052251.8297744193	447324.27810636733	830415.6178223612
Founder	400	288	45.333333333333336	1070398.6586260498	456694.25190537976	844490.1388983752
Founder	400	288	45.666666666666664	1088368.5132147116	466275.44160120556	858423.3857308911
Founder	400	288	46	1106917.0409133965	476662.0275574565	872801.1984656292
Founder	400	288	46.333333333333336	1124649.1185884585	486705.7818930052	886542.2967548087
Founder	400	288	46.666666666666664	1140487.1496832725	495089.492218842	898812.5146275335
Founder	400	288	47	1157713.7217873766	504745.8258900806	912155.177041647
Founder	400	288	47.333333333333336	1174934.5941974109	514288.0317003656	925490.0369043034
Founder	400	288	47.666666666666664	1192247.156904622	523813.5816416583	938892.5330329868
Founder	400	288	48	1209913.5906403356	533337.1491671841	952565.5530184959
Founder	400	288	48.333333333333336	1229126.9216569723	544317.7233701943	967431.9338656844
Founder	400	288	48.666666666666664	1247276.0581583262	554528.0227634715	981471.2455346645
Founder	400	288	49	1264727.7845313142	564630.8386785013	994967.7838680332
Founder	400	288	49.333333333333336	1282734.4940659842	575726.3352495123	1008890.1938581067
Founder	400	288	49.666666666666664	1298998.901201104	586028.611301658	1021462.6228195422
Founder	400	288	50	1314076.9080438751	595559.8078936108	1033115.5598810099
Founder	400	288	50.333333333333336	1328577.4340579938	604567.4269941107	1044320.0410681572
Founder	400	288	50.666666666666664	1344468.3109520264	614420.9075764428	1056596.4422596036
Founder	400	288	51	1360273.7927944537	623866.2793374162	1068804.4145876435
Founder	400	288	51.333333333333336	1377314.312466787	633826.6913356169	1081963.6037079676
Founder	400	288	51.666666666666664	1395250.9646605789	644455.2816319091	1095811.8105454873
Founder	400	288	52	1412347.575471139	654334.5096908781	1109008.6235666801
Founder	400	288	52.333333333333336	1429324.8301515635	664578.0022096059	1122110.6070314741
Founder	400	288	52.666666666666664	1445172.9260162844	673988.6474420134	1134338.777928788
Founder	400	288	53	1460966.888228559	683732.609122489	1146522.9022807584
Founder	400	288	53.333333333333336	1477086.3347338103	694055.003462052	1158955.8001925542
Founder	400	288	53.666666666666664	1494601.3552949547	705784.3343830528	1172462.4765047769
Founder	400	288	54	1510884.8735123544	715881.7709759264	1185017.0572992726
Founder	400	288	54.333333333333336	1527178.6365025572	725933.0312519771	1197577.2245165373
Founder	400	288	54.666666666666664	1543836.3103066222	735920.6944139726	1210415.550111504
Founder	400	288	55	1559563.2693281728	744685.7240958345	1222534.388551216
Founder	400	288	55.333333333333336	1576601.5743932093	754346.3264593638	1235661.3665006943
Founder	400	288	55.666666666666664	1593337.0941467285	763461.2830895787	1248552.708755528
Founder	400	288	56	1611000.622257032	773178.7953423322	1262156.387142643
Founder	400	288	56.333333333333336	1628944.4574054766	783092.8974278838	1275973.3384410744
Founder	400	288	56.666666666666664	1647031.9834500283	793145.6661762552	1289898.303524327
Founder	400	288	57	1663264.2808649924	801603.3290488914	1302392.7680488327
Founder	400	288	57.333333333333336	1681104.943575721	811895.9377609169	1316122.8367117804
Founder	400	288	57.666666666666664	1698504.9267704848	821921.7177575376	1329511.3644924203
Founder	400	288	58	1715339.3435634635	831719.7359514461	1342462.4845950946
Founder	400	288	58.333333333333336	1733307.7520626674	842406.9139190224	1356283.6179637082
Founder	400	288	58.666666666666664	1751068.2177104105	852785.9675228009	1369942.3996147737
Founder	400	288	59	1765978.0482390597	860190.7651836069	1381407.057713749
Founder	400	288	59.333333333333336	1784264.1715419344	871112.9641874077	1395465.6032916158
Founder	400	288	59.666666666666664	1799957.329143336	879613.5980311283	1407528.6897896254
Founder	400	288	60	1815099.6829853987	888579.656284022	1419166.6795820836
Founder	400	288	60.333333333333336	1831063.751019632	899005.5940040902	1431434.4211886544
Founder	400	288	60.666666666666664	1847448.8900704263	910029.7298754578	1444023.840034401
Founder	400	288	61	1862757.1393322847	920401.8323637939	1455784.1144974541
Founder	400	288	61.333333333333336	1879904.585906724	933280.4060819072	1468955.3589734794
Founder	400	288	61.666666666666664	1895376.5377232875	944582.7356722399	1480837.8666286648
Founder	400	288	62	1911899.2992934398	957216.9771277775	1493525.5712211425
Founder	400	288	62.333333333333336	1927767.1188883244	970574.5711943598	1505708.5883605813
Founder	400	288	62.666666666666664	1940588.2034661355	980673.2339145276	1515551.1276976273
Founder	400	288	63	1954739.4790245432	991729.332632156	1526413.5444267644
Founder	400	288	63.333333333333336	1969678.0723437818	1003640.0923625411	1537878.8440164058
Founder	400	288	63.666666666666664	1982440.4946960045	1013356.1819120881	1547672.7662775847
Founder	400	288	64	1997641.541469937	1024553.4225768561	1559336.6923241315
Founder	400	288	64.33333333333333	2012994.1567627694	1036711.3414380824	1571115.3804348786
Founder	400	288	64.66666666666667	2025709.734901312	1046938.7858926301	1580869.7441397335
Founder	400	288	65	2038732.829652237	1056799.6354591763	1590858.926156507
Founder	400	288	65.33333333333333	2052639.1974371371	1068148.78989308	1601524.4077350732
Founder	400	288	65.66666666666667	2066412.5296919306	1079720.6761307118	1612086.6417137936
Founder	400	288	66	2079869.0328051907	1091327.0556721725	1622404.7508221432
Founder	400	288	66.33333333333333	2092782.8290378824	1101609.3882243047	1632305.6540548184
Founder	400	288	66.66666666666667	2108499.5984237473	1115562.4151245493	1644354.1674967636
Founder	400	288	67	2123616.303019521	1128727.559654917	1655941.223012616
Founder	400	288	67.33333333333333	2138214.057052471	1141667.4465021938	1667129.1627738227
Founder	400	288	67.66666666666667	2151317.949976777	1152885.6642607853	1677171.0737548692
Founder	400	288	68	2162723.724153437	1163532.3442591538	1685910.8144587425
Founder	400	288	68.33333333333333	2165039.435477381	1165766.775374464	1687685.145465374
sod1∆	0	192	0	22880.238694114596	8521.873597695738	47881.000000000015
sod1∆	0	192	0.3333333333333333	22894.606286773436	8511.022435368941	47913.27936208367
sod1∆	0	192	0.6666666666666666	22946.490337166404	8493.327946177784	48029.85854595624
sod1∆	0	192	1	23088.74013588812	8490.816224356899	48349.581467716984
sod1∆	0	192	1.3333333333333333	23348.8643159093	8511.79414927407	48934.615009221416
sod1∆	0	192	1.6666666666666667	23787.398130860634	8589.495091153656	49921.98505742195
sod1∆	0	192	2	24443.7853394069	8771.68173405481	51402.35455793357
sod1∆	0	192	2.3333333333333335	25369.770277001866	9059.810896987017	53495.71735317061
sod1∆	0	192	2.6666666666666665	26570.526302503535	9495.142227555507	56218.60754943492
sod1∆	0	192	3	28071.318936627995	10088.15543566027	59634.58442668284
sod1∆	0	192	3.3333333333333335	29938.301264860205	10842.642718167712	63902.77567408343
sod1∆	0	192	3.6666666666666665	32125.975980034877	11735.38314748022	68929.02357268883
sod1∆	0	192	4	34664.63061933789	12805.608461016405	74793.22071367892
sod1∆	0	192	4.333333333333333	37563.97657245139	14028.782319759895	81529.264546629
sod1∆	0	192	4.666666666666667	40886.93129906461	15419.485689623902	89296.53689314458
sod1∆	0	192	5	44617.39664529087	16987.56328043327	98071.73994103038
sod1∆	0	192	5.333333333333333	48800.132857899735	18718.654980230436	107975.08680295268
sod1∆	0	192	5.666666666666667	53440.04664922671	20623.27109542928	119034.04954823507
sod1∆	0	192	6	58606.391340261674	22720.68875815096	131430.96612137425
sod1∆	0	192	6.333333333333333	64254.79510943028	24996.225113468354	145076.79469277893
sod1∆	0	192	6.666666666666667	70421.00317682854	27439.96619440412	160074.53472346804
sod1∆	0	192	7	77127.5617553868	30080.48713661206	176496.45822927277
sod1∆	0	192	7.333333333333333	84403.78238930575	32882.29972021647	194432.35288078387
sod1∆	0	192	7.666666666666667	92257.62452745419	35936.29058959879	213920.0342090759
sod1∆	0	192	8	100781.79264471548	39250.376681528665	235209.3987955692
sod1∆	0	192	8.333333333333334	109960.5911632026	42811.86225934497	258282.18499209906
sod1∆	0	192	8.666666666666666	119953.80614079848	46724.627916963706	283563.5938312684
sod1∆	0	192	9	130681.35997694853	50929.87841782772	310875.62051217083
sod1∆	0	192	9.333333333333334	142363.78067109187	55544.60333974875	340806.68252893956
sod1∆	0	192	9.666666666666666	154863.0620071401	60464.41487630487	373031.1508094999
sod1∆	0	192	10	168314.84607612196	65748.82073428738	407925.50202646037
sod1∆	0	192	10.333333333333334	182657.81859791145	71291.64276169555	445358.15951879555
sod1∆	0	192	10.666666666666666	198031.02393901208	77138.53914107458	485720.16350257315
sod1∆	0	192	11	214434.30295065133	83200.3068018995	529041.3690667342
sod1∆	0	192	11.333333333333334	232120.38356106417	89557.64002512438	576024.1337203865
sod1∆	0	192	11.666666666666666	250699.2920240065	96013.40754133661	625663.0397020101
sod1∆	0	192	12	270723.4391227807	102731.17299158443	679466.9070515103
sod1∆	0	192	12.333333333333334	291877.8446158436	109596.46760257163	736626.4859270575
sod1∆	0	192	12.666666666666666	313736.86441519647	116427.82028088089	796010.9967169997
sod1∆	0	192	13	336601.49312284094	123335.24338473339	858453.9295999497
sod1∆	0	192	13.333333333333334	360851.56188686896	130371.00121461692	925022.1309965412
sod1∆	0	192	13.666666666666666	385932.29247613746	137449.3387605547	994217.6273272735
sod1∆	0	192	14	412282.51482200506	144751.50087163897	1067272.6313085726
sod1∆	0	192	14.333333333333334	440543.2519911331	152208.67686029777	1146006.8314333512
sod1∆	0	192	14.666666666666666	469846.5127917887	159847.6069812612	1228038.7758555484
sod1∆	0	192	15	499829.2432111203	167672.61393242152	1312363.3668889306
sod1∆	0	192	15.333333333333334	531324.5384313315	175578.1840021485	1401343.451121284
sod1∆	0	192	15.666666666666666	563622.1547606295	183500.1424317173	1492994.1349202723
sod1∆	0	192	16	595868.7706177304	191697.41868720012	1584886.5650742503
sod1∆	0	192	16.333333333333332	629142.7051665835	199974.03076579145	1680090.7685505785
sod1∆	0	192	16.666666666666668	663585.3681180208	208311.1601218223	1779029.836497318
sod1∆	0	192	17	698417.9757834253	216795.04988079818	1879474.100945875
sod1∆	0	192	17.333333333333332	733062.0450256724	225660.6775367987	1979741.0758185615
sod1∆	0	192	17.666666666666668	771887.2271750753	233984.3521282741	2092523.4331197399
sod1∆	0	192	18	813897.3716580987	245031.99956853586	2215028.266811186
sod1∆	0	192	18.333333333333332	859127.6207742192	256944.30499265215	2347443.781329915
sod1∆	0	192	18.666666666666668	905694.5190670072	267327.27953779185	2484309.2750612465
sod1∆	0	192	19	952859.7555087073	276618.7576852861	2623462.170451875
sod1∆	0	192	19.333333333333332	996746.3400889293	286128.98042188433	2753398.5471366933
sod1∆	0	192	19.666666666666668	1038622.3363925308	292772.99184021784	2877775.5007207873
sod1∆	0	192	20	1078168.3431126508	298990.74183364783	2995571.6049883673
sod1∆	0	192	20.333333333333332	1117940.417813152	307170.15604284167	3114362.1589536387
sod1∆	0	192	20.666666666666668	1159785.7624848962	315554.5155317905	3239681.0645330353
sod1∆	0	192	21	1203517.757233516	323867.4038382699	3371005.96084798
sod1∆	0	192	21.333333333333332	1247366.0799334089	332249.92489385733	3503033.1676278794
sod1∆	0	192	21.666666666666668	1290745.9824487916	341425.09393161774	3633986.4733667653
sod1∆	0	192	22	1335171.6111428197	350269.35987723793	3768432.5333347283
sod1∆	0	192	22.333333333333332	1379400.1180178504	359219.30342000653	3902609.4161529024
sod1∆	0	192	22.666666666666668	1420824.1829617785	369563.739168636	4028565.996967461
sod1∆	0	192	23	1462343.2597539346	379854.83053994004	4155082.8781143427
sod1∆	0	192	23.333333333333332	1506574.1009394135	388270.3856296034	4290153.925141357
sod1∆	0	192	23.666666666666668	1547921.8617037828	398561.28254747007	4416684.985859665
sod1∆	0	192	24	1588314.9895186217	409899.69808040664	4540535.113792792
sod1∆	0	192	24.333333333333332	1630592.0548960236	420050.4109686514	4670409.954422297
sod1∆	0	192	24.666666666666668	1672501.2432323701	430204.25094694324	4799399.4482945325
sod1∆	0	192	25	1711177.2042044892	442763.2277156035	4918648.915039621
sod1∆	0	192	25.333333333333332	1753531.8297959233	452639.64895931946	5049468.317750102
sod1∆	0	192	25.666666666666668	1793494.74041982	463541.9820229443	5173113.935029743
sod1∆	0	192	26	1832877.7732203538	474857.4090261019	5295163.8904176755
sod1∆	0	192	26.333333333333332	1870565.8820755389	487033.7010650249	5412142.047606523
sod1∆	0	192	26.666666666666668	1908289.8255987717	497668.87265508744	5529405.199336236
sod1∆	0	192	27	1941142.533937751	509465.69526042737	5631665.4803322125
sod1∆	0	192	27.333333333333332	1977605.6279160995	518679.60333639884	5745312.860370646
sod1∆	0	192	27.666666666666668	2011486.8785974758	529147.0409910398	5851051.527759778
sod1∆	0	192	28	2046633.320720005	537616.1295817291	5960877.199772907
sod1∆	0	192	28.333333333333332	2080540.9736591512	546721.0685285938	6066963.509683126
sod1∆	0	192	28.666666666666668	2112383.32958461	556005.6031598233	6166704.073521243
sod1∆	0	192	29	2141552.1817785273	565691.3499828948	6258167.5185492635
sod1∆	0	192	29.333333333333332	2169568.1765964935	574527.4189379344	6346102.344368039
sod1∆	0	192	29.666666666666668	2194037.6702514077	585015.6855512802	6422974.047806179
sod1∆	0	192	30	2219155.940147326	593809.6339305318	6501949.524643807
sod1∆	0	192	30.333333333333332	2245540.3478234652	601603.09848539	6584976.756541896
sod1∆	0	192	30.666666666666668	2268800.632522242	609770.4394301584	6658232.48100723
sod1∆	0	192	31	2293054.4083101233	616771.295838957	6734675.952190442
sod1∆	0	192	31.333333333333332	2316386.297614523	623352.6314308245	6808269.96761938
sod1∆	0	192	31.666666666666668	2339046.081826342	629395.3719038813	6879796.235897421
sod1∆	0	192	32	2359765.3690226134	636097.7673662315	6945241.910294572
sod1∆	0	192	32.333333333333336	2379639.504585489	642534.3096524962	7008057.756797375
sod1∆	0	192	32.666666666666664	2397834.8304388337	648827.7816916194	7065601.277004493
sod1∆	0	192	33	2417015.7788093854	654736.4797803197	7126296.656999383
sod1∆	0	192	33.333333333333336	2434492.3162745037	661629.2959921687	7181629.538010846
sod1∆	0	192	33.666666666666664	2453058.0800324744	667662.9564476149	7240443.058533359
sod1∆	0	192	34	2471624.5137776295	673346.9946295161	7299291.4581891345
sod1∆	0	192	34.333333333333336	2489055.5836285832	679862.7093323247	7354570.804770473
sod1∆	0	192	34.666666666666664	2504512.7525932584	687268.4356838536	7403614.133558655
sod1∆	0	192	35	2519954.1223112782	695234.9870028283	7452629.571485921
sod1∆	0	192	35.333333333333336	2535196.4324388374	703453.4572285793	7501034.811091699
sod1∆	0	192	35.666666666666664	2551597.674844913	711377.7261401783	7553144.4047628455
sod1∆	0	192	36	2568493.336741701	718625.979376203	7606850.625729399
sod1∆	0	192	36.333333333333336	2585754.8898690925	724322.8003606761	7661746.74964973
sod1∆	0	192	36.666666666666664	2602582.3401959124	729533.3852865379	7715288.274858565
sod1∆	0	192	37	2618561.7188130943	734583.3279829088	7766154.990392703
sod1∆	0	192	37.333333333333336	2633023.1795096714	739278.3398061617	7812209.451981097
sod1∆	0	192	37.666666666666664	2646994.8054320267	743775.9460268372	7856721.6469074385
sod1∆	0	192	38	2660174.4940906055	748891.8560701843	7898726.656146473
sod1∆	0	192	38.333333333333336	2672752.693501799	754201.1871107232	7938828.939157113
sod1∆	0	192	38.666666666666664	2686232.781768202	759983.9947502925	7981822.07126807
sod1∆	0	192	39	2699668.2890310595	766063.6621648369	8024688.813503519
sod1∆	0	192	39.333333333333336	2713335.012535069	772258.7248533393	8068309.368219409
sod1∆	0	192	39.666666666666664	2727712.4526110203	778108.8731956697	8114215.789180429
sod1∆	0	192	40	2741697.4323523752	783976.4829612655	8158886.186827194
sod1∆	0	192	40.333333333333336	2755526.5636214456	789594.223612611	8203075.264545933
sod1∆	0	192	40.666666666666664	2769624.5211510467	795574.6547054276	8248140.135432071
sod1∆	0	192	41	2783216.7386442097	801500.3753573801	8291604.36315292
sod1∆	0	192	41.333333333333336	2796390.2383026243	808063.5887643766	8333744.549114155
sod1∆	0	192	41.666666666666664	2809066.1934538237	814352.479116043	8374306.9498526715
sod1∆	0	192	42	2820936.157873942	820638.8892985163	8412302.433233622
sod1∆	0	192	42.333333333333336	2833321.127429692	826971.4227496769	8451958.975373061
sod1∆	0	192	42.666666666666664	2845861.2521442263	833465.9552203132	8492125.317402257
sod1∆	0	192	43	2858615.007723075	840056.2529309179	8532989.281364916
sod1∆	0	192	43.333333333333336	2871753.919447435	846707.5243142297	8575101.341142045
sod1∆	0	192	43.666666666666664	2884439.8259260254	852901.3410612998	8615774.907626156
sod1∆	0	192	44	2896878.880911279	858890.5345383333	8655669.799011137
sod1∆	0	192	44.333333333333336	2909613.899303967	864454.8353975343	8696526.969822697
sod1∆	0	192	44.666666666666664	2922377.2127012527	869621.4086601491	8737488.119538847
sod1∆	0	192	45	2935120.6359084784	874512.0391778674	8778398.567735167
sod1∆	0	192	45.333333333333336	2947872.5740409237	879152.4603520228	8819349.433418466
sod1∆	0	192	45.666666666666664	2960108.267553263	883877.5975326916	8858654.71346055
sod1∆	0	192	46	2971438.0596049353	889184.5126896633	8895060.584742563
sod1∆	0	192	46.333333333333336	2982389.673702566	894816.4952910446	8930260.969628977
sod1∆	0	192	46.666666666666664	2992794.2848923574	900602.0256770168	8963712.002477981
sod1∆	0	192	47	3003429.0438375482	907081.4107905126	8997911.807011297
sod1∆	0	192	47.333333333333336	3013932.2978672916	913630.4015023714	9031697.456477022
sod1∆	0	192	47.666666666666664	3024975.6513820365	919454.8687202628	9067229.77705502
sod1∆	0	192	48	3035513.5011282563	924970.3589496566	9101144.523299
sod1∆	0	192	48.333333333333336	3045904.6383530046	930247.6268769727	9134595.576104993
sod1∆	0	192	48.666666666666664	3055191.8760589035	935020.4674218021	9164500.072197609
sod1∆	0	192	49	3064018.667333986	939384.6117095993	9192928.150317969
sod1∆	0	192	49.333333333333336	3071844.2266864516	944268.0474744048	9218136.641937
sod1∆	0	192	49.666666666666664	3080339.1056553805	949384.2413315852	9245506.562088601
sod1∆	0	192	50	3089420.2093773354	954361.3264579999	9274771.399318608
sod1∆	0	192	50.333333333333336	3098946.4169973596	959182.7044866711	9305477.433379447
sod1∆	0	192	50.666666666666664	3108900.205508746	964128.9965224793	9337569.11718412
sod1∆	0	192	51	3119448.7683003363	968598.7230287964	9371586.643403113
sod1∆	0	192	51.333333333333336	3129756.722996842	973122.5945113342	9404836.420942295
sod1∆	0	192	51.666666666666664	3139719.8887389023	978070.9792777463	9436981.690080345
sod1∆	0	192	52	3149665.724813838	983280.6967816573	9469078.531927126
sod1∆	0	192	52.333333333333336	3159360.766645306	988590.4768191972	9500373.197103875
sod1∆	0	192	52.666666666666664	3168971.819920799	994104.9280349069	9531403.729244264
sod1∆	0	192	53	3178054.0557932374	999675.0748920158	9560733.269212196
sod1∆	0	192	53.333333333333336	3187322.528630793	1005667.1597821125	9590670.587423408
sod1∆	0	192	53.666666666666664	3196491.7827827316	1011964.8037132034	9620293.73013902
sod1∆	0	192	54	3205565.4844158604	1018423.9225440333	9649614.325494306
sod1∆	0	192	54.333333333333336	3214263.826999487	1025035.0036072255	9677727.725100158
sod1∆	0	192	54.666666666666664	3223542.8157519437	1031883.1121543876	9707723.966847776
sod1∆	0	192	55	3232456.005782077	1038658.2355964031	9736543.670985034
sod1∆	0	192	55.333333333333336	3241623.854799577	1045716.7236499335	9766192.883067243
sod1∆	0	192	55.666666666666664	3250736.2140244297	1053336.9256484455	9795668.75221068
sod1∆	0	192	56	3260040.4219106664	1061185.562573232	9825771.46895406
sod1∆	0	192	56.333333333333336	3269039.4085096354	1068610.6134701378	9854892.690028355
sod1∆	0	192	56.666666666666664	3278567.5946306107	1076274.8417522265	9885732.858214276
sod1∆	0	192	57	3288173.98935795	1083850.194631126	9916832.842085984
sod1∆	0	192	57.333333333333336	3297873.3175463555	1091303.5722182067	9948240.47305324
sod1∆	0	192	57.666666666666664	3308137.565845003	1099411.8172939061	9981484.78658071
sod1∆	0	192	58	3318557.3088736017	1107759.9783023852	10015240.485646535
sod1∆	0	192	58.333333333333336	3328827.710866307	1116219.9440565447	10048520.012054928
sod1∆	0	192	58.666666666666664	3338562.702987152	1124741.2891858895	10080071.606151206
sod1∆	0	192	59	3348296.17703565	1133329.9809070125	10111625.0473589
sod1∆	0	192	59.333333333333336	3357594.1962341955	1141699.9678737659	10141773.15760783
sod1∆	0	192	59.666666666666664	3366761.76115344	1150713.6236282776	10171504.293706356
sod1∆	0	192	60	3375416.619878521	1159757.873462752	10199578.149260392
sod1∆	0	192	60.333333333333336	3383914.59871725	1168510.5290195686	10227148.284814598
sod1∆	0	192	60.666666666666664	3391564.560205701	1177142.0493601137	10251971.540494984
sod1∆	0	192	61	3398864.4955568556	1185695.235554551	10275662.842157824
sod1∆	0	192	61.333333333333336	3405625.625061069	1193624.051567477	10297608.835979225
sod1∆	0	192	61.666666666666664	3412380.2679888844	1201344.4566552485	10319536.97575018
sod1∆	0	192	62	3418990.0774782975	1209986.0949946682	10340998.022529555
sod1∆	0	192	62.333333333333336	3425585.313739906	1219032.4082415372	10362414.794580469
sod1∆	0	192	62.666666666666664	3432031.805665663	1228326.5944468519	10383351.479497075
sod1∆	0	192	63	3439208.368360345	1237684.863286677	10406662.665062143
sod1∆	0	192	63.333333333333336	3448729.6429222254	1246545.699478714	10437595.555824557
sod1∆	0	192	63.666666666666664	3458709.097428271	1254436.6447473054	10470023.733542114
sod1∆	0	192	64	3469260.289827118	1261793.5268324355	10504317.256473836
sod1∆	0	192	64.33333333333333	3478996.7256181254	1269259.3888394614	10535969.462683594
sod1∆	0	192	64.66666666666667	3487983.6604898805	1276160.069743217	10565190.898685046
sod1∆	0	192	65	3494815.8419444803	1284403.5106935168	10587409.760894097
sod1∆	0	192	65.33333333333333	3502313.694944734	1292317.0962621826	10611797.123850081
sod1∆	0	192	65.66666666666667	3510777.2755052014	1299911.5302812154	10639330.207093937
sod1∆	0	192	66	3523776.590121328	1304678.5426470686	10681628.105281834
sod1∆	0	192	66.33333333333333	3537502.9543613093	1310079.7695232027	10726304.179079924
sod1∆	0	192	66.66666666666667	3551846.052104826	1314722.6405883892	10773001.201116242
sod1∆	0	192	67	3560032.1366152554	1321401.34442161	10799658.97217496
sod1∆	5	192	0	29519.89492117948	34026.75845361275	47881.000000000015
sod1∆	5	192	0.3333333333333333	29530.96820881739	33955.783880780604	47899.80490459113
sod1∆	5	192	0.6666666666666666	30223.862192595672	34569.88203934335	49077.14721555418
sod1∆	5	192	1	30575.188770676934	34766.469202229055	49674.596208376046
sod1∆	5	192	1.3333333333333333	31483.31747455985	35432.39811636287	51220.40247439662
sod1∆	5	192	1.6666666666666667	32077.338805675736	35883.27744912024	52232.67673604475
sod1∆	5	192	2	32884.06784712659	36545.41085614146	53608.835309694805
sod1∆	5	192	2.3333333333333335	33223.29050199604	36541.566112055014	54187.97443821323
sod1∆	5	192	2.6666666666666665	34304.91094571245	37358.70461278674	56036.41787814908
sod1∆	5	192	3	35035.29999005665	37871.2722885993	57286.17718386232
sod1∆	5	192	3.3333333333333335	36508.08674613092	39016.4883744344	59809.94446623639
sod1∆	5	192	3.6666666666666665	38256.66516854286	40218.65682634124	62812.51306221963
sod1∆	5	192	4	40008.78672380112	41757.766513911774	65827.64301927367
sod1∆	5	192	4.333333333333333	41944.63078637782	43261.87056850402	69166.14499267419
sod1∆	5	192	4.666666666666667	44110.85789082272	45082.69939150954	72910.54057717358
sod1∆	5	192	5	46155.16545680337	46912.98015168268	76452.13803968165
sod1∆	5	192	5.333333333333333	47974.55079302237	48899.30492828181	79610.29293706866
sod1∆	5	192	5.666666666666667	50419.2987405437	51099.63814548566	83862.81103879749
sod1∆	5	192	6	52805.304841564226	53441.97802195107	88022.51093038746
sod1∆	5	192	6.333333333333333	55148.11729594687	55828.91676116204	92115.51591768302
sod1∆	5	192	6.666666666666667	57698.12736274215	58538.71037512759	96579.79253299959
sod1∆	5	192	7	60599.6321375401	61395.65028053725	101670.69741833347
sod1∆	5	192	7.333333333333333	63192.661635515455	64181.601404563415	106230.08145857808
sod1∆	5	192	7.666666666666667	66033.91242766881	67590.2627689989	111236.0127299379
sod1∆	5	192	8	69309.1898639964	71076.5893243686	117019.1942710004
sod1∆	5	192	8.333333333333334	73029.69494118258	74813.35984956635	123604.08839571405
sod1∆	5	192	8.666666666666666	76850.23102823916	78996.95380089493	130382.45119251782
sod1∆	5	192	9	81034.64840838322	83437.4928942509	137824.57952815582
sod1∆	5	192	9.333333333333334	85278.27251912352	88073.14587907848	145390.47803586314
sod1∆	5	192	9.666666666666666	89665.45231722624	93044.11119056898	153230.93867504664
sod1∆	5	192	10	94339.00137738875	97876.997767867535	161603.01881495636
sod1∆	5	192	10.333333333333334	99320.60977340915	103435.32173379824	170548.418959314
sod1∆	5	192	10.666666666666666	104637.68937693132	108991.30870712799	180119.4927478944
sod1∆	5	192	11	110591.74954710463	114224.88151402377	190864.2876907087
sod1∆	5	192	11.333333333333334	116709.64302309611	120103.02446305579	201933.08988731715
sod1∆	5	192	11.666666666666666	124127.61178785384	127928.06462266207	215390.5604508375
sod1∆	5	192	12	131766.63388402003	134948.37132451448	229288.6128972742
sod1∆	5	192	12.333333333333334	140488.25824888263	143093.40091302874	245202.55779661643
sod1∆	5	192	12.666666666666666	149432.49131183221	152439.1548542159	261570.97942429085
sod1∆	5	192	13	160579.9760076583	161252.1731574256	282035.7491218835
sod1∆	5	192	13.333333333333334	170019.9256508071	168305.66736267653	299418.292325029
sod1∆	5	192	13.666666666666666	180716.49485248295	177525.60960512888	319169.5327607412
sod1∆	5	192	14	190731.14268550507	185801.20180387772	337711.55236899544
sod1∆	5	192	14.333333333333334	201147.22323184807	194023.01692260956	357045.4061078265
sod1∆	5	192	14.666666666666666	209318.2039302493	201816.5795737705	372245.10438312724
sod1∆	5	192	15	219725.05941040537	211305.35469968044	391644.2691958129
sod1∆	5	192	15.333333333333334	232805.77891070323	220622.15679010344	416088.81715756387
sod1∆	5	192	15.666666666666666	246793.63047918314	229655.58508023454	442300.0175186706
sod1∆	5	192	16	261618.93613596892	239625.43818377735	470156.74880031805
sod1∆	5	192	16.333333333333332	277328.2444899979	249851.55207185022	499755.528461515
sod1∆	5	192	16.666666666666668	292655.2010790083	258117.7796164459	528710.0022874258
sod1∆	5	192	17	305572.20851446374	266582.2043540281	553167.3558858784
sod1∆	5	192	17.333333333333332	322334.0567171682	275202.2830361206	584976.8510164076
sod1∆	5	192	17.666666666666668	340307.4563297537	282704.0055693971	619171.9466145493
sod1∆	5	192	18	359496.1206654479	291748.78335992876	655772.8512469281
sod1∆	5	192	18.333333333333332	381849.6636800742	300212.4388183323	698526.1635913847
sod1∆	5	192	18.666666666666668	405665.7413287408	311356.77696050756	744206.2104585104
sod1∆	5	192	19	425439.77141008223	322308.84133137454	782229.7061999994
sod1∆	5	192	19.333333333333332	445402.73133346206	331332.7166190602	820700.8436454617
sod1∆	5	192	19.666666666666668	467768.21142835426	341658.91965716885	863898.1478935828
sod1∆	5	192	20	487643.71696686454	353884.3517993024	902367.9500127498
sod1∆	5	192	20.333333333333332	506756.39032301557	361393.1071717722	939430.8708964206
sod1∆	5	192	20.666666666666668	528314.3313212435	368412.7095188281	981314.4039130696
sod1∆	5	192	21	549433.023183699	379139.427429858	1022422.5344193043
sod1∆	5	192	21.333333333333332	574292.0614599176	388477.1376505604	1070906.3990281203
sod1∆	5	192	21.666666666666668	598242.1692936334	397301.48603396467	1117710.972955368
sod1∆	5	192	22	620993.9569826875	406334.1970136972	1162255.4251624728
sod1∆	5	192	22.333333333333332	643712.4655712998	415431.51961005625	1206811.3249777143
sod1∆	5	192	22.666666666666668	664860.8108262827	423318.05833997356	1248354.3223150657
sod1∆	5	192	23	686402.5986904657	431878.0946773476	1290734.0663781844
sod1∆	5	192	23.333333333333332	714076.6173007251	440551.9168173842	1345269.4573234743
sod1∆	5	192	23.666666666666668	737984.0085082464	449694.99102242466	1392462.3819402906
sod1∆	5	192	24	762280.1859863136	459703.3641319904	1440496.4241642577
sod1∆	5	192	24.333333333333332	787296.825736767	468299.8223212141	1490030.0536341968
sod1∆	5	192	24.666666666666668	805413.1203166815	473495.1014173314	1525947.1530194315
sod1∆	5	192	25	818641.9527407648	478981.1861118979	1552198.4837625744
sod1∆	5	192	25.333333333333332	844478.0274838305	489708.55648368964	1603524.8877740689
sod1∆	5	192	25.666666666666668	870468.8988983984	501043.2472471643	1655233.3256689203
sod1∆	5	192	26	900801.2947873947	513509.4000499164	1715670.8329151513
sod1∆	5	192	26.333333333333332	931213.6515881129	525806.808426652	1776363.7603517016
sod1∆	5	192	26.666666666666668	965798.7745274634	541791.3549327037	1845497.2729825482
sod1∆	5	192	27	995448.6498834181	554104.9352659839	1904858.3921516414
sod1∆	5	192	27.333333333333332	1024922.9334592801	566062.0205955507	1963950.3838323313
sod1∆	5	192	27.666666666666668	1048909.9716592922	576611.1187184084	2012100.2663826153
sod1∆	5	192	28	1072760.426073848	588765.6901051091	2060027.3142141602
sod1∆	5	192	28.333333333333332	1100481.4408202951	598638.3897489036	2115795.065634055
sod1∆	5	192	28.666666666666668	1127085.4442570324	611216.9778258306	2169377.8063983847
sod1∆	5	192	29	1151675.747282272	621866.6444969173	2218957.6998830824
sod1∆	5	192	29.333333333333332	1179599.7899790555	634312.710707828	2275319.5013519307
sod1∆	5	192	29.666666666666668	1212345.7560708462	649149.1804686364	2341493.6757288543
sod1∆	5	192	30	1240657.4360603716	663040.3621757494	2398774.7198807783
sod1∆	5	192	30.333333333333332	1268963.6976575048	675666.0530810625	2456106.2441788237
sod1∆	5	192	30.666666666666668	1299150.2693862312	691531.5457054472	2517312.373199455
sod1∆	5	192	31	1325034.7573510685	702898.8682474308	2569848.92925843
sod1∆	5	192	31.333333333333332	1344817.638602651	710482.6767625217	2610033.911976139
sod1∆	5	192	31.666666666666668	1359980.7451920991	714441.3033043324	2640853.5749883335
sod1∆	5	192	32	1386478.137722154	725422.6853342303	2694749.3303693705
sod1∆	5	192	32.333333333333336	1409983.3889152738	735158.9953035252	2742599.622218897
sod1∆	5	192	32.666666666666664	1434219.1640254986	746870.2370108598	2791976.321296183
sod1∆	5	192	33	1457906.4837688475	757198.999094799	2840273.5337107563
sod1∆	5	192	33.333333333333336	1482257.7177996319	769688.4151526375	2889962.8813842773
sod1∆	5	192	33.666666666666664	1507994.5297019936	782910.0219340295	2942521.238041493
sod1∆	5	192	34	1537665.3657216912	798652.0934979998	3003165.7379966173
sod1∆	5	192	34.333333333333336	1571807.0241846924	818336.1178841044	3073016.206100834
sod1∆	5	192	34.666666666666664	1604939.679909871	839829.0226987012	3140870.572906358
sod1∆	5	192	35	1636677.714963665	861188.2061157947	3205930.5880715866
sod1∆	5	192	35.333333333333336	1657333.737390578	872424.4802151398	3248305.4414688093
sod1∆	5	192	35.666666666666664	1688317.8108905372	891849.7865679851	3311914.2584065227
sod1∆	5	192	36	1704005.3944650127	898875.4656200706	3344141.1025105813
sod1∆	5	192	36.333333333333336	1719454.3922598844	903731.0916495591	3375891.45088311
sod1∆	5	192	36.666666666666664	1742979.5403969523	914540.9783069685	3424265.3928901777
sod1∆	5	192	37	1759825.3866419236	921727.8206195307	3458923.7990166154
sod1∆	5	192	37.333333333333336	1765312.5466653353	920271.4698855648	3470216.378227265
sod1∆	5	192	37.666666666666664	1790052.3125413468	935154.9594543001	3521151.247504772
sod1∆	5	192	38	1816334.687854505	953881.6313393919	3575298.3206344284
sod1∆	5	192	38.333333333333336	1841669.8670353787	971679.4030002108	3627528.844924668
sod1∆	5	192	38.666666666666664	1869750.304538115	991608.72230445	3685458.3856461104
sod1∆	5	192	39	1890640.719161948	1006640.1388960432	3728581.5742947664
sod1∆	5	192	39.333333333333336	1902318.0089390955	1012773.1302533473	3752696.277114481
sod1∆	5	192	39.666666666666664	1916539.8444831076	1019540.8780330821	3782075.098330993
sod1∆	5	192	40	1921952.187881205	1018796.0253078792	3793258.366746971
sod1∆	5	192	40.333333333333336	1944096.5907422479	1033500.5414859387	3839029.668131208
sod1∆	5	192	40.666666666666664	1973363.0859089773	1054291.2434914885	3899559.506873596
sod1∆	5	192	41	2006622.4396337362	1079718.6267093823	3968398.6896481034
sod1∆	5	192	41.333333333333336	2034691.9000392947	1100885.5886401846	4026537.7619541404
sod1∆	5	192	41.666666666666664	2064670.2763078993	1124710.3059878163	4088672.3122952147
sod1∆	5	192	42	2077153.8654340133	1132267.118717037	4114558.9090597793
sod1∆	5	192	42.333333333333336	2091005.9803584192	1140714.738211968	4143291.9056049003
sod1∆	5	192	42.666666666666664	2100004.2899157256	1145231.67780952	4161961.6062740274
sod1∆	5	192	43	2124288.327345848	1165452.6341873389	4212364.868776205
sod1∆	5	192	43.333333333333336	2149865.9375882596	1187704.8282101308	4265482.3140075905
sod1∆	5	192	43.666666666666664	2186431.1229632986	1220465.7933353407	4341469.340118814
sod1∆	5	192	44	2221366.415845793	1252052.7234910901	4414125.063641052
sod1∆	5	192	44.333333333333336	2256498.2565229507	1282749.7872746044	4487243.719369268
sod1∆	5	192	44.666666666666664	2278261.371042718	1299949.512059066	4532565.412286398
sod1∆	5	192	45	2296284.3774700183	1312777.5776695362	4570113.74025588
sod1∆	5	192	45.333333333333336	2305711.545815078	1316537.5490668204	4589759.406195587
sod1∆	5	192	45.666666666666664	2317822.8157383325	1322581.8351756611	4615004.120211951
sod1∆	5	192	46	2332786.939271662	1334032.296299472	4646203.876502211
sod1∆	5	192	46.333333333333336	2356436.268522975	1354420.8502610095	4695531.186822997
sod1∆	5	192	46.666666666666664	2381120.779276124	1376682.0225966687	4747042.473237168
sod1∆	5	192	47	2408526.77715164	1401347.312930171	4804262.312239556
sod1∆	5	192	47.333333333333336	2433331.0855664415	1424201.294474759	4856076.584708434
sod1∆	5	192	47.666666666666664	2453787.3985501947	1441559.1793459102	4898826.922099233
sod1∆	5	192	48	2467218.861557375	1452471.2569702682	4926905.593696575
sod1∆	5	192	48.333333333333336	2482409.2759936014	1464903.2434060012	4958670.033741586
sod1∆	5	192	48.666666666666664	2495026.2947565983	1476289.3009219458	4985060.2329560425
sod1∆	5	192	49	2511356.6849600156	1491501.8510275362	5019226.757761762
sod1∆	5	192	49.333333333333336	2530186.91820156	1510095.0187569188	5058636.423993596
sod1∆	5	192	49.666666666666664	2548496.4492823603	1526864.4159991439	5096969.5349665
sod1∆	5	192	50	2575195.495953976	1552341.005125655	5152890.236482952
sod1∆	5	192	50.333333333333336	2605010.4213452134	1580862.2072866505	5215369.287210351
sod1∆	5	192	50.666666666666664	2634751.1798472083	1609006.5690274644	5277726.402857764
sod1∆	5	192	51	2665726.4061636217	1637618.2076635764	5342706.980945738
sod1∆	5	192	51.333333333333336	2693703.3610801827	1663246.0608495458	5401428.227410198
sod1∆	5	192	51.666666666666664	2715656.7708467823	1682732.097306443	5447526.651892353
sod1∆	5	192	52	2738481.0153651293	1704129.8045538026	5495472.249821797
sod1∆	5	192	52.333333333333336	2766250.4678051374	1730886.2446321356	5553831.277552553
sod1∆	5	192	52.666666666666664	2793095.50731204	1757010.2574932142	5610273.7794466
sod1∆	5	192	53	2819738.006716624	1783645.1269175867	5666315.644484915
sod1∆	5	192	53.333333333333336	2844988.7136454596	1809132.463329778	5719452.882016871
sod1∆	5	192	53.666666666666664	2867543.457799453	1831694.293857677	5766935.520968442
sod1∆	5	192	54	2882954.279900904	1847116.638423778	5799388.753037617
sod1∆	5	192	54.333333333333336	2905500.77968275	1869496.1852938216	5846883.492731355
sod1∆	5	192	54.666666666666664	2932555.8160356274	1896713.7695048833	5903898.424558907
sod1∆	5	192	55	2961100.2930209334	1925062.8391781216	5964078.953820314
sod1∆	5	192	55.333333333333336	2991812.0344549203	1955417.9154787562	6028859.186027455
sod1∆	5	192	55.666666666666664	3024952.833393374	1989287.1402321972	6098798.078038551
sod1∆	5	192	56	3052256.3449960593	2016809.2633970634	6156445.289179172
sod1∆	5	192	56.333333333333336	3078896.7008692757	2043116.7542504075	6212715.710331282
sod1∆	5	192	56.666666666666664	3107798.864672204	2071434.1408734955	6273789.452399743
sod1∆	5	192	57	3135415.5226535294	2098288.403675463	6332171.7102125455
sod1∆	5	192	57.333333333333336	3160925.555062564	2122462.726840378	6386121.9906768985
sod1∆	5	192	57.666666666666664	3186965.228861859	2147921.4558177935	6441213.495301346
sod1∆	5	192	58	3212432.82820218	2172400.8285345724	6495115.1409076555
sod1∆	5	192	58.333333333333336	3234906.116427583	2193970.4494745694	6542696.074573226
sod1∆	5	192	58.666666666666664	3260516.1012331857	2219031.8875490795	6596937.023340722
sod1∆	5	192	59	3285423.1709574135	2242970.5981960776	6649708.433164368
sod1∆	5	192	59.333333333333336	3309641.003812042	2265779.7727731946	6701037.564950738
sod1∆	5	192	59.666666666666664	3334012.4919044054	2289499.18806741	6752710.185663481
sod1∆	5	192	60	3357794.4949225904	2313008.661372179	6803150.089852279
sod1∆	5	192	60.333333333333336	3379524.1627246425	2334513.197072919	6849251.82160482
sod1∆	5	192	60.666666666666664	3402924.539289413	2358296.296840213	6898913.710787864
sod1∆	5	192	61	3427679.7123829746	2384307.4702651883	6951468.310648679
sod1∆	5	192	61.333333333333336	3451771.78298501	2409439.5955615113	7002632.289920985
sod1∆	5	192	61.666666666666664	3476913.1640081163	2435369.91140796	7056042.568183734
sod1∆	5	192	62	3503224.8115002997	2462154.053443951	7111958.393017366
sod1∆	5	192	62.333333333333336	3528087.085626918	2487804.2759557413	7164812.241710798
sod1∆	5	192	62.666666666666664	3549724.1576503003	2509950.9959886963	7210823.994758555
sod1∆	5	192	63	3572616.6134404056	2533171.811865553	7259519.699907363
sod1∆	5	192	63.333333333333336	3596275.119947244	2555279.2753862473	7309860.318118418
sod1∆	5	192	63.666666666666664	3617735.5425994205	2574835.6350515084	7355537.313851199
sod1∆	5	192	64	3642063.552112291	2596355.3627056237	7407333.161985906
sod1∆	5	192	64.33333333333333	3665155.497433742	2616914.279288051	7456512.396018245
sod1∆	5	192	64.66666666666667	3686865.5680600847	2636268.5569379195	7502761.914900456
sod1∆	5	192	65	3706925.79159435	2654977.9238367253	7545508.100859917
sod1∆	5	192	65.33333333333333	3729031.725429671	2675010.817513801	7592626.064639571
sod1∆	5	192	65.66666666666667	3749216.197699767	2691601.628229359	7635659.972485003
sod1∆	5	192	66	3772968.0222878675	2709322.774988599	7686313.524042857
sod1∆	5	192	66.33333333333333	3794327.775831631	2725145.138493329	7731878.504412099
sod1∆	5	192	66.66666666666667	3819451.2909677164	2745207.3015463655	7785487.826487828
sod1∆	5	192	67	3839897.2081690505	2764792.184680817	7829128.183825879
sod1∆	25	192	0	36630.110468702274	22185.7608836507	47881.000000000015
sod1∆	25	192	0.3333333333333333	36539.517107058535	22098.032928504515	47759.56652700127
sod1∆	25	192	0.6666666666666666	36429.96553516347	21953.46377062583	47612.7312751793
sod1∆	25	192	1	36329.89683860057	21774.423022163166	47478.616039408356
sod1∆	25	192	1.3333333333333333	36309.6947523577	21595.82755408227	47451.54170519186
sod1∆	25	192	1.6666666666666667	36369.31247802688	21398.770965674856	47531.441004930646
sod1∆	25	192	2	36605.43655858107	21286.541580655925	47847.92575114042
sod1∆	25	192	2.3333333333333335	36982.53416186758	21221.427721216685	48353.46965443055
sod1∆	25	192	2.6666666666666665	37496.33608485376	21231.005626716335	49042.493101597494
sod1∆	25	192	3	38082.368093816425	21340.73146354937	49828.67286247431
sod1∆	25	192	3.3333333333333335	38719.03419000198	21549.340123257927	50683.12920190378
sod1∆	25	192	3.6666666666666665	39441.32467961697	21909.27949753108	51652.933656765614
sod1∆	25	192	4	40179.56266386186	22315.561052781897	52644.618334104176
sod1∆	25	192	4.333333333333333	40878.042324390946	22756.03870969083	53583.32297145928
sod1∆	25	192	4.666666666666667	41554.100638976146	23233.89309384232	54492.2845110071
sod1∆	25	192	5	42221.367202851725	23765.129543930787	55389.79525230872
sod1∆	25	192	5.333333333333333	42892.9744032035	24192.795239672738	56293.50953785013
sod1∆	25	192	5.666666666666667	43403.47847295422	24672.665888789983	56980.68515674065
sod1∆	25	192	6	43977.29113179916	25101.455432088747	57753.3245830406
sod1∆	25	192	6.333333333333333	44434.34250916628	25568.636119509792	58368.92884611511
sod1∆	25	192	6.666666666666667	44995.35353553749	25998.52845263769	59124.777263523465
sod1∆	25	192	7	45568.21241693058	26508.111298334654	59896.8361512768
sod1∆	25	192	7.333333333333333	46433.23335711206	26932.52897232982	61063.11843827569
sod1∆	25	192	7.666666666666667	47734.16094448186	27282.150494105	62818.160710732154
sod1∆	25	192	8	49340.06067684194	27526.492023945117	64986.31042496205
sod1∆	25	192	8.333333333333334	50834.0201705467	27821.153815410944	67004.94501265956
sod1∆	25	192	8.666666666666666	52216.1098464291	28149.168296457246	68873.76952002964
sod1∆	25	192	9	53494.45613001787	28578.931021719898	70603.43861047349
sod1∆	25	192	9.333333333333334	54282.68508849182	29138.530087936328	71670.48027503937
sod1∆	25	192	9.666666666666666	54995.422314132666	29829.587920250036	72635.66746549797
sod1∆	25	192	10	55861.01870705134	30609.686931614775	73808.28463280048
sod1∆	25	192	10.333333333333334	56747.35305853687	31458.674104960224	75009.4753281405
sod1∆	25	192	10.666666666666666	57582.62444356172	32412.004972555624	76141.90163874647
sod1∆	25	192	11	58453.55587927002	33449.03803607689	77323.12025660038
sod1∆	25	192	11.333333333333334	59283.136736075016	34580.687776882245	78448.6736382301
sod1∆	25	192	11.666666666666666	59824.35431904221	35843.57389997635	79183.20012569976
sod1∆	25	192	12	60659.312845436565	37065.574348112765	80316.71593826609
sod1∆	25	192	12.333333333333334	61525.91463910743	38340.90660863826	81493.61033788127
sod1∆	25	192	12.666666666666666	62492.86868717082	39748.82934908654	82807.28737379593
sod1∆	25	192	13	63665.504628781535	41111.53081242426	84401.09269011047
sod1∆	25	192	13.333333333333334	64972.24720789663	42483.734063078206	86178.05214814596
sod1∆	25	192	13.666666666666666	65892.80390994779	44042.74761070825	87430.40912572178
sod1∆	25	192	14	66745.08269413901	45671.30233284073	88590.27625347006
sod1∆	25	192	14.333333333333334	67499.91287627356	47342.96540903633	89617.84090139759
sod1∆	25	192	14.666666666666666	68058.05939053581	49165.120946371266	90377.84490291683
sod1∆	25	192	15	68800.70871126169	51008.15117595507	91389.3245364781
sod1∆	25	192	15.333333333333334	69634.65991740629	52916.2576301348	92525.48788082202
sod1∆	25	192	15.666666666666666	70511.3301413043	54810.127716143295	93720.22492247258
sod1∆	25	192	16	71352.81181291935	56664.54154782952	94867.36281186136
sod1∆	25	192	16.333333333333332	72189.55433054283	58569.27267955502	96008.38209578971
sod1∆	25	192	16.666666666666668	72972.13678075888	60501.73847847231	97075.8515035016
sod1∆	25	192	17	74021.95551226374	62332.63839958589	98508.29819436811
sod1∆	25	192	17.333333333333332	75496.3158842523	64010.16308230727	100520.89226301604
sod1∆	25	192	17.666666666666668	77165.51573234076	65951.48066845178	102800.66289030474
sod1∆	25	192	18	79458.4544506599	67680.21247407085	105934.37231455208
sod1∆	25	192	18.333333333333332	81775.40927982982	69895.72317776401	109103.24623806961
sod1∆	25	192	18.666666666666668	84081.11118999349	72461.7381580013	112259.00269895511
sod1∆	25	192	19	85992.6652762852	75770.43997999773	114876.97458130398
sod1∆	25	192	21.333333333333332	96776.7310143372	94438.08800505298	129673.22929522047
sod1∆	25	192	21.666666666666668	98391.59358361045	97572.03942752961	131892.63936497737
sod1∆	25	192	22	99647.85873572166	100495.00522516575	133619.848812677
sod1∆	25	192	22.333333333333332	100991.15727960825	103319.33818672098	135467.33238647907
sod1∆	25	192	22.666666666666668	102260.2169684774	105945.3029792002	137213.28839876014
sod1∆	25	192	23	103428.20736251744	108582.78174979039	138820.6828656902
sod1∆	25	192	23.333333333333332	104548.97717524064	111602.61645468736	140363.52724285354
sod1∆	25	192	23.666666666666668	105519.51614087424	114372.80157400937	141699.90562035085
sod1∆	25	192	24	106255.09836555821	117087.98958170388	142712.97046974907
sod1∆	25	192	24.333333333333332	106858.67881959386	120180.81411462967	143544.3722942598
sod1∆	25	192	24.666666666666668	107710.1727913868	123310.03919313049	144717.46596521413
sod1∆	25	192	25	108513.11545325028	126204.28186987655	145823.8876398585
sod1∆	25	192	25.333333333333332	109757.22358287903	129570.94623859128	147538.6286749975
sod1∆	25	192	25.666666666666668	110905.86227344748	132949.8447635117	149122.22523731674
sod1∆	25	192	26	112822.19925308834	136122.84850787232	151765.15487889768
sod1∆	25	192	26.333333333333332	114271.6081547139	139554.77254960174	153764.87857299397
sod1∆	25	192	26.666666666666668	116169.87888512482	142978.71891205056	156384.8657110032
sod1∆	25	192	27	117731.48768610359	146222.02407006882	158541.01218738803
sod1∆	25	192	27.333333333333332	119631.08387211198	149816.5812485931	161164.80700417238
sod1∆	25	192	27.666666666666668	120921.41606849172	153356.35717611684	162947.66991649332
sod1∆	25	192	28	122785.51785830384	156793.16858818216	165524.1702351329
sod1∆	25	192	28.333333333333332	124062.59169728718	160532.09009438418	167289.8762931076
sod1∆	25	192	28.666666666666668	125951.94529138054	163926.18691804397	169902.9801932887
sod1∆	25	192	29	127252.94461119064	167617.12136364466	171702.9321736903
sod1∆	25	192	29.333333333333332	128985.33820403961	171085.8889479605	174100.45200329527
sod1∆	25	192	29.666666666666668	130203.84703243959	174613.34673040584	175787.28120945836
sod1∆	25	192	30	132127.22648518736	178189.00145455534	178450.70775782663
sod1∆	25	192	30.333333333333332	133469.29935298976	181682.524466099	180309.7482090511
sod1∆	25	192	30.666666666666668	135306.28329046845	184737.5429346233	182855.1114824562
sod1∆	25	192	31	136781.44327556613	188562.30793172886	184899.76227614388
sod1∆	25	192	31.333333333333332	138475.29252371145	191917.35482026578	187248.2210671812
sod1∆	25	192	31.666666666666668	139701.82820958234	195336.4326255704	188949.22467492102
sod1∆	25	192	32	141029.56225505678	199126.5898276412	190791.0027999134
sod1∆	25	192	32.333333333333336	142441.2055090654	202661.38271739415	192749.66104041817
sod1∆	25	192	32.666666666666664	143851.91403403546	205668.22070837583	194707.51667803898
sod1∆	25	192	33	145733.61457567298	209276.7624195795	197319.8008971697
sod1∆	25	192	33.333333333333336	147721.88344243637	212302.32966744993	200080.96344012558
sod1∆	25	192	33.666666666666664	149763.87103355277	215559.00096977447	202917.7126913061
sod1∆	25	192	34	151738.70071156241	219162.85091135523	205662.10358241296
sod1∆	25	192	34.333333333333336	153765.46630971707	222894.03787973116	208479.6157202604
sod1∆	25	192	34.666666666666664	155323.92971292904	226055.2913503225	210646.7611800139
sod1∆	25	192	35	156811.4857740964	229615.50669134085	212715.82246415011
sod1∆	25	192	35.333333333333336	158339.33411994518	232963.57569163202	214841.4476319333
sod1∆	25	192	35.666666666666664	160067.45738317908	236543.84112092454	217246.33598068525
sod1∆	25	192	36	161822.2132185506	240318.23471855404	219688.963930189
sod1∆	25	192	36.333333333333336	163815.80329308435	244657.3815659815	222464.86914607187
sod1∆	25	192	36.666666666666664	166165.59595053902	248987.81726796262	225737.86125498216
sod1∆	25	192	37	168438.79103975702	253040.0238682889	228905.28478399906
sod1∆	25	192	37.333333333333336	170750.35796866714	256833.15439683353	232127.29227631693
sod1∆	25	192	37.666666666666664	173066.2546439784	260596.93563188903	235356.44995215026
sod1∆	25	192	38	175673.27834765066	263667.3859943097	238992.8562986777
sod1∆	25	192	38.333333333333336	178122.869707003	266786.7996555007	242410.92222015347
sod1∆	25	192	38.666666666666664	180801.26491640307	270209.8785410706	246149.62318375165
sod1∆	25	192	39	183410.95843794654	273249.0786440123	249793.78358266546
sod1∆	25	192	39.333333333333336	186019.86705440894	276524.79458994407	253438.16924757717
sod1∆	25	192	39.666666666666664	188367.9737970736	280448.58110313903	256719.35532032946
sod1∆	25	192	40	190576.89822797972	284159.458620159	259807.00354786473
sod1∆	25	192	40.333333333333336	192833.4821245764	287976.66057413956	262962.2124704223
sod1∆	25	192	40.666666666666664	195133.8860628541	291948.2937733481	266179.6604050189
sod1∆	25	192	41	197491.05936625268	295492.727018892	269477.5114517183
sod1∆	25	192	41.333333333333336	199802.92663628445	299010.6609410787	272712.95094863395
sod1∆	25	192	41.666666666666664	202209.56870427963	302655.2598429941	276082.0406956903
sod1∆	25	192	42	204690.04845341668	306296.4000466037	279555.56639030954
sod1∆	25	192	42.333333333333336	207061.7470754034	309629.88822118664	282877.76474200754
sod1∆	25	192	42.666666666666664	209866.21955389387	312986.06064085086	286807.4295354234
sod1∆	25	192	43	212899.25809081437	316329.54153062834	291058.8704932797
sod1∆	25	192	43.333333333333336	216126.76897960753	319714.9198062128	295584.60060807294
sod1∆	25	192	43.666666666666664	219108.14628043052	322786.11721865606	299766.724975265
sod1∆	25	192	44	222258.08906161797	326104.0169723477	304186.880113871
sod1∆	25	192	44.333333333333336	225267.90687834422	329770.65199109307	308411.8973537153
sod1∆	25	192	44.666666666666664	228224.35902465697	333341.81172514905	312563.4039758731
sod1∆	25	192	45	231228.48118202738	337050.85305841325	316783.25399314973
sod1∆	25	192	45.333333333333336	234440.16478022744	341069.32040502643	321296.20817063947
sod1∆	25	192	45.666666666666664	237577.4650044393	345231.9199688581	325706.16318962997
sod1∆	25	192	46	240440.24594046304	348776.2790533151	329731.53530793206
sod1∆	25	192	46.333333333333336	243426.74691807447	352322.79929612676	333932.1728063544
sod1∆	25	192	46.666666666666664	246328.262059599	355581.3951811462	338014.5326005987
sod1∆	25	192	47	249188.30920730386	359046.91162224277	342039.74772431375
sod1∆	25	192	47.333333333333336	252140.44869579747	362361.1663365344	346195.80820778233
sod1∆	25	192	47.666666666666664	255434.6845162758	365780.6346537062	350834.94017226074
sod1∆	25	192	48	258635.8167330624	369075.66928054905	355344.4196562838
sod1∆	25	192	48.333333333333336	261930.0514102383	372594.4242562443	359986.53923952504
sod1∆	25	192	48.666666666666664	265172.0491694827	375646.20324101433	364556.50163944135
sod1∆	25	192	49	268416.43929507444	378852.83543571533	369131.2622795715
sod1∆	25	192	49.333333333333336	271306.7682059457	381801.4963165495	373207.9657933349
sod1∆	25	192	49.666666666666664	274178.90054324217	384674.53198641946	377260.10044187604
sod1∆	25	192	50	277156.510471525	387702.6716584959	381462.18994784495
sod1∆	25	192	50.333333333333336	280342.8038770378	391075.3212783172	385960.05398073944
sod1∆	25	192	50.666666666666664	283511.7192623131	394416.5770511888	390434.67930022674
sod1∆	25	192	51	286853.9141642929	398033.26440254494	395155.3628936366
sod1∆	25	192	51.333333333333336	290144.9990879116	401592.3704562476	399805.2264163231
sod1∆	25	192	51.666666666666664	293264.8357799065	404858.93913457246	404214.38072454615
sod1∆	25	192	52	296380.75771462946	408165.8095558366	408619.1959413172
sod1∆	25	192	52.333333333333336	299475.4803816926	411562.163015823	412995.2113927315
sod1∆	25	192	52.666666666666664	302543.9889167524	415115.8928179209	417335.29761186097
sod1∆	25	192	53	305564.29499090917	418633.04256618227	421608.30234735046
sod1∆	25	192	53.333333333333336	308552.44408475835	422097.0783828349	425836.87229141354
sod1∆	25	192	53.666666666666664	311338.3151956223	425252.1355211601	429780.1364602438
sod1∆	25	192	54	314149.0491259636	428476.3976308134	433759.5042471
sod1∆	25	192	54.333333333333336	316961.3558668582	431668.1220365561	437742.0071441312
sod1∆	25	192	54.666666666666664	319821.6193926739	434946.74457267456	441793.345452399
sod1∆	25	192	55	322530.93412262347	438034.2930955072	445631.7285879957
sod1∆	25	192	55.333333333333336	325331.25610037165	441281.25381680386	449599.9086686197
sod1∆	25	192	55.666666666666664	327986.7234860334	444293.28290026146	453363.6278093019
sod1∆	25	192	56	330536.86379703926	447324.78672006173	456978.793165453
sod1∆	25	192	56.333333333333336	333182.71627932345	450598.0681880501	460730.3947856241
sod1∆	25	192	56.666666666666664	335992.0677119544	454273.77348911186	464714.65564287675
sod1∆	25	192	57	338708.7445148954	458034.2242666731	468568.2917957453
sod1∆	25	192	57.333333333333336	341366.94723555015	461879.3853914342	472339.74450680753
sod1∆	25	192	57.666666666666664	344129.2638136763	466098.2458884633	476259.70685608574
sod1∆	25	192	58	346820.7985495986	470232.0004844498	480079.99532617
sod1∆	25	192	58.333333333333336	349399.4918893421	474152.4970061881	483740.82886881504
sod1∆	25	192	58.666666666666664	351905.4367299371	477835.9931181228	487299.04514052754
sod1∆	25	192	59	354460.6669215675	481664.95014623104	490927.9072246763
sod1∆	25	192	59.333333333333336	356823.7278367533	485310.80910107715	494284.44980593794
sod1∆	25	192	59.666666666666664	359070.6212074511	489220.0016525771	497476.51108941925
sod1∆	25	192	60	361244.69326743303	493116.2803144001	500565.6030881956
sod1∆	25	192	60.333333333333336	363357.7286950961	497214.06564071967	503568.42360506026
sod1∆	25	192	60.666666666666664	365294.98418049945	500793.9012112535	506321.83560146624
sod1∆	25	192	61	367396.6969403209	504985.08589479164	509309.41082555364
sod1∆	25	192	61.333333333333336	369471.1940203846	508896.1908182267	512258.7263142287
sod1∆	25	192	61.666666666666664	371519.8544650996	513004.4292762714	515171.7240913583
sod1∆	25	192	62	373484.02718975424	516982.5158098908	517964.97297044046
sod1∆	25	192	62.333333333333336	375429.9838020914	521228.33469858987	520732.6859874335
sod1∆	25	192	62.666666666666664	377109.7700557062	524628.9471529472	523122.1219249214
sod1∆	25	192	63	378731.1430783079	528033.7687842498	525428.7244540205
sod1∆	25	192	63.333333333333336	380871.6078372801	532738.1144868148	528474.1841299623
sod1∆	25	192	63.666666666666664	383098.6879581497	537701.6982278285	531643.3434798069
sod1∆	25	192	64	385460.59593847033	543092.2202244597	535004.8774155407
sod1∆	25	192	64.33333333333333	387670.1410845986	548221.9613421906	538150.0396732012
sod1∆	25	192	64.66666666666667	389868.6478807857	553552.9393406004	541279.942992298
sod1∆	25	192	65	391757.6510632386	558005.5282656146	543969.5810622827
sod1∆	25	192	65.33333333333333	393851.4707091705	562542.0580068812	546951.231207597
sod1∆	25	192	65.66666666666667	395873.6934610652	566950.6303843928	549831.3092196491
sod1∆	25	192	66	398739.6426046562	573806.9607641698	553913.6761088583
sod1∆	25	192	66.33333333333333	401314.8253857216	580028.0456420162	557582.5024713955
sod1∆	25	192	66.66666666666667	403468.58187177713	585441.975214091	560651.3897638698
sod1∆	25	192	67	403996.5485816403	586540.2398228484	561403.7532619154
sod1∆	50	192	0	33191.66924755427	30905.612114302017	47881.000000000015
sod1∆	50	192	0.3333333333333333	33163.17843059201	30830.426764446507	47838.45425285711
sod1∆	50	192	0.6666666666666666	33097.35686601786	30673.213730028576	47740.16688415551
sod1∆	50	192	1	32996.007197932595	30463.002807963014	47588.84100042197
sod1∆	50	192	1.3333333333333333	32914.98395997335	30265.780202141697	47467.876413611404
sod1∆	50	192	1.6666666666666667	32847.43911573278	30071.013485804622	47367.04256096254
sod1∆	50	192	2	32837.155614213574	29950.855246441843	47351.6915467594
sod1∆	50	192	2.3333333333333335	32898.229320268074	29914.402388707495	47442.863685996934
sod1∆	50	192	2.6666666666666665	33021.4894897942	29923.21752624467	47626.88724731566
sod1∆	50	192	3	33206.669815187306	29974.738788193405	47903.40108024995
sod1∆	50	192	3.3333333333333335	33451.86722988496	30066.96697210621	48269.61673829239
sod1∆	50	192	3.6666666666666665	33733.266857932605	30195.613052403292	48690.018783203726
sod1∆	50	192	4	34064.22571051893	30348.728480330265	49184.618639524015
sod1∆	50	192	4.333333333333333	34416.08257546296	30530.22599814562	49710.63492881225
sod1∆	50	192	4.666666666666667	34779.26122751414	30733.59748699205	50253.775520372794
sod1∆	50	192	5	35131.04376364519	30957.919403988984	50780.06339935294
sod1∆	50	192	5.333333333333333	35551.24977748697	31182.897225793742	51408.95994449626
sod1∆	50	192	5.666666666666667	36040.822918970145	31365.858630614493	52142.003879968994
sod1∆	50	192	6	36545.86058282719	31533.908379957633	52898.57035952954
sod1∆	50	192	6.333333333333333	37078.734769249386	31676.352631945196	53697.23606190345
sod1∆	50	192	6.666666666666667	37622.09426442348	31810.828970522743	54512.03311764509
sod1∆	50	192	7	38092.30085379099	31947.847023939015	55217.46803987467
sod1∆	50	192	7.333333333333333	38481.49593459905	32129.23234929249	55801.59621169857
sod1∆	50	192	7.666666666666667	38854.04774599292	32311.377812383576	56360.93999204827
sod1∆	50	192	8	39196.35546537426	32510.78534014741	56875.0422257533
sod1∆	50	192	8.333333333333334	39561.76845847534	32702.70862334321	57424.02000234666
sod1∆	50	192	8.666666666666666	39939.04843335461	32892.19173997004	57991.01340826053
sod1∆	50	192	9	40346.33173929195	33071.260612457736	58603.30877462271
sod1∆	50	192	9.333333333333334	40776.25050819825	33256.917863254785	59249.869534825644
sod1∆	50	192	9.666666666666666	41199.76913286413	33440.660020927506	59887.03970455001
sod1∆	50	192	10	41605.05168943153	33634.069683520866	60496.990238907354
sod1∆	50	192	10.333333333333334	42004.70876397394	33839.56172367252	61098.67926954054
sod1∆	50	192	10.666666666666666	42370.70173463031	34053.744590096234	61649.86338320723
sod1∆	50	192	11	42721.08234867844	34279.3288523258	62177.692399998414
sod1∆	50	192	11.333333333333334	43083.769410880835	34520.7545556349	62724.22090848748
sod1∆	50	192	11.666666666666666	43467.831614795796	34762.706872187504	63303.13588407567
sod1∆	50	192	12	43852.08556083738	35011.01914173755	63882.52008871364
sod1∆	50	192	12.333333333333334	44230.22094330028	35268.66524615797	64452.85311577501
sod1∆	50	192	12.666666666666666	44592.968229414124	35532.19492573879	65000.137961641856
sod1∆	50	192	13	44929.148479738484	35820.065913433886	65507.48049006122
sod1∆	50	192	13.333333333333334	45237.329112081075	36117.836850779684	65972.68514958964
sod1∆	50	192	13.666666666666666	45539.12786545163	36432.80059049742	66428.36436845722
sod1∆	50	192	14	45838.89581369199	36779.12147604946	66881.0825601626
sod1∆	50	192	14.333333333333334	46169.307289414166	37164.48366267325	67380.2002112124
sod1∆	50	192	14.666666666666666	46503.878107694196	37567.32695567305	67885.72906606058
sod1∆	50	192	15	46898.454565499684	37986.90915422528	68482.08954128434
sod1∆	50	192	15.333333333333334	47295.48491250315	38424.17029065993	69082.33709302962
sod1∆	50	192	15.666666666666666	47762.139349148856	38907.98325682723	69788.07200964348
sod1∆	50	192	16	48252.356060022474	39391.693901507955	70529.70223518695
sod1∆	50	192	16.333333333333332	48768.05144605034	39896.22983541078	71310.16442725163
sod1∆	50	192	16.666666666666668	49209.287638599366	40458.52280274526	71978.16957229238
sod1∆	50	192	17	49661.487384072534	41045.2563972644	72662.9916526831
sod1∆	50	192	17.333333333333332	50053.14281658613	41612.673569191094	73256.30145793836
sod1∆	50	192	17.666666666666668	50411.24670105124	42203.71697052012	73798.92785886327
sod1∆	50	192	18	50809.810120559916	42800.627828907804	74403.02116023512
sod1∆	50	192	18.333333333333332	51243.447328156224	43394.498180736955	75060.4644288449
sod1∆	50	192	18.666666666666668	51810.616616337466	44034.29624947567	75920.65286664772
sod1∆	50	192	19	52541.61263150051	45025.296486700245	77029.79504075361
sod1∆	50	192	21.333333333333332	56652.4249143235	50748.53716339832	83277.05826734332
sod1∆	50	192	21.666666666666668	57170.49235161819	51942.04798389869	84065.53076468859
sod1∆	50	192	22	57576.282200994	52782.05959887666	84683.29822262793
sod1∆	50	192	22.333333333333332	57938.46334494397	53491.513632066075	85234.80602273185
sod1∆	50	192	22.666666666666668	58328.6728275924	54233.50122742148	85829.12949546758
sod1∆	50	192	23	58712.27545007937	54959.80983287694	86413.52657232205
sod1∆	50	192	23.333333333333332	59187.41890211173	55684.42936699375	87137.56722771256
sod1∆	50	192	23.666666666666668	59682.886500684246	56445.39444670981	87892.79646064164
sod1∆	50	192	24	60180.481538132015	57275.730423872104	88651.49063650797
sod1∆	50	192	24.333333333333332	60664.33236749621	58154.80945857909	89389.44050545871
sod1∆	50	192	24.666666666666668	61194.74714403859	59103.53862018505	90198.64585294004
sod1∆	50	192	25	61653.3680308137	60098.02625889139	90898.52094929482
sod1∆	50	192	25.333333333333332	62133.55321572048	61129.142108314176	91631.5004697277
sod1∆	50	192	25.666666666666668	62686.06052502834	62208.67569780904	92475.12286412847
sod1∆	50	192	26	63291.446690966186	63342.072410338034	93399.78635102363
sod1∆	50	192	26.333333333333332	63899.75922200129	64532.11391394486	94329.23317851436
sod1∆	50	192	26.666666666666668	64555.95281037559	65773.8932730667	95332.18711298908
sod1∆	50	192	27	65236.89632087613	67038.64179407255	96373.34929784227
sod1∆	50	192	27.333333333333332	65903.95204033605	68272.76777255292	97393.64806347464
sod1∆	50	192	27.666666666666668	66637.70577688763	69470.52860288856	98516.3849315357
sod1∆	50	192	28	67356.0928443806	70644.6135855405	99616.03052695718
sod1∆	50	192	28.333333333333332	68075.74369155864	71815.0164288612	100718.0246009916
sod1∆	50	192	28.666666666666668	68781.50899231186	73000.0851310737	101799.15424203846
sod1∆	50	192	29	69464.5588800468	74214.1598125053	102845.85911693824
sod1∆	50	192	29.333333333333332	70055.56776907892	75461.21871947167	103751.81298875384
sod1∆	50	192	29.666666666666668	70610.7650620156	76704.42092888187	104603.1166274558
sod1∆	50	192	30	71140.91918519899	77910.76523467242	105416.24065103264
sod1∆	50	192	30.333333333333332	71681.08950244384	79119.44638059828	106244.94640576569
sod1∆	50	192	30.666666666666668	72240.98571587777	80320.42012345028	107104.14678280955
sod1∆	50	192	31	72907.72212328904	81520.71435789061	108127.60665217262
sod1∆	50	192	31.333333333333332	73664.76530596016	82732.85023319563	109290.08936694555
sod1∆	50	192	31.666666666666668	74425.89755211283	83971.47089114434	110459.2750671527
sod1∆	50	192	32	75153.96841762832	85197.75197451048	111578.06870277041
sod1∆	50	192	32.333333333333336	75859.475266454	86434.56358221431	112662.55328605241
sod1∆	50	192	32.666666666666664	76473.77956007062	87693.20324424129	113607.13325712467
sod1∆	50	192	33	77021.25429784524	88935.65398902538	114449.1784801531
sod1∆	50	192	33.333333333333336	77545.92837610966	90200.97053276948	115256.3528206586
sod1∆	50	192	33.666666666666664	78073.81731724938	91517.4925826238	116068.66702627199
sod1∆	50	192	34	78633.2745667879	92910.53692529355	116929.7694784683
sod1∆	50	192	34.333333333333336	79204.96737128876	94337.3729257178	117809.92737806262
sod1∆	50	192	34.666666666666664	79819.06503781915	95866.24643701757	118755.61939293619
sod1∆	50	192	35	80468.34755716944	97446.37716859774	119755.77355684046
sod1∆	50	192	35.333333333333336	81142.49342471651	99045.82196991982	120794.52779325907
sod1∆	50	192	35.666666666666664	81832.48780336762	100693.63324537221	121858.01672295423
sod1∆	50	192	36	82546.34736855347	102427.53635694871	122958.62130179175
sod1∆	50	192	36.333333333333336	83242.66325972907	104167.56120377412	124032.50048355389
sod1∆	50	192	36.666666666666664	83934.78793926135	105949.12499593392	125100.22924456619
sod1∆	50	192	37	84628.31499825939	107767.82274477687	126170.43232704194
sod1∆	50	192	37.333333333333336	85317.71429735668	109540.39130224874	127234.5717394429
sod1∆	50	192	37.666666666666664	86006.77188494954	111282.9687075935	128298.48617699246
sod1∆	50	192	38	86747.52276476806	113024.7309210457	129442.55038816376
sod1∆	50	192	38.333333333333336	87518.7634240213	114785.68976887628	130634.0704210968
sod1∆	50	192	38.666666666666664	88423.10249519923	116578.37193788022	132031.69003957478
sod1∆	50	192	39	89333.75561718787	118387.12171474476	133439.57626982042
sod1∆	50	192	39.333333333333336	90319.10716791773	120182.18410801924	134963.51660167731
sod1∆	50	192	39.666666666666664	91290.77696595108	122010.61634625435	136466.87001420776
sod1∆	50	192	40	92236.78183098079	123830.41318234628	137931.05627769878
sod1∆	50	192	40.333333333333336	93038.49162027305	125575.74338074213	139172.32281595864
sod1∆	50	192	40.666666666666664	93832.53359386136	127355.75717814142	140402.0886431944
sod1∆	50	192	41	94570.0483363564	129181.8748598096	141544.63662724433
sod1∆	50	192	41.333333333333336	95359.93246087346	131051.36367330542	142768.6623735986
sod1∆	50	192	41.666666666666664	96317.20554759208	132994.5136418827	144252.55670463096
sod1∆	50	192	42	97348.99369509022	135008.13622641642	145852.54006626664
sod1∆	50	192	42.333333333333336	98452.82631573665	137126.33956013317	147564.90290814647
sod1∆	50	192	42.666666666666664	99558.0150659493	139184.32185499388	149280.0466553921
sod1∆	50	192	43	100678.94446247004	141274.33968614583	151020.30300157616
sod1∆	50	192	43.333333333333336	101690.70010544296	143387.54965801397	152591.65170590876
sod1∆	50	192	43.666666666666664	102695.29442866717	145596.81207897206	154152.4228075379
sod1∆	50	192	44	103699.09401703613	147758.63364644122	155712.49605688345
sod1∆	50	192	44.333333333333336	104727.93620321537	149999.45460682505	157312.04137700645
sod1∆	50	192	44.666666666666664	105728.86147827412	152166.15432804587	158868.71510010792
sod1∆	50	192	45	106732.23813201587	154269.4036672539	160429.72200854222
sod1∆	50	192	45.333333333333336	107739.41845083544	156274.635196458	161997.16604563693
sod1∆	50	192	45.666666666666664	108737.50038059332	158271.72661265873	163550.95943771175
sod1∆	50	192	46	109786.8473558389	160262.83891871493	165185.10255193306
sod1∆	50	192	46.333333333333336	110861.24790793806	162298.5615975726	166858.83116712613
sod1∆	50	192	46.666666666666664	112006.78242111104	164419.17061777433	168644.00297388562
sod1∆	50	192	47	113224.7933984415	166681.36763494078	170542.8251674754
sod1∆	50	192	47.333333333333336	114503.5915727747	168973.53381714976	172537.18549290774
sod1∆	50	192	47.666666666666664	115801.45974014986	171263.2520731859	174562.08833346196
sod1∆	50	192	48	117146.62317084844	173626.85659198015	176661.62319551653
sod1∆	50	192	48.333333333333336	118472.90400910981	175925.96060410654	178732.51708178184
sod1∆	50	192	48.666666666666664	119798.33743195614	178141.00511536666	180802.90320510181
sod1∆	50	192	49	121103.87899006967	180280.02042054074	182843.005777156
sod1∆	50	192	49.333333333333336	122388.5801820512	182416.10099029366	184851.298068312
sod1∆	50	192	49.666666666666664	123653.13579965993	184487.0667951611	186828.82289487502
sod1∆	50	192	50	124916.63767000429	186601.6166407802	188805.41095072922
sod1∆	50	192	50.333333333333336	126155.74713759708	188805.1236873678	190744.52383857835
sod1∆	50	192	50.666666666666664	127450.14308226595	191185.69188623596	192770.87186043416
sod1∆	50	192	51	128771.50943978364	193596.65258702784	194840.18873651893
sod1∆	50	192	51.333333333333336	130169.17473443369	196058.3270746487	197029.80644281156
sod1∆	50	192	51.666666666666664	131586.98605848325	198486.53774678233	199251.8310797599
sod1∆	50	192	52	133017.80699973612	200925.8102912783	201495.09917072445
sod1∆	50	192	52.333333333333336	134399.77014767312	203256.31776168649	203662.57368743946
sod1∆	50	192	52.666666666666664	135887.28501794473	205614.5204144473	205996.47238341163
sod1∆	50	192	53	137346.65047095955	208142.4468564135	208287.07902223206
sod1∆	50	192	53.333333333333336	138850.8937601255	210707.5888873454	210649.02220136533
sod1∆	50	192	53.666666666666664	140487.21507757876	213376.71085919716	213219.37524316076
sod1∆	50	192	54	142192.42972491297	216168.17532030458	215899.06809400892
sod1∆	50	192	54.333333333333336	143852.65239002008	219085.39763198147	218509.14454015894
sod1∆	50	192	54.666666666666664	145562.57483111232	222032.49526332275	221198.4637236875
sod1∆	50	192	55	147307.59539627295	225205.4743183829	223944.13089615692
sod1∆	50	192	55.333333333333336	149037.4866951626	228495.55914291827	226667.12353672046
sod1∆	50	192	55.666666666666664	150830.03012493992	232014.7621167147	229489.90960083544
sod1∆	50	192	56	152660.92899051448	235679.15546842536	232374.3146028773
sod1∆	50	192	56.333333333333336	154535.0411045877	239540.08222852167	235328.05918895442
sod1∆	50	192	56.666666666666664	156419.4367421803	243483.0818477564	238299.282931327
sod1∆	50	192	57	158316.96385015003	247566.9626059258	241292.48512559826
sod1∆	50	192	57.333333333333336	160237.02383183586	251863.82486933083	244322.5167745574
sod1∆	50	192	57.666666666666664	162189.85195172037	256271.49933154572	247405.57067250428
sod1∆	50	192	58	164191.17902087767	260883.46114268454	250566.5488272599
sod1∆	50	192	58.333333333333336	166227.18141107901	265775.15089038224	253783.68647098792
sod1∆	50	192	58.666666666666664	168273.38638589068	270926.4261882739	257018.34320699747
sod1∆	50	192	59	170321.5390152417	276127.71370604605	260257.46559686118
sod1∆	50	192	59.333333333333336	172358.34345027394	281522.26691195375	263480.0009917772
sod1∆	50	192	59.666666666666664	174353.89215883095	286997.67294626974	266638.56390107534
sod1∆	50	192	60	176343.0059728927	292665.07293829904	269788.2082473349
sod1∆	50	192	60.333333333333336	178368.6291366647	298756.18663464434	272996.9483459398
sod1∆	50	192	60.666666666666664	180374.18439927322	305107.8946964989	276175.16332843545
sod1∆	50	192	61	182385.8902154207	311683.68907061673	279364.3749668814
sod1∆	50	192	61.333333333333336	184407.5102800981	318510.7104413516	282570.5515216962
sod1∆	50	192	61.666666666666664	186451.7576269644	325504.2631020478	285813.8719336612
sod1∆	50	192	62	188464.09987214778	332096.4206240177	289007.7958246648
sod1∆	50	192	62.333333333333336	190481.4950433602	338733.1572488647	292210.94471234747
sod1∆	50	192	62.666666666666664	192505.33476391697	345434.41152282944	295425.5260904646
sod1∆	50	192	63	194556.2429922683	352217.11589419236	298684.31565737183
sod1∆	50	192	63.333333333333336	196620.37922228625	359021.5489929771	301965.3449552001
sod1∆	50	192	63.666666666666664	198671.97085338496	365825.8129810371	305227.6357361687
sod1∆	50	192	64	200726.54992021728	372707.1506952687	308495.8655178939
sod1∆	50	192	64.33333333333333	202748.12680387823	379452.31762925535	311712.74810938095
sod1∆	50	192	64.66666666666667	204850.04691585805	386761.4483959415	315058.67606129753
sod1∆	50	192	65	206962.53394645368	394139.57912581984	318422.6426765007
sod1∆	50	192	65.33333333333333	208982.88979122054	401146.0205193807	321641.0288088151
sod1∆	50	192	65.66666666666667	210919.9811151659	407541.9294261932	324727.8049568698
sod1∆	50	192	66	212775.82383943087	413506.28169833805	327686.0467988584
sod1∆	50	192	66.33333333333333	214436.38077580585	418381.65023339115	330333.7703174799
sod1∆	50	192	66.66666666666667	215960.60075373104	422715.9182197295	332764.7428596853
sod1∆	50	192	67	217231.16324429912	426467.00681543874	334791.6198200838
sod1∆	50	192	67.33333333333333	218232.08250896214	429417.83851442346	336388.63983712526
sod1∆	50	192	67.66666666666667	218609.48275466578	430525.7903515787	336990.869037685
sod1∆	400	192	0	40411.46458730391	27708.739413283227	47881.000000000015
sod1∆	400	192	0.3333333333333333	40339.01322663737	27673.262612196013	47793.785553421614
sod1∆	400	192	0.6666666666666666	40204.278371592416	27648.993109112067	47631.6030500231
sod1∆	400	192	1	40057.95373652769	27528.048137055604	47455.47958784657
sod1∆	400	192	1.3333333333333333	39923.51013265612	27465.98118382634	47293.66578093321
sod1∆	400	192	1.6666666666666667	39826.50572935058	27350.946303622026	47176.91850518624
sod1∆	400	192	2	39806.949852187914	27246.176172918436	47153.38305815173
sod1∆	400	192	2.3333333333333335	39848.303730234795	27130.94246020376	47203.152560039234
sod1∆	400	192	2.6666666666666665	39906.689002189225	27033.414526992514	47273.420795610684
sod1∆	400	192	3	39997.308985337964	26928.25648787223	47382.48762279077
sod1∆	400	192	3.3333333333333335	40068.02291175877	26863.52398858679	47467.59900873103
sod1∆	400	192	3.6666666666666665	40133.73791308654	26823.53799386414	47546.69583435754
sod1∆	400	192	4	40229.07334320334	26763.90883280466	47661.44850290034
sod1∆	400	192	4.333333333333333	40311.30058434368	26717.164791789677	47760.42669342032
sod1∆	400	192	4.666666666666667	40402.002964954525	26673.798315062457	47869.61028364624
sod1∆	400	192	5	40503.899459694556	26644.98809793703	47992.27353729884
sod1∆	400	192	5.333333333333333	40628.041914158865	26620.268086028173	48141.72319932953
sod1∆	400	192	5.666666666666667	40714.97119773404	26642.571951856273	48246.377903491935
sod1∆	400	192	6	40778.75299072249	26690.59804286586	48323.16747299153
sod1∆	400	192	6.333333333333333	40854.04555748657	26732.00285549003	48413.817816189454
sod1∆	400	192	6.666666666666667	40926.414864737475	26771.55849520734	48500.95114691258
sod1∆	400	192	7	40985.7660964894	26824.07726060571	48572.41243055769
sod1∆	400	192	7.333333333333333	41110.22917130135	26827.791404126343	48722.27637754368
sod1∆	400	192	7.666666666666667	41254.30548729187	26826.996353099486	48895.76536538718
sod1∆	400	192	8	41397.55851216246	26838.82587045343	49068.27259589207
sod1∆	400	192	8.333333333333334	41565.62958445132	26839.413189475865	49270.67822186105
sod1∆	400	192	8.666666666666666	41737.99399197018	26837.418237990758	49478.26784352759
sod1∆	400	192	9	41861.14998854747	26884.348459550965	49626.60098811146
sod1∆	400	192	9.333333333333334	41996.98141184469	26922.24125421898	49790.20892644541
sod1∆	400	192	9.666666666666666	42108.14442788089	26969.590510847705	49924.110249099984
sod1∆	400	192	10	42233.579681044175	26999.726532860637	50075.209970574164
sod1∆	400	192	10.333333333333334	42372.09158587312	27013.397890083797	50242.07020637569
sod1∆	400	192	10.666666666666666	42501.17586909508	27018.425879874696	50397.58118299969
sod1∆	400	192	11	42597.02260571068	27043.886844824145	50513.05496573194
sod1∆	400	192	11.333333333333334	42711.014462209154	27048.81038131129	50650.394949305526
sod1∆	400	192	11.666666666666666	42770.914265089355	27088.279266545327	50722.56594552166
sod1∆	400	192	12	42813.60785271339	27135.931137063988	50774.00681346723
sod1∆	400	192	12.333333333333334	42829.05699981126	27199.370720479037	50792.62146289343
sod1∆	400	192	12.666666666666666	42880.71852115773	27212.8943782319	50854.86911622974
sod1∆	400	192	13	42887.89664647013	27244.59870108897	50863.5182296901
sod1∆	400	192	13.333333333333334	42924.19895120052	27219.22675120546	50907.26019339997
sod1∆	400	192	13.666666666666666	42954.59749877802	27187.677574619993	50943.88896106112
sod1∆	400	192	14	43013.51225375681	27122.44856517547	51014.879548108955
sod1∆	400	192	14.333333333333334	43046.69101758908	27086.077482377666	51054.859689755205
sod1∆	400	192	14.666666666666666	43103.20554010978	27034.059379722992	51122.960365843035
sod1∆	400	192	15	43151.43956318623	27018.528485920848	51181.08407036013
sod1∆	400	192	15.333333333333334	43199.06547004598	27003.363805715442	51238.475992644126
sod1∆	400	192	15.666666666666666	43268.71215386466	27027.00152186659	51322.40602295958
sod1∆	400	192	16	43335.04641559082	27050.92856666922	51402.34631854948
sod1∆	400	192	16.333333333333332	43424.54915745665	27079.185958468468	51510.21035639758
sod1∆	400	192	16.666666666666668	43536.99635083984	27083.853074504816	51645.73088882231
sod1∆	400	192	17	43656.94471735132	27083.56145081711	51790.29794924075
sod1∆	400	192	17.333333333333332	43726.82299103636	27071.25531522652	51874.52125493407
sod1∆	400	192	17.666666666666668	43798.216257799555	27066.633284788197	51960.5727832704
sod1∆	400	192	18	43868.93538283681	27054.20613612315	52045.813968308204
sod1∆	400	192	18.333333333333332	43911.446261112316	27074.908378874115	52097.05544555271
sod1∆	400	192	18.666666666666668	44004.354871507654	27101.82549429153	52209.04776323083
sod1∆	400	192	19	44157.07169351346	27154.81113362474	52393.141290300104
sod1∆	400	192	21.333333333333332	44868.830047744195	27633.2061497197	53251.26896273574
sod1∆	400	192	21.666666666666668	44978.34481485559	27692.938745344392	53383.32426941774
sod1∆	400	192	22	45069.59629445705	27695.670109639894	53493.3612310449
sod1∆	400	192	22.333333333333332	45104.50955489107	27676.106314325458	53535.46285102643
sod1∆	400	192	22.666666666666668	45137.390470061844	27641.884744916715	53575.1141586916
sod1∆	400	192	23	45162.1546459566	27599.2496493733	53604.9777430555
sod1∆	400	192	23.333333333333332	45173.33195143874	27579.863014676488	53618.45675122879
sod1∆	400	192	23.666666666666668	45202.107467409085	27550.4818582009	53653.1581520152
sod1∆	400	192	24	45230.95405901683	27533.03955073251	53687.94561994406
sod1∆	400	192	24.333333333333332	45266.629664185464	27519.431064308348	53730.9690086769
sod1∆	400	192	24.666666666666668	45291.308100839204	27521.639032157767	53760.73055827093
sod1∆	400	192	25	45370.93974482737	27501.37627482362	53856.76600722955
sod1∆	400	192	25.333333333333332	45430.95569796589	27516.954320547713	53929.146791682
sod1∆	400	192	25.666666666666668	45530.90400411293	27536.99248954047	54049.69041420807
sod1∆	400	192	26	45607.73455851461	27591.118793472222	54142.355525298844
sod1∆	400	192	26.333333333333332	45715.27429259326	27638.103570982392	54272.063081011875
sod1∆	400	192	26.666666666666668	45802.017830331904	27700.501307910832	54376.69114904521
sod1∆	400	192	27	45913.08344528458	27747.70803221387	54510.660574362504
sod1∆	400	192	27.333333333333332	45989.291732427264	27799.450943536955	54602.587436430185
sod1∆	400	192	27.666666666666668	46084.4766543209	27827.839753884527	54717.40843817898
sod1∆	400	192	28	46152.74047966952	27866.632614535254	54799.75701776492
sod1∆	400	192	28.333333333333332	46210.21085996633	27901.326674686108	54869.08667006038
sod1∆	400	192	28.666666666666668	46244.09454290288	27931.383956791313	54909.963049869446
sod1∆	400	192	29	46296.719630754036	27933.849557076508	54973.449514768
sod1∆	400	192	29.333333333333332	46317.32490516078	27932.914893039706	54998.30785954205
sod1∆	400	192	29.666666666666668	46339.19052829512	27906.986325244743	55024.68689107547
sod1∆	400	192	30	46345.887351090496	27880.538809889335	55032.766083205584
sod1∆	400	192	30.333333333333332	46384.446457215134	27836.14169070832	55079.28498744068
sod1∆	400	192	30.666666666666668	46420.13818234256	27816.059015103867	55122.345145211635
sod1∆	400	192	31	46493.20718296717	27798.95001195743	55210.50063802656
sod1∆	400	192	31.333333333333332	46562.566694996065	27803.607699200395	55294.18279700153
sod1∆	400	192	31.666666666666668	46639.71998592476	27804.071128895812	55387.27048150748
sod1∆	400	192	32	46689.16279392008	27817.074632929478	55446.925959037195
sod1∆	400	192	32.333333333333336	46721.87746628557	27814.16389654951	55486.39857277683
sod1∆	400	192	32.666666666666664	46732.147320997225	27812.062607395652	55498.78998498242
sod1∆	400	192	33	46746.25737003349	27799.0279712774	55515.81497394374
sod1∆	400	192	33.333333333333336	46757.95029656355	27791.562146952954	55529.92355876384
sod1∆	400	192	33.666666666666664	46763.43588035196	27788.812134255128	55536.54243653656
sod1∆	400	192	34	46773.03241015132	27794.353612969637	55548.1215909193
sod1∆	400	192	34.333333333333336	46785.93182303698	27801.96644074798	55563.68605752456
sod1∆	400	192	34.666666666666664	46797.86490965636	27823.311324259637	55578.084613334715
sod1∆	400	192	35	46831.85056794871	27837.28642505756	55619.09229655492
sod1∆	400	192	35.333333333333336	46883.99350431838	27856.01033113253	55682.00979060697
sod1∆	400	192	35.666666666666664	46945.51302735146	27887.5563482581	55756.242841400526
sod1∆	400	192	36	47029.29816644007	27928.951772920234	55857.34538687835
sod1∆	400	192	36.333333333333336	47133.58266157774	27983.96145360216	55983.18828790115
sod1∆	400	192	36.666666666666664	47233.117362220466	28062.428229583365	56103.30363715803
sod1∆	400	192	37	47361.40955987428	28126.711961659905	56258.128599550604
sod1∆	400	192	37.333333333333336	47488.879505313205	28183.211793329265	56411.96789748321
sod1∆	400	192	37.666666666666664	47583.29681260487	28247.10854247923	56525.921307869525
sod1∆	400	192	38	47654.012065663555	28296.993723137777	56611.2707857111
sod1∆	400	192	38.333333333333336	47713.384922587036	28330.450605581333	56682.93217028683
sod1∆	400	192	38.666666666666664	47738.118816845716	28375.67678327973	56712.785712569545
sod1∆	400	192	39	47772.53164614635	28402.505883167065	56754.32203595801
sod1∆	400	192	39.333333333333336	47835.45918793476	28408.14200084712	56830.276886250926
sod1∆	400	192	39.666666666666664	47900.03406341773	28412.71194335847	56908.221763533664
sod1∆	400	192	40	47970.87614309985	28423.65520258008	56993.73338037831
sod1∆	400	192	40.333333333333336	48039.93125340697	28436.113719452416	57077.08993688697
sod1∆	400	192	40.666666666666664	48100.72771837075	28465.683119846406	57150.479052769806
sod1∆	400	192	41	48150.01041049424	28500.915444120074	57209.97065951814
sod1∆	400	192	41.333333333333336	48206.89075453991	28532.082794542534	57278.63498287742
sod1∆	400	192	41.666666666666664	48269.176161886666	28552.18652986815	57353.82562991793
sod1∆	400	192	42	48343.368503433725	28562.96031551396	57443.3922957151
sod1∆	400	192	42.333333333333336	48412.63085927978	28569.814409907875	57527.0093555633
sod1∆	400	192	42.666666666666664	48484.91139595874	28575.431021680797	57614.27215744278
sod1∆	400	192	43	48553.49509174392	28592.9256777344	57697.073762883265
sod1∆	400	192	43.333333333333336	48621.23671169402	28632.674360957226	57778.86055985453
sod1∆	400	192	43.666666666666664	48678.4230597204	28704.127388490095	57847.90503098741
sod1∆	400	192	44	48754.16497818877	28773.35764892014	57939.35473961175
sod1∆	400	192	44.333333333333336	48849.372488520356	28831.672461476515	58054.31014747024
sod1∆	400	192	44.666666666666664	48943.932965496024	28871.258475677383	58168.48786081167
sod1∆	400	192	45	49034.65605964254	28889.18415539463	58278.03541489589
sod1∆	400	192	45.333333333333336	49126.45808005459	28877.280256055674	58388.88906452216
sod1∆	400	192	45.666666666666664	49199.25978616919	28857.765181945437	58476.801629054826
sod1∆	400	192	46	49237.48024050629	28847.12541419824	58522.95602533181
sod1∆	400	192	46.333333333333336	49291.5551709621	28838.73162691157	58588.2570065014
sod1∆	400	192	46.666666666666664	49355.34067471736	28832.886760814243	58665.28596551961
sod1∆	400	192	47	49433.50666703698	28832.501799773654	58759.68333020174
sod1∆	400	192	47.333333333333336	49520.66193167876	28841.43946255518	58864.93942720504
sod1∆	400	192	47.666666666666664	49626.27075300523	28841.66874687766	58992.48557484355
sod1∆	400	192	48	49717.06016871736	28839.20639145294	59102.13746294574
sod1∆	400	192	48.333333333333336	49802.09147916832	28833.53866895058	59204.83784163682
sod1∆	400	192	48.666666666666664	49897.61353039293	28832.62851745289	59320.21222688542
sod1∆	400	192	49	49988.76578973144	28823.422064797407	59430.311940245454
sod1∆	400	192	49.333333333333336	50070.53487220015	28816.33960836863	59529.08076518917
sod1∆	400	192	49.666666666666664	50137.74993258266	28803.73805793348	59610.27172734586
sod1∆	400	192	50	50191.17085274375	28785.700993249156	59674.80160096171
sod1∆	400	192	50.333333333333336	50220.50316094871	28755.720418152614	59710.234069940074
sod1∆	400	192	50.666666666666664	50257.417486435195	28735.441323441388	59754.82583807669
sod1∆	400	192	51	50319.15965968657	28721.02585640345	59829.41032095276
sod1∆	400	192	51.333333333333336	50400.7187074501	28715.92656503656	59927.93581118893
sod1∆	400	192	51.666666666666664	50505.440005046155	28718.34238127783	60054.44565050028
sod1∆	400	192	52	50628.95084805153	28732.794693808748	60203.6598193036
sod1∆	400	192	52.333333333333336	50758.28419773528	28754.583771308386	60359.91443089475
sod1∆	400	192	52.666666666666664	50877.53029353205	28778.412013743105	60503.98772711018
sod1∆	400	192	53	51000.802337028384	28799.250461753854	60652.9308548368
sod1∆	400	192	53.333333333333336	51119.067349962905	28816.0286781243	60795.82966166592
sod1∆	400	192	53.666666666666664	51237.43488541548	28839.457367480692	60938.857639055204
sod1∆	400	192	54	51354.72097933778	28872.08169702273	61080.58408108252
sod1∆	400	192	54.333333333333336	51484.348171819904	28943.989655307694	61237.2293092835
sod1∆	400	192	54.666666666666664	51621.168283929415	29043.70175019659	61402.57350945402
sod1∆	400	192	55	51768.81720247873	29201.628964266947	61581.01195327325
sod1∆	400	192	55.333333333333336	51935.9365476265	29397.82758591903	61782.99084799837
sod1∆	400	192	55.666666666666664	52126.62875833282	29668.474702343054	62013.47238310405
sod1∆	400	192	56	52326.96309559016	29974.008605948577	62255.622466589186
sod1∆	400	192	56.333333333333336	52537.473023747385	30375.750100332247	62510.08806214165
sod1∆	400	192	56.666666666666664	52761.08087695796	30851.734840230605	62780.40435979209
sod1∆	400	192	57	52994.97038469284	31445.010008443263	63063.1696019338
sod1∆	400	192	57.333333333333336	53240.10700943209	32153.639581082487	63359.55368052109
sod1∆	400	192	57.666666666666664	53515.477647944426	33037.818415850714	63692.51841625887
sod1∆	400	192	58	53822.68256467504	34107.621636727294	64064.00793247621
sod1∆	400	192	58.333333333333336	54146.2784823095	35388.96594489914	64455.35503648332
sod1∆	400	192	58.666666666666664	54481.14168350629	36819.47533859358	64860.36782541518
sod1∆	400	192	59	54863.30659036479	38647.49496593204	65322.64005219097
sod1∆	400	192	59.333333333333336	55244.40863369352	40697.56400814551	65783.67790228434
sod1∆	400	192	59.666666666666664	55645.64954376825	43012.96125011883	66269.13368307767
sod1∆	400	192	60	56070.97342437175	45653.6612417074	66783.78822219747
sod1∆	400	192	60.333333333333336	56499.069634693646	48544.39970579494	67301.8604014591
sod1∆	400	192	60.666666666666664	56954.55612432887	51717.78671425131	67853.14858128261
sod1∆	400	192	61	57497.016610329694	55642.48030370581	68509.79578512341
sod1∆	400	192	61.333333333333336	58039.13534897057	59761.3711349619	69166.12828204544
sod1∆	400	192	61.666666666666664	58604.05072679237	64229.845559780115	69850.16451545649
sod1∆	400	192	62	59220.12536903967	69287.00398528438	70596.2678765255
sod1∆	400	192	62.333333333333336	59839.86190424985	74505.31721844205	71346.93124098152
sod1∆	400	192	62.666666666666664	60452.73613377639	79720.89409030754	72089.4048267395
sod1∆	400	192	63	61131.14504117193	85558.49912112874	72911.41147666523
sod1∆	400	192	63.333333333333336	61887.088900623596	91696.55782417784	73827.53655323875
sod1∆	400	192	63.666666666666664	62686.5468064043	98067.67304337514	74796.59077440762
sod1∆	400	192	64	63520.49557295406	104912.72699366426	75807.66329552387
sod1∆	400	192	64.33333333333333	64396.80518162753	111970.81521670066	76870.32243100449
sod1∆	400	192	64.66666666666667	65304.78877514546	119421.4217994991	77971.63501678295
sod1∆	400	192	65	66223.20532958079	127093.21715112148	79085.85106883156
sod1∆	400	192	65.33333333333333	67184.11833282483	135114.6943602022	80251.88797700012
sod1∆	400	192	65.66666666666667	68163.3485318027	143415.3301767204	81440.42657544957
sod1∆	400	192	66	69115.87831521782	151469.4400141868	82596.81963085315
sod1∆	400	192	66.33333333333333	70167.67439878389	160536.1590372511	83874.02021429013
sod1∆	400	192	66.66666666666667	71201.14219003715	169563.49713501203	85129.26291893062
sod1∆	400	192	67	72286.09006354462	178728.24121837976	86447.34640535993
sod1∆	400	192	67.33333333333333	73462.22340331244	188046.11170098456	87876.56670361389
sod1∆	400	192	67.66666666666667	74486.21812941236	196225.83769384728	89121.20855314887
sod1∆	400	192	68	75236.44532889902	201765.4058270601	90033.26621142424
sod1∆	400	192	68.33333333333333	75491.71182124324	203663.9470513444	90343.62911467615
sod2∆	0	384	0	31610.513856464484	11049.435415000884	47881.000000000015
[truncated: 997 more rows]
