# Supplementary material for: Genetically controlled mtDNA deletions prevent ROS damage by arresting oxidative phosphorylation
Source: eLife. 2022 Jul 8;11:e76095. doi: 10.7554/eLife.76095 (PMC9427111; doi:10.7554/eLife.76095)
Supplement: Figure 4—source data 1. — Data are shown in Figure 4A and B and in Figure 4—figure supplement 1B. [file elife-76095-fig4-data1.xlsx]

## Sheet: Data S27 - SOD adaptation
README: Control doubling time used for normalization: 2.88h (12.5), 3.04h (50), 7.31h (400)
Strain	Environment	Concentration	Cycle	N	Absolute normalized doubling time	Absolute normalized doubling time S.D	Generations
sod2∆	Paraquat	50 µg/mL	0	15	9.285458573500161	0.5855037230511061	0
sod2∆	Paraquat	50 µg/mL	1	15	9.285458573500161	0.5855037230511061	3.3963222278646072
sod2∆	Paraquat	50 µg/mL	2	15	8.056921815615217	0.9486087041050294	7.289984786424413
sod2∆	Paraquat	50 µg/mL	3	15	8.40631712165727	0.8066711465810043	11.018216214147465
sod2∆	Paraquat	50 µg/mL	4	15	8.357642803308382	0.7758557902289281	14.762254626471261
sod2∆	Paraquat	50 µg/mL	5	15	8.0638370910833	0.6523111126009151	18.601420177898596
sod2∆	Paraquat	50 µg/mL	6	15	8.17758501778311	1.6750130731540342	22.503832825883833
sod2∆	Paraquat	50 µg/mL	7	15	7.530725019488356	0.7114647107083074	26.51827647218087
sod2∆	Paraquat	50 µg/mL	8	15	6.944172594725711	1.368887638549522	30.73674834380553
sod2∆	Paraquat	50 µg/mL	9	15	6.082494952406011	1.603227902687814	35.48496924065225
sod2∆	Paraquat	50 µg/mL	10	15	5.149916468407783	1.605201171627961	40.56737246818527
sod2∆	Paraquat	50 µg/mL	11	15	5.218291120350711	1.7643702998329402	45.593909033694544
sod2∆	Paraquat	50 µg/mL	12	15	5.057476596597321	1.9748403811592066	50.6064526682274
sod1∆	Paraquat	12.5 µg/mL	0	8	7.271270853249135	0.8169785560148258	0
sod1∆	Paraquat	12.5 µg/mL	1	8	7.271270853249135	0.8169785560148258	3.90080094221591
sod1∆	Paraquat	12.5 µg/mL	2	8	4.885988779945444	1.4341300509167094	8.569904718753227
sod1∆	Paraquat	12.5 µg/mL	3	5	4.1641789908251585	1.77299277233802	14.517141297973655
sod1∆	Paraquat	12.5 µg/mL	4	7	3.5905336860021073	0.6477960477285315	21.500172465633547
sod1∆	Paraquat	12.5 µg/mL	5	7	3.1391289549813357	0.4370385405845695	28.630678998350138
sod1∆	Paraquat	12.5 µg/mL	6	8	3.2594361321213383	0.6246625192211157	35.445432245310016
sod1∆	Paraquat	12.5 µg/mL	7	8	3.174935030037121	0.5766402917505847	42.521865739458576
sod1∆	Paraquat	12.5 µg/mL	8	8	3.1639924840149303	0.6819548717874351	49.5909753299367
sod1∆	Paraquat	12.5 µg/mL	9	8	3.1192744922826505	0.47835122948454556	56.81706889130747
sod1∆	Paraquat	12.5 µg/mL	10	8	3.2447479146944067	0.7419748380800942	63.956751889695525
sod1∆	Paraquat	12.5 µg/mL	11	8	3.114010939302111	0.6746887656192794	71.21870590389607
sod1∆	Paraquat	12.5 µg/mL	12	8	3.08772961520847	0.44133521988341995	78.22033121649592
sod2∆	Paraquat	12.5 µg/mL	0	15	6.12692043379818	0.4205636367537049	0
sod2∆	Paraquat	12.5 µg/mL	1	15	6.12692043379818	0.4205636367537049	4.183612619927994
sod2∆	Paraquat	12.5 µg/mL	2	15	5.648068056409354	0.39151292455856307	8.818110155364792
sod2∆	Paraquat	12.5 µg/mL	3	15	5.50081248208393	0.3640977466829653	13.531447395545767
sod2∆	Paraquat	12.5 µg/mL	4	15	5.5283346836785094	0.35478552019695664	18.23932353488608
sod2∆	Paraquat	12.5 µg/mL	5	15	5.490199362620812	0.3639528756538172	22.99811314869388
sod2∆	Paraquat	12.5 µg/mL	6	15	5.481550307263235	0.3388937992909355	27.763199935346137
sod2∆	Paraquat	12.5 µg/mL	7	15	5.29566600154226	0.572785050983116	32.63205478249743
sod2∆	Paraquat	12.5 µg/mL	8	15	5.196233274087442	0.6427324785955719	37.432442300380536
sod2∆	Paraquat	12.5 µg/mL	9	15	5.073961002958806	0.6687540998834162	42.429397675822
sod2∆	Paraquat	12.5 µg/mL	10	15	5.086120172146991	0.747679510577389	47.358888305441
sod2∆	Paraquat	12.5 µg/mL	11	15	4.822156916056346	1.0435541085533773	52.60820540179942
sod2∆	Paraquat	12.5 µg/mL	12	15	5.205820458066516	0.839803450104163	57.496181378941195
Founder	Paraquat	400 µg/mL	0	12	7.612993373163308	0.4908223907812191	0
Founder	Paraquat	400 µg/mL	1	12	7.612993373163308	0.4908223907812191	4.337293118539985
Founder	Paraquat	400 µg/mL	2	12	6.485040944143068	0.950245007341309	9.11973005615874
Founder	Paraquat	400 µg/mL	3	12	6.474966869141437	1.2363808839530266	13.996498402079743
Founder	Paraquat	400 µg/mL	4	12	4.826165814486273	1.1912750196705284	19.156181649529323
Founder	Paraquat	400 µg/mL	5	12	3.3241370763020375	0.6473414070862634	24.914190117560874
Founder	Paraquat	400 µg/mL	6	12	2.957073024741982	0.7593731964299066	30.995490726797907
Founder	Paraquat	400 µg/mL	7	12	2.7958443646902764	0.41316493084434386	37.046643250537755
Founder	Paraquat	400 µg/mL	8	12	2.7184963531719357	0.3267805584841082	43.27294633009408
Founder	Paraquat	400 µg/mL	9	12	2.608592641261062	0.2999253734049962	49.5121839248967
Founder	Paraquat	400 µg/mL	10	12	2.5232038280415074	0.21553872590444656	55.90583887942525
Founder	Paraquat	400 µg/mL	11	12	2.4951365128721052	0.298507053245668	62.18309071332942
Founder	Paraquat	400 µg/mL	12	12	2.61866475920306	0.20495936030911474	68.60971252022398
