# Supplementary material for: Genetically controlled mtDNA deletions prevent ROS damage by arresting oxidative phosphorylation
Source: eLife. 2022 Jul 8;11:e76095. doi: 10.7554/eLife.76095 (PMC9427111; doi:10.7554/eLife.76095)
Supplement: Figure 4—source data 2. — Data are shown in Figure 4C. [file elife-76095-fig4-data2.xlsx]

## Sheet: Data S28 - Double mutant curves
README:Log corrected cells : adjusted in y-axis to match initial value for curve comparison and retain shape in log2 scale.
Log corrected cells = 2^ (log2(Cellsk;t=n) / log2(Cellsk;t=0) /log2(median(Cellst=0))
Strain	Concentration Paraquat	Time (h)	N	#cells	#cells S.D	Log corrected cells
sod2∆mip1∆	50 µg/mL	0.007211312717861111	384	11382.361964460944	8223.067509958353	14999.999999999993
sod2∆mip1∆	50 µg/mL	0.33930933634444443	384	11399.83737501122	8248.88302239603	15023.71063867036
sod2∆mip1∆	50 µg/mL	0.6725926360805555	384	11454.217375763781	8319.157841859122	15097.500292971255
sod2∆mip1∆	50 µg/mL	1.0061241674416668	384	11567.91498393528	8429.096369420644	15251.81296466224
sod2∆mip1∆	50 µg/mL	1.339634774725	384	11720.60479169132	8570.245114269599	15459.117073437146
sod2∆mip1∆	50 µg/mL	1.6727697205555556	384	11923.073001291486	8735.13770743006	15734.127318482919
sod2∆mip1∆	50 µg/mL	2.0061583207722222	384	12165.352318081426	8914.284778277699	16063.393757516485
sod2∆mip1∆	50 µg/mL	2.339517625502778	384	12418.700846285545	9102.706410545388	16407.910924765252
sod2∆mip1∆	50 µg/mL	2.6712641661027776	384	12684.596763702786	9300.654844045503	16769.714093641905
sod2∆mip1∆	50 µg/mL	3.005002875527778	384	12948.23852449642	9496.550180625936	17128.67140549419
sod2∆mip1∆	50 µg/mL	3.338550928027778	384	13218.607562202862	9700.109526106247	17497.01248804771
sod2∆mip1∆	50 µg/mL	3.672424407722222	384	13490.629250589674	9898.511379087024	17867.829824676846
sod2∆mip1∆	50 µg/mL	4.005260381888889	384	13791.715494013646	10124.30909695638	18278.525211852546
sod2∆mip1∆	50 µg/mL	4.338371865222222	384	14137.611491903222	10392.516293930272	18750.669955740723
sod2∆mip1∆	50 µg/mL	4.673507818055556	384	14535.601966887152	10709.042561835056	19294.345190699234
sod2∆mip1∆	50 µg/mL	5.006539732999999	384	15008.519562390195	11072.415723278296	19940.945931951515
sod2∆mip1∆	50 µg/mL	5.340204106638889	384	15561.00516204672	11501.503808592435	20697.09843125619
sod2∆mip1∆	50 µg/mL	5.6720175205277785	384	16205.822745673404	11990.555441837221	21580.622039890855
sod2∆mip1∆	50 µg/mL	6.005043127194445	384	16938.86765458992	12535.17997228379	22586.294602178583
sod2∆mip1∆	50 µg/mL	6.338054738055556	384	17783.767908519298	13132.277729356754	23747.016304326953
sod2∆mip1∆	50 µg/mL	6.673241678277778	384	18737.827179831846	13812.352209875195	25059.657583149055
sod2∆mip1∆	50 µg/mL	7.006892889416666	384	19807.357456683167	14574.409830703442	26533.515638050027
sod2∆mip1∆	50 µg/mL	7.339171786916666	384	20953.71743073712	15388.273825161712	28115.85951351329
sod2∆mip1∆	50 µg/mL	7.672895339999999	384	22195.92885658	16252.036507419676	29833.396505348992
sod2∆mip1∆	50 µg/mL	8.006345661944444	384	23500.803745308953	17143.303035552864	31640.635100830834
sod2∆mip1∆	50 µg/mL	8.339159586638889	384	24899.65039408466	18087.32856269227	33581.3170311269
sod2∆mip1∆	50 µg/mL	8.672303390833333	384	26356.906758252524	19051.572952986826	35606.46168482766
sod2∆mip1∆	50 µg/mL	9.006286178833333	384	27912.056671643313	20066.829928817333	37771.29871312164
sod2∆mip1∆	50 µg/mL	9.339065111611111	384	29531.883714509884	21120.676447095666	40029.9609901122
sod2∆mip1∆	50 µg/mL	9.671935889972222	384	31190.31479898789	22176.69071924881	42346.248256410625
sod2∆mip1∆	50 µg/mL	10.005851789722223	384	32922.26658862188	23286.669596542462	44769.10681535061
sod2∆mip1∆	50 µg/mL	10.338431011111112	384	34712.75461192766	24422.028770203255	47277.81487769425
sod2∆mip1∆	50 µg/mL	10.671724866361112	384	36530.864944017325	25576.720351663185	49829.1417260686
sod2∆mip1∆	50 µg/mL	11.005828417472223	384	38383.21252166983	26723.24375194313	52432.375198611044
sod2∆mip1∆	50 µg/mL	11.338496445222223	384	40370.71970125696	28010.052737232632	55229.6863178783
sod2∆mip1∆	50 µg/mL	11.672082818027777	384	42371.80863522007	29271.844422072452	58050.228439099075
sod2∆mip1∆	50 µg/mL	12.006048653055556	384	44422.94416962669	30565.189043303682	60945.39927189146
sod2∆mip1∆	50 µg/mL	12.338931124416668	384	46596.187599559154	31945.787652186606	64017.23552962325
sod2∆mip1∆	50 µg/mL	12.672341757472223	384	48798.75332029198	33323.42387450449	67134.84152814787
sod2∆mip1∆	50 µg/mL	13.00548637	384	51108.9250021893	34775.309314709455	70409.2266928814
sod2∆mip1∆	50 µg/mL	13.339049655	384	53427.317948376185	36185.0508987877	73699.66551179774
sod2∆mip1∆	50 µg/mL	13.672010526916667	384	55894.55465361116	37737.70526095285	77205.9891394311
sod2∆mip1∆	50 µg/mL	14.005187902444444	384	58410.33167796255	39298.40363571976	80786.0085946934
sod2∆mip1∆	50 µg/mL	14.338723062472221	384	60973.84638198974	40877.37473760833	84438.65010989529
sod2∆mip1∆	50 µg/mL	14.672866679166667	384	63587.140851621974	42482.07002514519	88166.89456247902
sod2∆mip1∆	50 µg/mL	15.005791081055554	384	66353.4614381666	44218.97961188262	92118.38669494659
sod2∆mip1∆	50 µg/mL	15.339186669388889	384	69123.09955025006	45928.210928516	96079.4987235771
sod2∆mip1∆	50 µg/mL	15.673175869722222	384	71909.28567834929	47573.37248168634	100069.01329453236
sod2∆mip1∆	50 µg/mL	16.00591863858333	384	74945.5189061013	49458.57172968941	104421.76748706117
sod2∆mip1∆	50 µg/mL	16.33928755052778	384	77855.52658471701	51174.874627619865	108598.46149330687
sod2∆mip1∆	50 µg/mL	16.671890118055558	384	80925.75446078814	53026.60408437197	113010.11897088286
sod2∆mip1∆	50 µg/mL	17.004934186666667	384	84067.20395705858	54903.12937183891	117529.23772066282
sod2∆mip1∆	50 µg/mL	17.339230386083333	384	87215.02334299119	56757.56147185318	122062.52887532739
sod2∆mip1∆	50 µg/mL	17.672209991611112	384	90424.68290002257	58622.75628329194	126689.8591639285
sod2∆mip1∆	50 µg/mL	18.00518448272222	384	93703.72348481603	60502.92795805509	131422.22969476908
sod2∆mip1∆	50 µg/mL	18.339334049416667	384	97056.34598048116	62404.133579566165	136265.85674462837
sod2∆mip1∆	50 µg/mL	18.67207516386111	384	100459.00651951374	64320.034920269245	141186.83313017763
sod2∆mip1∆	50 µg/mL	19.005210323333333	384	104041.54738600185	66401.27652686858	146373.27834711966
sod2∆mip1∆	50 µg/mL	19.33920463025	384	107409.13273490257	68256.51912966075	151253.35068974015
sod2∆mip1∆	50 µg/mL	19.67275089216667	384	111144.00473075344	70429.03166893945	156670.9547661412
sod2∆mip1∆	50 µg/mL	20.006137711333334	384	114596.83907200744	72331.11686842647	161684.24287275207
sod2∆mip1∆	50 µg/mL	20.33928404411111	384	118337.865447097	74444.45939042633	167121.00363536694
sod2∆mip1∆	50 µg/mL	20.67259988361111	384	122003.59038135946	76452.9874251317	172453.2608032867
sod2∆mip1∆	50 µg/mL	21.005204095249997	384	126086.76265797904	78786.69545008996	178398.31834311056
sod2∆mip1∆	50 µg/mL	21.340180545527776	384	129996.41631678137	80923.4448549386	184096.07178493383
sod2∆mip1∆	50 µg/mL	21.673431935777778	384	134012.8312796218	83100.21344964077	189954.68897573033
sod2∆mip1∆	50 µg/mL	22.00527919052778	384	138124.41576342646	85344.57903160324	195957.5031681961
sod2∆mip1∆	50 µg/mL	22.340165954694445	384	142437.03159763452	87751.87213245734	202259.49261736125
sod2∆mip1∆	50 µg/mL	22.673961028055555	384	146543.24113182534	89994.21815659394	208265.10773609983
sod2∆mip1∆	50 µg/mL	23.00709649080556	384	150891.6964927753	92395.10084257269	214630.4454464088
sod2∆mip1∆	50 µg/mL	23.34059206855556	384	155440.42462585674	94945.13843793367	221294.74712119764
sod2∆mip1∆	50 µg/mL	23.67312280938889	384	159373.98015874834	97017.83372050725	227062.4197551861
sod2∆mip1∆	50 µg/mL	24.00611970888889	384	163863.46481507752	99431.19446984187	233650.3740243837
sod2∆mip1∆	50 µg/mL	24.338875996083335	384	168243.39238194545	101691.3479038035	240082.7058294026
sod2∆mip1∆	50 µg/mL	24.672181804444445	384	172984.7334650448	104204.96838562939	247051.38347637194
sod2∆mip1∆	50 µg/mL	25.00726441497222	384	177555.51005846175	106557.13636564642	253774.7183252937
sod2∆mip1∆	50 µg/mL	25.340091084694443	384	182897.79372063166	109403.46411530633	261639.36947161405
sod2∆mip1∆	50 µg/mL	25.671951346055554	384	187504.29141391843	111742.28972638585	268426.29236559116
sod2∆mip1∆	50 µg/mL	26.007106524444445	384	192791.5989214259	114554.55616494463	276222.34626803343
sod2∆mip1∆	50 µg/mL	26.34044331497222	384	197152.40345736628	116704.72221847424	282657.049775592
sod2∆mip1∆	50 µg/mL	26.673356774972223	384	202520.88955572536	119500.79209714291	290584.4338646616
sod2∆mip1∆	50 µg/mL	27.006286836055555	384	207808.6252142057	122182.62219175059	298398.65167062695
sod2∆mip1∆	50 µg/mL	27.33881974552778	384	213496.95678503704	125092.26620482536	306811.42935769155
sod2∆mip1∆	50 µg/mL	27.671921888	384	218581.62668709425	127534.46653014047	314337.0338040557
sod2∆mip1∆	50 µg/mL	28.005703889444444	384	224574.07807695612	130601.19371685329	323212.84192536806
sod2∆mip1∆	50 µg/mL	28.340434442777777	384	229659.51053800454	132988.776132857	330750.7050971618
sod2∆mip1∆	50 µg/mL	28.673355233333332	384	235054.5103455872	135570.81050338634	338752.8148569924
sod2∆mip1∆	50 µg/mL	29.005304043611112	384	240181.80055391227	137922.953037658	346362.8794133659
sod2∆mip1∆	50 µg/mL	29.33910094638889	384	246267.30570386339	140922.99628645089	355401.3773198035
sod2∆mip1∆	50 µg/mL	29.672880767222225	384	251796.20441551984	143352.7516272001	363618.9041638152
sod2∆mip1∆	50 µg/mL	30.006792917777776	384	257995.90060963872	146254.61167062906	372839.7667548045
sod2∆mip1∆	50 µg/mL	30.339687291111108	384	263992.09425179084	148921.7550540289	381764.1912513229
sod2∆mip1∆	50 µg/mL	30.672898042777778	384	269934.71091251855	151556.54926292505	390614.7871671783
sod2∆mip1∆	50 µg/mL	31.006589506944447	384	275953.55727876344	154121.0781705939	399584.7859477723
sod2∆mip1∆	50 µg/mL	31.339967987500003	384	281878.01983497763	156733.53259686523	408419.7715708433
sod2∆mip1∆	50 µg/mL	31.67352263388889	384	287815.6560009406	159307.45390049025	417279.9100481543
sod2∆mip1∆	50 µg/mL	32.00708984027778	384	293872.33087624906	161945.39755049694	426323.24406183016
sod2∆mip1∆	50 µg/mL	32.33909816388889	384	300498.8648599382	164870.83305876094	436223.7528816163
sod2∆mip1∆	50 µg/mL	32.67220799888889	384	305974.1354992859	167117.40437760606	444409.068526936
sod2∆mip1∆	50 µg/mL	33.00732626888889	384	312455.0203910115	169934.70102239834	454103.327628678
sod2∆mip1∆	50 µg/mL	33.33973892277778	384	318598.8960479839	172518.16270183836	463298.9706577472
sod2∆mip1∆	50 µg/mL	33.67263500972222	384	324073.3134726404	174714.46029539112	471497.04330320464
sod2∆mip1∆	50 µg/mL	34.00607517416667	384	329939.1408660128	177143.9372732586	480285.80294464494
sod2∆mip1∆	50 µg/mL	34.33906076472222	384	336048.2994481033	179645.4821538839	489444.05407442123
sod2∆mip1∆	50 µg/mL	34.67198718833333	384	342191.62090582534	182142.73153601546	498658.4813306849
sod2∆mip1∆	50 µg/mL	35.00538529638889	384	347735.78173986444	184323.49053700626	506978.4218005935
sod2∆mip1∆	50 µg/mL	35.33943496	384	354413.6382168283	187131.33562129023	517004.8621137132
sod2∆mip1∆	50 µg/mL	35.673114057777774	384	360319.22844035545	189461.6409144914	525876.4425922023
sod2∆mip1∆	50 µg/mL	36.00617555833333	384	366714.13776460045	192129.6175625958	535487.9396527385
sod2∆mip1∆	50 µg/mL	36.338771694722226	384	372034.99656145927	194206.97125913622	543488.9270022514
sod2∆mip1∆	50 µg/mL	36.67213555	384	378213.1171867273	196873.74034370965	552783.2211891849
sod2∆mip1∆	50 µg/mL	37.00565744805556	384	383239.64857778104	198821.48203290396	560348.3916980146
sod2∆mip1∆	50 µg/mL	37.33885795055556	384	389283.27027813887	201403.29366240816	569448.2113279366
sod2∆mip1∆	50 µg/mL	37.674310266388886	384	394592.58680891606	203505.7254224996	577445.8427212224
sod2∆mip1∆	50 µg/mL	38.006089923333334	384	401012.9024919551	206153.03436392933	587121.2602603124
sod2∆mip1∆	50 µg/mL	38.33908726916667	384	407046.77558909677	208503.39086428942	596218.4835490405
sod2∆mip1∆	50 µg/mL	38.67248072527777	384	413363.90232934116	211223.0357075932	605747.0360747661
sod2∆mip1∆	50 µg/mL	39.005887073055554	384	418893.5867828568	213518.53275309654	614091.3706446118
sod2∆mip1∆	50 µg/mL	39.34060169805556	384	424422.2353299025	215799.1509467277	622437.3967251217
sod2∆mip1∆	50 µg/mL	39.6734668725	384	429874.9458537415	218184.82289931152	630671.9345896477
sod2∆mip1∆	50 µg/mL	40.006986446111114	384	435293.57835643954	220613.65748832983	638858.0670275881
sod2∆mip1∆	50 µg/mL	40.339780983611114	384	440367.1551450325	222709.80699990367	646525.6416949318
sod2∆mip1∆	50 µg/mL	40.67259883972222	384	445716.3705880014	225047.03426302897	654612.6093745969
sod2∆mip1∆	50 µg/mL	41.00578382333333	384	450998.1670598137	227398.38253450496	662600.4673693986
sod2∆mip1∆	50 µg/mL	41.34051669944445	384	455451.8055017566	229488.30473378982	669338.0208823485
sod2∆mip1∆	50 µg/mL	41.67344762194444	384	459947.89475144655	231337.17575178982	676141.7698117008
sod2∆mip1∆	50 µg/mL	42.00647827638889	384	465505.7950179343	233854.24195549937	684555.0288284674
sod2∆mip1∆	50 µg/mL	42.339870622777774	384	470850.85607678554	236150.63740053592	692648.9038476835
sod2∆mip1∆	50 µg/mL	42.672685449999996	384	476200.77023213974	238667.2218626926	700752.8469979285
sod2∆mip1∆	50 µg/mL	43.00592886055556	384	481191.60718997533	240786.112054607	708315.2937257283
sod2∆mip1∆	50 µg/mL	43.34013195861111	384	485919.09713892534	243308.23087311714	715480.8378857013
sod2∆mip1∆	50 µg/mL	43.673320825	384	489876.30449295184	245250.015346835	721480.4353524852
sod2∆mip1∆	50 µg/mL	44.006757336944446	384	493858.1758444254	247487.59685889597	727518.8720517887
sod2∆mip1∆	50 µg/mL	44.34083611472222	384	498135.8052890561	249533.84456405338	734007.4234201199
sod2∆mip1∆	50 µg/mL	44.67358670722222	384	503356.5474503451	252158.17162269147	741928.7716685354
sod2∆mip1∆	50 µg/mL	45.00676466555555	384	508179.7768331823	254388.46561283935	749249.1385840938
sod2∆mip1∆	50 µg/mL	45.339517172777775	384	512648.38774233166	256883.86466453466	756033.1227703763
sod2∆mip1∆	50 µg/mL	45.672822647222226	384	516793.2145192827	258827.7531322654	762327.1193724341
sod2∆mip1∆	50 µg/mL	46.006888707777776	384	521473.81363238045	261383.0064159923	769436.4891910114
sod2∆mip1∆	50 µg/mL	46.339579191944445	384	525241.6733304748	263252.9060901086	775160.8684521096
sod2∆mip1∆	50 µg/mL	46.672859978055556	384	530012.455842517	265850.201554921	782410.6937614167
sod2∆mip1∆	50 µg/mL	47.006505544166664	384	534683.2152578587	268102.8683690682	789510.3894343426
sod2∆mip1∆	50 µg/mL	47.33998983361111	384	539373.274760416	270733.67753677396	796641.2660819327
sod2∆mip1∆	50 µg/mL	47.673561754999994	384	543355.4936969192	273008.79202971177	802697.3644197701
sod2∆mip1∆	50 µg/mL	48.00674417305556	384	547270.5399000637	275308.91448085144	808652.5862222689
sod2∆mip1∆	50 µg/mL	48.3391923875	384	551232.3826643148	277552.488443377	814680.2724514689
sod2∆mip1∆	50 µg/mL	48.672650059722216	384	555395.7941651491	280133.510482665	821016.0119081163
sod2∆mip1∆	50 µg/mL	49.00767717694444	384	559050.4516329928	282311.7288911689	826578.703754022
sod2∆mip1∆	50 µg/mL	49.34111984138889	384	562372.0275056355	284179.4811149688	831635.3501719971
sod2∆mip1∆	50 µg/mL	49.67288874	384	566180.9531908087	286811.1210869657	837435.0062961286
sod2∆mip1∆	50 µg/mL	50.00571684388889	384	569335.6811131574	288765.1709066986	842239.4222931225
sod2∆mip1∆	50 µg/mL	50.34117219638889	384	573024.6592260374	291166.04527070036	847858.459138561
sod2∆mip1∆	50 µg/mL	50.67421322416667	384	576887.5422691798	293603.2424474373	853743.5329748363
sod2∆mip1∆	50 µg/mL	51.007413496944444	384	580719.1833699382	296092.62051956524	859582.1604428968
sod2∆mip1∆	50 µg/mL	51.340875155	384	584184.9842706913	298336.57971803437	864864.3040255342
sod2∆mip1∆	50 µg/mL	51.67270957694445	384	587454.7993727399	300628.5152576351	869848.5994836028
sod2∆mip1∆	50 µg/mL	52.007701945	384	590225.7555611106	302579.68341071496	874073.1085084103
sod2∆mip1∆	50 µg/mL	52.340902682777774	384	592905.8138521758	304602.82852672786	878159.5951741729
sod2∆mip1∆	50 µg/mL	52.67446248555556	384	596106.0685029685	307161.55404476845	883039.9792714742
sod2∆mip1∆	50 µg/mL	53.007510422222225	384	599230.1516411093	309091.77814534545	887804.948800735
sod2∆mip1∆	50 µg/mL	53.340452479166665	384	602661.7133553706	311668.96580458205	893039.7421861067
sod2∆mip1∆	50 µg/mL	53.67408596972222	384	605836.9288659354	313965.2902163366	897884.2681889097
sod2∆mip1∆	50 µg/mL	54.007559986388884	384	608929.3145210473	316247.8561438065	902603.1393364754
sod2∆mip1∆	50 µg/mL	54.34089492777778	384	611815.5534834834	318499.2340835167	907008.0769353886
sod2∆mip1∆	50 µg/mL	54.67272772555555	384	614667.2389782639	320783.89664522995	911360.8826300547
sod2∆mip1∆	50 µg/mL	55.006480788055555	384	617386.1717504972	322867.3470111735	915511.6106839564
sod2∆mip1∆	50 µg/mL	55.33972919722222	384	620021.0271521289	325217.2114954937	919534.5014706494
sod2∆mip1∆	50 µg/mL	55.67279547111111	384	622678.8043145797	327432.81094764033	923592.900952545
sod2∆mip1∆	50 µg/mL	56.00700773638889	384	624882.6413301261	329029.01427639363	926958.5266243158
sod2∆mip1∆	50 µg/mL	56.34018845527778	384	627404.0217033824	331338.17219683377	930809.5239658448
sod2∆mip1∆	50 µg/mL	56.6737129475	384	629737.5645699973	333530.98630193475	934374.0376895352
sod2∆mip1∆	50 µg/mL	57.007577930277776	384	632213.0858163575	335563.848683319	938155.8516717536
sod2∆mip1∆	50 µg/mL	57.34068150833333	384	634326.3997946738	337606.37269606686	941384.6737440486
sod2∆mip1∆	50 µg/mL	57.673866357777776	384	636293.9358553935	339768.52077449585	944391.0551156283
sod2∆mip1∆	50 µg/mL	58.00712310694444	384	638449.5569835627	341485.72408431757	947685.1444856777
sod2∆mip1∆	50 µg/mL	58.34018183277777	384	641201.0702592081	343805.25701110205	951890.3174258528
sod2∆mip1∆	50 µg/mL	58.673498969166666	384	643723.1597394457	346182.006490014	955745.327514933
sod2∆mip1∆	50 µg/mL	59.00749386166667	384	646618.3131841173	348469.45581786905	960171.1154753071
sod2∆mip1∆	50 µg/mL	59.34002307888889	384	649286.9339614568	350567.7827523403	964251.1242471237
sod2∆mip1∆	50 µg/mL	59.6734037225	384	651528.8054477341	353168.3265277773	967679.0664079166
sod2∆mip1∆	50 µg/mL	60.00668166888889	384	652939.2238645199	354811.4360132794	969835.8507751953
sod2∆mip1∆	50 µg/mL	60.340185895	384	654889.4184250686	356307.6825274855	972818.277030659
sod2∆mip1∆	50 µg/mL	60.67419285555555	384	656834.9680816386	358674.5121318013	975793.861363254
sod2∆mip1∆	50 µg/mL	61.006843659999994	384	659441.9873137339	361164.1439442272	979781.5260953377
sod2∆mip1∆	50 µg/mL	61.34035626277778	384	661294.8102466905	363101.17791785015	982615.8646983033
sod2∆mip1∆	50 µg/mL	61.6739266875	384	663888.4356315548	365455.82797415816	986583.8329670008
sod2∆mip1∆	50 µg/mL	62.007949466944446	384	666153.1945057352	368048.1621937372	990049.0455042052
sod2∆mip1∆	50 µg/mL	62.341491855	384	668679.2684763174	370188.16263553797	993914.4959609441
sod2∆mip1∆	50 µg/mL	62.67276071333334	384	670742.7548684188	372240.15703684004	997072.4056641144
sod2∆mip1∆	50 µg/mL	63.00712003555555	384	673413.882809954	374448.76050015655	1001160.661527102
sod2∆mip1∆	50 µg/mL	63.34014973861111	384	675347.0575596695	376582.85936943226	1004119.752924729
sod2∆mip1∆	50 µg/mL	63.67337021777777	384	677600.6002180061	378716.0062073218	1007569.5442140142
sod2∆mip1∆	50 µg/mL	64.00607752527777	384	679392.5045304735	380767.4869581644	1010312.8875853892
sod2∆mip1∆	50 µg/mL	64.34151589	384	681288.148953371	383291.0003904982	1013215.2861989491
sod2∆mip1∆	50 µg/mL	64.67424909722223	384	682690.2361634827	385399.3668940124	1015362.1588051433
sod2∆mip1∆	50 µg/mL	65.00776657055556	384	684536.3708189093	387302.1201168309	1018189.154485925
sod2∆mip1∆	50 µg/mL	65.34115266472223	384	686084.2385528642	389692.6315263684	1020559.5861285528
sod2∆mip1∆	50 µg/mL	65.67463074055556	384	687733.1170469822	391825.7746414739	1023084.8812408268
sod2∆mip1∆	50 µg/mL	66.00653553805556	384	689578.6501708754	393467.16888763814	1025911.5695888903
sod2∆mip1∆	50 µg/mL	66.33941100666667	384	691736.4752930448	395686.4771604011	1029216.8596305755
sod2∆mip1∆	50 µg/mL	66.67281824583333	384	693909.819372466	397897.75339750777	1032546.2291119251
sod2∆mip1∆	50 µg/mL	67.00665721777779	384	695998.194184126	399611.38580621645	1035745.7235673473
sod2∆mip1∆	50 µg/mL	67.3412205238889	384	698042.1356297021	401532.4421675821	1038877.4185970497
sod2∆mip1∆	50 µg/mL	67.67457797777777	384	699585.2071607361	403374.8203134941	1041241.8681485244
sod2∆mip1∆	50 µg/mL	68.00802207694444	384	700604.2945841984	405111.3785335757	1042803.5010169806
sod2∆mip1∆	50 µg/mL	68.34138033166667	384	701216.0162587415	406893.21235797467	1043740.9255319204
sod2∆mip1∆	50 µg/mL	68.673654345	384	701993.8225959482	408689.0497357896	1044932.8991116411
sod2∆mip1∆	50 µg/mL	69.00720502222222	384	702645.8368674694	410506.22224451177	1045932.1287882603
sod2∆mip1∆	50 µg/mL	69.3411532675	384	703650.1005106102	412560.20916938403	1047471.2438389759
sod2∆mip1∆	50 µg/mL	69.67410458277777	384	704735.9481563064	413998.1579909104	1049135.4659876362
sod2∆mip1∆	50 µg/mL	70.00764999805556	384	705714.306135522	415313.6936525788	1050635.0092168958
sod2∆mip1∆	50 µg/mL	70.34133991888889	384	707448.7786700231	416839.6857446316	1053293.6109475761
sod2∆mip1∆	50 µg/mL	70.67281079916667	384	710435.2898518931	419053.42382377427	1057871.7902265296
sod2∆mip1∆	50 µg/mL	71.0062098375	384	713127.0597348685	420939.8204926755	1061998.632518558
sod2∆mip1∆	50 µg/mL	71.3396054436111	384	715902.736749206	422857.5286229224	1066254.5976861115
sod2∆mip1∆	50 µg/mL	71.67325047416666	384	717043.1610454784	423466.70646420936	1068003.3597488997
sod2∆	50 µg/mL	0.007211312717861111	96	15130.24129957602	3485.620760411069	14999.999999999993
sod2∆	50 µg/mL	0.33930933634444443	96	15112.825728843438	3486.5005539686085	14982.749842866839
sod2∆	50 µg/mL	0.6725926360805555	96	15037.484818943549	3500.8784926601525	14908.12431715454
sod2∆	50 µg/mL	1.0061241674416668	96	14972.488130914078	3516.9555211037077	14843.74452208354
sod2∆	50 µg/mL	1.339634774725	96	14904.452726687814	3527.554218362863	14776.354582767206
sod2∆	50 µg/mL	1.6727697205555556	96	14881.738782496328	3521.739475523061	14753.856068651347
sod2∆	50 µg/mL	2.0061583207722222	96	14886.692879354814	3518.719821142711	14758.763181078284
sod2∆	50 µg/mL	2.339517625502778	96	14908.621744899841	3513.657799117669	14780.484056639598
sod2∆	50 µg/mL	2.6712641661027776	96	14939.158273140369	3514.785750632461	14810.730905500921
sod2∆	50 µg/mL	3.005002875527778	96	14968.954266183242	3519.4650799343867	14840.244190587664
sod2∆	50 µg/mL	3.338550928027778	96	15002.46137588039	3527.8441910497972	14873.43331777582
sod2∆	50 µg/mL	3.672424407722222	96	15038.2791434666	3537.7396484894825	14908.911101080519
sod2∆	50 µg/mL	4.005260381888889	96	15084.721819841212	3551.5061512290795	14954.912827947092
sod2∆	50 µg/mL	4.338371865222222	96	15148.713303143613	3570.175120411478	15018.296536447402
sod2∆	50 µg/mL	4.673507818055556	96	15222.153471928754	3596.922391705735	15091.038892888208
sod2∆	50 µg/mL	5.006539732999999	96	15314.971053712978	3635.2620147493744	15182.974091612872
sod2∆	50 µg/mL	5.340204106638889	96	15422.500022029753	3677.4508884520997	15289.480195484677
sod2∆	50 µg/mL	5.6720175205277785	96	15548.571598277067	3731.8756895635393	15414.35167241364
sod2∆	50 µg/mL	6.005043127194445	96	15690.940355073719	3785.851066656357	15555.364100872737
sod2∆	50 µg/mL	6.338054738055556	96	15870.992008074129	3853.575624165223	15733.698781022344
sod2∆	50 µg/mL	6.673241678277778	96	16084.513999319619	3927.429020012075	15945.182272363792
sod2∆	50 µg/mL	7.006892889416666	96	16323.920694467419	4010.982516753554	16182.300348286251
sod2∆	50 µg/mL	7.339171786916666	96	16564.896225362354	4091.382288261002	16420.96910806267
sod2∆	50 µg/mL	7.672895339999999	96	16834.3838103093	4186.539471550152	16687.873294254532
sod2∆	50 µg/mL	8.006345661944444	96	17140.82455717622	4272.39849846556	16991.371736680256
sod2∆	50 µg/mL	8.339159586638889	96	17470.77451259328	4366.836063490569	17318.14821609156
sod2∆	50 µg/mL	8.672303390833333	96	17820.33092938381	4463.946045660501	17664.336535357405
sod2∆	50 µg/mL	9.006286178833333	96	18232.95691541017	4579.137178579785	18072.97888541143
sod2∆	50 µg/mL	9.339065111611111	96	18668.026824167922	4692.646496985048	18503.83948258896
sod2∆	50 µg/mL	9.671935889972222	96	19132.623631407827	4808.95344541839	18963.931350336705
sod2∆	50 µg/mL	10.005851789722223	96	19624.206713160147	4929.609106320932	19450.73689861371
sod2∆	50 µg/mL	10.338431011111112	96	20153.09901427166	5061.064980928836	19974.47684446653
sod2∆	50 µg/mL	10.671724866361112	96	20682.532155876193	5195.100094686168	20498.73999544752
sod2∆	50 µg/mL	11.005828417472223	96	21268.797069319735	5340.562666420254	21079.265893933614
sod2∆	50 µg/mL	11.338496445222223	96	21864.012608428944	5504.4150991585575	21668.640094955474
sod2∆	50 µg/mL	11.672082818027777	96	22481.921512332967	5670.5907440708625	22280.469708502376
sod2∆	50 µg/mL	12.006048653055556	96	23143.490778637926	5839.956796991064	22935.513397431158
sod2∆	50 µg/mL	12.338931124416668	96	23843.915335138277	6020.665757355303	23629.010793611382
sod2∆	50 µg/mL	12.672341757472223	96	24592.309540746694	6213.611972867257	24369.983210473627
sod2∆	50 µg/mL	13.00548637	96	25369.29378674291	6414.799090475832	25139.24071622631
sod2∆	50 µg/mL	13.339049655	96	26221.383585384123	6623.12538017406	25982.832575199503
sod2∆	50 µg/mL	13.672010526916667	96	27070.629007979634	6849.798821830043	26823.583919217395
sod2∆	50 µg/mL	14.005187902444444	96	27948.934186048104	7084.711492442498	27693.079448490847
sod2∆	50 µg/mL	14.338723062472221	96	28865.06222311286	7321.29064421685	28599.992318006472
sod2∆	50 µg/mL	14.672866679166667	96	29791.17969651391	7565.6060367252885	29516.76786097937
sod2∆	50 µg/mL	15.005791081055554	96	30751.252059470015	7837.569026688937	30467.128764588535
sod2∆	50 µg/mL	15.339186669388889	96	31746.39927316827	8111.103023060273	31452.181600717773
sod2∆	50 µg/mL	15.673175869722222	96	32884.9229743337	8380.52533497743	32579.12259663533
sod2∆	50 µg/mL	16.00591863858333	96	33999.30622233315	8679.766801640437	33682.134776371844
sod2∆	50 µg/mL	16.33928755052778	96	35216.04682800312	8985.529408388124	34886.42281268604
sod2∆	50 µg/mL	16.671890118055558	96	36412.78474259948	9296.376495593577	36070.87640010948
sod2∆	50 µg/mL	17.004934186666667	96	37669.804176265745	9620.968757178724	37314.955086439375
sod2∆	50 µg/mL	17.339230386083333	96	38960.66326351844	9963.406953995629	38592.48624920774
sod2∆	50 µg/mL	17.672209991611112	96	40278.05516867325	10310.254386630957	39896.23708314171
sod2∆	50 µg/mL	18.00518448272222	96	41676.69261803848	10662.153651196484	41280.350296517194
sod2∆	50 µg/mL	18.339334049416667	96	43108.57778745056	11032.615139660178	42697.32274720977
sod2∆	50 µg/mL	18.67207516386111	96	44582.65529782343	11423.086945703326	44156.003958671114
sod2∆	50 µg/mL	19.005210323333333	96	46029.34080268502	11824.631543093434	45587.537127552736
sod2∆	50 µg/mL	19.33920463025	96	47614.50799865227	12220.666717383367	47156.05518959204
sod2∆	50 µg/mL	19.67275089216667	96	49153.409517126245	12649.029134714317	48678.74861177703
sod2∆	50 µg/mL	20.006137711333334	96	50810.16347500034	13059.07377942657	50318.00538517503
sod2∆	50 µg/mL	20.33928404411111	96	52465.92055777686	13500.022966012448	51956.22783398291
sod2∆	50 µg/mL	20.67259988361111	96	54255.48224408875	13951.781083662197	53726.78569656386
sod2∆	50 µg/mL	21.005204095249997	96	56007.03840364208	14438.33248091549	55459.69080363356
sod2∆	50 µg/mL	21.340180545527776	96	57830.3873593076	14917.51104277717	57263.57253655361
sod2∆	50 µg/mL	21.673431935777778	96	59722.93499892714	15416.569716769649	59135.8601239021
sod2∆	50 µg/mL	22.00527919052778	96	61663.1878354822	15927.205309801859	61055.28689542654
sod2∆	50 µg/mL	22.340165954694445	96	63511.30507542894	16468.59629490344	62883.51654474199
sod2∆	50 µg/mL	22.673961028055555	96	65427.54918229348	16994.42119182696	64779.089496966386
sod2∆	50 µg/mL	23.00709649080556	96	67372.06181371298	17558.95802458889	66702.575054236
sod2∆	50 µg/mL	23.34059206855556	96	69283.51605324831	18111.50481236924	68593.31108045345
sod2∆	50 µg/mL	23.67312280938889	96	71256.78201396142	18580.882406614866	70545.13970707056
sod2∆	50 µg/mL	24.00611970888889	96	73360.94277695824	19123.77325280764	72626.3876466454
sod2∆	50 µg/mL	24.338875996083335	96	75526.55614642733	19667.314081109635	74768.3630320699
sod2∆	50 µg/mL	24.672181804444445	96	77768.79883689452	20259.418303617716	76986.07319831205
sod2∆	50 µg/mL	25.00726441497222	96	80061.37406217311	20860.574695869836	79253.50582848096
sod2∆	50 µg/mL	25.340091084694443	96	82363.2847855537	21551.287213823445	81530.11289019094
sod2∆	50 µg/mL	25.671951346055554	96	84616.94463816394	22158.946569736043	83758.9440902857
sod2∆	50 µg/mL	26.007106524444445	96	86886.44328652995	22818.36767691626	86003.38570112345
sod2∆	50 µg/mL	26.34044331497222	96	89032.44819719382	23367.254883573532	88125.64857325748
sod2∆	50 µg/mL	26.673356774972223	96	91332.7706466888	24039.267688183172	90400.4707124819
sod2∆	50 µg/mL	27.006286836055555	96	93704.74281364061	24724.92393212127	92746.0944078452
sod2∆	50 µg/mL	27.33881974552778	96	96121.99675062722	25443.381164200706	95136.44200368821
sod2∆	50 µg/mL	27.671921888	96	98526.66041157785	26125.832038026303	97514.2858828145
sod2∆	50 µg/mL	28.005703889444444	96	101018.98325512717	26902.042541830608	99978.75625721314
sod2∆	50 µg/mL	28.340434442777777	96	103456.37770000575	27597.07596129278	102388.85923563316
sod2∆	50 µg/mL	28.673355233333332	96	105894.2565045743	28298.785467084028	104799.39012674137
sod2∆	50 µg/mL	29.005304043611112	96	108326.40618333557	29008.638053434468	107204.20648283587
sod2∆	50 µg/mL	29.33910094638889	96	110910.39940504487	29817.039251232414	109759.10679697923
sod2∆	50 µg/mL	29.672880767222225	96	113605.6474074989	30607.68186295629	112423.95232934199
sod2∆	50 µg/mL	30.006792917777776	96	116296.1889320552	31428.797127190413	115084.08782594158
sod2∆	50 µg/mL	30.339687291111108	96	119078.09849011649	32274.321778104517	117834.50067949918
sod2∆	50 µg/mL	30.672898042777778	96	121785.18659517338	33094.43207574675	120510.88378016166
sod2∆	50 µg/mL	31.006589506944447	96	124645.32262994969	33936.99674075393	123338.52083596896
sod2∆	50 µg/mL	31.339967987500003	96	127335.05984015102	34755.982144645866	125997.64205907307
sod2∆	50 µg/mL	31.67352263388889	96	130099.74588064884	35595.637955745624	128730.80642943428
sod2∆	50 µg/mL	32.00708984027778	96	132920.00063104226	36465.12809604425	131518.85218949083
sod2∆	50 µg/mL	32.33909816388889	96	135951.49965553317	37408.7425981086	134515.6704585888
sod2∆	50 µg/mL	32.67220799888889	96	138559.85552038066	38227.10377366608	137094.1382870015
sod2∆	50 µg/mL	33.00732626888889	96	141558.39447038047	39187.28101193639	140058.26443458316
sod2∆	50 µg/mL	33.33973892277778	96	144493.21037565387	40142.11589779304	142959.34423058695
sod2∆	50 µg/mL	33.67263500972222	96	147173.61170220582	41007.59467796589	145608.88770286407
sod2∆	50 µg/mL	34.00607517416667	96	150029.59427922257	41957.420909099434	148431.94338291063
sod2∆	50 µg/mL	34.33906076472222	96	153076.72131669134	42989.317999270665	151443.88659332925
sod2∆	50 µg/mL	34.67198718833333	96	156175.44097949573	44008.51741672039	154506.77148373894
sod2∆	50 µg/mL	35.00538529638889	96	159026.14761982547	44936.62407582883	157324.46323062814
sod2∆	50 µg/mL	35.33943496	96	162443.54234542264	46038.54867283439	160702.2203481724
sod2∆	50 µg/mL	35.673114057777774	96	165593.74836123353	47043.226851439125	163815.83124533715
sod2∆	50 µg/mL	36.00617555833333	96	168960.99105584284	48110.61789134322	167143.89875442316
sod2∆	50 µg/mL	36.338771694722226	96	171900.2921786265	49098.96548909257	170048.95470607234
sod2∆	50 µg/mL	36.67213555	96	175276.10857768898	50256.30548838301	173385.38518023348
sod2∆	50 µg/mL	37.00565744805556	96	178110.5675071729	51210.37987202927	176186.72961914225
sod2∆	50 µg/mL	37.33885795055556	96	181549.00540155458	52363.78172121458	179584.9431463666
sod2∆	50 µg/mL	37.674310266388886	96	184630.43930852413	53402.71394708453	182630.27992200275
sod2∆	50 µg/mL	38.006089923333334	96	188415.90530743237	54582.808006056664	186371.33906332494
sod2∆	50 µg/mL	38.33908726916667	96	192051.26558055796	55693.99025739405	189963.98977893865
sod2∆	50 µg/mL	38.67248072527777	96	195943.7237354977	56945.49456360115	193810.65020190322
sod2∆	50 µg/mL	39.005887073055554	96	199439.66964733868	58031.886485414056	197265.40509933006
sod2∆	50 µg/mL	39.34060169805556	96	202943.4149609717	59138.482033722124	200727.81292140478
sod2∆	50 µg/mL	39.6734668725	96	206458.49859459794	60265.43514162496	204201.37133520504
sod2∆	50 µg/mL	40.006986446111114	96	210063.6158093105	61440.48152021485	207763.84454860745
sod2∆	50 µg/mL	40.339780983611114	96	213405.56119602636	62491.696200352984	211066.20985150253
sod2∆	50 µg/mL	40.67259883972222	96	217019.167232524	63615.889119712505	214636.96616001095
sod2∆	50 µg/mL	41.00578382333333	96	220583.8203892956	64718.36457462682	218159.29773294638
sod2∆	50 µg/mL	41.34051669944445	96	223754.9530714273	65837.66123825333	221292.73792763223
sod2∆	50 µg/mL	41.67344762194444	96	226865.84111526553	66771.09159348205	224366.61079432786
sod2∆	50 µg/mL	42.00647827638889	96	230839.6407407278	67957.88728847128	228293.07280846173
sod2∆	50 µg/mL	42.339870622777774	96	234698.9408551414	69130.60804479616	232106.3411504491
sod2∆	50 µg/mL	42.672685449999996	96	238721.09377938238	70347.21948678151	236080.45994830964
sod2∆	50 µg/mL	43.00592886055556	96	242374.32876260436	71383.64066764263	239690.01441447894
sod2∆	50 µg/mL	43.34013195861111	96	246029.82361613473	72662.04316416262	243301.75281313737
sod2∆	50 µg/mL	43.673320825	96	249011.58739922027	73662.84439308317	246247.7890064108
sod2∆	50 µg/mL	44.006757336944446	96	252105.65562376188	74790.71870217133	249304.75050939704
sod2∆	50 µg/mL	44.34083611472222	96	255282.07439061283	75792.70964828112	252443.03988124162
sod2∆	50 µg/mL	44.67358670722222	96	259373.91630684378	77004.76658854689	256485.7121240709
sod2∆	50 µg/mL	45.00676466555555	96	263066.2030631119	78064.66400575169	260133.58126993687
sod2∆	50 µg/mL	45.339517172777775	96	266643.4614807423	79314.20678349139	263667.7619777913
sod2∆	50 µg/mL	45.672822647222226	96	269916.2995660823	80203.55559981412	266901.15089098
sod2∆	50 µg/mL	46.006888707777776	96	273879.4269311066	81447.77669019191	270816.4615747959
sod2∆	50 µg/mL	46.339579191944445	96	276919.9980422024	82382.09584506723	273820.3124666478
sod2∆	50 µg/mL	46.672859978055556	96	280889.1460705991	83591.50519265642	277741.4815527652
sod2∆	50 µg/mL	47.006505544166664	96	284648.02465096384	84651.0375757496	281454.8770227037
sod2∆	50 µg/mL	47.33998983361111	96	288599.0354293147	85905.80366835081	285358.0323832749
sod2∆	50 µg/mL	47.673561754999994	96	291859.0855592568	86957.36966426123	288578.55997502926
sod2∆	50 µg/mL	48.00674417305556	96	295138.2787680502	88013.0621876602	291817.9659702582
sod2∆	50 µg/mL	48.3391923875	96	298445.5789366427	89031.47381076252	295085.1051503769
sod2∆	50 µg/mL	48.672650059722216	96	302072.50204069953	90220.50592245052	298667.948666101
sod2∆	50 µg/mL	49.00767717694444	96	305066.2106917107	91267.93327751213	301625.24432993925
sod2∆	50 µg/mL	49.34111984138889	96	307787.76148846594	92195.82752806107	304313.6698135574
sod2∆	50 µg/mL	49.67288874	96	311073.5895843535	93452.37534970601	307559.47606768436
sod2∆	50 µg/mL	50.00571684388889	96	313685.2262729915	94353.3913646654	310139.28067651176
sod2∆	50 µg/mL	50.34117219638889	96	316787.24769493326	95439.47956000965	313203.4678821659
sod2∆	50 µg/mL	50.67421322416667	96	320108.239906632	96595.81598093148	316483.9253045195
sod2∆	50 µg/mL	51.007413496944444	96	323384.62930457864	97748.84809351	319720.2943588223
sod2∆	50 µg/mL	51.340875155	96	326293.71159143373	98786.47282893867	322593.81817870686
sod2∆	50 µg/mL	51.67270957694445	96	329167.25325115415	99843.88236937468	325432.21320017293
sod2∆	50 µg/mL	52.007701945	96	331549.4780061017	100768.60757240055	327785.28379080683
sod2∆	50 µg/mL	52.340902682777774	96	333912.8874274722	101641.19377772725	330119.75430592895
sod2∆	50 µg/mL	52.67446248555556	96	336758.01277095365	102840.90053973817	332930.02266523335
sod2∆	50 µg/mL	53.007510422222225	96	339412.9856748101	103724.24448237699	335552.4489923947
sod2∆	50 µg/mL	53.340452479166665	96	342434.348962867	104959.12105919067	338536.75181748247
sod2∆	50 µg/mL	53.67408596972222	96	345245.43740487046	106023.69250613329	341313.33781222155
sod2∆	50 µg/mL	54.007559986388884	96	347889.6219066609	107064.47219391177	343925.04985711165
sod2∆	50 µg/mL	54.34089492777778	96	350401.763749607	108074.80356781438	346406.324300568
sod2∆	50 µg/mL	54.67272772555555	96	352896.7709690518	109116.32704356537	348870.6588420556
sod2∆	50 µg/mL	55.006480788055555	96	355313.9677182329	110123.61570190081	351258.12455875805
sod2∆	50 µg/mL	55.33972919722222	96	357708.982656575	111195.64989896552	353623.66690678895
sod2∆	50 µg/mL	55.67279547111111	96	360099.91532208474	112261.00992537834	355985.16302692855
sod2∆	50 µg/mL	56.00700773638889	96	362050.5949514463	113002.19720937268	357911.8159553472
sod2∆	50 µg/mL	56.34018845527778	96	364536.90503481025	114083.79072083089	360367.488418153
sod2∆	50 µg/mL	56.6737129475	96	366693.90351338306	115098.27502469966	362497.89503548795
sod2∆	50 µg/mL	57.007577930277776	96	368837.142809291	116022.99288095172	364614.7009464057
sod2∆	50 µg/mL	57.34068150833333	96	370772.70536381355	116984.99741623433	366526.3819754736
sod2∆	50 µg/mL	57.673866357777776	96	372491.9198395072	118018.92662521059	368224.3767714874
sod2∆	50 µg/mL	58.00712310694444	96	374354.9673108098	118863.31082031746	370064.4213346267
sod2∆	50 µg/mL	58.34018183277777	96	376754.4025458645	119943.0062555062	372434.21880859893
sod2∆	50 µg/mL	58.673498969166666	96	379125.93709790363	121129.32735437038	374776.44690618897
sod2∆	50 µg/mL	59.00749386166667	96	381730.4523258398	122213.72072436736	377348.7614392297
sod2∆	50 µg/mL	59.34002307888889	96	384302.4142908578	123179.39322684318	379888.9097074687
sod2∆	50 µg/mL	59.6734037225	96	386396.4963499395	124382.06405513427	381957.0778877305
sod2∆	50 µg/mL	60.00668166888889	96	387779.4440895924	125136.70994578952	383322.90638097434
sod2∆	50 µg/mL	60.340185895	96	389518.4227986125	125788.49953652704	385040.35239593225
sod2∆	50 µg/mL	60.67419285555555	96	391497.3854003782	126896.13439573726	386994.8023551
sod2∆	50 µg/mL	61.006843659999994	96	393765.2854608728	128071.96490904069	389234.59990688844
sod2∆	50 µg/mL	61.34035626277778	96	395562.32403458434	128998.9603189108	391009.3623836883
sod2∆	50 µg/mL	61.6739266875	96	397840.97501535935	130111.92353252706	393259.7567884959
sod2∆	50 µg/mL	62.007949466944446	96	400064.12737667374	131276.3764452127	395455.3296295813
sod2∆	50 µg/mL	62.341491855	96	402239.25308374973	132292.30137653765	397603.46100812335
sod2∆	50 µg/mL	62.67276071333334	96	404295.84424461337	133267.58050680594	399634.51931184507
sod2∆	50 µg/mL	63.00712003555555	96	406614.011591527	134338.83253556257	401923.8951740944
sod2∆	50 µg/mL	63.34014973861111	96	408508.2538579867	135376.0328009959	403794.6023700195
sod2∆	50 µg/mL	63.67337021777777	96	410382.07477972005	136431.90459930815	405645.13428034686
sod2∆	50 µg/mL	64.00607752527777	96	412143.8006862808	137347.77793430866	407384.95743893425
sod2∆	50 µg/mL	64.34151589	96	413895.4207564586	138564.44448213323	409114.7937794545
sod2∆	50 µg/mL	64.67424909722223	96	415271.2537521921	139570.42956363835	410473.5118460552
sod2∆	50 µg/mL	65.00776657055556	96	417102.71580729145	140375.08279717335	412282.1848183628
sod2∆	50 µg/mL	65.34115266472223	96	418788.3946417561	141564.7151848292	413946.88226127834
sod2∆	50 µg/mL	65.67463074055556	96	420366.54167790554	142646.89489119808	415505.3808823356
sod2∆	50 µg/mL	66.00653553805556	96	422193.1236252777	143385.7237097602	417309.2147631523
sod2∆	50 µg/mL	66.33941100666667	96	424247.0807476787	144431.03303513597	419337.58373967785
sod2∆	50 µg/mL	66.67281824583333	96	426216.3661210546	145574.56574886656	421282.32752199075
sod2∆	50 µg/mL	67.00665721777779	96	428098.9119333603	146443.4198946764	423141.40516096563
sod2∆	50 µg/mL	67.3412205238889	96	429987.4181210693	147420.15718804437	425006.3614938072
sod2∆	50 µg/mL	67.67457797777777	96	431367.4874914878	148360.99282013022	426369.2166108871
sod2∆	50 µg/mL	68.00802207694444	96	432498.33197423455	149301.6239467689	427485.9526192904
sod2∆	50 µg/mL	68.34138033166667	96	433335.42117680353	150321.43152027653	428312.59656388016
sod2∆	50 µg/mL	68.673654345	96	434367.8740095059	151286.5374158962	429332.1644021662
sod2∆	50 µg/mL	69.00720502222222	96	435251.9580883472	152320.98733572237	430205.2133959073
sod2∆	50 µg/mL	69.3411532675	96	436460.1643579268	153501.26501422	431398.3363310764
sod2∆	50 µg/mL	69.67410458277777	96	437561.8493206532	154279.30671789797	432486.2651929186
sod2∆	50 µg/mL	70.00764999805556	96	438478.0800275727	154920.49951270534	433391.05358430994
sod2∆	50 µg/mL	70.34133991888889	96	440101.59795301064	155712.415601048	434994.29209371016
sod2∆	50 µg/mL	70.67281079916667	96	442915.83331891574	156790.6118890808	437773.3621781046
sod2∆	50 µg/mL	71.0062098375	96	445448.24067746365	157714.33932931608	440274.1122761288
sod2∆	50 µg/mL	71.3396054436111	96	448057.81968774064	158670.04157792364	442851.0559546598
sod2∆	50 µg/mL	71.67325047416666	96	449151.79996158776	159034.45389666347	443931.3509226972
mip1∆	400 µg/mL	0.007211312717861111	288	5901.668907753644	4813.9661112307485
mip1∆	400 µg/mL	0.33930933634444443	288	5906.740735064398	4816.192179619898
mip1∆	400 µg/mL	0.6725926360805555	288	5924.057084885491	4825.216944445994
mip1∆	400 µg/mL	1.0061241674416668	288	5965.193498616969	4857.216229909025
mip1∆	400 µg/mL	1.339634774725	288	6006.41167877242	4891.635460512997
mip1∆	400 µg/mL	1.6727697205555556	288	6059.432954983535	4937.69910431064
mip1∆	400 µg/mL	2.0061583207722222	288	6121.875097189206	4992.774493573127
mip1∆	400 µg/mL	2.339517625502778	288	6192.506248486863	5055.122344700655
mip1∆	400 µg/mL	2.6712641661027776	288	6283.82654572172	5127.88605360498
mip1∆	400 µg/mL	3.005002875527778	288	6419.416933182591	5235.6987875203695
mip1∆	400 µg/mL	3.338550928027778	288	6616.9952521206405	5383.949897270502
mip1∆	400 µg/mL	3.672424407722222	288	6870.098049516248	5568.224891779159
mip1∆	400 µg/mL	4.005260381888889	288	7187.768835000203	5804.801356048048
mip1∆	400 µg/mL	4.338371865222222	288	7571.651309238677	6098.092306518005
mip1∆	400 µg/mL	4.673507818055556	288	8017.201722849472	6436.249005720637
mip1∆	400 µg/mL	5.006539732999999	288	8521.386392136876	6819.524440676315
mip1∆	400 µg/mL	5.340204106638889	288	9098.3101180343	7259.912035798236
mip1∆	400 µg/mL	5.6720175205277785	288	9780.525894587501	7771.588554951317
mip1∆	400 µg/mL	6.005043127194445	288	10571.05659076075	8346.71610512178
mip1∆	400 µg/mL	6.338054738055556	288	11464.59738535305	8972.105687726993
mip1∆	400 µg/mL	6.673241678277778	288	12502.98979727372	9686.220129760852
mip1∆	400 µg/mL	7.006892889416666	288	13674.561249761267	10463.583352681855
mip1∆	400 µg/mL	7.339171786916666	288	14957.744835763786	11290.362670330162
mip1∆	400 µg/mL	7.672895339999999	288	16340.793583650904	12150.595158295346
mip1∆	400 µg/mL	8.006345661944444	288	17802.79113741949	13024.355499539246
mip1∆	400 µg/mL	8.339159586638889	288	19392.24247631439	13956.481874068031
mip1∆	400 µg/mL	8.672303390833333	288	21077.436738396533	14926.907728218997
mip1∆	400 µg/mL	9.006286178833333	288	22858.125804088635	15913.358029041963
mip1∆	400 µg/mL	9.339065111611111	288	24739.2445067455	16927.932679342797
mip1∆	400 µg/mL	9.671935889972222	288	26700.556356429348	17965.489796433572
mip1∆	400 µg/mL	10.005851789722223	288	28775.8046399263	19043.53390201148
mip1∆	400 µg/mL	10.338431011111112	288	30935.64855877606	20144.1381366739
mip1∆	400 µg/mL	10.671724866361112	288	33164.451832983425	21272.22784102573
mip1∆	400 µg/mL	11.005828417472223	288	35436.08783974374	22398.10313228512
mip1∆	400 µg/mL	11.338496445222223	288	37927.56091880505	23654.505707730004
mip1∆	400 µg/mL	11.672082818027777	288	40431.298382627436	24882.734551892274
mip1∆	400 µg/mL	12.006048653055556	288	43021.64842419247	26128.950000267916
mip1∆	400 µg/mL	12.338931124416668	288	45810.17984279439	27473.373702860743
mip1∆	400 µg/mL	12.672341757472223	288	48642.533241103236	28818.67003922656
mip1∆	400 µg/mL	13.00548637	288	51626.399804656634	30216.678683433507
mip1∆	400 µg/mL	13.339049655	288	54608.7490449977	31583.194757468784
mip1∆	400 µg/mL	13.672010526916667	288	57828.92424392173	33079.06585735685
mip1∆	400 µg/mL	14.005187902444444	288	61119.38501747454	34571.898552177954
mip1∆	400 µg/mL	14.338723062472221	288	64509.64624004711	36095.95355247216
mip1∆	400 µg/mL	14.672866679166667	288	68070.99950607859	37690.287065742006
mip1∆	400 µg/mL	15.005791081055554	288	71887.12050084063	39381.49286942397
mip1∆	400 µg/mL	15.339186669388889	288	75826.91858297968	41107.741155297015
mip1∆	400 µg/mL	15.673175869722222	288	79732.8349966646	42775.134670993575
mip1∆	400 µg/mL	16.00591863858333	288	84095.20880793844	44646.71030044262
mip1∆	400 µg/mL	16.33928755052778	288	88258.98064374567	46357.05163896447
mip1∆	400 µg/mL	16.671890118055558	288	92862.02499094975	48264.79504499855
mip1∆	400 µg/mL	17.004934186666667	288	97555.48031305196	50150.34053489544
mip1∆	400 µg/mL	17.339230386083333	288	102373.5808837115	52041.622088703654
mip1∆	400 µg/mL	17.672209991611112	288	107465.1847427569	54029.88253912663
mip1∆	400 µg/mL	18.00518448272222	288	112642.64177454251	56007.997223795806
mip1∆	400 µg/mL	18.339334049416667	288	118030.43971442069	58014.66464264306
mip1∆	400 µg/mL	18.67207516386111	288	123631.33789929892	60074.556050197796
mip1∆	400 µg/mL	19.005210323333333	288	129629.05380384249	62294.32216959767
mip1∆	400 µg/mL	19.33920463025	288	135278.3836270559	64262.09451541466
mip1∆	400 µg/mL	19.67275089216667	288	141677.01372859575	66533.407619694
mip1∆	400 µg/mL	20.006137711333334	288	147586.02348456564	68510.12491647108
mip1∆	400 µg/mL	20.33928404411111	288	154066.67840513284	70699.22473471297
mip1∆	400 µg/mL	20.67259988361111	288	160395.62746581432	72736.08650023711
mip1∆	400 µg/mL	21.005204095249997	288	167462.82889589077	75030.27424115845
mip1∆	400 µg/mL	21.340180545527776	288	174309.99607308098	77088.5875842911
mip1∆	400 µg/mL	21.673431935777778	288	181428.49674122653	79238.25768902601
mip1∆	400 µg/mL	22.00527919052778	288	188723.41819389668	81368.21891901101
mip1∆	400 µg/mL	22.340165954694445	288	196583.3512508481	83661.66065511057
mip1∆	400 µg/mL	22.673961028055555	288	204233.53873801447	85880.33998561346
mip1∆	400 µg/mL	23.00709649080556	288	212275.4257641186	88229.14371519115
mip1∆	400 µg/mL	23.34059206855556	288	220641.7049101373	90607.4590166579
mip1∆	400 µg/mL	23.67312280938889	288	227864.3600475051	92575.6789524748
mip1∆	400 µg/mL	24.00611970888889	288	236047.74360277917	94796.34788625389
mip1∆	400 µg/mL	24.338875996083335	288	243997.840286265	96849.48680503435
mip1∆	400 µg/mL	24.672181804444445	288	252560.2134271688	99071.21001816777
mip1∆	400 µg/mL	25.00726441497222	288	260809.62732668055	101178.20906599674
mip1∆	400 µg/mL	25.340091084694443	288	270578.49981081055	103671.96673699327
mip1∆	400 µg/mL	25.671951346055554	288	279017.76794506115	105746.52642951814
mip1∆	400 µg/mL	26.007106524444445	288	288647.0069386531	108128.13893285388
mip1∆	400 µg/mL	26.34044331497222	288	296775.4401297814	110075.65430699871
mip1∆	400 µg/mL	26.673356774972223	288	306658.76899158274	112456.48252364255
mip1∆	400 µg/mL	27.006286836055555	288	316287.11176613596	114754.47266813219
mip1∆	400 µg/mL	27.33881974552778	288	326658.66573115566	117164.86314501427
mip1∆	400 µg/mL	27.671921888	288	336118.36640037707	119336.07992371716
mip1∆	400 µg/mL	28.005703889444444	288	347203.4394022536	121898.25724028303
mip1∆	400 µg/mL	28.340434442777777	288	356609.6811971851	123994.03860043535
mip1∆	400 µg/mL	28.673355233333332	288	366676.5404722155	126189.43646609856
mip1∆	400 µg/mL	29.005304043611112	288	376242.3380710097	128287.58691565876
mip1∆	400 µg/mL	29.33910094638889	288	387134.1217190637	130660.85865525134
mip1∆	400 µg/mL	29.672880767222225	288	397031.46910623496	132715.82243916555
mip1∆	400 µg/mL	30.006792917777776	288	408307.9391447648	135147.5003433628
mip1∆	400 µg/mL	30.339687291111108	288	419059.0385926011	137403.89981164804
mip1∆	400 µg/mL	30.672898042777778	288	429795.326532131	139601.9662318942
mip1∆	400 µg/mL	31.006589506944447	288	440812.90825092525	141846.14815774636
mip1∆	400 µg/mL	31.339967987500003	288	451871.1780740915	144152.1279982604
mip1∆	400 µg/mL	31.67352263388889	288	462907.51135565626	146363.21845039437
mip1∆	400 µg/mL	32.00708984027778	288	474048.30356586614	148694.58690808294
mip1∆	400 µg/mL	32.33909816388889	288	486111.3954086361	151189.75481394515
mip1∆	400 µg/mL	32.67220799888889	288	496346.36041322415	153227.88413434176
mip1∆	400 µg/mL	33.00732626888889	288	508353.24274818425	155616.8874275904
mip1∆	400 µg/mL	33.33973892277778	288	519898.41312373284	157891.95897877475
mip1∆	400 µg/mL	33.67263500972222	288	530777.7357486438	159994.78638958762
mip1∆	400 µg/mL	34.00607517416667	288	542370.0708342952	162303.30861242212
mip1∆	400 µg/mL	34.33906076472222	288	554160.5611268769	164624.17024540497
mip1∆	400 µg/mL	34.67198718833333	288	566058.2486015504	166946.12196217416
mip1∆	400 µg/mL	35.00538529638889	288	576878.9985136053	169012.4668191659
mip1∆	400 µg/mL	35.33943496	288	589629.9822067328	171467.79823096868
mip1∆	400 µg/mL	35.673114057777774	288	601159.485715397	173714.7646165577
mip1∆	400 µg/mL	36.00617555833333	288	613860.7232946525	176156.172601066
mip1∆	400 µg/mL	36.338771694722226	288	624654.2875798246	178223.45227805525
mip1∆	400 µg/mL	36.67213555	288	637633.9438153586	180774.80199677893
mip1∆	400 µg/mL	37.00565744805556	288	647653.7989681184	182700.4570869758
mip1∆	400 µg/mL	37.33885795055556	288	660237.3747841691	185133.54625348578
mip1∆	400 µg/mL	37.674310266388886	288	671284.6974739205	187322.3628769077
mip1∆	400 µg/mL	38.006089923333334	288	684337.7335302735	189846.01716478742
mip1∆	400 µg/mL	38.33908726916667	288	696498.8087865525	192272.04428104652
mip1∆	400 µg/mL	38.67248072527777	288	710599.3151004681	195034.31333304013
mip1∆	400 µg/mL	39.005887073055554	288	722867.0034698705	197425.24673406602
mip1∆	400 µg/mL	39.34060169805556	288	735147.1609786319	199820.3707207818
mip1∆	400 µg/mL	39.6734668725	288	747489.4777719515	202354.44139137448
mip1∆	400 µg/mL	40.006986446111114	288	759867.451527765	204844.0424185254
mip1∆	400 µg/mL	40.339780983611114	288	770908.7842893524	207069.35410415995
mip1∆	400 µg/mL	40.67259883972222	288	783096.5842571026	209552.9911802305
mip1∆	400 µg/mL	41.00578382333333	288	795271.9276255174	212056.52604309586
mip1∆	400 µg/mL	41.34051669944445	288	806790.3387606624	214348.05281900364
mip1∆	400 µg/mL	41.67344762194444	288	816872.0019029558	216443.5753717563
mip1∆	400 µg/mL	42.00647827638889	288	830117.0685304243	219238.42114265074
mip1∆	400 µg/mL	42.339870622777774	288	842129.7558631283	221762.13740375199
mip1∆	400 µg/mL	42.672685449999996	288	855386.3545875382	224582.7767256969
mip1∆	400 µg/mL	43.00592886055556	288	866999.6261038627	227164.83566753118
mip1∆	400 µg/mL	43.34013195861111	288	880695.8428493885	230177.0235948264
mip1∆	400 µg/mL	43.673320825	288	890794.1336413986	232399.7777555156
mip1∆	400 µg/mL	44.006757336944446	288	902616.4055355677	235146.54210660647
mip1∆	400 µg/mL	44.34083611472222	288	912809.0159005373	237532.46166005332
mip1∆	400 µg/mL	44.67358670722222	288	925995.4688017416	240488.51157837824
mip1∆	400 µg/mL	45.00676466555555	288	937475.5499511507	243138.59579624565
mip1∆	400 µg/mL	45.339517172777775	288	950886.1714691084	246349.08776650127
mip1∆	400 µg/mL	45.672822647222226	288	961088.2297947416	248801.21901867187
mip1∆	400 µg/mL	46.006888707777776	288	974839.0283183214	251971.57449473537
mip1∆	400 µg/mL	46.339579191944445	288	985270.7342917364	254536.1881052844
mip1∆	400 µg/mL	46.672859978055556	288	998345.6732304097	257710.0068268833
mip1∆	400 µg/mL	47.006505544166664	288	1009877.3141864921	260506.6719182843
mip1∆	400 µg/mL	47.33998983361111	288	1023622.6733534477	263728.63493510307
mip1∆	400 µg/mL	47.673561754999994	288	1035636.4723349208	266781.4069175898
mip1∆	400 µg/mL	48.00674417305556	288	1047486.6059777526	269841.51633945195
mip1∆	400 µg/mL	48.3391923875	288	1059382.336573715	272799.68681285944
mip1∆	400 µg/mL	48.672650059722216	288	1072383.6723385442	276068.6489774865
mip1∆	400 µg/mL	49.00767717694444	288	1083278.718504557	278984.52829009417
mip1∆	400 µg/mL	49.34111984138889	288	1093068.868423325	281622.28767821717
mip1∆	400 µg/mL	49.67288874	288	1106022.635469885	285089.90473420604
mip1∆	400 µg/mL	50.00571684388889	288	1115818.1309583175	287908.3868105367
mip1∆	400 µg/mL	50.34117219638889	288	1127386.0094975685	291164.42087343923
mip1∆	400 µg/mL	50.67421322416667	288	1139778.1379185084	294670.4640532056
mip1∆	400 µg/mL	51.007413496944444	288	1151577.3156926879	298034.95452045
mip1∆	400 µg/mL	51.340875155	288	1162727.9340942772	301221.3071382462
mip1∆	400 µg/mL	51.67270957694445	288	1173767.0580651006	304434.5246658855
mip1∆	400 µg/mL	52.007701945	288	1184042.9589531836	307564.9744723793
mip1∆	400 µg/mL	52.340902682777774	288	1193694.6579892323	310549.9531671276
mip1∆	400 µg/mL	52.67446248555556	288	1206041.5536640536	314225.25680350605
mip1∆	400 µg/mL	53.007510422222225	288	1215526.8157523994	317102.96786266484
mip1∆	400 µg/mL	53.340452479166665	288	1227791.2265491358	320876.6536137432
mip1∆	400 µg/mL	53.67408596972222	288	1238621.9062628634	324251.6972258821
mip1∆	400 µg/mL	54.007559986388884	288	1249677.0185255054	327725.84815128293
mip1∆	400 µg/mL	54.34089492777778	288	1259931.2615460376	331079.7351607186
mip1∆	400 µg/mL	54.67272772555555	288	1270270.462301723	334554.68703619944
mip1∆	400 µg/mL	55.006480788055555	288	1280247.825851544	337710.11407054303
mip1∆	400 µg/mL	55.33972919722222	288	1290802.5693236166	341110.71548706404
mip1∆	400 µg/mL	55.67279547111111	288	1301114.4394704604	344483.6949143532
mip1∆	400 µg/mL	56.00700773638889	288	1309821.2739301429	347597.892118143
mip1∆	400 µg/mL	56.34018845527778	288	1320862.4807135705	351258.29777484946
mip1∆	400 µg/mL	56.6737129475	288	1330995.7571288212	354886.9258342073
mip1∆	400 µg/mL	57.007577930277776	288	1340594.8009725572	358565.7825436265
mip1∆	400 µg/mL	57.34068150833333	288	1349668.020521294	361965.90556644165
mip1∆	400 µg/mL	57.673866357777776	288	1359503.535377673	365955.2436993088
mip1∆	400 µg/mL	58.00712310694444	288	1367328.1723010214	368930.73248280946
mip1∆	400 µg/mL	58.34018183277777	288	1377479.0319174575	372829.88455062173
mip1∆	400 µg/mL	58.673498969166666	288	1387597.4668226326	376423.08142504044
mip1∆	400 µg/mL	59.00749386166667	288	1398433.1076126418	380406.9356262742
mip1∆	400 µg/mL	59.34002307888889	288	1407777.1793255776	383618.161298424
mip1∆	400 µg/mL	59.6734037225	288	1419476.892860056	388049.43168655224
mip1∆	400 µg/mL	60.00668166888889	288	1427924.0035579475	391489.0094289429
mip1∆	400 µg/mL	60.340185895	288	1436420.4670874327	395539.9790057924
mip1∆	400 µg/mL	60.67419285555555	288	1445074.988411072	399034.2657239273
mip1∆	400 µg/mL	61.006843659999994	288	1455949.0489875174	403407.7586617422
mip1∆	400 µg/mL	61.34035626277778	288	1463985.973745982	407167.50389616314
mip1∆	400 µg/mL	61.6739266875	288	1473794.7896456276	411277.7344127284
mip1∆	400 µg/mL	62.007949466944446	288	1483357.0494926088	414970.04825525027
mip1∆	400 µg/mL	62.341491855	288	1494272.3456787455	419761.3438419897
mip1∆	400 µg/mL	62.67276071333334	288	1502589.7761112137	423403.19456714555
mip1∆	400 µg/mL	63.00712003555555	288	1512987.8213940435	427753.99113468296
mip1∆	400 µg/mL	63.34014973861111	288	1521757.6402179084	431745.5041598835
mip1∆	400 µg/mL	63.67337021777777	288	1532000.9820874904	436280.37814004737
mip1∆	400 µg/mL	64.00607752527777	288	1540068.9270712377	440085.7090948517
mip1∆	400 µg/mL	64.34151589	288	1550298.9411302553	444855.84691133985
mip1∆	400 µg/mL	64.67424909722223	288	1558455.6424090131	448956.4017481663
mip1∆	400 µg/mL	65.00776657055556	288	1566311.845814435	452890.91565823084
mip1∆	400 µg/mL	65.34115266472223	288	1575205.7511252163	457393.04030905804
mip1∆	400 µg/mL	65.67463074055556	288	1583904.8339224886	461696.4524417317
mip1∆	400 µg/mL	66.00653553805556	288	1590739.850511445	465452.3547939314
mip1∆	400 µg/mL	66.33941100666667	288	1599826.4742986949	469992.9573085286
mip1∆	400 µg/mL	66.67281824583333	288	1608867.5424120722	474452.97615635145
mip1∆	400 µg/mL	67.00665721777779	288	1616873.8371853426	478701.41356022435
mip1∆	400 µg/mL	67.3412205238889	288	1625426.9837399465	483475.56818784535
mip1∆	400 µg/mL	67.67457797777777	288	1633320.224066985	487585.3586023786
mip1∆	400 µg/mL	68.00802207694444	288	1640784.6950121026	492145.19314223307
mip1∆	400 µg/mL	68.34138033166667	288	1648144.2783782068	496437.32334681996
mip1∆	400 µg/mL	68.673654345	288	1654171.6200368837	499997.44185030466
mip1∆	400 µg/mL	69.00720502222222	288	1661805.8223606308	504514.68410530826
mip1∆	400 µg/mL	69.3411532675	288	1669612.0828272353	509032.9938171813
mip1∆	400 µg/mL	69.67410458277777	288	1675601.397795868	512715.1526469106
mip1∆	400 µg/mL	70.00764999805556	288	1681731.8946138336	517221.37333823537
mip1∆	400 µg/mL	70.34133991888889	288	1688462.0092384825	521363.9560746279
mip1∆	400 µg/mL	70.67281079916667	288	1696049.172684522	525567.4029540042
mip1∆	400 µg/mL	71.0062098375	288	1703250.540170953	529696.181804386
mip1∆	400 µg/mL	71.3396054436111	288	1709752.1532899071	532903.3975153479
mip1∆	400 µg/mL	71.67325047416666	288	1711570.7317668968	533263.2573924068
Founder	400 µg/mL	0.007211312717861111	480	14491.161059424441	37116.6632937045	14999.999999999993
Founder	400 µg/mL	0.33930933634444443	480	14458.442768841753	37197.28477263869	14966.010998294358
Founder	400 µg/mL	0.6725926360805555	480	14355.6862148083	37416.5345738274	14859.265395283572
Founder	400 µg/mL	1.0061241674416668	480	14200.89143949574	37634.82158393244	14698.4666291805
Founder	400 µg/mL	1.339634774725	480	14032.756881518042	37957.23022136027	14523.817828360543
Founder	400 µg/mL	1.6727697205555556	480	13894.131668257929	38203.3720157291	14379.827354024192
Founder	400 µg/mL	2.0061583207722222	480	13820.420429677044	38404.09002602637	14303.265347099315
Founder	400 µg/mL	2.339517625502778	480	13852.061052619589	38591.7619745269	14336.129485490554
Founder	400 µg/mL	2.6712641661027776	480	14005.396674730518	38796.46172599717	14495.398282300202
Founder	400 µg/mL	3.005002875527778	480	14281.548807017145	38899.47028653056	14782.251652772224
Founder	400 µg/mL	3.338550928027778	480	14713.660824005648	39006.23998099995	15231.148497769605
Founder	400 µg/mL	3.672424407722222	480	15298.588016642316	39103.64673300253	15838.871827937697
Founder	400 µg/mL	4.005260381888889	480	16088.520319072752	39163.638783558985	16659.722149938756
Founder	400 µg/mL	4.338371865222222	480	17110.391014450954	39168.362076514284	17721.803422541303
Founder	400 µg/mL	4.673507818055556	480	18342.65953898928	39179.54456432045	19002.864560646045
Founder	400 µg/mL	5.006539732999999	480	19753.318177383462	39185.57893429213	20469.759006329492
Founder	400 µg/mL	5.340204106638889	480	21315.528557284186	39189.159503403454	22094.686453653314
Founder	400 µg/mL	5.6720175205277785	480	23024.120375756866	39227.55721850108	23872.36257975785
Founder	400 µg/mL	6.005043127194445	480	24819.09960312765	39422.179080980444	25740.430791652147
Founder	400 µg/mL	6.338054738055556	480	26627.84872122586	39674.24626754258	27623.322239541198
Founder	400 µg/mL	6.673241678277778	480	28509.311619206434	39959.08683390338	29582.39691879106
Founder	400 µg/mL	7.006892889416666	480	30402.15603028765	40253.24858721403	31553.792868460303
Founder	400 µg/mL	7.339171786916666	480	32233.418885715313	40531.122423517954	33461.47303144087
Founder	400 µg/mL	7.672895339999999	480	34003.36489852632	40720.632827252506	35305.64910082773
Founder	400 µg/mL	8.006345661944444	480	35731.60369941276	40880.29334108959	37106.702744348266
Founder	400 µg/mL	8.339159586638889	480	37466.1791811016	41157.238457637	38914.675681071705
Founder	400 µg/mL	8.672303390833333	480	39204.80164927758	41489.75234586846	40727.16952559456
Founder	400 µg/mL	9.006286178833333	480	40963.44977107636	41862.80280974524	42560.83449606153
Founder	400 µg/mL	9.339065111611111	480	42757.61797471489	42220.31433929846	44431.82692704024
Founder	400 µg/mL	9.671935889972222	480	44580.622286959806	42543.089317574435	46333.17987976878
Founder	400 µg/mL	10.005851789722223	480	46488.08634711094	42782.373235849926	48322.922208695396
Founder	400 µg/mL	10.338431011111112	480	48468.63151198544	43023.53718164724	50389.20912411593
Founder	400 µg/mL	10.671724866361112	480	50497.74938976269	43393.178615975645	52506.486974405445
Founder	400 µg/mL	11.005828417472223	480	52551.60480481274	43855.60908837403	54649.88927150114
Founder	400 µg/mL	11.338496445222223	480	54862.08415839661	44410.33738520119	57061.46434478018
Founder	400 µg/mL	11.672082818027777	480	57128.3037354098	45034.057550182595	59427.198642929965
Founder	400 µg/mL	12.006048653055556	480	59439.11050119502	45671.14694645623	61839.8261500321
Founder	400 µg/mL	12.338931124416668	480	61919.156205930194	46273.27218487032	64429.52538626992
Founder	400 µg/mL	12.672341757472223	480	64410.95864745519	46857.05610845521	67031.87755313913
Founder	400 µg/mL	13.00548637	480	66951.99150021275	47438.75555959646	69686.01772440183
Founder	400 µg/mL	13.339049655	480	69435.56953761021	47992.56637126026	72280.4964590795
Founder	400 µg/mL	13.672010526916667	480	72088.48057149256	48629.61510943491	75052.23854804343
Founder	400 µg/mL	14.005187902444444	480	74733.63902512018	49287.99253417708	77816.24671501001
Founder	400 µg/mL	14.338723062472221	480	77423.33687921784	50095.11128450274	80627.1568429203
Founder	400 µg/mL	14.672866679166667	480	80227.21245117202	51031.621636744414	83557.76451908666
Founder	400 µg/mL	15.005791081055554	480	83226.18539103192	52021.84750836553	86692.6958531746
Founder	400 µg/mL	15.339186669388889	480	86299.9387254581	53058.710359648474	89906.21998114468
Founder	400 µg/mL	15.673175869722222	480	89330.69461841998	54036.673447713256	93075.19530545491
Founder	400 µg/mL	16.00591863858333	480	92736.235610234	55044.730043637595	96636.50956965618
Founder	400 µg/mL	16.33928755052778	480	95914.542639042	56027.72509837954	99960.62136723711
Founder	400 µg/mL	16.671890118055558	480	99494.79413284131	57101.274034769	103705.59148270707
Founder	400 µg/mL	17.004934186666667	480	103124.99053447168	58159.664699472574	107503.30001026054
Founder	400 µg/mL	17.339230386083333	480	106885.84725229828	59378.85898814493	111438.20582434937
Founder	400 µg/mL	17.672209991611112	480	110905.05398443149	60665.30134468645	115643.96883725644
Founder	400 µg/mL	18.00518448272222	480	115048.62452806132	61979.81743599441	119980.44285177499
Founder	400 µg/mL	18.339334049416667	480	119421.86403340985	63429.70911411182	124557.88800973512
Founder	400 µg/mL	18.67207516386111	480	124046.87161365009	64984.05620290073	129399.51405407517
Founder	400 µg/mL	19.005210323333333	480	129031.46612077132	66581.83500972933	134618.29630065465
Founder	400 µg/mL	19.33920463025	480	133772.60696372035	68052.04719508407	139582.86133738226
Founder	400 µg/mL	19.67275089216667	480	139243.11898508956	69669.97621367451	145311.95518951374
Founder	400 µg/mL	20.006137711333334	480	144336.4866819843	71058.734470977	150646.80744702363
Founder	400 µg/mL	20.33928404411111	480	150021.67325524124	72509.20762022068	156602.3376448788
Founder	400 µg/mL	20.67259988361111	480	155679.25960938688	73897.16322061919	162529.76247767344
Founder	400 µg/mL	21.005204095249997	480	162091.11304957958	75474.7793462899	169248.36589482013
Founder	400 µg/mL	21.340180545527776	480	168371.0465881908	76917.02342940096	175829.66671753125
Founder	400 µg/mL	21.673431935777778	480	175008.82160030247	78417.2775550906	182786.94224411022
Founder	400 µg/mL	22.00527919052778	480	181928.82669522357	79935.29547959934	190041.04435480776
Founder	400 µg/mL	22.340165954694445	480	189467.94029779237	81635.29170246692	197945.275769434
Founder	400 µg/mL	22.673961028055555	480	196962.3214019868	83267.3270047478	205803.73157352672
Founder	400 µg/mL	23.00709649080556	480	204921.65841493747	85009.03798670972	214150.90948839192
Founder	400 µg/mL	23.34059206855556	480	213233.79973995133	86874.13408059237	222869.32937692953
Founder	400 µg/mL	23.67312280938889	480	220610.95078634023	88504.79909045805	230608.08592944182
Founder	400 µg/mL	24.00611970888889	480	228948.6310394998	90198.91580839847	239355.5746564923
Founder	400 µg/mL	24.338875996083335	480	237116.29849754003	91798.00038065354	247925.80739099722
Founder	400 µg/mL	24.672181804444445	480	245959.27310269323	93484.18722786858	257205.82961960474
Founder	400 µg/mL	25.00726441497222	480	254596.6350015387	95044.46217010947	266271.2379376317
Founder	400 µg/mL	25.340091084694443	480	264716.5086186078	96821.17931733212	276894.03459660773
Founder	400 µg/mL	25.671951346055554	480	273686.9290967607	98400.23831852201	286311.47932089126
Founder	400 µg/mL	26.007106524444445	480	283880.14636979444	100169.6038137818	297014.00447050174
Founder	400 µg/mL	26.34044331497222	480	292762.6659407117	101748.61424417615	306341.47310654726
Founder	400 µg/mL	26.673356774972223	480	303381.46475445933	103571.08825485237	317493.5312263468
Founder	400 µg/mL	27.006286836055555	480	313793.33034983184	105387.3568907783	328429.63008438237
Founder	400 µg/mL	27.33881974552778	480	324970.29226980923	107168.1881547319	340170.80137893
Founder	400 µg/mL	27.671921888	480	335235.5052972112	108773.99465379924	350955.4819136575
Founder	400 µg/mL	28.005703889444444	480	347106.1468093864	110615.79603234012	363428.3141621932
Founder	400 µg/mL	28.340434442777777	480	357363.54713301983	112187.14706055015	374207.30605335586
Founder	400 µg/mL	28.673355233333332	480	368296.57476789335	113834.86146598689	385697.50748438
Founder	400 µg/mL	29.005304043611112	480	378758.13664282905	115462.07197185882	396693.36708487826
Founder	400 µg/mL	29.33910094638889	480	390557.8378996391	117245.71955102304	409097.01965615846
Founder	400 µg/mL	29.672880767222225	480	401360.82460277807	118778.17430461694	420454.1270572139
Founder	400 µg/mL	30.006792917777776	480	413548.27982575435	120448.56451272263	433268.0374229182
Founder	400 µg/mL	30.339687291111108	480	425221.04859797505	121998.41538394144	445542.0816425665
Founder	400 µg/mL	30.672898042777778	480	436821.1767313677	123577.85595806391	457740.94603129063
Founder	400 µg/mL	31.006589506944447	480	448764.35104700923	125190.8493085415	470301.78181255254
Founder	400 µg/mL	31.339967987500003	480	460629.8532057447	126798.82987458663	482782.12112019863
Founder	400 µg/mL	31.67352263388889	480	472525.04766560544	128395.12778831803	495294.8537802875
Founder	400 µg/mL	32.00708984027778	480	484527.41080832627	130059.93603926331	507921.46882780065
Founder	400 µg/mL	32.33909816388889	480	497389.40700249316	131758.87603359716	521453.67707443744
Founder	400 µg/mL	32.67220799888889	480	508349.8605563592	133225.7308290725	532986.2533146932
Founder	400 µg/mL	33.00732626888889	480	521184.15542471106	134907.76261885095	546491.6203229212
Founder	400 µg/mL	33.33973892277778	480	533506.132585251	136554.59658584234	559459.0095191705
Founder	400 µg/mL	33.67263500972222	480	545072.5203277216	138059.65423300353	571632.2144903265
Founder	400 µg/mL	34.00607517416667	480	557430.693156445	139694.23390186683	584639.772422132
Founder	400 µg/mL	34.33906076472222	480	570000.2475130131	141274.1540031526	597870.8848647296
Founder	400 µg/mL	34.67198718833333	480	582663.5123871671	143031.25677362154	611201.7027710945
Founder	400 µg/mL	35.00538529638889	480	594159.240309635	144618.05862763728	623304.3405681351
Founder	400 µg/mL	35.33943496	480	607701.0221856292	146418.81754049403	637562.1333277492
Founder	400 µg/mL	35.673114057777774	480	619892.1470825828	148076.7549847445	650398.8339102294
Founder	400 µg/mL	36.00617555833333	480	633268.9363940342	149828.83731953052	664485.0309746449
Founder	400 µg/mL	36.338771694722226	480	644591.5267519548	151182.5319542237	676408.9277963343
Founder	400 µg/mL	36.67213555	480	658180.4804585642	152851.63895444313	690720.5422393582
Founder	400 µg/mL	37.00565744805556	480	668747.0734057107	154229.70439977176	701849.8034886053
Founder	400 µg/mL	37.33885795055556	480	682045.2144211341	155936.5560831672	715856.9660474743
Founder	400 µg/mL	37.674310266388886	480	693730.0177483478	157539.3506402461	728165.584681794
Founder	400 µg/mL	38.006089923333334	480	707534.8892450844	159293.41936702144	742708.4167187036
Founder	400 µg/mL	38.33908726916667	480	720471.9586194081	161043.55899513743	756337.985102636
Founder	400 µg/mL	38.67248072527777	480	735409.4147720288	162980.81494301368	772076.1131424375
Founder	400 µg/mL	39.005887073055554	480	748385.7555108848	164702.94184604858	785748.9423192946
Founder	400 µg/mL	39.34060169805556	480	761394.9225081403	166512.4901533355	799457.216892598
Founder	400 µg/mL	39.6734668725	480	774497.5919275836	168392.6472605156	813264.8714672454
Founder	400 µg/mL	40.006986446111114	480	787570.0880013889	170166.82819526503	827041.5677899974
Founder	400 µg/mL	40.339780983611114	480	799202.289566352	171733.15566825602	839301.0756162269
Founder	400 µg/mL	40.67259883972222	480	812119.0843650996	173552.6490876891	852915.2055040983
Founder	400 µg/mL	41.00578382333333	480	824991.3889284284	175362.75078420373	866483.2192616236
Founder	400 µg/mL	41.34051669944445	480	837104.093682472	177081.8454165857	879251.275760628
Founder	400 µg/mL	41.67344762194444	480	847882.1499811464	178662.95932081938	890613.0331709523
Founder	400 µg/mL	42.00647827638889	480	861989.0527195982	180723.56613021286	905484.7005430146
Founder	400 µg/mL	42.339870622777774	480	874790.6887547793	182528.09142934027	918981.099148634
Founder	400 µg/mL	42.672685449999996	480	889027.9099906039	184657.01346195987	933991.8293017428
Founder	400 µg/mL	43.00592886055556	480	901529.8718168144	186634.02334020092	947173.7378230061
Founder	400 µg/mL	43.34013195861111	480	915999.409069611	188973.19830643307	962431.0541732184
Founder	400 µg/mL	43.673320825	480	926826.5401302761	190787.79083126452	973848.2258740616
Founder	400 µg/mL	44.006757336944446	480	939457.0917188101	193038.57936211766	987167.7049302383
Founder	400 µg/mL	44.34083611472222	480	950364.8889468341	194914.85561358332	998670.982195011
Founder	400 µg/mL	44.67358670722222	480	964564.6160806392	197249.83787371457	1013646.6145945303
Founder	400 µg/mL	45.00676466555555	480	977014.7509463476	199408.4640300848	1026777.7068286081
Founder	400 µg/mL	45.339517172777775	480	991344.1073825965	201980.11182627123	1041891.5498447722
Founder	400 µg/mL	45.672822647222226	480	1002502.5695875331	203923.6712109967	1053661.4478533135
Founder	400 µg/mL	46.006888707777776	480	1017382.7169416486	206434.71640122388	1069357.6967053837
Founder	400 µg/mL	46.339579191944445	480	1028763.6331512033	208602.8180727511	1081363.3578787
Founder	400 µg/mL	46.672859978055556	480	1042984.9797139495	211126.58000474758	1096366.0440282738
Founder	400 µg/mL	47.006505544166664	480	1055717.8577381298	213399.4738868834	1109799.108727269
Founder	400 µg/mL	47.33998983361111	480	1070673.9501221958	216192.37702487543	1125578.3881609752
Founder	400 µg/mL	47.673561754999994	480	1083866.6490610016	218815.00039332817	1139497.8759725771
Founder	400 µg/mL	48.00674417305556	480	1096873.462044548	221402.78461096442	1153221.834817328
Founder	400 µg/mL	48.3391923875	480	1109982.6590965237	223987.44197236528	1167054.415923879
Founder	400 µg/mL	48.672650059722216	480	1124169.3767148266	226751.4495098548	1182024.6395004948
Founder	400 µg/mL	49.00767717694444	480	1135969.2140854546	229187.31212285723	1194476.6786518812
Founder	400 µg/mL	49.34111984138889	480	1146706.1355312378	231532.25944947032	1205807.4572577123
Founder	400 µg/mL	49.67288874	480	1160758.8889737653	234396.03841426945	1220638.042775788
Founder	400 µg/mL	50.00571684388889	480	1171470.1634435814	236867.64886002292	1231942.6303339312
Founder	400 µg/mL	50.34117219638889	480	1184098.773133279	239644.41767501226	1245271.2350952213
Founder	400 µg/mL	50.67421322416667	480	1197744.4968382122	242621.59092263778	1259673.9071963003
Founder	400 µg/mL	51.007413496944444	480	1210612.0064399543	245528.81496544005	1273255.738086209
Founder	400 µg/mL	51.340875155	480	1222908.0077472515	248477.78810383737	1286234.820164007
Founder	400 µg/mL	51.67270957694445	480	1235048.300311695	251374.3283086878	1299050.0046008355
Founder	400 µg/mL	52.007701945	480	1246333.3661195177	254307.65650923716	1310962.8263365943
Founder	400 µg/mL	52.340902682777774	480	1256918.8637299594	257142.22797198442	1322137.5181200788
Founder	400 µg/mL	52.67446248555556	480	1270400.9227850174	260540.25426857854	1336370.4858779737
Founder	400 µg/mL	53.007510422222225	480	1280866.9565645882	263294.69129281334	1347419.820564205
Founder	400 µg/mL	53.340452479166665	480	1294248.6251333456	266718.9250096764	1361547.7597695552
Founder	400 µg/mL	53.67408596972222	480	1306117.5948687783	269786.5500507839	1374079.0802369541
Founder	400 µg/mL	54.007559986388884	480	1318127.5942986314	272923.07931882155	1386759.718103289
Founder	400 µg/mL	54.34089492777778	480	1329206.0383032179	275884.2899811655	1398457.151577371
Founder	400 µg/mL	54.67272772555555	480	1340300.132034966	278991.2589729751	1410171.46110089
Founder	400 µg/mL	55.006480788055555	480	1351239.8147195543	282018.6869607671	1421723.069241221
Founder	400 µg/mL	55.33972919722222	480	1362768.3129267197	285362.3168431019	1433896.793573906
Founder	400 µg/mL	55.67279547111111	480	1374057.6504488003	288681.4721548818	1445818.331408335
Founder	400 µg/mL	56.00700773638889	480	1383602.3122524365	291799.3733830728	1455897.7674393514
Founder	400 µg/mL	56.34018845527778	480	1395659.1102141342	295258.82202679286	1468630.4489456343
Founder	400 µg/mL	56.6737129475	480	1406474.366123926	298560.90840058785	1480052.3268766073
Founder	400 µg/mL	57.007577930277776	480	1416710.657802865	301959.97559197893	1490863.058232839
Founder	400 µg/mL	57.34068150833333	480	1426415.0605563067	305128.6940994697	1501112.3119919344
Founder	400 µg/mL	57.673866357777776	480	1436822.5008982767	308768.8362696481	1512104.3542637778
Founder	400 µg/mL	58.00712310694444	480	1445289.5466655479	311629.63159314863	1521047.2186786614
Founder	400 µg/mL	58.34018183277777	480	1456196.863490918	315164.2305276862	1532567.7669093397
Founder	400 µg/mL	58.673498969166666	480	1467069.949040381	318437.5412637797	1544052.4686799506
Founder	400 µg/mL	59.00749386166667	480	1478616.084139237	322026.223240773	1556248.41495841
Founder	400 µg/mL	59.34002307888889	480	1488825.729485104	325151.51683354494	1567032.9403166098
Founder	400 µg/mL	59.6734037225	480	1501316.585953814	329319.9044264748	1580227.4883186393
Founder	400 µg/mL	60.00668166888889	480	1510315.1072109863	332729.3843029524	1589733.2002879118
Founder	400 µg/mL	60.340185895	480	1519258.7472870168	336445.2294947905	1599181.139906189
Founder	400 µg/mL	60.67419285555555	480	1528617.1331631874	339704.10860975244	1609067.425811349
Founder	400 µg/mL	61.006843659999994	480	1540092.383792479	343573.2490528586	1621190.2847603154
Founder	400 µg/mL	61.34035626277778	480	1548486.8825418276	346962.9251450904	1630058.73511205
Founder	400 µg/mL	61.6739266875	480	1558872.1913547586	350618.1106761905	1641030.635781161
Founder	400 µg/mL	62.007949466944446	480	1569033.4493967765	353957.2769610809	1651766.0854973576
Founder	400 µg/mL	62.341491855	480	1580556.495312186	358178.5181639725	1663940.5778341787
Founder	400 µg/mL	62.67276071333334	480	1589382.5482305142	361431.811462696	1673265.8211218277
Founder	400 µg/mL	63.00712003555555	480	1600551.3406856824	365271.4885890281	1685066.5735598507
Founder	400 µg/mL	63.34014973861111	480	1609948.879976677	368900.10721323226	1694996.0804876315
Founder	400 µg/mL	63.67337021777777	480	1621073.8324788674	373180.8226996441	1706751.0542816364
Founder	400 µg/mL	64.00607752527777	480	1629815.2697527783	376871.0181877498	1715987.7350790284
Founder	400 µg/mL	64.34151589	480	1640881.676267544	381337.49967027735	1727681.3613841045
Founder	400 µg/mL	64.67424909722223	480	1649613.0018174255	385274.37923534465	1736907.7600041921
Founder	400 µg/mL	65.00776657055556	480	1658058.752377686	389037.23965912726	1745832.5586837514
Founder	400 µg/mL	65.34115266472223	480	1667625.3292712856	393125.0898876853	1755941.9553931106
Founder	400 µg/mL	65.67463074055556	480	1676976.6178441748	397020.1387910994	1765824.0499517072
Founder	400 µg/mL	66.00653553805556	480	1684248.2866835103	400424.0123488064	1773508.6168318365
Founder	400 µg/mL	66.33941100666667	480	1694019.745619829	404382.1803875171	1783835.1043500954
Founder	400 µg/mL	66.67281824583333	480	1703875.0187484843	408419.1553183011	1794250.3841095828
Founder	400 µg/mL	67.00665721777779	480	1712486.4476543632	412156.8365051038	1803351.318313814
Founder	400 µg/mL	67.3412205238889	480	1721620.9100073888	416383.2843571788	1813005.197260175
Founder	400 µg/mL	67.67457797777777	480	1730231.401625449	420193.2600133555	1822105.4796572076
Founder	400 µg/mL	68.00802207694444	480	1738338.055382192	424485.1044825129	1830673.4134743833
Founder	400 µg/mL	68.34138033166667	480	1746364.6579854994	428450.18348854774	1839156.8829133566
Founder	400 µg/mL	68.673654345	480	1752921.5118172474	431847.0676765594	1846087.051087752
Founder	400 µg/mL	69.00720502222222	480	1761292.063801268	436056.03966526984	1854934.315922345
Founder	400 µg/mL	69.3411532675	480	1769872.379733924	440244.53865067713	1864003.4481970952
Founder	400 µg/mL	69.67410458277777	480	1776422.4396701094	443720.1837345652	1870926.7684319147
Founder	400 µg/mL	70.00764999805556	480	1782874.94913507	447808.69909064245	1877747.0691137712
Founder	400 µg/mL	70.34133991888889	480	1790258.8884156959	451569.1945568348	1885551.999917037
Founder	400 µg/mL	70.67281079916667	480	1798672.125301738	455241.05316321563	1894445.0545006648
Founder	400 µg/mL	71.0062098375	480	1806576.9130530313	458707.7043828075	1902800.798978746
Founder	400 µg/mL	71.3396054436111	480	1813853.0763009693	461333.35869574314	1910492.173246473
Founder	400 µg/mL	71.67325047416666	480	1816021.3679351807	461591.78354946285	1912784.2189919949
