# Supplementary material for: Genetically controlled mtDNA deletions prevent ROS damage by arresting oxidative phosphorylation
Source: eLife. 2022 Jul 8;11:e76095. doi: 10.7554/eLife.76095 (PMC9427111; doi:10.7554/eLife.76095)
Supplement: Figure 4—source data 3. — Data are shown in Figure 4B and in Figure 4—figure supplement 1B. [file elife-76095-fig4-data3.xlsx]

## Sheet: Data S30 - SOD2 qPCR
README: Ct values are capped at 30. Thus, values with 0 standard deviation if both replicates are capped.
Batch cycle t	Population	Primer	N	Log2 Fold change	SD Log2 Fold change	S.E.M Log2 Fold change	Generations of selection G	Relative doubling time (h)	Relative doubling time (h) S.E.M
0	sod2∆ 2E	ATP6	2	1.671265440429348	0.010859155664813791	0.007678582608550143	0	1.4961888625205166	0.04363416727992873
0	sod2∆ 2E	ATP8	2	1.8758516513224475	0.023406389809014813	0.01655081695705007	0	1.4961888625205166	0.04363416727992873
0	sod2∆ 2E	COB	2	1.5853802681055527	0.022760586659475463	0.016094165170699167	0	1.4961888625205166	0.04363416727992873
0	sod2∆ 2E	COX1	2	2.051742292698547	0.04003190635437136	0.028306832447000826	0	1.4961888625205166	0.04363416727992873
0	sod2∆ 2E	COX2	2	1.8526750088773998	0.01920577045345443	0.013580530525549861	0	1.4961888625205166	0.04363416727992873
0	sod2∆ 2E	COX3	2	1.5870886239281958	5.990466849126605e-4	4.235899731490633e-4	0	1.4961888625205166	0.04363416727992873
0	sod2∆ 2E	OLI1	2	1.8223393467664017	0.07288697983544418	0.05153887770184972	0	1.4961888625205166	0.04363416727992873
0	sod2∆ 2E	RNL	2	1.7470326833531997	0.034945706362461824	0.024710345942250633	0	1.4961888625205166	0.04363416727992873
0	sod2∆ 2E	RNS	2	1.754204771436548	0.06860607950116829	0.04851182404589949	0	1.4961888625205166	0.04363416727992873
0	sod2∆ 2E	VAR1	2	1.7380055888551507	0.01226230945480337	0.008670762168499378	0	1.4961888625205166	0.04363416727992873
11	sod2∆ 2E	ATP6	2	-1.2180316487478997	0.0595771248111331	0.04212738895754952	47.511476514896586	1.0542024586187235	0.12864498355732235
11	sod2∆ 2E	ATP8	2	-0.9997316827316496	0.0019235482717580236	0.0013601540268997623	47.511476514896586	1.0542024586187235	0.12864498355732235
11	sod2∆ 2E	COB	2	-0.8704609088170994	0.12387252119767435	0.08759109974154988	47.511476514896586	1.0542024586187235	0.12864498355732235
11	sod2∆ 2E	COX1	2	-0.45425555437565285	0.19729416374582376	0.13950804107320106	47.511476514896586	1.0542024586187235	0.12864498355732235
11	sod2∆ 2E	COX2	2	0.35217938230525014	0.07852155331834157	0.05552312282070037	47.511476514896586	1.0542024586187235	0.12864498355732235
11	sod2∆ 2E	COX3	2	0.3425277263844464	0.12556024061778465	0.0887844975882501	47.511476514896586	1.0542024586187235	0.12864498355732235
11	sod2∆ 2E	OLI1	2	-0.48403358659079926	0.08823811872048733	0.06239377210640023	47.511476514896586	1.0542024586187235	0.12864498355732235
11	sod2∆ 2E	RNL	2	-0.18493411778669966	0.05987736043918698	0.042339687606100226	47.511476514896586	1.0542024586187235	0.12864498355732235
11	sod2∆ 2E	RNS	2	0.4016477523216473	0.010413543776929981	0.007363487420850161	47.511476514896586	1.0542024586187235	0.12864498355732235
11	sod2∆ 2E	VAR1	2	-0.45615940132690014	0.04376847026260446	0.030948982124849363	47.511476514896586	1.0542024586187235	0.12864498355732235
5	sod2∆ 2E	ATP6	2	0.1362458476650979	0.06963994165714164	0.04924287498720039	20.182533257305277	1.2244741631361709	0.06952032737286179
5	sod2∆ 2E	ATP8	2	0.23379714299884757	0.009871455519402165	0.006980173137950643	20.182533257305277	1.2244741631361709	0.06952032737286179
5	sod2∆ 2E	COB	2	0.19199784518845142	0.024617141735920448	0.017406947854899726	20.182533257305277	1.2244741631361709	0.06952032737286179
5	sod2∆ 2E	COX1	2	0.14439520133144695	0.5889288134244156	0.4164355576085513	20.182533257305277	1.2244741631361709	0.06952032737286179
5	sod2∆ 2E	COX2	2	0.6606053895087989	0.05267413679034395	0.03724623931760001	20.182533257305277	1.2244741631361709	0.06952032737286179
5	sod2∆ 2E	COX3	2	0.45792655395154824	0.06798635817751796	0.04807361489550043	20.182533257305277	1.2244741631361709	0.06952032737286179
5	sod2∆ 2E	OLI1	2	0.4509361803144536	0.08022042568247491	0.056724406989749475	20.182533257305277	1.2244741631361709	0.06952032737286179
5	sod2∆ 2E	RNL	2	0.4913453253910465	0.07540625123864157	0.05332027159469995	20.182533257305277	1.2244741631361709	0.06952032737286179
5	sod2∆ 2E	RNS	2	0.46684160374325157	0.06631932145171693	0.046894841922199504	20.182533257305277	1.2244741631361709	0.06952032737286179
5	sod2∆ 2E	VAR1	2	0.3802550510584037	0.3097126093522416	0.21899988629195016	20.182533257305277	1.2244741631361709	0.06952032737286179
7	sod2∆ 2E	ATP6	2	-0.7618025452116015	0.47708665731576505	0.33735121060160006	28.512312875291787	1.2657555570153654	0.059257697194385624
7	sod2∆ 2E	ATP8	2	-0.14378272335445	0.025231483057214312	0.01784135276914972	28.512312875291787	1.2657555570153654	0.059257697194385624
7	sod2∆ 2E	COB	2	0.6282120851022999	0.6642904496636098	0.4697242816345994	28.512312875291787	1.2657555570153654	0.059257697194385624
7	sod2∆ 2E	COX1	2	0.27271552979249936	0.2791990037726227	0.19742350886814997	28.512312875291787	1.2657555570153654	0.059257697194385624
7	sod2∆ 2E	COX2	2	0.2603351194093957	0.042103375442026005	0.02977158228589974	28.512312875291787	1.2657555570153654	0.059257697194385624
7	sod2∆ 2E	COX3	2	0.38693555638960053	0.09224626510736514	0.0652279595965499	28.512312875291787	1.2657555570153654	0.059257697194385624
7	sod2∆ 2E	OLI1	2	0.4554828858452522	0.1265647850824231	0.08949481779119936	28.512312875291787	1.2657555570153654	0.059257697194385624
7	sod2∆ 2E	RNL	2	0.32031780756594935	0.06901352459838209	0.04879993123710057	28.512312875291787	1.2657555570153654	0.059257697194385624
7	sod2∆ 2E	RNS	2	0.35593529332839857	0.12881530087564114	0.09108617276975126	28.512312875291787	1.2657555570153654	0.059257697194385624
7	sod2∆ 2E	VAR1	2	0.7753907286001507	0.10060812743363012	0.07114068915080018	28.512312875291787	1.2657555570153654	0.059257697194385624
9	sod2∆ 2E	ATP6	2	-0.7380741353248492	0.08818126855256266	0.0623535729671491	37.71205237572787	0.876207620215269	0.13882117649043346
9	sod2∆ 2E	ATP8	2	-0.4993644227781502	0.04509927100428524	0.03189000035369993	37.71205237572787	0.876207620215269	0.13882117649043346
9	sod2∆ 2E	COB	2	-0.28510477774065107	0.06353679028846199	0.044927295267799046	37.71205237572787	0.876207620215269	0.13882117649043346
9	sod2∆ 2E	COX1	2	-0.6942625037208021	0.5909246574539136	0.417846832456	37.71205237572787	0.876207620215269	0.13882117649043346
9	sod2∆ 2E	COX2	2	0.40717342379224963	0.05245637679900113	0.03709225975105038	37.71205237572787	0.876207620215269	0.13882117649043346
9	sod2∆ 2E	COX3	2	0.3604845657661002	0.00399698778126195	0.0028262971644500974	37.71205237572787	0.876207620215269	0.13882117649043346
9	sod2∆ 2E	OLI1	2	0.007186071523150827	0.06877705855951842	0.04863272449749975	37.71205237572787	0.876207620215269	0.13882117649043346
9	sod2∆ 2E	RNL	2	0.10808343503189916	0.028075334210184637	0.01985225920410022	37.71205237572787	0.876207620215269	0.13882117649043346
9	sod2∆ 2E	RNS	2	0.14595028817380395	0.01810638577912809	0.012803148167201142	37.71205237572787	0.876207620215269	0.13882117649043346
9	sod2∆ 2E	VAR1	2	0.24146404490145207	0.008077479620921748	0.005711640614849911	37.71205237572787	0.876207620215269	0.13882117649043346
0	sod2∆ 2H	ATP6	2	1.1219071170809993	0.016758996708480085	0.011850400218449297	0	1.5425980007545164	0.04452299436733682
0	sod2∆ 2H	ATP8	2	0.7827133436877993	0.05636068646651217	0.03985302359279963	0	1.5425980007545164	0.04452299436733682
0	sod2∆ 2H	COB	2	1.1139561643334002	0.40605062804680064	0.28712115259694926	0	1.5425980007545164	0.04452299436733682
0	sod2∆ 2H	COX1	2	0.981857290127147	0.12254341070686199	0.08665127670055028	0	1.5425980007545164	0.04452299436733682
0	sod2∆ 2H	COX2	2	0.7261009745664442	0.13941043158458039	0.09857806154160002	0	1.5425980007545164	0.04452299436733682
0	sod2∆ 2H	COX3	2	0.9561521950552496	0.029115685813679685	0.020587898877749866	0	1.5425980007545164	0.04452299436733682
0	sod2∆ 2H	OLI1	2	1.076259164431396	0.13839964275371924	0.09786332590495049	0	1.5425980007545164	0.04452299436733682
0	sod2∆ 2H	RNL	2	0.7554002297775533	0.0158542352591899	0.011210637262300038	0	1.5425980007545164	0.04452299436733682
0	sod2∆ 2H	RNS	2	0.951154818150652	0.01287343492339985	0.009102893131499756	0	1.5425980007545164	0.04452299436733682
0	sod2∆ 2H	VAR1	2	0.6894932116478003	0.1474845667810636	0.10428733729125028	0	1.5425980007545164	0.04452299436733682
11	sod2∆ 2H	ATP6	2	-3.53025690686445	0.06365576457988509	0.045011422796051186	47.47958878847268	0.2828741541824944	0.08187961357701337
11	sod2∆ 2H	ATP8	2	-3.0175769957526963	0.0024708418415527182	0.0017471490214013838	47.47958878847268	0.2828741541824944	0.08187961357701337
11	sod2∆ 2H	COB	2	-2.351105421671001	0.04362901183790381	0.03085037012704994	47.47958878847268	0.2828741541824944	0.08187961357701337
11	sod2∆ 2H	COX1	2	-3.3035378297185023	0.0033488348724728754	0.002367983847399557	47.47958878847268	0.2828741541824944	0.08187961357701337
11	sod2∆ 2H	COX2	2	0.7087250008314969	0.05569736744634584	0.03938398621555	47.47958878847268	0.2828741541824944	0.08187961357701337
11	sod2∆ 2H	COX3	2	0.8171427973390983	0.05824857529584924	0.0411879625861502	47.47958878847268	0.2828741541824944	0.08187961357701337
11	sod2∆ 2H	OLI1	2	-1.324884766338501	0.004847851314263153	0.003427948538499592	47.47958878847268	0.2828741541824944	0.08187961357701337
11	sod2∆ 2H	RNL	2	-6.246884451189397	0.0447194329557086	0.03162141429379872	47.47958878847268	0.2828741541824944	0.08187961357701337
11	sod2∆ 2H	RNS	2	1.2706339979926025	0.17475088948941922	0.1235675389763493	47.47958878847268	0.2828741541824944	0.08187961357701337
11	sod2∆ 2H	VAR1	2	-1.6390288726723483	0.17388266010280615	0.12295360808944976	47.47958878847268	0.2828741541824944	0.08187961357701337
5	sod2∆ 2H	ATP6	2	1.3027190823644013	0.02890206298029797	0.020436844723649372	19.320937339520064	1.3674268270378767	0.06118145309426996
5	sod2∆ 2H	ATP8	2	1.5503896422370502	0.11998826315267135	0.08484451453804985	19.320937339520064	1.3674268270378767	0.06118145309426996
5	sod2∆ 2H	COB	2	1.1039424979919001	0.016990803595022193	0.012014312439848962	19.320937339520064	1.3674268270378767	0.06118145309426996
5	sod2∆ 2H	COX1	2	1.5509803997913476	0.12873255233297784	0.09102766071410073	19.320937339520064	1.3674268270378767	0.06118145309426996
5	sod2∆ 2H	COX2	2	1.7596800329227982	0.06850643121540013	0.04844136206729921	19.320937339520064	1.3674268270378767	0.06118145309426996
5	sod2∆ 2H	COX3	2	1.49110744168485	0.09629072292433255	0.06808782314515048	19.320937339520064	1.3674268270378767	0.06118145309426996
5	sod2∆ 2H	OLI1	2	1.6194076236948476	0.10757450987643993	0.07606666541644991	19.320937339520064	1.3674268270378767	0.06118145309426996
5	sod2∆ 2H	RNL	2	1.1453271475178521	0.027050950964722577	0.01912791086470011	19.320937339520064	1.3674268270378767	0.06118145309426996
5	sod2∆ 2H	RNS	2	1.868803194110102	0.19546415281391083	0.13821402793359994	19.320937339520064	1.3674268270378767	0.06118145309426996
5	sod2∆ 2H	VAR1	2	1.2609817106618024	0.05159463868990164	0.036482918890499254	19.320937339520064	1.3674268270378767	0.06118145309426996
7	sod2∆ 2H	ATP6	2	0.7851661318181469	0.07231156281778162	0.05113199642665039	27.761149484735462	1.252036651813958	0.03394188526915713
7	sod2∆ 2H	ATP8	2	0.8910116054250032	0.016255557652286663	0.011494415047900773	27.761149484735462	1.252036651813958	0.03394188526915713
7	sod2∆ 2H	COB	2	1.0781518845899987	0.0064716641883582095	0.004576157633150224	27.761149484735462	1.252036651813958	0.03394188526915713
7	sod2∆ 2H	COX1	2	0.16591260520580065	0.07775944336749965	0.05498422970645031	27.761149484735462	1.252036651813958	0.03394188526915713
7	sod2∆ 2H	COX2	2	1.2812490019857457	0.023255294071789247	0.016443976136649493	27.761149484735462	1.252036651813958	0.03394188526915713
7	sod2∆ 2H	COX3	2	1.3179250963625497	6.507745822743956e-4	4.601671201500679e-4	27.761149484735462	1.252036651813958	0.03394188526915713
7	sod2∆ 2H	OLI1	2	1.5935918538540959	0.024708594747007873	0.017471614899199572	27.761149484735462	1.252036651813958	0.03394188526915713
7	sod2∆ 2H	RNL	2	0.15334726669400386	0.04317685287343522	0.030530645457099912	27.761149484735462	1.252036651813958	0.03394188526915713
7	sod2∆ 2H	RNS	2	1.6749055707417524	0.09433098447828756	0.06670207880060008	27.761149484735462	1.252036651813958	0.03394188526915713
7	sod2∆ 2H	VAR1	2	0.5844659727958542	0.054251516555502054	0.03836161524604975	27.761149484735462	1.252036651813958	0.03394188526915713
9	sod2∆ 2H	ATP6	2	-0.046115816210800686	0.5147418260384713	0.3639774357521492	37.33491623473235	0.7521427709752494	0.03365147663423714
9	sod2∆ 2H	ATP8	2	-0.30750426928239716	0.009653406304271582	0.006825989059299403	37.33491623473235	0.7521427709752494	0.03365147663423714
9	sod2∆ 2H	COB	2	0.689336444095602	0.14100941860744964	0.09970871610850017	37.33491623473235	0.7521427709752494	0.03365147663423714
9	sod2∆ 2H	COX1	2	-1.0103862401855501	0.4831661492892213	0.34165006060220016	37.33491623473235	0.7521427709752494	0.03365147663423714
9	sod2∆ 2H	COX2	2	0.9353150442817953	0.008151603389133582	0.0057640540339995985	37.33491623473235	0.7521427709752494	0.03365147663423714
9	sod2∆ 2H	COX3	2	1.2361302191486487	0.11869935064596272	0.08393311576420004	37.33491623473235	0.7521427709752494	0.03365147663423714
9	sod2∆ 2H	OLI1	2	1.0109491096243461	0.0021928269269995446	0.0015505627900498362	37.33491623473235	0.7521427709752494	0.03365147663423714
9	sod2∆ 2H	RNL	2	-1.215419080541695	0.02169002595529201	0.015337164437099203	37.33491623473235	0.7521427709752494	0.03365147663423714
9	sod2∆ 2H	RNS	2	2.043727887202701	0.2503549226178993	0.17702766348654997	37.33491623473235	0.7521427709752494	0.03365147663423714
9	sod2∆ 2H	VAR1	2	0.4811749427682521	0.09872343012940497	0.06980800690649858	37.33491623473235	0.7521427709752494	0.03365147663423714
0	sod2∆ 3C	ATP6	2	1.2425608221591506	0.7261219841646429	0.5134457789714498	0	1.6257097880024507	0.04622817682962061
0	sod2∆ 3C	ATP8	2	0.44619212051085266	0.004534589758310189	0.003206439168000202	0	1.6257097880024507	0.04622817682962061
0	sod2∆ 3C	COB	2	1.8642142166743492	0.28297911860240055	0.2000964536979497	0	1.6257097880024507	0.04622817682962061
0	sod2∆ 3C	COX1	2	0.8919355850918009	0.7256778020272973	0.5131316947700508	0	1.6257097880024507	0.04622817682962061
0	sod2∆ 3C	COX2	2	0.8732425265044492	0.08059602314146719	0.05698999449999936	0	1.6257097880024507	0.04622817682962061
0	sod2∆ 3C	COX3	2	0.7043137344684487	0.061547002555076974	0.043520302868400695	0	1.6257097880024507	0.04622817682962061
0	sod2∆ 3C	OLI1	2	0.8290363747314977	0.09988175148403418	0.07062706379115007	0	1.6257097880024507	0.04622817682962061
0	sod2∆ 3C	RNL	2	0.08913857690615237	0.12149241124281498	0.08590810785249922	0	1.6257097880024507	0.04622817682962061
0	sod2∆ 3C	RNS	2	0.4305650353314511	0.09295190860467817	0.06572692489860013	0	1.6257097880024507	0.04622817682962061
0	sod2∆ 3C	VAR1	2	0.3698545992501039	0.057105427436846094	0.0403796349831502	0	1.6257097880024507	0.04622817682962061
11	sod2∆ 3C	ATP6	2	-0.669358150938649	0.04770695785040006	0.03373391340579868	47.09698198842885	0.7576808378185605	0.0865336028926487
11	sod2∆ 3C	ATP8	2	-0.6729995771324493	0.035935856672256315	0.025410487940700277	47.09698198842885	0.7576808378185605	0.0865336028926487
11	sod2∆ 3C	COB	2	-1.5382670446215503	0.03156142244372435	0.02231729583385078	47.09698198842885	0.7576808378185605	0.0865336028926487
11	sod2∆ 3C	COX1	2	-1.494538368656249	0.10445944663987303	0.07386398307804853	47.09698198842885	0.7576808378185605	0.0865336028926487
11	sod2∆ 3C	COX2	2	-2.119469854876403	0.03994766783773404	0.028247266820649486	47.09698198842885	0.7576808378185605	0.0865336028926487
11	sod2∆ 3C	COX3	2	-2.024440773916499	0.029769906007444273	0.02105050241314998	47.09698198842885	0.7576808378185605	0.0865336028926487
11	sod2∆ 3C	OLI1	2	-1.5468695933826027	0.10865568492416901	0.07683117162434883	47.09698198842885	0.7576808378185605	0.0865336028926487
11	sod2∆ 3C	RNL	2	-2.3470935637039467	0.007608308404175208	0.005379886465950889	47.09698198842885	0.7576808378185605	0.0865336028926487
11	sod2∆ 3C	RNS	2	1.9870820162281007	0.054926896502006106	0.038839180986100175	47.09698198842885	0.7576808378185605	0.0865336028926487
11	sod2∆ 3C	VAR1	2	-1.8919701111315472	0.1300724762893829	0.09197513002994906	47.09698198842885	0.7576808378185605	0.0865336028926487
5	sod2∆ 3C	ATP6	2	0.45390237815690065	0.03184899715055831	0.02252064185915081	18.74778314161243	1.3254649143561088	0.09605169603084593
5	sod2∆ 3C	ATP8	2	0.6169389410087032	0.12743121866989685	0.09010747885634983	18.74778314161243	1.3254649143561088	0.09605169603084593
5	sod2∆ 3C	COB	2	0.5993586861811	0.038645255268371745	0.02732632206095081	18.74778314161243	1.3254649143561088	0.09605169603084593
5	sod2∆ 3C	COX1	2	1.0084384865211522	0.029328073736049225	0.02073807981789949	18.74778314161243	1.3254649143561088	0.09605169603084593
5	sod2∆ 3C	COX2	2	0.7624634168544473	0.01110212461352234	0.007850387599799724	18.74778314161243	1.3254649143561088	0.09605169603084593
5	sod2∆ 3C	COX3	2	0.5917863131040004	0.028604752828859117	0.02022661469945136	18.74778314161243	1.3254649143561088	0.09605169603084593
5	sod2∆ 3C	OLI1	2	0.7312434339916988	0.00782905230969332	0.005535975978448348	18.74778314161243	1.3254649143561088	0.09605169603084593
5	sod2∆ 3C	RNL	2	0.5808097653258031	0.14268032803320344	0.1008902274941992	18.74778314161243	1.3254649143561088	0.09605169603084593
5	sod2∆ 3C	RNS	2	1.0067425992688506	0.0349689868788362	0.024726807753248477	18.74778314161243	1.3254649143561088	0.09605169603084593
5	sod2∆ 3C	VAR1	2	0.4956698377364521	0.05120139012540256	0.03620485016385008	18.74778314161243	1.3254649143561088	0.09605169603084593
7	sod2∆ 3C	ATP6	2	0.5582175567505487	0.0014296576362271072	0.0010109206093513179	27.179313730767262	1.2810344841180072	0.07811392492740227
7	sod2∆ 3C	ATP8	2	0.5736134339525005	0.009590168858474642	0.00678127343255147	27.179313730767262	1.2810344841180072	0.07811392492740227
7	sod2∆ 3C	COB	2	0.6319188341644981	0.05903850559974648	0.041746527660700694	27.179313730767262	1.2810344841180072	0.07811392492740227
7	sod2∆ 3C	COX1	2	0.5266548779995511	0.7424214920790774	0.5249712715477503	27.179313730767262	1.2810344841180072	0.07811392492740227
7	sod2∆ 3C	COX2	2	0.41689582303419753	0.028836092448419105	0.020390196513199343	27.179313730767262	1.2810344841180072	0.07811392492740227
7	sod2∆ 3C	COX3	2	0.4314304224984511	0.06868790379792	0.048569682560998445	27.179313730767262	1.2810344841180072	0.07811392492740227
7	sod2∆ 3C	OLI1	2	0.9389687298963967	0.029036752610045673	0.020532084674199477	27.179313730767262	1.2810344841180072	0.07811392492740227
7	sod2∆ 3C	RNL	2	0.2912468528161529	0.054024208248996605	0.038200884001099715	27.179313730767262	1.2810344841180072	0.07811392492740227
7	sod2∆ 3C	RNS	2	1.9057214785245478	0.020687710280196794	0.014628420226349803	27.179313730767262	1.2810344841180072	0.07811392492740227
7	sod2∆ 3C	VAR1	2	0.920808589417554	0.25841659554654084	0.1827281270821004	27.179313730767262	1.2810344841180072	0.07811392492740227
9	sod2∆ 3C	ATP6	2	0.1365799775883971	0.14113482131346144	0.09979738921230026	36.27584909833739	0.9479341309785528	0.17759354352206083
9	sod2∆ 3C	ATP8	2	-0.17812373511729795	0.20791533171474821	0.1470183409681489	36.27584909833739	0.9479341309785528	0.17759354352206083
9	sod2∆ 3C	COB	2	-0.5493255575102012	0.43527825022279254	0.30778820243555144	36.27584909833739	0.9479341309785528	0.17759354352206083
9	sod2∆ 3C	COX1	2	-0.07253150651649953	1.0895985047017793	0.7704624914453504	36.27584909833739	0.9479341309785528	0.17759354352206083
9	sod2∆ 3C	COX2	2	-0.7950699433197013	0.0853740512051076	0.06036857054449912	36.27584909833739	0.9479341309785528	0.17759354352206083
9	sod2∆ 3C	COX3	2	0.36899445191780345	0.606436249286966	0.42881518422814924	36.27584909833739	0.9479341309785528	0.17759354352206083
9	sod2∆ 3C	OLI1	2	1.3333467113113944	1.1652164222301258	0.8239324337088493	36.27584909833739	0.9479341309785528	0.17759354352206083
9	sod2∆ 3C	RNL	2	-1.4115992454278494	0.7456196932623619	0.5272327412920496	36.27584909833739	0.9479341309785528	0.17759354352206083
9	sod2∆ 3C	RNS	2	1.9358005735989021	0.9237434989553982	0.6531852921883505	36.27584909833739	0.9479341309785528	0.17759354352206083
9	sod2∆ 3C	VAR1	2	-0.4457585093636975	0.0021606223677238215	0.0015277907278008485	36.27584909833739	0.9479341309785528	0.17759354352206083
0	sod2∆ 4E	ATP6	2	1.6384457719241503	0.11069577217150127	0.07827373115114966	0	1.690893619547283	0.04566952135075513
0	sod2∆ 4E	ATP8	2	1.7537178092244492	0.2756737468377145	0.19493077578405146	0	1.690893619547283	0.04566952135075513
0	sod2∆ 4E	COB	2	1.5585074163178998	0.11553400309846182	0.08169487704854994	0	1.690893619547283	0.04566952135075513
0	sod2∆ 4E	COX1	2	1.5425617420529	0.37808542259477984	0.26734676618455033	0	1.690893619547283	0.04566952135075513
0	sod2∆ 4E	COX2	2	1.8172436407442492	0.07618335896334441	0.05386976973654978	0	1.690893619547283	0.04566952135075513
0	sod2∆ 4E	COX3	2	1.5589200999605985	0.6476956256306567	0.45798996902830075	0	1.690893619547283	0.04566952135075513
0	sod2∆ 4E	OLI1	2	1.8301312075136016	0.1573329506081342	0.11125119627909984	0	1.690893619547283	0.04566952135075513
0	sod2∆ 4E	RNL	2	1.7790375113484522	0.05671580165644045	0.040104127951700264	0	1.690893619547283	0.04566952135075513
0	sod2∆ 4E	RNS	2	1.593339837429351	0.3383553512273992	0.23925336330364996	0	1.690893619547283	0.04566952135075513
0	sod2∆ 4E	VAR1	2	1.31003656421675	0.9483212562750027	0.6705643910554002	0	1.690893619547283	0.04566952135075513
11	sod2∆ 4E	ATP6	2	0.28623392062810094	0.20468501947864595	0.1447341652806511	44.855748480400614	0.525946421909696	0.12138128125889305
11	sod2∆ 4E	ATP8	2	0.04393298172984565	0.017130938311146635	0.012113402647900206	44.855748480400614	0.525946421909696	0.12138128125889305
11	sod2∆ 4E	COB	2	0.9497395485002986	0.015439514813137448	0.01091738562259964	44.855748480400614	0.525946421909696	0.12138128125889305
11	sod2∆ 4E	COX1	2	-0.6048103913556506	0.040109073633981224	0.028361397953698683	44.855748480400614	0.525946421909696	0.12138128125889305
11	sod2∆ 4E	COX2	2	0.954356055254447	0.04265316871843502	0.030160344839899322	44.855748480400614	0.525946421909696	0.12138128125889305
11	sod2∆ 4E	COX3	2	0.9563303920440003	0.2856953128323267	0.20201709305695026	44.855748480400614	0.525946421909696	0.12138128125889305
11	sod2∆ 4E	OLI1	2	1.1730094581006512	0.1120621155680085	0.07923988183224938	44.855748480400614	0.525946421909696	0.12138128125889305
11	sod2∆ 4E	RNL	2	0.135971015025401	0.03797873942070931	0.026855024185300405	44.855748480400614	0.525946421909696	0.12138128125889305
11	sod2∆ 4E	RNS	2	0.6795479734903012	0.1695434813177421	0.11988534534575017	44.855748480400614	0.525946421909696	0.12138128125889305
11	sod2∆ 4E	VAR1	2	0.6329444655064513	0.07554796363430342	0.05342047739065064	44.855748480400614	0.525946421909696	0.12138128125889305
5	sod2∆ 4E	ATP6	2	0.3798237819773984	0.006728389529608946	0.00475768986285105	18.03142892649909	1.4368090131330682	0.04589946645329452
5	sod2∆ 4E	ATP8	2	0.9166964128645994	0.0019210536947060683	0.0013583900945501324	18.03142892649909	1.4368090131330682	0.04589946645329452
5	sod2∆ 4E	COB	2	1.1678877904092513	0.23495308288264036	0.16613691816699994	18.03142892649909	1.4368090131330682	0.04589946645329452
5	sod2∆ 4E	COX1	2	0.4755095279223483	0.5361321495057698	0.37910267852764973	18.03142892649909	1.4368090131330682	0.04589946645329452
5	sod2∆ 4E	COX2	2	1.6606931878606455	0.01172518395593309	0.008290957085899997	18.03142892649909	1.4368090131330682	0.04589946645329452
5	sod2∆ 4E	COX3	2	1.5096960216610498	0.012067872721189478	0.008533274635649233	18.03142892649909	1.4368090131330682	0.04589946645329452
5	sod2∆ 4E	OLI1	2	0.8841655636944505	0.04595738308161953	0.03249677722260108	18.03142892649909	1.4368090131330682	0.04589946645329452
5	sod2∆ 4E	RNL	2	0.841297860796649	0.08170356544913066	0.05777314517619919	18.03142892649909	1.4368090131330682	0.04589946645329452
5	sod2∆ 4E	RNS	2	0.9280342743918499	0.03923867297749769	0.02774593174714995	18.03142892649909	1.4368090131330682	0.04589946645329452
5	sod2∆ 4E	VAR1	2	0.934820059634152	0.04088177787489647	0.028907782362301456	18.03142892649909	1.4368090131330682	0.04589946645329452
7	sod2∆ 4E	ATP6	2	-0.282095562892403	0.0040981071217243495	0.0028977993358001715	25.47976879147658	1.470881621919848	0.05767376745344484
7	sod2∆ 4E	ATP8	2	-1.88346517975795	0.013224786420528632	0.0093513361576995635	25.47976879147658	1.470881621919848	0.05767376745344484
7	sod2∆ 4E	COB	2	0.8271794249243989	0.03296080044783378	0.023306805509999858	25.47976879147658	1.470881621919848	0.05767376745344484
7	sod2∆ 4E	COX1	2	-2.278744327603304	0.1348918086872167	0.09538291264924936	25.47976879147658	1.470881621919848	0.05767376745344484
7	sod2∆ 4E	COX2	2	0.5467538122966963	0.008704608860662946	0.006155087952951276	25.47976879147658	1.470881621919848	0.05767376745344484
7	sod2∆ 4E	COX3	2	0.4492136491499981	0.0340407513135551	0.024070446090499683	25.47976879147658	1.470881621919848	0.05767376745344484
7	sod2∆ 4E	OLI1	2	1.289718936483653	0.05054194040089716	0.03573854879180072	25.47976879147658	1.470881621919848	0.05767376745344484
7	sod2∆ 4E	RNL	2	-1.8495441677338995	0.026658307648623956	0.018850270113299206	25.47976879147658	1.470881621919848	0.05767376745344484
7	sod2∆ 4E	RNS	2	-0.31760217746529834	0.006968824479706856	0.004927703046499531	25.47976879147658	1.470881621919848	0.05767376745344484
7	sod2∆ 4E	VAR1	2	1.1922050192084035	0.1707866279893452	0.12076438278725021	25.47976879147658	1.470881621919848	0.05767376745344484
9	sod2∆ 4E	ATP6	2	0.11787479837259876	0.25996047550137197	0.18381981506749948	34.14796688665761	0.9593761470814073	0.13762345119312333
9	sod2∆ 4E	ATP8	2	-1.25116343355975	0.17920834712383868	0.12671943749649905	34.14796688665761	0.9593761470814073	0.13762345119312333
9	sod2∆ 4E	COB	2	0.7598801104252022	0.061394976264123595	0.043412804047148916	34.14796688665761	0.9593761470814073	0.13762345119312333
9	sod2∆ 4E	COX1	2	-1.4240864466086034	0.0707297974874116	0.05001351943529997	34.14796688665761	0.9593761470814073	0.13762345119312333
9	sod2∆ 4E	COX2	2	-0.01820328511110242	0.19526799180812018	0.138075321156201	34.14796688665761	0.9593761470814073	0.13762345119312333
9	sod2∆ 4E	COX3	2	-0.08270323833344932	0.04769887703078335	0.033728199403450156	34.14796688665761	0.9593761470814073	0.13762345119312333
9	sod2∆ 4E	OLI1	2	2.0506663268745013	0.5538635846540241	0.3916406965611498	34.14796688665761	0.9593761470814073	0.13762345119312333
9	sod2∆ 4E	RNL	2	-2.4441052344298004	0.7597106526532205	0.53719655423075	34.14796688665761	0.9593761470814073	0.13762345119312333
9	sod2∆ 4E	RNS	2	0.4583965697981523	0.07999304025840888	0.05656362121444941	34.14796688665761	0.9593761470814073	0.13762345119312333
9	sod2∆ 4E	VAR1	2	1.7491303425985034	0.062351637126529066	0.0440892654302516	34.14796688665761	0.9593761470814073	0.13762345119312333
0	sod2∆ 5H	ATP6	2	1.0411807782623015	0.017190014525181728	0.012155175839451249	0	1.5529805328421207	0.042551893391254314
0	sod2∆ 5H	ATP8	2	1.073167175129651	0.05408150203025664	0.038241396822348506	0	1.5529805328421207	0.042551893391254314
0	sod2∆ 5H	COB	2	1.118668741803896	0.0210636341815401	0.014894238566199758	0	1.5529805328421207	0.042551893391254314
0	sod2∆ 5H	COX1	2	1.5897440965181975	0.08387629087119834	0.059309494055799654	0	1.5529805328421207	0.042551893391254314
0	sod2∆ 5H	COX2	2	1.5467184084867949	0.2454209774574585	0.17353883740559972	0	1.5529805328421207	0.042551893391254314
0	sod2∆ 5H	COX3	2	1.007849270076001	0.052522628170145115	0.0371391065448492	0	1.5529805328421207	0.042551893391254314
0	sod2∆ 5H	OLI1	2	1.0576980594210479	0.049221918923612	0.034805152653900495	0	1.5529805328421207	0.042551893391254314
0	sod2∆ 5H	RNL	2	0.8755559193538041	0.059209074015590044	0.04186713774419992	0	1.5529805328421207	0.042551893391254314
0	sod2∆ 5H	RNS	2	1.0540845016934028	0.10325881200252349	0.07301500618425122	0	1.5529805328421207	0.042551893391254314
0	sod2∆ 5H	VAR1	2	0.1213790652730519	0.14140330972299475	0.09998723918735125	0	1.5529805328421207	0.042551893391254314
11	sod2∆ 5H	ATP6	2	-12.4796944708257	0	0	51.46771772606904	0.283538928510231	0.12154036201181868
11	sod2∆ 5H	ATP8	2	-11.71875566994555	0	0	51.46771772606904	0.283538928510231	0.12154036201181868
11	sod2∆ 5H	COB	2	-11.749564136346253	0	0	51.46771772606904	0.283538928510231	0.12154036201181868
11	sod2∆ 5H	COX1	2	-11.216471525477052	0	0	51.46771772606904	0.283538928510231	0.12154036201181868
11	sod2∆ 5H	COX2	2	-8.273549363680102	0.05241467596436888	0.037062772808100775	51.46771772606904	0.283538928510231	0.12154036201181868
11	sod2∆ 5H	COX3	2	-6.789543795206804	0.01593743965768418	0.01126947165669989	51.46771772606904	0.283538928510231	0.12154036201181868
11	sod2∆ 5H	OLI1	2	1.6558777124513968	0.10177268337441535	0.07196415455360049	51.46771772606904	0.283538928510231	0.12154036201181868
11	sod2∆ 5H	RNL	2	1.412678427381855	0.026053032411790116	0.018422275888849704	51.46771772606904	0.283538928510231	0.12154036201181868
11	sod2∆ 5H	RNS	2	-8.218939291072049	0.00309815189881648	0.0021907242167991114	51.46771772606904	0.283538928510231	0.12154036201181868
11	sod2∆ 5H	VAR1	2	1.531165693423855	0.3070338468668618	0.21710571517334998	51.46771772606904	0.283538928510231	0.12154036201181868
5	sod2∆ 5H	ATP6	2	0.6229047508410481	0.08400263800642152	0.05939883497189946	19.27493546139772	1.2764035636789033	0.13016710274789883
5	sod2∆ 5H	ATP8	2	0.8304692686870503	0.04692590905240683	0.033181628504300065	19.27493546139772	1.2764035636789033	0.13016710274789883
5	sod2∆ 5H	COB	2	0.7680020268744503	0.012131276320609148	0.008578107750750517	19.27493546139772	1.2764035636789033	0.13016710274789883
5	sod2∆ 5H	COX1	2	0.9105807931930023	0.09131346633050544	0.06456837125594989	19.27493546139772	1.2764035636789033	0.13016710274789883
5	sod2∆ 5H	COX2	2	1.565817560123147	0.001113558760288626	7.874049506497726e-4	19.27493546139772	1.2764035636789033	0.13016710274789883
5	sod2∆ 5H	COX3	2	1.6407073953650961	0.021311974565513737	0.015069841735749987	19.27493546139772	1.2764035636789033	0.13016710274789883
5	sod2∆ 5H	OLI1	2	1.4634416129413452	0.06016120804373604	0.042540398172100424	19.27493546139772	1.2764035636789033	0.13016710274789883
5	sod2∆ 5H	RNL	2	1.245036082843253	0.17811339654735114	0.1259451905188006	19.27493546139772	1.2764035636789033	0.13016710274789883
5	sod2∆ 5H	RNS	2	1.1947277558059497	0.013597958030843649	0.009615208333899616	19.27493546139772	1.2764035636789033	0.13016710274789883
5	sod2∆ 5H	VAR1	2	1.0135656707402525	0.04636595509865508	0.032785681266449984	19.27493546139772	1.2764035636789033	0.13016710274789883
7	sod2∆ 5H	ATP6	2	-2.55892243775455	0.19336549103116113	0.13673004995560056	28.577856620898956	0.9185333276834482	0.11704053927046877
7	sod2∆ 5H	ATP8	2	-3.523424030736699	0.03020392675199756	0.021357401424799246	28.577856620898956	0.9185333276834482	0.11704053927046877
7	sod2∆ 5H	COB	2	-5.078121716551301	0.02506009694966596	0.017720164490301116	28.577856620898956	0.9185333276834482	0.11704053927046877
7	sod2∆ 5H	COX1	2	-2.4622157989777502	1.5897144708527307	1.12409788249035	28.577856620898956	0.9185333276834482	0.11704053927046877
7	sod2∆ 5H	COX2	2	-0.9558781193871546	0.494341509347555	0.3495522334816492	28.577856620898956	0.9185333276834482	0.11704053927046877
7	sod2∆ 5H	COX3	2	-1.2171933901460026	0.9875122489461493	0.6982766077346002	28.577856620898956	0.9185333276834482	0.11704053927046877
7	sod2∆ 5H	OLI1	2	1.4497034169166483	0.06843756171089851	0.04839266397364916	28.577856620898956	0.9185333276834482	0.11704053927046877
7	sod2∆ 5H	RNL	2	0.9573905464598536	0.1721891284813297	0.12175610039574991	28.577856620898956	0.9185333276834482	0.11704053927046877
7	sod2∆ 5H	RNS	2	-0.47211883639354835	0.08618049214956355	0.06093881040495041	28.577856620898956	0.9185333276834482	0.11704053927046877
7	sod2∆ 5H	VAR1	2	0.20416135983985476	0.07469576785711078	0.05281788397769918	28.577856620898956	0.9185333276834482	0.11704053927046877
9	sod2∆ 5H	ATP6	2	-9.81348772593915	0.07226446285885642	0.05109869172630077	38.769094596384726	0.45657402363649385	0.06066647840679417
9	sod2∆ 5H	ATP8	2	-9.827321887886347	0.018227312483726475	0.012888656260049201	38.769094596384726	0.45657402363649385	0.06066647840679417
9	sod2∆ 5H	COB	2	-8.891468515695848	0.03998683794405618	0.028274964268449665	38.769094596384726	0.45657402363649385	0.06066647840679417
9	sod2∆ 5H	COX1	2	-7.970040206820551	4.03924655621997	2.8561786307875496	38.769094596384726	0.45657402363649385	0.06066647840679417
9	sod2∆ 5H	COX2	2	-5.046432704013604	0.01829170309347849	0.012934187296849586	38.769094596384726	0.45657402363649385	0.06066647840679417
9	sod2∆ 5H	COX3	2	-3.496612200207551	0.023947644766232158	0.01693354200764929	38.769094596384726	0.45657402363649385	0.06066647840679417
9	sod2∆ 5H	OLI1	2	1.437114974260349	0.025539969624100073	0.0180594857124996	38.769094596384726	0.45657402363649385	0.06066647840679417
9	sod2∆ 5H	RNL	2	1.4123011834761554	0.016378499624859637	0.011581348150399573	38.769094596384726	0.45657402363649385	0.06066647840679417
9	sod2∆ 5H	RNS	2	-5.959390592588798	0.0360826272532519	0.025514270413800944	38.769094596384726	0.45657402363649385	0.06066647840679417
9	sod2∆ 5H	VAR1	2	1.427494242936005	0.00364449508584295	0.0025770471892005986	38.769094596384726	0.45657402363649385	0.06066647840679417
0	sod2∆ 7E	ATP6	2	1.404121973613048	0.07060170568599	0.04992294485390036	0	1.7203791676049518	0.07744869754649034
0	sod2∆ 7E	ATP8	2	2.5087779544002498	0.022061398863724702	0.01559976473900093	0	1.7203791676049518	0.07744869754649034
0	sod2∆ 7E	COB	2	1.5564441719148991	0.07491545383252898	0.05297322542064897	0	1.7203791676049518	0.07744869754649034
0	sod2∆ 7E	COX1	2	2.4008438943396513	0.033472265498266346	0.023668465915500644	0	1.7203791676049518	0.07744869754649034
0	sod2∆ 7E	COX2	2	1.908120734054794	0.14093471250088305	0.09965589091395088	0	1.7203791676049518	0.07744869754649034
0	sod2∆ 7E	COX3	2	1.6637020659094492	0.15466914373608354	0.10936760037610148	0	1.7203791676049518	0.07744869754649034
0	sod2∆ 7E	OLI1	2	1.767490300683054	0.005998482590187119	0.004241567716350758	0	1.7203791676049518	0.07744869754649034
0	sod2∆ 7E	RNL	2	2.4210897335969506	0.18325780200778877	0.12958283450504912	0	1.7203791676049518	0.07744869754649034
0	sod2∆ 7E	RNS	2	1.5506423127601536	0.1700414708718207	0.1202374771363992	0	1.7203791676049518	0.07744869754649034
0	sod2∆ 7E	VAR1	2	1.7849695568318502	0.37547503257277665	0.2655009416984502	0	1.7203791676049518	0.07744869754649034
11	sod2∆ 7E	ATP6	2	-10.794572359634003	0	0	43.450440989907655	0.6010171073473873	0.07831915124485132
11	sod2∆ 7E	ATP8	2	-10.054320263696903	0	0	43.450440989907655	0.6010171073473873	0.07831915124485132
11	sod2∆ 7E	COB	2	3.7269622627761514	0.30011458702481947	0.21221305961825007	43.450440989907655	0.6010171073473873	0.07831915124485132
11	sod2∆ 7E	COX1	2	-9.785558863585303	0	0	43.450440989907655	0.6010171073473873	0.07831915124485132
11	sod2∆ 7E	COX2	2	-10.64871088818135	0.11156075783409791	0.07888536837880089	43.450440989907655	0.6010171073473873	0.07831915124485132
11	sod2∆ 7E	COX3	2	-9.951603954987199	0	0	43.450440989907655	0.6010171073473873	0.07831915124485132
11	sod2∆ 7E	OLI1	2	3.718635314932153	0.7061735038770829	0.49934007328575	43.450440989907655	0.6010171073473873	0.07831915124485132
11	sod2∆ 7E	RNL	2	-10.554042057070202	0.18052336438338096	0.12764929511809875	43.450440989907655	0.6010171073473873	0.07831915124485132
11	sod2∆ 7E	RNS	2	-10.509551546735752	0.070780362055099	0.05004927398399949	43.450440989907655	0.6010171073473873	0.07831915124485132
11	sod2∆ 7E	VAR1	2	3.41752238772065	0.08932171158840443	0.06315998797134979	43.450440989907655	0.6010171073473873	0.07831915124485132
5	sod2∆ 7E	ATP6	2	0.40421071329619634	0.009705799962114119	0.0068630369700510285	17.76588896945035	1.572812591510768	0.06572922421582497
5	sod2∆ 7E	ATP8	2	0.6635783892994951	0.07417285734304739	0.052448130407251214	17.76588896945035	1.572812591510768	0.06572922421582497
5	sod2∆ 7E	COB	2	1.9002524049797511	0.2699740221465748	0.19090046180405018	17.76588896945035	1.572812591510768	0.06572922421582497
5	sod2∆ 7E	COX1	2	1.3290041606661998	0.0571798761732314	0.040432278189499016	17.76588896945035	1.572812591510768	0.06572922421582497
5	sod2∆ 7E	COX2	2	1.277333252684496	0.017932533420515727	0.012680215985501064	17.76588896945035	1.572812591510768	0.06572922421582497
5	sod2∆ 7E	COX3	2	0.804118590413653	0.11680377591989306	0.08259274202115034	17.76588896945035	1.572812591510768	0.06572922421582497
5	sod2∆ 7E	OLI1	2	1.9778362040125526	0.0459218427854161	0.03247164643815025	17.76588896945035	1.572812591510768	0.06572922421582497
5	sod2∆ 7E	RNL	2	0.8806570801131509	0.19639007960738908	0.13886875704815071	17.76588896945035	1.572812591510768	0.06572922421582497
5	sod2∆ 7E	RNS	2	1.0791175886339985	0.14092793197539755	0.09965109635840008	17.76588896945035	1.572812591510768	0.06572922421582497
5	sod2∆ 7E	VAR1	2	2.0435336050040522	0.3535032325123522	0.24996453288084905	17.76588896945035	1.572812591510768	0.06572922421582497
7	sod2∆ 7E	ATP6	2	-0.08090408653234948	0.6751702918314936	0.47741749180974935	24.915342351447507	1.412663406221469	0.06131580348678933
7	sod2∆ 7E	ATP8	2	0.14115340052359926	0.5149174308738437	0.36410160712205014	24.915342351447507	1.412663406221469	0.06131580348678933
7	sod2∆ 7E	COB	2	2.1116620828512005	0.2605402984270025	0.18422981179010023	24.915342351447507	1.412663406221469	0.06131580348678933
7	sod2∆ 7E	COX1	2	-0.37733020758995295	0.701506529017909	0.496040023715201	24.915342351447507	1.412663406221469	0.06131580348678933
7	sod2∆ 7E	COX2	2	0.008348202125148502	0.06695200354231931	0.047342215718799735	24.915342351447507	1.412663406221469	0.06131580348678933
7	sod2∆ 7E	COX3	2	0.17604232227184907	0.8363420391874757	0.5913831273008493	24.915342351447507	1.412663406221469	0.06131580348678933
7	sod2∆ 7E	OLI1	2	2.5760022273098517	0.04455952862837377	0.03150834485959919	24.915342351447507	1.412663406221469	0.06131580348678933
7	sod2∆ 7E	RNL	2	-0.34162649609230294	0.05458439537227058	0.03859699611470013	24.915342351447507	1.412663406221469	0.06131580348678933
7	sod2∆ 7E	RNS	2	0.8545047125707512	0.4061482263417647	0.28719016501315053	24.915342351447507	1.412663406221469	0.06131580348678933
7	sod2∆ 7E	VAR1	2	2.3798713513728504	0.06815888082847445	0.048195606831900044	24.915342351447507	1.412663406221469	0.06131580348678933
9	sod2∆ 7E	ATP6	2	-6.808989602232906	0.02737022903354606	0.019353674552249345	33.68251013587892	0.9496549821626546	0.14010155647986144
9	sod2∆ 7E	ATP8	2	-6.866019183446303	0.1185323957182326	0.08381506080264955	33.68251013587892	0.9496549821626546	0.14010155647986144
9	sod2∆ 7E	COB	2	2.867813211923849	0.5486015565247561	0.38791988078815004	33.68251013587892	0.9496549821626546	0.14010155647986144
9	sod2∆ 7E	COX1	2	-7.570280891834699	0.058474739248105694	0.041347884650450695	33.68251013587892	0.9496549821626546	0.14010155647986144
9	sod2∆ 7E	COX2	2	-5.214120909430452	0.021455997996006684	0.0151716816801013	33.68251013587892	0.9496549821626546	0.14010155647986144
9	sod2∆ 7E	COX3	2	-5.014231136922799	0.08736288873978836	0.06177489105195022	33.68251013587892	0.9496549821626546	0.14010155647986144
9	sod2∆ 7E	OLI1	2	2.816763672221204	0.3493408981701322	0.24702131804189964	33.68251013587892	0.9496549821626546	0.14010155647986144
9	sod2∆ 7E	RNL	2	-5.6861828466388005	0.10977652966931849	0.07762372854430133	33.68251013587892	0.9496549821626546	0.14010155647986144
9	sod2∆ 7E	RNS	2	-4.2527241055656475	0.029102703141832918	0.020578718742449098	33.68251013587892	0.9496549821626546	0.14010155647986144
9	sod2∆ 7E	VAR1	2	2.6596108698013996	0.10907511804281987	0.07712775562680106	33.68251013587892	0.9496549821626546	0.14010155647986144
0	sod2∆ 8E	ATP6	2	0.9491753098127482	0.05377968353610998	0.03802797891844989	0	1.6806526190505349	0.06220113867287205
0	sod2∆ 8E	ATP8	2	1.0997687587582998	0.010930463059666171	0.007729004550999007	0	1.6806526190505349	0.06220113867287205
0	sod2∆ 8E	COB	2	1.0636592452892515	0.0826077661246332	0.0584125116054005	0	1.6806526190505349	0.06220113867287205
0	sod2∆ 8E	COX1	2	0.7133194900599467	0.1280196344254377	0.09052355162724977	0	1.6806526190505349	0.06220113867287205
0	sod2∆ 8E	COX2	2	1.1934690794054479	0.02559539831492054	0.018098679715651045	0	1.6806526190505349	0.06220113867287205
0	sod2∆ 8E	COX3	2	1.1169708811864467	0.10628224703161612	0.07515289759579957	0	1.6806526190505349	0.06220113867287205
0	sod2∆ 8E	OLI1	2	1.029613608918602	0.005639662232072847	0.003987843407900371	0	1.6806526190505349	0.06220113867287205
0	sod2∆ 8E	RNL	2	1.2165138051900009	0.040122291215116054	0.028370744194950004	0	1.6806526190505349	0.06220113867287205
0	sod2∆ 8E	RNS	2	1.2881284740732024	0.008487484639986057	0.006001557944150804	0	1.6806526190505349	0.06220113867287205
0	sod2∆ 8E	VAR1	2	1.0420552445828033	0.047612060189349784	0.03366681062615129	0	1.6806526190505349	0.06220113867287205
11	sod2∆ 8E	ATP6	2	-11.6808733954825	0	0	50.77442807503845	0.3277541586916974	0.2297174750481172
11	sod2∆ 8E	ATP8	2	-10.600597903479754	0	0	50.77442807503845	0.3277541586916974	0.2297174750481172
11	sod2∆ 8E	COB	2	-10.5531004296611	0	0	50.77442807503845	0.3277541586916974	0.2297174750481172
11	sod2∆ 8E	COX1	2	-10.637023933089951	0	0	50.77442807503845	0.3277541586916974	0.2297174750481172
11	sod2∆ 8E	COX2	2	-3.898902309792101	0.002741238166600124	0.0019383480964503264	50.77442807503845	0.3277541586916974	0.2297174750481172
11	sod2∆ 8E	COX3	2	1.6218195016474013	0.13582723094252355	0.09604435606924966	50.77442807503845	0.3277541586916974	0.2297174750481172
11	sod2∆ 8E	OLI1	2	-11.814652185116048	0	0	50.77442807503845	0.3277541586916974	0.2297174750481172
11	sod2∆ 8E	RNL	2	-3.6205444497092003	0.027410793049353073	0.01938235764289864	50.77442807503845	0.3277541586916974	0.2297174750481172
11	sod2∆ 8E	RNS	2	-10.8574538500161	0	0	50.77442807503845	0.3277541586916974	0.2297174750481172
11	sod2∆ 8E	VAR1	2	-10.090487439177698	0	0	50.77442807503845	0.3277541586916974	0.2297174750481172
5	sod2∆ 8E	ATP6	2	-2.0129978625181515	0.15104253760412356	0.10680320258749987	17.482953145685435	1.4945682987717295	0.0680566652925578
5	sod2∆ 8E	ATP8	2	-1.777517653138604	5.721823899366792e-4	4.045940479997512e-4	17.482953145685435	1.4945682987717295	0.0680566652925578
5	sod2∆ 8E	COB	2	-1.6979016579271988	0.015791095913354914	0.011165991002700437	17.482953145685435	1.4945682987717295	0.0680566652925578
5	sod2∆ 8E	COX1	2	-1.2389930030346523	1.0932905900895336	0.7730731900597512	17.482953145685435	1.4945682987717295	0.0680566652925578
5	sod2∆ 8E	COX2	2	1.7072584642212991	0.013609180255633615	0.0096231436451486	17.482953145685435	1.4945682987717295	0.0680566652925578
5	sod2∆ 8E	COX3	2	1.5193724708913976	0.021656842518542756	0.01531370020395073	17.482953145685435	1.4945682987717295	0.0680566652925578
5	sod2∆ 8E	OLI1	2	-1.5937753268572994	0.02940042017913496	0.020789236478400138	17.482953145685435	1.4945682987717295	0.0680566652925578
5	sod2∆ 8E	RNL	2	1.629253002694199	0.035690702972259195	0.025237138096999342	17.482953145685435	1.4945682987717295	0.0680566652925578
5	sod2∆ 8E	RNS	2	-1.5621657264545998	0.004540594465607702	0.003210685137249314	17.482953145685435	1.4945682987717295	0.0680566652925578
5	sod2∆ 8E	VAR1	2	-1.7457977936339457	0.01244734037400969	0.008801598786199348	17.482953145685435	1.4945682987717295	0.0680566652925578
7	sod2∆ 8E	ATP6	2	-6.431554417501301	0.14773193320068115	0.10446225176399969	25.31276105016222	1.2565316489124998	0.0678778792276654
7	sod2∆ 8E	ATP8	2	-6.51714966794785	0.1677324469200059	0.11860475064214882	25.31276105016222	1.2565316489124998	0.0678778792276654
7	sod2∆ 8E	COB	2	-5.89205248192245	0.027415122519644376	0.019385419040700565	25.31276105016222	1.2565316489124998	0.0678778792276654
7	sod2∆ 8E	COX1	2	-6.667830862714499	0.1996270972045864	0.14115767414194913	25.31276105016222	1.2565316489124998	0.0678778792276654
7	sod2∆ 8E	COX2	2	0.24950477047024763	0.024607844529932966	0.017400373737499888	25.31276105016222	1.2565316489124998	0.0678778792276654
7	sod2∆ 8E	COX3	2	1.7701819540971488	0.11360574601455568	0.08033139338864892	25.31276105016222	1.2565316489124998	0.0678778792276654
7	sod2∆ 8E	OLI1	2	-5.931698875200901	0.02464086529825543	0.017423722946700693	25.31276105016222	1.2565316489124998	0.0678778792276654
7	sod2∆ 8E	RNL	2	0.3155273531467966	0.057292200929709276	0.040511703786499646	25.31276105016222	1.2565316489124998	0.0678778792276654
7	sod2∆ 8E	RNS	2	-5.6020939912577	0.05051525474690237	0.0357196791849006	25.31276105016222	1.2565316489124998	0.0678778792276654
7	sod2∆ 8E	VAR1	2	-6.572224259722498	0.03900528316468463	0.027580900227849977	25.31276105016222	1.2565316489124998	0.0678778792276654
9	sod2∆ 8E	ATP6	2	-11.0743009615488	0	0	37.342512054570086	0.24294868493688213	0.12351233059185977
9	sod2∆ 8E	ATP8	2	-10.093933679741754	0	0	37.342512054570086	0.24294868493688213	0.12351233059185977
9	sod2∆ 8E	COB	2	-9.979260660641248	0	0	37.342512054570086	0.24294868493688213	0.12351233059185977
9	sod2∆ 8E	COX1	2	-10.114722070654404	0	0	37.342512054570086	0.24294868493688213	0.12351233059185977
9	sod2∆ 8E	COX2	2	-1.7904410358521528	0.005783988047800366	0.00408989717090158	37.342512054570086	0.24294868493688213	0.12351233059185977
9	sod2∆ 8E	COX3	2	1.9387968160302957	0.29994553649125066	0.21209352283960037	37.342512054570086	0.24294868493688213	0.12351233059185977
9	sod2∆ 8E	OLI1	2	-10.219093979164999	0.12987765381049493	0.09183736973399981	37.342512054570086	0.24294868493688213	0.12351233059185977
9	sod2∆ 8E	RNL	2	-1.6517810915115483	0.00883332933389517	0.006246107072451323	37.342512054570086	0.24294868493688213	0.12351233059185977
9	sod2∆ 8E	RNS	2	-7.513421906761549	0.0712684452251825	0.05039440090334856	37.342512054570086	0.24294868493688213	0.12351233059185977
9	sod2∆ 8E	VAR1	2	-9.707433851615948	0	0	37.342512054570086	0.24294868493688213	0.12351233059185977
0	sod2∆ 9C	ATP6	2	1.7705421587502022	0.1056251616693885	0.07468826808034999	0	1.73943235715921	0.04288764915201244
0	sod2∆ 9C	ATP8	2	1.9494189832104016	0.04823361008272129	0.034106312770600056	0	1.73943235715921	0.04288764915201244
0	sod2∆ 9C	COB	2	1.6845576604214987	0.2567993929996613	0.18158459219464973	0	1.73943235715921	0.04288764915201244
0	sod2∆ 9C	COX1	2	1.6417587983930488	0.48458899035179825	0.342656161166099	0	1.73943235715921	0.04288764915201244
0	sod2∆ 9C	COX2	2	1.767229331377946	0.0069074353903857385	0.004884294405149703	0	1.73943235715921	0.04288764915201244
0	sod2∆ 9C	COX3	2	1.6919057895142	0.11379746823099858	0.0804669614679998	0	1.73943235715921	0.04288764915201244
0	sod2∆ 9C	OLI1	2	1.6766140544161479	0.04023296794985064	0.028449004464600414	0	1.73943235715921	0.04288764915201244
0	sod2∆ 9C	RNL	2	1.4958236821312054	0.07996642635312504	0.05654480234154935	0	1.73943235715921	0.04288764915201244
0	sod2∆ 9C	RNS	2	1.6504136051613525	0.05736924401039854	0.040566181471298535	0	1.73943235715921	0.04288764915201244
0	sod2∆ 9C	VAR1	2	1.0626395599326486	0.14134138327770165	0.09994345057794972	0	1.73943235715921	0.04288764915201244
11	sod2∆ 9C	ATP6	2	0.23154064271389885	0.15211099413834497	0.10755871544825091	38.5565489142201	1.3045179798854296	0.13731001350493613
11	sod2∆ 9C	ATP8	2	0.6424237302835022	0.0785893842510587	0.055571086533198866	38.5565489142201	1.3045179798854296	0.13731001350493613
11	sod2∆ 9C	COB	2	0.16050704667484805	0.0031616956156862836	0.0022356564098995474	38.5565489142201	1.3045179798854296	0.13731001350493613
11	sod2∆ 9C	COX1	2	1.055313982175097	0.06901500250197025	0.0488009762727497	38.5565489142201	1.3045179798854296	0.13731001350493613
11	sod2∆ 9C	COX2	2	0.5787765972298438	0.10125084602315856	0.0715951598238504	38.5565489142201	1.3045179798854296	0.13731001350493613
11	sod2∆ 9C	COX3	2	0.3704422250441013	0.22260643858232693	0.15740652225735008	38.5565489142201	1.3045179798854296	0.13731001350493613
11	sod2∆ 9C	OLI1	2	0.7033751471111476	0.2378883119405731	0.16821243853819998	38.5565489142201	1.3045179798854296	0.13731001350493613
11	sod2∆ 9C	RNL	2	0.3014142606269026	0.051299356230160714	0.036274122660851005	38.5565489142201	1.3045179798854296	0.13731001350493613
11	sod2∆ 9C	RNS	2	1.4492016209288998	0.008646718151733939	0.006114153040099879	38.5565489142201	1.3045179798854296	0.13731001350493613
11	sod2∆ 9C	VAR1	2	0.30490928775865456	0.9377318085403415	0.6630765207532007	38.5565489142201	1.3045179798854296	0.13731001350493613
5	sod2∆ 9C	ATP6	2	1.484356327731751	0.009164933923169674	0.006480586926199905	16.867392516124696	1.5310212011307054	0.06973798316589426
5	sod2∆ 9C	ATP8	2	1.57271570684245	0.07720912298279334	0.05459509443059928	16.867392516124696	1.5310212011307054	0.06973798316589426
5	sod2∆ 9C	COB	2	1.4476963300699488	0.006033468042324397	0.004266306166799904	16.867392516124696	1.5310212011307054	0.06973798316589426
5	sod2∆ 9C	COX1	2	1.511524096628552	0.5769578910336759	0.40797083720900135	16.867392516124696	1.5310212011307054	0.06973798316589426
5	sod2∆ 9C	COX2	2	1.6813145014746445	0.025826552150802068	0.018262130160500156	16.867392516124696	1.5310212011307054	0.06973798316589426
5	sod2∆ 9C	COX3	2	1.4246708698375006	0.006945260114758945	0.0049110405242505095	16.867392516124696	1.5310212011307054	0.06973798316589426
5	sod2∆ 9C	OLI1	2	1.5616401012394494	0.05856132909355521	0.04140911291734994	16.867392516124696	1.5310212011307054	0.06973798316589426
5	sod2∆ 9C	RNL	2	1.2627496206458524	0.025502559136882357	0.01803303250330046	16.867392516124696	1.5310212011307054	0.06973798316589426
5	sod2∆ 9C	RNS	2	2.0715556388525016	0.021819333798158577	0.015428598889650758	16.867392516124696	1.5310212011307054	0.06973798316589426
5	sod2∆ 9C	VAR1	2	1.0743734648109022	0.19315455992447547	0.13658089913969995	16.867392516124696	1.5310212011307054	0.06973798316589426
7	sod2∆ 9C	ATP6	2	0.666107787508949	0.051707743347611745	0.03656289596094985	24.013706878823488	1.454194896738781	0.1358314440439224
7	sod2∆ 9C	ATP8	2	0.7579050854705045	0.09443442948948914	0.06677522546950064	24.013706878823488	1.454194896738781	0.1358314440439224
7	sod2∆ 9C	COB	2	0.6451515298681992	0.030484712725254205	0.021555947090551083	24.013706878823488	1.454194896738781	0.1358314440439224
7	sod2∆ 9C	COX1	2	0.31067241664445067	0.624590373263701	0.4416520883985999	24.013706878823488	1.454194896738781	0.1358314440439224
7	sod2∆ 9C	COX2	2	0.9026584794075987	0.036641586987927154	0.02590951463260005	24.013706878823488	1.454194896738781	0.1358314440439224
7	sod2∆ 9C	COX3	2	0.7916506767129015	0.06219623655093922	0.043979380629451725	24.013706878823488	1.454194896738781	0.1358314440439224
7	sod2∆ 9C	OLI1	2	0.7110934374557943	0.043045616403613284	0.030437847259349837	24.013706878823488	1.454194896738781	0.1358314440439224
7	sod2∆ 9C	RNL	2	0.6278534449767524	0.05468089982812535	0.03866523506984976	24.013706878823488	1.454194896738781	0.1358314440439224
7	sod2∆ 9C	RNS	2	2.0795193451402483	0.015283881379365916	0.010807336166200443	24.013706878823488	1.454194896738781	0.1358314440439224
7	sod2∆ 9C	VAR1	2	0.22291212440080344	0.03865028024429288	0.027329875255499944	24.013706878823488	1.454194896738781	0.1358314440439224
9	sod2∆ 9C	ATP6	2	0.4532158092685501	0.10857256399899581	0.07677239625450036	31.082531177181636	1.5174949334808943	0.07530675205851174
9	sod2∆ 9C	ATP8	2	0.6433309748131499	0.025383576108239023	0.017948898796900644	31.082531177181636	1.5174949334808943	0.07530675205851174
9	sod2∆ 9C	COB	2	0.43137626677919805	0.005695055806412635	0.0040270125799501955	31.082531177181636	1.5174949334808943	0.07530675205851174
9	sod2∆ 9C	COX1	2	-0.016305761176800687	0.002424959353624336	0.0017147052030495149	31.082531177181636	1.5174949334808943	0.07530675205851174
9	sod2∆ 9C	COX2	2	0.737925589975248	0.03483815983664123	0.024634299064549836	31.082531177181636	1.5174949334808943	0.07530675205851174
9	sod2∆ 9C	COX3	2	0.597598548074952	0.03184221085373701	0.02251584322264932	31.082531177181636	1.5174949334808943	0.07530675205851174
9	sod2∆ 9C	OLI1	2	0.5582856766923454	0.014632955277117415	0.0103470619052492	31.082531177181636	1.5174949334808943	0.07530675205851174
9	sod2∆ 9C	RNL	2	0.4359796963853997	0.05298012587142216	0.037462606271799453	31.082531177181636	1.5174949334808943	0.07530675205851174
9	sod2∆ 9C	RNS	2	2.3261534707271023	0.047161532655776474	0.03334823955205035	31.082531177181636	1.5174949334808943	0.07530675205851174
9	sod2∆ 9C	VAR1	2	-0.46489007936119553	0.015505090328087402	0.010963754513900551	31.082531177181636	1.5174949334808943	0.07530675205851174
