# Supplementary material for: Genetically controlled mtDNA deletions prevent ROS damage by arresting oxidative phosphorylation
Source: eLife. 2022 Jul 8;11:e76095. doi: 10.7554/eLife.76095 (PMC9427111; doi:10.7554/eLife.76095)
Supplement: Figure 5—source data 1. — Data are shown in Figure 5A. [file elife-76095-fig5-data1.xlsx]

## Sheet: Data S25 - RTG del. adapt.
README: Founder: WT, geneX∆::KanMX.
Strain	Environment	Batch Cycle	N	Relative doubling time	Relative Doubling time S.D	Generations
rtg2∆	Paraquat	0	128	0.12633630064116125	0.21589693773082475	7.07834302805296
rtg2∆	Paraquat	1	128	0.12633630064116125	0.21589693773082475	14.15668605610592
rtg2∆	Paraquat	3	67	0.09247183221363825	0.18640676446764978	21.173633354224485
rtg2∆	Paraquat	4	71	0.13943264321363819	0.18509482822302767	28.303027857942862
rtg2∆	Paraquat	5	71	0.12655980962155394	0.1885161759541667	35.29478356476756
rtg2∆	Paraquat	6	69	0.09586214512180341	0.16044274461457753	42.40285546330265
rtg2∆	Paraquat	7	135	0.09872792835431642	0.21543431501507074	49.46852609513989
rtg2∆	Paraquat	8	70	0.10243734951173891	0.17811460152730582	56.514451662816704
rtg2∆	Paraquat	9	70	0.1279496089377185	0.19523182489670307	63.473948394497526
rtg2∆	Paraquat	10	70	0.163318738158801	0.22511856583414583	70.40846588130661
rtg2∆	Paraquat	11	72	0.13783650081376217	0.2024311942895419	77.43817658324453
rtg3∆	Paraquat	0	120	0.07993726843046918	0.2001046747829649	7.064887067547155
rtg3∆	Paraquat	1	120	0.07993726843046918	0.2001046747829649	14.12977413509431
rtg3∆	Paraquat	3	68	0.06636452241986907	0.2289289368058135	21.16440690713056
rtg3∆	Paraquat	4	65	-0.0034988427526335855	0.2593289377089021	28.356920456633556
rtg3∆	Paraquat	5	63	0.04815744110847868	0.19566102236040053	35.577676466559836
rtg3∆	Paraquat	6	66	0.022776298722732038	0.2339789997133066	42.69052833923631
rtg3∆	Paraquat	7	131	-0.0022413979977664233	0.24795086055355534	49.878238200169356
rtg3∆	Paraquat	8	64	-0.026973623993950327	0.25981895564227264	57.229770789457866
rtg3∆	Paraquat	9	68	0.01617552843969377	0.2038016867420234	64.54370488289544
rtg3∆	Paraquat	10	69	0.027189708932279563	0.29173129459625863	71.87366267685434
rtg3∆	Paraquat	11	64	-0.03672893293983756	0.2365173542739627	79.32890453065977
Founder	Paraquat	0	47	0.04021182934674788	0.19393157411526374	6.65841581182438
Founder	Paraquat	1	47	0.04021182934674788	0.19393157411526374	13.31683162364876
Founder	Paraquat	3	24	0.008748879651768404	0.1479113064543127	20.450698511117185
Founder	Paraquat	4	23	0.10095117106559294	0.19899557493730533	27.752290363996035
Founder	Paraquat	5	23	0.12112982003061927	0.20663388695424303	35.118152041249246
Founder	Paraquat	6	23	-0.14890127845018358	0.29896614396576	42.82138203204156
Founder	Paraquat	7	48	-0.20955276161118408	0.2590874670305394	50.13476130826079
Founder	Paraquat	8	24	-0.3830822119356511	0.26636734739357903	57.64347648941928
Founder	Paraquat	9	24	-0.3696495933906721	0.16111769859211605	65.13947796203044
Founder	Paraquat	10	20	-0.3241646686833883	0.18437954386822675	72.57097004899249
Founder	Paraquat	11	24	-0.36711992233496205	0.2203210408262329	80.06528310025502
mip1∆	Paraquat	0	275	-0.20189180437788898	0.23290113538433915	7.3367655619990915
mip1∆	Paraquat	1	275	-0.20189180437788898	0.23290113538433915	14.673531123998183
mip1∆	Paraquat	2	266	-0.30461978218496477	0.24404269219172886	22.458369084215988
mip1∆	Paraquat	3	135	-0.30438941999720465	0.19879704393467787	30.20162346398947
mip1∆	Paraquat	4	128	-0.3057437418126176	0.2516123117394564	38.002094892243576
mip1∆	Paraquat	5	135	-0.3046453486160638	0.22869263641526094	46.026671785925856
mip1∆	Paraquat	6	132	-0.33901529149222964	0.2557990080647329	54.125410274279815
mip1∆	Paraquat	7	134	-0.2977041341554767	0.24282127645598015	61.97938571052062
mip1∆	Paraquat	8	132	-0.3495834207855447	0.22502482095261384	70.14116634692881
mip1∆	Paraquat	9	272	-0.30313875912657606	0.26576243052150356	78.0176293539182
