# Supplementary material for: Genetically controlled mtDNA deletions prevent ROS damage by arresting oxidative phosphorylation
Source: eLife. 2022 Jul 8;11:e76095. doi: 10.7554/eLife.76095 (PMC9427111; doi:10.7554/eLife.76095)
Supplement: Figure 5—source data 2. — Data are shown in Figure 5B. [file elife-76095-fig5-data2.xlsx]

## Sheet: Data S26 - RTG del. SCG curves
README:Log corrected cells : adjusted in y-axis to match initial value for curve comparison and retain shape in log2 scale.
Log corrected cells = 2^ (log2(Cellsk;t=n) / log2(Cellsk;t=0) /log2(median(Cellst=0))
Time (h)	Cycle	Gene	N	Environment	#cells	Log corrected cells	#cells S.D
0	0	Founder	48	Glycerol	14578.726119769177	10034.456716692752	5663.057042040112
0	10	Founder	23	Glycerol	12692.574730191287	10034.456716692752	4365.462816227122
0.3333333333333333	0	Founder	48	Glycerol	14605.12719204701	10051.919811976946	5655.156592266022
0.3333333333333333	10	Founder	23	Glycerol	12737.812352176172	10069.329541794255	4332.187269089124
0.6666666666666666	0	Founder	48	Glycerol	14681.013393787302	10102.108204760883	5651.021839933919
0.6666666666666666	10	Founder	23	Glycerol	12830.00879535233	10140.392508569035	4283.990458898807
1.3333333333333333	0	Founder	48	Glycerol	14877.805345502273	10232.21233897408	5700.085336893322
1.3333333333333333	10	Founder	23	Glycerol	12980.847821979287	10256.628532091894	4232.798807347191
1.6666666666666667	0	Founder	48	Glycerol	14997.447727928464	10311.278118020955	5741.541089452213
1.6666666666666667	10	Founder	23	Glycerol	13101.846325655282	10349.845256810184	4208.364847419568
2	0	Founder	48	Glycerol	15114.549768740788	10388.641314116432	5803.320640068237
2	10	Founder	23	Glycerol	13210.994966646558	10433.914527034578	4199.583668160606
2.3333333333333335	0	Founder	48	Glycerol	15213.691287750156	10454.120672547673	5883.204372749444
2.3333333333333335	10	Founder	23	Glycerol	13279.195225644798	10486.435455482726	4204.111078188479
2.6666666666666665	0	Founder	48	Glycerol	15301.227794239505	10511.921521464086	5963.0181884104095
2.6666666666666665	10	Founder	23	Glycerol	13339.072783585518	10532.541551644228	4223.83573702647
3	0	Founder	48	Glycerol	15373.93601408148	10559.921372068686	6033.085282061375
3	10	Founder	23	Glycerol	13395.822956465325	10576.234790501556	4250.254053903691
3.3333333333333335	0	Founder	48	Glycerol	15451.150152373351	10610.886216995103	6113.169002404994
3.3333333333333335	10	Founder	23	Glycerol	13449.838963262811	10617.818656925236	4277.219639319367
3.6666666666666665	0	Founder	48	Glycerol	15539.684067083665	10669.310421901908	6207.721052249238
3.6666666666666665	10	Founder	23	Glycerol	13503.79890382703	10659.355214337897	4301.055916886812
4	0	Founder	48	Glycerol	15645.847414703527	10739.351332903305	6299.111042471439
4	10	Founder	23	Glycerol	13550.363379248141	10695.195671571204	4319.677561237588
4.333333333333333	0	Founder	48	Glycerol	15797.097817760647	10839.10632993683	6434.092614562399
4.333333333333333	10	Founder	23	Glycerol	13593.604815125038	10728.475657843164	4327.886045044548
4.666666666666667	0	Founder	48	Glycerol	15988.436542170564	10965.247735703051	6588.473903481347
4.666666666666667	10	Founder	23	Glycerol	13640.534993686422	10764.591639027705	4328.998130600939
5	0	Founder	48	Glycerol	16228.123501211712	11123.180174310224	6764.3399407738825
5	10	Founder	23	Glycerol	13681.045955144129	10795.765108299865	4331.127172215936
5.333333333333333	0	Founder	48	Glycerol	16552.475224561	11336.754767533244	7014.273364014854
5.333333333333333	10	Founder	23	Glycerol	13724.633911718192	10829.30378332055	4338.811058754637
5.666666666666667	0	Founder	48	Glycerol	16930.88073451888	11585.71615619078	7324.073129995832
5.666666666666667	10	Founder	23	Glycerol	13778.014735981136	10870.373955192847	4353.024792520525
6	0	Founder	48	Glycerol	17355.77119617386	11865.00298182005	7666.7579710008595
6	10	Founder	23	Glycerol	13831.984091790535	10911.89290904929	4374.522812271339
6.333333333333333	0	Founder	48	Glycerol	17887.260881635848	12213.98496251327	8106.563970037145
6.333333333333333	10	Founder	23	Glycerol	13875.5976637283	10945.442151274283	4395.752003627153
6.666666666666667	0	Founder	48	Glycerol	18494.24979378573	12612.047316627333	8609.51695454652
6.666666666666667	10	Founder	23	Glycerol	13913.903006040522	10974.905935046481	4419.910642684488
7	0	Founder	48	Glycerol	19180.507674645476	13061.482235004545	9158.508972053856
7	10	Founder	23	Glycerol	13940.39148321228	10995.279217501979	4438.842675942389
7.333333333333333	0	Founder	48	Glycerol	19971.55167143943	13578.76678491741	9776.290814631837
7.333333333333333	10	Founder	23	Glycerol	13966.333107034407	11015.230961362551	4450.641173975179
7.666666666666667	0	Founder	48	Glycerol	20882.216451901735	14173.288542616017	10484.559040604054
7.666666666666667	10	Founder	23	Glycerol	13999.74709059987	11040.928351059507	4453.712027962208
8	0	Founder	48	Glycerol	21908.109063744567	14841.828989442307	11292.100294421494
8	10	Founder	23	Glycerol	14042.87453046405	11074.093726250792	4455.56558751828
8.333333333333334	0	Founder	48	Glycerol	23062.929997341784	15592.932170324611	12206.411652721456
8.333333333333334	10	Founder	23	Glycerol	14083.089222426383	11105.016890672074	4453.271829370615
8.666666666666666	0	Founder	48	Glycerol	24361.18373716813	16435.57998055632	13211.082308184017
8.666666666666666	10	Founder	23	Glycerol	14128.137070004519	11139.653911911631	4453.917467848517
9	0	Founder	48	Glycerol	25826.318955217597	17384.448867784056	14333.907372889038
9	10	Founder	23	Glycerol	14165.29843943435	11168.224999356084	4461.004035128155
9.333333333333334	0	Founder	48	Glycerol	27432.604332942017	18422.326817438032	15520.704380471234
9.333333333333334	10	Founder	23	Glycerol	14192.583575590077	11189.201672450054	4479.209032578696
9.666666666666666	0	Founder	48	Glycerol	29215.146295066308	19571.326164102033	16813.67387768385
9.666666666666666	10	Founder	23	Glycerol	14218.51117674991	11209.133750233941	4499.578191692401
10	0	Founder	48	Glycerol	31221.905092159323	20861.594077361922	18206.769461611075
10	10	Founder	23	Glycerol	14249.318037502926	11232.815627992768	4517.418512394952
10.333333333333334	0	Founder	48	Glycerol	33438.21033970661	22282.847868437497	19730.846768826796
10.333333333333334	10	Founder	23	Glycerol	14273.565047733855	11251.45391592279	4532.692524312594
10.666666666666666	0	Founder	48	Glycerol	35843.32698819554	23821.038569610315	21314.68254189291
10.666666666666666	10	Founder	23	Glycerol	14292.900821685043	11266.316450889299	4536.95116413331
11	0	Founder	48	Glycerol	38451.622511081594	25484.637931782436	22994.481141730717
11	10	Founder	23	Glycerol	14311.630140323141	11280.712354315741	4531.812436524504
11.333333333333334	0	Founder	48	Glycerol	41222.11066419927	27246.879579187	24692.58523729812
11.333333333333334	10	Founder	23	Glycerol	14328.785876551552	11293.898345008824	4523.830571772218
11.666666666666666	0	Founder	48	Glycerol	44179.670005380605	29123.03078593982	26480.98144963248
11.666666666666666	10	Founder	23	Glycerol	14338.528760317919	11301.386602785771	4519.059093151492
12	0	Founder	48	Glycerol	47283.93492294361	31086.990944385827	28261.75744481135
12	10	Founder	23	Glycerol	14352.598287524683	11312.200040937256	4513.489900867961
12.333333333333334	0	Founder	48	Glycerol	50589.221852862516	33172.61947438191	30143.95829034118
12.333333333333334	10	Founder	23	Glycerol	14370.776812324657	11326.171147368754	4510.61265950769
12.666666666666666	0	Founder	48	Glycerol	54074.99439700972	35366.39208638521	31989.492315907522
12.666666666666666	10	Founder	23	Glycerol	14399.814385627022	11348.48706470955	4512.988773534281
13	0	Founder	48	Glycerol	57771.85004529923	37687.00079512034	33892.96979373957
13	10	Founder	23	Glycerol	14427.566510016388	11369.814044597804	4522.165829879796
13.333333333333334	0	Founder	48	Glycerol	61627.190304917094	40100.9402387471	35760.3502832048
13.333333333333334	10	Founder	23	Glycerol	14470.042547407817	11402.454096584834	4527.562375636612
13.666666666666666	0	Founder	48	Glycerol	65651.65872518971	42614.50834683498	37633.073111597936
13.666666666666666	10	Founder	23	Glycerol	14518.763061912305	11439.88968656653	4542.462798795099
14	0	Founder	48	Glycerol	69816.13830593863	45209.2112223896	39450.35478365077
14	10	Founder	23	Glycerol	14564.185257908306	11474.788119207631	4564.726077890394
14.333333333333334	0	Founder	48	Glycerol	74156.32416086728	47906.98070667016	41347.15680739864
14.333333333333334	10	Founder	23	Glycerol	14599.814360356997	11502.160502722563	4579.58402670132
14.666666666666666	0	Founder	48	Glycerol	78595.82801674884	50660.12602893809	43179.73581212433
14.666666666666666	10	Founder	23	Glycerol	14636.029450142461	11529.981373925764	4591.248156545852
15	0	Founder	48	Glycerol	83085.05355847714	53437.94966965351	44945.808850382906
15	10	Founder	23	Glycerol	14660.904910630019	11549.090012276125	4603.4617329144685
15.333333333333334	0	Founder	48	Glycerol	87718.83091672577	56299.092203182496	46694.19531667767
15.333333333333334	10	Founder	23	Glycerol	14676.76529345973	11561.273097139658	4608.286344478486
15.666666666666666	0	Founder	48	Glycerol	92482.5674441578	59234.34620708701	48475.729589513234
15.666666666666666	10	Founder	23	Glycerol	14696.1700231114	11576.178311451476	4608.636376148559
16	0	Founder	48	Glycerol	97296.06450746387	62194.28198137741	50203.170897103155
16	10	Founder	23	Glycerol	14722.443888210368	11596.35908508309	4617.9546343491265
16.333333333333332	0	Founder	48	Glycerol	102123.26155373047	65156.91583826226	51855.775522886746
16.333333333333332	10	Founder	23	Glycerol	14754.027914902414	11620.617371662402	4629.760660049605
16.666666666666668	0	Founder	48	Glycerol	107051.65000719373	68176.03071260004	53490.03303771923
16.666666666666668	10	Founder	23	Glycerol	14789.059574924184	11647.522121606631	4643.783222929869
17	0	Founder	48	Glycerol	111905.83186260538	71144.39477157111	55025.21587490029
17	10	Founder	23	Glycerol	14824.145154679074	11674.466693968407	4652.41920414684
17.333333333333332	0	Founder	48	Glycerol	116789.17773700297	74125.53391674122	56581.37113311357
17.333333333333332	10	Founder	23	Glycerol	14852.64248410379	11696.35053916337	4659.496442672652
17.666666666666668	0	Founder	48	Glycerol	121688.09050026041	77111.29905403961	58085.52038586412
17.666666666666668	10	Founder	23	Glycerol	14863.285653562127	11704.523439644883	4648.0274149274865
18	0	Founder	48	Glycerol	126710.59749130232	80167.53398868085	59673.617070252876
18	10	Founder	23	Glycerol	14863.66642887453	11704.815834691073	4625.0498034700295
18.333333333333332	0	Founder	48	Glycerol	131695.74897848477	83196.3723253772	61199.960584454544
18.333333333333332	10	Founder	23	Glycerol	14856.157960424009	11699.050093053302	4601.25973940221
18.666666666666668	0	Founder	48	Glycerol	136872.60059481944	86336.958939748	63007.54297570119
18.666666666666668	10	Founder	23	Glycerol	14851.641078471841	11695.581551280799	4589.535659198209
19	0	Founder	48	Glycerol	142113.2800410515	89511.55639632698	64753.930099759054
19	10	Founder	23	Glycerol	14853.608194475377	11697.092115131283	4580.736131007809
19.333333333333332	0	Founder	48	Glycerol	147399.94668948505	92709.39243047449	66507.88390177657
19.333333333333332	10	Founder	23	Glycerol	14867.14482216996	11707.486863120883	4586.914763438798
19.666666666666668	0	Founder	48	Glycerol	152651.3518621208	95881.47695072726	68203.71325233523
19.666666666666668	10	Founder	23	Glycerol	14887.089295490436	11722.801753492151	4606.981728364726
20	0	Founder	48	Glycerol	158008.5665474929	99113.09724019961	69993.45787303247
20	10	Founder	23	Glycerol	14910.03350433773	11740.419438865245	4623.94510511702
20.333333333333332	0	Founder	48	Glycerol	163297.49736231405	102299.34050075538	71636.32354157319
20.333333333333332	10	Founder	23	Glycerol	14928.046208602433	11754.250001412032	4632.846350933088
20.666666666666668	0	Founder	48	Glycerol	168570.69676884013	105472.10545776872	73337.80559295425
20.666666666666668	10	Founder	23	Glycerol	14939.501427499827	11763.045362152556	4638.533097526169
21	0	Founder	48	Glycerol	173955.07403666616	108707.77618640446	75208.4278232887
21	10	Founder	23	Glycerol	14950.778159300555	11771.703515994845	4643.459188567503
21.333333333333332	0	Founder	48	Glycerol	179377.55401920495	111962.40262979589	77150.97859880801
21.333333333333332	10	Founder	23	Glycerol	14962.252447158575	11780.513184556621	4638.192281278949
21.666666666666668	0	Founder	48	Glycerol	184831.36862658506	115231.97177425143	79101.866904794515
21.666666666666668	10	Founder	23	Glycerol	14974.55675172902	11789.959932309517	4634.475875995079
22	0	Founder	48	Glycerol	190312.82446406572	118514.3262218793	81071.20183529078
22	10	Founder	23	Glycerol	14992.814811081951	11803.977376643381	4632.515760267749
22.333333333333332	0	Founder	48	Glycerol	195836.37014713523	121818.1604093803	83116.13967325006
22.333333333333332	10	Founder	23	Glycerol	15016.387874857246	11822.074735188937	4631.653285933137
22.666666666666668	0	Founder	48	Glycerol	201335.4969720936	125103.78354532411	85159.16084447697
22.666666666666668	10	Founder	23	Glycerol	15040.420748286464	11840.524368461149	4628.672425739737
23	0	Founder	48	Glycerol	206979.7740792026	128472.49744893565	87317.90032743246
23	10	Founder	23	Glycerol	15066.144274514794	11860.271075175435	4633.542165169736
23.333333333333332	0	Founder	48	Glycerol	212727.3178452481	131899.1688411527	89551.42829334998
23.333333333333332	10	Founder	23	Glycerol	15096.236758029412	11883.370554968698	4641.34011545189
23.666666666666668	0	Founder	48	Glycerol	218399.72274853793	135277.50685739782	91628.8869927519
23.666666666666668	10	Founder	23	Glycerol	15122.26041496535	11903.345813860245	4644.337075037193
24	0	Founder	48	Glycerol	224145.85431015844	138696.27073118705	93628.65105997605
24	10	Founder	23	Glycerol	15144.592512917123	11920.48682137854	4649.007172876016
24.333333333333332	0	Founder	48	Glycerol	230006.5276069216	142179.66776236144	95714.42543595615
24.333333333333332	10	Founder	23	Glycerol	15162.36717549627	11934.129318888683	4653.102890655113
24.666666666666668	0	Founder	48	Glycerol	235951.5135410562	145709.6461682023	97995.48516167636
24.666666666666668	10	Founder	23	Glycerol	15171.90645594991	11941.450790872359	4648.608860220989
25	0	Founder	48	Glycerol	241960.5376104618	149274.12896035472	100352.17811022911
25	10	Founder	23	Glycerol	15171.680834623665	11941.277626070834	4646.29046747122
25.333333333333332	0	Founder	48	Glycerol	248121.78505691933	152925.3298343105	102961.06100602682
25.333333333333332	10	Founder	23	Glycerol	15172.60552339646	11941.987326074584	4650.62968991115
25.666666666666668	0	Founder	48	Glycerol	254338.36356279306	156605.7417423503	105719.89721992124
25.666666666666668	10	Founder	23	Glycerol	15177.896000901748	11946.047754720757	4649.883279189707
26	0	Founder	48	Glycerol	260543.89490215303	160276.1190829409	108419.8346676714
26	10	Founder	23	Glycerol	15183.1699462362	11950.095459931646	4649.797449834608
26.333333333333332	0	Founder	48	Glycerol	266692.19790510414	163909.28959071747	111011.29428817578
26.333333333333332	10	Founder	23	Glycerol	15191.475468288427	11956.469801889061	4652.4038811379105
26.666666666666668	0	Founder	48	Glycerol	272827.5710397444	167531.5675588936	113682.24517314875
26.666666666666668	10	Founder	23	Glycerol	15205.233964427556	11967.029014774447	4653.530985535147
27	0	Founder	48	Glycerol	279091.93991023244	171226.73077492893	116495.94534547582
27	10	Founder	23	Glycerol	15211.734480684378	11972.017873797407	4657.612470108596
27.333333333333332	0	Founder	48	Glycerol	285359.49835484807	174920.54262326297	119348.92888087108
27.333333333333332	10	Founder	23	Glycerol	15206.693210501438	11968.14892628049	4670.891258898777
27.666666666666668	0	Founder	48	Glycerol	291554.8276430288	178568.6801919643	122237.56214164557
27.666666666666668	10	Founder	23	Glycerol	15201.764834879099	11964.366589412113	4683.676191822498
28	0	Founder	48	Glycerol	297799.764666606	182242.97392982102	125203.52520553209
28	10	Founder	23	Glycerol	15193.022017318963	11957.6567414697	4696.28172325081
28.333333333333332	0	Founder	48	Glycerol	304011.06060592603	185894.49753494182	128053.36747139113
28.333333333333332	10	Founder	23	Glycerol	15176.882053753761	11945.269555472327	4699.483611074127
28.666666666666668	0	Founder	48	Glycerol	310310.2925010587	189594.74982408187	131090.74880964644
28.666666666666668	10	Founder	23	Glycerol	15153.176546870505	11927.075331542119	4689.157446369469
29	0	Founder	48	Glycerol	316613.21114162356	193294.23956774423	134219.58013196723
29	10	Founder	23	Glycerol	15135.078484257454	11913.184403148429	4671.750401393269
29.333333333333332	0	Founder	48	Glycerol	323360.42310545815	197251.32929894186	137769.7604497819
29.333333333333332	10	Founder	23	Glycerol	15115.30094381034	11898.003941366082	4654.403969961153
30	0	Founder	48	Glycerol	333804.5081432935	203370.2358326408	141544.2683535621
30	10	Founder	23	Glycerol	15095.08111913061	11882.483488912712	4636.916111012674
30.333333333333332	0	Founder	48	Glycerol	341613.5254155166	207940.44290298925	146003.33517581396
30.333333333333332	10	Founder	23	Glycerol	15089.473337217418	11878.178942995859	4629.1989876296175
30.666666666666668	0	Founder	48	Glycerol	349198.9243857787	212375.88124435593	149845.25103714
30.666666666666668	10	Founder	23	Glycerol	15088.867245174908	11877.713703008694	4633.40718640599
31	0	Founder	48	Glycerol	356913.30281349283	216882.8898608517	153902.85940481638
31	10	Founder	23	Glycerol	15096.422941484361	11883.513468850117	4643.8398574773055
31.333333333333332	0	Founder	48	Glycerol	364480.1075448367	221299.99427162332	158146.09978692076
31.333333333333332	10	Founder	23	Glycerol	15103.043675479465	11888.595496620776	4660.420575429822
31.666666666666668	0	Founder	48	Glycerol	371693.2139550035	225507.3018759932	161577.565891736
31.666666666666668	10	Founder	23	Glycerol	15117.057254929035	11899.352036645081	4679.46189943448
32	0	Founder	48	Glycerol	379414.94023290504	230007.75784708955	165355.0801863814
32	10	Founder	23	Glycerol	15127.625177326414	11907.463596005064	4699.994699873672
32.333333333333336	0	Founder	48	Glycerol	387387.23528190085	234650.51080328287	169489.31529040588
32.333333333333336	10	Founder	23	Glycerol	15146.490165609768	11921.943336199658	4717.400100303123
32.666666666666664	0	Founder	48	Glycerol	395545.910030241	239397.95170388106	173625.02063004317
32.666666666666664	10	Founder	23	Glycerol	15160.189289615379	11932.457758466315	4728.0104159019
33	0	Founder	48	Glycerol	404213.60912573116	244437.41165000026	177414.63694661116
33	10	Founder	23	Glycerol	15171.89827637433	11941.444513033504	4735.49407246919
33.333333333333336	0	Founder	48	Glycerol	413141.332253726	249623.65214936654	181641.08512805065
33.333333333333336	10	Founder	23	Glycerol	15173.619425417115	11942.76549614193	4734.175886863412
33.666666666666664	0	Founder	48	Glycerol	421527.3486655204	254491.23002065156	185417.89242300938
33.666666666666664	10	Founder	23	Glycerol	15176.809686491506	11945.214013919378	4731.443884132888
34	0	Founder	48	Glycerol	430358.41093954275	259613.0544051998	189471.98302530183
34	10	Founder	23	Glycerol	15175.533167587879	11944.23429023706	4725.2338172258205
34.333333333333336	0	Founder	48	Glycerol	439408.64577798446	264857.74762764963	193424.42443353918
34.333333333333336	10	Founder	23	Glycerol	15174.777966502556	11943.654675146488	4716.0687320634
34.666666666666664	0	Founder	48	Glycerol	448427.6827598719	270080.17570707184	197608.568598278
34.666666666666664	10	Founder	23	Glycerol	15179.54858909052	11947.316104929634	4705.580239171594
35	0	Founder	48	Glycerol	457723.2689072136	275458.45792612707	201957.87458657933
35	10	Founder	23	Glycerol	15188.0292961759	11953.824935985227	4703.175194011658
35.333333333333336	0	Founder	48	Glycerol	467280.3977337482	280983.6301664262	206376.27298882641
35.333333333333336	10	Founder	23	Glycerol	15188.514013114293	11954.196947123879	4697.453883686155
35.666666666666664	0	Founder	48	Glycerol	476824.64357168943	286496.9619316018	210850.0236115716
35.666666666666664	10	Founder	23	Glycerol	15191.705799895004	11956.646576106798	4696.0894781850475
36	0	Founder	48	Glycerol	486052.10324825	291823.21132488636	215135.62121052804
36	10	Founder	23	Glycerol	15196.423732132947	11960.267466072175	4702.541833584886
36.333333333333336	0	Founder	48	Glycerol	495912.172424709	297510.26309335633	219731.38888300557
36.333333333333336	10	Founder	23	Glycerol	15202.64582738379	11965.042719179279	4712.063145332646
36.666666666666664	0	Founder	48	Glycerol	505965.12596893776	303304.0323313808	224514.59196947972
36.666666666666664	10	Founder	23	Glycerol	15209.765549505048	11970.50681170674	4719.906307345997
37	0	Founder	48	Glycerol	516305.4775171685	309258.75938463473	229452.3202158163
37	10	Founder	23	Glycerol	15223.106515812353	11980.74528082538	4728.467102753598
37.333333333333336	0	Founder	48	Glycerol	526649.1446280121	315210.7485229914	234200.16342250563
37.333333333333336	10	Founder	23	Glycerol	15235.42099507857	11990.19577867407	4736.517178506139
37.666666666666664	0	Founder	48	Glycerol	537373.7798481819	321377.14902988565	239230.07073665678
37.666666666666664	10	Founder	23	Glycerol	15245.21513100519	11997.711954404755	4740.875064202372
38	0	Founder	48	Glycerol	547611.803832321	327259.2866764705	244144.8859271759
38	10	Founder	23	Glycerol	15249.350269534096	12000.885289441	4744.4560067656175
38.333333333333336	0	Founder	48	Glycerol	557930.8512439007	333183.6412716428	249080.6396790333
38.333333333333336	10	Founder	23	Glycerol	15254.464232990436	12004.809752165258	4752.64817639689
38.666666666666664	0	Founder	48	Glycerol	568610.7963480601	339310.70052005723	254275.39921573698
38.666666666666664	10	Founder	23	Glycerol	15256.394307767949	12006.290885749286	4759.3956501540115
39	0	Founder	48	Glycerol	579232.3698725712	345399.82624825864	259536.32532913514
39	10	Founder	23	Glycerol	15255.604554774996	12005.684832239167	4760.557993756894
39.333333333333336	0	Founder	48	Glycerol	589996.6375458008	351566.3187912421	264564.4140327127
39.333333333333336	10	Founder	23	Glycerol	15257.442445606504	12007.09522162421	4759.917697218961
39.666666666666664	0	Founder	48	Glycerol	601638.4892407071	358230.6201309609	270524.85150010925
39.666666666666664	10	Founder	23	Glycerol	15261.79994685851	12010.43913214129	4754.999309135872
40	0	Founder	48	Glycerol	613948.4207430047	365271.8980417126	277283.2823957419
40	10	Founder	23	Glycerol	15267.48675088213	12014.803102926726	4746.2439936844585
40.666666666666664	0	Founder	48	Glycerol	630876.0668213606	374945.550794853	283764.334970918
40.666666666666664	10	Founder	23	Glycerol	15278.369182994036	12023.154010534909	4738.659045883007
41	0	Founder	48	Glycerol	643401.1515488456	382096.74627600616	291125.73235547316
41	10	Founder	23	Glycerol	15276.243557671227	12021.52287018424	4744.130588180516
41.333333333333336	0	Founder	48	Glycerol	655752.9108919982	389143.67095051636	298295.5855057608
41.333333333333336	10	Founder	23	Glycerol	15274.187559256268	12019.945154038824	4752.866971470208
41.666666666666664	0	Founder	48	Glycerol	667702.0313334423	395955.9610943575	304876.02618199313
41.666666666666664	10	Founder	23	Glycerol	15270.398155507888	12017.037256890422	4764.188985608378
42	0	Founder	48	Glycerol	679054.100660665	402423.46768641454	310597.7375690555
42	10	Founder	23	Glycerol	15265.25143758895	12013.087760804869	4773.653716846396
42.333333333333336	0	Founder	48	Glycerol	690774.6343370198	409096.4781516788	316671.6221235817
42.333333333333336	10	Founder	23	Glycerol	15267.248227553744	12014.620064402316	4778.5129755788175
42.666666666666664	0	Founder	48	Glycerol	701554.4648801913	415230.01014875283	321812.7479448681
42.666666666666664	10	Founder	23	Glycerol	15274.504736030696	12020.188547040812	4774.066127632345
43	0	Founder	48	Glycerol	713541.9056648718	422046.3425345993	328252.70210501173
43	10	Founder	23	Glycerol	15274.131010570141	12019.901760071254	4772.219768824935
43.333333333333336	0	Founder	48	Glycerol	726279.5786835965	429284.38797774294	335677.70085658453
43.333333333333336	10	Founder	23	Glycerol	15284.684045278034	12027.999810881527	4779.932253267743
44	0	Founder	48	Glycerol	745440.3551275074	440163.007816133	344548.50049897295
44	10	Founder	23	Glycerol	15306.407339263147	12044.669112665846	4789.139807462894
44.333333333333336	0	Founder	48	Glycerol	759222.1905670823	447980.9585603435	353138.77398754546
44.333333333333336	10	Founder	23	Glycerol	15318.909321269333	12054.262202713977	4811.904819378306
44.666666666666664	0	Founder	48	Glycerol	772745.389674187	455646.8203615274	361263.0674130962
44.666666666666664	10	Founder	23	Glycerol	15327.94995058045	12061.199187130636	4833.927378839986
45	0	Founder	48	Glycerol	784980.8031986441	462578.17315802275	368113.9254653381
45	10	Founder	23	Glycerol	15336.3407363906	12067.637447705893	4851.075123909849
45.333333333333336	0	Founder	48	Glycerol	796997.0928852528	469381.2961879265	374512.8039993595
45.333333333333336	10	Founder	23	Glycerol	15327.578036379651	12060.913814865196	4853.338284940903
45.666666666666664	0	Founder	48	Glycerol	808832.2764747285	476077.97874938755	380721.5543459569
45.666666666666664	10	Founder	23	Glycerol	15311.96641048057	12048.934754019974	4855.601249552758
46	0	Founder	48	Glycerol	820794.8524616234	482842.8650431058	386917.1322305628
46	10	Founder	23	Glycerol	15301.910816204714	12041.218768058692	4857.082302623779
46.333333333333336	0	Founder	48	Glycerol	832995.6860759134	489738.53146910615	393374.8579430128
46.333333333333336	10	Founder	23	Glycerol	15300.75031881196	12040.328272385708	4852.524322404419
46.666666666666664	0	Founder	48	Glycerol	845430.3105598685	496762.28422413743	399882.4311698986
46.666666666666664	10	Founder	23	Glycerol	15299.336043048173	12039.243040233268	4849.497592711102
47	0	Founder	48	Glycerol	857340.7450624822	503486.17205249844	405917.2970010834
47	10	Founder	23	Glycerol	15303.811065320217	12042.67690093917	4852.884683147871
47.333333333333336	0	Founder	48	Glycerol	869257.7090000813	510210.104449294	411655.5310231172
47.333333333333336	10	Founder	23	Glycerol	15307.241665488456	12045.309318550813	4856.2720286800595
47.666666666666664	0	Founder	48	Glycerol	881611.1233828128	517176.5064622919	417827.0579362231
47.666666666666664	10	Founder	23	Glycerol	15307.312787640267	12045.363892871093	4859.608652668934
48	0	Founder	48	Glycerol	894046.9932887666	524185.56683948764	423886.2191095202
48	10	Founder	23	Glycerol	15301.605226067979	12040.984276790452	4868.049763340731
48.333333333333336	0	Founder	48	Glycerol	906704.651099726	531315.7310450348	430073.0121011225
48.333333333333336	10	Founder	23	Glycerol	15296.124155118521	12036.778416821513	4872.3521482208225
48.666666666666664	0	Founder	48	Glycerol	918922.7976142835	538194.6366349893	435839.8137774328
48.666666666666664	10	Founder	23	Glycerol	15288.404685996162	12030.854874707264	4871.51585547736
49	0	Founder	48	Glycerol	931444.9070867792	545240.9792117504	441820.6645827015
49	10	Founder	23	Glycerol	15283.179455914002	12026.845247124442	4868.304137095854
49.333333333333336	0	Founder	48	Glycerol	943797.5451038441	552188.3425315853	447703.93049717916
49.333333333333336	10	Founder	23	Glycerol	15272.665311378458	12018.777019845224	4855.61494690428
49.666666666666664	0	Founder	48	Glycerol	955715.6964412595	558887.9843244314	453328.3294502387
49.666666666666664	10	Founder	23	Glycerol	15261.482266726822	12010.195347831197	4850.147013173069
50	0	Founder	48	Glycerol	968281.1243962573	565947.9611456643	459464.9700776972
50	10	Founder	23	Glycerol	15264.235551910038	12012.308185021755	4854.339361782902
50.333333333333336	0	Founder	48	Glycerol	981488.7164077386	573364.8963574334	466095.727668914
50.333333333333336	10	Founder	23	Glycerol	15271.956726920671	12018.233269218494	4858.601032599118
50.666666666666664	0	Founder	48	Glycerol	994669.3203148866	580762.8000677734	473072.7441839012
50.666666666666664	10	Founder	23	Glycerol	15278.886844433187	12023.551247355375	4864.882104458671
51	0	Founder	48	Glycerol	1007287.4834193441	587841.4431587273	479495.2502534848
51	10	Founder	23	Glycerol	15290.995791868903	12032.843170602286	4874.529344291563
51.333333333333336	0	Founder	48	Glycerol	1020243.0212119874	595105.7560716268	486221.39550729794
51.333333333333336	10	Founder	23	Glycerol	15305.399266903332	12043.895584513855	4881.386106944935
51.666666666666664	0	Founder	48	Glycerol	1033093.5184749059	602307.621793989	492940.0259288167
51.666666666666664	10	Founder	23	Glycerol	15309.089196133431	12046.726986339321	4882.753447462562
52	0	Founder	48	Glycerol	1045629.6594216869	609329.9483971865	499783.50811278727
52	10	Founder	23	Glycerol	15303.695883207256	12042.588517483986	4885.701947681978
52.333333333333336	0	Founder	48	Glycerol	1058165.723711729	616348.952538814	506661.83998260036
52.333333333333336	10	Founder	23	Glycerol	15294.071376689588	12035.203222562257	4889.630204565819
52.666666666666664	0	Founder	48	Glycerol	1071510.8462053954	623817.3938171469	514110.68595921807
52.666666666666664	10	Founder	23	Glycerol	15280.56589469885	12024.839694487175	4894.634270753867
53	0	Founder	48	Glycerol	1084265.3939067742	630951.9398990056	520949.36298366025
53	10	Founder	23	Glycerol	15272.858332246222	12018.925139296081	4902.63107764648
53.333333333333336	0	Founder	48	Glycerol	1096313.7843824136	637688.4774836185	527125.193912704
53.333333333333336	10	Founder	23	Glycerol	15266.182949447537	12013.802588220715	4911.771332858019
53.666666666666664	0	Founder	48	Glycerol	1109157.5371869635	644866.5458005668	533614.9604679071
53.666666666666664	10	Founder	23	Glycerol	15270.212566843951	12016.894840159666	4911.582411242465
54	0	Founder	48	Glycerol	1121600.9295330658	651817.7737571807	539555.046270474
54	10	Founder	23	Glycerol	15279.480607726886	12024.006881891219	4906.232538920883
54.333333333333336	0	Founder	48	Glycerol	1134161.8910877595	658831.632464265	546148.5483474003
54.333333333333336	10	Founder	23	Glycerol	15303.574807496661	12042.495611637574	4909.578261642532
54.666666666666664	0	Founder	48	Glycerol	1147463.4555830266	666255.7350483146	553581.6485635886
54.666666666666664	10	Founder	23	Glycerol	15324.067349500827	12058.220032746312	4907.321188181178
55	0	Founder	48	Glycerol	1161004.029109825	673809.7944800955	561476.6948770476
55	10	Founder	23	Glycerol	15353.28074917727	12080.635274051141	4912.386934005431
55.333333333333336	0	Founder	48	Glycerol	1174218.4961702488	681178.615343844	569422.1577570796
55.333333333333336	10	Founder	23	Glycerol	15374.22539832129	12096.705306789216	4925.294897145724
55.666666666666664	0	Founder	48	Glycerol	1186652.870551528	688109.4802903467	576775.902814178
55.666666666666664	10	Founder	23	Glycerol	15396.88800659626	12114.092850973906	4939.533973750671
56	0	Founder	48	Glycerol	1198302.9454865004	694600.6125893183	583241.2029298608
56	10	Founder	23	Glycerol	15405.215560585226	12120.48188113468	4946.032744280948
56.333333333333336	0	Founder	48	Glycerol	1210425.7817082987	701352.5460609917	590050.1156884327
56.333333333333336	10	Founder	23	Glycerol	15407.262956683386	12122.05266240817	4953.273146363447
56.666666666666664	0	Founder	48	Glycerol	1221873.042545903	707725.792549279	596295.5809745564
56.666666666666664	10	Founder	23	Glycerol	15402.853625214168	12118.66977596436	4955.53022242988
57	0	Founder	48	Glycerol	1233681.4044221174	714297.6446131914	602431.4041407583
57	10	Founder	23	Glycerol	15407.46141612289	12122.20492205462	4959.942180568675
57.333333333333336	0	Founder	48	Glycerol	1247297.499958252	721872.5365172138	609846.6586291351
57.333333333333336	10	Founder	23	Glycerol	15397.996530372679	12114.94333277628	4956.95029463868
57.666666666666664	0	Founder	48	Glycerol	1260960.044064564	729470.0310110967	617008.4929699257
57.666666666666664	10	Founder	23	Glycerol	15399.577794667657	12116.156508005355	4956.476486463961
58	0	Founder	48	Glycerol	1274204.736064297	736832.1040585159	623440.2836081452
58	10	Founder	23	Glycerol	15407.654623995815	12122.353152610933	4950.37571670281
58.333333333333336	0	Founder	48	Glycerol	1288289.2016052147	744657.6961703033	630439.7415288365
58.333333333333336	10	Founder	23	Glycerol	15413.19205014965	12126.601488618428	4938.23762560705
58.666666666666664	0	Founder	48	Glycerol	1301579.5961169128	752039.0307662576	636620.8938419807
58.666666666666664	10	Founder	23	Glycerol	15422.743047470549	12133.928963660595	4933.100718905709
59	0	Founder	48	Glycerol	1314582.3781502238	759257.7870144253	643118.2142208439
59	10	Founder	23	Glycerol	15448.315582494935	12153.547522982093	4933.539891326887
59.333333333333336	0	Founder	48	Glycerol	1327921.930411919	766660.6178399925	649976.0446144104
59.333333333333336	10	Founder	23	Glycerol	15465.105850126425	12166.428124251426	4929.402224232655
59.666666666666664	0	Founder	48	Glycerol	1341333.1397992293	774100.294848659	657244.4025566139
59.666666666666664	10	Founder	23	Glycerol	15487.412089551215	12183.539748147288	4937.173829595125
60	0	Founder	48	Glycerol	1354090.9620701354	781174.8248941425	663527.9093969974
60	10	Founder	23	Glycerol	15509.31269138056	12200.339601896934	4951.604426382686
60.333333333333336	0	Founder	48	Glycerol	1367122.922114177	788398.6905384627	670178.4765590208
60.333333333333336	10	Founder	23	Glycerol	15524.954835627464	12212.338259588836	4954.792234786135
60.666666666666664	0	Founder	48	Glycerol	1379697.7561599943	795366.619185981	676276.7764617732
60.666666666666664	10	Founder	23	Glycerol	15534.95020794414	12220.005276717873	4963.77719593675
61	0	Founder	48	Glycerol	1392348.1625693727	802373.9275210035	682577.9785544843
61	10	Founder	23	Glycerol	15539.60661716973	12223.576964636266	4969.672694225576
61.333333333333336	0	Founder	48	Glycerol	1405037.0338992972	809400.0508959584	688763.5899345144
61.333333333333336	10	Founder	23	Glycerol	15538.66847197958	12222.857364681046	4963.515234927539
61.666666666666664	0	Founder	48	Glycerol	1417995.8872715472	816573.1184994539	695847.7216397839
61.666666666666664	10	Founder	23	Glycerol	15545.120481045728	12227.806326739625	4961.645061472768
62	0	Founder	48	Glycerol	1430437.6549570444	823457.5623650886	702566.2883612049
62	10	Founder	23	Glycerol	15547.889733447271	12229.93044402228	4955.959804972831
62.333333333333336	0	Founder	48	Glycerol	1442388.2905221053	830068.0498730311	708901.4016779064
62.333333333333336	10	Founder	23	Glycerol	15546.67097383431	12228.995612244096	4940.581503126004
62.666666666666664	0	Founder	48	Glycerol	1454014.6850008327	836497.1358784141	715027.6082553848
62.666666666666664	10	Founder	23	Glycerol	15550.485199330093	12231.921252184216	4936.3595546705055
63	0	Founder	48	Glycerol	1464979.0731622686	842558.3149293292	720607.4386040885
63	10	Founder	23	Glycerol	15556.596128033292	12236.608503951786	4942.714353749329
63.333333333333336	0	Founder	48	Glycerol	1476467.359647291	848907.2124340376	726594.8302096813
63.333333333333336	10	Founder	23	Glycerol	15555.494664969445	12235.763654622473	4943.346170358155
63.666666666666664	0	Founder	48	Glycerol	1488496.9783613083	855553.2099470121	733267.8952671615
63.666666666666664	10	Founder	23	Glycerol	15568.77361101843	12245.948834548388	4954.71027857872
64	0	Founder	48	Glycerol	1500955.932116949	862434.1964794991	740129.3421456
64	10	Founder	23	Glycerol	15588.758258402819	12261.276995501228	4970.000104343935
64.33333333333333	0	Founder	48	Glycerol	1513357.852669859	869281.4741908048	747166.8442760353
64.33333333333333	10	Founder	23	Glycerol	15612.271233077421	12279.310746563042	4978.489344900921
64.66666666666667	0	Founder	48	Glycerol	1525882.8813084436	876194.5030988666	754642.7496036033
64.66666666666667	10	Founder	23	Glycerol	15625.03208513767	12289.097657082202	4978.84056139449
65	0	Founder	48	Glycerol	1537282.6192439985	882484.520184086	761130.5447017621
65	10	Founder	23	Glycerol	15634.549064318195	12296.39655622623	4978.014069585626
65.33333333333333	0	Founder	48	Glycerol	1548467.4799225254	888654.2086470578	767467.7213317142
65.33333333333333	10	Founder	23	Glycerol	15630.790080292429	12293.513675105847	4971.2748964528855
65.66666666666667	0	Founder	48	Glycerol	1559504.9510468794	894740.893477535	773792.5080026848
65.66666666666667	10	Founder	23	Glycerol	15626.37960445431	12290.131122778781	4963.822383845722
66	0	Founder	48	Glycerol	1570015.4178297832	900535.3982469907	779483.3258639309
66	10	Founder	23	Glycerol	15627.138263353392	12290.712967227162	4956.753706954411
66.33333333333333	0	Founder	48	Glycerol	1582357.6547599242	907337.8441920591	786132.8590115419
66.33333333333333	10	Founder	23	Glycerol	15642.462887915026	12302.465855986085	4959.106608211772
66.66666666666667	0	Founder	48	Glycerol	1594690.8743285974	914133.2555077171	792371.1060441148
66.66666666666667	10	Founder	23	Glycerol	15664.746508962337	12319.555285462047	4966.412267235828
67	0	Founder	48	Glycerol	1607258.8233400593	921055.8930130105	798858.3761001157
67	10	Founder	23	Glycerol	15691.57875963909	12340.132281373793	4979.090729012692
67.33333333333333	0	Founder	48	Glycerol	1619454.599026252	927771.5150227055	804797.5738287267
67.33333333333333	10	Founder	23	Glycerol	15713.821754651313	12357.189226076805	4992.754664321896
67.66666666666667	0	Founder	48	Glycerol	1632670.7961007084	935046.8097277029	811903.9181940564
67.66666666666667	10	Founder	23	Glycerol	15725.37545073766	12366.048891035842	5002.727609693063
68	0	Founder	48	Glycerol	1643779.3115492433	941160.0857039433	817681.3614539695
68	10	Founder	23	Glycerol	15727.349034151443	12367.56226827967	5003.7346222758215
68.33333333333333	0	Founder	48	Glycerol	1654906.661950347	947282.11348039	823419.39943353
68.33333333333333	10	Founder	23	Glycerol	15727.253404231422	12367.488937743514	4997.018488765667
68.66666666666667	0	Founder	48	Glycerol	1665447.2721461863	953079.8502907386	828725.8505188084
68.66666666666667	10	Founder	23	Glycerol	15725.894989864944	12366.447282910749	4990.1214093561875
69	0	Founder	48	Glycerol	1675556.56290881	958639.001930851	833767.4404862598
69	10	Founder	23	Glycerol	15731.812784349315	12370.985130238885	4980.450587405716
69.33333333333333	0	Founder	48	Glycerol	1685179.5049967398	963929.4939086678	838618.2889653915
69.33333333333333	10	Founder	23	Glycerol	15739.510510153419	12376.887790198361	4973.205989923714
69.66666666666667	0	Founder	48	Glycerol	1695393.5430048786	969543.6706076999	844041.7849581754
69.66666666666667	10	Founder	23	Glycerol	15749.894960626267	12384.850532176522	4971.617464545468
70	0	Founder	48	Glycerol	1706939.4575316177	975888.3310810636	851037.823158289
70	10	Founder	23	Glycerol	15758.882218264409	12391.741808637862	4977.265139718212
70.33333333333333	0	Founder	48	Glycerol	1718653.0193010562	982323.4079306625	858093.6375862161
70.33333333333333	10	Founder	23	Glycerol	15761.492070620683	12393.742980767196	4979.278265802444
70.66666666666667	0	Founder	48	Glycerol	1730795.4467415414	988992.2872027698	865619.0667499092
70.66666666666667	10	Founder	23	Glycerol	15744.686141300826	12380.85645325391	4981.578072835073
71	0	Founder	48	Glycerol	1740576.4779964653	994362.9114645363	871339.7638718543
71	10	Founder	23	Glycerol	15733.17208607678	12372.027455761396	4986.693041505181
71.33333333333333	0	Founder	48	Glycerol	1747924.114151232	998396.6195742727	875728.740635186
71.33333333333333	10	Founder	23	Glycerol	15713.875318459866	12357.230300527088	4985.750734994477
71.66666666666667	0	Founder	48	Glycerol	1749953.243379337	999510.4551874794	876918.4644531086
71.66666666666667	10	Founder	23	Glycerol	15708.923972535278	12353.433434587143	4983.496985141608
0	0	rtg2∆	144	Glycerol	8199.25298360763	10034.456716692752	3761.9676610349898
0	10	rtg2∆	72	Glycerol	12932.909383038637	10034.456716692752	7270.586301700228
0.3333333333333333	0	rtg2∆	144	Glycerol	8210.321279632166	10048.306191035606	3758.6770004803575
0.3333333333333333	10	rtg2∆	72	Glycerol	12959.456109075754	10054.50133506249	7289.420280555852
0.6666666666666666	0	rtg2∆	144	Glycerol	8251.424886479683	10099.74173607534	3747.4559320768117
0.6666666666666666	10	rtg2∆	72	Glycerol	13022.529675579717	10102.1218407729	7325.363916421455
1.3333333333333333	0	rtg2∆	144	Glycerol	8356.267828535078	10230.964287443261	3780.6358908994966
1.3333333333333333	10	rtg2∆	72	Glycerol	13154.069624175008	10201.414572209918	7415.570690118783
1.6666666666666667	0	rtg2∆	144	Glycerol	8408.948300043558	10296.913690560163	3795.3956648025323
1.6666666666666667	10	rtg2∆	72	Glycerol	13228.129799371436	10257.307057708309	7484.592521918218
2	0	rtg2∆	144	Glycerol	8457.189003127125	10357.313179841409	3824.589511996514
2	10	rtg2∆	72	Glycerol	13283.560829227852	10299.13482040061	7554.828647017943
2.3333333333333335	0	rtg2∆	144	Glycerol	8493.17432770553	10402.373425554979	3855.908016598563
2.3333333333333335	10	rtg2∆	72	Glycerol	13325.42728666851	10330.723775312328	7619.743713673998
2.6666666666666665	0	rtg2∆	144	Glycerol	8536.100937241385	10456.131032428017	3890.7303387557686
2.6666666666666665	10	rtg2∆	72	Glycerol	13365.765132543454	10361.156850634763	7691.131123096612
3	0	rtg2∆	144	Glycerol	8577.48032695863	10507.956769930615	3924.7088741721923
3	10	rtg2∆	72	Glycerol	13407.694439568286	10392.788002130772	7748.815957349774
3.3333333333333335	0	rtg2∆	144	Glycerol	8621.741250553729	10563.3976951987	3960.4966121214975
3.3333333333333335	10	rtg2∆	72	Glycerol	13458.862826706245	10431.385454747893	7803.041866609938
3.6666666666666665	0	rtg2∆	144	Glycerol	8668.034670239607	10621.391336026321	3995.5099430879222
3.6666666666666665	10	rtg2∆	72	Glycerol	13513.722503180097	10472.762960838172	7852.277529925887
4	0	rtg2∆	144	Glycerol	8717.232315397016	10683.030826166778	4032.011158471587
4	10	rtg2∆	72	Glycerol	13580.016657077053	10522.758831753295	7908.35952908896
4.333333333333333	0	rtg2∆	144	Glycerol	8784.874684240847	10767.792342632887	4065.8213663999027
4.333333333333333	10	rtg2∆	72	Glycerol	13651.175641446278	10576.416246606841	7960.376613669111
4.666666666666667	0	rtg2∆	144	Glycerol	8866.549597537292	10870.157291250884	4114.674366065827
4.666666666666667	10	rtg2∆	72	Glycerol	13734.70551938581	10639.392369642306	8026.565416294381
5	0	rtg2∆	144	Glycerol	8964.971371664193	10993.539510192148	4180.896680420108
5	10	rtg2∆	72	Glycerol	13837.322907973798	10716.745196525419	8103.9148194075615
5.333333333333333	0	rtg2∆	144	Glycerol	9094.914049797131	11156.483007974788	4275.959060726835
5.333333333333333	10	rtg2∆	72	Glycerol	13975.662164371834	10821.000800249998	8186.033716530367
5.666666666666667	0	rtg2∆	144	Glycerol	9259.58044847181	11363.043695022283	4401.104346455363
5.666666666666667	10	rtg2∆	72	Glycerol	14146.526727700268	10949.730069753776	8281.596530646406
6	0	rtg2∆	144	Glycerol	9432.546991425903	11580.104899058619	4515.75391107604
6	10	rtg2∆	72	Glycerol	14348.440130253211	11101.797845996585	8399.302748265167
6.333333333333333	0	rtg2∆	144	Glycerol	9647.03065506178	11849.391012172626	4666.027241255988
6.333333333333333	10	rtg2∆	72	Glycerol	14592.191118434783	11285.298590925415	8540.908738833212
6.666666666666667	0	rtg2∆	144	Glycerol	9895.55890167767	12161.58808956413	4846.206233180971
6.666666666666667	10	rtg2∆	72	Glycerol	14881.054862599236	11502.65490486571	8714.789961487792
7	0	rtg2∆	144	Glycerol	10177.574974978123	12516.064724695589	5056.513628331019
7	10	rtg2∆	72	Glycerol	15216.52369214506	11754.937597715636	8930.038133401482
7.333333333333333	0	rtg2∆	144	Glycerol	10493.887114033687	12913.911145210699	5294.945066253007
7.333333333333333	10	rtg2∆	72	Glycerol	15603.35092541709	12045.658560724592	9177.290663601594
7.666666666666667	0	rtg2∆	144	Glycerol	10859.784524979594	13374.459136584786	5577.695595644809
7.666666666666667	10	rtg2∆	72	Glycerol	16046.713363180796	12378.63145684175	9460.586466538007
8	0	rtg2∆	144	Glycerol	11286.339985806775	13911.794755276358	5909.750967569828
8	10	rtg2∆	72	Glycerol	16566.1578168932	12768.4301690569	9794.052664561903
8.333333333333334	0	rtg2∆	144	Glycerol	11774.80571229925	14527.677715697842	6285.411507549977
8.333333333333334	10	rtg2∆	72	Glycerol	17148.718565026124	13205.203157193962	10177.014966466128
8.666666666666666	0	rtg2∆	144	Glycerol	12333.26948919065	15232.518656543592	6714.395648438654
8.666666666666666	10	rtg2∆	72	Glycerol	17823.497966821156	13710.620708644343	10630.350790746632
9	0	rtg2∆	144	Glycerol	12961.839305591562	16026.695751775376	7212.638896921438
9	10	rtg2∆	72	Glycerol	18588.89104578857	14283.289395377946	11163.298139933824
9.333333333333334	0	rtg2∆	144	Glycerol	13689.241492366744	16946.820102062324	7782.999517880722
9.333333333333334	10	rtg2∆	72	Glycerol	19469.31862527957	14941.247363311737	11773.908798508619
9.666666666666666	0	rtg2∆	144	Glycerol	14496.225790560962	17968.89273056309	8415.782778323493
9.666666666666666	10	rtg2∆	72	Glycerol	20439.995689161595	15665.727650952973	12475.75921859102
10	0	rtg2∆	144	Glycerol	15399.396066938176	19114.298959267144	9124.34074923965
10	10	rtg2∆	72	Glycerol	21521.310455603558	16471.70061465047	13249.62688708904
10.333333333333334	0	rtg2∆	144	Glycerol	16398.783852625267	20383.482327146998	9898.69519157131
10.333333333333334	10	rtg2∆	72	Glycerol	22717.6870574071	17362.174334181553	14120.79257901046
10.666666666666666	0	rtg2∆	144	Glycerol	17517.572820777692	21806.355107989602	10744.267985596636
10.666666666666666	10	rtg2∆	72	Glycerol	24039.245906893397	18344.364301908456	15078.04520571485
11	0	rtg2∆	144	Glycerol	18723.58540065072	23342.439369203028	11648.4953927683
11	10	rtg2∆	72	Glycerol	25479.900300994977	19413.421121832846	16153.051394477045
11.333333333333334	0	rtg2∆	144	Glycerol	20016.035437492283	24991.079575797892	12590.178554396049
11.333333333333334	10	rtg2∆	72	Glycerol	27037.93792920506	20567.76347731636	17310.28370172556
11.666666666666666	0	rtg2∆	144	Glycerol	21439.807231977087	26809.99299817081	13612.15646719412
11.666666666666666	10	rtg2∆	72	Glycerol	28750.38041687184	21834.451354929883	18581.647084883312
12	0	rtg2∆	144	Glycerol	22961.6095571534	28757.13690784506	14677.520881266182
12	10	rtg2∆	72	Glycerol	30578.701419659505	23184.62557709319	19920.23544337406
12.333333333333334	0	rtg2∆	144	Glycerol	24604.17440083574	30862.04144144901	15801.94779708363
12.333333333333334	10	rtg2∆	72	Glycerol	32524.826652222775	24619.421807745784	21339.66766760285
12.666666666666666	0	rtg2∆	144	Glycerol	26349.02858480478	33101.47757583236	16945.337800568264
12.666666666666666	10	rtg2∆	72	Glycerol	34614.60613160686	26157.57048678356	22809.998923663123
13	0	rtg2∆	144	Glycerol	28273.47345007945	35575.26161233986	18179.892147173887
13	10	rtg2∆	72	Glycerol	36897.12199492773	27834.741669847434	24381.568630159094
13.333333333333334	0	rtg2∆	144	Glycerol	30301.62538369828	38186.44218879502	19440.999689795084
13.333333333333334	10	rtg2∆	72	Glycerol	39314.14956069589	29607.72356667893	26010.50230413862
13.666666666666666	0	rtg2∆	144	Glycerol	32451.39362952013	40958.47737312803	20734.592770866522
13.666666666666666	10	rtg2∆	72	Glycerol	41888.3869484206	31492.816995649784	27697.013505694827
14	0	rtg2∆	144	Glycerol	34690.00344617549	43849.44712952216	22031.18782937007
14	10	rtg2∆	72	Glycerol	44610.13846754431	33482.56144886204	29427.681018304425
14.333333333333334	0	rtg2∆	144	Glycerol	37100.64356588561	46967.25403398609	23407.54972455539
14.333333333333334	10	rtg2∆	72	Glycerol	47500.64275373875	35592.1156553262	31242.89712298074
14.666666666666666	0	rtg2∆	144	Glycerol	39560.6408403713	50153.582705147004	24739.178642904164
14.666666666666666	10	rtg2∆	72	Glycerol	50464.956536691774	37751.966681679085	33037.84402034078
15	0	rtg2∆	144	Glycerol	42134.23133767116	53491.798964971706	26077.14461739284
15	10	rtg2∆	72	Glycerol	53558.180231223574	40002.12213701869	34833.7828995751
15.333333333333334	0	rtg2∆	144	Glycerol	44868.37643930933	57043.27841693991	27454.569828526626
15.333333333333334	10	rtg2∆	72	Glycerol	56784.0508444342	42345.06462410445	36642.86386507368
15.666666666666666	0	rtg2∆	144	Glycerol	47722.42251012756	60755.67817102322	28846.38302202523
15.666666666666666	10	rtg2∆	72	Glycerol	60139.32030838423	44778.20796615365	38460.88607965177
16	0	rtg2∆	144	Glycerol	50668.744242819696	64593.328945199275	30220.681422232443
16	10	rtg2∆	72	Glycerol	63565.562313862225	47259.06620559459	40230.0266235401
16.333333333333332	0	rtg2∆	144	Glycerol	53717.54009008548	68569.72310091155	31596.248351376904
16.333333333333332	10	rtg2∆	72	Glycerol	67094.09193567027	49810.245193325936	41980.286350485716
16.666666666666668	0	rtg2∆	144	Glycerol	56888.85940584942	72711.28824497577	32968.599544535515
16.666666666666668	10	rtg2∆	72	Glycerol	70729.08361255938	52434.64030997625	43765.442778980374
17	0	rtg2∆	144	Glycerol	60091.86137307238	76899.48662218278	34298.82559545939
17	10	rtg2∆	72	Glycerol	74407.82129887961	55086.940380238186	45510.37850410205
17.333333333333332	0	rtg2∆	144	Glycerol	63444.869482891	81289.19272592619	35663.595233473134
17.333333333333332	10	rtg2∆	72	Glycerol	78213.5048486066	57827.07044898355	47279.11452477383
17.666666666666668	0	rtg2∆	144	Glycerol	66871.44453985438	85780.58724340325	37003.72598236405
17.666666666666668	10	rtg2∆	72	Glycerol	82083.74818906348	60610.021213373584	49073.86520392724
18	0	rtg2∆	144	Glycerol	70397.32568978288	90407.53507696782	38344.115968803766
18	10	rtg2∆	72	Glycerol	86043.66566241648	63453.81559068236	50870.065472145114
18.333333333333332	0	rtg2∆	144	Glycerol	73967.88651158173	95098.41250699811	39643.86533894525
18.333333333333332	10	rtg2∆	72	Glycerol	90038.96920645135	66319.4687389106	52640.444023972144
18.666666666666668	0	rtg2∆	144	Glycerol	77722.48780109956	100036.55084488113	41059.09121006598
18.666666666666668	10	rtg2∆	72	Glycerol	94162.73408552202	69273.68988217856	54512.21331053815
19	0	rtg2∆	144	Glycerol	81561.82264065502	105091.66490770712	42476.03776191149
19	10	rtg2∆	72	Glycerol	98332.99723866573	72257.69694289916	56347.770383647025
19.333333333333332	0	rtg2∆	144	Glycerol	85499.23515440171	110281.4566065907	43940.742771623816
19.333333333333332	10	rtg2∆	72	Glycerol	102576.38754171738	75290.54992399074	58166.763113225024
19.666666666666668	0	rtg2∆	144	Glycerol	89543.66984463831	115617.89091012508	45432.46057319576
19.666666666666668	10	rtg2∆	72	Glycerol	106895.54907941476	78374.10690344058	60000.966147414256
20	0	rtg2∆	144	Glycerol	93711.10554928101	121122.27253569206	47014.68182173076
20	10	rtg2∆	72	Glycerol	111285.18625875156	81504.55833886474	61874.536829148674
20.333333333333332	0	rtg2∆	144	Glycerol	97887.5360289373	126644.04307376237	48555.02770195791
20.333333333333332	10	rtg2∆	72	Glycerol	115715.98011308513	84661.00555941276	63727.87674746713
20.666666666666668	0	rtg2∆	144	Glycerol	102120.3577488341	132245.76088973464	50122.17338254027
20.666666666666668	10	rtg2∆	72	Glycerol	120163.83875117163	87826.35248526392	65573.90595610267
21	0	rtg2∆	144	Glycerol	106449.75518051663	137980.6729241448	51739.50129751078
21	10	rtg2∆	72	Glycerol	124690.05331294992	91044.23971319024	67523.45613811367
21.333333333333332	0	rtg2∆	144	Glycerol	110833.32527008145	143792.67370632538	53421.929569668486
21.333333333333332	10	rtg2∆	72	Glycerol	129196.52304770591	94244.97985778314	69466.69427632591
21.666666666666668	0	rtg2∆	144	Glycerol	115293.54935354019	149711.59752635533	55124.2273653701
21.666666666666668	10	rtg2∆	72	Glycerol	133784.23635041714	97500.35135130564	71417.13934602916
22	0	rtg2∆	144	Glycerol	119817.77381482066	155720.69853873758	56857.41622030622
22	10	rtg2∆	72	Glycerol	138375.24996570547	100755.07027183865	73422.8445848671
22.333333333333332	0	rtg2∆	144	Glycerol	124402.69661093087	161815.61029941565	58671.88534204475
22.333333333333332	10	rtg2∆	72	Glycerol	143031.25366557218	104052.90803017716	75541.46875162228
22.666666666666668	0	rtg2∆	144	Glycerol	129034.03961095377	167977.34422582842	60541.669081798194
22.666666666666668	10	rtg2∆	72	Glycerol	147675.30556319852	107339.41480137606	77637.6387358381
23	0	rtg2∆	144	Glycerol	133718.39498637524	174214.65277647896	62435.59548953323
23	10	rtg2∆	72	Glycerol	152402.71649742164	110682.06931637131	79808.10161559294
23.333333333333332	0	rtg2∆	144	Glycerol	138498.05425413366	180583.9098968657	64417.15838638745
23.333333333333332	10	rtg2∆	72	Glycerol	157221.64295190698	114086.57362622222	82111.41431406856
23.666666666666668	0	rtg2∆	144	Glycerol	143310.5875032583	187001.95409811815	66421.562652219
23.666666666666668	10	rtg2∆	72	Glycerol	162069.58840252284	117508.7582227417	84394.39520781605
24	0	rtg2∆	144	Glycerol	148252.53007991627	193597.60845570808	68500.08044346364
24	10	rtg2∆	72	Glycerol	166991.08444576943	120980.0572055112	86692.97395482205
24.333333333333332	0	rtg2∆	144	Glycerol	153319.4356947421	200365.159732229	70699.42325721117
24.333333333333332	10	rtg2∆	72	Glycerol	172076.27938973682	124563.93995915249	89157.93874172731
24.666666666666668	0	rtg2∆	144	Glycerol	158438.44536618856	207207.39576823203	73012.75314196058
24.666666666666668	10	rtg2∆	72	Glycerol	177186.5723806498	128162.65217505474	91675.53808974133
25	0	rtg2∆	144	Glycerol	163568.52207934667	214069.39777705524	75385.998686253
25	10	rtg2∆	72	Glycerol	182237.15430381164	131716.58243311517	94133.28749077975
25.333333333333332	0	rtg2∆	144	Glycerol	168698.4505146958	220936.02736922208	77778.57186386865
25.333333333333332	10	rtg2∆	72	Glycerol	187270.8200477399	135255.9832516685	96602.81929084721
25.666666666666668	0	rtg2∆	144	Glycerol	173848.84034615225	227834.75558234562	80220.29557677156
25.666666666666668	10	rtg2∆	72	Glycerol	192370.127777059	138838.94094206073	99233.13728684427
26	0	rtg2∆	144	Glycerol	179041.66024965196	234794.9564482312	82707.40134658919
26	10	rtg2∆	72	Glycerol	197455.8952368756	142409.84984888046	101845.71768186335
26.333333333333332	0	rtg2∆	144	Glycerol	184331.94635160628	241890.45025792147	85293.52593890703
26.333333333333332	10	rtg2∆	72	Glycerol	202607.26664310953	146024.30961932542	104596.60475759812
26.666666666666668	0	rtg2∆	144	Glycerol	189659.18161535732	249040.1153278239	87955.49805521726
26.666666666666668	10	rtg2∆	72	Glycerol	207823.2919995129	149681.62502599848	107465.88221392735
27	0	rtg2∆	144	Glycerol	195152.08237383005	256416.8334842169	90809.00938798576
27	10	rtg2∆	72	Glycerol	213193.90680876683	153444.7643102598	110492.18829602943
27.333333333333332	0	rtg2∆	144	Glycerol	200606.12886006257	263745.9788302496	93719.29151279839
27.333333333333332	10	rtg2∆	72	Glycerol	218518.9878368409	157173.49032650274	113384.94232706491
27.666666666666668	0	rtg2∆	144	Glycerol	205963.61634996295	270949.7189671939	96667.60700134632
27.666666666666668	10	rtg2∆	72	Glycerol	223819.10189494007	160882.3161521647	116386.10635223259
28	0	rtg2∆	144	Glycerol	211400.07502510748	278263.9390058087	99699.0784750085
28	10	rtg2∆	72	Glycerol	229130.58484438816	164596.73656406606	119386.79108253414
28.333333333333332	0	rtg2∆	144	Glycerol	216808.88348501746	285545.1439290439	102761.63682403762
28.333333333333332	10	rtg2∆	72	Glycerol	234529.68163600544	168370.06262656633	122466.86229715173
28.666666666666668	0	rtg2∆	144	Glycerol	222289.30585444559	292926.90735237417	105964.27111830408
28.666666666666668	10	rtg2∆	72	Glycerol	240068.84993089442	172238.8634464076	125645.48039115035
29	0	rtg2∆	144	Glycerol	228011.7508115746	300639.0123783863	109491.71872515425
29	10	rtg2∆	72	Glycerol	245808.39190398497	176245.09149349012	129232.9974342815
29.333333333333332	0	rtg2∆	144	Glycerol	234025.83014197403	308748.82653390785	113307.69364562575
29.333333333333332	10	rtg2∆	72	Glycerol	251911.94793317423	180502.6543535105	133045.62730361495
30	0	rtg2∆	144	Glycerol	243061.8426532401	320942.37987382506	117464.54922595006
30	10	rtg2∆	72	Glycerol	261263.69023142298	187020.66515420872	137685.14449880164
30.333333333333332	0	rtg2∆	144	Glycerol	249891.58148197824	330165.46585632314	122063.13641135585
30.333333333333332	10	rtg2∆	72	Glycerol	268222.33714560536	191866.65865981413	142147.23123283405
30.666666666666668	0	rtg2∆	144	Glycerol	256649.6438393152	339297.3217901592	126454.25373693834
30.666666666666668	10	rtg2∆	72	Glycerol	275074.4649686804	196635.18006746573	146417.39939942752
31	0	rtg2∆	144	Glycerol	263305.1197809176	348295.82761414995	130773.66109561565
31	10	rtg2∆	72	Glycerol	281874.5165521509	201364.31371057188	150550.5612395712
31.333333333333332	0	rtg2∆	144	Glycerol	269807.3982394767	357092.12954721623	135235.54272543703
31.333333333333332	10	rtg2∆	72	Glycerol	288502.7821155501	205971.03497095458	154788.8190140326
31.666666666666668	0	rtg2∆	144	Glycerol	276046.3266876517	365536.6403790101	139097.3987823401
31.666666666666668	10	rtg2∆	72	Glycerol	294876.242272513	210397.9880989068	158582.77497120708
32	0	rtg2∆	144	Glycerol	282586.81148752227	374393.9062875873	143155.33430125855
32	10	rtg2∆	72	Glycerol	301525.70611602365	215013.91902777474	162457.55575323966
32.333333333333336	0	rtg2∆	144	Glycerol	289260.92403116357	383436.8711849746	147348.66669663507
32.333333333333336	10	rtg2∆	72	Glycerol	308295.53468255466	219710.60300530717	166435.8765941668
32.666666666666664	0	rtg2∆	144	Glycerol	296008.872659337	392584.6344999269	151618.65113138736
32.666666666666664	10	rtg2∆	72	Glycerol	315172.88822392095	224479.0547848292	170460.64165337637
33	0	rtg2∆	144	Glycerol	303264.7769190836	402426.2146722644	156024.55863324058
33	10	rtg2∆	72	Glycerol	322573.0575597609	229606.89136307014	174638.63245148305
33.333333333333336	0	rtg2∆	144	Glycerol	310539.93892718595	412299.21560913755	160736.30615026553
33.333333333333336	10	rtg2∆	72	Glycerol	330024.3539818299	234766.97085277128	179026.06940786584
33.666666666666664	0	rtg2∆	144	Glycerol	317581.0007342045	421859.46259618626	165252.45027315782
33.666666666666664	10	rtg2∆	72	Glycerol	337281.0642715315	239789.29669685118	183322.5603028103
34	0	rtg2∆	144	Glycerol	324852.26614392345	431737.26319784846	169970.3620458284
34	10	rtg2∆	72	Glycerol	344774.56531589956	244972.46591106214	187770.06272327172
34.333333333333336	0	rtg2∆	144	Glycerol	332389.70336979453	441981.88165407936	174754.23132762403
34.333333333333336	10	rtg2∆	72	Glycerol	352457.31363086967	250283.40184641277	192221.1454127448
34.666666666666664	0	rtg2∆	144	Glycerol	339943.8322362562	452254.4126149322	179646.03405646753
34.666666666666664	10	rtg2∆	72	Glycerol	360094.33251084294	255559.65128767144	196613.42013557706
35	0	rtg2∆	144	Glycerol	347901.4906971321	463081.2191642497	184829.4094978891
35	10	rtg2∆	72	Glycerol	368076.60868725687	261071.22752820523	201219.62715242666
35.333333333333336	0	rtg2∆	144	Glycerol	356046.00307218253	474167.99861875275	190096.88677317402
35.333333333333336	10	rtg2∆	72	Glycerol	376240.3575572251	266704.79405455507	205914.3677950633
35.666666666666664	0	rtg2∆	144	Glycerol	364349.7254524818	485477.35696910095	195513.34784143046
35.666666666666664	10	rtg2∆	72	Glycerol	384635.32607249834	272494.50323312246	210804.892153006
36	0	rtg2∆	144	Glycerol	372362.80117203394	496396.34586132644	200568.10659579944
36	10	rtg2∆	72	Glycerol	392764.48487468105	278097.66520410654	215431.82798319912
36.333333333333336	0	rtg2∆	144	Glycerol	380900.0664303697	508035.4134247997	205905.01129003367
36.333333333333336	10	rtg2∆	72	Glycerol	401258.90135629964	283949.2681337063	220221.71399720744
36.666666666666664	0	rtg2∆	144	Glycerol	389484.6106716309	519744.8349165865	211357.79317167023
36.666666666666664	10	rtg2∆	72	Glycerol	409848.1695226321	289862.8371850791	224975.63037062867
37	0	rtg2∆	144	Glycerol	398209.94774698943	531652.2283204454	216819.6844249509
37	10	rtg2∆	72	Glycerol	418544.03853104723	295846.4164158171	229763.11517377757
37.333333333333336	0	rtg2∆	144	Glycerol	407011.5792656461	543669.6663171371	222258.30507829785
37.333333333333336	10	rtg2∆	72	Glycerol	427221.92340382136	301814.29984303296	234456.99220163518
37.666666666666664	0	rtg2∆	144	Glycerol	416253.3139851538	556294.2743478431	228279.67800039958
37.666666666666664	10	rtg2∆	72	Glycerol	436481.4459372816	308178.6017499558	239746.7704085551
38	0	rtg2∆	144	Glycerol	425238.58355991263	568574.5662729441	233972.07070799643
38	10	rtg2∆	72	Glycerol	445520.5180574349	314387.8922708651	244931.8759909317
38.333333333333336	0	rtg2∆	144	Glycerol	434185.0741688112	580807.6385973556	239583.6988781678
38.333333333333336	10	rtg2∆	72	Glycerol	454508.3095908362	320558.60887649294	250210.1294294846
38.666666666666664	0	rtg2∆	144	Glycerol	443490.89127474016	593538.0342343039	245651.64655428057
38.666666666666664	10	rtg2∆	72	Glycerol	463682.5214215126	326853.94357768283	255585.64469554843
39	0	rtg2∆	144	Glycerol	452634.6588094811	606052.5794477573	251547.6965046333
39	10	rtg2∆	72	Glycerol	472748.7138991319	333071.8762452265	260841.09379538827
39.333333333333336	0	rtg2∆	144	Glycerol	461853.30962325307	618675.3504606065	257365.15356711127
39.333333333333336	10	rtg2∆	72	Glycerol	481706.1224042198	339212.06244264444	265874.80818926916
39.666666666666664	0	rtg2∆	144	Glycerol	471837.6517080741	632352.9238063527	264254.0597292811
39.666666666666664	10	rtg2∆	72	Glycerol	491417.7043881881	345865.7696302498	271698.6892776729
40	0	rtg2∆	144	Glycerol	482668.03089311	647196.8180715548	272126.70876383025
40	10	rtg2∆	72	Glycerol	501902.03248424805	353044.95603525906	278390.15056506236
40.666666666666664	0	rtg2∆	144	Glycerol	497217.68291484134	667149.996699219	279870.9390947276
40.666666666666664	10	rtg2∆	72	Glycerol	516235.2661592422	362853.210716573	285310.10332164395
41	0	rtg2∆	144	Glycerol	508362.29677112907	682442.4306538482	288153.21721844835
41	10	rtg2∆	72	Glycerol	527012.6588073757	370223.38024778164	292484.78830372094
41.333333333333336	0	rtg2∆	144	Glycerol	519280.0878852028	697430.912159507	296078.34423868725
41.333333333333336	10	rtg2∆	72	Glycerol	537374.9125217593	377305.845660725	299087.32491748047
41.666666666666664	0	rtg2∆	144	Glycerol	529705.8970502743	711750.5734508195	303364.57268786995
41.666666666666664	10	rtg2∆	72	Glycerol	547361.4595279264	384128.0565365931	305303.73946267046
42	0	rtg2∆	144	Glycerol	539631.565279431	725389.1733084351	310126.49315197056
42	10	rtg2∆	72	Glycerol	556758.5859107345	390544.5634619026	310852.1790859524
42.333333333333336	0	rtg2∆	144	Glycerol	549876.3341489853	739472.1379781418	317275.86997602874
42.333333333333336	10	rtg2∆	72	Glycerol	566562.0246929455	397235.414619123	316943.82912942563
42.666666666666664	0	rtg2∆	144	Glycerol	559358.9775033676	752512.6918558151	323650.7753288214
42.666666666666664	10	rtg2∆	72	Glycerol	575580.436040575	403387.74319012277	322405.5656861869
43	0	rtg2∆	144	Glycerol	569831.9740523895	766920.9380511236	331165.5982529497
43	10	rtg2∆	72	Glycerol	585772.4977475328	410337.6247132247	329119.1954159846
43.333333333333336	0	rtg2∆	144	Glycerol	581003.031821658	782296.0843038339	339555.4313095778
43.333333333333336	10	rtg2∆	72	Glycerol	596466.6656335648	417626.40543905145	336400.1572031256
44	0	rtg2∆	144	Glycerol	597196.0029271408	804594.8121568541	349287.00186269276
44	10	rtg2∆	72	Glycerol	612061.585071895	428249.1121710618	344964.6293714752
44.333333333333336	0	rtg2∆	144	Glycerol	609072.5951468701	820958.2563170276	358541.4557311543
44.333333333333336	10	rtg2∆	72	Glycerol	623308.9431663374	435905.9016753996	352785.00850062794
44.666666666666664	0	rtg2∆	144	Glycerol	620645.2065466671	836909.7612329442	367447.6811629353
44.666666666666664	10	rtg2∆	72	Glycerol	634270.6979876646	443364.6998106778	360231.96697804943
45	0	rtg2∆	144	Glycerol	631228.2440796425	851503.0934032343	375237.60632779705
45	10	rtg2∆	72	Glycerol	644131.7864269943	450071.6091298657	366715.90180755453
45.333333333333336	0	rtg2∆	144	Glycerol	641428.9582158459	865574.4184710161	382562.37050580635
45.333333333333336	10	rtg2∆	72	Glycerol	653733.3821162774	456599.38313624746	372901.2931701719
45.666666666666664	0	rtg2∆	144	Glycerol	651197.3236451132	879054.0454718871	389374.0200396119
45.666666666666664	10	rtg2∆	72	Glycerol	663014.0201644973	462906.50749508257	378622.4346319785
46	0	rtg2∆	144	Glycerol	661112.3499551326	892740.6888862172	396297.7365233933
46	10	rtg2∆	72	Glycerol	672345.7834951445	469245.9912263259	384249.26281811623
46.333333333333336	0	rtg2∆	144	Glycerol	671226.5743708038	906707.044883892	403341.0265302658
46.333333333333336	10	rtg2∆	72	Glycerol	681921.9304589098	475749.04463156144	390080.6005517081
46.666666666666664	0	rtg2∆	144	Glycerol	681674.4426826308	921139.0703019449	410742.1259443559
46.666666666666664	10	rtg2∆	72	Glycerol	691847.4229756753	482486.75232982985	396126.15290182404
47	0	rtg2∆	144	Glycerol	692007.6769977086	935417.6252362641	417995.0106430926
47	10	rtg2∆	72	Glycerol	701669.6168662569	489151.78780775034	401907.9859327118
47.333333333333336	0	rtg2∆	144	Glycerol	702562.6593013767	950007.5276373049	425222.811558584
47.333333333333336	10	rtg2∆	72	Glycerol	711741.5869821814	495983.71756688104	407843.19293013023
47.666666666666664	0	rtg2∆	144	Glycerol	713407.8906851955	965003.7521055952	432562.63918847876
47.666666666666664	10	rtg2∆	72	Glycerol	722178.4270395458	503060.4098495747	414007.51939080737
48	0	rtg2∆	144	Glycerol	724384.0699456023	980186.2477684754	439860.32536975114
48	10	rtg2∆	72	Glycerol	732696.3164487268	510189.2850233093	420022.26758416666
48.333333333333336	0	rtg2∆	144	Glycerol	735385.127213719	995408.3299640879	446865.1483792279
48.333333333333336	10	rtg2∆	72	Glycerol	743236.9364668016	517330.8154350706	425710.094779441
48.666666666666664	0	rtg2∆	144	Glycerol	745871.3562468591	1009922.8012832523	453284.3994040891
48.666666666666664	10	rtg2∆	72	Glycerol	753213.8459159756	524087.9170742605	430934.43373002025
49	0	rtg2∆	144	Glycerol	757067.9428830446	1025425.5594191548	460393.8551269516
49	10	rtg2∆	72	Glycerol	763722.5287415874	531202.5819385218	436560.3255722474
49.333333333333336	0	rtg2∆	144	Glycerol	768260.8031343853	1040928.2952799278	467454.88388975523
49.333333333333336	10	rtg2∆	72	Glycerol	774252.762629268	538329.2059708191	442155.40557324374
49.666666666666664	0	rtg2∆	144	Glycerol	779234.2527574877	1056132.050957267	474550.2046085135
49.666666666666664	10	rtg2∆	72	Glycerol	784649.8228689503	545363.1525808779	447802.16781543905
50	0	rtg2∆	144	Glycerol	790702.5349315231	1072026.52711874	481998.6320936686
50	10	rtg2∆	72	Glycerol	795601.7820588809	552769.8056701629	453897.1727125085
50.333333333333336	0	rtg2∆	144	Glycerol	802824.4169686378	1088832.477240559	490086.39884069486
50.333333333333336	10	rtg2∆	72	Glycerol	807010.6518689562	560482.5558136307	460227.6810399075
50.666666666666664	0	rtg2∆	144	Glycerol	814399.651267279	1104885.857869231	497808.2063476073
50.666666666666664	10	rtg2∆	72	Glycerol	817908.8480841145	567847.3454616907	466210.4732048736
51	0	rtg2∆	144	Glycerol	825624.3346311633	1120457.9544892358	505284.17422847095
51	10	rtg2∆	72	Glycerol	828321.5639621594	574881.5997729519	471973.1115021622
51.333333333333336	0	rtg2∆	144	Glycerol	837049.7462606578	1136313.3966852678	512977.4944135752
51.333333333333336	10	rtg2∆	72	Glycerol	838804.0915602497	581960.6215114053	478072.44844686
51.666666666666664	0	rtg2∆	144	Glycerol	848404.8429515555	1152076.0673632042	520918.31461916474
51.666666666666664	10	rtg2∆	72	Glycerol	849164.4247678751	588954.7938048897	484212.39180378907
52	0	rtg2∆	144	Glycerol	859380.9748786207	1167317.1708175044	528624.6552315298
52	10	rtg2∆	72	Glycerol	859364.7126861411	595838.686666813	490597.2085814229
52.333333333333336	0	rtg2∆	144	Glycerol	870189.438697911	1182329.720222657	536312.6616349432
52.333333333333336	10	rtg2∆	72	Glycerol	869387.8054734766	602600.8623237308	496941.9409745745
52.666666666666664	0	rtg2∆	144	Glycerol	881437.0606674876	1197956.6812553648	544448.0065952179
52.666666666666664	10	rtg2∆	72	Glycerol	879711.2557610709	609563.4932215005	503429.67675702844
53	0	rtg2∆	144	Glycerol	892206.780304685	1212923.8553778692	552102.6500053975
53	10	rtg2∆	72	Glycerol	889559.4053500219	616203.5173877787	509334.4917000037
53.333333333333336	0	rtg2∆	144	Glycerol	902561.1867780539	1227317.6689784087	559456.5800096869
53.333333333333336	10	rtg2∆	72	Glycerol	898969.3056638631	622546.2152666742	515121.9504899537
53.666666666666664	0	rtg2∆	144	Glycerol	913597.0927349773	1242662.919165765	567505.3526621045
53.666666666666664	10	rtg2∆	72	Glycerol	908967.3942432174	629283.4295160525	521304.900428008
54	0	rtg2∆	144	Glycerol	924660.4627794826	1258050.528460635	575499.5077830199
54	10	rtg2∆	72	Glycerol	919000.3791825811	636042.1623728486	527522.2876003741
54.333333333333336	0	rtg2∆	144	Glycerol	935724.4533866593	1273443.128323426	583613.0489267432
54.333333333333336	10	rtg2∆	72	Glycerol	929180.6871070572	642898.1184845942	534057.1327528981
54.666666666666664	0	rtg2∆	144	Glycerol	946950.4715242604	1289065.3160691184	592148.935911854
54.666666666666664	10	rtg2∆	72	Glycerol	939573.3783461346	649895.0284486687	540936.9353906531
55	0	rtg2∆	144	Glycerol	958168.5859611522	1304680.6521462433	600969.8677649257
55	10	rtg2∆	72	Glycerol	949891.4546003585	656839.6518370294	548083.8299762786
55.333333333333336	0	rtg2∆	144	Glycerol	969221.9858615191	1320070.7183269833	610114.0763356233
55.333333333333336	10	rtg2∆	72	Glycerol	959933.9258612319	663596.8366722302	555395.9484802643
55.666666666666664	0	rtg2∆	144	Glycerol	979582.6557408257	1334499.8434293438	618751.3683369986
55.666666666666664	10	rtg2∆	72	Glycerol	969312.9807307059	669905.9233924684	562312.1658019377
56	0	rtg2∆	144	Glycerol	989656.444449547	1348532.7145936165	627190.4532732103
56	10	rtg2∆	72	Glycerol	978144.6994693676	675845.3331123746	568773.9386909795
56.333333333333336	0	rtg2∆	144	Glycerol	1000421.9084186871	1363532.6335816039	635937.5385311533
56.333333333333336	10	rtg2∆	72	Glycerol	987639.1673683119	682228.8449400943	575871.1718718014
56.666666666666664	0	rtg2∆	144	Glycerol	1010610.1073412189	1377731.5608955007	643864.6832194779
56.666666666666664	10	rtg2∆	72	Glycerol	996534.4127647624	688207.9829647156	581882.2910701474
57	0	rtg2∆	144	Glycerol	1020903.8665056194	1392080.8623410163	651335.691100015
57	10	rtg2∆	72	Glycerol	1005421.7016889849	694180.3444803469	587356.9375635748
57.333333333333336	0	rtg2∆	144	Glycerol	1032506.5673761384	1408258.6896781723	659770.3826642884
57.333333333333336	10	rtg2∆	72	Glycerol	1015583.6996882375	701007.5923412638	593520.9136777171
57.666666666666664	0	rtg2∆	144	Glycerol	1043993.9713320279	1424279.7715454428	668010.0593751961
57.666666666666664	10	rtg2∆	72	Glycerol	1026077.1881103244	708055.6280042795	599981.1066849913
58	0	rtg2∆	144	Glycerol	1055382.3858849513	1440166.6971834777	675861.1018673482
58	10	rtg2∆	72	Glycerol	1036221.4119912164	714867.2408536525	605394.7819926443
58.333333333333336	0	rtg2∆	144	Glycerol	1067789.6248741485	1457479.2632785738	684351.3298528198
58.333333333333336	10	rtg2∆	72	Glycerol	1047399.0838821977	722370.7215517454	611611.8713871175
58.666666666666664	0	rtg2∆	144	Glycerol	1079509.8405157991	1473837.3270359738	691774.3995289374
58.666666666666664	10	rtg2∆	72	Glycerol	1058158.2584563817	729591.2411825086	617338.186488582
59	0	rtg2∆	144	Glycerol	1091168.2620958677	1490113.0937264669	699351.1409116943
59	10	rtg2∆	72	Glycerol	1068571.643609146	736577.826449048	622894.5359728808
59.333333333333336	0	rtg2∆	144	Glycerol	1103015.1716859457	1506655.9924401692	706725.0392328654
59.333333333333336	10	rtg2∆	72	Glycerol	1079176.5233910235	743691.0148222406	628203.9719499833
59.666666666666664	0	rtg2∆	144	Glycerol	1114780.7640219098	1523089.2826575586	714374.5800454319
59.666666666666664	10	rtg2∆	72	Glycerol	1089705.7645391647	750751.6155220219	633692.1291455963
60	0	rtg2∆	144	Glycerol	1126155.6288477862	1538980.530957079	721789.5720673177
60	10	rtg2∆	72	Glycerol	1099891.0865437055	757579.85422269	639082.0654741513
60.333333333333336	0	rtg2∆	144	Glycerol	1138463.4692841694	1556179.2439899247	730491.082028689
60.333333333333336	10	rtg2∆	72	Glycerol	1110713.192880126	764833.1366489129	645379.4601679783
60.666666666666664	0	rtg2∆	144	Glycerol	1150287.8720248726	1572706.3376434608	738505.666223174
60.666666666666664	10	rtg2∆	72	Glycerol	1121425.3016600935	772010.8303763776	651578.6831791204
61	0	rtg2∆	144	Glycerol	1162148.350133703	1589287.679898268	746700.3397188095
61	10	rtg2∆	72	Glycerol	1131912.305795255	779035.9117472443	657655.4317160595
61.333333333333336	0	rtg2∆	144	Glycerol	1173791.3849045227	1605568.718999259	754571.1527262682
61.333333333333336	10	rtg2∆	72	Glycerol	1142285.110572293	785982.7768046049	663515.2675703305
61.666666666666664	0	rtg2∆	144	Glycerol	1185185.6717593216	1621505.4265185618	762566.0029738947
61.666666666666664	10	rtg2∆	72	Glycerol	1152315.861182444	792698.9536344663	669130.2052264622
62	0	rtg2∆	144	Glycerol	1195715.937621532	1636236.7187602925	769716.5549139172
62	10	rtg2∆	72	Glycerol	1161878.2818041015	799100.0970587103	674312.6549167044
62.333333333333336	0	rtg2∆	144	Glycerol	1206179.0034478765	1650876.88198093	777320.5370195569
62.333333333333336	10	rtg2∆	72	Glycerol	1171024.6781060968	805221.4300130394	679568.4047132629
62.666666666666664	0	rtg2∆	144	Glycerol	1216452.484525895	1665254.543781836	785424.8346918791
62.666666666666664	10	rtg2∆	72	Glycerol	1180077.3386069825	811278.7674552512	685346.2529283637
63	0	rtg2∆	144	Glycerol	1226518.812754015	1679344.9368663323	793441.7319811183
63	10	rtg2∆	72	Glycerol	1188965.8075339308	817225.0289548199	691318.1879740501
63.333333333333336	0	rtg2∆	144	Glycerol	1236755.1360401225	1693675.9394754404	801551.522064965
63.333333333333336	10	rtg2∆	72	Glycerol	1198007.1890742506	823272.3646605436	697373.0506783203
63.666666666666664	0	rtg2∆	144	Glycerol	1247478.7046470498	1708691.943939536	810112.2703982043
63.666666666666664	10	rtg2∆	72	Glycerol	1207214.5454242749	829429.4558104256	703308.3433164766
64	0	rtg2∆	144	Glycerol	1258079.3427505475	1723538.6551395133	818292.0765701843
64	10	rtg2∆	72	Glycerol	1216357.5637564806	835542.2778357418	708935.8570957893
64.33333333333333	0	rtg2∆	144	Glycerol	1268735.4872933563	1738465.9319889848	826480.9171395951
64.33333333333333	10	rtg2∆	72	Glycerol	1225570.1647070986	841700.375805171	714656.4414912973
64.66666666666667	0	rtg2∆	144	Glycerol	1279665.601326527	1753779.908573775	835415.753156935
64.66666666666667	10	rtg2∆	72	Glycerol	1234713.0267163443	847810.6307303747	720674.322951131
65	0	rtg2∆	144	Glycerol	1289987.5768423583	1768244.52600642	843696.6061396155
65	10	rtg2∆	72	Glycerol	1243545.8512630342	853712.5332117784	726727.5406463223
65.33333333333333	0	rtg2∆	144	Glycerol	1299961.46286187	1782223.8158273883	852047.2370948242
65.33333333333333	10	rtg2∆	72	Glycerol	1252096.0854119838	859424.5446819533	732833.7432608579
65.66666666666667	0	rtg2∆	144	Glycerol	1310074.6864786833	1796400.854382227	860569.7213614758
65.66666666666667	10	rtg2∆	72	Glycerol	1260678.1246176413	865156.7524387634	738997.9152433451
66	0	rtg2∆	144	Glycerol	1319579.6107363068	1809727.3961268999	868257.5607824238
66	10	rtg2∆	72	Glycerol	1268557.9414563049	870419.0031903099	744234.8212916113
66.33333333333333	0	rtg2∆	144	Glycerol	1330079.496918479	1824451.4419326903	876334.5574148744
66.33333333333333	10	rtg2∆	72	Glycerol	1277488.736108293	876382.0527001137	749950.1125836379
66.66666666666667	0	rtg2∆	144	Glycerol	1340638.0720585715	1839260.4148416875	884366.4028975687
66.66666666666667	10	rtg2∆	72	Glycerol	1286216.7388152124	882208.6194814267	755214.3699299856
67	0	rtg2∆	144	Glycerol	1351641.8233287812	1854696.553065273	892621.9051331545
67	10	rtg2∆	72	Glycerol	1295321.3379351846	888285.4622679941	760952.9304188929
67.33333333333333	0	rtg2∆	144	Glycerol	1362380.3865605819	1869763.3996861586	900493.9323280752
67.33333333333333	10	rtg2∆	72	Glycerol	1304495.75883724	894407.7495489046	766777.9597485375
67.66666666666667	0	rtg2∆	144	Glycerol	1373963.1539295546	1886017.6987853372	909380.0783596471
67.66666666666667	10	rtg2∆	72	Glycerol	1314453.2571614832	901051.2955270625	773567.7451751402
68	0	rtg2∆	144	Glycerol	1383906.1376177182	1899973.3118844284	917055.6121272693
68	10	rtg2∆	72	Glycerol	1322866.8238438347	906663.6936359975	779102.7619005498
68.33333333333333	0	rtg2∆	144	Glycerol	1393833.1152880802	1913908.7015923357	924622.7670067193
68.33333333333333	10	rtg2∆	72	Glycerol	1331211.6374504406	912229.2839938294	784414.2623457229
68.66666666666667	0	rtg2∆	144	Glycerol	1403206.28539239	1927068.7041287546	931841.8032013953
68.66666666666667	10	rtg2∆	72	Glycerol	1338990.9968812836	917416.9012981846	788998.5653600439
69	0	rtg2∆	144	Glycerol	1412425.2776989336	1940014.161989843	938773.817431024
69	10	rtg2∆	72	Glycerol	1346481.261748434	922410.9743659005	793096.2714208461
69.33333333333333	0	rtg2∆	144	Glycerol	1422012.334889847	1953478.4712285688	946370.7549061243
69.33333333333333	10	rtg2∆	72	Glycerol	1354339.497096558	927649.5885182279	797747.922140975
69.66666666666667	0	rtg2∆	144	Glycerol	1432244.8025161568	1967851.4559115923	954265.0372798576
69.66666666666667	10	rtg2∆	72	Glycerol	1363176.674386543	933539.8316264593	803240.7299417008
70	0	rtg2∆	144	Glycerol	1443524.1005315043	1983697.5320144005	963221.9812705127
70	10	rtg2∆	72	Glycerol	1372908.7364688062	940025.3584377466	809642.8041254305
70.33333333333333	0	rtg2∆	144	Glycerol	1454669.9877965539	1999358.908252569	971723.3086620986
70.33333333333333	10	rtg2∆	72	Glycerol	1382344.4881403733	946312.245062699	815518.5624215706
70.66666666666667	0	rtg2∆	144	Glycerol	1466051.034447372	2015353.488456464	980638.2678774908
70.66666666666667	10	rtg2∆	72	Glycerol	1392039.4987810685	952770.6738466562	821639.4635784326
71	0	rtg2∆	144	Glycerol	1474735.8719484012	2027560.7709364197	986845.9529194072
71	10	rtg2∆	72	Glycerol	1399365.1483335285	957649.9288997339	825643.4809532055
71.33333333333333	0	rtg2∆	144	Glycerol	1481310.7021727506	2036803.3297863754	991711.2115626746
71.33333333333333	10	rtg2∆	72	Glycerol	1404668.0025965855	961181.4721165858	828469.5669271643
71.66666666666667	0	rtg2∆	144	Glycerol	1483077.3045673536	2039286.885644187	992934.7171832934
71.66666666666667	10	rtg2∆	72	Glycerol	1405904.7039915277	962005.0270293634	828917.8912101695
0	0	rtg3∆	144	Glycerol	6696.823425437317	10034.456716692752	3815.806798715155
0	10	rtg3∆	71	Glycerol	8247.44846229264	10034.456716692752	4660.622757900509
0.3333333333333333	0	rtg3∆	144	Glycerol	6702.072268672156	10042.682712916152	3809.1455828301196
0.3333333333333333	10	rtg3∆	71	Glycerol	8245.07343031974	10031.50424065206	4657.233951824129
0.6666666666666666	0	rtg3∆	144	Glycerol	6721.352897783735	10072.901885016217	3805.840648548981
0.6666666666666666	10	rtg3∆	71	Glycerol	8261.467277079222	10051.884317458651	4665.261993665671
1.3333333333333333	0	rtg3∆	144	Glycerol	6775.456355063445	10157.721251888968	3818.864520836218
1.3333333333333333	10	rtg3∆	71	Glycerol	8247.767887363536	10034.853805334153	4669.659138857226
1.6666666666666667	0	rtg3∆	144	Glycerol	6808.620173903163	10209.728402725585	3829.9428262059278
1.6666666666666667	10	rtg3∆	71	Glycerol	8281.19194155076	10076.406279383935	4689.247709325066
2	0	rtg3∆	144	Glycerol	6835.0021300125945	10251.108616256437	3815.105631241917
2	10	rtg3∆	71	Glycerol	8318.584671979239	10122.896897275345	4712.556756105165
2.3333333333333335	0	rtg3∆	144	Glycerol	6863.740347786122	10296.192979772288	3805.1342218368295
2.3333333333333335	10	rtg3∆	71	Glycerol	8362.94746839678	10178.059335674983	4732.9749595395315
2.6666666666666665	0	rtg3∆	144	Glycerol	6889.697878458267	10336.922465968662	3798.573550457343
2.6666666666666665	10	rtg3∆	71	Glycerol	8410.670707607656	10237.407385168692	4755.223441587844
3	0	rtg3∆	144	Glycerol	6917.058104208597	10379.860520928974	3800.7653848233545
3	10	rtg3∆	71	Glycerol	8464.264398067768	10304.06458678113	4782.20368913193
3.3333333333333335	0	rtg3∆	144	Glycerol	6936.979677938041	10411.129557145516	3789.6347573585413
3.3333333333333335	10	rtg3∆	71	Glycerol	8520.431992956355	10373.932935133995	4810.822739950617
3.6666666666666665	0	rtg3∆	144	Glycerol	6967.492470828665	10459.030630907346	3810.4041166025327
3.6666666666666665	10	rtg3∆	71	Glycerol	8582.999553596917	10451.774161259016	4846.410873803901
4	0	rtg3∆	144	Glycerol	7005.074813488777	10518.043200254418	3833.883528458595
4	10	rtg3∆	71	Glycerol	8730.022542716904	10634.736053990766	4931.86778706479
4.333333333333333	0	rtg3∆	144	Glycerol	7055.174139451464	10596.732785292834	3859.45073837443
4.333333333333333	10	rtg3∆	71	Glycerol	8889.651525166548	10833.461261219645	5118.127939404414
4.666666666666667	0	rtg3∆	144	Glycerol	7121.500104408676	10700.948526252792	3897.712303353692
4.666666666666667	10	rtg3∆	71	Glycerol	9061.268292383636	11047.19684718363	5403.620216721254
5	0	rtg3∆	144	Glycerol	7209.896640903159	10839.912217938507	3956.9867851178915
5	10	rtg3∆	71	Glycerol	9248.826848953684	11280.887371236713	5769.223300872111
5.333333333333333	0	rtg3∆	144	Glycerol	7327.009543133217	11024.139778758372	4039.5736199621697
5.333333333333333	10	rtg3∆	71	Glycerol	9457.580084497009	11541.106766111294	6173.27476969211
5.666666666666667	0	rtg3∆	144	Glycerol	7469.11418912543	11247.862663779364	4140.673959957251
5.666666666666667	10	rtg3∆	71	Glycerol	9536.985944528686	11640.122350362053	5905.5863209440695
6	0	rtg3∆	144	Glycerol	7629.62856983814	11500.803906099787	4254.5358177042035
6	10	rtg3∆	71	Glycerol	9709.314554448445	11855.069972210656	5963.086102186754
6.333333333333333	0	rtg3∆	144	Glycerol	7825.550421959045	11809.871584037854	4369.517912584809
6.333333333333333	10	rtg3∆	71	Glycerol	9926.221461853334	12125.738457172318	6062.6367878937535
6.666666666666667	0	rtg3∆	144	Glycerol	8054.122513574502	12170.893818441531	4503.313826719224
6.666666666666667	10	rtg3∆	71	Glycerol	10187.206663128203	12451.580595996838	6211.5993632128375
7	0	rtg3∆	144	Glycerol	8306.475069263939	12570.022714872726	4648.337040869411
7	10	rtg3∆	71	Glycerol	10413.997696409215	12734.878684721773	6165.432103055188
7.333333333333333	0	rtg3∆	144	Glycerol	8601.886873492609	13037.962143434415	4830.807319201782
7.333333333333333	10	rtg3∆	71	Glycerol	10753.129736792966	13158.758117435058	6363.205458981339
7.666666666666667	0	rtg3∆	144	Glycerol	8940.765848214302	13575.66258155325	5049.879037766523
7.666666666666667	10	rtg3∆	71	Glycerol	11067.293232258256	13551.689237163619	6444.172448380277
8	0	rtg3∆	144	Glycerol	9333.681715289315	14200.273844309631	5322.931483558641
8	10	rtg3∆	71	Glycerol	11433.584601917042	14010.123794515373	6646.769405480623
8.333333333333334	0	rtg3∆	144	Glycerol	9777.309776046803	14906.951480475469	5630.2189379733745
8.333333333333334	10	rtg3∆	71	Glycerol	11866.357641933062	14552.175036874873	6958.636603525611
8.666666666666666	0	rtg3∆	144	Glycerol	10287.530492223395	15721.526489514563	5980.1837610881175
8.666666666666666	10	rtg3∆	71	Glycerol	12437.158749116956	15267.76286252763	7363.67246911189
9	0	rtg3∆	144	Glycerol	10847.295927954945	16617.333883625844	6347.699864250976
9	10	rtg3∆	71	Glycerol	13080.41158221889	16075.035321170357	7824.196307234024
9.333333333333334	0	rtg3∆	144	Glycerol	11482.033387190262	17635.68705396669	6783.4986208886785
9.333333333333334	10	rtg3∆	71	Glycerol	13806.054083754409	16986.740805170117	8333.083621043519
9.666666666666666	0	rtg3∆	144	Glycerol	12191.588896720945	18777.134326313193	7286.828182468723
9.666666666666666	10	rtg3∆	71	Glycerol	14636.284700189573	18031.128535880154	8917.730902918114
10	0	rtg3∆	144	Glycerol	12984.0756358963	20055.5956270682	7851.040667720878
10	10	rtg3∆	71	Glycerol	15539.95732600165	19169.366347417203	9547.573038723604
10.333333333333334	0	rtg3∆	144	Glycerol	13872.0827201962	21492.407495488656	8485.454400786539
10.333333333333334	10	rtg3∆	71	Glycerol	16547.344630899897	20439.93521463304	10248.107403597818
10.666666666666666	0	rtg3∆	144	Glycerol	14859.663048307439	23095.28917191742	9167.760144039317
10.666666666666666	10	rtg3∆	71	Glycerol	17659.911459637253	21845.115397153175	11035.482305628248
11	0	rtg3∆	144	Glycerol	15942.265567540535	24858.015718755578	9888.544042532174
11	10	rtg3∆	71	Glycerol	18873.943828540137	23380.642963815746	11894.950539073876
11.333333333333334	0	rtg3∆	144	Glycerol	17108.51091186874	26763.084486643893	10646.794753660248
11.333333333333334	10	rtg3∆	71	Glycerol	20172.17874192863	25025.047947309424	12793.844850362815
11.666666666666666	0	rtg3∆	144	Glycerol	18381.41537276967	28849.18840885918	11453.462076414071
11.666666666666666	10	rtg3∆	71	Glycerol	21628.653244740737	26872.62316493493	13808.875193859025
12	0	rtg3∆	144	Glycerol	19742.70834669808	31087.492888204637	12280.766444244839
12	10	rtg3∆	71	Glycerol	23176.74415333754	28839.38309755783	14883.742736639117
12.333333333333334	0	rtg3∆	144	Glycerol	21216.188010229536	33518.24963710102	13176.731502545406
12.333333333333334	10	rtg3∆	71	Glycerol	24834.809098217367	30949.02733163621	16032.513965128008
12.666666666666666	0	rtg3∆	144	Glycerol	22788.14350097161	36120.01097325336	14095.214310037152
12.666666666666666	10	rtg3∆	71	Glycerol	26589.245755512144	33184.62669089864	17204.540695712618
13	0	rtg3∆	144	Glycerol	24498.375044107546	38959.99677657783	15058.274845700815
13	10	rtg3∆	71	Glycerol	28508.9560652087	35634.500595647085	18479.23117355886
13.333333333333334	0	rtg3∆	144	Glycerol	26314.95267456727	41986.55747124701	16068.899978936133
13.333333333333334	10	rtg3∆	71	Glycerol	30521.55404468446	38206.76897106954	19789.916886221632
13.666666666666666	0	rtg3∆	144	Glycerol	28249.338123740094	45219.94962206327	17118.495779200126
13.666666666666666	10	rtg3∆	71	Glycerol	32680.40940967314	40970.06694530997	21152.0666619232
14	0	rtg3∆	144	Glycerol	30282.012857410187	48628.6010101625	18157.675856029175
14	10	rtg3∆	71	Glycerol	34943.05056108169	43870.471719110414	22541.01434569193
14.333333333333334	0	rtg3∆	144	Glycerol	32456.29193910677	52286.34883501521	19269.092014138518
14.333333333333334	10	rtg3∆	71	Glycerol	37389.19800591744	47010.70081511741	24057.411706085488
14.666666666666666	0	rtg3∆	144	Glycerol	34698.57125208513	56070.29277957115	20370.84301230314
14.666666666666666	10	rtg3∆	71	Glycerol	39929.08917188779	50276.00417451757	25591.580334256163
15	0	rtg3∆	144	Glycerol	37059.7114516084	60066.9662232636	21478.449230437396
15	10	rtg3∆	71	Glycerol	42577.54471780818	53685.692195834614	27153.553728869203
15.333333333333334	0	rtg3∆	144	Glycerol	39550.293080722615	64295.424600784725	22612.096085546887
15.333333333333334	10	rtg3∆	71	Glycerol	45351.33381915444	57261.68499509445	28766.566547530227
15.666666666666666	0	rtg3∆	144	Glycerol	42162.7007043789	68743.86647436702	23759.067830244083
15.666666666666666	10	rtg3∆	71	Glycerol	48252.83480725942	61007.41736279147	30415.292163798902
16	0	rtg3∆	144	Glycerol	44868.05702272012	73363.93664596495	24885.522867362004
16	10	rtg3∆	71	Glycerol	51224.814124377626	64849.21716652402	32041.958841290085
16.333333333333332	0	rtg3∆	144	Glycerol	47673.27881844268	78168.07391311818	25993.843720078767
16.333333333333332	10	rtg3∆	71	Glycerol	54259.36583471148	68776.90847268884	33657.86395777315
16.666666666666668	0	rtg3∆	144	Glycerol	50574.92500045141	83151.01570784839	27103.84558188388
16.666666666666668	10	rtg3∆	71	Glycerol	57413.05901918332	72863.87193061895	35306.19234293399
17	0	rtg3∆	144	Glycerol	53544.00336216375	88263.36166977853	28183.032446902325
17	10	rtg3∆	71	Glycerol	60599.89784871236	76998.7540422709	36904.882630556545
17.333333333333332	0	rtg3∆	144	Glycerol	56654.18909238328	93632.64426085926	29329.864887227344
17.333333333333332	10	rtg3∆	71	Glycerol	63895.195813317325	81279.33605906805	38529.39114422405
17.666666666666668	0	rtg3∆	144	Glycerol	59871.06016244821	99200.35526924259	30463.589016385213
17.666666666666668	10	rtg3∆	71	Glycerol	67252.94026732378	85645.97792804055	40150.720335724465
18	0	rtg3∆	144	Glycerol	63175.21363234415	104933.44769270622	31604.639595191795
18	10	rtg3∆	71	Glycerol	70700.28602906628	90134.07907888875	41784.781010492305
18.333333333333332	0	rtg3∆	144	Glycerol	66568.54485636266	110835.61798137309	32706.32877582434
18.333333333333332	10	rtg3∆	71	Glycerol	74182.30254448415	94672.15329429023	43380.11753929934
18.666666666666668	0	rtg3∆	144	Glycerol	70130.24669712382	117045.51064122436	33940.64753640868
18.666666666666668	10	rtg3∆	71	Glycerol	77789.90699564407	99378.79286249864	45089.188066329516
19	0	rtg3∆	144	Glycerol	73791.60899786637	123444.27122438439	35150.785094390245
19	10	rtg3∆	71	Glycerol	81481.65221889236	104200.12327770267	46796.13560963051
19.333333333333332	0	rtg3∆	144	Glycerol	77553.8318351644	130034.49921093967	36407.03739776105
19.333333333333332	10	rtg3∆	71	Glycerol	85265.51969080362	109146.69558380761	48540.034410892775
19.666666666666668	0	rtg3∆	144	Glycerol	81436.81362013092	136851.6642195878	37674.30464283592
19.666666666666668	10	rtg3∆	71	Glycerol	89132.61649667357	114207.00717172025	50305.02948053131
20	0	rtg3∆	144	Glycerol	85453.02259615817	143918.44280147564	39020.78097549461
20	10	rtg3∆	71	Glycerol	93081.19541864342	119378.8718448383	52104.61456810775
20.333333333333332	0	rtg3∆	144	Glycerol	89523.72450914927	151096.68261827278	40320.88016424705
20.333333333333332	10	rtg3∆	71	Glycerol	97086.72477534774	124630.20841310473	53878.97869699006
20.666666666666668	0	rtg3∆	144	Glycerol	93643.2197017474	158376.23626363295	41669.26379953762
20.666666666666668	10	rtg3∆	71	Glycerol	101124.888728088	129929.10230414252	55665.5357112448
21	0	rtg3∆	144	Glycerol	97867.681799203	165856.5586994258	43050.88343466835
21	10	rtg3∆	71	Glycerol	105234.03342634952	135325.8636211491	57480.7509606103
21.333333333333332	0	rtg3∆	144	Glycerol	102174.70600307621	173498.35034635698	44515.79009797892
21.333333333333332	10	rtg3∆	71	Glycerol	109384.33783668146	140781.3369551935	59328.928859876694
21.666666666666668	0	rtg3∆	144	Glycerol	106577.40288460451	181325.1887413939	46027.893261556535
21.666666666666668	10	rtg3∆	71	Glycerol	113624.96426575375	146360.18799851844	61229.75167954191
22	0	rtg3∆	144	Glycerol	111039.73861220772	189273.21035133203	47559.1787763086
22	10	rtg3∆	71	Glycerol	117899.91593133476	151988.7822333351	63132.39198258066
22.333333333333332	0	rtg3∆	144	Glycerol	115620.00739644763	197446.5482459317	49141.44621721056
22.333333333333332	10	rtg3∆	71	Glycerol	122253.39201743653	157725.3287421695	65101.71988497147
22.666666666666668	0	rtg3∆	144	Glycerol	120257.7401122187	205737.58805768375	50796.61916671578
22.666666666666668	10	rtg3∆	71	Glycerol	126658.60559787658	163534.57379215304	67118.14047524826
23	0	rtg3∆	144	Glycerol	124978.95302315915	214192.95850682596	52520.12908190904
23	10	rtg3∆	71	Glycerol	131097.20191011982	169392.28782391347	69145.12225528777
23.333333333333332	0	rtg3∆	144	Glycerol	129785.96242330682	222817.06248510833	54283.579592443515
23.333333333333332	10	rtg3∆	71	Glycerol	135633.4298038829	175383.30650587718	71228.81766941774
23.666666666666668	0	rtg3∆	144	Glycerol	134666.01496314927	231587.22305204306	56074.58579514322
23.666666666666668	10	rtg3∆	71	Glycerol	140223.37533832464	181449.7076388392	73339.53268713776
24	0	rtg3∆	144	Glycerol	139639.5913749503	240540.48323071233	57909.79072222846
24	10	rtg3∆	71	Glycerol	144904.29504582493	187640.79610414244	75465.16276980184
24.333333333333332	0	rtg3∆	144	Glycerol	144756.93141657463	249767.8318168769	59849.31824708261
24.333333333333332	10	rtg3∆	71	Glycerol	149738.53618802907	194039.23736138077	77671.27089894554
24.666666666666668	0	rtg3∆	144	Glycerol	149986.2263220988	259212.5331407874	61864.495297166024
24.666666666666668	10	rtg3∆	71	Glycerol	154621.05898925383	200506.14467764046	79944.91949532507
25	0	rtg3∆	144	Glycerol	155229.2680272258	268697.2531103199	63952.83002046258
25	10	rtg3∆	71	Glycerol	159486.53609667247	206954.89534439595	82245.66877905266
25.333333333333332	0	rtg3∆	144	Glycerol	160486.4286389268	278222.29343523097	66076.20038270048
25.333333333333332	10	rtg3∆	71	Glycerol	164373.17344219226	213436.00051023177	84562.90990876005
25.666666666666668	0	rtg3∆	144	Glycerol	165790.07230282345	287846.0785193852	68262.72483419238
25.666666666666668	10	rtg3∆	71	Glycerol	169291.24033801528	219963.02308675344	86948.7940159487
26	0	rtg3∆	144	Glycerol	171149.76552078963	297585.9376508581	70479.08091977984
26	10	rtg3∆	71	Glycerol	174209.37921092566	226494.26702804392	89330.65070417519
26.333333333333332	0	rtg3∆	144	Glycerol	176531.44054435866	307379.8425487147	72763.35265564945
26.333333333333332	10	rtg3∆	71	Glycerol	179257.76041981945	233202.64324087987	91804.02320562126
26.666666666666668	0	rtg3∆	144	Glycerol	182002.7973116672	317351.01595773053	75109.23808920915
26.666666666666668	10	rtg3∆	71	Glycerol	184356.06301361235	239981.52731377567	94339.77462120882
27	0	rtg3∆	144	Glycerol	187626.36521329742	327613.93155615946	77637.72452137586
27	10	rtg3∆	71	Glycerol	189580.7170952638	246932.64365009827	96989.899067493
27.333333333333332	0	rtg3∆	144	Glycerol	193259.18111828444	337907.89139071165	80194.6834418621
27.333333333333332	10	rtg3∆	71	Glycerol	194799.32790449564	253879.88060495845	99624.82769719206
27.666666666666668	0	rtg3∆	144	Glycerol	198804.9999241829	348056.3323996814	82801.09681740752
27.666666666666668	10	rtg3∆	71	Glycerol	199986.06304587642	260788.69587167326	102304.91627408906
28	0	rtg3∆	144	Glycerol	204420.07225336728	358344.7509482218	85472.5619256131
28	10	rtg3∆	71	Glycerol	205201.6899454372	267739.9263913999	105022.91693735699
28.333333333333332	0	rtg3∆	144	Glycerol	210034.96618139523	368645.8246685051	88207.67638502206
28.333333333333332	10	rtg3∆	71	Glycerol	210372.826619062	274635.6569008887	107722.43029619264
28.666666666666668	0	rtg3∆	144	Glycerol	215790.84831274257	379218.68321893853	91064.1620151559
28.666666666666668	10	rtg3∆	71	Glycerol	215729.58708753544	281782.8050773292	110630.33927267251
29	0	rtg3∆	144	Glycerol	221699.52970196318	390085.6881421123	94128.06670937882
29	10	rtg3∆	71	Glycerol	221250.2151796438	289152.6294259597	113742.6055897238
29.333333333333332	0	rtg3∆	144	Glycerol	227936.07907343245	401570.12041722244	97507.26580965333
29.333333333333332	10	rtg3∆	71	Glycerol	227053.39033852654	296903.9546344626	117112.79544674917
30	0	rtg3∆	144	Glycerol	237522.8393831163	419251.8937044626	101407.39007493327
30	10	rtg3∆	71	Glycerol	236105.01685152494	309002.81531382474	121414.97216967527
30.333333333333332	0	rtg3∆	144	Glycerol	244607.9856668061	432340.84993352625	105518.9589276995
30.333333333333332	10	rtg3∆	71	Glycerol	242842.86654673572	318015.5395434931	125510.16290335316
30.666666666666668	0	rtg3∆	144	Glycerol	251496.4239485911	445083.1149127815	109423.98486764649
30.666666666666668	10	rtg3∆	71	Glycerol	249383.99986860366	326770.33707161294	129359.00222112711
31	0	rtg3∆	144	Glycerol	258359.19699233296	457793.8483526349	113403.29150228757
31	10	rtg3∆	71	Glycerol	255940.39226668395	335550.5712138814	133201.55848000108
31.333333333333332	0	rtg3∆	144	Glycerol	265035.9056145799	470174.85518066183	117455.5617808552
31.333333333333332	10	rtg3∆	71	Glycerol	262277.6355887238	344041.9760894455	137031.04912135543
31.666666666666668	0	rtg3∆	144	Glycerol	271481.7646386571	482141.3808320051	120990.57337508442
31.666666666666668	10	rtg3∆	71	Glycerol	268412.1962717604	352266.05525381025	140444.8639699287
32	0	rtg3∆	144	Glycerol	278188.2609565131	494605.62003854447	124714.4573660166
32	10	rtg3∆	71	Glycerol	274951.6323582497	361037.4169351592	144082.55567840405
32.333333333333336	0	rtg3∆	144	Glycerol	285058.1185767754	507387.7798396197	128615.24633525152
32.333333333333336	10	rtg3∆	71	Glycerol	281677.27549177577	370063.27197675715	147895.3271327747
32.666666666666664	0	rtg3∆	144	Glycerol	292053.51363044436	520418.05466719973	132642.21033888368
32.666666666666664	10	rtg3∆	71	Glycerol	288540.9071148469	379279.14167061675	151868.9817703732
33	0	rtg3∆	144	Glycerol	299546.53644941706	534391.1512371763	136711.43514950527
33	10	rtg3∆	71	Glycerol	295888.8612756846	389150.599544748	155894.27950592723
33.333333333333336	0	rtg3∆	144	Glycerol	307009.52634394803	548324.2020054071	141039.24687699997
33.333333333333336	10	rtg3∆	71	Glycerol	303211.0965778153	398992.8116079431	160165.57360682118
33.666666666666664	0	rtg3∆	144	Glycerol	314203.5337153579	561769.8059063114	145215.1834685659
33.666666666666664	10	rtg3∆	71	Glycerol	310206.8277381421	408400.9837951124	164219.06465641546
34	0	rtg3∆	144	Glycerol	321682.1867195128	575762.399100461	149605.1829447184
34	10	rtg3∆	71	Glycerol	317418.6855646775	418104.64375576074	168371.21789221614
34.333333333333336	0	rtg3∆	144	Glycerol	329340.0294127475	590105.7380334599	154015.39876265023
34.333333333333336	10	rtg3∆	71	Glycerol	324804.035169667	428046.7095316912	172547.0699790597
34.666666666666664	0	rtg3∆	144	Glycerol	336975.7209959864	604422.8405645636	158547.30617614204
34.666666666666664	10	rtg3∆	71	Glycerol	332245.1085288208	438068.763599694	176933.66302643827
35	0	rtg3∆	144	Glycerol	345003.88494111074	619491.9020243299	163299.86386207736
35	10	rtg3∆	71	Glycerol	339970.3785119552	448478.7546929883	181463.27671425493
35.333333333333336	0	rtg3∆	144	Glycerol	353253.3896912185	634993.2011107521	168143.55302042322
35.333333333333336	10	rtg3∆	71	Glycerol	347939.6273502138	459222.9047307337	186098.52762037126
35.666666666666664	0	rtg3∆	144	Glycerol	361626.1996430956	650743.1985347894	173167.2348790322
35.666666666666664	10	rtg3∆	71	Glycerol	356052.1613797883	470165.7303381836	190955.68210828016
36	0	rtg3∆	144	Glycerol	369749.5852364672	666040.0191529813	177922.83308470692
36	10	rtg3∆	71	Glycerol	363882.09608266805	480732.5092090973	195533.06541584685
36.333333333333336	0	rtg3∆	144	Glycerol	378388.2669505144	682324.1017477285	182911.223199042
36.333333333333336	10	rtg3∆	71	Glycerol	372167.42925107724	491919.24903163227	200390.0929783951
36.666666666666664	0	rtg3∆	144	Glycerol	387177.6867930308	698909.8522986447	188149.90855458766
36.666666666666664	10	rtg3∆	71	Glycerol	380561.66823721974	503258.55681134964	205371.90803321978
37	0	rtg3∆	144	Glycerol	396011.7363634466	715597.2453890762	193400.97123782366
37	10	rtg3∆	71	Glycerol	388963.45207243046	514613.50522675243	210363.48895445798
37.333333333333336	0	rtg3∆	144	Glycerol	404916.0620743166	732434.6910554948	198521.515983711
37.333333333333336	10	rtg3∆	71	Glycerol	397397.9163154746	526017.9879700008	215248.86476485277
37.666666666666664	0	rtg3∆	144	Glycerol	414274.86438928574	750149.8441029713	204176.48441607648
37.666666666666664	10	rtg3∆	71	Glycerol	406357.0971048135	538137.7201103644	220630.8189215559
38	0	rtg3∆	144	Glycerol	423481.75908417354	767595.3922261081	209718.35672650405
38	10	rtg3∆	71	Glycerol	415051.56601658365	549904.9167003864	225918.3760227324
38.333333333333336	0	rtg3∆	144	Glycerol	432574.0307148177	784840.8468717576	215176.05432418655
38.333333333333336	10	rtg3∆	71	Glycerol	423690.2361955721	561601.905935818	231182.62128237484
38.666666666666664	0	rtg3∆	144	Glycerol	442079.94993656845	802888.6702562746	220997.91144667508
38.666666666666664	10	rtg3∆	71	Glycerol	432660.3616648465	573753.1838349355	236790.1049548638
39	0	rtg3∆	144	Glycerol	451390.16971377045	820582.2214577167	226705.01731096077
39	10	rtg3∆	71	Glycerol	441465.70786428754	585686.5765954606	242364.1833054675
39.333333333333336	0	rtg3∆	144	Glycerol	460733.10617875744	838354.7985388882	232310.73407123727
39.333333333333336	10	rtg3∆	71	Glycerol	450125.79526015103	597428.1593926083	247741.300341961
39.666666666666664	0	rtg3∆	144	Glycerol	470740.96875999845	857410.5830957788	238765.9438476753
39.666666666666664	10	rtg3∆	71	Glycerol	459478.8647457174	610114.8233837727	253875.70332100568
40	0	rtg3∆	144	Glycerol	481603.1371135942	878114.0811440434	246031.71871115305
40	10	rtg3∆	71	Glycerol	469683.02122278966	623962.3207804314	260920.737641801
40.666666666666664	0	rtg3∆	144	Glycerol	496454.6709160294	906456.005501083	253809.6486409096
40.666666666666664	10	rtg3∆	71	Glycerol	483577.8824903909	642828.7672771502	268787.62021619536
41	0	rtg3∆	144	Glycerol	507731.98441469757	928003.144609778	261725.34623877122
41	10	rtg3∆	71	Glycerol	494090.3332871457	657110.4312803199	276218.7629704609
41.333333333333336	0	rtg3∆	144	Glycerol	518768.41269006947	949111.319561182	269216.74245655484
41.333333333333336	10	rtg3∆	71	Glycerol	504363.3555845041	671073.2077407094	283391.088418561
41.666666666666664	0	rtg3∆	144	Glycerol	529481.2236971252	969620.2781167037	276330.6750322065
41.666666666666664	10	rtg3∆	71	Glycerol	514179.61651288747	684420.9503817641	290035.87882073876
42	0	rtg3∆	144	Glycerol	539588.4666458569	988987.3962594102	282867.9772221578
42	10	rtg3∆	71	Glycerol	523382.73049575917	696939.9982333786	296063.4852126713
42.333333333333336	0	rtg3∆	144	Glycerol	550170.3609918514	1009281.8716654528	289723.2687533827
42.333333333333336	10	rtg3∆	71	Glycerol	533012.1210681843	710044.0377839494	302500.16283451254
42.666666666666664	0	rtg3∆	144	Glycerol	559852.0586761719	1027865.6186049844	295732.4996939355
42.666666666666664	10	rtg3∆	71	Glycerol	541856.1553507135	722083.8739761768	308235.27377972327
43	0	rtg3∆	144	Glycerol	570596.4650368223	1048506.4727970299	302991.3459823562
43	10	rtg3∆	71	Glycerol	551775.3626268881	735592.4807870956	315015.37969435693
43.333333333333336	0	rtg3∆	144	Glycerol	581950.913919856	1070338.6599037023	310989.96081708197
43.333333333333336	10	rtg3∆	71	Glycerol	562440.861316087	750123.3260299148	322585.5798534925
44	0	rtg3∆	144	Glycerol	598852.8645754464	1102873.6396660176	321045.41001434816
44	10	rtg3∆	71	Glycerol	578295.2961543793	771734.7058949124	332343.2254505469
44.333333333333336	0	rtg3∆	144	Glycerol	610993.0248632547	1126268.6296023778	330000.78484206815
44.333333333333336	10	rtg3∆	71	Glycerol	589760.6309586337	787371.3000018317	340808.74276171916
44.666666666666664	0	rtg3∆	144	Glycerol	622914.2310046755	1149262.4566608057	338668.1957146813
44.666666666666664	10	rtg3∆	71	Glycerol	600735.3976588707	802345.0463779479	348692.2711863744
45	0	rtg3∆	144	Glycerol	633647.5225787469	1169982.314035629	346083.1921480203
45	10	rtg3∆	71	Glycerol	610707.0610689827	815955.3418897799	355633.73288190615
45.333333333333336	0	rtg3∆	144	Glycerol	644022.2756114822	1190025.3605423803	353021.20906516263
45.333333333333336	10	rtg3∆	71	Glycerol	620184.5875786509	828895.6733461634	362045.1146432357
45.666666666666664	0	rtg3∆	144	Glycerol	654114.2228288439	1209536.2817935182	359635.3592164771
45.666666666666664	10	rtg3∆	71	Glycerol	629489.3367747563	841604.2849677921	368319.5564311091
46	0	rtg3∆	144	Glycerol	664413.9805894467	1229463.2186973472	366421.61093234265
46	10	rtg3∆	71	Glycerol	639052.2097238469	854669.704491046	374655.5763423612
46.333333333333336	0	rtg3∆	144	Glycerol	674895.8446540965	1249757.039661382	373281.2757263352
46.333333333333336	10	rtg3∆	71	Glycerol	649138.5164410457	868454.8806072137	381430.73291763844
46.666666666666664	0	rtg3∆	144	Glycerol	685932.638151342	1271140.8931900498	380581.4160105808
46.666666666666664	10	rtg3∆	71	Glycerol	659508.7257134166	882632.9298187802	388429.8638545067
47	0	rtg3∆	144	Glycerol	696752.9557633013	1292120.6640039564	387627.21441168105
47	10	rtg3∆	71	Glycerol	669871.79917929	896806.0676344761	395314.0453872966
47.333333333333336	0	rtg3∆	144	Glycerol	707670.5480996993	1313304.2068062674	394443.7838172952
47.333333333333336	10	rtg3∆	71	Glycerol	680173.2967210184	910899.7179888722	401923.9744930194
47.666666666666664	0	rtg3∆	144	Glycerol	718957.5853848932	1335220.364055951	401359.096810686
47.666666666666664	10	rtg3∆	71	Glycerol	690595.5705790569	925163.3293919906	408525.64834181534
48	0	rtg3∆	144	Glycerol	730292.1359995977	1357244.6785260823	408273.924867645
48	10	rtg3∆	71	Glycerol	700890.2945146956	939256.9770511613	414930.2469075708
48.333333333333336	0	rtg3∆	144	Glycerol	741578.0869053563	1379190.1555484359	415027.97245167027
48.333333333333336	10	rtg3∆	71	Glycerol	711266.4553205812	953466.6695484914	421282.868975159
48.666666666666664	0	rtg3∆	144	Glycerol	752520.1257793381	1400481.542860812	421440.7569814456
48.666666666666664	10	rtg3∆	71	Glycerol	721159.9892629631	967019.6263728617	427265.87545423984
49	0	rtg3∆	144	Glycerol	764032.3646782329	1422897.7882158174	428354.8878622973
49	10	rtg3∆	71	Glycerol	731623.3484592289	981357.5750389899	433921.0530587823
49.333333333333336	0	rtg3∆	144	Glycerol	775505.0470335421	1445252.4415707153	435283.7984133648
49.333333333333336	10	rtg3∆	71	Glycerol	742125.014312534	995752.5002881836	440434.7745391106
49.666666666666664	0	rtg3∆	144	Glycerol	786837.0853296194	1467347.9579356625	442031.5298076237
49.666666666666664	10	rtg3∆	71	Glycerol	752466.1046174688	1009931.6503653667	446935.21228820283
50	0	rtg3∆	144	Glycerol	798734.3882119112	1490561.363652484	449261.9530300959
50	10	rtg3∆	71	Glycerol	763386.4280781717	1024909.6143667906	453776.0923419884
50.333333333333336	0	rtg3∆	144	Glycerol	811175.3837102639	1514852.5741671382	456914.97968669457
50.333333333333336	10	rtg3∆	71	Glycerol	774660.265967188	1040377.3361563353	460951.08363065583
50.666666666666664	0	rtg3∆	144	Glycerol	823137.4028716519	1538224.7132648774	464361.3827474299
50.666666666666664	10	rtg3∆	71	Glycerol	785604.621461568	1055397.6923738515	467809.05598484585
51	0	rtg3∆	144	Glycerol	834660.7432117291	1560754.486509915	471485.7868600383
51	10	rtg3∆	71	Glycerol	796153.1501166867	1069879.1126377136	474647.9546931698
51.333333333333336	0	rtg3∆	144	Glycerol	846281.8242763483	1583489.8219466438	478776.5958622591
51.333333333333336	10	rtg3∆	71	Glycerol	806760.7906882198	1084445.8926382973	481522.9312222965
51.666666666666664	0	rtg3∆	144	Glycerol	857792.8106857849	1606023.9034712075	486172.7034364223
51.666666666666664	10	rtg3∆	71	Glycerol	817145.3461702861	1098710.3605317548	488400.3984136446
52	0	rtg3∆	144	Glycerol	869074.0806196748	1628121.7626411982	493593.0214662772
52	10	rtg3∆	71	Glycerol	827384.1106153812	1112778.4271999872	495217.34745781904
52.333333333333336	0	rtg3∆	144	Glycerol	880392.001110688	1650304.6492724256	501132.84297373553
52.333333333333336	10	rtg3∆	71	Glycerol	837410.6586366629	1126558.578615988	501999.5364702468
52.666666666666664	0	rtg3∆	144	Glycerol	892166.3016497699	1673395.9266231365	509115.5519681935
52.666666666666664	10	rtg3∆	71	Glycerol	847798.7540392474	1140839.413474914	509006.13465030375
53	0	rtg3∆	144	Glycerol	903412.6089381457	1695464.7942588136	516707.7512627749
53	10	rtg3∆	71	Glycerol	857645.1191777205	1154379.029446922	515755.33814955107
53.333333333333336	0	rtg3∆	144	Glycerol	914170.8573640025	1716587.7415507587	523847.33349293156
53.333333333333336	10	rtg3∆	71	Glycerol	867038.9560696426	1167299.531574663	522411.72168482625
53.666666666666664	0	rtg3∆	144	Glycerol	925509.5884240468	1738862.7717019427	531478.0339812984
53.666666666666664	10	rtg3∆	71	Glycerol	876970.2770648756	1180962.612412187	529469.4790413611
54	0	rtg3∆	144	Glycerol	936658.6760680397	1760777.4651195537	538913.1407973518
54	10	rtg3∆	71	Glycerol	886990.4547015938	1194751.349164896	536565.5833765751
54.333333333333336	0	rtg3∆	144	Glycerol	947928.9503898976	1782942.5369167028	546826.0358256804
54.333333333333336	10	rtg3∆	71	Glycerol	897100.8114944188	1208667.6151870615	543959.6026085976
54.666666666666664	0	rtg3∆	144	Glycerol	959691.4390299292	1806088.5418052468	555278.97468824
54.666666666666664	10	rtg3∆	71	Glycerol	907589.535257037	1223108.2842498955	551786.8244989058
55	0	rtg3∆	144	Glycerol	971409.5864003449	1829160.2460452456	564045.6002343036
55	10	rtg3∆	71	Glycerol	917965.3389037538	1237397.058914796	559516.7599368842
55.333333333333336	0	rtg3∆	144	Glycerol	982807.9072765955	1851614.510767399	572920.7014659522
55.333333333333336	10	rtg3∆	71	Glycerol	928067.0895901759	1251311.8039102354	567669.4466460709
55.666666666666664	0	rtg3∆	144	Glycerol	993583.330382108	1872852.6879204877	581294.8315567231
55.666666666666664	10	rtg3∆	71	Glycerol	937292.1833833803	1264021.8690708445	575043.358010753
56	0	rtg3∆	144	Glycerol	1003799.409836049	1892998.1766415301	589058.3442077673
56	10	rtg3∆	71	Glycerol	946174.283433035	1276261.9388815793	582146.7917398924
56.333333333333336	0	rtg3∆	144	Glycerol	1014635.4811893657	1914376.538205225	597322.7536123877
56.333333333333336	10	rtg3∆	71	Glycerol	955779.2373931549	1289500.956919725	589603.9953438588
56.666666666666664	0	rtg3∆	144	Glycerol	1024960.6008613907	1934756.6042608873	604993.8572587611
56.666666666666664	10	rtg3∆	71	Glycerol	964971.8383872028	1302174.3175259682	596759.0030829057
57	0	rtg3∆	144	Glycerol	1035552.9652634609	1955673.9618747605	612454.1089771416
57	10	rtg3∆	71	Glycerol	974400.1067985106	1315175.308181649	603539.4431372776
57.333333333333336	0	rtg3∆	144	Glycerol	1047607.0036541659	1979489.7178643811	620798.1345971036
57.333333333333336	10	rtg3∆	71	Glycerol	985392.1226989989	1330336.0613344603	611544.3347628328
57.666666666666664	0	rtg3∆	144	Glycerol	1059748.3659849395	2003490.7236275738	628894.5181497615
57.666666666666664	10	rtg3∆	71	Glycerol	996310.0482119485	1345398.266782784	619389.1362429389
58	0	rtg3∆	144	Glycerol	1071614.2521259158	2026959.3697228937	636337.6433658077
58	10	rtg3∆	71	Glycerol	1006765.7568529902	1359826.1707838925	626513.4636537995
58.333333333333336	0	rtg3∆	144	Glycerol	1084487.328873773	2052433.5531117653	644153.6272227375
58.333333333333336	10	rtg3∆	71	Glycerol	1018138.8313879191	1375523.6538904773	633990.3400671085
58.666666666666664	0	rtg3∆	144	Glycerol	1096701.3044492493	2076616.2982244592	651113.9430716031
58.666666666666664	10	rtg3∆	71	Glycerol	1029045.2768332014	1390580.6636401522	640657.0992013296
59	0	rtg3∆	144	Glycerol	1108760.4678069127	2100504.6599064535	658394.9902736986
59	10	rtg3∆	71	Glycerol	1039609.3849172716	1405168.3656933564	647429.13527336
59.333333333333336	0	rtg3∆	144	Glycerol	1121082.5555880754	2124926.17856648	665806.3968093581
59.333333333333336	10	rtg3∆	71	Glycerol	1050513.6022369969	1420229.0970610431	654360.3369187292
59.666666666666664	0	rtg3∆	144	Glycerol	1133441.2223303725	2149432.5741798123	673411.6919041389
59.666666666666664	10	rtg3∆	71	Glycerol	1061630.230296544	1435586.7069009608	661638.0723791219
60	0	rtg3∆	144	Glycerol	1145392.3788554766	2173142.5753527195	680699.6532031158
60	10	rtg3∆	71	Glycerol	1072239.0708642297	1450246.0712764813	668626.4210048273
60.333333333333336	0	rtg3∆	144	Glycerol	1157975.2974673235	2198118.2085536444	688808.4350224955
60.333333333333336	10	rtg3∆	71	Glycerol	1083167.9953722116	1465351.0284274386	676156.3728766647
60.666666666666664	0	rtg3∆	144	Glycerol	1170088.6829581456	2222173.6472151005	696191.3501939251
60.666666666666664	10	rtg3∆	71	Glycerol	1093834.4309228144	1480096.3942135908	682868.8408326078
61	0	rtg3∆	144	Glycerol	1182162.820587764	2246162.5246467097	703614.4535916478
61	10	rtg3∆	71	Glycerol	1104388.9386918969	1494690.1087506623	689489.8092760949
61.333333333333336	0	rtg3∆	144	Glycerol	1193983.7179370392	2269659.164016255	711065.2788889451
61.333333333333336	10	rtg3∆	71	Glycerol	1114751.449251896	1509021.3003362052	696396.300752442
61.666666666666664	0	rtg3∆	144	Glycerol	1205408.983747225	2292379.5504944194	718594.6074343157
61.666666666666664	10	rtg3∆	71	Glycerol	1125015.7672744996	1523219.5498630083	703366.2159833382
62	0	rtg3∆	144	Glycerol	1216330.6496957727	2314107.718740788	725738.3227672325
62	10	rtg3∆	71	Glycerol	1134956.0067411773	1536972.1994241208	710193.7370394586
62.333333333333336	0	rtg3∆	144	Glycerol	1227170.0390215125	2335681.0585433273	733147.8626751901
62.333333333333336	10	rtg3∆	71	Glycerol	1144581.513223804	1550291.902497574	717347.9101835687
62.666666666666664	0	rtg3∆	144	Glycerol	1237665.837223286	2356578.8966510585	740660.9372794256
62.666666666666664	10	rtg3∆	71	Glycerol	1153874.1378003904	1563153.2777824646	724415.381065945
63	0	rtg3∆	144	Glycerol	1247952.386227851	2377068.0011890717	747877.6461285418
63	10	rtg3∆	71	Glycerol	1162821.9680746505	1575539.5728084932	730716.9460497552
63.333333333333336	0	rtg3∆	144	Glycerol	1258529.5931143828	2398144.1335338317	755481.9001993194
63.333333333333336	10	rtg3∆	71	Glycerol	1171994.1414983426	1588238.5729477245	737563.6286516318
63.666666666666664	0	rtg3∆	144	Glycerol	1269498.9821743723	2420010.317636697	763459.7420468009
63.666666666666664	10	rtg3∆	71	Glycerol	1181432.2229863687	1601307.982862794	744711.9829339527
64	0	rtg3∆	144	Glycerol	1280308.944543744	2441567.1905824556	771363.2971660217
64	10	rtg3∆	71	Glycerol	1190929.1359236247	1614461.1519615008	751894.1527013415
64.33333333333333	0	rtg3∆	144	Glycerol	1291343.8113926644	2463581.1796168787	779550.201376489
64.33333333333333	10	rtg3∆	71	Glycerol	1200817.0799690082	1628158.3208344385	759830.0451599704
64.66666666666667	0	rtg3∆	144	Glycerol	1302578.585452717	2486002.846046022	788256.3164301184
64.66666666666667	10	rtg3∆	71	Glycerol	1210903.923582356	1642133.540795791	768329.3410250327
65	0	rtg3∆	144	Glycerol	1313411.8862490566	2507631.6867772453	796376.6068516271
65	10	rtg3∆	71	Glycerol	1220526.605425166	1655468.0295971783	776083.4095625174
65.33333333333333	0	rtg3∆	144	Glycerol	1323854.360186654	2528487.9898675447	804320.2999381761
65.33333333333333	10	rtg3∆	71	Glycerol	1229743.0508015195	1668241.7263388184	783589.6505319679
65.66666666666667	0	rtg3∆	144	Glycerol	1334432.1387340487	2549622.2315666056	812307.1659359802
65.66666666666667	10	rtg3∆	71	Glycerol	1238991.8462479713	1681062.3524565436	791030.5005355203
66	0	rtg3∆	144	Glycerol	1344288.4802491455	2569321.976888834	819450.8100004838
66	10	rtg3∆	71	Glycerol	1247411.3423641296	1692735.2190780942	797279.9627327853
66.33333333333333	0	rtg3∆	144	Glycerol	1355325.0445304837	2591388.486607938	827234.1042364478
66.33333333333333	10	rtg3∆	71	Glycerol	1256892.6784828107	1705882.281293705	804444.501561961
66.66666666666667	0	rtg3∆	144	Glycerol	1366194.4312105253	2613128.8054222637	834742.237887205
66.66666666666667	10	rtg3∆	71	Glycerol	1266312.2505057917	1718945.8359411033	811693.3948336025
67	0	rtg3∆	144	Glycerol	1377392.627413425	2635535.0948145986	842337.6850860876
67	10	rtg3∆	71	Glycerol	1276090.536475077	1732509.1094839545	819238.8926889001
67.33333333333333	0	rtg3∆	144	Glycerol	1388481.9173104125	2657731.7177083865	849566.8761831237
67.33333333333333	10	rtg3∆	71	Glycerol	1285781.6941182541	1745953.7594784466	826267.1437893206
67.66666666666667	0	rtg3∆	144	Glycerol	1400515.5216490754	2681827.7125227754	857633.4311705317
67.66666666666667	10	rtg3∆	71	Glycerol	1296052.7440622258	1760205.305969198	834049.1861870845
68	0	rtg3∆	144	Glycerol	1410850.3414874699	2702529.665327015	864690.0458293974
68	10	rtg3∆	71	Glycerol	1304853.9220495496	1772419.2937182423	840809.1898808758
68.33333333333333	0	rtg3∆	144	Glycerol	1421206.3244932848	2723280.994522074	871651.5974921748
68.33333333333333	10	rtg3∆	71	Glycerol	1313541.3804197132	1784477.222412681	847044.303452618
68.66666666666667	0	rtg3∆	144	Glycerol	1431167.898711349	2743248.5584461982	878496.8056138125
68.66666666666667	10	rtg3∆	71	Glycerol	1321911.3449674626	1796096.1200606492	853208.9263749034
69	0	rtg3∆	144	Glycerol	1440648.463892324	2762257.8865652727	884899.7407659257
69	10	rtg3∆	71	Glycerol	1329837.0537163531	1807099.792177566	859170.0316248001
69.33333333333333	0	rtg3∆	144	Glycerol	1450160.2712198447	2781335.6295744022	891591.145072834
69.33333333333333	10	rtg3∆	71	Glycerol	1338134.1648478038	1818620.6295450197	865457.485013349
69.66666666666667	0	rtg3∆	144	Glycerol	1460325.8385263183	2801730.9629426585	898489.3411492964
69.66666666666667	10	rtg3∆	71	Glycerol	1346857.7306880886	1830735.29000996	871633.0740803515
70	0	rtg3∆	144	Glycerol	1471699.2662840374	2824557.3693968295	906727.7457214475
70	10	rtg3∆	71	Glycerol	1356732.2746225689	1844450.4047312615	879077.5300213214
70.33333333333333	0	rtg3∆	144	Glycerol	1482991.568454664	2847228.9702346595	914765.2879932643
70.33333333333333	10	rtg3∆	71	Glycerol	1366546.6625293803	1858084.117934213	886499.9169604168
70.66666666666667	0	rtg3∆	144	Glycerol	1494688.4262637312	2870721.155522935	923267.2713334436
70.66666666666667	10	rtg3∆	71	Glycerol	1376664.8244688855	1872142.050023814	894230.1827280284
71	0	rtg3∆	144	Glycerol	1503885.61228235	2889198.8847035193	929665.3560055292
71	10	rtg3∆	71	Glycerol	1384547.4665513106	1883095.562516473	900068.7529001215
71.33333333333333	0	rtg3∆	144	Glycerol	1510800.3470163099	2903094.442928025	934544.8610407376
71.33333333333333	10	rtg3∆	71	Glycerol	1390577.6541312307	1891475.8689561677	904685.5074125932
71.66666666666667	0	rtg3∆	144	Glycerol	1512682.2748005528	2906876.791338514	935875.486081655
71.66666666666667	10	rtg3∆	71	Glycerol	1392237.0893837083	1893782.1675390103	906162.1033937292
0	0	mip1∆	297	Glycerol	11188.555264054581	9998.44251964852	4115.404386014505
0	8	mip1∆	252	Glycerol	9609.054407665322	9998.442519648534	4522.476032537206
0.3333333333333333	0	mip1∆	297	Glycerol	11212.115712267783	10019.242622812544	4110.267674168493
0.3333333333333333	8	mip1∆	252	Glycerol	9637.942769306244	10028.631927969564	4528.327535731122
0.6666666666666666	0	mip1∆	297	Glycerol	11271.928483175798	10072.04535624893	4092.4291806842684
0.6666666666666666	8	mip1∆	252	Glycerol	9713.023844144147	10107.096263479734	4542.57242870877
1.3333333333333333	0	mip1∆	297	Glycerol	11430.68591698369	10212.180126849838	4047.585137503364
1.3333333333333333	8	mip1∆	252	Glycerol	9902.923295509612	10305.564536660975	4575.966484489537
1.6666666666666667	0	mip1∆	297	Glycerol	11505.589908950937	10278.28951241252	4032.686851438594
1.6666666666666667	8	mip1∆	252	Glycerol	9989.427143653336	10395.977177533672	4593.138979689519
2	0	mip1∆	297	Glycerol	11515.108491280269	10286.690129127715	4016.840885452887
2	8	mip1∆	252	Glycerol	10018.321670999025	10426.178100034524	4587.577348092375
2.3333333333333335	0	mip1∆	297	Glycerol	11513.986860536816	10285.700239227095	4017.078162940446
2.3333333333333335	8	mip1∆	252	Glycerol	10033.543339122805	10442.088130341535	4581.438963371863
2.6666666666666665	0	mip1∆	297	Glycerol	11549.343415053865	10316.903439952586	4022.3428404277674
2.6666666666666665	8	mip1∆	252	Glycerol	10077.483830180603	10488.016307087713	4591.36214318966
3	0	mip1∆	297	Glycerol	11573.727940887384	10338.42283057681	4025.605157156177
3	8	mip1∆	252	Glycerol	10112.464180547004	10524.579643867713	4595.687251433786
3.3333333333333335	0	mip1∆	297	Glycerol	11599.770099874335	10361.404481689719	4031.5869486535917
3.3333333333333335	8	mip1∆	252	Glycerol	10148.958792193373	10562.726351610028	4596.544870979184
3.6666666666666665	0	mip1∆	297	Glycerol	11661.699305983318	10416.053190889323	4042.7510625898726
3.6666666666666665	8	mip1∆	252	Glycerol	10212.649621056302	10629.30186027635	4611.960972982187
4	0	mip1∆	297	Glycerol	11718.340244612584	10466.032264196267	4048.522857663866
4	8	mip1∆	252	Glycerol	10271.932083041776	10691.27095501612	4628.242502217253
4.333333333333333	0	mip1∆	297	Glycerol	11705.713433255474	10454.890817381243	4046.362758425615
4.333333333333333	8	mip1∆	252	Glycerol	10283.195246527337	10703.044731272881	4625.43459798406
4.666666666666667	0	mip1∆	297	Glycerol	11711.24098308366	10459.768147520419	4050.523107439272
4.666666666666667	8	mip1∆	252	Glycerol	10307.999432688612	10728.973606049025	4635.90367068533
5	0	mip1∆	297	Glycerol	11717.040179586405	10464.885139997174	4056.108238844862
5	8	mip1∆	252	Glycerol	10330.207994214365	10752.18939292006	4653.794506781467
5.333333333333333	0	mip1∆	297	Glycerol	11756.403833619786	10499.617338350865	4064.9298631529164
5.333333333333333	8	mip1∆	252	Glycerol	10379.336437981407	10803.546727462437	4683.16509669393
5.666666666666667	0	mip1∆	297	Glycerol	11806.943972209878	10544.208960283302	4072.957763223775
5.666666666666667	8	mip1∆	252	Glycerol	10440.70638394381	10867.702423211611	4716.5131375950095
6	0	mip1∆	297	Glycerol	11880.774776589826	10609.34582726739	4086.4331816214785
6	8	mip1∆	252	Glycerol	10512.34428827854	10942.594233741467	4743.137640041307
6.333333333333333	0	mip1∆	297	Glycerol	11936.877578545666	10658.8389840279	4096.446856800109
6.333333333333333	8	mip1∆	252	Glycerol	10569.258784964824	11002.09545294922	4760.560248088089
6.666666666666667	0	mip1∆	297	Glycerol	11980.107988089667	10696.974370009735	4104.0106278611265
6.666666666666667	8	mip1∆	252	Glycerol	10617.170334873103	11052.185624266023	4775.976862835598
7	0	mip1∆	297	Glycerol	11996.129198988841	10711.10694076322	4107.457136474171
7	8	mip1∆	252	Glycerol	10641.010045868818	11077.10973341994	4784.812075675796
7.333333333333333	0	mip1∆	297	Glycerol	12002.031883993239	10716.313737812576	4113.730266109807
7.333333333333333	8	mip1∆	252	Glycerol	10653.762429420016	11090.442284629537	4794.921721430826
7.666666666666667	0	mip1∆	297	Glycerol	12005.949047948363	10719.769076704839	4120.848944775688
7.666666666666667	8	mip1∆	252	Glycerol	10666.301023872697	11103.551387840258	4805.526659997935
8	0	mip1∆	297	Glycerol	12018.22889941224	10730.601072417008	4129.421683948453
8	8	mip1∆	252	Glycerol	10686.119803880381	11124.272062732414	4820.785731334079
8.333333333333334	0	mip1∆	297	Glycerol	12046.67457268182	10755.69234627328	4145.124750410056
8.333333333333334	8	mip1∆	252	Glycerol	10717.551410463757	11157.134371299919	4841.207868893953
8.666666666666666	0	mip1∆	297	Glycerol	12101.580079901569	10804.121211162785	4165.791169033785
8.666666666666666	8	mip1∆	252	Glycerol	10778.10884506643	11220.449431502484	4876.087585473765
9	0	mip1∆	297	Glycerol	12154.082317670029	10850.427816549935	4182.098902397948
9	8	mip1∆	252	Glycerol	10838.77005558726	11283.874538239079	4907.874565777745
9.333333333333334	0	mip1∆	297	Glycerol	12207.489713806723	10897.530289580192	4200.164317148396
9.333333333333334	8	mip1∆	252	Glycerol	10899.02422457993	11346.875579707557	4938.1006712039625
9.666666666666666	0	mip1∆	297	Glycerol	12241.448420882525	10927.478763328523	4205.005324706787
9.666666666666666	8	mip1∆	252	Glycerol	10941.864481479291	11391.6697602636	4958.922220544073
10	0	mip1∆	297	Glycerol	12262.135820987594	10945.722666722982	4201.619986087313
10	8	mip1∆	252	Glycerol	10971.818958188473	11422.990897831409	4967.557655339475
10.333333333333334	0	mip1∆	297	Glycerol	12257.260652515592	10941.423363286201	4190.047945384396
10.333333333333334	8	mip1∆	252	Glycerol	10973.938368930183	11425.207019872129	4962.71672440739
10.666666666666666	0	mip1∆	297	Glycerol	12262.97934774916	10946.466552257047	4181.98702884712
10.666666666666666	8	mip1∆	252	Glycerol	10982.071001086873	11433.710771163565	4956.14239504192
11	0	mip1∆	297	Glycerol	12273.619910895879	10955.850150574715	4177.069132740017
11	8	mip1∆	252	Glycerol	10998.14843811691	11450.521955524957	4957.825378794836
11.333333333333334	0	mip1∆	297	Glycerol	12315.94108034335	10993.170969216375	4192.603725612955
11.333333333333334	8	mip1∆	252	Glycerol	11041.940328482906	11496.312973929103	4976.025441767136
11.666666666666666	0	mip1∆	297	Glycerol	12356.9710168962	11029.3516403167	4214.356052588541
11.666666666666666	8	mip1∆	252	Glycerol	11087.013211526004	11543.444284639463	5001.709607181944
12	0	mip1∆	297	Glycerol	12402.42935332413	11069.43563344171	4241.884369771088
12	8	mip1∆	252	Glycerol	11135.511718780881	11594.158590861918	5026.761912819656
12.333333333333334	0	mip1∆	297	Glycerol	12437.800315961164	11100.623613179923	4266.393973488908
12.333333333333334	8	mip1∆	252	Glycerol	11175.781870007942	11636.26933129967	5050.70845360171
12.666666666666666	0	mip1∆	297	Glycerol	12490.421091762602	11147.01945801071	4279.832054167471
12.666666666666666	8	mip1∆	252	Glycerol	11225.352104721678	11688.106127495244	5069.057521926963
13	0	mip1∆	297	Glycerol	12536.923531938164	11188.018791017554	4285.223652423891
13	8	mip1∆	252	Glycerol	11269.316943985728	11734.082055627514	5084.651383339036
13.333333333333334	0	mip1∆	297	Glycerol	12615.13589129016	11256.9713517191	4295.582771802906
13.333333333333334	8	mip1∆	252	Glycerol	11338.266899726703	11806.187560986333	5114.628277775001
13.666666666666666	0	mip1∆	297	Glycerol	12691.353570488167	11324.160426958488	4306.622502893273
13.666666666666666	8	mip1∆	252	Glycerol	11406.09716252886	11877.12398322918	5145.077285517808
14	0	mip1∆	297	Glycerol	12774.205057905652	11397.191961505892	4324.065854285321
14	8	mip1∆	252	Glycerol	11479.308437627935	11953.689881337217	5181.2798402807985
14.333333333333334	0	mip1∆	297	Glycerol	12823.61996100679	11440.747252318733	4335.790587968478
14.333333333333334	8	mip1∆	252	Glycerol	11525.012701178339	12001.489438963783	5204.32871857046
14.666666666666666	0	mip1∆	297	Glycerol	12860.06044296066	11472.865329549173	4343.498684476086
14.666666666666666	8	mip1∆	252	Glycerol	11560.005788734228	12038.087326102315	5219.583103319868
15	0	mip1∆	297	Glycerol	12865.900304544828	11478.012391083317	4343.837535398678
15	8	mip1∆	252	Glycerol	11570.295424308419	12048.84894060769	5222.399449456471
15.333333333333334	0	mip1∆	297	Glycerol	12867.025243197657	11479.003871699198	4342.48359060849
15.333333333333334	8	mip1∆	252	Glycerol	11575.972577463228	12054.786518855904	5221.073648716218
15.666666666666666	0	mip1∆	297	Glycerol	12859.200267452512	11472.107196823272	4340.401360535774
15.666666666666666	8	mip1∆	252	Glycerol	11575.968629060513	12054.78238932579	5221.069448705044
16	0	mip1∆	297	Glycerol	12866.672032735965	11478.692564768351	4346.799034693138
16	8	mip1∆	252	Glycerol	11590.78950982763	12070.28320005566	5234.6395294103295
16.333333333333332	0	mip1∆	297	Glycerol	12876.122102774552	11487.021479330222	4354.495474755152
16.333333333333332	8	mip1∆	252	Glycerol	11607.073599093092	12087.314445136582	5247.642709623598
16.666666666666668	0	mip1∆	297	Glycerol	12899.0151698708	11507.198209375158	4362.005171526268
16.666666666666668	8	mip1∆	252	Glycerol	11634.622643009281	12116.127745494148	5262.960184389493
17	0	mip1∆	297	Glycerol	12918.566576016625	11524.429435410042	4370.734738627566
17	8	mip1∆	252	Glycerol	11659.97954243838	12142.648562612741	5285.92564178943
17.333333333333332	0	mip1∆	297	Glycerol	12943.339944934494	11546.26247817451	4379.503597478386
17.333333333333332	8	mip1∆	252	Glycerol	11689.18649826523	12173.196468759466	5307.001644763234
17.666666666666668	0	mip1∆	297	Glycerol	12951.979157638638	11553.876192843085	4387.852549559354
17.666666666666668	8	mip1∆	252	Glycerol	11703.32629819947	12187.985574291188	5318.9423636551555
18	0	mip1∆	297	Glycerol	12957.906079768985	11559.099537768472	4398.558349766827
18	8	mip1∆	252	Glycerol	11714.725362338455	12199.908144633522	5332.423500522111
18.333333333333332	0	mip1∆	297	Glycerol	12957.240674410328	11558.513123249555	4409.881746357208
18.333333333333332	8	mip1∆	252	Glycerol	11718.813919739074	12204.18448278034	5343.63447687427
18.666666666666668	0	mip1∆	297	Glycerol	12981.432946580271	11579.83327673326	4412.383875164736
18.666666666666668	8	mip1∆	252	Glycerol	11742.245149764476	12228.691995410738	5352.872991784029
19	0	mip1∆	297	Glycerol	13005.767112442749	11601.277994696817	4412.26007197545
19	8	mip1∆	252	Glycerol	11765.92237089039	12253.45701360109	5359.601225464115
19.333333333333332	0	mip1∆	297	Glycerol	13041.289960157896	11632.581977516844	4407.831384292822
19.333333333333332	8	mip1∆	252	Glycerol	11798.422943956692	12287.451104384083	5367.827098508515
19.666666666666668	0	mip1∆	297	Glycerol	13078.251033778588	11665.15228371845	4403.233280561373
19.666666666666668	8	mip1∆	252	Glycerol	11830.319463715865	12320.813777845611	5373.084929856127
20	0	mip1∆	297	Glycerol	13116.34675037297	11698.721281684386	4404.393689705356
20	8	mip1∆	252	Glycerol	11865.969273475213	12358.102725899384	5383.919181437592
20.333333333333332	0	mip1∆	297	Glycerol	13139.414983986322	11719.047863454978	4410.990590594132
20.333333333333332	8	mip1∆	252	Glycerol	11891.015457446461	12384.30079565839	5392.734623769374
20.666666666666668	0	mip1∆	297	Glycerol	13162.254302989444	11739.172312932302	4418.9230336387145
20.666666666666668	8	mip1∆	252	Glycerol	11914.788367312221	12409.167253955062	5403.9176345572105
21	0	mip1∆	297	Glycerol	13198.86250708022	11771.428086016633	4436.572061784108
21	8	mip1∆	252	Glycerol	11949.25939024371	12445.224317714252	5423.957160993178
21.333333333333332	0	mip1∆	297	Glycerol	13233.08237179847	11801.578498759634	4455.968601333392
21.333333333333332	8	mip1∆	252	Glycerol	11982.005892192983	12479.477931169926	5446.873118293519
21.666666666666668	0	mip1∆	297	Glycerol	13263.522922354892	11828.398245687116	4464.4477404296
21.666666666666668	8	mip1∆	252	Glycerol	12009.669901334011	12508.415453294934	5463.935216307828
22	0	mip1∆	297	Glycerol	13278.087891325187	11841.230496639222	4473.733466351459
22	8	mip1∆	252	Glycerol	12023.612275373884	12522.99977415919	5474.523551102976
22.333333333333332	0	mip1∆	297	Glycerol	13290.586638049086	11852.242197591402	4486.0357495758835
22.333333333333332	8	mip1∆	252	Glycerol	12036.934167783957	12536.935113082602	5486.215065824464
22.666666666666668	0	mip1∆	297	Glycerol	13285.637153857622	11847.881596150533	4487.092004595151
22.666666666666668	8	mip1∆	252	Glycerol	12037.386276523333	12537.408041698118	5488.12805906996
23	0	mip1∆	297	Glycerol	13312.39469946486	11871.455332952908	4487.595584850906
23	8	mip1∆	252	Glycerol	12064.984150340082	12566.276959595722	5500.115450722204
23.333333333333332	0	mip1∆	297	Glycerol	13366.576708853703	11919.188620588813	4492.339210868479
23.333333333333332	8	mip1∆	252	Glycerol	12119.301007629738	12623.096261889274	5520.5710510960935
23.666666666666668	0	mip1∆	297	Glycerol	13434.366597233506	11978.906896871056	4491.739570078511
23.666666666666668	8	mip1∆	252	Glycerol	12183.401291403881	12690.15114391008	5543.321569261394
24	0	mip1∆	297	Glycerol	13504.638839258556	12040.80812079353	4490.151531404131
24	8	mip1∆	252	Glycerol	12247.134339591028	12756.823378342186	5563.303610991178
24.333333333333332	0	mip1∆	297	Glycerol	13570.413400695088	12098.743919020983	4495.022658611792
24.333333333333332	8	mip1∆	252	Glycerol	12304.23115812302	12816.554615717747	5583.701677951778
24.666666666666668	0	mip1∆	297	Glycerol	13601.754268499035	12126.348508263809	4500.398672410996
24.666666666666668	8	mip1∆	252	Glycerol	12331.12820265543	12844.693092887177	5592.664061488838
25	0	mip1∆	297	Glycerol	13603.470838233607	12127.860416217163	4507.755172819629
25	8	mip1∆	252	Glycerol	12327.128834095394	12840.509116697738	5587.658952659696
25.333333333333332	0	mip1∆	297	Glycerol	13611.70691558363	12135.114497223934	4518.265641957507
25.333333333333332	8	mip1∆	252	Glycerol	12331.0968111991	12844.660252403633	5589.206436337347
25.666666666666668	0	mip1∆	297	Glycerol	13617.15138724439	12139.909789612415	4524.933926137119
25.666666666666668	8	mip1∆	252	Glycerol	12336.527902668136	12850.342048025772	5591.325582528016
26	0	mip1∆	297	Glycerol	13628.986144863562	12150.333333415543	4526.101696571445
26	8	mip1∆	252	Glycerol	12350.267081547196	12864.715488341113	5593.748774716999
26.333333333333332	0	mip1∆	297	Glycerol	13645.48697394174	12164.866369375857	4528.689298014397
26.333333333333332	8	mip1∆	252	Glycerol	12370.5312757094	12885.91529398034	5599.711244950862
26.666666666666668	0	mip1∆	297	Glycerol	13666.06546859394	12182.990495149688	4535.21660617067
26.666666666666668	8	mip1∆	252	Glycerol	12395.08913597075	12911.607208763686	5614.481055157296
27	0	mip1∆	297	Glycerol	13675.428877475622	12191.237034065607	4541.063005193695
27	8	mip1∆	252	Glycerol	12406.71145788282	12923.766313398699	5620.601247360135
27.333333333333332	0	mip1∆	297	Glycerol	13689.742451557438	12203.843149496653	4554.616064249696
27.333333333333332	8	mip1∆	252	Glycerol	12419.66197861492	12937.315018494863	5629.413850273078
27.666666666666668	0	mip1∆	297	Glycerol	13698.417488923886	12211.483268867023	4573.920305957601
27.666666666666668	8	mip1∆	252	Glycerol	12427.148352635182	12945.14721593972	5640.5847060310325
28	0	mip1∆	297	Glycerol	13700.568688681891	12213.377824923302	4589.663857614428
28	8	mip1∆	252	Glycerol	12426.72668811873	12944.706072629671	5648.576934234321
28.333333333333332	0	mip1∆	297	Glycerol	13705.137826010528	12217.40184043184	4603.063090782097
28.333333333333332	8	mip1∆	252	Glycerol	12428.429162863966	12946.487193598408	5653.689817928113
28.666666666666668	0	mip1∆	297	Glycerol	13718.169410960574	12228.878600715558	4618.499600213552
28.666666666666668	8	mip1∆	252	Glycerol	12439.393893771787	12957.95846815965	5668.188163451846
29	0	mip1∆	297	Glycerol	13726.896018797892	12236.563945851134	4626.9336765808985
29	8	mip1∆	252	Glycerol	12447.583500227674	12966.526442907416	5681.2163908945895
29.333333333333332	0	mip1∆	297	Glycerol	13742.153405950874	12250.000673246177	4634.027536893969
29.333333333333332	8	mip1∆	252	Glycerol	12461.41925509421	12981.001479429162	5693.639231631405
30	0	mip1∆	297	Glycerol	13788.938018193738	12291.201369641727	4658.303160796587
30	8	mip1∆	252	Glycerol	12507.215978433158	13028.914738525042	5736.400680629657
30.333333333333332	0	mip1∆	297	Glycerol	13808.240996655462	12308.199974763042	4667.584426619945
30.333333333333332	8	mip1∆	252	Glycerol	12525.796528265424	13048.354221640984	5753.948436491503
30.666666666666668	0	mip1∆	297	Glycerol	13826.569099827118	12324.339819073848	4681.3749093792
30.666666666666668	8	mip1∆	252	Glycerol	12542.28723484899	13065.607357808121	5772.561807232077
31	0	mip1∆	297	Glycerol	13837.891639379837	12334.310390482482	4691.511749042164
31	8	mip1∆	252	Glycerol	12550.418059489486	13074.114138311284	5781.489674509831
31.333333333333332	0	mip1∆	297	Glycerol	13841.234057570322	12337.25368832005	4697.753714721169
31.333333333333332	8	mip1∆	252	Glycerol	12550.528193817103	13074.229365231668	5783.497877953806
31.666666666666668	0	mip1∆	297	Glycerol	13841.549643050053	12337.531589087224	4704.678751301902
31.666666666666668	8	mip1∆	252	Glycerol	12548.60440550871	13072.216621905603	5784.741839235943
32	0	mip1∆	297	Glycerol	13836.330289673755	12332.935479632331	4709.9463800376325
32	8	mip1∆	252	Glycerol	12546.59950245174	13070.119014547545	5788.691789910044
32.333333333333336	0	mip1∆	297	Glycerol	13828.698067782245	12326.214585068654	4709.6066495291
32.333333333333336	8	mip1∆	252	Glycerol	12544.213083933626	13067.622252805884	5790.4390765770695
32.666666666666664	0	mip1∆	297	Glycerol	13827.358833670563	12325.03525792064	4717.084992327189
32.666666666666664	8	mip1∆	252	Glycerol	12547.86956010482	13071.447797967314	5802.3836892211375
33	0	mip1∆	297	Glycerol	13831.43788503626	12328.627258918284	4724.699964346614
33	8	mip1∆	252	Glycerol	12555.51244595432	13079.444092932856	5814.663980307539
33.333333333333336	0	mip1∆	297	Glycerol	13834.948715060546	12331.718875590619	4731.8784622203975
33.333333333333336	8	mip1∆	252	Glycerol	12560.964476459803	13085.14823969441	5825.3948842502905
33.666666666666664	0	mip1∆	297	Glycerol	13844.444071920774	12340.080384675824	4738.8297689793835
33.666666666666664	8	mip1∆	252	Glycerol	12567.024083838507	13091.488071868494	5831.10066774721
34	0	mip1∆	297	Glycerol	13861.790288880313	12355.355098100374	4747.35060467923
34	8	mip1∆	252	Glycerol	12579.999745111127	13105.063833382308	5839.738185536614
34.333333333333336	0	mip1∆	297	Glycerol	13877.182296330213	12368.908782689947	4744.502224228698
34.333333333333336	8	mip1∆	252	Glycerol	12593.629852699505	13119.324373459274	5845.311916671727
34.666666666666664	0	mip1∆	297	Glycerol	13894.084246573633	12383.79186327017	4739.902618199581
34.666666666666664	8	mip1∆	252	Glycerol	12608.833453134937	13135.231263922153	5848.259956647337
35	0	mip1∆	297	Glycerol	13917.350871148652	12404.27902634896	4734.621596926168
35	8	mip1∆	252	Glycerol	12629.030257030945	13156.36246254527	5848.920450094404
35.333333333333336	0	mip1∆	297	Glycerol	13941.101207110192	12425.191689885825	4732.589235293862
35.333333333333336	8	mip1∆	252	Glycerol	12648.536431060656	13176.771218631236	5849.5800028055655
35.666666666666664	0	mip1∆	297	Glycerol	13961.372079206038	12443.040273329969	4733.575657183305
35.666666666666664	8	mip1∆	252	Glycerol	12665.999995411685	13195.042965876028	5852.487360556315
36	0	mip1∆	297	Glycerol	13987.139267417288	12465.727933764563	4742.024371943208
36	8	mip1∆	252	Glycerol	12686.035054200458	13216.005346180438	5855.43156551556
36.333333333333336	0	mip1∆	297	Glycerol	14010.755373022557	12486.521152251824	4749.1262553372735
36.333333333333336	8	mip1∆	252	Glycerol	12704.959146614221	13235.805470797713	5861.753438101957
36.666666666666664	0	mip1∆	297	Glycerol	14029.45563593656	12502.985829988496	4758.2267438480785
36.666666666666664	8	mip1∆	252	Glycerol	12722.784016269428	13254.455604385805	5875.043231541641
37	0	mip1∆	297	Glycerol	14048.538172154189	12519.78680798109	4766.012979928981
37	8	mip1∆	252	Glycerol	12741.450005872051	13273.985921794196	5890.295437608246
37.333333333333336	0	mip1∆	297	Glycerol	14064.976726768757	12534.259705027278	4772.530035611589
37.333333333333336	8	mip1∆	252	Glycerol	12756.76527117581	13290.010452336119	5902.264116374604
37.666666666666664	0	mip1∆	297	Glycerol	14077.533419068852	12545.314780077475	4780.264973826792
37.666666666666664	8	mip1∆	252	Glycerol	12770.290469273912	13304.162085168502	5920.788956942121
38	0	mip1∆	297	Glycerol	14090.2318584391	12556.494530115704	4792.461374705893
38	8	mip1∆	252	Glycerol	12783.344309239284	13317.820589957566	5935.695594856002
38.333333333333336	0	mip1∆	297	Glycerol	14104.539268671864	12569.090678065428	4803.040781110656
38.333333333333336	8	mip1∆	252	Glycerol	12797.417976957102	13332.546229455476	5948.858810133602
38.666666666666664	0	mip1∆	297	Glycerol	14114.565979094528	12577.918034761407	4809.872168344559
38.666666666666664	8	mip1∆	252	Glycerol	12808.204398973297	13343.832386952286	5958.9359278926395
39	0	mip1∆	297	Glycerol	14124.459844310468	12586.628362496482	4817.849910005665
39	8	mip1∆	252	Glycerol	12818.555462622428	13354.66305461925	5964.554463698256
39.333333333333336	0	mip1∆	297	Glycerol	14129.361914828187	12590.94400355685	4820.742980004173
39.333333333333336	8	mip1∆	252	Glycerol	12823.57139037442	13359.911402947266	5961.085292645824
39.666666666666664	0	mip1∆	297	Glycerol	14132.699668881385	12593.882455323235	4819.872049846722
39.666666666666664	8	mip1∆	252	Glycerol	12827.525431459719	13364.04866675671	5956.706068205123
40	0	mip1∆	297	Glycerol	14135.993665697208	12596.782376411487	4817.928038319092
40	8	mip1∆	252	Glycerol	12830.691938274918	13367.361907443123	5952.188008904018
40.666666666666664	0	mip1∆	297	Glycerol	14147.001049251745	12606.472837796498	4817.143171505564
40.666666666666664	8	mip1∆	252	Glycerol	12844.023583119135	13381.31137089689	5953.870492257357
41	0	mip1∆	297	Glycerol	14155.034435615415	12613.54505327305	4817.8034399933385
41	8	mip1∆	252	Glycerol	12853.776710533313	13391.516520049086	5959.0619344168035
41.333333333333336	0	mip1∆	297	Glycerol	14165.593009127642	12622.84025109908	4821.874058042297
41.333333333333336	8	mip1∆	252	Glycerol	12863.976263613256	13402.18882094152	5967.609412067612
41.666666666666664	0	mip1∆	297	Glycerol	14174.446421705014	12630.634252913329	4824.452375181186
41.666666666666664	8	mip1∆	252	Glycerol	12872.89862281481	13411.524760261327	5973.371646557526
42	0	mip1∆	297	Glycerol	14173.974666575856	12630.2189500927	4814.9905856597625
42	8	mip1∆	252	Glycerol	12873.001649104861	13411.632562315857	5966.379121280895
42.333333333333336	0	mip1∆	297	Glycerol	14188.734173192955	12643.21218979485	4817.941816581565
42.333333333333336	8	mip1∆	252	Glycerol	12882.888273111399	13421.977496318494	5969.325831232234
42.666666666666664	0	mip1∆	297	Glycerol	14205.365423601424	12657.852986756425	4818.299961413509
42.666666666666664	8	mip1∆	252	Glycerol	12893.927541545512	13433.528548028358	5972.447112252196
43	0	mip1∆	297	Glycerol	14224.574646062694	12674.762962815856	4816.580930400868
43	8	mip1∆	252	Glycerol	12910.449771619558	13450.816832892546	5977.473169863328
43.333333333333336	0	mip1∆	297	Glycerol	14248.767273007463	12696.0594632504	4821.582351100669
43.333333333333336	8	mip1∆	252	Glycerol	12931.263493052604	13472.595720921403	5987.2831640486
44	0	mip1∆	297	Glycerol	14304.872729509596	12745.44679511438	4841.511126283066
44	8	mip1∆	252	Glycerol	12984.202022761483	13527.989781272492	6021.699444717293
44.333333333333336	0	mip1∆	297	Glycerol	14327.835554268571	12765.6593533895	4849.33788140228
44.333333333333336	8	mip1∆	252	Glycerol	13008.162927106841	13553.062423580539	6035.271854280072
44.666666666666664	0	mip1∆	297	Glycerol	14348.99001879936	12784.279793604917	4861.07342622789
44.666666666666664	8	mip1∆	252	Glycerol	13027.444416996112	13573.238681257526	6048.411978420221
45	0	mip1∆	297	Glycerol	14366.500896088792	12799.692849477844	4869.795805314353
45	8	mip1∆	252	Glycerol	13043.102860680643	13589.623858532159	6056.845535757486
45.333333333333336	0	mip1∆	297	Glycerol	14382.907927684539	12814.134095873389	4880.75314336331
45.333333333333336	8	mip1∆	252	Glycerol	13056.306286706169	13603.440143044056	6063.353203831048
45.666666666666664	0	mip1∆	297	Glycerol	14394.561176586303	12824.391006588537	4889.914469122845
45.666666666666664	8	mip1∆	252	Glycerol	13063.437467626902	13610.902354497164	6065.616983962065
46	0	mip1∆	297	Glycerol	14398.575881663663	12827.924630685955	4896.09362572213
46	8	mip1∆	252	Glycerol	13065.426893593258	13612.98413307603	6066.0631260230975
46.333333333333336	0	mip1∆	297	Glycerol	14400.836182996234	12829.914075515975	4898.897907903146
46.333333333333336	8	mip1∆	252	Glycerol	13066.186314826975	13613.778808325982	6061.039855879579
46.666666666666664	0	mip1∆	297	Glycerol	14404.530122586119	12833.16535470916	4902.764612329967
46.666666666666664	8	mip1∆	252	Glycerol	13070.187906280036	13617.966165824566	6060.658604629894
47	0	mip1∆	297	Glycerol	14408.646074697821	12836.788063032562	4906.971808216386
47	8	mip1∆	252	Glycerol	13075.707463918812	13623.741967228181	6063.740457056563
47.333333333333336	0	mip1∆	297	Glycerol	14415.518715598302	12842.83707871534	4909.834946713865
47.333333333333336	8	mip1∆	252	Glycerol	13085.356163485449	13633.838630067661	6070.027143681277
47.666666666666664	0	mip1∆	297	Glycerol	14427.206202063684	12853.123843436739	4915.713914333016
47.666666666666664	8	mip1∆	252	Glycerol	13097.843774073866	13646.906054836933	6078.043539926992
48	0	mip1∆	297	Glycerol	14437.577752673938	12862.25230037961	4919.361792209046
48	8	mip1∆	252	Glycerol	13110.851931507546	13660.518253430031	6088.623410381444
48.333333333333336	0	mip1∆	297	Glycerol	14444.553166201998	12868.391623509633	4921.5872253902835
48.333333333333336	8	mip1∆	252	Glycerol	13118.36616624433	13668.381442574908	6094.9157812829035
48.666666666666664	0	mip1∆	297	Glycerol	14452.141852707662	12875.0706705756	4921.529819043812
48.666666666666664	8	mip1∆	252	Glycerol	13126.801176824758	13677.208190820518	6101.4303554834705
49	0	mip1∆	297	Glycerol	14461.152939596765	12883.001563023718	4922.7711496841075
49	8	mip1∆	252	Glycerol	13136.192849680383	13687.036059432303	6108.2874181401285
49.333333333333336	0	mip1∆	297	Glycerol	14469.910951138052	12890.709660133529	4922.283630861662
49.333333333333336	8	mip1∆	252	Glycerol	13146.5274214143	13697.850654983888	6114.059155590872
49.666666666666664	0	mip1∆	297	Glycerol	14480.651338899437	12900.162408468646	4923.106754209052
49.666666666666664	8	mip1∆	252	Glycerol	13158.334341955717	13710.2060325848	6118.709828968249
50	0	mip1∆	297	Glycerol	14494.273781439604	12912.151567263945	4923.498644273692
50	8	mip1∆	252	Glycerol	13175.913850479696	13728.602236364944	6129.669107520088
50.333333333333336	0	mip1∆	297	Glycerol	14508.348290171554	12924.538448309695	4924.8290867376845
50.333333333333336	8	mip1∆	252	Glycerol	13189.231041198069	13742.538177649203	6127.950184690605
50.666666666666664	0	mip1∆	297	Glycerol	14521.382928188612	12936.010016799219	4927.147845802648
50.666666666666664	8	mip1∆	252	Glycerol	13200.630719696817	13754.467562638607	6125.0200386367505
51	0	mip1∆	297	Glycerol	14532.685454204915	12945.957081719938	4932.892293440443
51	8	mip1∆	252	Glycerol	13208.119743411926	13762.304601551656	6124.085936117967
51.333333333333336	0	mip1∆	297	Glycerol	14542.562793067835	12954.64979935441	4939.662820616154
51.333333333333336	8	mip1∆	252	Glycerol	13212.730181018142	13767.129295930212	6122.590898813973
51.666666666666664	0	mip1∆	297	Glycerol	14553.817228374985	12964.554366990962	4946.31763181287
51.666666666666664	8	mip1∆	252	Glycerol	13215.58672996213	13770.118598395435	6115.845577525828
52	0	mip1∆	297	Glycerol	14564.53461354575	12973.98621290755	4953.709889955136
52	8	mip1∆	252	Glycerol	13220.939461488882	13775.720097052836	6113.416943126333
52.333333333333336	0	mip1∆	297	Glycerol	14576.629495349644	12984.630225607696	4958.114031257435
52.333333333333336	8	mip1∆	252	Glycerol	13228.966908973145	13784.120636970776	6112.771904421063
52.666666666666664	0	mip1∆	297	Glycerol	14594.240428255622	13000.128408452054	4957.992025874021
52.666666666666664	8	mip1∆	252	Glycerol	13242.436969020524	13798.216795874589	6108.009152382139
53	0	mip1∆	297	Glycerol	14611.688968689536	13015.483458246508	4958.114001804823
53	8	mip1∆	252	Glycerol	13256.59645701981	13813.034494835492	6104.006890500432
53.333333333333336	0	mip1∆	297	Glycerol	14629.261375468477	13030.947289242618	4957.031597403804
53.333333333333336	8	mip1∆	252	Glycerol	13273.448400335446	13830.669898605178	6105.715425365992
53.666666666666664	0	mip1∆	297	Glycerol	14643.985943710702	13043.904831452295	4957.80456205371
53.666666666666664	8	mip1∆	252	Glycerol	13290.826628118079	13848.856155807094	6116.602022602206
54	0	mip1∆	297	Glycerol	14654.550113287773	13053.201147990161	4958.706798856891
54	8	mip1∆	252	Glycerol	13303.788317075818	13862.420586984297	6123.479449880754
54.333333333333336	0	mip1∆	297	Glycerol	14661.265063030358	13059.110164680451	4962.9663631408885
54.333333333333336	8	mip1∆	252	Glycerol	13314.383480388895	13873.50848727522	6132.281073728908
54.666666666666664	0	mip1∆	297	Glycerol	14672.160185564682	13068.697577393206	4965.517476049915
54.666666666666664	8	mip1∆	252	Glycerol	13326.097397197154	13885.767214118778	6136.92153483283
55	0	mip1∆	297	Glycerol	14680.796089236763	13076.296877683844	4968.305191651626
55	8	mip1∆	252	Glycerol	13333.08922647516	13893.084253096129	6132.4636458657205
55.333333333333336	0	mip1∆	297	Glycerol	14690.28565679431	13084.647310854616	4967.374010623127
55.333333333333336	8	mip1∆	252	Glycerol	13339.548796708634	13899.844290930881	6122.950533852699
55.666666666666664	0	mip1∆	297	Glycerol	14701.15743366186	13094.213951978158	4970.207168653898
55.666666666666664	8	mip1∆	252	Glycerol	13347.067500931867	13907.712746343668	6117.591561283409
56	0	mip1∆	297	Glycerol	14710.506909564638	13102.440973159695	4972.114152138261
56	8	mip1∆	252	Glycerol	13354.36761776648	13915.352464603948	6115.067691521013
56.333333333333336	0	mip1∆	297	Glycerol	14716.500827220549	13107.715255673013	4975.261096350239
56.333333333333336	8	mip1∆	252	Glycerol	13360.411495997012	13921.67751773071	6116.918144604935
56.666666666666664	0	mip1∆	297	Glycerol	14724.539638533404	13114.788879390811	4980.4834747686
56.666666666666664	8	mip1∆	252	Glycerol	13368.908559172185	13930.569904478769	6124.87932054401
57	0	mip1∆	297	Glycerol	14736.508623709662	13125.320710565331	4984.928769964542
57	8	mip1∆	252	Glycerol	13381.10251577657	13943.331224398671	6133.809944207731
57.333333333333336	0	mip1∆	297	Glycerol	14751.402261664949	13138.42587810505	4988.401617824796
57.333333333333336	8	mip1∆	252	Glycerol	13394.26169941522	13957.10273817754	6141.352771300267
57.666666666666664	0	mip1∆	297	Glycerol	14767.188595520158	13152.3163698325	4989.070699754608
57.666666666666664	8	mip1∆	252	Glycerol	13407.384658844489	13970.836400508078	6147.063022073147
58	0	mip1∆	297	Glycerol	14780.94450016614	13164.42012842022	4989.187342168032
58	8	mip1∆	252	Glycerol	13418.594590450799	13982.56805459439	6151.787708858841
58.333333333333336	0	mip1∆	297	Glycerol	14791.919585955726	13174.07695954849	4990.639125128168
58.333333333333336	8	mip1∆	252	Glycerol	13427.091095368549	13991.460024430584	6154.356143938853
58.666666666666664	0	mip1∆	297	Glycerol	14797.865214787038	13179.308402698833	4992.893921270411
58.666666666666664	8	mip1∆	252	Glycerol	13430.661737392404	13995.196867201545	6155.838665455018
59	0	mip1∆	297	Glycerol	14802.004798538184	13182.950726942145	4991.790795238432
59	8	mip1∆	252	Glycerol	13434.459116248303	13999.171005323431	6155.446395844043
59.333333333333336	0	mip1∆	297	Glycerol	14807.455082310398	13187.746287156979	4993.36624859304
59.333333333333336	8	mip1∆	252	Glycerol	13441.004235025164	14006.020795770417	6157.238142824828
59.666666666666664	0	mip1∆	297	Glycerol	14814.22924606766	13193.70666459831	5000.588182975835
59.666666666666664	8	mip1∆	252	Glycerol	13449.50542967543	14014.917737913845	6162.574810728093
60	0	mip1∆	297	Glycerol	14820.911800537691	13199.58640564262	5005.117277364542
60	8	mip1∆	252	Glycerol	13457.645362227275	14023.436623319845	6166.292744544471
60.333333333333336	0	mip1∆	297	Glycerol	14827.172721253144	13205.095137184664	5007.928945289705
60.333333333333336	8	mip1∆	252	Glycerol	13464.84173835487	14030.968043819386	6166.766583974819
60.666666666666664	0	mip1∆	297	Glycerol	14832.319072084454	13209.623182639956	5013.105333105562
60.666666666666664	8	mip1∆	252	Glycerol	13470.806334694456	14037.210349314253	6168.329795245175
61	0	mip1∆	297	Glycerol	14833.038506511955	13210.25617951975	5019.399575600408
61	8	mip1∆	252	Glycerol	13468.651973475438	14034.955680540384	6166.667046780162
61.333333333333336	0	mip1∆	297	Glycerol	14833.064098560906	13210.278696766058	5019.833340803143
61.333333333333336	8	mip1∆	252	Glycerol	13467.867944008089	14034.135146868051	6165.1352214024955
61.666666666666664	0	mip1∆	297	Glycerol	14834.777251028692	13211.786018392608	5018.625595379673
61.666666666666664	8	mip1∆	252	Glycerol	13470.276095991323	14036.655422429976	6165.738025647377
62	0	mip1∆	297	Glycerol	14839.422102394703	13215.87279230793	5019.650853926957
62	8	mip1∆	252	Glycerol	13477.802107867326	14044.5318580681	6176.846719851465
62.333333333333336	0	mip1∆	297	Glycerol	14838.937774734519	13215.446657186603	5023.098034488427
62.333333333333336	8	mip1∆	252	Glycerol	13481.266432403523	14048.157493781186	6187.555337516522
62.666666666666664	0	mip1∆	297	Glycerol	14843.670443890851	13219.61068337959	5019.930662172961
62.666666666666664	8	mip1∆	252	Glycerol	13492.549081459829	14059.965530766895	6199.382735970914
63	0	mip1∆	297	Glycerol	14849.124829440185	13224.409689929435	5019.233463831049
63	8	mip1∆	252	Glycerol	13500.51669925813	14068.304194490775	6205.826905636731
63.333333333333336	0	mip1∆	297	Glycerol	14855.296543918332	13229.839808146817	5020.199555217014
63.333333333333336	8	mip1∆	252	Glycerol	13506.362504595902	14074.422248113597	6206.228211318745
63.666666666666664	0	mip1∆	297	Glycerol	14855.604547558158	13230.11080120407	5025.4750017227225
63.666666666666664	8	mip1∆	252	Glycerol	13503.67263502548	14071.607105691035	6198.253502987537
64	0	mip1∆	297	Glycerol	14859.935219638495	13233.921080386122	5028.647487618951
64	8	mip1∆	252	Glycerol	13503.645818527812	14071.579040305225	6191.417835994199
64.33333333333333	0	mip1∆	297	Glycerol	14858.810516126552	13232.931527559062	5038.065763161919
64.33333333333333	8	mip1∆	252	Glycerol	13498.179170424884	14065.857806500208	6184.896008239643
64.66666666666667	0	mip1∆	297	Glycerol	14859.409577958175	13233.458602872028	5038.771418009832
64.66666666666667	8	mip1∆	252	Glycerol	13498.672869191745	14066.374496758626	6185.242389311733
65	0	mip1∆	297	Glycerol	14857.088366643606	13231.416319470172	5041.195387433464
65	8	mip1∆	252	Glycerol	13498.3081438677	14065.992786212671	6191.8563878340365
65.33333333333333	0	mip1∆	297	Glycerol	14859.25701770379	13233.324375109521	5039.869285649521
65.33333333333333	8	mip1∆	252	Glycerol	13503.647042502706	14071.580321282609	6201.5424386805935
65.66666666666667	0	mip1∆	297	Glycerol	14864.108974172355	13237.593285258545	5039.692422382811
65.66666666666667	8	mip1∆	252	Glycerol	13513.319385390634	14081.703136660031	6212.2178823872
66	0	mip1∆	297	Glycerol	14871.599852423631	13244.183972179528	5036.489321814508
66	8	mip1∆	252	Glycerol	13523.95627390923	14092.83545593286	6220.225792901835
66.33333333333333	0	mip1∆	297	Glycerol	14877.317480557347	13249.214476456196	5042.422329176198
66.33333333333333	8	mip1∆	252	Glycerol	13529.951079721197	14099.10949649798	6225.660998548266
66.66666666666667	0	mip1∆	297	Glycerol	14884.35616814119	13255.40724801257	5048.164678124341
66.66666666666667	8	mip1∆	252	Glycerol	13537.25933955158	14106.758187333804	6231.617391823892
67	0	mip1∆	297	Glycerol	14892.550331349148	13262.616584555326	5053.254895393972
67	8	mip1∆	252	Glycerol	13544.950260701775	14114.80738381155	6236.440980180883
67.33333333333333	0	mip1∆	297	Glycerol	14897.610009261458	13267.068134289204	5057.057257822796
67.33333333333333	8	mip1∆	252	Glycerol	13549.192226638543	14119.246966764702	6244.980775743969
67.66666666666667	0	mip1∆	297	Glycerol	14902.442782968006	13271.320034650189	5063.476302883607
67.66666666666667	8	mip1∆	252	Glycerol	13554.719941555571	14125.03220587436	6256.069998242745
68	0	mip1∆	297	Glycerol	14907.011847002661	13275.339906523102	5066.783649700389
68	8	mip1∆	252	Glycerol	13560.811298147213	14131.407357331671	6265.137689861253
68.33333333333333	0	mip1∆	297	Glycerol	14910.861911749264	13278.727189814248	5067.237071237467
68.33333333333333	8	mip1∆	252	Glycerol	13566.122837935158	14136.966370628721	6271.765465268525
68.66666666666667	0	mip1∆	297	Glycerol	14914.472671848824	13281.903923517753	5070.4017863624085
68.66666666666667	8	mip1∆	252	Glycerol	13571.604046214923	14142.702967440453	6279.151207577429
69	0	mip1∆	297	Glycerol	14916.953186555358	13284.086266027629	5072.50688157387
69	8	mip1∆	252	Glycerol	13576.557962313227	14147.8877123308	6282.925392991761
69.33333333333333	0	mip1∆	297	Glycerol	14914.673658033867	13282.080750165353	5075.358247402865
69.33333333333333	8	mip1∆	252	Glycerol	13577.847549497263	14149.237389453012	6288.069064050617
69.66666666666667	0	mip1∆	297	Glycerol	14909.665642819458	13277.674714681	5079.382264970751
69.66666666666667	8	mip1∆	252	Glycerol	13576.432849916242	14147.756770193737	6293.792402277221
70	0	mip1∆	297	Glycerol	14905.030161659946	13273.596417535266	5083.683567931435
70	8	mip1∆	252	Glycerol	13574.657385425091	14145.898576682443	6300.276699109736
70.33333333333333	0	mip1∆	143	Glycerol	17779.57940664863	15799.862941966541	4090.2544193414105
70.33333333333333	8	mip1∆	127	Glycerol	15300.64680842665	15952.788882164066	6911.354403173744
70.66666666666667	0	mip1∆	297	Glycerol	14903.852019044452	13272.559885014969	5083.215707109114
70.66666666666667	8	mip1∆	252	Glycerol	13576.554591283984	14147.884184224951	6307.593344848911
71	0	mip1∆	297	Glycerol	14904.84277251854	13273.431552213713	5085.42863649497
71	8	mip1∆	252	Glycerol	13581.795019478608	14153.368800218255	6317.913383962992
71.33333333333333	0	mip1∆	297	Glycerol	14911.336786899368	13279.14498378731	5084.076199656167
71.33333333333333	8	mip1∆	252	Glycerol	13590.319567899578	14162.290585898405	6329.049165638968
71.66666666666667	0	mip1∆	297	Glycerol	14915.04368820054	13282.406300793373	5084.213514476913
71.66666666666667	8	mip1∆	252	Glycerol	13595.2190653309	14167.418407031892	6336.253860869643
72	0	mip1∆	143	Glycerol	17800.559201858483	15818.281647360654	4082.0877548357225
72	8	mip1∆	127	Glycerol	15327.195326170067	15980.58895281829	6938.033354609609
