# Supplementary material for: Genetically controlled mtDNA deletions prevent ROS damage by arresting oxidative phosphorylation
Source: eLife. 2022 Jul 8;11:e76095. doi: 10.7554/eLife.76095 (PMC9427111; doi:10.7554/eLife.76095)
Supplement: Figure 6—figure supplement 1—source data 1. — Data are shown in Figure 6—figure supplement 1. [file elife-76095-fig6-figsupp1-data1.xlsx]

## Sheet: Data S4 - Selection relaxation
Generations of selection Gs	Ancestral batch cycle t	Batch Cycle tR	Population	N	Generation time Dnorm	SD Dnorm	SEM Dnorm	Generations of relaxation GR
6	1	1	A1	6	-0.583518226738	0.185670361967392	0.0757996078629944	6.99634892742561
6	1	5	A1	3	0.128470321561667	0.369922733892511	0.213574989992204	29.9345167480079
6	1	2	A1	6	-0.556293701202483	0.348136360387484	0.142126073976502	14.2611074871932
6	1	3	A1	3	-0.0157556572267333	0.187828978531557	0.108443111316807	20.0534833398259
6	1	4	A1	4	0.0172142353095	0.165481374583323	0.0827406872916617	25.80032620621
6	1	9	A1	4	0.02407014128845	0.199639769967473	0.0998198849837364	50.302337116368
6	1	6	A1	3	0.181739805545167	0.100317657330745	0.0579184264643781	34.7769013687048
6	1	7	A1	3	0.270523883016333	0.207483639078427	0.119790734874373	39.671357727471
6	1	8	A1	3	-0.0846534789624	0.418071774967231	0.241373851817915	44.8670604548679
6	1	10	A1	4	0.2727302640808	0.220738470699535	0.110369235349767	54.8002655014857
6	1	11	A1	4	0.099363374334875	0.238401130571801	0.1192005652859	60.1360564514197
6	1	0	A1	0	-0.583518226738	0	0	0
10	2	8	A1	4	0.02806693166863	0.0884968465301992	0.0442484232650996	44.5686741774799
10	2	9	A1	3	-0.0456477693493667	0.0598038602968433	0.0345277748409613	50.0828451160873
10	2	10	A1	4	0.188707942279925	0.170612640695754	0.085306320347877	55.2733911810967
10	2	11	A1	3	-0.10534282020044	0.197798979669403	0.114199294157563	60.3471839565181
10	2	1	A1	4	-0.7182407784075	0.149428049289145	0.0747140246445725	6.83008693104144
10	2	2	A1	3	-0.125528173125333	0.255428272232456	0.147471581732049	12.8412562793272
10	2	3	A1	3	0.0502487054003333	0.379844373619637	0.219303251359462	17.9964296121186
10	2	4	A1	3	-0.011049135046	0.229747949450196	0.132645040460835	23.2363418314511
10	2	5	A1	3	0.0040941141585	0.082569280768178	0.0476713964783014	28.4688200091468
10	2	6	A1	3	0.0953645718765	0.133536508384229	0.0770973390622776	33.5221397189655
10	2	7	A1	4	-0.1144737171499	0.113603264503148	0.0568016322515738	39.3619667964853
10	2	0	A1	0	-0.7182407784075	0	0	0
19	4	1	A1	3	-0.870229277334	0.237990817829093	0.137404062738286	6.24838344695681
19	4	2	A1	4	-0.2725931906425	0.0936116348456409	0.0468058174228205	13.6458126487834
19	4	3	A1	3	0.0709845429543667	0.17945189998254	0.103606602761509	19.7923011418555
19	4	4	A1	4	0.147259697863	0.309027669930532	0.154513834965266	25.1540094384148
19	4	5	A1	3	0.113422694205733	0.275826594447348	0.159248558553834	30.3117262893657
19	4	6	A1	3	0.265277570153333	0.329526565236774	0.190252251144584	35.0554885970729
19	4	7	A1	3	0.2798252488648	0.380817945079966	0.219865343104158	39.4181813608164
19	4	8	A1	3	0.0404011268193333	0.507453714901817	0.29297853889984	43.5745403930138
19	4	9	A1	4	0.30061156560725	0.224920995768316	0.112460497884158	48.1260602738736
19	4	10	A1	4	0.14828640266825	0.221278647693978	0.110639323846989	52.5944990130803
19	4	11	A1	4	0.260741055826267	0.203913230224486	0.101956615112243	56.8664425513869
19	4	0	A1	0	-0.870229277334	0	0	0
24	5	1	A1	3	-0.848544985477333	0.159906823031282	0.0923222473223682	5.79332878768128
24	5	2	A1	3	-0.626831670175333	0.221704037765602	0.128000885884397	12.5897862763593
24	5	3	A1	6	-0.26414217629965	0.189296271282715	0.0772798791423522	18.7500170078969
24	5	4	A1	3	-0.0661299347489667	0.141016885570317	0.0814161368443051	25.308288594447
24	5	5	A1	4	0.1795075381846	0.11427772932085	0.057138864660425	30.4377307336989
24	5	6	A1	3	0.201760645531133	0.354369426012133	0.204595283500678	35.7400108406147
24	5	7	A1	4	0.079215849384625	0.0712991399136689	0.0356495699568345	41.4442285836036
24	5	8	A1	3	0.161695008595633	0.0655969125550257	0.0378723951216525	47.2677256869226
24	5	9	A1	3	0.0177112623705	0.0731546507039523	0.0422358572763999	52.6156199672681
24	5	10	A1	2	0.15918588269795	0.27386265631069	0.19365014139105	57.8831786959711
24	5	11	A1	3	0.155415021377833	0.137877383033399	0.0796035442094941	62.8508768087531
24	5	0	A1	0	-0.848544985477333	0	0	0
242	50	1	A1	7	-0.533886032891105	0.33792985271842	0.127725478696803	7.64928121140167
242	50	2	A1	8	-0.261443887744573	0.337819928902654	0.119437381273512	14.5196298139819
242	50	3	A1	8	-0.367931457348703	0.312426833630927	0.110459566342535	21.3002303876191
242	50	4	A1	8	-0.219996794018632	0.321730902767777	0.113749051532182	27.7163181654525
242	50	5	A1	8	-0.520181714403512	0.342155227972063	0.120970140958738	34.9394663668849
242	50	6	A1	8	-0.414831723420597	0.277451735300771	0.0980940017415749	41.8104855769375
242	50	7	A1	8	-0.239484477193943	0.320774149022921	0.113410788001726	48.6447672981067
242	50	8	A1	8	-0.277754523560784	0.300735814055304	0.106326166732081	55.1821297416817
242	50	9	A1	8	-0.530644503858127	0.32818986358486	0.116032639028771	62.1839379979917
242	50	10	A1	8	-0.360534192715394	0.318567508255574	0.112630622676609	68.7099756535813
242	50	11	A1	7	-0.372855713686573	0.334562915611386	0.126452896087488	75.1050685148879
242	50	0	A1	0	-0.533886032891105	0	0	0
33	7	1	A1	4	-0.78730309831	0.0772401434992887	0.0386200717496444	6.88977325956367
33	7	2	A1	3	0.133029450139333	0.329680295916267	0.190341007593772	12.3896772837895
33	7	3	A1	4	0.18794642887065	0.187354463302774	0.0936772316513869	17.4584474679955
33	7	4	A1	3	-0.00593972544906666	0.124857300816888	0.0720863962369206	23.2447167451428
33	7	5	A1	4	0.204575466652325	0.132987561201173	0.0664937806005863	28.4288008032873
33	7	6	A1	3	-0.235219723726	0.374871819713653	0.216432346023282	34.2917909958132
33	7	7	A1	3	0.0501045347011	0.325291644846456	0.187807218717237	40.5439625810255
33	7	8	A1	3	0.109108107617167	0.0855264954283009	0.0493787451583748	45.2725841549508
33	7	9	A1	3	-0.167722745196	0.246653398206686	0.142405405851166	51.047172386521
33	7	10	A1	4	-0.0748055816465775	0.0592517806146586	0.0296258903073293	56.4703407127182
33	7	11	A1	3	-0.134453394711163	0.167346327591198	0.0966174472826735	62.3254958694507
33	7	0	A1	0	-0.78730309831	0	0	0
6	1	2	A10	6	0.24931256317535	0.163608960445181	0.0667930784063147	11.7622517493506
6	1	3	A10	3	0.275976836866333	0.0155724960417335	0.00899078478164921	17.0055547711845
6	1	4	A10	4	0.1415816325201	0.119028687580884	0.0595143437904419	22.8869150977359
6	1	5	A10	3	0.312695822436	0.092887679937431	0.0536287270162756	26.9021678023826
6	1	6	A10	3	0.213989185574667	0.0835826067708159	0.0482564405187012	31.0489032959078
6	1	7	A10	3	0.269198963138667	0.0147319009366445	0.00850546697144662	36.1798068587023
6	1	8	A10	3	0.147751942231	0.23336383588916	0.13473267346973	41.2928265244116
6	1	9	A10	4	0.159722967856563	0.117728593028783	0.0588642965143914	46.2800497354772
6	1	10	A10	4	0.239245891599675	0.135241089795123	0.0676205448975615	51.1371229532278
6	1	11	A10	4	0.124699130408103	0.17605082397326	0.0880254119866301	56.5752075824422
6	1	1	A10	6	-0.670981427960833	0.0578411678701538	0.0236135579014236	6.51377977810739
6	1	0	A10	0	-0.670981427960833	0	0	0
10	2	7	A10	4	0.13292894607525	0.249166651011819	0.124583325505909	34.1957205885519
10	2	8	A10	4	0.31094120680375	0.140021159525901	0.0700105797629507	38.9325871946072
10	2	1	A10	4	-0.32008438035865	0.195917603460868	0.097958801730434	6.23141163932383
10	2	2	A10	3	0.290020031301667	0.167609603157734	0.0967694495018841	11.3709893363803
10	2	3	A10	3	0.390439330083667	0.225802205558971	0.130366964163083	15.3629049356612
10	2	4	A10	3	0.362853530602667	0.0798052853830006	0.0460756029986303	19.7413883279743
10	2	5	A10	3	0.416382943937333	0.0200481438423693	0.0115748012441443	24.2962104752392
10	2	6	A10	3	0.262789837802	0.115742080199923	0.0668237211599928	29.2763403671999
10	2	9	A10	3	0.272834709904133	0.171485440972522	0.0990071655075875	43.8456043269376
10	2	10	A10	4	0.230745119447225	0.162172910217501	0.0810864551087503	48.8443764509258
10	2	11	A10	3	0.350161019919333	0.197634379826278	0.114104262393826	53.6931732845761
10	2	0	A10	0	-0.32008438035865	0	0	0
19	4	1	A10	3	-0.697599183521667	0.137281116834403	0.0792592897589948	6.18856988751038
19	4	2	A10	4	0.279591962433625	0.179575720457403	0.0897878602287013	12.2576318373716
19	4	3	A10	3	0.333176103505	0.0875219050932662	0.0505307954655861	18.0245392290296
19	4	4	A10	4	0.421484359536225	0.284230852362312	0.142115426181156	23.2218069297947
19	4	5	A10	3	0.304440012288633	0.242273098391374	0.139876438573664	28.2229160037528
19	4	6	A10	3	0.215687857118	0.128663383179035	0.0742838389132639	33.2952383075166
19	4	7	A10	3	0.286488074560667	0.0649085602841326	0.037474974752755	37.7284489015347
19	4	8	A10	3	0.252924907858	0.120233313457648	0.0694167358903337	41.9497009135931
19	4	9	A10	4	0.204772211221	0.0339974019863511	0.0169987009931755	46.6610188884848
19	4	10	A10	4	0.0654849974725	0.216897611108639	0.10844880555432	51.6716729771551
19	4	11	A10	4	0.3605439690365	0.0704725000001124	0.0352362500000562	56.2085314866825
19	4	0	A10	0	-0.697599183521667	0	0	0
24	5	1	A10	3	-0.672954196689667	0.204337298887123	0.117974194517961	6.02975360478346
24	5	2	A10	3	-0.0825834385957333	0.291756194139123	0.168445517223963	11.6608743542077
24	5	3	A10	6	0.0698517674912667	0.176193517020117	0.0719307021142785	17.2356305758972
24	5	4	A10	3	0.288870880909333	0.062972898544666	0.0363574199264139	23.2195156007769
24	5	5	A10	4	0.3008019786205	0.0810654275072285	0.0405327137536143	28.1122099603807
24	5	6	A10	3	0.176982398218567	0.148959706989383	0.0860019269287282	33.4819532123466
24	5	7	A10	4	0.21710011160285	0.144962320993732	0.0724811604968662	38.1578949535094
24	5	8	A10	3	0.270301209077967	0.27240998426942	0.157275977747891	43.0835491903202
24	5	9	A10	3	0.0524577243826667	0.419935760231317	0.242450024211901	47.5474705750154
24	5	10	A10	3	0.212316860583933	0.172203953701949	0.099421999025338	52.6074368973011
24	5	11	A10	3	0.221905359534333	0.123487778364774	0.0712957020805313	57.8111325882421
24	5	0	A10	0	-0.672954196689667	0	0	0
242	50	1	A10	8	-0.662828894388814	0.346385822782166	0.122465882098076	7.82120766587858
242	50	2	A10	8	-0.700227881929036	0.352398571653816	0.124591709848433	15.6985314631911
242	50	3	A10	8	-0.677441113220186	0.331916824337614	0.117350318639516	23.3479046917222
242	50	4	A10	8	-0.632576547044925	0.302596676200505	0.106984080852943	31.3034027331317
242	50	5	A10	8	-0.694401733144096	0.365479772914951	0.129216612907341	39.3958672564621
242	50	6	A10	8	-0.67658490745778	0.302575768204239	0.106976688759973	47.5221530072608
242	50	7	A10	8	-0.569533671473155	0.337887723295375	0.119461350210922	55.263924666312
242	50	8	A10	8	-0.65572199770954	0.328555184536075	0.116161799489728	63.2570381085004
242	50	9	A10	8	-0.722117233406879	0.3522806605241	0.124550021968734	71.223285339432
242	50	10	A10	8	-0.654305735269869	0.281454654229188	0.099509247300987	79.6936561755248
242	50	11	A10	8	-0.759750539738537	0.318684883737503	0.112672121176218	87.654314281703
242	50	0	A10	0	-0.662828894388814	0	0	0
33	7	1	A10	4	-0.66047304336925	0.101043113034489	0.0505215565172445	6.88741545602658
33	7	2	A10	3	0.0886396456866667	0.335709701283952	0.193822086405859	12.6886240203253
33	7	3	A10	4	0.2516047641225	0.0649134160875339	0.0324567080437669	18.5900484242207
33	7	4	A10	3	0.400881810536667	0.190572126447584	0.110026868504552	24.1642673080347
33	7	5	A10	4	0.39068304492525	0.233928325948389	0.116964162974194	29.1179180981067
33	7	6	A10	3	0.192699421771667	0.125329217800788	0.0723588576346103	34.7771524236044
33	7	7	A10	3	0.306024252785667	0.0303678616417154	0.0175328930935577	39.5089821495601
33	7	8	A10	3	-0.0627752429043334	0.538810533568124	0.311082406597763	43.820222983199
33	7	9	A10	3	0.203845752567333	0.164856698296181	0.0951800591390128	47.9680780259538
33	7	10	A10	4	0.1513596205088	0.134937429709507	0.0674687148547533	52.9005166399033
33	7	11	A10	3	0.285482368062333	0.143516623407903	0.0828593611577387	57.647185291652
33	7	0	A10	0	-0.66047304336925	0	0	0
6	1	1	A11	6	-0.788701074595333	0.171100298228987	0.0698514042498411	6.40386733413616
6	1	2	A11	6	0.0839966856283667	0.133611250067632	0.0545465644268504	11.6274886287796
6	1	3	A11	3	0.191053509087	0.111082622790058	0.0641335821701298	16.6173861331202
6	1	4	A11	4	0.117306749019375	0.134851812795587	0.0674259063977933	22.1428626595979
6	1	5	A11	3	0.1521702065809	0.186318970715983	0.107571307898007	25.9674255439496
6	1	6	A11	3	0.346676011866233	0.324274825711197	0.187220157915779	29.8826883719904
6	1	7	A11	3	0.214208730382167	0.122355183724385	0.0706417982600196	34.5477491036915
6	1	8	A11	3	0.160523978427	0.150937349981619	0.0871437196426564	39.5710270537903
6	1	9	A11	4	0.12852944267175	0.315769803789684	0.157884901894842	44.482481230308
6	1	10	A11	4	0.151470718628725	0.0560050732184875	0.0280025366092437	49.1555422417054
6	1	11	A11	4	0.0306261375354	0.107236988567364	0.0536184942836822	54.338781537546
6	1	0	A11	0	-0.788701074595333	0	0	0
10	2	1	A11	4	-0.4817920416055	0.169093708339058	0.084546854169529	5.922317188729
10	2	2	A11	3	0.062865576947	0.129150655635606	0.0745651657972335	10.8778179342114
10	2	3	A11	3	0.210995679531667	0.187342343669002	0.108162152547913	14.9124332182726
10	2	4	A11	3	0.314882803611	0.127149375798248	0.0734097263444113	18.9302955128486
10	2	5	A11	3	0.156605218391667	0.0289882105330365	0.0167363511545742	23.3005877642084
10	2	6	A11	3	0.1811829735046	0.228783236262818	0.132088063042412	28.0941639777761
10	2	7	A11	4	0.16622652917375	0.100344688899081	0.0501723444495404	32.8585067601235
10	2	8	A11	4	0.145164983019775	0.0623441616349165	0.0311720808174583	37.6534409679425
10	2	9	A11	3	0.241609352116767	0.304683008141876	0.175908816768217	42.3628947901108
10	2	10	A11	4	0.117796773625925	0.0240735784890583	0.0120367892445291	47.2390812575651
10	2	11	A11	3	0.281388405103167	0.187864195715038	0.10846344396717	51.8653729864651
10	2	0	A11	0	-0.4817920416055	0	0	0
19	4	1	A11	3	-0.912476597458667	0.193882389880579	0.11193804998868	5.98280246445858
19	4	2	A11	4	0.0806966469551	0.116414772202835	0.0582073861014173	11.879339561142
19	4	3	A11	3	0.0130309527997	0.214824378316747	0.124028912649668	17.8682046318894
19	4	4	A11	4	0.127572745549875	0.161509107232704	0.0807545536163521	23.7351108324687
19	4	5	A11	3	0.284625923015	0.0755197350936772	0.0436013393854638	28.1729507328116
19	4	6	A11	3	0.1196552664518	0.153900764451117	0.0888546477843415	33.6631555926253
19	4	7	A11	3	0.214920740983667	0.0519791416149328	0.0300101714036272	37.8028501845262
19	4	8	A11	3	0.1768393858086	0.132405019620389	0.0764440737198892	41.8865374660218
19	4	9	A11	4	0.1520332370076	0.0705341446761679	0.035267072338084	46.5021455685042
19	4	10	A11	4	0.07270678181325	0.179365653944314	0.0896828269721572	51.3310716049278
19	4	11	A11	4	0.21292899297135	0.161611247549739	0.0808056237748694	55.7146326060297
19	4	0	A11	0	-0.912476597458667	0	0	0
24	5	1	A11	3	-0.584275481426333	0.541075618431756	0.312390153953518	5.52050093641702
24	5	2	A11	3	0.071247957163	0.191484223192433	0.110553467805718	10.4301071737603
24	5	3	A11	6	0.00331341853560666	0.23244080889734	0.0948935628663764	15.9261406965248
24	5	4	A11	3	0.454092375828667	0.168884087211883	0.0975052732136249	20.973066465644
24	5	5	A11	4	0.23191386760875	0.14825552397772	0.0741277619888601	25.3603747242586
24	5	6	A11	3	0.1028330376875	0.159511548269039	0.0920940353319838	30.4771915279121
24	5	7	A11	4	0.226442672135625	0.165848922555762	0.0829244612778812	34.8346522906331
24	5	8	A11	3	0.175534488286833	0.203276731839754	0.117361875847669	39.6742972603788
24	5	9	A11	3	0.195446629171933	0.153982772712871	0.0889019952763409	43.8300721906333
24	5	10	A11	3	0.212359422448667	0.0352520774216673	0.0203527963888932	48.6927001367265
24	5	11	A11	3	0.307766539041	0.0774096333320062	0.044692472642104	53.4228714616052
24	5	0	A11	0	-0.584275481426333	0	0	0
242	50	1	A11	8	-0.779533014031362	0.263926239689823	0.0933120169088701	7.92356926985233
242	50	2	A11	8	-0.548596821970941	0.316169031693252	0.111782633155741	14.9864775291066
242	50	3	A11	8	-0.635431616794117	0.317449967408717	0.112235512321076	22.0418999600981
242	50	4	A11	8	-0.286415590166572	0.286317811627279	0.101228633088071	28.477610922313
242	50	5	A11	8	-0.557971702261499	0.319797573751568	0.113065516503369	35.7686665615123
242	50	6	A11	8	-0.430030331927556	0.26234177959655	0.0927518256706335	42.4575305101105
242	50	7	A11	8	-0.249106282376306	0.263734105004963	0.093244087039587	48.7793271352167
242	50	8	A11	8	-0.0767273889325329	0.329713207186694	0.116571222324238	55.0253653898206
242	50	9	A11	8	-0.586738115211546	0.295716276134879	0.104551492081103	61.9560989972865
242	50	10	A11	8	-0.141510449709382	0.215214261328151	0.0760897317965948	68.3792390974815
242	50	11	A11	8	-0.584511551559956	0.300042924139746	0.106081193153128	75.2235166740509
242	50	0	A11	0	-0.779533014031362	0	0	0
33	7	1	A11	4	-0.6389424155815	0.143695308359087	0.0718476541795437	6.0983427516325
33	7	2	A11	3	-0.462158263443667	0.217564903448865	0.125611155572417	11.251870572191
33	7	3	A11	4	-0.57340093699875	0.177378286379793	0.0886891431898965	17.2030210030131
33	7	4	A11	3	-0.736472606940333	0.28793369381768	0.166238595634401	22.6045812809094
33	7	5	A11	4	-0.30370443991125	0.111096811672637	0.0555484058363184	28.0829424801506
33	7	6	A11	3	-0.427170814752	0.167886600957307	0.0969293742560323	33.8012836188582
33	7	7	A11	3	-0.855727283466	0.258373585525071	0.149172059154389	39.1650477979134
33	7	8	A11	3	-0.648927897632	0.0998758829002996	0.0576633678780395	44.2531808557684
33	7	9	A11	3	-0.45676130512	0.158465017855118	0.0914898207157914	49.1933376194211
33	7	10	A11	4	-0.5752060294195	0.196143590577005	0.0980717952885023	54.7574055399751
33	7	11	A11	3	-0.778527314604667	0.190222097532937	0.109824779216456	60.2783218533259
33	7	0	A11	0	-0.6389424155815	0	0	0
6	1	1	A12	6	-0.181494135922533	0.18704764655774	0.0763618819424861	5.7251784156807
6	1	2	A12	6	0.0987052210072067	0.192516983085052	0.078594729229733	10.9337389930632
6	1	3	A12	3	0.0522398949301	0.168925608422507	0.0975292454957557	15.5572064516907
6	1	4	A12	4	0.00734477895405	0.136628455013375	0.0683142275066874	21.3437390687766
6	1	5	A12	3	0.157320148983073	0.180176347591881	0.104024862783776	25.081056717439
6	1	6	A12	3	0.297192620264	0.146562558897297	0.0846179328324749	29.391704240999
6	1	7	A12	3	0.09644721596737	0.109893805447693	0.0634472181574979	33.9794430114441
6	1	8	A12	3	0.180402848460967	0.0875920789625806	0.0505713103679249	38.4772934348452
6	1	9	A12	4	0.0021547853457	0.130508107877528	0.0652540539387642	43.3518159251433
6	1	10	A12	4	0.18168928584085	0.175752509892488	0.0878762549462439	47.6792645148854
6	1	11	A12	4	0.091028904823075	0.0500470892081437	0.0250235446040718	52.5293399621204
6	1	0	A12	0	-0.181494135922533	0	0	0
10	2	11	A12	3	-0.511978269923333	0.182628020529036	0.105440336814007	65.1161898767943
10	2	1	A12	4	-0.40024730413575	0.128564426632815	0.0642822133164073	6.29785077130097
10	2	2	A12	3	-0.430470765531333	0.101636774825972	0.0586800193053402	11.9256415711376
10	2	3	A12	3	-0.45663382359	0.223837191501153	0.12923246276784	17.3851361812965
10	2	4	A12	3	-0.711848814117667	0.0264594572416997	0.0152763747611067	23.8412350594054
10	2	5	A12	3	-0.622700878508	0.166055859478993	0.0958723951707112	29.9444722429068
10	2	6	A12	3	-0.38073292449	0.139529332291423	0.0805572975583015	35.9023092737557
10	2	7	A12	4	-0.52838815599225	0.0726586071408584	0.0363293035704292	42.0344576788256
10	2	8	A12	4	-0.490014831364	0.15960840965537	0.0798042048276851	47.6161580217401
10	2	9	A12	3	-0.442843147982	0.146848487747475	0.0847830139310939	53.3599703438149
10	2	10	A12	4	-0.7288568764745	0.244964589505185	0.122482294752592	59.3203949725364
10	2	0	A12	0	-0.40024730413575	0	0	0
19	4	1	A12	3	-0.592137048613667	0.123698807490904	0.0714175398033091	6.10336813252742
19	4	2	A12	4	-0.6354577718415	0.118444127016668	0.0592220635083342	12.9630938266502
19	4	3	A12	3	-0.447801245956667	0.0963214857419207	0.0556112357218426	19.7536536470391
19	4	4	A12	4	-0.4422245456895	0.145027423629083	0.0725137118145413	27.4745824358855
19	4	5	A12	3	-0.693368685122667	0.10216987143053	0.0589878027734857	34.0021443165841
19	4	6	A12	3	-0.674418364798667	0.0890722999870835	0.0514259163748818	41.5484150548883
19	4	7	A12	3	-0.659883217318333	0.183220084866188	0.10578216531844	47.9677629321963
19	4	8	A12	3	-0.502158037854333	0.237010584793195	0.136838124931142	53.9525428736376
19	4	9	A12	4	-0.45092739739525	0.104879306735329	0.0524396533676645	60.3192592145803
19	4	10	A12	4	-0.6638034193085	0.136841094419157	0.0684205472095785	67.3266175054581
19	4	11	A12	4	-0.5246151850975	0.145922688222178	0.0729613441110888	73.7149831121388
19	4	0	A12	0	-0.592137048613667	0	0	0
24	5	1	A12	3	-0.517319919765333	0.25029851868576	0.144509917140988	5.57333706914025
24	5	2	A12	3	-0.648173914883	0.135944309006496	0.078487483399698	12.2366231832725
24	5	3	A12	6	-0.53599225408	0.132686278108214	0.0541689462056912	18.9412262464341
24	5	4	A12	3	-0.516832277266667	0.0597406506672312	0.0344912807442893	26.5733007729758
24	5	5	A12	4	-0.44842819317675	0.150463584705895	0.0752317923529474	33.7690318183026
24	5	6	A12	3	-0.679738334229333	0.137320983019427	0.07928230651165	40.3296990006932
24	5	7	A12	4	-0.54224746545025	0.0781945751325187	0.0390972875662593	47.3205903867798
24	5	8	A12	3	-0.461989003954	0.0504486124873791	0.0291265199998314	54.1041944773362
24	5	9	A12	3	-0.424936622635667	0.293877988886335	0.169670535992431	59.9452814698432
24	5	10	A12	3	-0.481183983918333	0.128904967709079	0.074423317806717	66.7482498874384
24	5	11	A12	3	-0.496036918019667	0.0432971525057005	0.0249976226543105	73.5424383484347
24	5	0	A12	0	-0.517319919765333	0	0	0
242	50	1	A12	8	-0.7302645255576	0.201360308751636	0.0711916198900495	8.59761884821414
242	50	2	A12	8	-0.644553527606676	0.12237795518277	0.04326714098874	16.650436339277
242	50	3	A12	8	-0.590443595982487	0.188537382711466	0.0666580309112205	24.4619263137065
242	50	4	A12	8	-0.519790273954312	0.209323425080114	0.0740070066676713	32.3311318829562
242	50	5	A12	8	-0.678697409875043	0.183897540805049	0.0650175990733901	40.5754488002565
242	50	6	A12	8	-0.699648662635983	0.169423302881096	0.0599001831791225	48.8076085416757
242	50	7	A12	8	-0.638403900654737	0.145023154499535	0.0512734279878427	56.8448946779395
242	50	8	A12	8	-0.540533866910711	0.146320534857379	0.0517321212122478	64.5040967353957
242	50	9	A12	8	-0.678732248318576	0.142114228788135	0.0502449674395932	72.6746277507646
242	50	10	A12	8	-0.43401059776877	0.171911981525069	0.0607800639517963	79.7003577525383
242	50	11	A12	8	-0.659662881597658	0.132652263044207	0.0468996573691504	87.7302506796282
242	50	0	A12	0	-0.7302645255576	0	0	0
33	7	1	A12	4	-0.5409817540545	0.0631465404232874	0.0315732702116437	6.58203138829907
33	7	2	A12	3	-0.651002504964333	0.245471847539242	0.141723237255256	13.106634780479
33	7	3	A12	4	-0.44108920613575	0.167573661266584	0.0837868306332918	19.7469781890211
33	7	4	A12	3	-0.602729246098333	0.194310961265662	0.112185485793225	26.387552085852
33	7	5	A12	3	-0.460474385075667	0.182058666644403	0.10511162019545	33.2433087243029
33	7	6	A12	3	-0.589357254225	0.0400408001179019	0.0231175667266386	41.2604587263355
33	7	7	A12	3	-0.507698115828	0.28003791099679	0.161679963297297	47.8312452954959
33	7	8	A12	3	-0.541332157450333	0.235876869138616	0.136183573892786	53.7026576382277
33	7	9	A12	3	-0.607430650557333	0.152397097093464	0.0879865050306291	59.4005927648632
33	7	10	A12	4	-0.2810587592903	0.181676307952183	0.0908381539760914	65.8740647305194
33	7	11	A12	3	-0.580646192448333	0.114314563086995	0.065999543770571	71.9952896180702
33	7	0	A12	0	-0.5409817540545	0	0	0
6	1	1	A2	6	-0.7557821766215	0.152007195386475	0.0620566776547349	6.28078445751457
6	1	2	A2	6	0.0744117795908767	0.292804581596802	0.119536969876881	11.5268863856327
6	1	3	A2	3	0.03243649573601	0.236655969821267	0.13663338788164	16.984046423479
6	1	4	A2	4	-0.135738413983425	0.183539081244777	0.0917695406223886	22.6685306554811
6	1	5	A2	3	0.0243066092257	0.189007624845022	0.109123603083165	26.7721437289539
6	1	6	A2	3	0.295326610255667	0.15539937203434	0.0897198692759251	31.2692643745814
6	1	7	A2	3	0.2395253177372	0.262699291374003	0.151669506590704	36.1667524264599
6	1	8	A2	3	0.309032706392	0.249644827828884	0.144132508548804	40.7987251368623
6	1	9	A2	4	0.38108717977175	0.154606771257277	0.0773033856286383	45.461157228496
6	1	10	A2	4	0.47957304812175	0.302915686872294	0.151457843436147	49.7330203405323
6	1	11	A2	4	0.31663990282725	0.144219389406699	0.0721096947033497	54.3392264212359
6	1	0	A2	0	-0.7557821766215	0	0	0
10	2	1	A2	4	-0.57411644023475	0.0993478713895873	0.0496739356947937	5.90239273851165
10	2	2	A2	3	-0.0151139009779333	0.19229880530715	0.111023767008926	11.0524444954007
10	2	3	A2	3	-0.104577713024233	0.048911913193734	0.0282393062489819	16.0933139384461
10	2	4	A2	3	0.212106109586333	0.0681630062254368	0.0393539299930301	20.7127528653721
10	2	5	A2	3	-0.1561789154014	0.0725449158053262	0.0418838266685438	26.771414927958
10	2	6	A2	3	-0.0986727229792333	0.0692366706906283	0.0399738104610277	31.9469636066763
10	2	7	A2	4	0.3239193565165	0.166521127697467	0.0832605638487334	36.6615323711097
10	2	8	A2	4	0.26728360385425	0.109106253389503	0.0545531266947517	41.2097760049469
10	2	9	A2	3	0.102280910821867	0.0794485515398395	0.0458696426182522	45.863196647441
10	2	10	A2	4	0.176932146289	0.0818785668601467	0.0409392834300733	50.826497551512
10	2	11	A2	3	0.0473918552026	0.127497161528788	0.0736105205295589	55.3578688660325
10	2	0	A2	0	-0.57411644023475	0	0	0
19	4	1	A2	3	-0.821236160955	0.256673815377177	0.148190696401942	6.18447614226922
19	4	2	A2	4	0.2459494363195	0.123292761710601	0.0616463808553006	11.478760258613
19	4	3	A2	3	0.187470797976964	0.173552556180913	0.100200615029598	16.9146207660528
19	4	4	A2	4	0.1799777038197	0.190916256159287	0.0954581280796437	22.3015429292839
19	4	5	A2	3	0.10631630039675	0.109891777803126	0.0634460474963616	26.9573804535852
19	4	6	A2	3	-0.00651414862816333	0.0255825122754715	0.0147700703487904	31.7989587731367
19	4	7	A2	3	0.198209132225	0.0390818801095125	0.0225639340016637	36.6410196652462
19	4	8	A2	3	0.14608409658	0.0625313388312941	0.0361024853070354	41.4296079164945
19	4	9	A2	4	0.125690988763	0.29101455616449	0.145507278082245	45.9507088750313
19	4	10	A2	4	0.231802975510725	0.22208832330377	0.111044161651885	50.7719349068528
19	4	11	A2	4	0.217635440366	0.26485129995789	0.132425649978945	55.4340511503189
19	4	0	A2	0	-0.821236160955	0	0	0
24	5	1	A2	3	-0.737078781176667	0.62964880424985	0.363527906628577	5.68219686823811
24	5	2	A2	3	-0.299997276799333	0.0444268112855091	0.0256498314549254	11.3530267211005
24	5	3	A2	6	-0.676900671923333	0.200595629622578	0.0818928228679397	17.1634648787116
24	5	4	A2	3	-0.487445482755667	0.099781936436779	0.0576091278620365	23.3344941061177
24	5	5	A2	4	0.28875991258825	0.390018155094486	0.195009077547243	28.6227255492089
24	5	6	A2	3	0.074276286678	0.125451109606006	0.0724292319011646	34.0179316147641
24	5	7	A2	4	0.006659014025245	0.058509188736471	0.0292545943682355	39.538735440717
24	5	8	A2	3	0.1438617825553	0.189541910856449	0.109432073255687	44.2284262505401
24	5	9	A2	3	0.178270954743333	0.105276938112934	0.060781668558962	48.6048117122955
24	5	10	A2	3	-0.048177733455	0.413509307607011	0.238739710059324	54.1833387591208
24	5	11	A2	3	0.2477242081716	0.197436703975126	0.113990134187952	58.9405349401911
24	5	0	A2	0	-0.737078781176667	0	0	0
242	50	1	A2	7	-0.996549087627424	0.265421433874979	0.10031987237991	10.615603942331
242	50	2	A2	8	-1.0677364223696	0.404382342303629	0.142970748217498	19.3516144374253
242	50	3	A2	8	-0.920350551829856	0.368702979978239	0.13035618869315	27.1414366665911
242	50	4	A2	8	-0.809577229861516	0.34056940885233	0.120409469232088	35.022717878845
242	50	5	A2	8	-1.04972480562085	0.332083747862597	0.117409335017743	43.4720892435879
242	50	6	A2	8	-0.851973867128044	0.338207909008849	0.11957455295554	51.5457163134412
242	50	7	A2	8	-0.801015306030083	0.329245410764595	0.116405831313098	59.3315597009448
242	50	8	A2	8	-0.871418856026747	0.38606844435419	0.136495807502494	67.5125619361901
242	50	9	A2	8	-1.08021556352747	0.411120858088098	0.145353173320663	75.8458658506324
242	50	10	A2	8	-0.823321415984726	0.304705008257527	0.1077294888002	83.9833569656474
242	50	11	A2	8	-0.97180419245136	0.337508463953741	0.119327261784773	92.1075436559887
242	50	0	A2	0	-0.996549087627424	0	0	0
33	7	1	A2	4	-0.7332232109905	0.145566084171767	0.0727830420858837	6.22997026394615
33	7	2	A2	3	-0.2716345367994	0.217524996257584	0.125588115144788	11.3718454861744
33	7	3	A2	4	0.041809792000625	0.209720181457918	0.104860090728959	17.327846667614
33	7	4	A2	3	0.0968469222144667	0.281438653193402	0.162488682181577	22.8222774608283
33	7	5	A2	4	-0.0092463647631	0.201986678603428	0.100993339301714	28.2229389287716
33	7	6	A2	3	0.116956168968433	0.175993531834372	0.101609912980208	33.7236530878028
33	7	7	A2	3	-0.136841435368067	0.0619701036206792	0.0357784560071081	39.6786665129703
33	7	8	A2	3	0.186375165702294	0.160982151582002	0.0929430885505942	43.9389274462738
33	7	9	A2	3	0.118154499911533	0.134124224009598	0.077436656836791	48.1293273004491
33	7	10	A2	4	0.299940083926625	0.229363328039972	0.114681664019986	53.2001834435118
33	7	11	A2	3	0.222902348377333	0.0998072641024219	0.0576237507966134	57.7167430166807
33	7	0	A2	0	-0.7332232109905	0	0	0
6	1	1	A3	6	-0.724196341411167	0.112766108542931	0.0460365710349138	6.38277724707449
6	1	2	A3	6	0.0220838156247667	0.213659065348789	0.08722594817075	11.9335543258683
6	1	3	A3	2	0.2468019368573	0.231095076187071	0.1634088954707	16.7796840582798
6	1	4	A3	3	0.254746091141567	0.225515831411952	0.130201625972213	22.3813872011562
6	1	5	A3	3	0.195788787156433	0.173477322754926	0.100157178990852	26.6033141388803
6	1	6	A3	3	0.1748572718123	0.185365221747461	0.107020660674291	31.0490839005936
6	1	7	A3	3	0.139084225383667	0.148096478968057	0.0855035419982436	36.0445733446953
6	1	8	A3	3	-0.0307875063016667	0.18697945653937	0.107952639565935	41.2243067659092
6	1	9	A3	4	0.31473964291425	0.259320748255886	0.129660374127943	46.4017124192913
6	1	10	A3	4	0.35809033743725	0.239580899182921	0.119790449591461	50.8860846185768
6	1	11	A3	4	0.25828742968615	0.116969588001791	0.0584847940008957	56.0287886702013
6	1	0	A3	0	-0.724196341411167	0	0	0
10	2	1	A3	4	-0.4529190246925	0.210252648758602	0.105126324379301	6.13739384037261
10	2	2	A3	3	0.2288809612707	0.14277956063599	0.0824338177679655	11.2843608560208
10	2	3	A3	3	0.2567868670308	0.223300694729402	0.128922716212251	15.7461275086798
10	2	4	A3	3	0.178465973034	0.246147070261537	0.142113077275736	20.6141898038912
10	2	5	A3	3	0.2383422374296	0.174868699148881	0.100960490526446	25.5815679792764
10	2	6	A3	3	0.2092089299276	0.164569999671528	0.0950145336108935	30.2540596920688
10	2	7	A3	4	0.172314739004175	0.222696268543537	0.111348134271769	35.1610433873762
10	2	8	A3	3	0.146623446901	0.382595412083199	0.220891564156951	39.7350300298574
10	2	9	A3	3	-0.0967467082736667	0.200214442365579	0.115593862195418	44.6384708500536
10	2	10	A3	4	0.258248358711375	0.165813792809491	0.0829068964047454	49.9097719743818
10	2	11	A3	3	0.410313006632667	0.0708014251840805	0.040877221889038	54.2011976099084
10	2	0	A3	0	-0.4529190246925	0	0	0
19	4	1	A3	3	-0.468230600632333	0.249895585003349	0.144277283270983	6.17282121304306
19	4	2	A3	4	0.1986411047495	0.233698921470272	0.116849460735136	11.9456828912724
19	4	3	A3	3	0.0235445973837	0.199016370934238	0.114902155332025	17.2686767152716
19	4	4	A3	4	0.273782933707275	0.224563429388261	0.11228171469413	22.5627330470256
19	4	5	A3	3	0.251734611571333	0.11785232013193	0.0680420687527918	27.2507861708855
19	4	6	A3	3	0.1852091818023	0.19372537374064	0.111847396678019	31.8700708807504
19	4	7	A3	2	0.318432704422	0.0805822080427307	0.05698022575	36.6828391814072
19	4	8	A3	3	0.296676284345667	0.217673047463623	0.125673592548449	40.9818561544127
19	4	9	A3	4	0.1858025486939	0.227335735301778	0.113667867650889	46.1185512053748
19	4	10	A3	4	0.19856840557355	0.181129682222887	0.0905648411114435	51.0129044716034
19	4	11	A3	4	0.255962146283475	0.182467497963709	0.0912337489818545	55.7963207504242
19	4	0	A3	0	-0.468230600632333	0	0	0
24	5	1	A3	3	-0.2533350777854	0.205404425262723	0.118590300218173	5.3967290366594
24	5	2	A3	3	0.1490483326185	0.205642961599889	0.118728019236648	10.4614160620291
24	5	3	A3	6	-0.150892776135333	0.249673491730346	0.101928776173057	16.4633673056138
24	5	4	A3	3	0.0905784954439333	0.117003771007389	0.0675521586873171	22.1656299734385
24	5	5	A3	4	0.36354304704275	0.144960063301946	0.0724800316509732	26.8120856733092
24	5	6	A3	3	0.103207029258233	0.0704234332176944	0.0406589881254935	31.7691768020765
24	5	7	A3	4	0.264644451616455	0.257882804192978	0.128941402096489	36.6927396321893
24	5	8	A3	3	0.0418904832446667	0.158312428899744	0.0914017234413304	41.3857004731372
24	5	9	A3	3	0.256467962919667	0.177714712486391	0.102603637092975	45.7096197045629
24	5	10	A3	3	0.0788125272641667	0.0970442795005679	0.0560285408929662	51.1982605119687
24	5	11	A3	3	0.0693298245020333	0.0982143473954959	0.056704079907073	56.6033958863173
24	5	0	A3	0	-0.2533350777854	0	0	0
242	50	1	A3	8	-1.07774718147388	0.429816656343525	0.151963136183717	9.02359706017474
242	50	2	A3	8	-0.715329285644262	0.377995399745521	0.133641555208689	16.5886451798192
242	50	3	A3	8	-0.805502523945188	0.324179934291798	0.11461491493117	23.7319082644827
242	50	4	A3	7	-0.63699757981667	0.315859220462164	0.119383563807087	31.1914716692149
242	50	5	A3	8	-0.808692511375905	0.343021549080985	0.121276431724139	38.4750814217008
242	50	6	A3	8	-0.71052413209316	0.390628829423792	0.138108147106263	45.8540173097819
242	50	7	A3	8	-0.717838022507249	0.197810423252632	0.0699365458356586	53.3140888045881
242	50	8	A3	8	-0.653398466959082	0.343366113656444	0.121398253698071	60.7578195935729
242	50	9	A3	8	-0.785410465867407	0.364808388241101	0.128979242579508	67.7347240602433
242	50	10	A3	8	-0.672552092010093	0.318346144791035	0.112552358873168	75.0256394516907
242	50	11	A3	8	-0.69217944874464	0.371893696411367	0.131484277306504	82.0498809063909
242	50	0	A3	0	-1.07774718147388	0	0	0
33	7	1	A3	4	-0.52750382373775	0.181610923584522	0.0908054617922609	6.47323390806113
33	7	2	A3	3	0.306395388106667	0.307536135147528	0.177556070412962	11.3190967776308
33	7	3	A3	4	0.282082866567775	0.159206028349974	0.0796030141749871	16.7111796235629
33	7	4	A3	3	0.0818903659792	0.172865692146643	0.0998040538945152	22.3093592698462
33	7	5	A3	4	0.25037085845675	0.129518050243917	0.0647590251219585	27.3918809104716
33	7	6	A3	3	-0.0844541763245333	0.27132507251491	0.156649603654378	32.9923767234574
33	7	7	A3	3	0.262056953989333	0.0602131801070776	0.0347640957435847	38.139522964098
33	7	8	A3	3	0.26507864304	0.133497217690323	0.0770746545695741	42.2602394406569
33	7	9	A3	3	0.114837192736	0.245559927517937	0.141774090254666	46.4578009120861
33	7	10	A3	4	0.2716599607445	0.0682329888974197	0.0341164944487099	51.3661784448833
33	7	11	A3	3	0.245727635224667	0.151349980786253	0.0873819521487881	55.8790893370147
33	7	0	A3	0	-0.52750382373775	0	0	0
6	1	1	A4	6	-0.646729879131167	0.293284891343339	0.119733055509798	6.54865458677851
6	1	2	A4	6	0.218269322654	0.250980214735159	0.102462243605882	11.7772246536409
6	1	3	A4	3	0.359949999572	0.14430733770218	0.0833158802683918	16.8511100657261
6	1	4	A4	4	0.271285853748275	0.14462773031113	0.0723138651555648	22.1526155240986
6	1	5	A4	3	0.146372259361	0.255712776709666	0.147635840468552	26.5965458991887
6	1	6	A4	3	0.1437436943413	0.148350468782058	0.0856501830857283	31.2266741323425
6	1	7	A4	3	0.259766570462867	0.173933412336895	0.100420502433776	36.2776936793275
6	1	8	A4	3	0.1056777591609	0.24541135189995	0.141688310081626	41.3260031763285
6	1	9	A4	4	0.13349744250965	0.181034122690282	0.090517061345141	46.5226904677145
6	1	10	A4	4	0.27336805582945	0.127714543784319	0.0638572718921594	51.2153829556217
6	1	11	A4	4	0.314969264050475	0.185528006690907	0.0927640033454536	56.2896422564094
6	1	0	A4	0	-0.646729879131167	0	0	0
10	2	1	A4	4	-0.364489317535	0.211347115460794	0.105673557730397	6.42483959002448
10	2	2	A4	3	0.310101227883	0.124466692317794	0.0718608783148206	11.4327295548366
10	2	3	A4	3	0.4354855174829	0.312138286947386	0.180213123993462	15.5502123740998
10	2	4	A4	3	0.300622752739333	0.0542805860481137	0.0313389109666491	20.3415237940215
10	2	5	A4	3	0.347699927053333	0.132701801144368	0.0766154206126491	25.1375016758771
10	2	6	A4	3	0.690513267138	0.121573317280192	0.0701903874579948	29.4391582980745
10	2	7	A4	4	0.6672972047555	0.215816822703827	0.107908411351914	33.8968726235226
10	2	8	A4	4	0.68565875014675	0.192385199046978	0.0961925995234888	38.1411085560478
10	2	9	A4	3	0.69554038874	0.0815073631170384	0.0470582980365587	42.477071914914
10	2	10	A4	4	0.5665564797495	0.136042705217324	0.0680213526086622	47.0114282302088
10	2	11	A4	3	0.713603078655667	0.0903962869724871	0.0521903206173081	51.2653864901119
10	2	0	A4	0	-0.364489317535	0	0	0
19	4	1	A4	3	-0.44615350903	0.340659524712317	0.196679868294666	6.60014594418131
19	4	2	A4	4	0.4963861818285	0.18574436915601	0.0928721845780051	12.13355145603
19	4	3	A4	3	0.265116504357667	0.131148349596179	0.075718534943129	17.4024458623743
19	4	4	A4	4	0.43980810134875	0.233416859618542	0.116708429809271	22.5544875258386
19	4	5	A4	3	0.2232640373117	0.233785983219558	0.134976400344573	27.4692966768546
19	4	6	A4	3	0.317562456156633	0.215858293175082	0.124625843671446	32.069310192497
19	4	7	A4	3	0.285175237787333	0.108182168656673	0.0624590041954476	37.0295677162247
19	4	8	A4	3	0.282263935177	0.246431562682324	0.14227732905146	41.4525129789285
19	4	9	A4	4	0.15915538999825	0.203862393977141	0.101931196988571	46.6772631721387
19	4	10	A4	4	0.33537010748175	0.0981438546044114	0.0490719273022057	51.6012725196332
19	4	11	A4	4	0.331511550060975	0.179016641147135	0.0895083205735676	56.3948256832647
19	4	0	A4	0	-0.44615350903	0	0	0
24	5	1	A4	3	-0.460652474460667	0.177509563047564	0.102485194009244	5.69980263419091
24	5	2	A4	3	0.116578849075667	0.245454823481297	0.141713408410819	10.9934751041783
24	5	3	A4	6	0.189958484721217	0.173225183043368	0.0707188848427447	16.0258087458943
24	5	4	A4	3	0.194159418644033	0.17096481922947	0.0987065844040903	21.6339385696912
24	5	5	A4	4	0.29453910851975	0.129422146787837	0.0647110733939184	26.5743388135346
24	5	6	A4	3	0.2620659259236	0.157894153562202	0.0911602320626056	31.7987392853388
24	5	7	A4	4	0.3129037548901	0.238089164499568	0.119044582249784	36.8073396113176
24	5	8	A4	3	0.270103982122333	0.0941662493332672	0.0543669094011393	41.49821620817
24	5	9	A4	3	0.211316988205433	0.211564185102812	0.122146639219992	45.9869391049699
24	5	10	A4	3	0.356624655999667	0.309806723354729	0.178866995125609	51.4215159225177
24	5	11	A4	3	0.166595277489667	0.0415415958139628	0.0239840515257581	56.8300603617348
24	5	0	A4	0	-0.460652474460667	0	0	0
242	50	1	A4	8	-0.457978293307526	0.367712559590351	0.1300060222069	7.12963668720672
242	50	2	A4	8	-0.389561326216222	0.347384027274412	0.122818800680815	13.9518347324551
242	50	3	A4	8	-0.4663042761145	0.370622657130587	0.131034897059207	20.5524372788099
242	50	4	A4	8	-0.285960294099183	0.29469318517597	0.104189774803696	26.9062199430554
242	50	5	A4	8	-0.404912061165935	0.356595830026168	0.126075664777174	33.6152488491865
242	50	6	A4	8	-0.359914466878092	0.286339822814175	0.101236415217829	40.1473189816229
242	50	7	A4	8	-0.259379881246791	0.359122300169662	0.12696890686264	46.710395372187
242	50	8	A4	8	-0.306163820486827	0.320016600268913	0.113142954071207	53.1960464649351
242	50	9	A4	8	-0.402949892503749	0.396098249799981	0.140041879224845	59.8100024759307
242	50	10	A4	8	-0.295641375867186	0.304316577081142	0.107592157640777	66.3903497814598
242	50	11	A4	8	-0.4132531645334	0.386666187799496	0.136707141724287	72.9829080513153
242	50	0	A4	0	-0.457978293307526	0	0	0
33	7	1	A4	4	-0.560973584931	0.138487544966355	0.0692437724831775	6.50074323974959
33	7	2	A4	3	0.310010491786667	0.390850874856186	0.22565785781122	11.4959601241357
33	7	3	A4	4	0.262603057500525	0.217966034639635	0.108983017319818	17.1587984520038
33	7	4	A4	3	0.323874656371333	0.167474716686556	0.0966915727614391	22.3995378383293
33	7	5	A4	4	0.33899644852675	0.229986914675693	0.114993457337847	27.5696352904296
33	7	6	A4	3	0.186929186303467	0.128595062478137	0.0742443939382094	32.9765510808578
33	7	7	A4	3	0.285461326288667	0.178667558932381	0.103153763245063	38.1025155761908
33	7	8	A4	3	0.353758900108667	0.197811871207408	0.114206737090501	42.3955817373732
33	7	9	A4	3	0.2876666157138	0.174237008833694	0.100595783952928	46.6031792786102
33	7	10	A4	4	0.091248983102	0.154015312315879	0.0770076561579396	51.7851926198508
33	7	11	A4	3	0.2316625993973	0.294968909378974	0.170300379232521	56.6587040281686
33	7	0	A4	0	-0.560973584931	0	0	0
6	1	1	A5	6	-0.719768148798333	0.152711742152838	0.0623443076676546	6.57997903136981
6	1	2	A5	6	0.242350048954867	0.256810816993452	0.104842577010205	11.9193965939263
6	1	3	A5	3	0.394609596812	0.114347090875322	0.0660183236979179	16.790697354107
6	1	4	A5	4	0.154382840743925	0.141049605410987	0.0705248027054935	22.1199617611579
6	1	5	A5	3	0.0966020399197733	0.0943925758188367	0.0544975790585076	26.3477975600036
6	1	6	A5	3	0.164768755630033	0.143465567601009	0.0828298840738853	30.8534685207424
6	1	7	A5	3	0.279224239981	0.126564533349477	0.07307206739918	36.0145591973361
6	1	8	A5	3	0.162983407754033	0.162966543142225	0.0940887775520661	41.2925207813903
6	1	9	A5	4	0.18606187677765	0.178961953151567	0.0894809765757835	46.6408314937838
6	1	10	A5	4	0.106023232712525	0.175302855004703	0.0876514275023517	51.6660955638419
6	1	11	A5	4	0.16996862688275	0.161661531940834	0.080830765970417	56.9382265033549
6	1	0	A5	0	-0.719768148798333	0	0	0
10	2	1	A5	4	-0.53059853850275	0.157437948985721	0.0787189744928603	6.26461680701992
10	2	2	A5	3	0.208292567426533	0.240028680033474	0.138580623030557	11.7967208876872
10	2	3	A5	3	0.119423797232967	0.0931748622469548	0.0537945317999857	16.3507929765628
10	2	4	A5	3	0.326117645220667	0.124838549054862	0.0720755699020666	20.8961993355701
10	2	5	A5	3	0.428430691631333	0.120317241113719	0.069465191545159	25.6322908506338
10	2	6	A5	3	0.292550999118167	0.189554800810596	0.109439515274184	30.5829396858399
10	2	7	A5	4	0.25854875081765	0.134930173972867	0.0674650869864333	35.5478006596246
10	2	8	A5	4	0.256491298171475	0.14918107444891	0.0745905372244552	40.2950824458048
10	2	9	A5	3	0.223018298732667	0.292026666555446	0.168601674546336	45.3546037511959
10	2	10	A5	4	0.14927841991875	0.22298359690251	0.111491798451255	50.3673429391651
10	2	11	A5	3	0.170450122733	0.287028233635651	0.165715827954566	55.2360895746363
10	2	0	A5	0	-0.53059853850275	0	0	0
19	4	1	A5	3	-0.737025537504	0.15981384984935	0.0922685692307529	6.52972535362334
19	4	2	A5	4	0.408075779973	0.187137695268807	0.0935688476344035	12.1381253734289
19	4	3	A5	3	0.324146872569333	0.198500131569718	0.114604104395953	17.5237540086577
19	4	4	A5	4	0.352990411069075	0.186718790547469	0.0933593952737343	22.7121466094397
19	4	5	A5	3	0.396874566678	0.129724123702893	0.0748962577402535	27.4167047809979
19	4	6	A5	3	0.252101037477	0.0724310522365955	0.0418180875064863	31.8913860625817
19	4	7	A5	3	0.385807898182333	0.0693560221778231	0.0400427180742878	36.6381899532122
19	4	8	A5	3	0.09557550903021	0.0924039051704296	0.0533494195243202	41.1260420532891
19	4	9	A5	4	0.15473110101025	0.19177870706836	0.0958893535341801	46.2749366214801
19	4	10	A5	4	0.126647631306225	0.155520753132941	0.0777603765664705	51.6122434775609
19	4	11	A5	4	0.26989436690175	0.0700863734013907	0.0350431867006954	56.4943268565769
19	4	0	A5	0	-0.737025537504	0	0	0
24	5	1	A5	3	-0.417664192126333	0.155320742238776	0.0896744723422899	5.56290651219273
24	5	2	A5	3	0.105433758467267	0.176390020784849	0.101838825982496	10.7109296975496
24	5	3	A5	6	-0.140391315318	0.410558653021366	0.167609868231119	16.8402287750785
24	5	4	A5	3	0.209287696320233	0.291046818825677	0.168035959195789	23.0552413037354
24	5	5	A5	4	0.4762323958985	0.219412930900666	0.109706465450333	27.702230646143
24	5	6	A5	3	0.396911172979667	0.146112897514928	0.0843583207123198	32.6673010612082
24	5	7	A5	4	0.282584214534725	0.186000423281452	0.093000211640726	37.7213753267965
24	5	8	A5	3	0.200721437984667	0.381385878600007	0.220193239674836	42.7571671433455
24	5	9	A5	3	0.034666077725	0.192804333694124	0.111315633959229	47.2194529360276
24	5	10	A5	3	0.0502243645993333	0.301454260245783	0.174044698301262	52.671175054694
24	5	11	A5	3	0.0573031006493333	0.405410163435473	0.23406366699168	58.1094406063543
24	5	0	A5	0	-0.417664192126333	0	0	0
242	50	1	A5	8	-0.779446105078369	0.437481957440268	0.154673229376389	7.40045912836191
242	50	2	A5	8	-0.561043774331934	0.330716160883197	0.116925820004245	14.1919398187196
242	50	3	A5	8	-0.618670932551844	0.372169731295386	0.131581870375671	20.8820418222119
242	50	4	A5	8	-0.349750570429281	0.246432640220067	0.0871270955026572	27.4314669830055
242	50	5	A5	8	-0.520415699173121	0.383669633551808	0.13564769980992	33.9756244346186
242	50	6	A5	8	-0.535319950287017	0.322919090034727	0.114169139169072	40.8559667469663
242	50	7	A5	8	-0.49890414098691	0.225142404325038	0.0795998604154388	47.5601798947136
242	50	8	A5	8	-0.425080414388003	0.303871248662409	0.107434710268406	54.1828869984354
242	50	9	A5	8	-0.590785132508435	0.438700677328116	0.155104111924921	60.7157199801827
242	50	10	A5	8	-0.373785990322882	0.240363750545858	0.0849814189812039	67.1880232618739
242	50	11	A5	8	-0.604676669458251	0.363104105081414	0.12837668748987	73.8273825273096
242	50	0	A5	0	-0.779446105078369	0	0	0
33	7	1	A5	4	-0.5994196056195	0.0781872580061449	0.0390936290030724	6.37809551444568
33	7	2	A5	3	0.0578897162767333	0.190698305171447	0.11009971782474	11.6459620243032
33	7	3	A5	4	0.0710996995995	0.319333651463347	0.159666825731674	17.8819128535188
33	7	4	A5	3	0.140363014743	0.229535628573579	0.132522456945566	23.8537709694009
33	7	5	A5	4	0.4055894979975	0.10996564238356	0.0549828211917799	29.6272170985962
33	7	6	A5	3	0.304674450882667	0.340097763101063	0.196355535077189	35.7371209348341
33	7	7	A5	3	0.178360193913333	0.117835767969127	0.0680325123571418	41.3081320071925
33	7	8	A5	3	-0.0129262525925333	0.079743530688235	0.0460399489089837	46.0519940668866
33	7	9	A5	3	0.08453070103281	0.109489636280509	0.0632138709800262	50.5130168512772
33	7	10	A5	4	0.1851343847235	0.282123402490718	0.141061701245359	55.7634727758633
33	7	11	A5	3	0.300192512191	0.205546198920679	0.118672153277758	60.6992542975145
33	7	0	A5	0	-0.5994196056195	0	0	0
6	1	1	A6	6	-0.628026476750167	0.220335931355699	0.0899517673037273	6.63146185918093
6	1	2	A6	6	0.290706281625467	0.301088751021494	0.122918967882424	12.1942228830742
6	1	3	A6	3	0.297335355225	0.0899040836023871	0.0519061468690848	17.2018858788857
6	1	4	A6	2	0.11220047099445	0.0556661872829156	0.03936193851055	23.095596140413
6	1	5	A6	3	0.320958030436	0.129482951532028	0.0747570169224835	27.2452019078713
6	1	6	A6	3	0.301888273267	0.26126324506852	0.150840404869665	31.8276559929137
6	1	7	A6	3	0.335880762904	0.121175411122651	0.0699606562308263	36.8019893960191
6	1	8	A6	3	0.215179224068333	0.137758089427265	0.0795346700138797	42.3610138731359
6	1	9	A6	4	0.322613910713535	0.252673254266054	0.126336627133027	47.5740071597718
6	1	10	A6	4	0.193994095639555	0.265891815806373	0.132945907903186	52.2996840156469
6	1	11	A6	4	0.15690158372948	0.11538200585828	0.0576910029291399	57.525245421733
6	1	0	A6	0	-0.628026476750167	0	0	0
10	2	1	A6	4	-0.47380716001875	0.0954015524643537	0.0477007762321769	6.43901805865872
10	2	2	A6	3	0.363454225235667	0.0843733257920937	0.0487129623584893	11.4878591816995
10	2	3	A6	3	0.518893684071333	0.206786622341281	0.119388312073552	15.9033968263903
10	2	4	A6	3	0.355271415122	0.141461777792465	0.0816729954885226	20.6246848010658
10	2	5	A6	3	0.350888520399	0.197235487494241	0.113873961798547	25.3880369862085
10	2	6	A6	3	0.3017414061672	0.284125337197125	0.164039839914354	30.6491277565708
10	2	7	A6	4	0.3474563593757	0.231340435954279	0.115670217977139	35.6631756091145
10	2	8	A6	4	0.300250059751	0.130919425175064	0.0654597125875322	40.5046551408651
10	2	9	A6	3	0.177513624419	0.123366762259238	0.0712258333994238	45.8879854199746
10	2	10	A6	4	0.171197298360725	0.141336437769227	0.0706682188846137	50.9100376947723
10	2	11	A6	3	0.328649436449	0.238352077652208	0.137612636194409	56.0688875027944
10	2	0	A6	0	-0.47380716001875	0	0	0
19	4	1	A6	3	-0.704835796335667	0.0572687768501871	0.0330641437306161	6.73657084300837
19	4	2	A6	4	0.28064946677925	0.090099615823663	0.0450498079118315	13.065926892271
19	4	3	A6	3	0.371515979009	0.17508659343929	0.101086291853669	18.9455040648734
19	4	4	A6	4	0.46160261771725	0.142150518782325	0.0710752593911626	24.1953854877165
19	4	5	A6	3	0.404170416951667	0.130335539359114	0.0752492587339597	28.9019347692923
19	4	6	A6	3	0.291629188913667	0.2017073936499	0.116455818021308	33.9736603990868
19	4	7	A6	3	0.239501890280667	0.173267030393431	0.100035766639334	38.718841919338
19	4	8	A6	3	0.237283193255133	0.264677766224696	0.152811779578337	43.3373314523962
19	4	9	A6	4	0.1404404354327	0.190724158685902	0.0953620793429511	48.745920534481
19	4	10	A6	4	0.222931809953475	0.10985732140754	0.0549286607037701	54.0765198669223
19	4	11	A6	4	0.2426003273403	0.195093955665769	0.0975469778328847	58.9348527797688
19	4	0	A6	0	-0.704835796335667	0	0	0
24	5	1	A6	3	-0.369781388006	0.0645280291602234	0.037255275005931	6.15576121641827
24	5	2	A6	3	-0.124177408776067	0.0299727898650066	0.0173047982969257	12.3966360481852
24	5	3	A6	6	-0.153351028875483	0.301920400576939	0.1232584873917	18.9957175266607
24	5	4	A6	3	0.1727226466523	0.17074713444518	0.0985809040352821	25.7508997148254
24	5	5	A6	4	0.33289811289775	0.139001589330189	0.0695007946650944	30.8691408278727
24	5	6	A6	3	0.367560336373	0.140890131326414	0.0813429552474667	35.7531315918247
24	5	7	A6	4	0.200231724489375	0.12042353745384	0.06021176872692	41.277338699272
24	5	8	A6	3	0.226385018407333	0.152944608506853	0.0883026108925332	46.722318563008
24	5	9	A6	3	0.327419314966333	0.142839304818542	0.0824683110878441	51.1542763055539
24	5	10	A6	3	0.131914466865233	0.152325944439521	0.0879454250267215	56.8098606626717
24	5	11	A6	3	0.163296010382	0.139664635566392	0.0806354149405272	62.3271952224859
24	5	0	A6	0	-0.369781388006	0	0	0
242	50	1	A6	8	-0.825929467951486	0.395567803072493	0.139854337985812	9.14325748390929
242	50	2	A6	8	-0.691610924565363	0.272132148114501	0.0962132436553128	17.1075081259567
242	50	3	A6	8	-0.662652319662865	0.396115316489929	0.140047913210942	24.6688061802659
242	50	4	A6	8	-0.591387597204247	0.262171812849805	0.0926917333510338	32.4350917573448
242	50	5	A6	8	-0.716321863414862	0.332165281281084	0.117438161434296	40.3067539573706
242	50	6	A6	8	-0.610269341337646	0.262958041341024	0.0929697070998854	47.891180647272
242	50	7	A6	8	-0.625715808438541	0.257312239771327	0.0909736148123022	55.9922974404349
242	50	8	A6	8	-0.671799940507465	0.241622574742656	0.0854264805441428	64.1171416934502
242	50	9	A6	8	-0.732405129224779	0.343679617509042	0.121509094048121	71.6173662840523
242	50	10	A6	8	-0.613966692001135	0.265779633128039	0.0939672904430546	79.8139851426556
242	50	11	A6	8	-0.676186316570566	0.378997331097985	0.133995791435494	87.3532014708493
242	50	0	A6	0	-0.825929467951486	0	0	0
33	7	1	A6	4	-0.69628892886375	0.0384306738395443	0.0192153369197722	6.98532007677286
33	7	2	A6	3	-0.148713123256033	0.132609687508191	0.0765622387800064	13.0638213546692
33	7	3	A6	4	-0.6293539528205	0.100430700320349	0.0502153501601745	20.034238211859
33	7	4	A6	3	-0.640084662157667	0.249553778105981	0.144079940966776	26.5980538851162
33	7	5	A6	4	-0.449324131817	0.0927281200928339	0.046364060046417	33.6413404867364
33	7	6	A6	3	-0.630133005039667	0.0473846546848336	0.0273575431377461	40.6444017628432
33	7	7	A6	3	-0.670708404624667	0.262542109351906	0.151578757507935	47.2279201684191
33	7	8	A6	3	-0.548793528952667	0.166329445632533	0.096030350210104	53.39704602667
33	7	9	A6	3	-0.564706329443	0.0766636782206468	0.0442617952577573	59.6057436341402
33	7	10	A6	4	-0.57914094720625	0.0808715307398269	0.0404357653699135	66.4955007170499
33	7	11	A6	3	-0.674541573321	0.237779841380174	0.13728225542871	73.328405926769
33	7	0	A6	0	-0.69628892886375	0	0	0
6	1	1	A7	6	-0.442281493987	0.164723645601404	0.0672481467157483	6.52253541892204
6	1	2	A7	6	0.360723198234833	0.239885514197947	0.0979328510783565	12.2009692926071
6	1	3	A7	3	0.2286848205794	0.133157295370135	0.0768784003265102	17.5724862480405
6	1	4	A7	4	0.47210678150675	0.371255763037732	0.185627881518866	23.9659770212956
6	1	5	A7	3	0.344327051073333	0.0996554976355343	0.0575361283861018	28.67304566195
6	1	6	A7	3	0.312128813888	0.112484981903856	0.0649432345819814	33.5454819442616
6	1	7	A7	3	0.257587300403333	0.127791038697581	0.07378019059207	38.4343934389765
6	1	8	A7	3	0.206197827684433	0.164040677246443	0.0947089291662824	43.2996171606201
6	1	9	A7	4	0.6209154081915	0.365685424904887	0.182842712452443	48.4280452608564
6	1	10	A7	4	0.2980576063245	0.0466512591812504	0.0233256295906252	53.2799927431606
6	1	11	A7	4	0.49470676964925	0.171814529118629	0.0859072645593147	58.434963527084
6	1	0	A7	0	-0.442281493987	0	0	0
10	2	1	A7	4	-0.361107278775	0.152965419058193	0.0764827095290964	6.23896749448359
10	2	2	A7	3	0.371839329386667	0.0958801008652764	0.0553564020444958	11.3668790644318
10	2	3	A7	3	0.529042974484333	0.181415818799178	0.104740471818962	16.1040066106506
10	2	4	A7	3	0.330592458768333	0.0996745312458518	0.0575471174461423	21.0901586308055
10	2	5	A7	3	0.364695289354	0.189376626935097	0.109336646539202	25.7735350161353
10	2	6	A7	3	0.380396571249	0.0359932550200372	0.0207807154748293	30.8045789241751
10	2	7	A7	4	0.30998706147225	0.0890204282774742	0.0445102141387371	35.941388142161
10	2	8	A7	4	0.29734714879425	0.162689455707281	0.0813447278536406	40.9683833411101
10	2	9	A7	3	0.324184299539333	0.14550070903796	0.0840048735303475	45.9847240720508
10	2	10	A7	4	0.3559317700915	0.145338835686689	0.0726694178433444	50.7592568185038
10	2	11	A7	3	0.332865968984933	0.249740659552207	0.144187837020061	55.5112785204317
10	2	0	A7	0	-0.361107278775	0	0	0
19	4	1	A7	3	-0.679596909317333	0.155562357343754	0.0898139688881892	6.53985062946884
19	4	2	A7	4	0.514229172513	0.130234162350742	0.0651170811753712	12.3588281786332
19	4	3	A7	3	0.357762763136333	0.0819919109874841	0.0473380518799958	18.2405769635611
19	4	4	A7	4	0.47733199217725	0.175920107748491	0.0879600538742457	23.5702335176454
19	4	5	A7	3	0.359199231643333	0.134286800817561	0.0775305206006323	28.2550407239067
19	4	6	A7	3	0.261011784207417	0.24089889465618	0.139083041677229	33.3672958448168
19	4	7	A7	3	0.206087454492667	0.272474854868103	0.157313430805504	38.1930728131302
19	4	8	A7	3	0.31118067292	0.0841718658948084	0.0485966494325607	43.0380350978689
19	4	9	A7	4	0.425049588171	0.165101495131339	0.0825507475656695	48.4931511726299
19	4	10	A7	4	0.42345545622225	0.0422890412177704	0.0211445206088852	53.6447394691798
19	4	11	A7	4	0.46221883604725	0.178320966874603	0.0891604834373015	58.3195839890236
19	4	0	A7	0	-0.679596909317333	0	0	0
24	5	1	A7	3	-0.452087346931333	0.110845366747465	0.0639966023300718	6.28478369562841
24	5	2	A7	3	0.153536913489	0.330115055968066	0.190592016426711	12.7759804637742
24	5	3	A7	6	0.250091275854517	0.159425037729977	0.0650849991103999	18.5165512566259
24	5	4	A7	3	0.212474721457333	0.0589024057365541	0.0340073198079161	24.9457489008238
24	5	5	A7	4	0.45617584064275	0.225752142103477	0.112876071051738	29.9373558569658
24	5	6	A7	3	0.377643885476333	0.0702463315432625	0.0405567384260863	34.8814421467537
24	5	7	A7	4	0.50214653380675	0.137287270697483	0.0686436353487417	40.2807638888701
24	5	8	A7	3	0.338357797610933	0.223689310197284	0.129147083457244	45.4264437098095
24	5	9	A7	3	0.464334185015	0.0172653374868663	0.00996814724569197	49.9388062151319
24	5	10	A7	3	0.382359037722667	0.03738546482946	0.021584508183068	55.0237650058956
24	5	11	A7	3	0.233663111123	0.0554909891221533	0.0320377375072738	60.3360596741034
24	5	0	A7	0	-0.452087346931333	0	0	0
242	50	1	A7	8	-0.688308801529127	0.403507414792787	0.142661414629516	7.86743113247458
242	50	2	A7	8	-0.672311079419294	0.362461481837541	0.128149485863125	15.2514649642512
242	50	3	A7	8	-0.657815375515587	0.393458384012888	0.139108545725107	22.7325757172374
242	50	4	A7	8	-0.600037901499771	0.351275788891912	0.124194746196063	30.0524824934815
242	50	5	A7	8	-0.68031375290247	0.381029712774993	0.13471434686838	37.4365842311181
242	50	6	A7	8	-0.694619195914811	0.351998021003348	0.124450093807856	44.783942197641
242	50	7	A7	8	-0.682779620931107	0.397191756855998	0.140428492352137	52.343623574563
242	50	8	A7	8	-0.717825391618295	0.390152131154108	0.137939608816726	59.9691721330491
242	50	9	A7	8	-0.648169007802253	0.368519949972922	0.13029147781419	67.2546875761238
242	50	10	A7	8	-0.606436182547711	0.301065806056666	0.106442836523031	74.762669108818
242	50	11	A7	8	-0.609639532284653	0.350333720250539	0.123861674633734	81.8912682080616
242	50	0	A7	0	-0.688308801529127	0	0	0
33	7	1	A7	4	-0.67181478949175	0.0413402618904957	0.0206701309452478	7.15466838900071
33	7	2	A7	3	0.0613535796144667	0.0862567981842475	0.0498003856511105	13.4726777689393
33	7	3	A7	4	0.20776811161075	0.0939360428534046	0.0469680214267023	19.9270849545178
33	7	4	A7	3	0.187745887546	0.0718068821089931	0.0414577227152949	25.4526864124271
33	7	5	A7	4	0.611289776557	0.165731562612513	0.0828657813062567	31.0540347838541
33	7	6	A7	2	0.2632116378395	0.0557460783919434	0.0394184300555	36.5549783138731
33	7	7	A7	3	-0.0176578571173333	0.0886334676813519	0.0511725564250385	42.0806962440842
33	7	8	A7	3	0.2575011754918	0.315386620024089	0.182088549969714	46.421880468374
33	7	9	A7	3	0.253175759934333	0.162749080979241	0.0939632257137289	50.7400345252044
33	7	10	A7	4	0.22682556525375	0.0806352591649562	0.0403176295824781	56.165653462791
33	7	11	A7	3	0.305694486551667	0.124869803401861	0.07209361460772	61.0181983465969
33	7	0	A7	0	-0.67181478949175	0	0	0
6	1	9	A8	4	0.21785650774475	0.295537884345165	0.147768942172582	49.4627511038301
6	1	10	A8	4	0.1980917897392	0.15148493129085	0.0757424656454248	54.5671579047023
6	1	11	A8	4	0.2700315088505	0.13886432990549	0.0694321649527452	59.7179228744227
6	1	1	A8	6	-0.441972263083333	0.20005772916096	0.0816732259240444	6.63925512714636
6	1	2	A8	6	0.344626170695217	0.200483352070537	0.0818469857492613	12.2622999152907
6	1	3	A8	3	0.0578961404296667	0.224427014912705	0.129572997473274	18.2172407339031
6	1	4	A8	4	0.2285116276348	0.20123035468122	0.10061517734061	23.5074547079039
6	1	5	A8	3	0.217058706332333	0.183930020735165	0.106192046983501	27.8157587431851
6	1	6	A8	3	-0.0292178891725	0.235973150092697	0.136239161727543	32.7768693187026
6	1	7	A8	3	-0.153073918198667	0.0485350339288365	0.0280217149039414	38.7604509982057
6	1	8	A8	3	-0.0566166918653333	0.289335634563207	0.167048006501219	44.3655534183876
6	1	0	A8	0	-0.441972263083333	0	0	0
10	2	1	A8	4	-0.309960231453	0.127610214491338	0.0638051072456691	6.3281757804023
10	2	2	A8	3	0.0933790273918667	0.14247094911	0.0822556408203599	11.9439561762137
10	2	3	A8	3	0.383355824631667	0.140158287568878	0.0809204250570487	16.4824869112817
10	2	4	A8	3	0.264156427981333	0.095224847931904	0.054978091587026	21.2847192226679
10	2	5	A8	3	0.305457747946	0.107886539429871	0.0622883225817734	26.0482981236697
10	2	6	A8	3	0.273289942164133	0.21236281641332	0.122607729222098	31.0646947876149
10	2	7	A8	4	0.498836752679	0.247313147865943	0.123656573932971	36.0604339675082
10	2	8	A8	4	0.26504918001775	0.042509441885219	0.0212547209426095	41.2256204413372
10	2	9	A8	3	0.229014412528067	0.189863564740154	0.10961778021203	46.1479376349471
10	2	10	A8	4	0.33059041444775	0.151762308962991	0.0758811544814955	51.4575416860825
10	2	11	A8	3	0.597230220024	0.100053960890605	0.0577661812536793	55.8578668088091
10	2	0	A8	0	-0.309960231453	0	0	0
19	4	1	A8	3	-0.804256581850333	0.127051516387474	0.0733532271872581	6.55953457058591
19	4	2	A8	4	0.6983475021575	0.332524865709806	0.166262432854903	12.071156666214
19	4	3	A8	3	0.636352840686333	0.0891243477934006	0.0514559661898697	17.1271009555493
19	4	4	A8	4	0.879996082509	0.441806693850561	0.22090334692528	22.1243290394103
19	4	5	A8	3	0.438960778295333	0.34637228282919	0.199978130731258	26.5492696908629
19	4	6	A8	3	0.483809293320333	0.0545583439055987	0.0314992745404376	31.3633813325057
19	4	7	A8	3	0.362482167932333	0.116536730688698	0.0672825128335985	35.959644859515
19	4	8	A8	3	0.339471849958667	0.289555377064943	0.167174874893748	40.4354031458922
19	4	9	A8	4	0.60701186669125	0.228043337405639	0.114021668702819	45.0019507129191
19	4	10	A8	4	0.628820375785	0.199986160689619	0.0999930803448094	49.7365117816621
19	4	11	A8	4	0.75101897704875	0.128402933603283	0.0642014668016416	54.120737546795
19	4	0	A8	0	-0.804256581850333	0	0	0
24	5	1	A8	3	-0.251650941039	0.133872885032615	0.077291546210772	5.58491392462256
24	5	2	A8	3	0.254352432194	0.0696992778888153	0.0402408968514301	11.0318810588065
24	5	3	A8	6	0.281975907770717	0.193131287339521	0.0788455178914444	16.4980878453884
24	5	4	A8	3	0.286235078987	0.0933788812399823	0.0539123222205299	21.8447646731801
24	5	5	A8	4	0.4289687342635	0.157720187921845	0.0788600939609225	26.7109549341376
24	5	6	A8	3	0.229681198683033	0.229543967905677	0.132527271661197	31.4155458901388
24	5	7	A8	4	0.69400774241875	0.299848204501566	0.149924102250783	35.958190801052
24	5	8	A8	3	0.524053802450667	0.250917713111075	0.144867409209125	40.4562425470925
24	5	9	A8	3	0.612028526195667	0.133725960517678	0.0772067193025229	44.5367220711377
24	5	10	A8	3	0.493754750411667	0.0964639354785306	0.0556934791156204	49.2564871656718
24	5	11	A8	3	0.565169483569	0.0724967637766133	0.0418560260818044	53.968245725467
24	5	0	A8	0	-0.251650941039	0	0	0
242	50	1	A8	8	-0.421216097453813	0.395838868197407	0.139950173979797	6.58486231372778
242	50	2	A8	8	-0.261236280250519	0.345853259562228	0.122277592565961	13.0367287456144
242	50	3	A8	8	-0.321230511168699	0.344732291010495	0.121881270333747	19.1606098441356
242	50	4	A8	8	0.0268559853879074	0.424362456531164	0.150034785347084	25.0386157983336
242	50	5	A8	8	-0.420759256236063	0.438389699223135	0.154994164561505	31.4161418244074
242	50	6	A8	8	-0.154474981015611	0.485685748383927	0.171715843103969	37.5476896206332
242	50	7	A8	8	-0.143709805742315	0.384410599547789	0.135909670850114	43.5270932693508
242	50	8	A8	8	-0.228859373330623	0.484611260972275	0.17133595443643	49.6504828718638
242	50	9	A8	8	-0.297929778432386	0.424741542952447	0.150168812636656	55.8775665419997
242	50	10	A8	8	-0.216992211165011	0.477071702517575	0.168670317981194	61.9958117109197
242	50	11	A8	8	-0.284022528410878	0.390987923100989	0.138235105893377	68.2209815387355
242	50	0	A8	0	-0.421216097453813	0	0	0
33	7	1	A8	4	-0.4419475966685	0.152984489247874	0.0764922446239368	6.19835695363492
33	7	2	A8	3	0.677516706916333	0.173363108297181	0.100091237242927	10.8058847419807
33	7	3	A8	4	0.59213549634425	0.107925157888227	0.0539625789441135	15.7714691235685
33	7	4	A8	3	0.338850426997	0.236168957866479	0.136352211398445	20.3829883828093
33	7	5	A8	4	0.84554548624475	0.298667302132454	0.149333651066227	24.7567405937736
33	7	6	A8	3	0.596317588987333	0.0342451174200044	0.0197714277608699	29.3615030126269
33	7	7	A8	3	0.352829482955	0.195355385439677	0.112788484371241	33.8861956854797
33	7	8	A8	3	0.688686834548667	0.193570374972867	0.111757908097721	37.8611727253615
33	7	9	A8	3	0.548252524872333	0.14989410075888	0.0865413994230763	41.6348715107743
33	7	10	A8	4	0.544239046346	0.184957110367079	0.0924785551835397	46.2825736494832
33	7	11	A8	3	0.480459647998667	0.258302936460909	0.149131269898176	50.5311498079101
33	7	0	A8	0	-0.4419475966685	0	0	0
6	1	1	A9	6	-0.570173881695833	0.201660899549393	0.0823277174944443	6.60334775127688
6	1	2	A9	6	0.391406524374	0.177068819239648	0.0722880427490411	11.8384552905001
6	1	3	A9	3	0.357019086346	0.132418356226366	0.0764517736129404	16.6348004928888
6	1	4	A9	4	0.46929794039	0.156649277002656	0.0783246385013279	21.3281281728075
6	1	5	A9	3	0.569285396678333	0.209462580432924	0.120933277198102	25.0594107270545
6	1	6	A9	3	0.339419187699967	0.24715315809976	0.142693942359962	29.0391987795856
6	1	7	A9	3	0.309564964757	0.230966521242204	0.133348583212978	33.6815745911794
6	1	8	A9	3	0.763600943454333	0.0311122475983447	0.0179626645259986	38.140563925625
6	1	9	A9	4	0.42292767312475	0.184593956315563	0.0922969781577814	42.8350177410483
6	1	10	A9	4	0.70287112076825	0.175527771333177	0.0877638856665887	47.1730159313514
6	1	11	A9	4	0.5268159999545	0.271414781840826	0.135707390920413	51.7874037092631
6	1	0	A9	0	-0.570173881695833	0	0	0
10	2	3	A9	3	0.44881656893	0.208623228242881	0.120448676985236	15.4617939267709
10	2	4	A9	3	0.50762357698	0.128005720483221	0.0739041371787998	20.0469534274366
10	2	5	A9	3	0.348238794665333	0.0359510962418423	0.0207563750928898	24.7820006941123
10	2	6	A9	3	0.458227358959967	0.314855970458725	0.181782179300306	29.6370625600353
10	2	7	A9	4	0.56545898643675	0.184109563002467	0.0920547815012336	34.1283969106836
10	2	8	A9	4	0.4831255834445	0.0698416204735311	0.0349208102367656	38.5794119792498
10	2	9	A9	3	0.594564462945333	0.0237382419339734	0.013705280370668	43.1062669015818
10	2	10	A9	4	0.36053994064325	0.102445633174392	0.0512228165871961	47.7713883990534
10	2	11	A9	3	0.775288907068333	0.146913412889165	0.0848204984791259	52.1197879242566
10	2	1	A9	4	-0.3611568631775	0.170703918245699	0.0853519591228497	6.18597724657029
10	2	2	A9	3	0.284645299066333	0.0702836742030563	0.0405782982207705	11.350058943345
10	2	0	A9	0	-0.3611568631775	0	0	0
19	4	1	A9	2	-0.6570826174495	0.0132850959055104	0.00939398140350001	6.27307343018097
19	4	2	A9	4	0.47251128163875	0.185869049404282	0.0929345247021409	11.6706751544784
19	4	3	A9	3	0.440251924558333	0.135624951478545	0.078303102244968	17.0647363606391
19	4	4	A9	4	0.34846855853295	0.339841247432662	0.169920623716331	22.1831440246472
19	4	5	A9	3	0.2328390530092	0.160010042111139	0.0923818408859097	27.3884104156889
19	4	6	A9	3	0.170662202478333	0.247139179702788	0.142685871928708	32.59988416102
19	4	7	A9	3	0.101162500982667	0.211499228201377	0.122109136335463	37.9343457411828
19	4	8	A9	3	0.201235444356333	0.0433582229765426	0.0250328817070907	42.3685840022798
19	4	9	A9	4	0.1710611088567	0.16125080560237	0.0806254028011851	47.5688070038722
19	4	10	A9	4	0.368159817538	0.167509666623666	0.0837548333118331	52.6402832991256
19	4	11	A9	4	0.3181585700425	0.0812870207190992	0.0406435103595496	57.3470225724341
19	4	0	A9	0	-0.6570826174495	0	0	0
24	5	1	A9	3	-0.421027064560667	0.265578600643727	0.15333187657266	5.68190054525725
24	5	2	A9	3	0.221590329183333	0.0908135934138346	0.0524312526035546	10.8831983909936
24	5	3	A9	6	0.3970596309005	0.189745056812175	0.0774630950675391	15.9740595495959
24	5	4	A9	3	0.219426320319933	0.124241429522985	0.0717308227795993	21.8235399286112
24	5	5	A9	4	0.2998571990174	0.176372555459758	0.0881862777298789	26.5621637877451
24	5	6	A9	3	0.134945529137147	0.125166112893827	0.0722646889726699	31.6997404933918
24	5	7	A9	4	0.19245518277195	0.246280967796422	0.123140483898211	36.5390403671038
24	5	8	A9	3	0.276618123471	0.119370437870238	0.0689185544376656	41.5371931870246
24	5	9	A9	3	0.2418833685401	0.253434457107547	0.146320452032969	46.104513712288
24	5	10	A9	3	0.1365366389515	0.0899745632225136	0.0519468382967372	51.5615514478419
24	5	11	A9	3	0.426761959167667	0.0857125926301843	0.0494861884279776	56.6348113575477
24	5	0	A9	0	-0.421027064560667	0	0	0
242	50	1	A9	8	-0.661852333394986	0.372485000226317	0.131693334775151	7.21685502036371
242	50	2	A9	8	-0.689162731090584	0.414905651496308	0.146691299862831	14.4254051588228
242	50	3	A9	8	-0.61859116405644	0.415105153858558	0.146761834599436	21.2829629451204
242	50	4	A9	8	-0.613379095487499	0.244534767365881	0.0864560961201448	28.489486412991
242	50	5	A9	8	-0.675759920912936	0.417941850649045	0.147764758367798	35.9941361982583
242	50	6	A9	8	-0.664207025160711	0.335491112389669	0.118614020299277	43.4628211881752
242	50	7	A9	8	-0.515777124849141	0.496406190072665	0.17550609161168	50.7198713501608
242	50	8	A9	8	-0.47796181914008	0.25465931162801	0.0900356630722319	57.6560438666729
242	50	9	A9	8	-0.597898986491083	0.340184027252211	0.120273216260694	64.9205384003679
242	50	10	A9	8	-0.456335914419304	0.339743665218142	0.12011752477046	72.1776825382395
242	50	11	A9	8	-0.603314198649382	0.339028167295422	0.11986455805392	79.3412860921233
242	50	0	A9	0	-0.661852333394986	0	0	0
33	7	1	A9	4	-0.47776872427675	0.15241299717511	0.076206498587555	6.28278532253927
33	7	2	A9	3	0.284483707326967	0.314258969467954	0.181437500617578	11.7818847820305
33	7	3	A9	4	0.38390153232175	0.117997657079771	0.0589988285398854	17.4760142762855
33	7	4	A9	2	0.3144536066975	0.14856817667088	0.1050535651925	22.5858659195681
33	7	5	A9	4	0.31651021802275	0.158378991346333	0.0791894956731664	27.5785333254559
33	7	6	A9	3	0.2407812170239	0.22925210463043	0.132358764320667	33.3293609181377
33	7	7	A9	3	0.189147404663267	0.132935652205575	0.0767504345857869	38.4536024516494
33	7	8	A9	3	0.317086215189267	0.432289167074072	0.249582266977975	42.9459700775751
33	7	9	A9	3	0.274806939581	0.247247531422773	0.142748428823409	47.4640982371188
33	7	10	A9	4	0.088632660506675	0.220410601776935	0.110205300888467	52.8607536885426
33	7	11	A9	3	0.1797980499946	0.174276261499108	0.100618446489872	57.8996312726841
33	7	0	A9	0	-0.47776872427675	0	0	0
6	1	1	B1	6	-0.786399767513167	0.122724133475786	0.0501019176901488	6.47471940095983
6	1	2	B1	6	0.0251993513557567	0.158991919033598	0.0649081791430353	11.6057583778171
6	1	3	B1	3	0.174188088640467	0.0787560190104657	0.0454698087759957	16.5677094196652
6	1	4	B1	4	0.172984333046775	0.191377584454245	0.0956887922271225	21.8083044190578
6	1	5	B1	3	-0.217992442975557	0.195466717725338	0.112852762096336	26.6706272691384
6	1	6	B1	3	0.129967158087667	0.418595776712786	0.241676384366768	30.4153440213466
6	1	7	B1	3	0.215202190250467	0.355131454732997	0.205035240987799	34.7647924118318
6	1	8	B1	3	0.276484721265	0.427087607583355	0.246579145205803	39.1784563335817
6	1	9	B1	4	0.338266065644275	0.183624932604704	0.0918124663023518	43.6577102773508
6	1	10	B1	4	0.173903155632325	0.237230923964963	0.118615461982482	48.1128602141289
6	1	11	B1	4	0.278100112256862	0.23452534789291	0.117262673946455	52.6521205596786
6	1	0	B1	0	-0.786399767513167	0	0	0
10	2	1	B1	4	-0.71101896253375	0.209121320022281	0.104560660011141	6.08750516733229
10	2	2	B1	3	-0.00940988088115	0.232442744038179	0.134200880841618	11.3212491050805
10	2	3	B1	3	-0.230949975944667	0.145240753589959	0.0838547881824672	16.056200302354
10	2	4	B1	3	0.208327928154667	0.0495580431071773	0.0286123495284399	20.5772152533301
10	2	5	B1	3	-0.130923428291367	0.061529511870311	0.0355240802414303	25.6660484845577
10	2	6	B1	3	0.0765678955216333	0.038502756954245	0.0222295770920761	30.2324624624861
10	2	7	B1	4	0.056061705482065	0.140914305800908	0.0704571529004541	35.5702496088066
10	2	8	B1	4	0.27188463039	0.11076672124222	0.0553833606211098	40.134889810109
10	2	9	B1	3	0.0664675908759967	0.0618777586598015	0.0357251406190871	44.8853037896988
10	2	10	B1	4	0.36542100180375	0.112979587946336	0.056489793973168	49.5372255767139
10	2	11	B1	3	0.165465248780067	0.079472217441534	0.0458833061329662	54.18936716566
10	2	0	B1	0	-0.71101896253375	0	0	0
19	4	1	B1	3	-1.00353421870633	0.0600954274958378	0.0346961112417876	6.09104850562704
19	4	2	B1	4	0.071834741784875	0.104284796782691	0.0521423983913456	12.0679506545896
19	4	3	B1	3	0.0840598126020333	0.0400533899558196	0.0231248354729495	17.8966417950126
19	4	4	B1	4	0.097881541044075	0.182681813768492	0.0913409068842459	23.6978943486094
19	4	5	B1	3	0.113658321659967	0.166168101984936	0.0959371984117321	28.8142051602498
19	4	6	B1	3	0.1327578799584	0.0482602270895442	0.0278630551013008	34.3024336275138
19	4	7	B1	3	-0.0705052642928	0.119058542101115	0.068738481331403	39.6203792855099
19	4	8	B1	3	0.0334432050337	0.155938669128687	0.0900312325985195	43.9775852215662
19	4	9	B1	4	0.184138787038725	0.0593255545522865	0.0296627772761432	48.8941078484837
19	4	10	B1	4	0.2056398465704	0.108390176559304	0.054195088279652	53.9116820975769
19	4	11	B1	4	0.25797304829175	0.0532382808192194	0.0266191404096097	58.3748464558994
19	4	0	B1	0	-1.00353421870633	0	0	0
24	5	1	B1	3	-0.682921582656333	0.0460542022706005	0.0265894060782447	5.31342334048919
24	5	2	B1	3	-0.764776418310333	0.0688573537590001	0.039754811728444	10.5317828153702
24	5	3	B1	6	-0.693818837118333	0.130693772666932	0.0533555092655478	16.4062073142047
24	5	4	B1	3	-0.670331941319333	0.209051800902976	0.120696113525909	22.48395734728
24	5	5	B1	4	-0.6072328879205	0.100829797926267	0.0504148989631334	28.1071301695773
24	5	6	B1	3	-0.742417880902333	0.191303818407225	0.110449311054414	33.7147162460769
24	5	7	B1	4	-0.46875155867675	0.101075170409253	0.0505375852046264	39.4461220933645
24	5	8	B1	3	-0.695076880917333	0.236807815444494	0.136721055993086	45.4444933062192
24	5	9	B1	3	-0.694517847023333	0.119090602443384	0.0687569913786422	50.5572927386548
24	5	10	B1	3	-0.727989751947333	0.176358818325955	0.101820811234455	56.2302238530588
24	5	11	B1	3	-0.710399420321	0.213676221771551	0.123366024159227	62.0257637962034
24	5	0	B1	0	-0.682921582656333	0	0	0
242	50	1	B1	8	-0.53092874250758	0.349539379718106	0.123580832845206	7.13983364362368
242	50	2	B1	8	-0.386080154447807	0.282436073618147	0.0998562314535475	13.7296878741404
242	50	3	B1	8	-0.339665350907453	0.340879470046537	0.120519092418591	20.4020991786272
242	50	4	B1	8	-0.399986883887679	0.291160774165568	0.102940878913999	26.9405719187742
242	50	5	B1	8	-0.560705559463526	0.359447299349779	0.12708381142471	33.7165941695272
242	50	6	B1	8	-0.475245503148977	0.326449157894554	0.115417206629938	40.1925632787901
242	50	7	B1	8	-0.290703489934816	0.338466450694994	0.119665961245286	46.6368303293435
242	50	8	B1	8	-0.480814963377621	0.332525443739387	0.117565498092593	53.2853589392846
242	50	9	B1	8	-0.48885696587532	0.371684400717445	0.131410280104282	60.0509406790751
242	50	10	B1	8	-0.532475672226649	0.350236944206982	0.123827459135406	66.7581440288531
242	50	11	B1	8	-0.424640022171091	0.30253089692582	0.106960824367348	73.3392194176775
242	50	0	B1	0	-0.53092874250758	0	0	0
33	7	1	B1	4	-0.72582869033325	0.293612342616396	0.146806171308198	6.22177635431697
33	7	2	B1	3	-0.67378006602	0.0979330388279278	0.0565416663298622	11.4483290169005
33	7	3	B1	4	-0.68453356192275	0.232867745467491	0.116433872733745	17.5662439485466
33	7	4	B1	3	-0.872252421922	0.181031971213913	0.104518857312281	23.3036687415039
33	7	5	B1	4	-0.56772127409575	0.0749042118255088	0.0374521059127544	29.1726460751814
33	7	6	B1	3	-0.694789602748333	0.255134762967092	0.147302124078682	35.1562431595638
33	7	7	B1	3	-0.928773902774	0.139184875248522	0.0803584251918589	40.8537209470578
33	7	8	B1	3	-0.887408666612333	0.188954547144777	0.109092958658641	46.3114216629078
33	7	9	B1	3	-0.890079680862	0.124310155596386	0.0717705017965776	51.3973975479662
33	7	10	B1	4	-0.78585323485925	0.181675513388274	0.0908377566941371	57.6468336693515
33	7	11	B1	3	-0.884334628320667	0.228521004997891	0.131936663751016	63.5044257797893
33	7	0	B1	0	-0.72582869033325	0	0	0
6	1	1	B10	6	-0.496216209477833	0.111394326647239	0.0454765434211084	6.73017904919761
6	1	2	B10	6	0.225609786775707	0.264828516511145	0.108115789131756	12.2262305199203
6	1	3	B10	3	-0.0196976619268533	0.0656513462076644	0.0379038224056564	17.8850303250237
6	1	4	B10	4	-0.003698438889325	0.177313337093476	0.0886566685467379	23.5094186832997
6	1	5	B10	3	0.346736016556	0.108078423421478	0.0623991068559808	27.4465137720151
6	1	6	B10	3	0.176149177036967	0.162022106028023	0.0935435065299489	31.3600357369946
6	1	7	B10	3	0.1799315062204	0.208044477488869	0.120114535081613	36.2217147552871
6	1	8	B10	3	0.292609323515333	0.102434086785164	0.0591403475796079	41.0909016679115
6	1	9	B10	4	0.26013782801225	0.0935026807685003	0.0467513403842501	45.919374738299
6	1	10	B10	4	0.181706381552425	0.114360985910173	0.0571804929550865	50.7150467537323
6	1	11	B10	4	0.125287954213395	0.176087096944761	0.0880435484723803	56.0461781685133
6	1	0	B10	0	-0.496216209477833	0	0	0
10	2	1	B10	4	-0.3068318052635	0.18758228082379	0.0937911404118948	6.03551374425112
10	2	2	B10	2	-0.03272732162395	0.0665547542103607	0.04706131802235	10.9777823993217
10	2	3	B10	3	0.331033911732133	0.370805916976628	0.214084895983562	15.0432807818851
10	2	4	B10	3	0.408474513495333	0.212337643497318	0.122593195632267	19.0967430229442
10	2	5	B10	3	0.411851733260667	0.337090632006007	0.194619367129969	23.0596245526383
10	2	6	B10	3	1.02775854148033	0.155349489990939	0.0896910698647395	27.1628640832248
10	2	7	B10	4	0.93614972686025	0.597223372277115	0.298611686138557	31.511596664735
10	2	8	B10	4	0.82778752468725	0.272725413898236	0.136362706949118	35.7815629934041
10	2	9	B10	3	1.01055590130967	0.13436275838269	0.0775743747213069	39.9055976267039
10	2	10	B10	4	0.79203702310925	0.242281955128266	0.121140977564133	44.1697149516968
10	2	11	B10	3	1.03605533208267	0.122923642368683	0.0709699980113285	48.1926148369404
10	2	0	B10	0	-0.3068318052635	0	0	0
19	4	1	B10	3	-0.656161254539	0.158729797757477	0.0916426914636942	5.26817590090608
19	4	2	B10	4	0.295079793334665	0.294041783500573	0.147020891750287	11.4057747660597
19	4	3	B10	3	-0.0504847451821	0.105992705421536	0.0611949170072606	17.880324255218
19	4	4	B10	4	0.08663461763675	0.213699590102995	0.106849795051497	23.8301680606867
19	4	5	B10	3	0.289365164134333	0.080540086739695	0.0464998407597187	28.8001167941405
19	4	6	B10	3	0.0942513838759	0.124783097227349	0.072043554774525	35.045466765551
19	4	7	B10	3	0.227264557102767	0.164928496331897	0.095221511754261	39.2724325365581
19	4	8	B10	3	0.117979661620167	0.172183359963945	0.0994101092251581	43.226271421239
19	4	9	B10	4	0.250884016876	0.0385612894320926	0.0192806447160463	48.4185863528016
19	4	10	B10	4	0.27391898224445	0.466848961107883	0.233424480553942	54.0110748286695
19	4	11	B10	4	0.18149340197225	0.107507876644345	0.0537539383221724	58.8129466556259
19	4	0	B10	0	-0.656161254539	0	0	0
24	5	1	B10	3	-0.317647695536	0.177987419738735	0.102761084698526	5.08994378776755
24	5	2	B10	3	-0.312467895357333	0.151301731967472	0.0873540956802768	10.8103112903826
24	5	3	B10	6	-0.0649715138794167	0.330304742425968	0.134846346427508	16.9944129446018
24	5	4	B10	3	0.273931435225133	0.275003028236426	0.158773072380263	22.4322896004872
24	5	5	B10	4	0.165851681244428	0.111180707922542	0.0555903539612711	27.6649584251461
24	5	6	B10	3	0.15391558895772	0.16296937580304	0.0940904129895506	32.7516618015655
24	5	7	B10	4	0.209924210251	0.082321632310244	0.041160816155122	37.8445035725389
24	5	8	B10	3	0.2874486915866	0.188661937918476	0.108924020643069	42.8200188385174
24	5	9	B10	3	0.104511291572133	0.106227063572989	0.0613302237490888	46.8921473772782
24	5	10	B10	3	0.280494256079	0.0820092346460013	0.047348053698904	51.7749161297535
24	5	11	B10	3	0.347704178878333	0.122838259612132	0.0709207022538498	56.6354854840062
24	5	0	B10	0	-0.317647695536	0	0	0
242	50	1	B10	8	-0.775573179715428	0.432248718430276	0.152822999980621	8.59343165150252
242	50	2	B10	8	-0.688030529741794	0.335284607438782	0.118541009773716	15.9681995574399
242	50	3	B10	8	-0.612057327327615	0.371111715629041	0.131207805349534	23.2006021372313
242	50	4	B10	8	-0.680224075989912	0.31283079092508	0.110602386813538	30.6872295864488
242	50	5	B10	8	-0.624445080472527	0.383621909276305	0.135630826730503	38.0913133688672
242	50	6	B10	8	-0.6526242918621	0.345450398238286	0.122135159578943	45.8268592038566
242	50	7	B10	8	-0.654999350692371	0.331570834889576	0.117227992897052	53.393572065613
242	50	8	B10	8	-0.657123215693744	0.345713569890844	0.122228204809013	61.0898244265644
242	50	9	B10	8	-0.622204024955876	0.37610466421525	0.132973079251246	68.4364228463642
242	50	10	B10	8	-0.706941088574142	0.393259088105019	0.139038083981149	76.0763108947213
242	50	11	B10	8	-0.663819932532527	0.388739329271642	0.137440107920944	83.5357633627861
242	50	0	B10	0	-0.775573179715428	0	0	0
33	7	1	B10	4	-0.5025605295005	0.157949320581972	0.0789746602909858	6.61164536433055
33	7	2	B10	3	-0.459217465925667	0.14406673030437	0.0831769655224973	11.9875281650854
33	7	3	B10	4	-0.43883801723625	0.125226548731069	0.0626132743655344	18.0883778528737
33	7	4	B10	3	-0.640044465673667	0.140702111897305	0.081234402179458	23.7796195654207
33	7	5	B10	4	-0.40097754042475	0.041804938072881	0.0209024690364405	30.1399118835649
33	7	6	B10	3	-0.521432149661333	0.0672775770215655	0.0388427272038266	36.5197547022857
33	7	7	B10	3	-0.764973042065667	0.104751000556861	0.0604780183693863	42.1249470237691
33	7	8	B10	3	-0.445804432926	0.19151091960361	0.110568880985897	47.2758554233334
33	7	9	B10	3	-0.293726963152733	0.224521426813102	0.129627506209384	52.3086077380535
33	7	10	B10	4	-0.419578492294	0.128234838420328	0.0641174192101642	58.1050671654305
33	7	11	B10	3	-0.577422493127667	0.139666572664174	0.080636533324453	63.657857417328
33	7	0	B10	0	-0.5025605295005	0	0	0
6	1	1	B11	6	-0.547955275626667	0.222315175287315	0.0907597902552204	6.59699556950149
6	1	2	B11	6	0.275336622132267	0.271590507061901	0.110876360214235	11.5586222192614
6	1	3	B11	3	0.258297317143667	0.0761724875418869	0.0439782061871518	15.8022274082233
6	1	4	B11	4	0.389241629858525	0.262290776774437	0.131145388387219	20.3959173197292
6	1	5	B11	3	0.3090321428621	0.340996036403643	0.196874153410238	24.1534531630737
6	1	6	B11	3	0.256372420576	0.065526034045995	0.0378314733953838	27.7408538984408
6	1	7	B11	3	0.204475293386	0.0777462842722334	0.0448868381530671	31.9527896884279
6	1	8	B11	3	0.300439529192	0.174394164108081	0.1006865175929	36.552419619412
6	1	9	B11	4	0.1463500318025	0.151903812579185	0.0759519062895927	41.1000278342879
6	1	10	B11	4	0.171820836531875	0.108931105956553	0.0544655529782763	45.7782207022155
6	1	11	B11	4	0.017863082452	0.055233181265792	0.027616590632896	50.6351530171359
6	1	0	B11	0	-0.547955275626667	0	0	0
10	2	1	B11	4	-0.3415065081125	0.176264941083432	0.088132470541716	5.98746149878933
10	2	2	B11	3	0.173229331733667	0.107073921572836	0.0618191574432659	10.4812477147473
10	2	3	B11	3	0.375673553742	0.441105940464696	0.254672633468435	14.3928702691012
10	2	4	B11	3	0.131740522750933	0.074946005918044	0.04327009669147	18.7378653167189
10	2	5	B11	3	0.1408716476633	0.0894500849483865	0.0516440306239859	22.9623750499395
10	2	6	B11	3	0.0281731286555667	0.224556751958847	0.129647901191788	27.9481772421343
10	2	7	B11	4	0.1906842136835	0.168850920406957	0.0844254602034785	33.3032361668887
10	2	8	B11	4	0.263511417421175	0.244659825663233	0.122329912831617	38.2811714151688
10	2	9	B11	3	0.256906303518	0.207334823754934	0.119704816307295	43.3889555980388
10	2	10	B11	4	0.243156292143	0.090711970558115	0.0453559852790575	48.1823794781621
10	2	11	B11	3	0.124595133087	0.218307868233336	0.12604010649073	52.9905090041965
10	2	0	B11	0	-0.3415065081125	0	0	0
19	4	1	B11	3	-0.962779480887667	0.150929197638062	0.0871390128849091	5.72656290632692
19	4	2	B11	4	0.1960540602636	0.116699912018953	0.0583499560094763	11.4548177848832
19	4	3	B11	3	0.39746702325	0.0987896116557096	0.0570362088825625	16.8930517530442
19	4	4	B11	4	0.175933497539	0.237941167735109	0.118970583867554	22.4524709124085
19	4	5	B11	3	0.256650028696667	0.0154711959186998	0.00893229912834679	26.8338198640141
19	4	6	B11	3	0.195973839403267	0.109145196840744	0.063015008776758	32.2682099914008
19	4	7	B11	3	0.130059975429733	0.0732790195733346	0.0423076616766166	36.4591511544597
19	4	8	B11	3	0.303128900241467	0.278406737158762	0.160738204642817	40.2595825300261
19	4	9	B11	4	0.326785643547975	0.295502723500477	0.147751361750238	45.3492229161491
19	4	10	B11	4	0.36061747779325	0.125473151741822	0.0627365758709111	50.7538134727343
19	4	11	B11	4	0.41783891708475	0.158631418154509	0.0793157090772545	55.3014568071748
19	4	0	B11	0	-0.962779480887667	0	0	0
24	5	1	B11	3	-0.479070948487333	0.116151798441409	0.0670602720970065	4.74001943724699
24	5	2	B11	3	-0.0939918885085333	0.163198102073109	0.0942224681631453	9.59634647422897
24	5	3	B11	6	0.0346779419091833	0.300874319554354	0.122831426602543	15.2632373516822
24	5	4	B11	3	0.423538689157	0.104497881727242	0.0603318801449686	20.5734651018485
24	5	5	B11	4	0.191240736766825	0.164957943915504	0.0824789719577518	25.5103626915624
24	5	6	B11	3	0.281804054704333	0.0944659635062744	0.0545399494596049	29.9334100528625
24	5	7	B11	4	0.216594305558	0.357007007522579	0.17850350376129	34.8804349510074
24	5	8	B11	3	0.576990696903333	0.119208968796134	0.0688253302242656	39.565802768222
24	5	9	B11	3	0.302653275164267	0.282889819466302	0.163326513419874	43.3827250593736
24	5	10	B11	3	0.671483559714333	0.0276033347501769	0.015936792748546	47.656526499917
24	5	11	B11	3	0.675123471356333	0.104809601796447	0.0605118518108361	51.9130031800222
24	5	0	B11	0	-0.479070948487333	0	0	0
242	50	1	B11	8	-0.360381017930496	0.346167508457425	0.122388696328348	6.92067712051087
242	50	2	B11	8	-0.427684615581069	0.355111785936968	0.125550975957648	13.826569650704
242	50	3	B11	8	-0.361331221506226	0.34732077738322	0.122796438467329	20.4916919183318
242	50	4	B11	8	-0.416043124801119	0.352303367561004	0.124558050118621	27.3188463906474
242	50	5	B11	8	-0.33734009207208	0.30350767274705	0.107306166770793	34.198927138381
242	50	6	B11	8	-0.324324073882772	0.353785753837249	0.125082152812757	40.9585225261543
242	50	7	B11	8	-0.427018205150146	0.378726185026908	0.133899926822719	47.8005821441804
242	50	8	B11	8	-0.379204936301008	0.33935659462143	0.119980674648594	54.5622545951111
242	50	9	B11	8	-0.420916744408478	0.308307706461405	0.109003234965465	61.4299068612159
242	50	10	B11	8	-0.412107392204781	0.361663339017207	0.127867299762818	68.4813066560612
242	50	11	B11	8	-0.450227286288974	0.351281609702395	0.124196804163345	75.4709339474849
242	50	0	B11	0	-0.360381017930496	0	0	0
33	7	1	B11	4	-0.38489945547375	0.126179778096837	0.0630898890484186	5.98649887728147
33	7	2	B11	3	0.1141434543392	0.203632660366702	0.117567371278515	10.6828849377523
33	7	3	B11	4	0.2524996820015	0.0824177568300294	0.0412088784150147	15.7909856644306
33	7	4	B11	3	0.205455884969333	0.168975353048176	0.0975579655687767	20.0430062490496
33	7	5	B11	4	0.3619261631675	0.271371942376631	0.135685971188316	25.1383579344662
33	7	6	B11	3	0.268790923744667	0.0805317175121642	0.0464950087839509	30.63376392507
33	7	7	B11	3	0.188788613649433	0.0971696841075702	0.0561009432765765	34.8091225776858
33	7	8	B11	3	0.372004726088833	0.38027759590056	0.219553372359972	38.7944464493384
33	7	9	B11	3	0.429262233340667	0.523866404721507	0.302454409785364	42.6688476067614
33	7	10	B11	4	0.3929612226035	0.168326153746093	0.0841630768730464	47.1200375696534
33	7	11	B11	3	0.290967063033	0.0215236589399834	0.0124266902829451	51.3738139496641
33	7	0	B11	0	-0.38489945547375	0	0	0
6	1	1	B12	6	-0.755103993751333	0.143455886711437	0.0585656205069218	6.48475110128364
6	1	2	B12	6	0.1147593091648	0.125073997265477	0.0510612455651128	11.6218744776337
6	1	3	B12	3	0.0619832509485067	0.163031681108631	0.0941263849745052	15.9140878664601
6	1	4	B12	4	-0.56092314058625	0.219474058618913	0.109737029309457	23.2278691508304
6	1	5	B12	3	0.183022628318733	0.25989207715837	0.150048760707636	26.8234939582074
6	1	6	B12	3	0.0380807424831467	0.127178987701982	0.0734268227850035	31.0762971404862
6	1	7	B12	3	0.206023359368333	0.0752178357784313	0.0434270377345384	34.8526414619299
6	1	8	B12	3	0.351550279570667	0.174122006954515	0.100529387587027	39.1847364141785
6	1	9	B12	4	0.41394754159935	0.230462548623994	0.115231274311997	43.8232912899277
6	1	10	B12	4	0.1555602771923	0.188731440462935	0.0943657202314677	48.1558936196662
6	1	11	B12	4	0.162762146006075	0.184484862171344	0.0922424310856719	52.8781525249557
6	1	0	B12	0	-0.755103993751333	0	0	0
10	2	1	B12	4	-0.6520208943845	0.202345510607016	0.101172755303508	5.96003176129312
10	2	2	B12	3	-0.362870247513633	0.242055559267905	0.139750842302171	10.6958434899299
10	2	3	B12	3	-0.132176481542433	0.161312590759019	0.0931338676983953	14.9826769546739
10	2	4	B12	3	-0.375416410001667	0.172673801275285	0.099693265648282	19.8688053754173
10	2	5	B12	3	0.13522900127515	0.196095170879239	0.113215599693914	23.9190486623815
10	2	6	B12	3	0.195745602242433	0.256264895839911	0.147954606597024	29.4064947015012
10	2	7	B12	4	0.05592235728045	0.209496933467275	0.104748466733637	34.4870894014944
10	2	8	B12	4	0.15547645549385	0.17552585907472	0.0877629295373599	38.9044424380633
10	2	9	B12	3	0.297653177927333	0.208208096060723	0.120209000308118	43.2625132059494
10	2	10	B12	4	0.19962931975625	0.0739955760051912	0.0369977880025956	47.4395599557976
10	2	11	B12	3	0.301867539362667	0.243245951440027	0.140438115543186	51.904292964579
10	2	0	B12	0	-0.6520208943845	0	0	0
19	4	1	B12	3	-1.115669412409	0.186418632643663	0.107628847738781	5.61377731915159
19	4	2	B12	4	0.115266996057875	0.090355252896187	0.0451776264480935	11.1109038402173
19	4	3	B12	3	-0.402207379825667	0.241977627261819	0.139705848237478	17.0781340870223
19	4	4	B12	4	0.27587657796525	0.0932187685164408	0.0466093842582204	21.9678326064109
19	4	5	B12	3	0.026209710043	0.140446237754975	0.0810866731745048	26.3952640103611
19	4	6	B12	3	-0.370275192931667	0.160197807667052	0.0924902473801604	33.0446248724264
19	4	7	B12	3	0.0213290448722026	0.145153258893246	0.0838042730957672	37.4591100245468
19	4	8	B12	3	0.119293581788267	0.11120500908933	0.0642042419329596	41.259023966844
19	4	9	B12	4	0.303918545572225	0.222090303984735	0.111045151992367	45.9374783442676
19	4	10	B12	4	0.158799855934567	0.305539130014372	0.152769565007186	50.7273634337613
19	4	11	B12	4	0.128289263071645	0.105641224813974	0.0528206124069872	55.1419433768013
19	4	0	B12	0	-1.115669412409	0	0	0
24	5	1	B12	3	-0.692442448286	0.0932132216614632	0.0538166786182781	5.33172111021359
24	5	2	B12	3	-0.405254512669	0.0515258911101935	0.0297484871027056	10.3654255277034
24	5	3	B12	6	-0.658423688093	0.208708918560045	0.0852050592067002	16.9302020630817
24	5	4	B12	3	-0.372291986890667	0.210387130738815	0.121467066566088	23.0626660443646
24	5	5	B12	4	-0.076663882247895	0.167199266113619	0.0835996330568093	28.4479112773324
24	5	6	B12	3	-0.1001784831616	0.234186953532955	0.13520790066295	32.9343196537682
24	5	7	B12	4	0.5737136139075	0.126119138350444	0.0630595691752222	37.6723303593362
24	5	8	B12	3	0.276515837573733	0.252199442075554	0.145607415771794	42.1137433858203
24	5	9	B12	3	0.0983136594178667	0.122378694984546	0.0706553724924029	45.7835045293462
24	5	10	B12	3	0.484115848215	0.113174005269431	0.0653410424075744	50.2580921761307
24	5	11	B12	3	0.2301241351989	0.244238052121898	0.141010905138928	54.6235746286326
24	5	0	B12	0	-0.692442448286	0	0	0
242	50	1	B12	8	-0.303099591655757	0.276641011394485	0.0978073675556726	6.86722332915646
242	50	2	B12	8	-0.382651105000163	0.323840928167655	0.114495058166547	13.7230311273541
242	50	3	B12	8	-0.314867776089395	0.270793459180598	0.0957399456437819	20.3876873256288
242	50	4	B12	8	-0.26777002855478	0.308801248465433	0.10917772841439	27.1189516561679
242	50	5	B12	8	-0.241771784754273	0.180690270850681	0.0638836579064751	33.9098503493872
242	50	6	B12	8	-0.304958273418881	0.250234174970981	0.088471141003301	40.7775807126675
242	50	7	B12	8	-0.289412231859673	0.357002054815923	0.126219286928935	47.6500280861534
242	50	8	B12	8	-0.234698236726059	0.256375741038996	0.0906425125102002	54.6168354999164
242	50	9	B12	8	-0.290900898953889	0.214822429629085	0.075951198370848	61.3113343957152
242	50	10	B12	8	-0.201805828889112	0.191131086456919	0.0675750436646198	68.3577416040522
242	50	11	B12	8	-0.4347970408001	0.278389947677991	0.0984257099086378	75.27778424218
242	50	0	B12	0	-0.303099591655757	0	0	0
33	7	1	B12	4	-0.70992829643175	0.101773305962023	0.0508866529810117	6.10521343009507
33	7	2	B12	3	-0.884426912832667	0.127477062433798	0.0735989163116557	11.5928259196703
33	7	3	B12	4	-0.7985193292575	0.114321049247691	0.0571605246238454	17.7419410808107
33	7	4	B12	3	-1.08183008712567	0.221300846328123	0.127768103199434	23.5731640450026
33	7	5	B12	4	-0.348958366142	0.0799463519498771	0.0399731759749385	29.4637736053789
33	7	6	B12	3	-0.686087422614667	0.0424890574499515	0.024531068756343	35.437117516368
33	7	7	B12	3	-0.879735811390333	0.225741324815999	0.13033181464974	40.6007132999711
33	7	8	B12	3	-0.757583558033667	0.0995941975614057	0.0575007367718023	45.6038647194726
33	7	9	B12	3	-0.593500877203667	0.119125740846487	0.068777278545133	50.2525240238876
33	7	10	B12	4	-0.699214555838	0.192268764413038	0.0961343822065189	56.0534770795779
33	7	11	B12	3	-0.985971279162667	0.228563387434335	0.131961133262106	61.2984917945239
33	7	0	B12	0	-0.70992829643175	0	0	0
6	1	1	B2	6	-0.655285913139833	0.221773472044976	0.0905386408325966	6.53650201626048
6	1	2	B2	6	0.0273209465205333	0.219648124177998	0.0896709711992621	11.6818705025445
6	1	3	B2	3	-0.0167995021671333	0.0953460810721942	0.0550480855732072	16.6788077025651
6	1	4	B2	4	0.0068030581923	0.136459781593231	0.0682298907966156	21.9400324899868
6	1	5	B2	3	0.267079086151567	0.16174853598516	0.0933855607920598	26.2023416654395
6	1	6	B2	3	0.22155946808	0.039685068438785	0.0229121849459412	30.1740054659859
6	1	7	B2	3	0.186075792045	0.0708180978894576	0.0408868478799756	34.5697620188247
6	1	8	B2	3	0.163133363032767	0.14607681263199	0.0843374870954418	38.9422412006444
6	1	9	B2	4	0.0526757355665625	0.137280996035486	0.0686404980177432	43.9224068074511
6	1	10	B2	4	0.30186449955075	0.108929241909594	0.0544646209547968	48.1644823455499
6	1	11	B2	4	0.14075655289625	0.176385462759097	0.0881927313795483	53.1856101987023
6	1	0	B2	0	-0.655285913139833	0	0	0
10	2	1	B2	4	-0.41283705155725	0.231514005634359	0.11575700281718	5.75394112061896
10	2	2	B2	3	-0.0775567147399333	0.109831759836711	0.0634113961072956	11.0295691303339
10	2	3	B2	3	-0.155285588864867	0.310416912820149	0.179219288177725	16.0391766353798
10	2	4	B2	3	0.1350309341421	0.0686604593980464	0.0396411347161455	20.8186793802854
10	2	5	B2	3	-0.350183081666833	0.241717572571098	0.139555705591786	27.0328421439984
10	2	6	B2	3	0.237624299648667	0.0212764160540286	0.0122839445361839	31.5252451475957
10	2	7	B2	4	0.07698321828213	0.110516245020275	0.0552581225101376	36.4621869593742
10	2	8	B2	4	0.18235805704465	0.155306961246066	0.0776534806230329	41.0023681708543
10	2	9	B2	3	0.215283676955667	0.120882668848311	0.0697916413999326	45.331601595395
10	2	10	B2	4	0.43394504711875	0.0737988906660725	0.0368994453330362	49.5118514856873
10	2	11	B2	3	0.151217410577367	0.0587010058368594	0.0338910415216125	54.1592109347224
10	2	0	B2	0	-0.41283705155725	0	0	0
19	4	1	B2	3	-0.629647429797	0.274957905777176	0.158747020916269	5.81020828079092
19	4	2	B2	4	-0.088389305814925	0.212966394602881	0.106483197301441	11.7766067101527
19	4	3	B2	3	-0.519721155366	0.0896866211236365	0.0517805948484395	17.7010680353328
19	4	4	B2	4	0.349796892096	0.100174883392949	0.0500874416964746	22.8483728133108
19	4	5	B2	3	0.0563675004543333	0.181939920476222	0.105043062063286	27.8097351651376
19	4	6	B2	3	0.0324029419645	0.171903161953342	0.0992483368283099	32.5936392720772
19	4	7	B2	3	0.235832671768	0.0582118627288594	0.0336086346165365	37.0907496833166
19	4	8	B2	3	0.130803582283	0.0200092592844968	0.0115523512341893	41.2429001991512
19	4	9	B2	4	0.2694052789588	0.377409193634082	0.188704596817041	45.3672006837013
19	4	10	B2	4	0.244844395127025	0.212991120994541	0.10649556049727	50.3008262622406
19	4	11	B2	4	0.23891954743355	0.208988989361515	0.104494494680758	54.7797926123299
19	4	0	B2	0	-0.629647429797	0	0	0
24	5	1	B2	3	-0.660299860443333	0.410289454557946	0.236880727034695	5.83241117733236
24	5	2	B2	3	-0.6937081516	0.0371325117841226	0.0214384656742501	11.2409321191382
24	5	3	B2	6	-0.629408173136	0.124130615779059	0.0506761116860273	17.0346397555027
24	5	4	B2	3	-0.653848092397667	0.169008618495588	0.0975771713837945	22.5063479607173
24	5	5	B2	4	-0.58362029802225	0.194209254440318	0.097104627220159	28.4535390380462
24	5	6	B2	3	-0.812836167674667	0.162525924395203	0.0938343861998633	34.1495636289727
24	5	7	B2	4	-0.28689920807025	0.112969894642995	0.0564849473214974	39.9413639639666
24	5	8	B2	3	-0.740491614287333	0.140921990634597	0.0813613492276227	45.5783968176296
24	5	9	B2	3	-0.575748528155	0.11331066964229	0.0654199456200326	50.5930425175795
24	5	10	B2	3	-0.847185370325333	0.121016558858136	0.069868942833147	56.534797319115
24	5	11	B2	3	-0.736545142232333	0.145322321120603	0.0839018812182413	62.1694972598467
24	5	0	B2	0	-0.660299860443333	0	0	0
242	50	1	B2	8	-1.06574894318203	0.423436797043585	0.149707515296715	8.47900990627361
242	50	2	B2	8	-0.898229872397604	0.384377705451696	0.13589804103091	15.50106118456
242	50	3	B2	8	-0.741159057161831	0.321526814941096	0.113676895589081	22.2850736503437
242	50	4	B2	8	-0.852679390988776	0.37001158496748	0.130818850424044	29.1674304428728
242	50	5	B2	8	-0.808421910614371	0.337751329179732	0.119413127608879	36.0045788451511
242	50	6	B2	8	-0.78593663461222	0.371419057399491	0.131316467074548	42.6654876402881
242	50	7	B2	8	-0.856484056379719	0.366944580877711	0.129734500729142	49.6122070527878
242	50	8	B2	8	-0.821152136850696	0.392282052844444	0.138692649852043	56.4137237384652
242	50	9	B2	8	-0.757312529007691	0.306599612982122	0.108399332724415	63.1999367735962
242	50	10	B2	8	-0.846075314633899	0.361686406241019	0.127875455258009	70.0216503129665
242	50	11	B2	8	-0.870032393685655	0.343550674615343	0.121463505850861	76.8629237821013
242	50	0	B2	0	-1.06574894318203	0	0	0
33	7	1	B2	4	-0.58809338581075	0.168659178994038	0.0843295894970192	5.78424752950276
33	7	2	B2	3	-0.792616994438	0.102388262012771	0.0591138906349314	11.0962524666836
33	7	3	B2	4	-0.549201348974	0.157147890774631	0.0785739453873154	16.7142504845565
33	7	4	B2	3	-0.613099443213667	0.21536512164875	0.124341110957962	22.2381121144235
33	7	5	B2	4	-0.37910849144	0.127807869358472	0.0639039346792362	27.9828827141703
33	7	6	B2	3	-0.777688388873333	0.139161270707081	0.0803447971035039	33.5019386876982
33	7	7	B2	3	-0.695494841568	0.112941060933028	0.0652065519322454	39.2802261321212
33	7	8	B2	3	-0.823916689620333	0.0435709236288807	0.0251556844859749	44.6136002376877
33	7	9	B2	3	-0.767394649389333	0.0484366724205582	0.027964925860659	49.8582360440707
33	7	10	B2	4	-0.54406985649525	0.171037325771073	0.0855186628855364	55.6280745392989
33	7	11	B2	3	-0.674163909276	0.136107607814345	0.0785817640103681	61.1982478038473
33	7	0	B2	0	-0.58809338581075	0	0	0
6	1	1	B3	6	-0.581046953652333	0.269283975961845	0.109934722835735	6.64823916314909
6	1	2	B3	6	0.15359405112054	0.168443222919655	0.0687666577971726	11.8437577435531
6	1	3	B3	3	-0.174974565352167	0.149773575832031	0.0864718143241161	18.1016884859866
6	1	4	B3	4	0.1877613592379	0.0909559524368164	0.0454779762184082	23.3399045908782
6	1	5	B3	3	0.269528120300667	0.181861314117385	0.104997678660851	27.3517044911878
6	1	6	B3	3	0.00147605868160001	0.278208979303404	0.160624029091791	32.005127428337
6	1	7	B3	3	0.289042622536667	0.129841704015175	0.0749641427652007	36.5327296331878
6	1	8	B3	3	0.15652378780284	0.152498890987627	0.0880452757628258	40.9145831091941
6	1	9	B3	4	0.229789542264975	0.136075200960732	0.0680376004803661	45.8928913802577
6	1	10	B3	4	0.3062942994185	0.148917465260392	0.0744587326301959	50.2596217772974
6	1	11	B3	4	0.202904195170125	0.0899747516062488	0.0449873758031244	55.2644154481242
6	1	0	B3	0	-0.581046953652333	0	0	0
10	2	1	B3	4	-0.48001112936375	0.240357894075964	0.120178947037982	6.12136162578873
10	2	2	B3	3	0.118998505573333	0.198866156314077	0.114815428880639	11.3958487245515
10	2	3	B3	3	0.138891785866067	0.153126229045867	0.0884074695596234	15.9997963039705
10	2	4	B3	3	0.240648707343567	0.134438246528092	0.077617957822375	20.9725471025927
10	2	5	B3	3	-0.181262032323033	0.139350634264886	0.0804541262045772	27.121066653289
10	2	6	B3	3	0.157085406368967	0.0985237231475724	0.0568826980808151	31.8753110925648
10	2	7	B3	4	0.076931726189825	0.128412332234252	0.0642061661171258	37.1029688750425
10	2	8	B3	4	0.218098196161425	0.241850728614102	0.120925364307051	41.6858424664671
10	2	9	B3	3	0.165709041384933	0.124034599380234	0.0716114093410052	46.1612024551807
10	2	10	B3	4	0.382205283704	0.111306714277573	0.0556533571387867	50.212216828215
10	2	11	B3	3	0.280961946690667	0.0640207686390695	0.0369624080074935	54.661893471339
10	2	0	B3	0	-0.48001112936375	0	0	0
19	4	1	B3	3	-0.517171988395	0.262335466618295	0.151459452270059	6.15144726909041
19	4	2	B3	4	0.11092469858975	0.196524787525654	0.0982623937628269	12.1869810458401
19	4	3	B3	3	0.106278947558067	0.0304860842488155	0.0176011489475912	17.1842441781853
19	4	4	B3	4	0.416104355529	0.156140212748725	0.0780701063743624	22.0928648935282
19	4	5	B3	3	0.250803519576467	0.165934949729701	0.09580258789441	26.684739543981
19	4	6	B3	3	0.322459053228667	0.183765803217693	0.106097235955583	31.1399993364479
19	4	7	B3	3	0.144834970188133	0.149033939033716	0.0860447848195062	35.983585208886
19	4	8	B3	3	0.265066217155667	0.0563238475018508	0.032518588516989	39.9520036115899
19	4	9	B3	4	0.24677132364835	0.208972718287111	0.104486359143555	44.9608770319798
19	4	10	B3	4	0.014451488416625	0.222723466995189	0.111361733497594	50.2120136829812
19	4	11	B3	4	0.2512715019075	0.115767552702455	0.0578837763512273	54.8729789919318
19	4	0	B3	0	-0.517171988395	0	0	0
24	5	1	B3	3	-0.550223811988667	0.0427805272309726	0.0246993489128762	5.68535788429741
24	5	2	B3	3	-0.698019919479667	0.164264339679353	0.0948380607321305	11.4367361329086
24	5	3	B3	6	-0.590499644302667	0.224271973751626	0.0915586498830577	17.4922578612069
24	5	4	B3	3	-0.803191476531667	0.114386829212282	0.0660412666374587	23.4403946113895
24	5	5	B3	4	-0.4588157182675	0.0995170904618866	0.0497585452309433	29.3966229198259
24	5	6	B3	3	-0.688346631929667	0.154559783836329	0.0892351328037947	35.4933500289899
24	5	7	B3	4	-0.36653674302125	0.101187201951632	0.0505936009758162	41.7976705963544
24	5	8	B3	3	-0.668845491301	0.0431016311055407	0.0248847383212958	47.6055461873125
24	5	9	B3	3	-0.669245979668	0.237284646082099	0.136996354290065	53.2714970791036
24	5	10	B3	3	-0.668125802899	0.0625248085082831	0.0360987150232871	59.1234744304338
24	5	11	B3	3	-0.684939623157667	0.0869493030442696	0.0502002035184594	65.0472455664794
24	5	0	B3	0	-0.550223811988667	0	0	0
242	50	1	B3	8	-0.915724635229381	0.427552815448144	0.151162747559392	8.48852647650546
242	50	2	B3	8	-0.589455511770609	0.296384131548236	0.104787614626922	15.096456900887
242	50	3	B3	8	-0.446273619286347	0.31744877404061	0.112235090401736	21.6109361915151
242	50	4	B3	8	-0.555384771100939	0.32292710824722	0.114171974035286	28.1437373419408
242	50	5	B3	8	-0.580384948634549	0.347907013340272	0.123003704177632	34.8148305305929
242	50	6	B3	8	-0.556658065461758	0.321388156574378	0.113627872453393	41.171459297363
242	50	7	B3	8	-0.552163669922148	0.329751779289227	0.116584859621871	47.6902755218193
242	50	8	B3	8	-0.547219082901513	0.328802249931539	0.116249150297992	54.1761220808148
242	50	9	B3	8	-0.514497730610659	0.340936646043922	0.120539307186328	60.6322629771305
242	50	10	B3	8	-0.625193765226563	0.310977872516351	0.109947281227639	67.4062069897937
242	50	11	B3	8	-0.573213168397572	0.297743708132539	0.105268297538073	73.9358999521103
242	50	0	B3	0	-0.915724635229381	0	0	0
33	7	1	B3	4	-0.493260730373	0.154863154870782	0.0774315774353908	5.94048390720193
33	7	2	B3	3	-0.662844004138	0.1372557187959	0.0792446261946284	11.5221786362589
33	7	3	B3	4	-0.516024522719	0.142901534551591	0.0714507672757953	17.4116601069411
33	7	4	B3	3	-0.501225190323	0.156444933261295	0.0903235243317616	23.307368153427
33	7	5	B3	4	-0.43837944509925	0.089923204587533	0.0449616022937665	29.5882730176823
33	7	6	B3	3	-0.662875075165667	0.107866694466965	0.0622768650870974	35.363209206547
33	7	7	B3	3	-0.669935376168	0.169090897721735	0.0976246753171592	41.6385971133021
33	7	8	B3	3	-0.806161313811	0.0781885284952682	0.0451421679742838	47.3928549330268
33	7	9	B3	3	-0.675309719231	0.149579808518884	0.0863599427137101	52.8874948682817
33	7	10	B3	4	-0.47782638692725	0.10560967506438	0.0528048375321899	58.7784807519443
33	7	11	B3	3	-0.498688195068333	0.232851033256602	0.134436606731781	64.6040614760838
33	7	0	B3	0	-0.493260730373	0	0	0
6	1	1	B4	6	-0.6114746147755	0.274263722468209	0.111967695833902	6.94417987745458
6	1	2	B4	6	0.2930090069565	0.116950446738702	0.04774481995006	11.7687166706994
6	1	3	B4	3	0.441566102514333	0.234480884813404	0.13537760196684	16.4241204247094
6	1	4	B4	4	0.098146850328375	0.151914596196997	0.0759572980984984	21.910711675245
6	1	5	B4	3	0.0966863614546667	0.074155348661041	0.0428136105113026	26.6350822075861
6	1	6	B4	3	0.00201080914390002	0.310892791063875	0.179494036609843	31.5885735916033
6	1	7	B4	3	0.265556734288667	0.11892913548308	0.0686637683856455	36.2529070714848
6	1	8	B4	3	0.123035015135867	0.191885224058776	0.110784985763846	41.1409031136201
6	1	9	B4	4	0.20471599884595	0.107354238124068	0.0536771190620342	46.241197922833
6	1	10	B4	4	0.5400944321	0.182988547748334	0.0914942738741669	50.4714190983874
6	1	11	B4	4	0.28612366040225	0.14570542727839	0.0728527136391951	55.2277349690739
6	1	0	B4	0	-0.6114746147755	0	0	0
10	2	1	B4	4	-0.47023382713	0.143099531512553	0.0715497657562763	6.42981583574629
10	2	2	B4	3	-0.0430224266887067	0.0966318559341371	0.0557904280358672	12.2353620233344
10	2	3	B4	3	0.0998710561335667	0.058411280524512	0.0337237685345377	17.0163813492696
10	2	4	B4	3	0.212288992470967	0.2016916396472	0.116446722443608	21.898807288471
10	2	5	B4	2	-0.321406625815	0.297943275737614	0.210677710683	27.7027517912751
10	2	6	B4	3	0.0849660133638667	0.210488239928901	0.121525441984201	32.6567477454316
10	2	7	B4	4	0.212064143162775	0.151765999264726	0.0758829996323629	37.7232093098695
10	2	8	B4	4	0.29283588201525	0.0783907641221694	0.0391953820610847	42.4646446516847
10	2	9	B4	3	0.107565714759667	0.200113413712187	0.115535533275186	47.4083753889307
10	2	10	B4	4	0.4322933669285	0.125247160671473	0.0626235803357365	51.778123738859
10	2	11	B4	3	0.310949991878	0.0267649558672447	0.0154527544748022	56.7441096697188
10	2	0	B4	0	-0.47023382713	0	0	0
19	4	1	B4	3	-0.665709835576	0.0890805867771466	0.0514307007553554	6.43256114727315
19	4	2	B4	4	-0.30853723232925	0.061470693265548	0.030735346632774	12.6280963386845
19	4	3	B4	3	-0.68240373989	0.0467835843870535	0.0270105150395209	18.7341611868416
19	4	4	B4	4	-0.43443613609775	0.0950660002226035	0.0475330001113017	25.0532213997735
19	4	5	B4	3	-0.581916931919	0.192618983465492	0.111208621954834	31.1820888726537
19	4	6	B4	3	-0.539968486499333	0.070863569541326	0.0409131009504223	37.3342426045874
19	4	7	B4	3	-0.773535500108	0.0501927841985005	0.0289788174683811	43.5756948976046
19	4	8	B4	3	-0.817753445348	0.14781964352854	0.0853437109827172	49.4273174532558
19	4	9	B4	4	-0.63954593716975	0.193563474398417	0.0967817371992086	56.1523152170466
19	4	10	B4	4	-0.5006848070445	0.222368805831145	0.111184402915572	62.7336419379159
19	4	11	B4	4	-0.529409092413	0.1247426359617	0.06237131798085	68.928277834939
19	4	0	B4	0	-0.665709835576	0	0	0
24	5	1	B4	3	-0.596087787822333	0.101021005767294	0.058324504873554	5.96318787196373
24	5	2	B4	3	-0.633350061754333	0.119119570245962	0.0687737159472587	11.6314567630053
24	5	3	B4	6	-0.627202693734833	0.210901629393429	0.0861002296559104	17.839360384067
24	5	4	B4	3	-0.654342122584333	0.05387816157825	0.0311065710906448	24.0026703602998
24	5	5	B4	4	-0.6140854712015	0.121521783292639	0.0607608916463196	30.3704680139549
24	5	6	B4	3	-0.565627610244333	0.19694813732809	0.113708060102768	36.4958985419149
24	5	7	B4	4	-0.591130778573	0.291480429798118	0.145740214899059	43.0969389643961
24	5	8	B4	3	-0.829747967067	0.0394957248557605	0.0228028673773127	49.7437076517955
24	5	9	B4	3	-0.715251298672667	0.170195737411674	0.098262554809557	55.3472191893645
24	5	10	B4	3	-0.64660610597	0.0843633172154924	0.0487071839040943	61.6233738898493
24	5	11	B4	3	-0.635482461584333	0.0744683560285254	0.042994325399178	67.9281164695928
24	5	0	B4	0	-0.596087787822333	0	0	0
242	50	1	B4	8	-0.811787460001558	0.45989988990506	0.162599165409407	8.16892340230467
242	50	2	B4	8	-0.605052243720898	0.33971232923237	0.120106445826443	14.6683042776748
242	50	3	B4	8	-0.542658394506327	0.377115873563094	0.133330595744776	21.1589724546884
242	50	4	B4	8	-0.631444711709714	0.359650814366056	0.127155764848751	27.7372000558038
242	50	5	B4	8	-0.561608526961961	0.351746676335376	0.124361230048287	34.1514808480969
242	50	6	B4	8	-0.53424777886984	0.336808110240283	0.119079649354765	40.5814610472514
242	50	7	B4	8	-0.594676004886346	0.330608249756282	0.116887667659442	47.094202669646
242	50	8	B4	8	-0.522099588343146	0.383824167502556	0.135702335812169	53.6540655488292
242	50	9	B4	8	-0.5809425933375	0.375347785167933	0.132705482097799	60.1692048231838
242	50	10	B4	8	-0.551619523648255	0.370561426779109	0.131013248860835	66.7537369476647
242	50	11	B4	8	-0.694357525932926	0.362938825718434	0.128318252410694	73.5485052540681
242	50	0	B4	0	-0.811787460001558	0	0	0
33	7	1	B4	4	-0.5691456856995	0.0722623750583544	0.0361311875291772	6.35153030217096
33	7	2	B4	3	-0.643185812755333	0.106451191115244	0.0614596238459426	12.0011149626863
33	7	3	B4	4	-0.53034677082625	0.0909704402839606	0.0454852201419803	18.0839537707431
33	7	4	B4	3	-0.675157515552	0.147072709743342	0.0849124685607664	24.5339785829174
33	7	5	B4	4	-0.468406200147	0.181806849887514	0.090903424943757	31.0384168014492
33	7	6	B4	3	-0.766589525707	0.0507895967508832	0.029323387356155	37.2645119752346
33	7	7	B4	3	-0.727147402613	0.126074422973207	0.0727891020415076	43.6282446805893
33	7	8	B4	3	-0.879638864563333	0.11518272525234	0.0665007774304331	49.6459555424991
33	7	9	B4	3	-0.624721204469	0.0731463745128366	0.0422310790152314	55.2173043177379
33	7	10	B4	4	-0.59333716792275	0.121290106951094	0.0606450534755468	61.472774465659
33	7	11	B4	3	-0.621829533379	0.102330589612309	0.0590805934589997	67.6562407861167
33	7	0	B4	0	-0.5691456856995	0	0	0
6	1	1	B5	6	-0.670470214019667	0.156512089669605	0.0638957930445432	7.19737964059587
6	1	2	B5	6	0.271747266113833	0.217567971617393	0.0888217524724909	12.3571398097063
6	1	3	B5	3	0.155865237582867	0.117565881507312	0.0678766933357624	17.5168882571305
6	1	4	B5	4	0.1648137892645	0.0932912539522957	0.0466456269761478	23.0970076144689
6	1	5	B5	3	0.172812060082	0.0257199234879242	0.0148494047492896	27.5651966359869
6	1	6	B5	3	0.145958754108467	0.161288625750973	0.0931200314945491	31.9928713926245
6	1	7	B5	3	0.274341334036733	0.174046718514452	0.10048591978589	36.494531154335
6	1	8	B5	3	0.214002552662	0.0792314014051149	0.0457442709295144	41.4354810408702
6	1	9	B5	4	0.25680927570525	0.10431218128656	0.0521560906432801	46.5344149461558
6	1	10	B5	4	0.3465804524865	0.12115637481593	0.0605781874079648	51.008814482086
6	1	11	B5	4	0.2391359009598	0.127250689623835	0.0636253448119177	56.1910615477618
6	1	0	B5	0	-0.670470214019667	0	0	0
10	2	1	B5	4	-0.444358026399	0.245244173392878	0.122622086696439	6.51835320288357
10	2	2	B5	3	0.123454002428567	0.0715335066311883	0.0412998893095944	11.7248819454724
10	2	3	B5	3	0.133569478215333	0.0733271505184719	0.0423354500907479	16.466903507313
10	2	4	B5	3	0.251799674347333	0.0981125041098888	0.0566452806587126	21.2236128417748
10	2	5	B5	3	0.258517208968667	0.0492734852546068	0.0284480599756583	25.9568951398393
10	2	6	B5	3	0.178174127900767	0.143732448738857	0.0829839679706634	30.9125720114045
10	2	7	B5	4	0.063334560164	0.271922573099557	0.135961286549778	36.3260825648597
10	2	8	B5	4	0.2732913236889	0.247477407359757	0.123738703679878	40.9917907845063
10	2	9	B5	3	0.105279863262767	0.121821774964846	0.0703338345691116	46.0030751803697
10	2	10	B5	4	0.32687956174475	0.177620384415295	0.0888101922076476	50.4926353088173
10	2	11	B5	3	0.214298161065267	0.111380271423619	0.0643054296888402	55.3645782820661
10	2	0	B5	0	-0.444358026399	0	0	0
19	4	1	B5	3	-0.757580432679333	0.352614678388106	0.203582179487587	6.61962232839442
19	4	2	B5	4	0.075429389019	0.328796445111611	0.164398222555806	13.0304151991275
19	4	3	B5	3	0.316250714208533	0.195757426065602	0.113020602634844	18.3178680329294
19	4	4	B5	4	0.395939951156	0.140908322081332	0.0704541610406661	23.7176571913819
19	4	5	B5	3	0.252503392365733	0.17314581106196	0.0999657806256785	28.2587203761179
19	4	6	B5	3	0.0498294744692333	0.0699096675524368	0.0403623653803566	33.498598378468
19	4	7	B5	3	0.190983457232667	0.0346959917033074	0.0200317401497056	38.130319168376
19	4	8	B5	3	0.255695771261	0.124366561965522	0.0718030680289826	42.185437532545
19	4	9	B5	4	0.074882501795425	0.113042728762203	0.0565213643811017	47.3445786500292
19	4	10	B5	3	-0.0638047817506667	0.318654840394817	0.183975457880525	52.7657041995682
19	4	11	B5	4	0.29428207576375	0.0806543545078819	0.0403271772539409	57.5948766816966
19	4	0	B5	0	-0.757580432679333	0	0	0
24	5	1	B5	3	-0.587894017906	0.0540005754040515	0.0311772467459238	6.02256814220189
24	5	2	B5	3	-0.1579336846204	0.098857272334245	0.0570752727935285	11.6948902504604
24	5	3	B5	6	-0.633899093030333	0.165183972744215	0.0674360744848552	18.286515550566
24	5	4	B5	3	-0.692729627907667	0.121112710858818	0.0699244562166238	24.7338503638883
24	5	5	B5	4	-0.58647978888225	0.0892296927994691	0.0446148463997346	31.5266966719417
24	5	6	B5	3	-0.737350430381667	0.160952707713351	0.0929260891251023	37.7573811235724
24	5	7	B5	4	-0.545752684822	0.131913828646005	0.0659569143230024	44.5201442239998
24	5	8	B5	3	-0.810787555187333	0.154440666759966	0.0891663605276916	50.9208080325244
24	5	9	B5	3	-0.753735709318333	0.0683028256445253	0.0394346547722788	56.6759467267984
24	5	10	B5	3	-0.697054861468333	0.168130086883189	0.0970699509208843	63.1494298283429
24	5	11	B5	3	-0.595659975701333	0.409094682421388	0.236190925020033	69.0077892126881
24	5	0	B5	0	-0.587894017906	0	0	0
242	50	1	B5	8	-0.621678322457425	0.322899591100761	0.114162245254856	7.26150719264873
242	50	2	B5	8	-0.581256508159301	0.360344419131182	0.127400991165193	14.2817287525563
242	50	3	B5	8	-0.655902336658801	0.358252178462831	0.12666127238296	21.4222531443212
242	50	4	B5	8	-0.595172519621782	0.382650295987768	0.135287309557995	28.4466805044416
242	50	5	B5	8	-0.500240181330743	0.336870620692157	0.119101750136973	35.2458079833753
242	50	6	B5	8	-0.498343736568749	0.341666154489953	0.120797227370888	42.1125647841413
242	50	7	B5	8	-0.556726994093165	0.364246864916153	0.128780714104076	49.1834776021684
242	50	8	B5	8	-0.586927935566647	0.391203815227734	0.13831143528679	56.3890524358918
242	50	9	B5	8	-0.576958065142253	0.33852190745066	0.119685568169283	63.2980275388924
242	50	10	B5	8	-0.538720665512796	0.391103494392582	0.138275966515375	70.2609569839744
242	50	11	B5	8	-0.595611648758491	0.314720719819299	0.111270577582069	77.1066817639737
242	50	0	B5	0	-0.621678322457425	0	0	0
33	7	1	B5	4	-0.66327648572225	0.132538746940097	0.0662693734700483	7.19125274500981
33	7	2	B5	3	-0.808659164879333	0.0738601891715752	0.0426432001006056	13.4393070745946
33	7	3	B5	4	-0.6425051847885	0.130952642976652	0.065476321488326	20.3660132913757
33	7	4	B5	3	-0.683701531325333	0.390653929708247	0.225544151477041	27.0185540282598
33	7	5	B5	4	-0.575194360024	0.222713682618832	0.111356841309416	34.3959828337849
33	7	6	B5	3	-0.740685444889333	0.13119051801574	0.075742880891514	41.3958920475164
33	7	7	B5	3	-0.864215336526333	0.252557188417485	0.14581396071861	48.4029176231106
33	7	8	B5	3	-0.787293351156333	0.10072039169027	0.0581509452552618	54.8596957795305
33	7	9	B5	3	-0.677549496927667	0.053510995566367	0.0308945876948468	61.2071875654875
33	7	10	B5	4	-0.55573251580025	0.103188981614998	0.0515944908074989	68.0832820275966
33	7	11	B5	3	-0.842101107804	0.191053914511011	0.110305028972664	74.9489492044371
33	7	0	B5	0	-0.66327648572225	0	0	0
6	1	1	B6	6	-0.7250703738635	0.189769812717236	0.0774732016234592	7.27846666341294
6	1	2	B6	6	0.01252769150875	0.238906379322774	0.0975331209394338	13.1357961535931
6	1	3	B6	3	-0.0428821351143667	0.211106819897753	0.121882579295734	19.1476519197141
6	1	4	B6	4	-0.021762318241525	0.14636608888192	0.0731830444409602	25.4277844478106
6	1	5	B6	3	0.124406947745867	0.077743064160752	0.0448849790208365	30.3603560643588
6	1	6	B6	3	0.347262049576333	0.161432052216729	0.0932028388031623	34.9969362677883
6	1	7	B6	3	0.352727284866333	0.102491477887544	0.0591734823480164	39.5057465074467
6	1	8	B6	3	0.1611202588594	0.12274386210549	0.0708662018279789	44.8472522380164
6	1	9	B6	4	0.3683997023475	0.124444201318453	0.0622221006592266	50.0248762872852
6	1	10	B6	4	0.4105527565005	0.112427769561669	0.0562138847808347	54.6629520676888
6	1	11	B6	4	0.124632393135475	0.135189204328777	0.0675946021643883	59.9354043229931
6	1	0	B6	0	-0.7250703738635	0	0	0
10	2	1	B6	4	-0.40060868210175	0.183440687371518	0.0917203436857592	6.28791352786717
10	2	2	B6	3	0.1108569002869	0.161842251605365	0.0934396675306125	11.5934828946053
10	2	3	B6	3	0.114663237405	0.24100047546075	0.139141689382092	16.3884268403109
10	2	4	B6	3	0.34007639168	0.107815785417074	0.0622474727334389	21.0865983841621
10	2	5	B6	3	0.156915555404433	0.106774824629062	0.0616464737422638	26.3844383606728
10	2	6	B6	3	0.275398321142	0.0358316012619359	0.020687384634074	31.9445832907872
10	2	7	B6	4	0.2310513108288	0.117470525405331	0.0587352627026657	37.361066884834
10	2	8	B6	4	0.108228441414675	0.094119725902749	0.0470598629513745	41.8493504040445
10	2	9	B6	3	0.196140624833333	0.0889839544898299	0.0513749100782607	47.1337778509886
10	2	10	B6	4	0.3270348668995	0.110703723747762	0.055351861873881	51.8286170600212
10	2	11	B6	3	0.507136855401667	0.0497036194752014	0.0286963980837063	56.5349928483787
10	2	0	B6	0	-0.40060868210175	0	0	0
19	4	1	B6	3	-0.786764745672	0.208035644503405	0.120109435355078	6.59314301464874
19	4	2	B6	4	-0.0316855254683	0.186768127934889	0.0933840639674444	13.1443743330629
19	4	3	B6	3	0.1293068941763	0.105413957523736	0.0608607767526729	19.0829749655549
19	4	4	B6	4	0.26480848791425	0.0936444630472515	0.0468222315236258	25.0692059872735
19	4	5	B6	3	0.278186026349667	0.011923872043895	0.00688425073432542	29.8673010243589
19	4	6	B6	3	0.271875894707767	0.341836854720454	0.197359600091789	35.0929317042156
19	4	7	B6	3	0.2050650497895	0.143233675470667	0.082696001090009	39.7116310142097
19	4	8	B6	3	0.352305980546333	0.0722429465167601	0.0417094846185032	43.8974440968552
19	4	9	B6	4	0.03227606899055	0.222176783397867	0.111088391698934	49.4279804374244
19	4	10	B6	3	0.144447816467667	0.062831177986714	0.0362755975241306	55.193843921889
19	4	11	B6	4	0.21882489179925	0.176247237748608	0.0881236188743042	60.2644308486021
19	4	0	B6	0	-0.786764745672	0	0	0
24	5	1	B6	3	-0.502360204054667	0.0225599873110225	0.0130250147469334	6.07146410216582
24	5	2	B6	3	-0.00100353608803333	0.226814302245311	0.130951298457388	11.6934205963397
24	5	3	B6	6	-0.1251225802263	0.353173521572019	0.144182486418879	18.0222797510812
24	5	4	B6	3	0.387869813711	0.117395644813071	0.067778407134516	23.2924956254979
24	5	5	B6	4	0.19558185913425	0.0558787622231981	0.027939381111599	28.7137943069523
24	5	6	B6	3	0.236036864743667	0.0399515799447949	0.0230660554356782	33.4850058886093
24	5	7	B6	4	-0.05704488653315	0.29415513262857	0.147077566314285	38.9260679580321
24	5	8	B6	3	0.0672370446891767	0.0863035918289867	0.0498274019744971	44.0827260918951
24	5	9	B6	3	0.271988021750333	0.123826480825057	0.0714912520371507	48.2652639174984
24	5	10	B6	3	0.327322061134	0.202091200471354	0.116677408992991	53.4011233007439
24	5	11	B6	3	0.361950462446	0.128411662524743	0.0741385079257477	58.464501116447
24	5	0	B6	0	-0.502360204054667	0	0	0
242	50	1	B6	8	-0.786228096589773	0.323527589019899	0.114384276048453	7.76237102610379
242	50	2	B6	8	-0.711347018564392	0.354010825466275	0.125161727650325	15.1400242541198
242	50	3	B6	8	-0.65082686991119	0.333706760055398	0.117983156481482	22.3779195092162
242	50	4	B6	8	-0.724848623204152	0.347583966190763	0.122889489762602	29.606380282384
242	50	5	B6	8	-0.740861217985313	0.320211631070708	0.113211907872451	36.977134287778
242	50	6	B6	8	-0.728682717130532	0.304299551681581	0.107586138253036	44.1272918957462
242	50	7	B6	8	-0.642297064100368	0.367829805520947	0.130047474903195	51.5225817766618
242	50	8	B6	8	-0.70376088095672	0.326729967480868	0.115516487811291	58.8469486521265
242	50	9	B6	8	-0.731818050056467	0.309695538908637	0.10949390783276	66.1512131029455
242	50	10	B6	8	-0.700773732734824	0.340486248753544	0.1203800676972	73.4536694783532
242	50	11	B6	8	-0.76137576149332	0.297067839912689	0.105029342037351	80.6960291479914
242	50	0	B6	0	-0.786228096589773	0	0	0
33	7	1	B6	4	-0.62861826272625	0.0912509691001107	0.0456254845500554	6.86194516791613
33	7	2	B6	3	-0.489439829466	0.154806587949458	0.0893776252249471	12.8796050058553
33	7	3	B6	4	-0.4501913686565	0.139744211468539	0.0698721057342694	19.4359536324828
33	7	4	B6	3	-0.716980241601333	0.202772119529579	0.117070537794554	25.8386091847462
33	7	5	B6	4	-0.533844862766	0.150371612224701	0.0751858061123506	32.8924596130687
33	7	6	B6	3	-0.737222413260667	0.111510440302912	0.0643805827263398	39.8534768092347
33	7	7	B6	3	-0.863321167575667	0.0952094471145438	0.0549691999209773	46.4480605821587
33	7	8	B6	3	-0.799962047669333	0.118581303663967	0.0684629475912481	52.6414006206661
33	7	9	B6	3	-0.737733461107	0.0405068755033334	0.0233866554758802	58.9389906821709
33	7	10	B6	4	-0.5375064014955	0.172297709910301	0.0861488549551507	65.385019014812
33	7	11	B6	3	-0.803362056239333	0.194968262366748	0.112564978760875	71.9275787155961
33	7	0	B6	0	-0.62861826272625	0	0	0
6	1	9	B7	4	0.33703988875875	0.172362177635641	0.0861810888178205	46.2363999070844
6	1	10	B7	4	0.23606179766635	0.138561742914945	0.0692808714574725	51.3353788449252
6	1	11	B7	4	0.27484277176575	0.10823021459248	0.0541151072962399	56.6546118976812
6	1	1	B7	6	-0.718368140113667	0.179648969350182	0.0733413846208066	7.31480691070448
6	1	2	B7	6	0.3556562113046	0.210510088593789	0.0859403837938108	12.5036828873485
6	1	3	B7	3	0.391040101479	0.191571329034191	0.110603758386904	17.2901715329317
6	1	4	B7	4	0.35298022938725	0.178286677272112	0.089143338636056	23.0100959617279
6	1	5	B7	3	0.215342767532667	0.0748805309031503	0.0432322946739959	27.3988751363005
6	1	6	B7	3	0.323314297551333	0.0834578663057657	0.0481844215776256	31.6500680151975
6	1	7	B7	3	0.353707276605	0.142905440351564	0.0825064944556372	36.1139975993183
6	1	8	B7	3	0.338097175859667	0.186568966754014	0.10771564317786	41.0427074996417
6	1	0	B7	0	-0.718368140113667	0	0	0
10	2	1	B7	4	-0.458511556380775	0.322107574084005	0.161053787042003	7.05053499698007
10	2	2	B7	3	0.164437369598347	0.177344458259701	0.102389870715527	12.3334067416324
10	2	3	B7	3	0.310933209865	0.112732754190594	0.0650862859784271	17.0091700508321
10	2	4	B7	3	0.319745459084	0.146947453206496	0.0848401516655006	21.7132627088968
10	2	5	B7	3	0.289075846972933	0.184051753718509	0.106262329554204	26.5054014372106
10	2	6	B7	3	0.225601759377867	0.145997407821619	0.0842916427067992	31.6470659850125
10	2	7	B7	4	-0.1652309635916	0.345112637580772	0.172556318790386	37.2519263314909
10	2	8	B7	4	0.219484435814375	0.140459572600609	0.0702297863003046	42.4307592551768
10	2	9	B7	3	0.0721907440744333	0.229612782358148	0.132567001703856	47.4979171241303
10	2	10	B7	4	0.41112559767175	0.210548089077894	0.105274044538947	52.2875371622624
10	2	11	B7	3	0.185912005217133	0.137778680353037	0.0795465581904174	57.3388829485988
10	2	0	B7	0	-0.458511556380775	0	0	0
19	4	1	B7	3	-0.808455712549667	0.124599166516485	0.0719373623290956	6.52596732250269
19	4	2	B7	4	0.1335383439733	0.053183135636305	0.0265915678181525	12.9713024068724
19	4	3	B7	3	0.367763397109333	0.105754555318543	0.0610574209811898	18.4090131348945
19	4	4	B7	4	0.49737619804125	0.182318986919987	0.0911594934599933	23.7006587861627
19	4	5	B7	3	0.308969670799333	0.118351908107378	0.0683305060049005	28.328158355526
19	4	6	B7	3	0.2616125259697	0.24605991041557	0.142062755515205	33.3449647634909
19	4	7	B7	3	0.2915197526886	0.200883310971122	0.115980033664881	37.9972469259857
19	4	8	B7	3	0.297914505077667	0.0749426671586681	0.0432681690578456	42.1692891115452
19	4	9	B7	4	-0.11980517147721	0.236668569885604	0.118334284942802	47.9799300398385
19	4	10	B7	4	-0.074698742954675	0.257114223261224	0.128557111630612	53.5636737693646
19	4	11	B7	4	0.299638087004275	0.143415598829574	0.0717077994147869	58.6726164416885
19	4	0	B7	0	-0.808455712549667	0	0	0
24	5	1	B7	3	-0.474367075307667	0.171790153801617	0.0991830915414905	5.85080181859772
24	5	2	B7	3	0.132753426038667	0.040139666513271	0.0231746472666188	11.2635242281543
24	5	3	B7	6	-0.700581832917667	0.164715272127709	0.0672447282594271	18.0212125052122
24	5	4	B7	3	-0.614846686735333	0.169323451517064	0.0977589403134934	24.5739114617534
24	5	5	B7	4	-0.5231902706025	0.178605024395032	0.0893025121975162	31.4353908038995
24	5	6	B7	3	-0.728760379322	0.217951168491351	0.125834165798675	37.9252743139498
24	5	7	B7	4	-0.52484904005425	0.293264850903999	0.146632425452	44.8907715854158
24	5	8	B7	3	-0.744450451268	0.103670109938916	0.0598539658801514	52.0207692728992
24	5	9	B7	3	-0.512382366953667	0.0220177067252842	0.012711928904781	57.8640037385312
24	5	10	B7	3	-0.607097620798333	0.072413586052064	0.0418080034001453	64.3761867722498
24	5	11	B7	3	-0.634061704695333	0.141505956409716	0.0816985020250852	70.8722759720779
24	5	0	B7	0	-0.474367075307667	0	0	0
242	50	1	B7	8	-0.780553475955195	0.421784399112505	0.149123304405573	8.61949095580531
242	50	2	B7	8	-0.630223821869988	0.344751128063201	0.121887930237601	15.7004355336411
242	50	3	B7	8	-0.548330663743558	0.357187018900456	0.12628468160816	22.6089223386528
242	50	4	B7	8	-0.544408860844643	0.356307969068483	0.125973890559565	29.5535187090159
242	50	5	B7	8	-0.613024198307015	0.36076566993731	0.12754992581599	36.3521202705442
242	50	6	B7	8	-0.590138033555818	0.374909466933974	0.132550513200023	43.1738334114083
242	50	7	B7	8	-0.535932576683455	0.352073091970356	0.124476635402777	50.1261600111094
242	50	8	B7	8	-0.528839345238125	0.375502659084364	0.132760238296067	57.0063062565045
242	50	9	B7	8	-0.595500997725613	0.349624651968709	0.12361098113853	63.9653953647157
242	50	10	B7	8	-0.613261268863222	0.379897414049907	0.134314018814962	70.7694472301381
242	50	11	B7	8	-0.632712459669742	0.375029913220763	0.132593097393102	77.7464845842661
242	50	0	B7	0	-0.780553475955195	0	0	0
33	7	1	B7	4	-0.47508819135975	0.213434202327782	0.106717101163891	6.86380708364218
33	7	2	B7	3	0.318989783860333	0.103807144824976	0.0599330830085063	11.7144619606563
33	7	3	B7	4	0.219875214798	0.285366685179215	0.142683342589607	17.6104477445825
33	7	4	B7	3	0.333180067397667	0.0871433808923112	0.0503122544162699	22.709350772026
33	7	5	B7	4	0.19904475937125	0.330086036021204	0.165043018010602	28.5037293523023
33	7	6	B7	3	0.191983446762333	0.258349470436195	0.149158136301334	33.9658738685604
33	7	7	B7	3	0.316882381181767	0.256555114702572	0.148122164535505	38.5837779649624
33	7	8	B7	3	0.0638363461214	0.152752329460964	0.0881915985336297	43.0242791841695
33	7	9	B7	3	0.154459582304	0.259539193452275	0.149845023204929	47.5282532964819
33	7	10	B7	4	0.33483220830475	0.189912223463677	0.0949561117318384	52.4597265419607
33	7	11	B7	3	0.291608323172667	0.116949417521958	0.0675207776878724	56.9641780623473
33	7	0	B7	0	-0.47508819135975	0	0	0
6	1	1	B8	6	-0.6119377012805	0.129590703174479	0.0529051830309908	7.30331997359194
6	1	2	B8	6	0.27874139381075	0.223736808549602	0.0913401696042157	12.8126848539632
6	1	3	B8	3	0.269846645981	0.0759600173388627	0.043855536458241	17.9802274955775
6	1	4	B8	4	0.28273245268375	0.0882045888173604	0.0441022944086802	23.5303659465363
6	1	5	B8	3	0.226909735645067	0.17987848924264	0.103852894185661	27.9801048786172
6	1	6	B8	3	0.396525195500667	0.142029327874482	0.0820006706811535	32.2235127861757
6	1	7	B8	3	0.413516520281667	0.158381638606815	0.0914416816843388	36.6777293011717
6	1	8	B8	3	0.196475127304333	0.321536190013588	0.185639005858552	41.7779203631308
6	1	9	B8	4	0.35610130880225	0.196229503188561	0.0981147515942804	46.7856866844091
6	1	10	B8	4	0.29897079275875	0.0918400622186002	0.0459200311093001	51.9857206937548
6	1	11	B8	4	0.13581927071114	0.213541238033498	0.106770619016749	57.3517219100948
6	1	0	B8	0	-0.6119377012805	0	0	0
10	2	1	B8	4	-0.41253417890775	0.198748073160248	0.0993740365801238	6.62361614194423
10	2	2	B8	3	0.0324638770343333	0.191802256009241	0.110737084138113	12.1538520435298
10	2	3	B8	3	0.349448358399333	0.0854417613052817	0.0493298238896401	16.9697802858776
10	2	4	B8	3	0.1177640756746	0.153367710990288	0.0885468892252392	22.3052326052534
10	2	5	B8	3	0.194415981641667	0.0753407888318771	0.043498024713043	27.6317464631491
10	2	6	B8	3	0.449114339086	0.246330262131332	0.142218843151075	33.3148449522444
10	2	7	B8	4	0.4884687102425	0.21795666596645	0.108978332983225	39.0262493502938
10	2	8	B8	4	0.519425747671	0.121416189734732	0.0607080948673659	44.7490733286921
10	2	9	B8	3	0.622825481269	0.264957226787899	0.15297312620973	50.116301417514
10	2	10	B8	4	0.53718384595825	0.109208828649521	0.0546044143247605	55.5701956747805
10	2	11	B8	3	0.669630235566333	0.148892334724788	0.0859630295336284	60.9293081341436
10	2	0	B8	0	-0.41253417890775	0	0	0
19	4	1	B8	3	-0.719780104016333	0.172016260375586	0.0993136342328374	6.29112088605176
19	4	2	B8	4	0.10720855637875	0.179686213943747	0.0898431069718735	12.8399949999303
19	4	3	B8	3	0.188894775341233	0.225717714318117	0.130318183122432	18.5853034266758
19	4	4	B8	4	0.45171003202	0.237491681941621	0.118745840970811	24.10468108164
19	4	5	B8	3	0.234573193730833	0.191230636556878	0.110407059493417	28.7781714706345
19	4	6	B8	3	0.191297849732157	0.226758724548115	0.13091921065895	33.9052556851169
19	4	7	B8	3	0.18932260690135	0.173595233956377	0.10022525505475	38.5333378588775
19	4	8	B8	3	0.327762711652	0.0341973280674505	0.0197438365653085	42.6177601435454
19	4	9	B8	4	0.0069300261628275	0.234950127130635	0.117475063565317	48.1770967191145
19	4	10	B8	4	-0.1449136991666	0.274811938030495	0.137405969015247	53.9917541763263
19	4	11	B8	4	0.1642615866353	0.0831596205001093	0.0415798102500547	59.1567820181275
19	4	0	B8	0	-0.719780104016333	0	0	0
24	5	1	B8	3	-0.319575452289667	0.14451479799687	0.0834356575253773	5.52336903358736
24	5	2	B8	3	-0.373974693015	0.12972691205058	0.0748978675935414	11.1211844232467
24	5	3	B8	6	-0.534322490015	0.141357414699176	0.0577089228953299	17.6163314361755
24	5	4	B8	3	-0.598520703403667	0.11770163597766	0.0679550712157614	24.1538412312975
24	5	5	B8	4	-0.49203028076225	0.14029516655369	0.0701475832768452	30.4926258497352
24	5	6	B8	3	-0.577371842193667	0.146794809375437	0.0847520227085485	36.5103792289842
24	5	7	B8	4	-0.17993993795845	0.190737134189002	0.095368567094501	42.7736097362799
24	5	8	B8	3	-0.724277823277667	0.0595906600518732	0.0344046836221365	49.7412466204444
24	5	9	B8	3	-0.515063348216	0.16332728711175	0.0942970531799804	55.4860897480556
24	5	10	B8	3	-0.47999369963	0.150182902126897	0.086708138970643	61.8146579854765
24	5	11	B8	3	-0.580125821220333	0.115289035962157	0.0665621559473639	68.2367949097142
24	5	0	B8	0	-0.319575452289667	0	0	0
242	50	1	B8	8	-0.391665314667918	0.345731389123922	0.122234504859285	6.65053751301505
242	50	2	B8	8	-0.399408356996773	0.366405361542376	0.129543857904861	13.0682955919427
242	50	3	B8	8	-0.414732413130601	0.31721306378536	0.112151754241794	19.4877144343674
242	50	4	B8	8	-0.28244755692943	0.389655107921491	0.137763884567631	25.9246809435161
242	50	5	B8	8	-0.332284057767203	0.378751964862323	0.133909041370939	32.3640463657849
242	50	6	B8	8	-0.267183893591211	0.339819333855202	0.120144277673654	38.7327446845349
242	50	7	B8	8	-0.383495269535501	0.374998510099294	0.132581994713032	45.1893833919378
242	50	8	B8	8	-0.330021935555965	0.392604349765161	0.13880659902114	51.6635079402811
242	50	9	B8	8	-0.345128069940009	0.397649493914072	0.14059032684102	58.2168135239777
242	50	10	B8	8	-0.416483789761654	0.403810252182569	0.142768483815472	64.7351244171932
242	50	11	B8	8	-0.363545175756077	0.339613697557577	0.1200715742634	71.1925002555904
242	50	0	B8	0	-0.391665314667918	0	0	0
33	7	1	B8	4	-0.45308451183025	0.178875974199326	0.0894379870996631	6.59578975636014
33	7	2	B8	3	-0.464479614122667	0.0421342737690662	0.0243262343026798	12.3386656358744
33	7	3	B8	4	-0.36589587104775	0.1670134265083	0.0835067132541498	18.561480813028
33	7	4	B8	3	-0.642159785248667	0.114482613752174	0.0660965678673494	24.4334837164506
33	7	5	B8	4	-0.4669905154205	0.0589378143001202	0.0294689071500601	31.3146440266279
33	7	6	B8	3	-0.666060004503333	0.0978665507028404	0.0565032793929451	37.9686406675554
33	7	7	B8	3	-0.792833921075	0.0912241942658722	0.0526683131160081	44.0870521057823
33	7	8	B8	3	-0.519364068638667	0.109828528085139	0.0634095302546554	49.9390617967696
33	7	9	B8	3	-0.343547994506	0.110950779022849	0.0640574621356403	55.4237441120193
33	7	10	B8	4	-0.4133702610125	0.124079443604505	0.0620397218022525	61.4832483981143
33	7	11	B8	3	-0.686249867710667	0.10352975888713	0.0597729341626217	67.5095317026752
33	7	0	B8	0	-0.45308451183025	0	0	0
6	1	1	B9	6	-0.537189282492167	0.101352899361637	0.0413771478979443	6.83033545697034
6	1	2	B9	6	0.15061303958305	0.254969380188961	0.104090813582774	12.8666738968467
6	1	3	B9	3	-0.261001269030667	0.0868987871342811	0.0501710381442292	19.8320040228671
6	1	4	B9	4	0.13226780885575	0.703972334055007	0.351986167027503	26.4537093310161
6	1	5	B9	3	-0.00129113550943333	0.145898906196014	0.0842347727667406	32.2497627262623
6	1	6	B9	3	-0.321039582732333	0.200354897627757	0.115674954078845	38.7886227076808
6	1	7	B9	3	-0.194032474758667	0.025178766357045	0.0145369675341027	45.5980063614584
6	1	8	B9	3	0.100379761806867	0.17883665583119	0.10325139138511	51.8643745948804
6	1	9	B9	4	0.1003105744076	0.421355341208705	0.210677670604353	58.3053744272349
6	1	10	B9	4	-0.00247185087765	0.0504886118995926	0.0252443059497963	64.7325894670662
6	1	11	B9	4	0.1486182829948	0.340013802988209	0.170006901494105	71.9691116667512
6	1	0	B9	0	-0.537189282492167	0	0	0
10	2	1	B9	4	-0.2854818702655	0.151496301169774	0.0757481505848869	6.18710838686188
10	2	2	B9	3	-0.225350350944333	0.199663085213091	0.115275535995009	11.9564491249333
10	2	3	B9	3	0.419190072986	0.115500599121222	0.0666843019942003	16.6268886563913
10	2	4	B9	2	-0.0109790796305	0.165213640550111	0.1168236855775	21.9979352933544
10	2	5	B9	3	0.0568087635578667	0.12937515363745	0.0746947797790311	27.3898429282455
10	2	6	B9	3	0.0657326209599333	0.0774612406017419	0.0447222681131781	32.9627978227694
10	2	7	B9	4	0.322590324568575	0.5370378527596	0.2685189263798	38.2432502279403
10	2	8	B9	4	0.1283194037343	0.0329577286428265	0.0164788643214132	43.586526805724
10	2	9	B9	3	0.0747856197810433	0.103605892547565	0.0598168899519684	49.0760460833144
10	2	10	B9	4	0.27850571542675	0.093102379130299	0.0465511895651495	54.0253790071671
10	2	11	B9	3	0.0763810162221667	0.139862460048449	0.0807496289584955	59.5378073995899
10	2	0	B9	0	-0.2854818702655	0	0	0
19	4	1	B9	3	-0.324322809389	0.188299138964399	0.10871455856927	5.73262449333728
19	4	2	B9	4	0.27849609707465	0.395053209881262	0.197526604940631	12.145883108386
19	4	3	B9	3	0.328803301447333	0.213524802249245	0.123278602057263	17.9524173365462
19	4	4	B9	4	0.52317400049625	0.305345798208503	0.152672899104252	23.4767848962799
19	4	5	B9	3	0.2157541464966	0.160405986207325	0.0926104393164264	28.2491148831401
19	4	6	B9	3	-0.0056578425205	0.0793281238161198	0.0458001136395448	34.1938962662192
19	4	7	B9	3	0.274324099905	0.156581807686795	0.0904025488181694	38.8845300585225
19	4	8	B9	3	0.359640565765	0.147803501164782	0.085334391184656	43.2632266802035
19	4	9	B9	4	0.776337720727985	1.20937376576894	0.604686882884468	48.8235501858481
19	4	10	B9	4	0.34181542187	0.547246895786074	0.273623447893037	54.4038955903777
19	4	11	B9	4	0.23248897874075	0.0992476598306453	0.0496238299153226	59.243914782668
19	4	0	B9	0	-0.324322809389	0	0	0
24	5	1	B9	3	-0.186751045831833	0.221800230014492	0.128056422505188	5.06433684823522
24	5	2	B9	3	-0.388963876928101	0.359753452798571	0.207703752815152	11.0396252226415
24	5	3	B9	6	-0.325591205225667	0.0945965166949716	0.0386188662245584	17.2970368248806
24	5	4	B9	3	-0.367823102354667	0.170166889088639	0.0982458992224869	23.4637380350168
24	5	5	B9	4	-0.390420253383	0.163031108662039	0.0815155543310195	29.6019634120758
24	5	6	B9	3	-0.409082349010667	0.287253994783832	0.165846171214241	35.2796797718425
24	5	7	B9	4	0.1889304427295	0.920879831298823	0.460439915649411	41.631450170876
24	5	8	B9	3	-0.491702371158	0.0425473175458561	0.0245647052383965	48.5437730932035
24	5	9	B9	3	-0.287496622346467	0.220069098979581	0.127056953536179	54.4703298595861
24	5	10	B9	3	-0.335288409305667	0.0694248136332738	0.0400824348396102	60.7884549501159
24	5	11	B9	3	-0.164065273261707	0.174032196486231	0.100477535488988	66.8101876735869
24	5	0	B9	0	-0.186751045831833	0	0	0
242	50	1	B9	8	-0.80575957441007	0.263902295664626	0.093303551417577	7.26125668997088
242	50	2	B9	8	-0.642806433108885	0.285482994138075	0.100933480534236	13.8758819625302
242	50	3	B9	8	-0.51283853969867	0.269904042998822	0.0954254895370663	20.1672861152556
242	50	4	B9	8	-0.620278992865339	0.29254608192066	0.103430659167827	26.791485173284
242	50	5	B9	8	-0.792411798236286	0.258974350862552	0.0915612598241475	33.9944481217994
242	50	6	B9	8	-0.611500794077698	0.284934037826963	0.100739395169155	40.489106435111
242	50	7	B9	8	-0.564290770590112	0.302092778238972	0.106805926020131	46.9646293637854
242	50	8	B9	8	-0.562541717365642	0.298176934091973	0.105421466044924	53.4115157123309
242	50	9	B9	8	-0.574070677715796	0.274581009920121	0.0970790470497842	59.8759352154273
242	50	10	B9	8	-0.641842321756769	0.315377542743146	0.111502799553814	66.6106857704908
242	50	11	B9	8	-0.574590544908184	0.230236714011354	0.0814009708777681	72.9343399450363
242	50	0	B9	0	-0.80575957441007	0	0	0
33	7	1	B9	4	-0.160000101011	0.106926246234549	0.0534631231172745	6.06355059614965
33	7	2	B9	3	0.0616366768353333	0.15353938254137	0.0886460038414691	11.6435092355776
33	7	3	B9	4	0.23491254106475	0.0624434785892197	0.0312217392946099	17.5143735014857
33	7	4	B9	3	0.213827876889667	0.0740957722527709	0.0427792140559505	23.2035516074122
33	7	5	B9	4	0.49377202498535	1.53507694551967	0.767538472759835	29.0628055679132
33	7	6	B9	3	0.347829202008333	0.230729556331455	0.133211771457969	33.9513320546416
33	7	7	B9	3	0.285566569260667	0.0718818935902407	0.0415010306141855	38.8889087100396
33	7	8	B9	3	-0.039537255256	0.552778654941457	0.31914690523273	43.5735956159773
33	7	9	B9	3	0.424241187179667	0.138224486502666	0.0798039444909121	47.8298484152661
33	7	10	B9	4	0.38196385624525	0.138346249107251	0.0691731245536257	52.4975600980421
33	7	11	B9	3	0.321309181380933	0.319697214697285	0.184577272964651	57.1603948939658
33	7	0	B9	0	-0.160000101011	0	0	0
6	1	1	C1	6	-0.5778066939965	0.172467723639061	0.0704096533358407	6.49337680993252
6	1	2	C1	6	0.125602333815917	0.110734463611973	0.0452071554650207	11.4258026942825
6	1	3	C1	3	0.131817424005567	0.0908346710587542	0.0524434217875228	16.4617125565212
6	1	4	C1	4	0.25129429578375	0.105090984795184	0.052545492397592	21.3816712144272
6	1	5	C1	3	0.168727351022967	0.121277339833554	0.0700195047995043	26.4843151639352
6	1	6	C1	3	0.298587623231	0.174735047185117	0.100883326529189	30.3115397818918
6	1	7	C1	3	0.36399465166	0.165403341052453	0.0954956634814971	34.5092459913051
6	1	8	C1	3	0.1914159669547	0.121940436205578	0.0704023436683909	39.0336741374584
6	1	9	C1	4	0.4301374206015	0.158569207374822	0.0792846036874108	43.5624917942788
6	1	10	C1	4	0.39200811363425	0.124306103093718	0.0621530515468588	47.8776446633777
6	1	11	C1	4	0.358491804073263	0.306348702569164	0.153174351284582	52.3808449618059
6	1	0	C1	0	-0.5778066939965	0	0	0
10	2	1	C1	4	-0.5346453108685	0.15527534280401	0.077637671402005	5.95705125053615
10	2	2	C1	3	0.133573197870333	0.359356869451959	0.20747478531323	11.3646379283601
10	2	3	C1	3	0.206112486156133	0.321827546341036	0.185807220512634	16.0150316368247
10	2	4	C1	3	0.204560837679333	0.107470307411562	0.0620480109139574	20.6562646905992
10	2	5	C1	3	0.319482791566	0.0646466730867601	0.0373237741088547	24.979375204739
10	2	6	C1	3	0.193663330993067	0.152499953714121	0.088045889328253	29.8667248775531
10	2	7	C1	4	0.29617797308675	0.0985797416134554	0.0492898708067277	34.7549179905495
10	2	8	C1	4	0.2968012728394	0.144760562773412	0.072380281386706	39.4567087521749
10	2	9	C1	3	0.14680902976072	0.125658857762083	0.0725491753549997	44.427134205465
10	2	10	C1	4	0.0727622466435	0.28123929817314	0.14061964908657	48.9788976257844
10	2	11	C1	3	0.291342286674	0.169847478650982	0.0980614875203235	53.7646976200944
10	2	0	C1	0	-0.5346453108685	0	0	0
19	4	10	C1	4	0.2780186317515	0.176893599961671	0.0884467999808354	51.0329221316579
19	4	11	C1	4	0.30209320063625	0.109678127253362	0.0548390636266808	55.4773526943013
19	4	1	C1	3	-0.783835465166333	0.342417337236426	0.197694741828645	6.0919622072204
19	4	2	C1	4	0.20083369926157	0.160486537121291	0.0802432685606456	11.7244035596104
19	4	3	C1	3	0.135456762869433	0.200368280547977	0.115682680711437	17.4703404847557
19	4	4	C1	4	0.34538305403875	0.162445137505611	0.0812225687528053	22.647301049232
19	4	5	C1	3	0.2948382434778	0.188233920548407	0.108676904699242	27.4094734776257
19	4	6	C1	3	0.243718218871667	0.349346387316578	0.20169523075765	32.7222681139014
19	4	7	C1	3	0.230665829005667	0.0719967462433003	0.0415673408243466	37.3077086168103
19	4	8	C1	3	0.110313905347833	0.229039381417483	0.132235948516409	41.2284739506191
19	4	9	C1	4	0.352150854315	0.435506011974928	0.217753005987464	45.8026743426574
19	4	0	C1	0	-0.783835465166333	0	0	0
24	5	1	C1	3	-0.401170781699667	0.119821888529625	0.0691791995973881	5.30211833847568
24	5	2	C1	3	-0.324489720845133	0.28101718636885	0.162245348196967	10.7657217901235
24	5	3	C1	6	-0.623976444751167	0.158595745810884	0.0647464421021347	17.0593090473052
24	5	4	C1	3	-0.111808410168807	0.203335206064301	0.117395635956952	22.3445421034519
24	5	5	C1	4	0.336567318501	0.0771502754998873	0.0385751377499436	26.8043466596023
24	5	6	C1	2	0.1926887790242	0.170142661218604	0.1203090295168	31.3588862180088
24	5	7	C1	4	0.302694850620375	0.140701432240484	0.070350716120242	36.2677364625878
24	5	8	C1	3	0.290742629086923	0.249604828883679	0.144109415147022	41.1600073018849
24	5	9	C1	3	0.031581967206181	0.195567808575632	0.112911126925966	45.2390199938329
24	5	10	C1	3	0.236390005256667	0.123519827436749	0.0713142056208629	49.7430685515488
24	5	11	C1	3	0.1139399971491	0.0811312206439015	0.0468411320784395	54.3802788176043
24	5	0	C1	0	-0.401170781699667	0	0	0
242	50	1	C1	8	-1.05517777811495	0.340235059330033	0.120291258824837	8.53452691542926
242	50	2	C1	8	-0.714453611157728	0.278018012619828	0.0982942110077438	15.8220005910955
242	50	3	C1	8	-0.651427931181889	0.274506157801531	0.0970525828294635	23.0718191965351
242	50	4	C1	8	-0.773387968535885	0.292277386081436	0.103335660842831	30.3010658412478
242	50	5	C1	8	-0.857586655477319	0.280093886760846	0.0990281433487455	37.3565782867506
242	50	6	C1	8	-0.800757208243943	0.285710692129697	0.101013983931205	44.3177455377749
242	50	7	C1	8	-0.71934159257155	0.284409092986165	0.100553799140816	51.5047792861795
242	50	8	C1	8	-0.817716656881761	0.331540480997184	0.117217261175479	58.5607751405402
242	50	9	C1	8	-0.849442184626373	0.310537767650092	0.109791680659956	65.7864618338125
242	50	10	C1	8	-0.887685359768482	0.331447251542154	0.11718429958555	72.7712132400791
242	50	11	C1	8	-0.788126363515737	0.302284028826424	0.106873543313777	80.0480907229628
242	50	0	C1	0	-1.05517777811495	0	0	0
33	7	1	C1	4	-0.59769962805425	0.184816370163481	0.0924081850817405	6.0707959885392
33	7	2	C1	3	-0.642606516151333	0.129842813770982	0.0749647834830147	11.2518094631057
33	7	3	C1	4	-0.56807471905875	0.143432126410265	0.0717160632051327	17.0781212782934
33	7	4	C1	3	-0.813034785195667	0.0726944854430187	0.0419701807391282	22.8201297809207
33	7	5	C1	4	-0.586819606016	0.158512743185865	0.0792563715929325	28.8441671046609
33	7	6	C1	3	-0.575186685784333	0.152834922625325	0.088239283719307	34.5222441313199
33	7	7	C1	3	-0.863859464337	0.0646754458375609	0.0373403860642749	40.4673111656189
33	7	8	C1	3	-0.541391018740667	0.220306259807361	0.127193878403939	45.8020096950666
33	7	9	C1	3	-0.365182792930667	0.272190638138291	0.157149338200038	50.7161905672598
33	7	10	C1	4	-0.65066172411475	0.106794237926472	0.0533971189632361	56.5958876724645
33	7	11	C1	3	-0.641817582214667	0.232595175461008	0.134288887164621	62.2934105375282
33	7	0	C1	0	-0.59769962805425	0	0	0
6	1	1	C10	6	-0.594850165900833	0.100791450284205	0.0411479372719001	7.19754862046275
6	1	2	C10	6	0.350553644037833	0.119936653015342	0.0489639335574711	12.845811724348
6	1	3	C10	3	0.160921519421	0.0294264461105454	0.0169893665832174	17.6762355292926
6	1	4	C10	4	0.42661423452575	0.244360561158272	0.122180280579136	22.8486226064837
6	1	5	C10	3	0.167661978517833	0.139555863077391	0.0805726151147221	27.1600614030886
6	1	6	C10	3	0.373347649272667	0.587372454797624	0.33911964489198	30.7490560944985
6	1	7	C10	3	0.55743726394	0.18170307766695	0.104906320803597	34.6370166791021
6	1	8	C10	3	0.806876020148333	0.0877230310013186	0.0506469155627412	38.821837820248
6	1	9	C10	4	0.725494429607	0.280731646269057	0.140365823134529	43.2331544309125
6	1	10	C10	4	0.77809669028675	0.218246032579149	0.109123016289574	47.5780569395412
6	1	11	C10	4	0.87441970460625	0.268147310933748	0.134073655466874	52.0377691973204
6	1	0	C10	0	-0.594850165900833	0	0	0
10	2	1	C10	4	-0.456268983267	0.232785583783567	0.116392791891784	6.44372431385236
10	2	2	C10	3	0.109561081732567	0.110568855068792	0.0638369582379559	11.5445537385865
10	2	3	C10	3	0.185714875266533	0.130891467526067	0.0755702240108001	15.8161055682448
10	2	4	C10	3	0.435747410036333	0.109287016099729	0.0630968881641093	19.8562632038704
10	2	5	C10	3	0.192695170679	0.0660648440576818	0.0381425555006733	24.3369762035943
10	2	6	C10	3	0.320271990682233	0.258300265666401	0.149129727914248	29.277571150504
10	2	7	C10	4	0.62544583916065	0.69625998567611	0.348129992838055	34.9113414717087
10	2	8	C10	4	0.2520328718805	0.0513148866202839	0.0256574433101419	39.9199215814326
10	2	9	C10	3	0.322429208645	0.221941226848199	0.128137827065084	44.8919595518863
10	2	10	C10	4	0.212490224948525	0.128985438093703	0.0644927190468516	49.8559357869528
10	2	11	C10	3	0.1224498880205	0.16691055246788	0.0963658523979194	55.0778346966237
10	2	0	C10	0	-0.456268983267	0	0	0
19	4	1	C10	3	-0.695098384644	0.150556560531319	0.086923870751021	5.7778531754805
19	4	2	C10	4	0.28486835166625	0.534426913576167	0.267213456788084	12.6340656276269
19	4	3	C10	3	-0.323524842514333	0.0327378061021832	0.0189011811657732	19.2354619082324
19	4	4	C10	4	0.34996419770225	0.165185328543502	0.0825926642717512	25.648111818073
19	4	5	C10	3	0.285476442519	0.0806070621670203	0.046538509040714	30.2419652531539
19	4	6	C10	3	0.2527683460108	0.211736514380449	0.122246133574825	35.5215858960741
19	4	7	C10	3	0.295841011863163	0.262740644438646	0.151693381793708	39.6347383209725
19	4	8	C10	3	0.184770712643247	0.162191160875814	0.0936411103918291	43.5570992981223
19	4	9	C10	4	0.407615989513	0.914320402764126	0.457160201382063	49.2627851334118
19	4	10	C10	4	0.407098604818525	0.905777099653283	0.452888549826641	55.2133032312893
19	4	11	C10	4	0.15679159543885	0.0865137850837178	0.0432568925418589	60.0525245039287
19	4	0	C10	0	-0.695098384644	0	0	0
24	5	1	C10	3	-0.489098974239333	0.130830721597772	0.0755351523327467	5.22292804696924
24	5	2	C10	3	-0.43325046942	0.191928876217505	0.110810188349439	10.3505468273581
24	5	3	C10	6	-0.443226525000333	0.1341682386532	0.0547739540647164	16.9790579243359
24	5	4	C10	3	-0.352571090016	0.174840172509389	0.100944020663456	23.3950658991355
24	5	5	C10	4	-0.53805326982675	0.071477117885831	0.0357385589429155	29.5484663793307
24	5	6	C10	3	-0.730568265455333	0.164999495040999	0.095262502878073	35.3720044250561
24	5	7	C10	4	-0.1713684112865	0.560459538673704	0.280229769336852	41.5672618285523
24	5	8	C10	3	-0.553055535279	0.0344457900636454	0.019887286165695	48.3298380068452
24	5	9	C10	3	-0.379695329977	0.218336172179668	0.126056447781764	53.5136556517913
24	5	10	C10	3	-0.473437584281333	0.0570504718408728	0.0329381052747231	59.8404580861955
24	5	11	C10	3	-0.356248926021667	0.0630669866770386	0.0364117417349668	66.0719204582008
24	5	0	C10	0	-0.489098974239333	0	0	0
242	50	1	C10	8	-0.518899462820503	0.304261750087935	0.107572773371433	6.93000947700038
242	50	2	C10	8	-0.527767295006021	0.3033136068604	0.10723755411857	13.7789327752383
242	50	3	C10	8	-0.607062499810811	0.369238264285467	0.130545440274902	20.9440149281692
242	50	4	C10	8	-0.644467017749956	0.32061593817704	0.113354852020736	28.2077850627874
242	50	5	C10	8	-0.452611414579328	0.299313763508434	0.10582339593964	35.3107090955269
242	50	6	C10	8	-0.558990634072189	0.275017555959676	0.097233389382219	42.5306313509772
242	50	7	C10	8	-0.571076548989264	0.295734268141991	0.104557853216221	49.5796104964863
242	50	8	C10	8	-0.568440715673408	0.308667986250353	0.10913061310641	56.6284167966084
242	50	9	C10	8	-0.490850164483543	0.356873269563766	0.126173754466377	63.7581472750581
242	50	10	C10	8	-0.462711678179551	0.311748108900637	0.110219600912861	70.8215093517116
242	50	11	C10	8	-0.61109253471535	0.326023869800319	0.115266844582243	77.9258024644462
242	50	0	C10	0	-0.518899462820503	0	0	0
33	7	1	C10	4	-0.506451073927	0.148652427413418	0.0743262137067088	6.73723016695393
33	7	2	C10	3	-0.374495330954667	0.0839778943397133	0.0484846599030114	12.0112706374627
33	7	3	C10	4	-0.413258378822	0.152314780454118	0.076157390227059	18.2141975041471
33	7	4	C10	3	-0.761090567318667	0.142052341210241	0.0820139574367491	23.8946333974169
33	7	5	C10	4	-0.15576139030075	0.735294517208441	0.36764725860422	30.5798929894349
33	7	6	C10	3	-0.367758193115	0.134773592395711	0.0778115698493164	37.1510496547856
33	7	7	C10	3	-0.777987330048333	0.103100385960577	0.0595250355878936	42.7049055923197
33	7	8	C10	3	-0.492610604119667	0.0936484099082726	0.0540679346697216	48.0328568411375
33	7	9	C10	3	-0.491902643123333	0.0874824913541898	0.0505080399327206	53.3821005140247
33	7	10	C10	4	-0.4570163183105	0.0877868954179758	0.0438934477089879	59.3803623661456
33	7	11	C10	3	-0.708294020871	0.167686742840516	0.0968139861185036	65.193846608226
33	7	0	C10	0	-0.506451073927	0	0	0
6	1	1	C11	6	-0.502500979198	0.0997104070718091	0.0407066032285219	6.56676236501288
6	1	2	C11	6	0.3571447056357	0.207355747706956	0.084652629519221	11.7061789386298
6	1	3	C11	3	0.267330469853	0.0714915411867318	0.0412756605489408	15.7857637478217
6	1	4	C11	4	0.22806378309275	0.258118911200755	0.129059455600377	21.240981439261
6	1	5	C11	3	0.156669543562867	0.109132741675136	0.0630078177835414	25.2803461111655
6	1	6	C11	3	0.280263260707	0.114748387369548	0.0662500123368838	28.8195250423747
6	1	7	C11	3	0.146128613946667	0.227929229792407	0.13159500217683	32.98620644654
6	1	8	C11	3	0.3487973918558	0.256968164872381	0.148360639162233	37.5451641861204
6	1	9	C11	4	0.0687115933725	0.116234815570163	0.0581174077850815	42.3873194563295
6	1	10	C11	4	0.17201676972985	0.0799941679603531	0.0399970839801766	47.0038518597476
6	1	11	C11	4	0.06667074350715	0.110748707553095	0.0553743537765476	52.417886009256
6	1	0	C11	0	-0.502500979198	0	0	0
10	2	1	C11	4	-0.459478777076	0.309493339294577	0.154746669647289	5.94060095829334
10	2	2	C11	3	0.120198975201233	0.104497789406641	0.0603318268436448	10.5530394158404
10	2	3	C11	3	0.192432039597367	0.2004839453364	0.115749459808169	14.4251003734861
10	2	4	C11	3	0.218572633713667	0.0972871865439129	0.0561687833398294	18.2827643950913
10	2	5	C11	3	0.227443650023667	0.056515138914409	0.0326290306655231	22.0521261048167
10	2	6	C11	3	0.372939344119667	0.245668544139975	0.141836800090638	26.911308552439
10	2	7	C11	4	0.279131910213225	0.333521668383125	0.166760834191563	32.3171387567801
10	2	8	C11	4	0.124156854046875	0.0751319571474802	0.0375659785737401	37.0016578322869
10	2	9	C11	3	0.332027682854333	0.227850090026895	0.131549310811908	41.874261480111
10	2	10	C11	4	0.30995569995	0.104864228657637	0.0524321143288186	46.376298318718
10	2	11	C11	3	0.317000496127367	0.225013345989751	0.129911515878441	50.9712256134322
10	2	0	C11	0	-0.459478777076	0	0	0
19	4	1	C11	3	-0.905132353086667	0.171588750784494	0.0990668114553395	5.54296402281061
19	4	2	C11	4	0.38881206272975	0.265838686352243	0.132919343176121	11.2713450679842
19	4	3	C11	3	0.356679749306333	0.193192040778836	0.111539476748954	16.5232030043459
19	4	4	C11	4	0.5534675473275	0.168376798710403	0.0841883993552016	21.7140533849737
19	4	5	C11	3	0.376417360926333	0.125468422341227	0.072439227413505	25.6057705991987
19	4	6	C11	2	0.04516065725225	0.131513266066694	0.09299392225175	31.0067479601985
19	4	7	C11	3	0.228785769543667	0.157071362997703	0.0906851937087052	34.7978766045586
19	4	8	C11	3	0.337056688756667	0.143867265263264	0.083061804327321	38.4568694576012
19	4	9	C11	4	0.4688501468455	0.268028838202876	0.134014419101438	43.2116832188897
19	4	10	C11	4	0.23790033005535	0.353447801557984	0.176723900778992	48.651438222486
19	4	11	C11	4	0.262235450340425	0.172846279647617	0.0864231398238086	53.129441878831
19	4	0	C11	0	-0.905132353086667	0	0	0
24	5	1	C11	3	-0.621610482399	0.127065787557133	0.0733614666509027	4.79800318870939
24	5	2	C11	3	-0.311672847526	0.0295468737887777	0.0170588955356627	9.801216314824
24	5	3	C11	6	-0.558751146806167	0.129424806797886	0.0528374561188526	16.4273632247041
24	5	4	C11	3	-0.0867889259643	0.198223742780432	0.114444531254058	22.370041824188
24	5	5	C11	4	0.326391867426	0.164896205500837	0.0824481027504186	26.9685916374182
24	5	6	C11	3	0.230725019675667	0.114816653227691	0.0662894256484592	31.2955438243918
24	5	7	C11	4	0.151018258603942	0.199875537568898	0.0999377687844492	36.3832562195011
24	5	8	C11	3	0.340268688584433	0.24902953231497	0.143777267518214	41.3289794872847
24	5	9	C11	3	0.319955167049	0.165267446239971	0.0954172045749295	44.9580454848176
24	5	10	C11	3	0.296870068800967	0.237162168652461	0.136925641913094	49.2917724506953
24	5	11	C11	3	0.364562192612667	0.197550028616324	0.114055562200053	53.7390168081333
24	5	0	C11	0	-0.621610482399	0	0	0
242	50	1	C11	8	-0.666233212830388	0.368428631965049	0.130259192022884	6.86643387286935
242	50	2	C11	8	-0.524935643235206	0.327515595658121	0.115794249317104	13.5368280925911
242	50	3	C11	8	-0.448754035292163	0.31714813061776	0.112128796900228	20.1535910033861
242	50	4	C11	8	-0.519567058809152	0.318085414577779	0.112460176822241	26.708897336748
242	50	5	C11	8	-0.595735806600227	0.425004069720285	0.150261629865547	33.5492054744482
242	50	6	C11	8	-0.548257820180275	0.371778995844331	0.131443724532126	40.119377085205
242	50	7	C11	8	-0.539891455408245	0.324262655177045	0.114644161180622	46.8183001429054
242	50	8	C11	8	-0.578005556324656	0.318520470755354	0.112613992408921	53.5451402498425
242	50	9	C11	8	-0.576567455206117	0.361194266105283	0.127701457444372	60.244625355948
242	50	10	C11	8	-0.513905680784151	0.324604266827162	0.114764939137787	66.9678658857866
242	50	11	C11	8	-0.613956504607376	0.352989141307239	0.124800507751783	73.5180340305625
242	50	0	C11	0	-0.666233212830388	0	0	0
33	7	1	C11	4	-0.59433714113675	0.14663089320182	0.0733154466009101	6.23588778462303
33	7	2	C11	3	-0.484714900777667	0.195537080008336	0.112893385779366	11.3025704144753
33	7	3	C11	4	-0.42063506292675	0.141142769820594	0.0705713849102969	16.9610799651773
33	7	4	C11	3	-0.767390242738667	0.208575560312881	0.120421155893019	22.0811087284858
33	7	5	C11	4	-0.29342870005675	0.117361604040217	0.0586808020201084	27.9656977738134
33	7	6	C11	3	-0.549130666865	0.0331365438246198	0.0191313924971581	34.0841204414524
33	7	7	C11	3	-0.964236692349667	0.145787717546557	0.0841705779700456	39.2807964819357
33	7	8	C11	3	-0.545403525503	0.157281674987278	0.0908066173925	44.2954622364966
33	7	9	C11	3	-0.434099905240333	0.0889547506605787	0.0513580492395811	49.0953870528682
33	7	10	C11	4	-0.58074939833	0.161300863075908	0.0806504315379538	54.7633906311648
33	7	11	C11	3	-0.827043651847667	0.0751037192963072	0.0433611525528651	60.1396497775293
33	7	0	C11	0	-0.59433714113675	0	0	0
6	1	1	C12	6	-0.586322240412	0.211767855874439	0.0864538651359375	6.12847723730904
6	1	2	C12	6	0.100443079986667	0.310191630448508	0.126635202846802	11.3391385925087
6	1	3	C12	3	0.08900696960565	0.134743562319343	0.0777942319766416	15.3947217196534
6	1	4	C12	4	0.2016362444264	0.163891405615023	0.0819457028075117	20.8549041896944
6	1	5	C12	3	0.114599095219733	0.0509542536845622	0.0294184520811385	24.5562991817273
6	1	6	C12	3	0.260631318797533	0.216473746539866	0.124981175837278	28.4550055993188
6	1	7	C12	3	0.159426503705667	0.0496359642924138	0.0286573373457118	32.164306911259
6	1	8	C12	3	0.379616209939567	0.268032720520367	0.154748763344061	36.5209857170411
6	1	9	C12	4	0.31170071337745	0.251605325936631	0.125802662968316	41.1136968355305
6	1	10	C12	4	0.205614420790375	0.244530562125951	0.122265281062975	45.4364617010706
6	1	11	C12	4	0.25102793441025	0.297176166681457	0.148588083340728	49.9600807331662
6	1	0	C12	0	-0.586322240412	0	0	0
10	2	1	C12	4	-0.71934897223375	0.177099223674073	0.0885496118370365	5.98877470240777
10	2	2	C12	3	-0.1391367661752	0.184847298791566	0.106721637716286	10.5445680122101
10	2	3	C12	3	-0.0231729157785	0.307687867216614	0.177643672963894	14.5164106106884
10	2	4	C12	3	0.176903659263633	0.170748742592109	0.0985818324993441	18.6836064087497
10	2	5	C12	3	0.0732498873844933	0.0791140538723695	0.0456765202998951	22.9837804993666
10	2	6	C12	3	0.284569298487067	0.295863339044968	0.170816778440954	27.8966372623262
10	2	7	C12	4	0.1270399814564	0.0987187467207188	0.0493593733603594	33.0994258919369
10	2	8	C12	4	0.193814807967375	0.135872423644058	0.0679362118220289	37.5786358687923
10	2	9	C12	3	0.450898490172333	0.350871583182652	0.202575803001494	42.0226579931433
10	2	10	C12	4	0.2289332602835	0.103577804833735	0.0517889024168674	46.3629729022611
10	2	11	C12	3	0.488962369095667	0.380819401416341	0.219866183920357	50.810442228764
10	2	0	C12	0	-0.71934897223375	0	0	0
19	4	1	C12	3	-0.998868368739	0.101578432597684	0.0586463354041332	5.40473980175802
19	4	2	C12	4	0.13946815608175	0.200784436870574	0.100392218435287	10.709885940274
19	4	3	C12	3	0.15966555102	0.300256263371153	0.173353034483207	16.0049051619971
19	4	4	C12	4	0.224031393944075	0.190581843241985	0.0952909216209923	21.1730682099965
19	4	5	C12	3	0.213330260104767	0.132111128573812	0.0762743956450358	24.9189998612864
19	4	6	C12	3	0.3450161976024	0.27816680627026	0.160599680479753	29.7196155414909
19	4	7	C12	3	0.174740052606967	0.166290774880099	0.0960080236407767	33.9875587893963
19	4	8	C12	3	0.100556496271333	0.0863766180956483	0.0498695637092121	37.6960563568991
19	4	9	C12	4	0.3652543870535	0.212067818839257	0.106033909419629	42.2869066172517
19	4	10	C12	4	0.086211857222725	0.256776592409731	0.128388296204865	47.2201025207259
19	4	11	C12	4	0.2036563175482	0.118793093904221	0.0593965469521107	51.5840208766904
19	4	0	C12	0	-0.998868368739	0	0	0
24	5	1	C12	3	-0.622037726988667	0.126464811180587	0.0730144927781272	5.10721807503414
24	5	2	C12	3	-0.299547227919333	0.0799602823249631	0.0461650905247959	10.0691394779308
24	5	3	C12	6	-0.461187725808667	0.443835135087469	0.181194935147257	15.8094465911526
24	5	4	C12	3	-0.615282981326333	0.137133130546351	0.0791738498357516	21.8683443711605
24	5	5	C12	4	0.0779518725601	0.100879381607632	0.0504396908038161	27.0910941841737
24	5	6	C12	3	-0.0912051264016667	0.259647447771779	0.149907523865436	31.3921036860151
24	5	7	C12	4	0.514008209559	0.240758193187387	0.120379096593694	36.1016505628293
24	5	8	C12	3	0.374666621517667	0.454236184659458	0.262253383488807	40.5395443266917
24	5	9	C12	3	-0.0161622207424333	0.0862004752700927	0.0497678676014617	44.3758736415302
24	5	10	C12	3	0.404144546832667	0.172589847102222	0.099644794683864	49.1281515394426
24	5	11	C12	3	0.395881595216333	0.227859235086775	0.131554590714691	53.4957693838966
24	5	0	C12	0	-0.622037726988667	0	0	0
242	50	1	C12	8	-0.341059806161559	0.253720566321459	0.0897037664861975	6.93244781890781
242	50	2	C12	8	-0.378937207114721	0.354091206783141	0.125190146737443	13.8628580023557
242	50	3	C12	8	-0.330358352011586	0.306321732404156	0.108301087103895	20.5820074658329
242	50	4	C12	8	-0.325554667457364	0.273913697941014	0.0968431166369874	27.4515197397469
242	50	5	C12	8	-0.334802986986636	0.236958808409528	0.0837775901441306	34.3293641742978
242	50	6	C12	8	-0.327335798592746	0.239497640457028	0.0846752028226711	41.1386760161817
242	50	7	C12	8	-0.318048303642748	0.313080776049996	0.11069076990205	47.8987020793985
[truncated: 4,913 more rows]
