# Supplementary material for: Genetically controlled mtDNA deletions prevent ROS damage by arresting oxidative phosphorylation
Source: eLife. 2022 Jul 8;11:e76095. doi: 10.7554/eLife.76095 (PMC9427111; doi:10.7554/eLife.76095)
Supplement: Figure 6—figure supplement 4—source data 1. — Data are shown in Figure 6—figure supplement 4B. [file elife-76095-fig6-figsupp4-data1.xlsx]

## Sheet: Data S10 - Variant calling
README: Variants found in Founder samples or variants below quality score of 20 (PHRED/QUAL) are filtered out. In the time resolved Fig S9C variants are filtered out that occur in more than 2 environments tested to exclude general background media adaptations.
The same variant has to exist in at least two time points in each population to be shown in Fig S9C.
Chr 12 is split on two contigs in the assembly at the rDNA cluster and is reported as part1 and part2
Multiple alternative alleles at the same position is reported on separate rows, which is why Derived and Reference does not add up to Depth when there are multiple alleles in the same locus.
Reference genome for variant calling is the pacbio de novo assembly (reads in: PRJNA622836)
Chromosome	Position	ORF	SnpEFF effect	Reference allele	Alternative allele	Amino acid change	Depth	Derived	Reference	Allele Frequncy	Class	Population	Batch cycle t
Chr10	723237	NA	NA	GG	GTG	NA	9	2	3	0.4	Other	A1	50
Chr10	723237	NA	NA	GG	TG	NA	9	4	3	0.571428571428571	Other	A1	50
Chr10	723243	NA	NA	GTG	GG	NA	7	4	3	0.571428571428571	Other	A1	50
Chr15	1072376	NA	NA	TGG	TGTG	NA	8	2	2	0.5	Other	A1	50
Chr15	1072376	NA	NA	TGG	TGGG	NA	8	2	2	0.5	Other	A1	50
Chr15	1072376	NA	NA	TGG	TGTGGG	NA	8	2	2	0.5	Other	A1	50
Chr1	217307	NA	NA	G	C	NA	20	20	0	1	Other	A2	50
Chr16	932281	NA	NA	GGTGGTGTG	GGTGTGTGGGTGTG	NA	16	2	3	0.4	Other	A2	50
Chr13	913679	NA	NA	C	T	NA	10	7	2	0.777777777777778	Other	A4	50
Chr8	13012	NA	NA	T	C	NA	9	9	0	1	Other	A4	50
Chr14	766198	NA	NA	GTG	GG	NA	7	2	5	0.285714285714286	Other	A4	50
Chr10	503137	NA	NA	TAAAAAAAAAAAAAG	TAAAAAATAAAAAAAG	NA	9	2	0	1	Other	A5	50
Chr10	503137	NA	NA	TAAAAAAAAAAAAAG	TAAAAAAAAAAAAAAG	NA	9	4	0	1	Other	A5	50
Chr10	503137	NA	NA	TAAAAAAAAAAAAAG	AAAAAAAAAAAAAAG	NA	9	2	0	1	Other	A5	50
Chr12_part_1	455890	NA	NA	TGG	TGTG	NA	9	2	3	0.4	Other	A5	50
Chr12_part_1	455906	NA	NA	TGG	TG	NA	6	4	0	1	Other	A5	50
Chr12_part_1	455906	NA	NA	TGG	TGTGGG	NA	6	2	0	1	Other	A5	50
Chr8	12994	NA	NA	G	A	NA	11	11	0	1	Other	A5	50
Chr16	95	NA	NA	CAC	CCC	NA	6	2	2	0.5	Other	A7	50
Chr5	6831	NA	NA	CCACACACACACACACAC	CCACACACACACCACAC	NA	19	2	0	1	Other	A7	50
Chr5	6831	NA	NA	CCACACACACACACACAC	CCACACACACACACAC	NA	19	12	0	1	Other	A7	50
Chr5	6831	NA	NA	CCACACACACACACACAC	CCACACACACCACAC	NA	19	3	0	1	Other	A7	50
Chr5	6831	NA	NA	CCACACACACACACACAC	CCACACACACACAC	NA	19	2	0	1	Other	A7	50
Chr13	922922	NA	NA	ATA	AA	NA	24	24	0	1	Other	A9	50
Chr12_part_1	455817	NA	NA	GTGTG	GGGTG	NA	20	2	7	0.222222222222222	Other	A11	50
Chr8	186	NA	NA	CACAC	CCAC	NA	18	9	9	0.5	Other	A11	50
Chr12_part_1	455842	NA	NA	GTGTGGTGTG	GTGGGTGTG	NA	13	2	0	1	Other	A12	50
Chr12_part_1	455842	NA	NA	GTGTGGTGTG	GTGTGGGTGTG	NA	13	5	0	1	Other	A12	50
Chr12_part_1	455842	NA	NA	GTGTGGTGTG	GG	NA	13	2	0	1	Other	A12	50
Chr12_part_1	455842	NA	NA	GTGTGGTGTG	GTGTGG	NA	13	2	0	1	Other	A12	50
Chr3	83438	YCR067C	CODON_DELETION(MODERATE||tcaatcccttca/tca|SIPS774S|YCR067C|||YCR067C|1)	ATCAATCCCTT	AT	SIPS774S	46	46	0	1	Other	A12	50
Chr10	723226	NA	NA	TGTGTGG	TGTGTGTG	NA	19	8	1	0.888888888888889	Other	B1	50
Chr10	723226	NA	NA	TGTGTGG	TGTGTGGG	NA	19	2	1	0.666666666666667	Other	B1	50
Chr10	723226	NA	NA	TGTGTGG	TGTG	NA	19	2	1	0.666666666666667	Other	B1	50
Chr10	723226	NA	NA	TGTGTGG	TG	NA	19	2	1	0.666666666666667	Other	B1	50
Chr10	723226	NA	NA	TGTGTGG	TGTGGGG	NA	19	2	1	0.666666666666667	Other	B1	50
Chr13	922937	NA	NA	TA	TTAA	NA	7	6	1	0.857142857142857	Other	B1	50
Chr14	541307	NA	NA	AA	AGA	NA	9	2	7	0.222222222222222	Other	B2	50
Chr7	27	NA	NA	CC	CAC	NA	6	2	4	0.333333333333333	Other	B5	50
Chr7	41	NA	NA	CCCACACCACAC	CCCACACACACAC	NA	12	2	0	1	Other	B5	50
Chr7	393446	NA	NA	G	T	NA	10	7	3	0.7	Other	B5	50
Chr7	532834	NA	NA	G	T	NA	25	25	0	1	Other	B5	50
Chr10	120	NA	NA	ACC	ACAC	NA	7	2	1	0.666666666666667	Other	B6	50
Chr10	120	NA	NA	ACC	ACCCAC	NA	7	2	1	0.666666666666667	Other	B6	50
Chr12_part_1	9838	NA	NA	TAA	TAAA	NA	30	4	26	0.133333333333333	Other	B6	50
Chr12_part_1	455891	NA	NA	GG	GTG	NA	6	2	4	0.333333333333333	Other	B6	50
Chr2	808179	NA	NA	G	T	NA	6	3	3	0.5	Other	B6	50
Chr4	1468464	NA	NA	CTTTTTTTTTTTA	CTTTTTTTTTCTTA	NA	6	2	0	1	Other	B6	50
Chr4	1468464	NA	NA	CTTTTTTTTTTTA	CTTTTTTTTTTTTA	NA	6	2	0	1	Other	B6	50
Chr14	527412	NA	NA	C	T	NA	40	40	0	1	Other	B6	50
Chr10	141	NA	NA	ACC	AC	NA	6	2	3	0.4	Other	B7	50
Chr6	31	NA	NA	C	A	NA	8	4	4	0.5	Other	B7	50
Chr12_part_1	455918	NA	NA	GGTGTGTGGTGTG	GGTGTGGGTGTG	NA	10	5	0	1	Other	B8	50
Chr12_part_1	455918	NA	NA	GGTGTGTGGTGTG	GG	NA	10	2	0	1	Other	B8	50
Chr12_part_1	455918	NA	NA	GGTGTGTGGTGTG	GGTGTGTGGGTGTG	NA	10	2	0	1	Other	B8	50
Chr12_part_2	3176	NA	NA	A	G	NA	17	17	0	1	Other	B8	50
Chr15	644601	NA	NA	GTTTTTTTTTTTTTTTC	GTTTTTTTTTTTTTTTT	NA	10	4	0	1	Other	B8	50
Chr15	644601	NA	NA	GTTTTTTTTTTTTTTTC	TTTTTTTTTTTTTTTTC	NA	10	2	0	1	Other	B8	50
Chr15	644601	NA	NA	GTTTTTTTTTTTTTTTC	GTTTTTTTTTTTTTTTTC	NA	10	3	0	1	Other	B8	50
Chr16	81	NA	NA	ACC	AC	NA	6	2	1	0.666666666666667	Other	B8	50
Chr16	81	NA	NA	ACC	ACCC	NA	6	2	1	0.666666666666667	Other	B8	50
Chr2	126687	NA	NA	CTTTTTTTTTTTTTG	CTTTGTTTTTTTTTTG	NA	20	2	0	1	Other	B8	50
Chr2	126687	NA	NA	CTTTTTTTTTTTTTG	TTTTTTTTTTTTTTG	NA	20	5	0	1	Other	B8	50
Chr2	808167	NA	NA	TGG	TGTGGG	NA	15	8	2	0.8	Other	B8	50
Chr4	92	NA	NA	CAC	CC	NA	10	7	3	0.7	Other	B8	50
Chr3	318957	NA	NA	TGTGG	TGTG	NA	15	6	3	0.666666666666667	Other	B10	50
Chr3	318957	NA	NA	TGTGG	TG	NA	15	3	3	0.5	Other	B10	50
Chr3	318957	NA	NA	TGTGG	TGTGGTG	NA	15	2	3	0.4	Other	B10	50
Chr7	741048	NA	NA	C	A	NA	17	17	0	1	Other	B12	50
Chr16	925009	NA	NA	CTTTTTTTTTTTTTTG	CTTTTTTTTTTTTTTT	NA	7	6	0	1	Other	C2	50
Chr15	104927	NA	NA	GTTTTTTTTTTTTTA	GTTTTTTTTTTTTATA	NA	9	2	0	1	Other	C3	50
Chr15	104927	NA	NA	GTTTTTTTTTTTTTA	GTTTTTTTTTTTTTTA	NA	9	4	0	1	Other	C3	50
Chr15	104927	NA	NA	GTTTTTTTTTTTTTA	GTTTTTTTTTTTTTTTA	NA	9	2	0	1	Other	C3	50
Chr3	319182	NA	NA	GTG	GTGG	NA	6	2	0	1	Other	C4	50
Chr10	152	NA	NA	ACCACACC	ACACACACC	NA	14	2	0	1	Other	C5	50
Chr10	152	NA	NA	ACCACACC	AC	NA	14	2	0	1	Other	C5	50
Chr10	152	NA	NA	ACCACACC	ACCCACACC	NA	14	3	0	1	Other	C5	50
Chr10	152	NA	NA	ACCACACC	ACCACACCC	NA	14	3	0	1	Other	C5	50
Chr10	152	NA	NA	ACCACACC	ACCACACCCAC	NA	14	2	0	1	Other	C5	50
Chr11	644650	NA	NA	CAAAAAAAAAAAAAAAAT	AAAAAAAAAAAAAAAAAT	NA	9	3	0	1	Other	C5	50
Chr11	644650	NA	NA	CAAAAAAAAAAAAAAAAT	TAAAAAAAAAAAAAAAAT	NA	9	1	0	1	Other	C5	50
Chr11	644650	NA	NA	CAAAAAAAAAAAAAAAAT	CAAAAAAAAAAAAAAAAA	NA	9	1	0	1	Other	C5	50
Chr11	644650	NA	NA	CAAAAAAAAAAAAAAAAT	CAAAAAAAAAAAAAACAT	NA	9	1	0	1	Other	C5	50
Chr11	644650	NA	NA	CAAAAAAAAAAAAAAAAT	CAAAAAAAAAAAAAAAT	NA	9	3	0	1	Other	C5	50
Chr4	31360	NA	NA	ATTTTTTTTTTTC	ATTTTTTATTTTTC	NA	14	2	0	1	Other	C5	50
Chr4	31360	NA	NA	ATTTTTTTTTTTC	ATTTTTTTTTTTTC	NA	14	11	0	1	Other	C5	50
Chr9	440817	NA	NA	TGT	GGT	NA	9	4	3	0.571428571428571	Other	C5	50
Chr9	440817	NA	NA	TGT	TGGT	NA	9	2	3	0.4	Other	C5	50
Chr14	766249	NA	NA	GG	GTG	NA	6	4	1	0.8	Other	C5	50
Chr12_part_1	441090	NA	NA	TAAAAAAAAAAAAT	TAAAAAAAAAATAAT	NA	9	2	0	1	Other	C9	50
Chr13	735905	NA	NA	C	T	NA	12	12	0	1	Other	C9	50
Chr3	49	NA	NA	CC	CAC	NA	8	4	4	0.5	Other	C9	50
Chr14	446052	NA	NA	G	C	NA	27	27	0	1	Other	C9	50
Chr10	194676	NA	NA	T	A	NA	21	21	0	1	Other	C10	50
Chr10	194677	NA	NA	T	C	NA	21	21	0	1	Other	C10	50
Chr16	932192	NA	NA	TGTGTGGT	TGTGTGTGT	NA	40	4	2	0.666666666666667	Other	C11	50
Chr16	932192	NA	NA	TGTGTGGT	TGTGTGGGT	NA	40	12	2	0.857142857142857	Other	C11	50
Chr16	932192	NA	NA	TGTGTGGT	TGTGTGGGTGTGGT	NA	40	6	2	0.75	Other	C11	50
Chr2	808143	NA	NA	TGTGGG	TGTGGTG	NA	8	3	1	0.75	Other	D4	50
Chr2	808143	NA	NA	TGTGGG	TG	NA	8	2	1	0.666666666666667	Other	D4	50
Chr3	318842	NA	NA	A	G	NA	17	13	4	0.764705882352941	Other	D4	50
Chr11	158	NA	NA	CACCCAC	CACCCC	NA	10	3	3	0.5	Other	D5	50
Chr11	158	NA	NA	CACCCAC	CC	NA	10	2	3	0.4	Other	D5	50
Chr11	158	NA	NA	CACCCAC	CACCAC	NA	10	2	3	0.4	Other	D5	50
Chr15	1072524	NA	NA	TGG	TGTG	NA	7	2	0	1	Other	D5	50
Chr8	12196	NA	NA	C	G	NA	7	6	1	0.857142857142857	Other	D5	50
Chr3	29	NA	NA	ACACCC	ACACACC	NA	9	2	3	0.4	Other	D6	50
Chr3	29	NA	NA	ACACCC	AC	NA	9	4	3	0.571428571428571	Other	D6	50
Chr3	21723	NA	NA	A	G	NA	6	6	0	1	Other	D6	50
Chr12_part_2	562563	NA	NA	T	G	NA	22	22	0	1	Other	D7	50
Chr8	150	NA	NA	ACC	ACCCAC	NA	9	2	2	0.5	Other	D7	50
Chr9	441019	NA	NA	GTG	GG	NA	31	12	15	0.444444444444444	Other	D7	50
Chr4	91	NA	NA	CC	CAC	NA	7	2	5	0.285714285714286	Other	D8	50
Chr9	435958	NA	NA	G	A	NA	23	23	0	1	Other	D8	50
Chr15	1072343	NA	NA	GGTG	GGG	NA	16	11	3	0.785714285714286	Other	D9	50
Chr15	1072343	NA	NA	GGTG	GGTGTG	NA	16	2	3	0.4	Other	D9	50
Chr12_part_2	7	NA	NA	C	A	NA	15	2	13	0.133333333333333	Other	D10	50
Chr15	1072470	NA	NA	TGG	TGTG	NA	20	4	11	0.266666666666667	Other	D10	50
Chr7	647860	NA	NA	ATTTTTTTTTTTTTG	ATTTTTTTTTTTTTT	NA	9	2	0	1	Other	D10	50
Chr7	647860	NA	NA	ATTTTTTTTTTTTTG	ATTTTTTTTTTTTTTG	NA	9	6	0	1	Other	D10	50
Chr9	80	NA	NA	CCACAC	CC	NA	18	5	1	0.833333333333333	Other	D10	50
Chr9	80	NA	NA	CCACAC	CCACACC	NA	18	10	1	0.909090909090909	Other	D10	50
Chr9	80	NA	NA	CCACAC	CCCACACACAC	NA	18	2	1	0.666666666666667	Other	D10	50
Chr3	86	NA	NA	ACACC	ACAC	NA	6	2	1	0.666666666666667	Other	D11	50
Chr3	86	NA	NA	ACACC	AC	NA	6	2	1	0.666666666666667	Other	D11	50
Chr11	351996	YKL046C	STOP_GAINED(HIGH|NONSENSE|tgG/tgA|W159*|YKL046C|||YKL046C|1)	C	T	W159*	25	25	0	1	Stop	A5	50
Chr9	386881	YIR019C	STOP_GAINED(HIGH|NONSENSE|Gaa/Taa|E764*|YIR019C|||YIR019C|1|WARNING_TRANSCRIPT_MULTIPLE_STOP_CODONS)	C	A	E764*	30	29	1	0.966666666666667	Stop	B5	50
Chr15	919757	YOL087C	STOP_GAINED(HIGH|NONSENSE|tCa/tAa|S288*|YOL087C|||YOL087C|1)	C	A	S288*	51	50	1	0.980392156862745	Stop	B6	50
Chr15	496790	YOR132W	STOP_GAINED(HIGH|NONSENSE|taC/taA|Y313*|YOR132W|||YOR132W|1)	G	T	Y313*	17	17	0	1	Stop	C6	50
Chr7	959834	YGL197W	STOP_GAINED(HIGH|NONSENSE|Caa/Taa|Q810*|YGL197W|||YGL197W|1)	G	A	Q810*	7	7	0	1	Stop	D4	50
Chr7	753732	YGL094C	STOP_GAINED(HIGH|NONSENSE|Aga/Tga|R290*|YGL094C|||YGL094C|1)	A	T	R290*	21	21	0	1	Stop	D5	50
Chr12_part_1	388675	YLL037W,YLL038C	FRAME_SHIFT(HIGH||ctt/cTtt|L20L?|YLL037W|||YLL037W|1),FRAME_SHIFT(HIGH||ttt/ttCt|F22F?|YLL037W|||YLL037W|1),UPSTREAM(MODIFIER||101||YLL038C|||YLL038C|),UPSTREAM(MODIFIER||108||YLL038C|||YLL038C|)	GAAAAAAAAAAAAAG	GAAAAAAGAAAAAAAG	F22F?,NA	9	2	0	1	Frame	C11	50
Chr15	467357	YOR148C	FRAME_SHIFT(HIGH||aaa/aGaa|K24R?|YOR148C|||YOR148C|1|WARNING_TRANSCRIPT_INCOMPLETE),FRAME_SHIFT(HIGH||act/aAct|T25N?|YOR148C|||YOR148C|1|WARNING_TRANSCRIPT_INCOMPLETE)	CAAAAAAAAAAAC	CAAAAAAAAGAAAC	K24R?	14	2	0	1	Frame	D1	50
Chr8	6931	YHR217C	FRAME_SHIFT(HIGH||cca/Acca|P29T?|YHR217C|||YHR217C|1|WARNING_TRANSCRIPT_INCOMPLETE),FRAME_SHIFT(HIGH||cca/|P29|YHR217C|||YHR217C|1|WARNING_TRANSCRIPT_INCOMPLETE)	ACC	ACAC	P29T?	35	19	8	0.703703703703704	Frame	D12	50
Chr8	6931	YHR217C	FRAME_SHIFT(HIGH||cca/Acca|P29T?|YHR217C|||YHR217C|1|WARNING_TRANSCRIPT_INCOMPLETE),FRAME_SHIFT(HIGH||cca/|P29|YHR217C|||YHR217C|1|WARNING_TRANSCRIPT_INCOMPLETE)	ACC	AC	P29	35	7	8	0.466666666666667	Frame	D12	50
Chr2	271874	YBR150C	NON_SYNONYMOUS_CODING(MODERATE|MISSENSE|tAc/tGc|Y600C|YBR150C|||YBR150C|1)	A	G	Y600C	40	33	7	0.825	Non-Synonymous	A2	50
Chr7	606853	YGL008C	NON_SYNONYMOUS_CODING(MODERATE|MISSENSE|tGt/tTt|C409F|YGL008C|||YGL008C|1)	G	T	C409F	22	22	0	1	Non-Synonymous	A2	50
Chr16	883870	YPL260W	NON_SYNONYMOUS_CODING(MODERATE|MISSENSE|gAa/gTa|E372V|YPL260W|||YPL260W|1)	T	A	E372V	16	16	0	1	Non-Synonymous	A4	50
Chr11	185323	YKL139W	NON_SYNONYMOUS_CODING(MODERATE|MISSENSE|Aat/Tat|N517Y|YKL139W|||YKL139W|1)	A	T	N517Y	31	23	8	0.741935483870968	Non-Synonymous	A5	50
Chr4	1316032	YDL154W	NON_SYNONYMOUS_CODING(MODERATE|MISSENSE|Gtg/Atg|V375M|YDL154W|||YDL154W|1)	C	T	V375M	16	16	0	1	Non-Synonymous	A7	50
Chr7	606477	YGL008C	NON_SYNONYMOUS_CODING(MODERATE|MISSENSE|Ggt/Tgt|G284C|YGL008C|||YGL008C|1)	G	T	G284C	32	23	9	0.71875	Non-Synonymous	A8	50
Chr11	575994	YKR072C	NON_SYNONYMOUS_CODING(MODERATE|MISSENSE|gAc/gGc|D537G|YKR072C|||YKR072C|1)	T	C	D537G	24	18	6	0.75	Non-Synonymous	A9	50
Chr11	84011	YKL190W	NON_SYNONYMOUS_CODING(MODERATE|MISSENSE|aaC/aaA|N143K|YKL190W|||YKL190W|2)	C	A	N143K	33	33	0	1	Non-Synonymous	B2	50
Chr14	656627	YNL275W	NON_SYNONYMOUS_CODING(MODERATE|MISSENSE|Gca/Aca|A448T|YNL275W|||YNL275W|1)	C	T	A448T	31	24	7	0.774193548387097	Non-Synonymous	B2	50
Chr7	844084	YGL140C	NON_SYNONYMOUS_CODING(MODERATE|MISSENSE|aTt/aCt|I742T|YGL140C|||YGL140C|1)	T	C	I742T	16	16	0	1	Non-Synonymous	B3	50
Chr11	352115	YKL046C	NON_SYNONYMOUS_CODING(MODERATE|MISSENSE|Gcc/Ccc|A120P|YKL046C|||YKL046C|1)	C	G	A120P	58	58	0	1	Non-Synonymous	B4	50
Chr13	799313	YMR275C	NON_SYNONYMOUS_CODING(MODERATE|MISSENSE|tTg/tGg|L390W|YMR275C|||YMR275C|1)	A	C	L390W	31	31	0	1	Non-Synonymous	B4	50
Chr11	351502	YKL046C	NON_SYNONYMOUS_CODING(MODERATE|MISSENSE|cTa/cCa|L324P|YKL046C|||YKL046C|1)	A	G	L324P	27	26	1	0.962962962962963	Non-Synonymous	B5	50
Chr7	452388	YGR084C	NON_SYNONYMOUS_CODING(MODERATE|MISSENSE|Gga/Aga|G2R|YGR084C|||YGR084C|1)	G	A	G2R	30	30	0	1	Non-Synonymous	B5	50
Chr2	74346	YBR260C	NON_SYNONYMOUS_CODING(MODERATE|MISSENSE|tTc/tCc|F88S|YBR260C|||YBR260C|1)	T	C	F88S	36	36	0	1	Non-Synonymous	B6	50
Chr7	441408	YGR089W	NON_SYNONYMOUS_CODING(MODERATE|MISSENSE|aCt/aAt|T718N|YGR089W|||YGR089W|1)	G	T	T718N	12	12	0	1	Non-Synonymous	B6	50
Chr7	807337	YGL122C	NON_SYNONYMOUS_CODING(MODERATE|MISSENSE|gCg/gTg|A329V|YGL122C|||YGL122C|1|WARNING_TRANSCRIPT_NO_START_CODON)	C	T	A329V	36	36	0	1	Non-Synonymous	B6	50
Chr16	536884	YPL082C	NON_SYNONYMOUS_CODING(MODERATE|MISSENSE|gCt/gAt|A1390D|YPL082C|||YPL082C|1)	C	A	A1390D	25	25	0	1	Non-Synonymous	B7	50
Chr8	498542	YHL028W	NON_SYNONYMOUS_CODING(MODERATE|MISSENSE|aCg/aTg|T141M|YHL028W|||YHL028W|1)	G	A	T141M	42	22	20	0.523809523809524	Non-Synonymous	B9	50
Chr3	292838	YCL055W	NON_SYNONYMOUS_CODING(MODERATE|MISSENSE|tGt/tTt|C233F|YCL055W|||YCL055W|1)	C	A	C233F	27	27	0	1	Non-Synonymous	B10	50
Chr7	862817	YGL150C	NON_SYNONYMOUS_CODING(MODERATE|MISSENSE|cTt/cAt|L515H|YGL150C|||YGL150C|1)	T	A	L515H	23	17	6	0.739130434782609	Non-Synonymous	B10	50
Chr16	493615	YPL058C	NON_SYNONYMOUS_CODING(MODERATE|MISSENSE|Gcc/Acc|A322T|YPL058C|||YPL058C|1)	G	A	A322T	23	23	0	1	Non-Synonymous	B11	50
Chr13	845740	YMR298W	NON_SYNONYMOUS_CODING(MODERATE|MISSENSE|Aaa/Gaa|K17E|YMR298W|||YMR298W|1)	A	G	K17E	25	25	0	1	Non-Synonymous	C1	50
Chr11	527747	YKR050W	NON_SYNONYMOUS_CODING(MODERATE|MISSENSE|Gat/Aat|D145N|YKR050W|||YKR050W|1)	G	A	D145N	48	36	12	0.75	Non-Synonymous	C3	50
Chr8	284021	YHR082C	NON_SYNONYMOUS_CODING(MODERATE|MISSENSE|aGt/aAt|S25N|YHR082C|||YHR082C|1)	G	A	S25N	16	16	0	1	Non-Synonymous	C3	50
Chr14	46229	YNR059W	NON_SYNONYMOUS_CODING(MODERATE|MISSENSE|aCc/aTc|T333I|YNR059W|||YNR059W|1)	G	A	T333I	9	9	0	1	Non-Synonymous	C4	50
Chr16	430705	YPL020C	NON_SYNONYMOUS_CODING(MODERATE|MISSENSE|Gcc/Acc|A612T|YPL020C|||YPL020C|1)	G	A	A612T	21	21	0	1	Non-Synonymous	C5	50
Chr7	65417	YGR278W	NON_SYNONYMOUS_CODING(MODERATE|MISSENSE|aaG/aaT|K167N|YGR278W|||YGR278W|1)	C	A	K167N	33	19	14	0.575757575757576	Non-Synonymous	C7	50
Chr7	897948	YGL167C	NON_SYNONYMOUS_CODING(MODERATE|MISSENSE|agT/agA|S513R|YGL167C|||YGL167C|1)	T	A	S513R	22	19	3	0.863636363636364	Non-Synonymous	C7	50
Chr14	101182	YNR031C	NON_SYNONYMOUS_CODING(MODERATE|MISSENSE|tGc/tTc|C1055F|YNR031C|||YNR031C|1)	G	T	C1055F	29	29	0	1	Non-Synonymous	C7	50
Chr4	674176	YDR186C	NON_SYNONYMOUS_CODING(MODERATE|MISSENSE|aAc/aTc|N441I|YDR186C|||YDR186C|1)	A	T	N441I	31	31	0	1	Non-Synonymous	C11	50
Chr14	676377	YNL285W	NON_SYNONYMOUS_CODING(MODERATE|MISSENSE|aaA/aaT|K22N|YNL285W|||YNL285W|1)	T	A	K22N	35	35	0	1	Non-Synonymous	C12	50
Chr4	1297612	YDL145C	NON_SYNONYMOUS_CODING(MODERATE|MISSENSE|Cgt/Agt|R99S|YDL145C|||YDL145C|1)	C	A	R99S	26	26	0	1	Non-Synonymous	D1	50
Chr5	149417	YER132C	NON_SYNONYMOUS_CODING(MODERATE|MISSENSE|Gaa/Aaa|E1324K|YER132C|||YER132C|1)	G	A	E1324K	35	35	0	1	Non-Synonymous	D1	50
Chr15	453670	YOR153W	NON_SYNONYMOUS_CODING(MODERATE|MISSENSE|gCt/gAt|A999D|YOR153W|||YOR153W|1)	G	T	A999D	14	14	0	1	Non-Synonymous	D2	50
Chr11	185339	YKL139W	NON_SYNONYMOUS_CODING(MODERATE|MISSENSE|aAt/aTt|N522I|YKL139W|||YKL139W|1)	A	T	N522I	19	19	0	1	Non-Synonymous	D3	50
Chr1	4640	YHR214C-D	NON_SYNONYMOUS_CODING(MODERATE|MISSENSE|gaG/gaT|E2D||YHR214C-D|||YHR214C-D|1|1|WARNING_TRANSCRIPT_MULTIPLE_STOP_CODONS)	G	T	E2D	13	11	2	0.846153846153846	Non-Synonymous	D5	50
Chr12_part_1	254032	YLR028C	NON_SYNONYMOUS_CODING(MODERATE|MISSENSE|Cag/Aag|Q167K|YLR028C|||YLR028C|1)	C	A	Q167K	26	26	0	1	Non-Synonymous	D5	50
Chr11	511259	YKR037C	NON_SYNONYMOUS_CODING(MODERATE|MISSENSE|gGt/gAt|G137D|YKR037C|||YKR037C|1)	C	T	G137D	20	16	4	0.8	Non-Synonymous	D6	50
Chr5	373904	YER023W	NON_SYNONYMOUS_CODING(MODERATE|MISSENSE|Aca/Gca|T42A|YER023W|||YER023W|1)	T	C	T42A	58	58	0	1	Non-Synonymous	D6	50
Chr15	775171	YOL016C	NON_SYNONYMOUS_CODING(MODERATE|MISSENSE|Ttt/Ctt|F30L|YOL016C|||YOL016C|1)	T	C	F30L	27	27	0	1	Non-Synonymous	D7	50
Chr16	700038	YPL167C	NON_SYNONYMOUS_CODING(MODERATE|MISSENSE|gAt/gTt|D122V|YPL167C|||YPL167C|1)	A	T	D122V	24	24	0	1	Non-Synonymous	D8	50
Chr16	815707	YPL227C	NON_SYNONYMOUS_CODING(MODERATE|MISSENSE|Gca/Cca|A153P|YPL227C|||YPL227C|1)	G	C	A153P	19	19	0	1	Non-Synonymous	D8	50
Chr4	1333911	YDL167C	NON_SYNONYMOUS_CODING(MODERATE|MISSENSE|aGt/aTt|S525I|YDL167C|||YDL167C|1)	G	T	S525I	17	17	0	1	Non-Synonymous	D8	50
Chr9	68024	YIL147C	NON_SYNONYMOUS_CODING(MODERATE|MISSENSE|Ccg/Acg|P256T|YIL147C|||YIL147C|1)	G	T	P256T	25	25	0	1	Non-Synonymous	D8	50
Chr9	68026	YIL147C	NON_SYNONYMOUS_CODING(MODERATE|MISSENSE|cCa/cAa|P255Q|YIL147C|||YIL147C|1)	G	T	P255Q	25	25	0	1	Non-Synonymous	D8	50
Chr13	803014	YMR277W	NON_SYNONYMOUS_CODING(MODERATE|MISSENSE|cCt/cTt|P286L|YMR277W|||YMR277W|1)	C	T	P286L	17	17	0	1	Non-Synonymous	D9	50
Chr4	185217	YDR443C	NON_SYNONYMOUS_CODING(MODERATE|MISSENSE|Gcg/Acg|A1010T|YDR443C|||YDR443C|1)	G	A	A1010T	19	19	0	1	Non-Synonymous	D11	50
Chr10	97107	YJL171C	NON_SYNONYMOUS_CODING(MODERATE|MISSENSE|gCt/gTt|A89V|YJL171C|||YJL171C|1)	G	A	A89V	27	26	0	1	Non-Synonymous	D12	50
Chr4	1488235	YDL247W	NON_SYNONYMOUS_CODING(MODERATE|MISSENSE|Cag/Gag|Q217E|YDL247W|||YDL247W|1|WARNING_TRANSCRIPT_INCOMPLETE)	G	C	Q217E	25	23	2	0.92	Non-Synonymous	D12	50
Chr16	582017	YPL105C	SYNONYMOUS_CODING(LOW|SILENT|ttG/ttA|L207|YPL105C|||YPL105C|1)	G	A	L207	26	26	0	1	Synonymous	A7	50
Chr4	720889	YDR165W	SYNONYMOUS_CODING(LOW|SILENT|ggC/ggT|G250|YDR165W|||YDR165W|1)	G	A	G250	11	10	1	0.909090909090909	Synonymous	A8	50
Chr12_part_1	92938	YLR108C	SYNONYMOUS_CODING(LOW|SILENT|aaG/aaA|K89|YLR108C|||YLR108C|1)	G	A	K89	28	28	0	1	Synonymous	A11	50
Chr16	105295	YPR152C	SYNONYMOUS_CODING(LOW|SILENT|caA/caG|Q316|YPR152C|||YPR152C|1)	A	G	Q316	35	28	7	0.8	Synonymous	B1	50
Chr12_part_2	88528	YLR422W	SYNONYMOUS_CODING(LOW|SILENT|acG/acT|T1887|YLR422W|||YLR422W|1)	C	A	T1887	10	10	0	1	Synonymous	B3	50
Chr12_part_2	41984	YLR443W	SYNONYMOUS_CODING(LOW|SILENT|ggC/ggG|G257|YLR443W|||YLR443W|1)	G	C	G257	61	61	0	1	Synonymous	B5	50
Chr12_part_2	13562	YLR454W	SYNONYMOUS_CODING(LOW|SILENT|gcT/gcC|A2606|YLR454W|||YLR454W|1)	A	G	A2606	22	22	0	1	Synonymous	C3	50
Chr13	611818	YMR185W	SYNONYMOUS_CODING(LOW|SILENT|ctC/ctA|L21|YMR185W|||YMR185W|1)	C	A	L21	36	36	0	1	Synonymous	C3	50
Chr7	429698	YGR093W	SYNONYMOUS_CODING(LOW|SILENT|tcT/tcC|S142|YGR093W|||YGR093W|1)	A	G	S142	16	16	0	1	Synonymous	C3	50
Chr8	204387	YHR120W	SYNONYMOUS_CODING(LOW|SILENT|aaG/aaA|K516|YHR120W|||YHR120W|1)	C	T	K516	8	8	0	1	Synonymous	C4	50
Chr2	78252	YBR259W,YBR258C	SYNONYMOUS_CODING(LOW|SILENT|caG/caA|Q28|YBR259W|||YBR259W|1),UPSTREAM(MODIFIER||308||YBR258C|||YBR258C|)	C	T	Q28,NA	32	27	5	0.84375	Synonymous	C7	50
Chr8	8173	YHR216W	SYNONYMOUS_CODING(LOW|SILENT|acC/acG|T435|YHR216W|||YHR216W|1)	G	C	T435	25	16	9	0.64	Synonymous	D4	50
Chr6	153672	YFL003C	SYNONYMOUS_CODING(LOW|SILENT|ttA/ttG|L684|YFL003C|||YFL003C|1)	T	C	L684	15	15	0	1	Synonymous	D5	50
Chr14	297193	YNL078W	SYNONYMOUS_CODING(LOW|SILENT|cgA/cgG|R134|YNL078W|||YNL078W|1)	T	C	R134	24	24	0	1	Synonymous	D6	50
Chr10	133388	YJL151C,YJL150W,YJL149W	UPSTREAM(MODIFIER||138||YJL151C|||YJL151C|),UPSTREAM(MODIFIER||151||YJL151C|||YJL151C|),UPSTREAM(MODIFIER||195||YJL150W|||YJL150W|),UPSTREAM(MODIFIER||208||YJL150W|||YJL150W|),UPSTREAM(MODIFIER||451||YJL149W|||YJL149W|),UPSTREAM(MODIFIER||464||YJL149W|||YJL149W|)	GAAAAAAAAAAAAAAAG	AAAAAAAAAAAAAAAAG	NA,NA,NA	12	7	2	0.777777777777778	Upstream	A2	50
Chr10	133388	YJL151C,YJL150W,YJL149W	UPSTREAM(MODIFIER||138||YJL151C|||YJL151C|),UPSTREAM(MODIFIER||151||YJL151C|||YJL151C|),UPSTREAM(MODIFIER||195||YJL150W|||YJL150W|),UPSTREAM(MODIFIER||208||YJL150W|||YJL150W|),UPSTREAM(MODIFIER||451||YJL149W|||YJL149W|),UPSTREAM(MODIFIER||464||YJL149W|||YJL149W|)	GAAAAAAAAAAAAAAAG	GAAAAAAAAAAAAG	NA,NA,NA	12	2	2	0.5	Upstream	A2	50
Chr13	856447	YMR303C,YMR304W	UPSTREAM(MODIFIER||239||YMR303C|||YMR303C|),UPSTREAM(MODIFIER||406||YMR304W|||YMR304W|)	A	T	NA,NA	18	10	5	0.666666666666667	Upstream	A7	50
Chr13	856447	YMR303C,YMR304W	UPSTREAM(MODIFIER||239||YMR303C|||YMR303C|),UPSTREAM(MODIFIER||406||YMR304W|||YMR304W|)	A	C	NA,NA	18	3	5	0.375	Upstream	A7	50
Chr15	422294	YOR171C,YOR172W	UPSTREAM(MODIFIER||318||YOR171C|||YOR171C|),UPSTREAM(MODIFIER||8||YOR172W|||YOR172W|)	T	A	NA,NA	26	26	0	1	Upstream	A7	50
Chr7	264718	YGR178C	UPSTREAM(MODIFIER||294||YGR178C|||YGR178C|),UPSTREAM(MODIFIER||306||YGR178C|||YGR178C|)	GAAAAAAAAAAAAT	GTAAAAAAAAAAAAT	NA	11	2	0	1	Upstream	A7	50
Chr7	264718	YGR178C	UPSTREAM(MODIFIER||294||YGR178C|||YGR178C|),UPSTREAM(MODIFIER||306||YGR178C|||YGR178C|)	GAAAAAAAAAAAAT	GAAAAAAAAAAAAAT	NA	11	8	0	1	Upstream	A7	50
Chr8	428424	YHR009C	UPSTREAM(MODIFIER||150||YHR009C|||YHR009C|)	G	T	NA	7	6	1	0.857142857142857	Upstream	A7	50
Chr4	242709	YDR408C,YDR409W	UPSTREAM(MODIFIER||203||YDR408C|||YDR408C|),UPSTREAM(MODIFIER||344||YDR409W|||YDR409W|)	C	G	NA,NA	25	25	0	1	Upstream	A8	50
Chr11	144772	YKL163W	UPSTREAM(MODIFIER||450||YKL163W|||YKL163W||WARNING_TRANSCRIPT_NO_START_CODON)	T	A	NA	16	16	0	1	Upstream	B2	50
Chr7	6949	YFL063W	UPSTREAM(MODIFIER||311||YFL063W|||YFL063W||WARNING_TRANSCRIPT_INCOMPLETE),UPSTREAM(MODIFIER||315||YFL063W|||YFL063W||WARNING_TRANSCRIPT_INCOMPLETE)	CCACACACACACACAC	CCACACACACCACAC	NA	24	4	0	1	Upstream	B4	50
Chr7	6949	YFL063W	UPSTREAM(MODIFIER||311||YFL063W|||YFL063W||WARNING_TRANSCRIPT_INCOMPLETE),UPSTREAM(MODIFIER||315||YFL063W|||YFL063W||WARNING_TRANSCRIPT_INCOMPLETE)	CCACACACACACACAC	CCACACACACACAC	NA	24	17	0	1	Upstream	B4	50
Chr8	428406	YHR009C	UPSTREAM(MODIFIER||152||YHR009C|||YHR009C|),UPSTREAM(MODIFIER||153||YHR009C|||YHR009C|)	CTTTTTTTTTTTTTTTC	CTTTTTTTTTTTTTTTT	NA	8	4	1	0.8	Upstream	B4	50
Chr8	428406	YHR009C	UPSTREAM(MODIFIER||152||YHR009C|||YHR009C|),UPSTREAM(MODIFIER||153||YHR009C|||YHR009C|)	CTTTTTTTTTTTTTTTC	CTTTTTTTTTTTTTTC	NA	8	3	1	0.75	Upstream	B4	50
Chr3	93249	YCR060W,YCR059C	UPSTREAM(MODIFIER||149||YCR060W|||YCR060W|),UPSTREAM(MODIFIER||155||YCR060W|||YCR060W|),UPSTREAM(MODIFIER||19||YCR059C|||YCR059C|),UPSTREAM(MODIFIER||25||YCR059C|||YCR059C|)	GAAAAAAAAAAAAG	GAAAAAAAAAAAAAAG	NA,NA	17	4	1	0.8	Upstream	B6	50
Chr12_part_2	412654	YLR251W	UPSTREAM(MODIFIER||438||YLR251W|||YLR251W|)	C	T	NA	6	6	0	1	Upstream	B7	50
Chr4	63938	YDR509W,YDR508C	UPSTREAM(MODIFIER||63||YDR508C|||YDR508C|)	G	T	H94Q,NA	13	8	5	0.615384615384615	Upstream	B12	50
Chr14	396346	YNL130C	UPSTREAM(MODIFIER||123||YNL130C|||YNL130C|),UPSTREAM(MODIFIER||125||YNL130C|||YNL130C|),UPSTREAM(MODIFIER||140||YNL130C|||YNL130C|)	GTTTTTTTTTTTTTTTTC	GTTTTTTTTTTTTTTC	NA	14	2	2	0.5	Upstream	B12	50
Chr12_part_2	53993	YLR436C	UPSTREAM(MODIFIER||128||YLR436C|||YLR436C|),UPSTREAM(MODIFIER||144||YLR436C|||YLR436C|)	GAAAAAAAAAAAAAAAAG	AAAAAAAAAAAAAAAAAG	NA	9	5	1	0.833333333333333	Upstream	C1	50
Chr12_part_2	53993	YLR436C	UPSTREAM(MODIFIER||128||YLR436C|||YLR436C|),UPSTREAM(MODIFIER||144||YLR436C|||YLR436C|)	GAAAAAAAAAAAAAAAAG	GAAAAAAAAAAAAAAAG	NA	9	2	1	0.666666666666667	Upstream	C1	50
Chr7	896386	YGL167C	UPSTREAM(MODIFIER||24||YGL167C|||YGL167C|)	G	A	NA	26	26	0	1	Upstream	C1	50
Chr13	20983	YML122C,YML121W	UPSTREAM(MODIFIER||166||YML122C|||YML122C|),UPSTREAM(MODIFIER||341||YML121W|||YML121W|)	A	T	NA,NA	6	4	2	0.666666666666667	Upstream	C2	50
Chr14	513912	YNL201C	UPSTREAM(MODIFIER||144||YNL201C|||YNL201C|),UPSTREAM(MODIFIER||146||YNL201C|||YNL201C|)	GAAAAAAAAAAT	GAAAAAAAATAAT	NA	14	2	1	0.666666666666667	Upstream	C2	50
Chr14	513912	YNL201C	UPSTREAM(MODIFIER||144||YNL201C|||YNL201C|),UPSTREAM(MODIFIER||146||YNL201C|||YNL201C|)	GAAAAAAAAAAT	GAAAAAAAAAAAT	NA	14	9	1	0.9	Upstream	C2	50
Chr13	38315	YML113W,YML114C	UPSTREAM(MODIFIER||120||YML113W|||YML113W|),UPSTREAM(MODIFIER||350||YML114C|||YML114C|)	A	T	NA,NA	6	5	1	0.833333333333333	Upstream	C4	50
Chr4	37999	YDR528W	UPSTREAM(MODIFIER||157||YDR528W|||YDR528W|),UPSTREAM(MODIFIER||172||YDR528W|||YDR528W|),UPSTREAM(MODIFIER||173||YDR528W|||YDR528W|)	CTTTTTTTTTTTTTTTG	CTTTTTTTTTTTTTTTT	NA	15	8	2	0.8	Upstream	C11	50
Chr4	37999	YDR528W	UPSTREAM(MODIFIER||157||YDR528W|||YDR528W|),UPSTREAM(MODIFIER||172||YDR528W|||YDR528W|),UPSTREAM(MODIFIER||173||YDR528W|||YDR528W|)	CTTTTTTTTTTTTTTTG	CTTTTTTTTTTTTTTG	NA	15	2	2	0.5	Upstream	C11	50
Chr4	37999	YDR528W	UPSTREAM(MODIFIER||157||YDR528W|||YDR528W|),UPSTREAM(MODIFIER||172||YDR528W|||YDR528W|),UPSTREAM(MODIFIER||173||YDR528W|||YDR528W|)	CTTTTTTTTTTTTTTTG	TTTTTTTTTTTTTTTTG	NA	15	3	2	0.6	Upstream	C11	50
Chr5	516021	YEL050W-A	UPSTREAM(MODIFIER||178||YEL050W-A|||YEL050W-A|)	GAAAAAAAAAAAAAAAG	GAAAAAAAAAAAAAAAAG	NA	9	2	0	1	Upstream	C11	50
Chr9	71349	YIL146C	UPSTREAM(MODIFIER||240||YIL146C|||YIL146C|),UPSTREAM(MODIFIER||255||YIL146C|||YIL146C|),UPSTREAM(MODIFIER||256||YIL146C|||YIL146C|)	CTTTTTTTTTTTTTTTG	CTTTTTTTTTTTTTTTT	NA	10	5	1	0.833333333333333	Upstream	C11	50
Chr9	71349	YIL146C	UPSTREAM(MODIFIER||240||YIL146C|||YIL146C|),UPSTREAM(MODIFIER||255||YIL146C|||YIL146C|),UPSTREAM(MODIFIER||256||YIL146C|||YIL146C|)	CTTTTTTTTTTTTTTTG	CTTTTTTTTTTTTTTG	NA	10	2	1	0.666666666666667	Upstream	C11	50
Chr9	71349	YIL146C	UPSTREAM(MODIFIER||240||YIL146C|||YIL146C|),UPSTREAM(MODIFIER||255||YIL146C|||YIL146C|),UPSTREAM(MODIFIER||256||YIL146C|||YIL146C|)	CTTTTTTTTTTTTTTTG	TTTTTTTTTTTTTTTTG	NA	10	2	1	0.666666666666667	Upstream	C11	50
Chr9	284898	YIL034C	UPSTREAM(MODIFIER||112||YIL034C|||YIL034C|),UPSTREAM(MODIFIER||119||YIL034C|||YIL034C|)	GAAAAAAAAAAAAAAT	GAAAAAAAGAAAAAAAT	NA	11	2	1	0.666666666666667	Upstream	C11	50
Chr9	284898	YIL034C	UPSTREAM(MODIFIER||112||YIL034C|||YIL034C|),UPSTREAM(MODIFIER||119||YIL034C|||YIL034C|)	GAAAAAAAAAAAAAAT	GAAAAAAAAAAAAAAAT	NA	11	4	1	0.8	Upstream	C11	50
Chr9	284898	YIL034C	UPSTREAM(MODIFIER||112||YIL034C|||YIL034C|),UPSTREAM(MODIFIER||119||YIL034C|||YIL034C|)	GAAAAAAAAAAAAAAT	GAAAAAAAAAAAAAAAAT	NA	11	3	1	0.75	Upstream	C11	50
Chr10	106392	YJL165C	UPSTREAM(MODIFIER||460||YJL165C|||YJL165C|),UPSTREAM(MODIFIER||467||YJL165C|||YJL165C|)	GAAAAAAAAAAAAT	GAAAAATAAAAAAAT	NA	6	2	0	1	Upstream	C12	50
Chr10	57038	YJL198W,YJL199C	UPSTREAM(MODIFIER||307||YJL198W|||YJL198W|),UPSTREAM(MODIFIER||356||YJL199C|||YJL199C|)	G	A	NA,NA	33	33	0	1	Upstream	D2	50
Chr11	615143	YKR093W	UPSTREAM(MODIFIER||35||YKR093W|||YKR093W|),UPSTREAM(MODIFIER||39||YKR093W|||YKR093W|)	ATTTTTTTTTTC	ATTTTTTCTTTTC	NA	13	2	0	1	Upstream	D5	50
Chr16	863286	YPL253C,YPL251W	UPSTREAM(MODIFIER||156||YPL253C|||YPL253C|),UPSTREAM(MODIFIER||463||YPL251W|||YPL251W|)	A	G	NA,NA	30	30	0	1	Upstream	D5	50
Chr13	280728	YMR014W	UPSTREAM(MODIFIER||472||YMR014W|||YMR014W|)	G	A	NA	19	19	0	1	Upstream	D6	50
Chr2	191787	YBR200W-A	UPSTREAM(MODIFIER||192||YBR200W-A|||YBR200W-A|)	C	A	NA	21	21	0	1	Upstream	D6	50
Chr10	112397	YJL162C	UPSTREAM(MODIFIER||282||YJL162C|||YJL162C|)	A	T	NA	21	21	0	1	Upstream	D8	50
Chr13	804517	YMR278W	UPSTREAM(MODIFIER||129||YMR278W|||YMR278W|)	GTTTTTTTTTTTTG	TTTTTTTTTTTTTG	NA	7	5	2	0.714285714285714	Upstream	D8	50
Chr14	64676	YNR051C	UPSTREAM(MODIFIER||358||YNR051C|||YNR051C|)	A	G	NA	13	13	0	1	Upstream	D8	50
Chr7	202974	YGR210C,YGR211W	UPSTREAM(MODIFIER||190||YGR210C|||YGR210C|),UPSTREAM(MODIFIER||204||YGR210C|||YGR210C|),UPSTREAM(MODIFIER||298||YGR211W|||YGR211W|),UPSTREAM(MODIFIER||312||YGR211W|||YGR211W|)	CTTTTTTTTTTTTTC	CTTTTTTTTTTTTTT	NA,NA	8	4	0	1	Upstream	D9	50
Chr7	202974	YGR210C,YGR211W	UPSTREAM(MODIFIER||190||YGR210C|||YGR210C|),UPSTREAM(MODIFIER||204||YGR210C|||YGR210C|),UPSTREAM(MODIFIER||298||YGR211W|||YGR211W|),UPSTREAM(MODIFIER||312||YGR211W|||YGR211W|)	CTTTTTTTTTTTTTC	CTTTTTTTTTTTTTTC	NA,NA	8	2	0	1	Upstream	D9	50
Chr7	202974	YGR210C,YGR211W	UPSTREAM(MODIFIER||190||YGR210C|||YGR210C|),UPSTREAM(MODIFIER||204||YGR210C|||YGR210C|),UPSTREAM(MODIFIER||298||YGR211W|||YGR211W|),UPSTREAM(MODIFIER||312||YGR211W|||YGR211W|)	CTTTTTTTTTTTTTC	TTTTTTTTTTTTTTC	NA,NA	8	2	0	1	Upstream	D9	50
Chr11	197027	YKL130C	UPSTREAM(MODIFIER||182||YKL130C|||YKL130C|)	T	A	NA	9	7	2	0.777777777777778	Upstream	D10	50
Chr12_part_1	16455	YLR152C	UPSTREAM(MODIFIER||53||YLR152C|||YLR152C|)	A	G	NA	31	31	0	1	Upstream	D12	50
Chr12_part_2	407307	YLR255C,YLR256W	UPSTREAM(MODIFIER||421||YLR255C|||YLR255C|)	A	T	NA,NA	13	9	4	0.692307692307692	Upstream	D12	50
Chr15	269297	YOR259C,YOR260W	UPSTREAM(MODIFIER||124||YOR259C|||YOR259C|),UPSTREAM(MODIFIER||151||YOR260W|||YOR260W|)	C	A	NA,NA	38	38	0	1	Upstream	D12	50
Chr6	223314	YFR028C	START_LOST(HIGH|MISSENSE|aTg/aGg|M1R|YFR028C|||YFR028C|1),UPSTREAM(MODIFIER||15||YFR028C|||YFR028C|),UPSTREAM(MODIFIER||16||YFR028C|||YFR028C|)	ATTTTTTTTTTTTTTTTA	ATTTTTTTTTTTTTTTTT	NA	6	3	0	1	Start	B4	50
Chr6	223314	YFR028C	START_LOST(HIGH|MISSENSE|aTg/aGg|M1R|YFR028C|||YFR028C|1),UPSTREAM(MODIFIER||15||YFR028C|||YFR028C|),UPSTREAM(MODIFIER||16||YFR028C|||YFR028C|)	ATTTTTTTTTTTTTTTTA	CTTTTTTTTTTTTTTTTA	M1R	6	1	0	1	Start	B4	50
Chr6	223314	YFR028C	START_LOST(HIGH|MISSENSE|aTg/aGg|M1R|YFR028C|||YFR028C|1),UPSTREAM(MODIFIER||15||YFR028C|||YFR028C|),UPSTREAM(MODIFIER||16||YFR028C|||YFR028C|)	ATTTTTTTTTTTTTTTTA	ATTTTTTTTTTTTTTTA	NA	6	2	0	1	Start	B4	50
Chr1	4740	YHR214C-D	STOP_LOST(HIGH|MISSENSE|Tag/Cag|*36Q||YHR214C-D|||YHR214C-D|1|1|WARNING_TRANSCRIPT_MULTIPLE_STOP_CODONS)	T	C	*36Q	8	6	2	0.75	Stop	B7	50
Chr1	47045	NA	NA	T	A	NA	47	37	8	0.822222222222222	Other	A7	9
Chr1	47045	NA	NA	T	A	NA	42	33	9	0.785714285714286	Other	A7	5
Chr1	47045	NA	NA	T	A	NA	75	40	35	0.533333333333333	Other	A7	3
Chr1	47045	NA	NA	T	A	NA	60	54	6	0.9	Other	A7	15
Chr10	586565	NA	NA	ATTTTTTTTTTA	ATTTGTTTTTTTA	NA	20	2	0	1	Other	B12	5
Chr10	586565	NA	NA	ATTTTTTTTTTA	ATTTTTTTTTTTA	NA	20	18	0	1	Other	B12	5
Chr10	30529	YJL212C	NON_SYNONYMOUS_CODING(MODERATE|MISSENSE|Ggt/Tgt|G742C|YJL212C|||YJL212C|1)	C	A	G742C	24	15	9	0.625	Non-Synonymous	A7	7
Chr10	194117	NA	NA	G	A	NA	14	9	5	0.642857142857143	Other	A7	5
Chr10	723097	NA	NA	TGT	TGG	NA	10	4	4	0.5	Other	B12	3
Chr10	723097	NA	NA	TGT	TGGT	NA	10	2	4	0.333333333333333	Other	B12	3
Chr11	16023	NA	NA	C	T	NA	10	8	2	0.8	Other	A7	15
Chr11	67052	YKL201C	SYNONYMOUS_CODING(LOW|SILENT|gaG/gaA|E209|YKL201C|||YKL201C|1)	C	T	E209	82	54	28	0.658536585365854	Synonymous	B12	15
Chr11	16032	NA	NA	G	A	NA	10	8	2	0.8	Other	A7	9
Chr11	16032	NA	NA	G	A	NA	10	8	2	0.8	Other	A7	15
Chr11	16264	NA	NA	T	A	NA	16	16	0	1	Other	A7	4
Chr11	16264	NA	NA	T	A	NA	19	18	1	0.947368421052632	Other	A7	7
Chr11	16264	NA	NA	T	A	NA	12	10	2	0.833333333333333	Other	B12	2
Chr11	16264	NA	NA	T	A	NA	38	37	1	0.973684210526316	Other	A7	15
Chr11	16264	NA	NA	T	A	NA	32	27	5	0.84375	Other	A7	3
Chr11	16264	NA	NA	T	A	NA	21	20	1	0.952380952380952	Other	A7	5
Chr11	16255	NA	NA	TT	TA	NA	26	8	3	0.727272727272727	Other	A7	9
Chr11	16255	NA	NA	TT	TA	NA	18	2	4	0.333333333333333	Other	B8	9
Chr11	16255	NA	NA	TT	TA	NA	14	2	2	0.5	Other	B12	2
Chr11	16255	NA	NA	TT	TA	NA	18	2	0	1	Other	A7	4
Chr11	16255	NA	NA	TT	TA	NA	29	4	1	0.8	Other	A7	7
Chr11	16255	NA	NA	TT	TA	NA	39	6	6	0.5	Other	A7	2
Chr12_part_1	2656	NA	NA	AT	AG	NA	17	14	0	1	Other	B8	7
Chr12_part_1	2656	NA	NA	AT	AGT	NA	17	3	0	1	Other	B8	7
Chr12_part_1	154161	NA	NA	CTTTTTTTTTTTTTA	CTTTTTTTTTTTTTT	NA	12	3	0	1	Other	A7	4
Chr12_part_1	154161	NA	NA	CTTTTTTTTTTTTTA	CTTTTTTTTTTTTTT	NA	20	5	1	0.833333333333333	Other	B12	3
Chr12_part_1	154161	NA	NA	CTTTTTTTTTTTTTA	CTTTTTTTTTTTTTTA	NA	12	5	0	1	Other	A7	4
Chr12_part_1	154161	NA	NA	CTTTTTTTTTTTTTA	CTTTTTTTTTTTTTTA	NA	20	12	1	0.923076923076923	Other	B12	3
Chr12_part_1	455819	NA	NA	GTGGTGTG	GG	NA	10	2	0	1	Other	A8	3
Chr12_part_1	455819	NA	NA	GTGGTGTG	GGGGTGTG	NA	17	2	5	0.285714285714286	Other	B8	4
Chr12_part_1	455817	NA	NA	GTGTG	GG	NA	15	2	4	0.333333333333333	Other	B8	2
Chr12_part_1	455817	NA	NA	GTGTG	GTGG	NA	15	9	4	0.692307692307692	Other	B8	2
Chr12_part_1	449001	NA	NA	TGGG	TG	NA	11	6	5	0.545454545454545	Other	B8	4
Chr12_part_2	3176	NA	NA	A	G	NA	24	23	1	0.958333333333333	Other	B8	15
Chr12_part_2	40372	YLR446W	UPSTREAM(MODIFIER||213||YLR446W|||YLR446W|)	C	A	NA	15	12	2	0.857142857142857	Upstream	B8	7
Chr12_part_2	470319	YLR223C	NON_SYNONYMOUS_CODING(MODERATE|MISSENSE|Gaa/Caa|E744Q|YLR223C|||YLR223C|1)	G	C	E744Q	26	16	10	0.615384615384615	Non-Synonymous	A7	15
Chr12_part_2	61525	YLR432W	SYNONYMOUS_CODING(LOW|SILENT|acC/acG|T435|YLR432W|||YLR432W|1)	G	C	T435	23	13	10	0.565217391304348	Synonymous	A8	9
Chr12_part_2	525716	YLR188W	UPSTREAM(MODIFIER||333||YLR188W|||YLR188W|)	TAAAAAAAAAAAAAAG	TAAAAAAAAAAAAAAA	NA	10	4	1	0.8	Upstream	B12	4
Chr12_part_2	525716	YLR188W	UPSTREAM(MODIFIER||333||YLR188W|||YLR188W|)	TAAAAAAAAAAAAAAG	TAAAAAAAAAAAAAAAG	NA	10	5	1	0.833333333333333	Upstream	B12	4
Chr13	52160	NA	NA	A	G	NA	66	56	10	0.848484848484849	Other	A7	9
Chr13	52160	NA	NA	A	G	NA	55	36	19	0.654545454545455	Other	A7	7
Chr13	52160	NA	NA	A	G	NA	81	69	12	0.851851851851852	Other	A7	15
Chr13	922938	NA	NA	A	T	NA	18	18	0	1	Other	B12	9
Chr13	356943	YMR052C-A	NON_SYNONYMOUS_CODING(MODERATE|MISSENSE|aGt/aTt|S52I|YMR052C-A|||YMR052C-A|1|WARNING_TRANSCRIPT_MULTIPLE_STOP_CODONS)	C	A	S52I	18	13	5	0.722222222222222	Non-Synonymous	A7	15
Chr13	243938	NA	NA	C	T	NA	17	11	6	0.647058823529412	Other	A8	9
Chr13	922848	NA	NA	C	T	NA	371	347	24	0.935309973045822	Other	A7	7
Chr13	922848	NA	NA	C	T	NA	690	688	2	0.997101449275362	Other	A7	15
Chr13	922848	NA	NA	C	T	NA	451	446	5	0.988913525498891	Other	A7	9
Chr13	224182	YML016C	UPSTREAM(MODIFIER||318||YML016C|||YML016C|),UPSTREAM(MODIFIER||321||YML016C|||YML016C|),UPSTREAM(MODIFIER||333||YML016C|||YML016C|)	CTTTTTTTTTTTTTTC	CTTATTTTTTTTTTTTC	NA	10	2	0	1	Upstream	B8	1
Chr13	224182	YML016C	UPSTREAM(MODIFIER||318||YML016C|||YML016C|),UPSTREAM(MODIFIER||321||YML016C|||YML016C|),UPSTREAM(MODIFIER||333||YML016C|||YML016C|)	CTTTTTTTTTTTTTTC	CTTTTTTTTTTTTTTTC	NA	10	6	0	1	Upstream	B8	1
Chr13	224182	YML016C	UPSTREAM(MODIFIER||318||YML016C|||YML016C|),UPSTREAM(MODIFIER||321||YML016C|||YML016C|),UPSTREAM(MODIFIER||333||YML016C|||YML016C|)	CTTTTTTTTTTTTTTC	TTTTTTTTTTTTTTTC	NA	10	2	0	1	Upstream	B8	1
Chr13	243958	NA	NA	G	A	NA	36	28	7	0.8	Other	A8	9
Chr13	52164	NA	NA	G	A	NA	81	69	12	0.851851851851852	Other	A7	15
Chr13	52164	NA	NA	G	A	NA	31	20	11	0.645161290322581	Other	A7	2
Chr13	52164	NA	NA	G	A	NA	53	36	17	0.679245283018868	Other	A7	7
Chr13	52164	NA	NA	G	A	NA	66	54	11	0.830769230769231	Other	A7	9
Chr13	738939	YMR243C	UPSTREAM(MODIFIER||89||YMR243C|||YMR243C|)	T	A	NA	66	53	13	0.803030303030303	Upstream	A7	15
Chr13	922917	NA	NA	TT	TAT	NA	27	6	4	0.6	Other	B5	15
Chr14	476331	YNL179C,YNL180C	UPSTREAM(MODIFIER||306||YNL180C|||YNL180C|)	A	T	I53F,NA	13	12	1	0.923076923076923	Upstream	B5	3
Chr14	622323	YNL261W	UPSTREAM(MODIFIER||163||YNL261W|||YNL261W|),UPSTREAM(MODIFIER||174||YNL261W|||YNL261W|)	GTTTTTTTTTTTTTTTTTTC	GTTTTTTTATTTTTTTTTTTC	NA	11	2	1	0.666666666666667	Upstream	A8	15
Chr14	622323	YNL261W	UPSTREAM(MODIFIER||163||YNL261W|||YNL261W|),UPSTREAM(MODIFIER||174||YNL261W|||YNL261W|)	GTTTTTTTTTTTTTTTTTTC	GTTTTTTTTTTTTTTTTTTTC	NA	11	3	1	0.75	Upstream	A8	15
Chr15	489743	YOR136W	SYNONYMOUS_CODING(LOW|SILENT|ggT/ggA|G304|YOR136W|||YOR136W|1)	A	T	G304	21	11	10	0.523809523809524	Synonymous	A7	1
Chr15	960824	NA	NA	AT	ATCATTAGT	NA	10	2	0	1	Other	B5	9
Chr15	445737	YOR156C	UPSTREAM(MODIFIER||221||YOR156C|||YOR156C|)	C	A	NA	23	10	11	0.476190476190476	Upstream	A7	2
Chr15	542521	YOR110W	UPSTREAM(MODIFIER||230||YOR110W|||YOR110W|)	C	A	NA	88	83	4	0.954022988505747	Upstream	A7	5
Chr15	542521	YOR110W	UPSTREAM(MODIFIER||230||YOR110W|||YOR110W|)	C	A	NA	161	155	5	0.96875	Upstream	A7	15
Chr15	542521	YOR110W	UPSTREAM(MODIFIER||230||YOR110W|||YOR110W|)	C	A	NA	140	139	1	0.992857142857143	Upstream	A7	7
Chr15	542521	YOR110W	UPSTREAM(MODIFIER||230||YOR110W|||YOR110W|)	C	A	NA	138	133	5	0.963768115942029	Upstream	A7	9
Chr15	373291	YOR192C-C	NON_SYNONYMOUS_CODING(MODERATE|MISSENSE|aCa/aTa|T36I|YOR192C-C|||YOR192C-C|1|WARNING_TRANSCRIPT_MULTIPLE_STOP_CODONS)	C	T	T36I	35	19	16	0.542857142857143	Non-Synonymous	A7	1
Chr15	100006	YOR349W	UPSTREAM(MODIFIER||69||YOR349W|||YOR349W|),UPSTREAM(MODIFIER||84||YOR349W|||YOR349W|)	CTTTTTTTTTTTTTTC	CTTTTTTTTTTTTTTTC	NA	17	5	0	1	Upstream	B8	1
Chr15	100006	YOR349W	UPSTREAM(MODIFIER||69||YOR349W|||YOR349W|),UPSTREAM(MODIFIER||84||YOR349W|||YOR349W|)	CTTTTTTTTTTTTTTC	TTTTTTTTTTTTTTTC	NA	17	5	0	1	Upstream	B8	1
Chr15	422294	YOR171C,YOR172W	UPSTREAM(MODIFIER||318||YOR171C|||YOR171C|),UPSTREAM(MODIFIER||8||YOR172W|||YOR172W|)	T	A	NA,NA	13	13	0	1	Upstream	A7	7
Chr15	422294	YOR171C,YOR172W	UPSTREAM(MODIFIER||318||YOR171C|||YOR171C|),UPSTREAM(MODIFIER||8||YOR172W|||YOR172W|)	T	A	NA,NA	12	12	0	1	Upstream	A7	9
Chr15	801458	NA	NA	T	A	NA	18	18	0	1	Other	A7	9
Chr15	1091	NA	NA	T	C	NA	10	7	3	0.7	Other	A7	15
Chr15	412043	NA	NA	T	C	NA	21	15	6	0.714285714285714	Other	A7	5
Chr16	156678	YPR120C	UPSTREAM(MODIFIER||192||YPR120C|||YPR120C|)	C	A	NA	22	14	8	0.636363636363636	Upstream	A7	15
Chr16	798104	YPL218W	UPSTREAM(MODIFIER||384||YPL218W|||YPL218W|),UPSTREAM(MODIFIER||390||YPL218W|||YPL218W|)	CAAAAAAAAAT	AAAAAAAAAAT	NA	11	8	0	1	Upstream	A7	2
Chr16	798104	YPL218W	UPSTREAM(MODIFIER||384||YPL218W|||YPL218W|),UPSTREAM(MODIFIER||390||YPL218W|||YPL218W|)	CAAAAAAAAAT	CAAAAAAAAAAT	NA	11	2	0	1	Upstream	A7	2
Chr16	321797	YPR026W	UPSTREAM(MODIFIER||104||YPR026W|||YPR026W|),UPSTREAM(MODIFIER||122||YPR026W|||YPR026W|),UPSTREAM(MODIFIER||123||YPR026W|||YPR026W|)	CTTTTTTTTTTTTTTTTTTA	CTTTTTTTTTTTTTTTTTA	NA	14	3	1	0.75	Upstream	B5	2
Chr16	321797	YPR026W	UPSTREAM(MODIFIER||104||YPR026W|||YPR026W|),UPSTREAM(MODIFIER||122||YPR026W|||YPR026W|),UPSTREAM(MODIFIER||123||YPR026W|||YPR026W|)	CTTTTTTTTTTTTTTTTTTA	CTTTTTTTTTTTTTTTTTTT	NA	14	4	1	0.8	Upstream	B5	2
Chr16	155337	NA	NA	G	A	NA	60	33	27	0.55	Other	A7	7
Chr16	582017	YPL105C	SYNONYMOUS_CODING(LOW|SILENT|ttG/ttA|L207|YPL105C|||YPL105C|1)	G	A	L207	18	13	5	0.722222222222222	Synonymous	A7	5
Chr16	582017	YPL105C	SYNONYMOUS_CODING(LOW|SILENT|ttG/ttA|L207|YPL105C|||YPL105C|1)	G	A	L207	16	16	0	1	Synonymous	A7	7
Chr16	582017	YPL105C	SYNONYMOUS_CODING(LOW|SILENT|ttG/ttA|L207|YPL105C|||YPL105C|1)	G	A	L207	26	26	0	1	Synonymous	A7	9
Chr16	582017	YPL105C	SYNONYMOUS_CODING(LOW|SILENT|ttG/ttA|L207|YPL105C|||YPL105C|1)	G	A	L207	15	15	0	1	Synonymous	A7	15
Chr16	743545	NA	NA	G	A	NA	16	13	3	0.8125	Other	A8	9
Chr16	743545	NA	NA	G	A	NA	18	16	2	0.888888888888889	Other	A7	5
Chr16	932188	NA	NA	GGTGTGTGTG	GGTGTGGGTGTG	NA	22	4	0	1	Other	B12	4
Chr16	932188	NA	NA	GGTGTGTGTG	GGTGTGTG	NA	22	4	0	1	Other	B12	4
Chr16	932188	NA	NA	GGTGTGTGTG	GGTGTGTGG	NA	22	3	0	1	Other	B12	4
Chr16	932188	NA	NA	GGTGTGTGTG	GGTGTGTGTGG	NA	22	8	0	1	Other	B12	4
Chr16	862249	YPL252C	UPSTREAM(MODIFIER||302||YPL252C|||YPL252C|),UPSTREAM(MODIFIER||310||YPL252C|||YPL252C|),UPSTREAM(MODIFIER||318||YPL252C|||YPL252C|)	GTTTTTTTTTTTTTTTA	GTTTTTTTCTTTTTTTTA	NA	15	2	1	0.666666666666667	Upstream	B5	2
Chr16	862249	YPL252C	UPSTREAM(MODIFIER||302||YPL252C|||YPL252C|),UPSTREAM(MODIFIER||310||YPL252C|||YPL252C|),UPSTREAM(MODIFIER||318||YPL252C|||YPL252C|)	GTTTTTTTTTTTTTTTA	GTTTTTTTTTTTTTTTTA	NA	15	4	1	0.8	Upstream	B5	2
Chr16	862249	YPL252C	UPSTREAM(MODIFIER||302||YPL252C|||YPL252C|),UPSTREAM(MODIFIER||310||YPL252C|||YPL252C|),UPSTREAM(MODIFIER||318||YPL252C|||YPL252C|)	GTTTTTTTTTTTTTTTA	TTTTTTTTTTTTTTTTA	NA	15	4	1	0.8	Upstream	B5	2
Chr16	345336	NA	NA	T	G	NA	37	31	6	0.837837837837838	Other	A7	15
Chr16	289516	YPR035W	UPSTREAM(MODIFIER||26||YPR035W|||YPR035W|)	TGT	TAT	NA	247	176	29	0.858536585365854	Upstream	A7	2
Chr16	289516	YPR035W	UPSTREAM(MODIFIER||26||YPR035W|||YPR035W|)	TGT	TAT	NA	108	46	30	0.605263157894737	Upstream	A7	7
Chr16	289516	YPR035W	UPSTREAM(MODIFIER||26||YPR035W|||YPR035W|)	TGT	TT	NA	247	35	29	0.546875	Upstream	A7	2
Chr16	289516	YPR035W	UPSTREAM(MODIFIER||26||YPR035W|||YPR035W|)	TGT	TT	NA	108	26	30	0.464285714285714	Upstream	A7	7
Chr16	289516	YPR035W	UPSTREAM(MODIFIER||26||YPR035W|||YPR035W|)	TGT	TT	NA	78	37	18	0.672727272727273	Upstream	A7	15
Chr16	289516	YPR035W	UPSTREAM(MODIFIER||26||YPR035W|||YPR035W|)	TGT	TTT	NA	78	17	18	0.485714285714286	Upstream	A7	15
Chr2	557011	NA	NA	ATTTTTTTTA	ATATTTTTTTA	NA	16	2	0	1	Other	B5	2
Chr2	557011	NA	NA	ATTTTTTTTA	ATTTTTTTTTA	NA	16	14	0	1	Other	B5	2
Chr2	449794	NA	NA	C	T	NA	25	20	5	0.8	Other	A7	4
Chr2	676218	NA	NA	CTTTTTTTTTTTTTTTTTA	CTTTTTTTTTTTTTTTTTT	NA	17	3	0	1	Other	B5	1
Chr2	676218	NA	NA	CTTTTTTTTTTTTTTTTTA	TTTTTTTTTTTTTTTTTTA	NA	17	12	0	1	Other	B5	1
Chr2	219603	YBR182C	UPSTREAM(MODIFIER||110||YBR182C|||YBR182C|)	G	A	NA	166	165	0	1	Upstream	A8	15
Chr3	164745	YCR018C-A	NON_SYNONYMOUS_CODING(MODERATE|MISSENSE|Act/Gct|T73A|YCR018C-A|||YCR018C-A|1)	A	G	T73A	16	13	3	0.8125	Non-Synonymous	A8	9
Chr3	164765	YCR018C-A	NON_SYNONYMOUS_CODING(MODERATE|MISSENSE|ttC/ttA|F79L|YCR018C-A|||YCR018C-A|1)	C	A	F79L	19	14	5	0.736842105263158	Non-Synonymous	A8	9
Chr3	164765	YCR018C-A	NON_SYNONYMOUS_CODING(MODERATE|MISSENSE|ttC/ttA|F79L|YCR018C-A|||YCR018C-A|1)	C	A	F79L	37	24	13	0.648648648648649	Non-Synonymous	A7	1
Chr3	164746	YCR018C-A	NON_SYNONYMOUS_CODING(MODERATE|MISSENSE|aCt/aTt|T73I|YCR018C-A|||YCR018C-A|1)	C	T	T73I	16	13	3	0.8125	Non-Synonymous	A8	9
Chr3	164762	YCR018C-A	SYNONYMOUS_CODING(LOW|SILENT|aaC/aaT|N78|YCR018C-A|||YCR018C-A|1)	C	T	N78	19	14	5	0.736842105263158	Synonymous	A8	9
Chr3	264363	NA	NA	G	T	NA	12	7	5	0.583333333333333	Other	A8	15
Chr3	318949	NA	NA	GGGTGTGGTGTGGTGTG	GGGTGTGGTGTG	NA	11	2	1	0.666666666666667	Other	B8	1
Chr3	318949	NA	NA	GGGTGTGGTGTGGTGTG	GGGTGTGGTGTGG	NA	11	2	1	0.666666666666667	Other	B8	1
Chr3	318949	NA	NA	GGGTGTGGTGTGGTGTG	GGGTGTGTGTGTGGTGTG	NA	11	3	1	0.75	Other	B8	1
Chr3	164757	YCR018C-A	NON_SYNONYMOUS_CODING(MODERATE|MISSENSE|Tct/Act|S77T|YCR018C-A|||YCR018C-A|1)	T	A	S77T	19	14	5	0.736842105263158	Non-Synonymous	A8	9
Chr3	164757	YCR018C-A	NON_SYNONYMOUS_CODING(MODERATE|MISSENSE|Tct/Act|S77T|YCR018C-A|||YCR018C-A|1)	T	A	S77T	38	25	13	0.657894736842105	Non-Synonymous	A7	1
Chr3	319122	NA	NA	TGG	TG	NA	10	2	1	0.666666666666667	Other	B8	15
Chr3	319122	NA	NA	TGG	TGGG	NA	10	2	1	0.666666666666667	Other	B8	15
Chr3	319122	NA	NA	TGG	TGT	NA	10	2	1	0.666666666666667	Other	B8	15
Chr3	319122	NA	NA	TGG	TGTG	NA	10	2	1	0.666666666666667	Other	B8	15
Chr4	1040339	YDR002W,YDR001C	UPSTREAM(MODIFIER||127||YDR002W|||YDR002W|),UPSTREAM(MODIFIER||136||YDR002W|||YDR002W|),UPSTREAM(MODIFIER||138||YDR002W|||YDR002W|),UPSTREAM(MODIFIER||432||YDR001C|||YDR001C|),UPSTREAM(MODIFIER||434||YDR001C|||YDR001C|),UPSTREAM(MODIFIER||443||YDR001C|||YDR001C|)	ATTTTTTTTTTG	ATTTTTTTTCTTG	NA,NA	10	2	0	1	Upstream	B12	4
Chr4	1040339	YDR002W,YDR001C	UPSTREAM(MODIFIER||127||YDR002W|||YDR002W|),UPSTREAM(MODIFIER||136||YDR002W|||YDR002W|),UPSTREAM(MODIFIER||138||YDR002W|||YDR002W|),UPSTREAM(MODIFIER||432||YDR001C|||YDR001C|),UPSTREAM(MODIFIER||434||YDR001C|||YDR001C|),UPSTREAM(MODIFIER||443||YDR001C|||YDR001C|)	ATTTTTTTTTTG	ATTTTTTTTTTTG	NA,NA	10	6	0	1	Upstream	B12	4
Chr4	1040339	YDR002W,YDR001C	UPSTREAM(MODIFIER||127||YDR002W|||YDR002W|),UPSTREAM(MODIFIER||136||YDR002W|||YDR002W|),UPSTREAM(MODIFIER||138||YDR002W|||YDR002W|),UPSTREAM(MODIFIER||432||YDR001C|||YDR001C|),UPSTREAM(MODIFIER||434||YDR001C|||YDR001C|),UPSTREAM(MODIFIER||443||YDR001C|||YDR001C|)	ATTTTTTTTTTG	TTTTTTTTTTTG	NA,NA	10	2	0	1	Upstream	B12	4
Chr4	1494139	YER188C-A	NON_SYNONYMOUS_CODING(MODERATE|MISSENSE|gGc/gAc|G46D|YER188C-A|||YER188C-A|1|WARNING_TRANSCRIPT_MULTIPLE_STOP_CODONS)	C	T	G46D	11	8	3	0.727272727272727	Non-Synonymous	A7	7
Chr4	672694	YDR186C	UPSTREAM(MODIFIER||146||YDR186C|||YDR186C|)	CTTTTTTTTTTTTTTC	CTTTTTTTTTTTTTTT	NA	18	2	0	1	Upstream	B5	2
Chr4	672694	YDR186C	UPSTREAM(MODIFIER||146||YDR186C|||YDR186C|)	CTTTTTTTTTTTTTTC	CTTTTTTTTTTTTTTTC	NA	18	12	0	1	Upstream	B5	2
Chr4	1055629	YDL007W	UPSTREAM(MODIFIER||423||YDL007W|||YDL007W|)	G	A	NA	30	22	8	0.733333333333333	Upstream	A7	1
Chr4	1055629	YDL007W	UPSTREAM(MODIFIER||423||YDL007W|||YDL007W|)	G	A	NA	39	26	13	0.666666666666667	Upstream	A7	7
Chr4	1325578	YDL160C-A	UPSTREAM(MODIFIER||306||YDL160C-A|||YDL160C-A|)	G	A	NA	17	8	7	0.533333333333333	Upstream	B12	2
Chr4	1055648	YDL007W	UPSTREAM(MODIFIER||442||YDL007W|||YDL007W|)	G	T	NA	18	12	6	0.666666666666667	Upstream	A7	7
Chr4	1325578	YDL160C-A	UPSTREAM(MODIFIER||306||YDL160C-A|||YDL160C-A|)	G	T	NA	17	2	7	0.222222222222222	Upstream	B12	2
Chr4	689712	NA	NA	G	T	NA	55	48	6	0.888888888888889	Other	A7	1
Chr4	727665	YDR161W	UPSTREAM(MODIFIER||200||YDR161W|||YDR161W|)	G	T	NA	48	45	3	0.9375	Upstream	A8	9
Chr4	610482	YDR222W	UPSTREAM(MODIFIER||326||YDR222W|||YDR222W|),UPSTREAM(MODIFIER||327||YDR222W|||YDR222W|)	GAAAAAAAAAAAAAAAAAAAT	GAAAAAAAAAAAAAAAAAAAA	NA	10	9	0	1	Upstream	B5	15
Chr4	610482	YDR222W	UPSTREAM(MODIFIER||326||YDR222W|||YDR222W|),UPSTREAM(MODIFIER||327||YDR222W|||YDR222W|)	GAAAAAAAAAAAAAAAAAAAT	GAAAAAAAAAAAAAAAAAAT	NA	10	1	0	1	Upstream	B5	15
Chr4	1065640	YDL015C,YDL014W	UPSTREAM(MODIFIER||171||YDL015C|||YDL015C|),UPSTREAM(MODIFIER||176||YDL015C|||YDL015C|),UPSTREAM(MODIFIER||183||YDL015C|||YDL015C|),UPSTREAM(MODIFIER||246||YDL014W|||YDL014W|),UPSTREAM(MODIFIER||253||YDL014W|||YDL014W|),UPSTREAM(MODIFIER||258||YDL014W|||YDL014W|)	GAAAAAAAAAAAG	AAAAAAAAAAAAG	NA,NA	12	3	0	1	Upstream	B8	5
Chr4	1065640	YDL015C,YDL014W	UPSTREAM(MODIFIER||171||YDL015C|||YDL015C|),UPSTREAM(MODIFIER||176||YDL015C|||YDL015C|),UPSTREAM(MODIFIER||183||YDL015C|||YDL015C|),UPSTREAM(MODIFIER||246||YDL014W|||YDL014W|),UPSTREAM(MODIFIER||253||YDL014W|||YDL014W|),UPSTREAM(MODIFIER||258||YDL014W|||YDL014W|)	GAAAAAAAAAAAG	GAAAAAAAAAAAAG	NA,NA	12	6	0	1	Upstream	B8	5
Chr4	1065640	YDL015C,YDL014W	UPSTREAM(MODIFIER||171||YDL015C|||YDL015C|),UPSTREAM(MODIFIER||176||YDL015C|||YDL015C|),UPSTREAM(MODIFIER||183||YDL015C|||YDL015C|),UPSTREAM(MODIFIER||246||YDL014W|||YDL014W|),UPSTREAM(MODIFIER||253||YDL014W|||YDL014W|),UPSTREAM(MODIFIER||258||YDL014W|||YDL014W|)	GAAAAAAAAAAAG	GAAAAAAGAAAAAG	NA,NA	12	2	0	1	Upstream	B8	5
Chr4	1055638	YDL007W	UPSTREAM(MODIFIER||432||YDL007W|||YDL007W|)	T	A	NA	32	20	12	0.625	Upstream	A7	2
Chr4	1055638	YDL007W	UPSTREAM(MODIFIER||432||YDL007W|||YDL007W|)	T	A	NA	23	17	6	0.739130434782609	Upstream	A7	1
Chr4	1055638	YDL007W	UPSTREAM(MODIFIER||432||YDL007W|||YDL007W|)	T	A	NA	35	27	8	0.771428571428571	Upstream	A7	7
Chr4	1346349	YDL172C	UPSTREAM(MODIFIER||36||YDL172C|||YDL172C|)	TT	TAT	NA	77	45	32	0.584415584415584	Upstream	B12	5
Chr4	1346349	YDL172C	UPSTREAM(MODIFIER||36||YDL172C|||YDL172C|)	TT	TAT	NA	199	149	50	0.748743718592965	Upstream	B12	4
Chr4	235002	YDR414C	UPSTREAM(MODIFIER||82||YDR414C|||YDR414C|)	TT	TAT	NA	107	21	15	0.583333333333333	Upstream	A7	15
Chr4	235002	YDR414C	UPSTREAM(MODIFIER||82||YDR414C|||YDR414C|)	TT	TAT	NA	76	18	14	0.5625	Upstream	A7	9
Chr4	235002	YDR414C	UPSTREAM(MODIFIER||82||YDR414C|||YDR414C|)	TT	TAT	NA	84	23	12	0.657142857142857	Upstream	A7	7
Chr5	127315	YER138W-A	UPSTREAM(MODIFIER||311||YER138W-A|||YER138W-A|)	A	T	NA	31	20	11	0.645161290322581	Upstream	A7	1
Chr5	204089	YER105C	SYNONYMOUS_CODING(LOW|SILENT|tcC/tcA|S87|YER105C|||YER105C|1)	C	A	S87	47	32	15	0.680851063829787	Synonymous	A7	15
Chr5	171346	YER122C,YER123W	UPSTREAM(MODIFIER||136||YER122C|||YER122C|),UPSTREAM(MODIFIER||324||YER123W|||YER123W|)	GAAAAAAAAAAAAAAAAAG	GAAAAAAAAAAAAAAAAAA	NA,NA	18	11	0	1	Upstream	A8	1
Chr5	171346	YER122C,YER123W	UPSTREAM(MODIFIER||136||YER122C|||YER122C|),UPSTREAM(MODIFIER||324||YER123W|||YER123W|)	GAAAAAAAAAAAAAAAAAG	GAAAAAAAAAAAAAAAAAAG	NA,NA	18	3	0	1	Upstream	A8	1
Chr5	432091	YEL007W	NON_SYNONYMOUS_CODING(MODERATE|MISSENSE|Aat/Tat|N363Y|YEL007W|||YEL007W|1)	T	A	N363Y	45	40	5	0.888888888888889	Non-Synonymous	A7	9
Chr5	432091	YEL007W	NON_SYNONYMOUS_CODING(MODERATE|MISSENSE|Aat/Tat|N363Y|YEL007W|||YEL007W|1)	T	A	N363Y	608	584	24	0.960526315789474	Non-Synonymous	B5	15
Chr5	432091	YEL007W	NON_SYNONYMOUS_CODING(MODERATE|MISSENSE|Aat/Tat|N363Y|YEL007W|||YEL007W|1)	T	A	N363Y	100	91	9	0.91	Non-Synonymous	B8	15
Chr5	432091	YEL007W	NON_SYNONYMOUS_CODING(MODERATE|MISSENSE|Aat/Tat|N363Y|YEL007W|||YEL007W|1)	T	A	N363Y	48	39	9	0.8125	Non-Synonymous	A7	7
Chr5	432091	YEL007W	NON_SYNONYMOUS_CODING(MODERATE|MISSENSE|Aat/Tat|N363Y|YEL007W|||YEL007W|1)	T	A	N363Y	100	85	15	0.85	Non-Synonymous	A7	15
Chr5	432091	YEL007W	NON_SYNONYMOUS_CODING(MODERATE|MISSENSE|Aat/Tat|N363Y|YEL007W|||YEL007W|1)	T	A	N363Y	330	288	42	0.872727272727273	Non-Synonymous	B5	7
Chr5	432091	YEL007W	NON_SYNONYMOUS_CODING(MODERATE|MISSENSE|Aat/Tat|N363Y|YEL007W|||YEL007W|1)	T	A	N363Y	100	76	24	0.76	Non-Synonymous	B5	9
Chr5	325350	NA	NA	T	C	NA	53	28	25	0.528301886792453	Other	A7	9
Chr7	62	NA	NA	ACACCACA	ACACACACACA	NA	16	4	0	1	Other	B12	15
Chr7	64	NA	NA	ACC	ACAC	NA	10	2	2	0.5	Other	B8	3
Chr7	68864	NA	NA	ATA	AA	NA	10	6	4	0.6	Other	A7	5
Chr7	68864	NA	NA	ATA	AA	NA	30	20	10	0.666666666666667	Other	A7	3
Chr7	350825	NA	NA	C	T	NA	81	67	13	0.8375	Other	A7	4
Chr7	350825	NA	NA	C	T	NA	44	38	6	0.863636363636364	Other	A7	5
Chr7	946651	YGL194C-A	UPSTREAM(MODIFIER||347||YGL194C-A|||YGL194C-A|)	C	T	NA	10	7	3	0.7	Upstream	B5	2
Chr7	660149	YGL037C,YGL036W	UPSTREAM(MODIFIER||141||YGL037C|||YGL037C|),UPSTREAM(MODIFIER||155||YGL037C|||YGL037C|),UPSTREAM(MODIFIER||496||YGL036W|||YGL036W|)	CTATATATATATATAT	TTATATATATATATAT	NA,NA	12	11	1	0.916666666666667	Upstream	A7	1
Chr7	452388	YGR084C	NON_SYNONYMOUS_CODING(MODERATE|MISSENSE|Gga/Aga|G2R|YGR084C|||YGR084C|1)	G	A	G2R	90	89	1	0.988888888888889	Non-Synonymous	B5	15
Chr7	452388	YGR084C	NON_SYNONYMOUS_CODING(MODERATE|MISSENSE|Gga/Aga|G2R|YGR084C|||YGR084C|1)	G	A	G2R	65	64	1	0.984615384615385	Non-Synonymous	B5	9
Chr7	452388	YGR084C	NON_SYNONYMOUS_CODING(MODERATE|MISSENSE|Gga/Aga|G2R|YGR084C|||YGR084C|1)	G	A	G2R	65	51	14	0.784615384615385	Non-Synonymous	B5	7
Chr7	638194	YGL024W,YGL025C	SYNONYMOUS_CODING(LOW|SILENT|atC/atA|I108|YGL024W|||YGL024W|1),SYNONYMOUS_CODING(LOW|SILENT|atC/atT|I108|YGL024W|||YGL024W|1),UPSTREAM(MODIFIER||154||YGL025C|||YGL025C|)	G	A	I108,NA	114	56	12	0.823529411764706	Synonymous	A7	7
Chr7	638194	YGL024W,YGL025C	SYNONYMOUS_CODING(LOW|SILENT|atC/atA|I108|YGL024W|||YGL024W|1),SYNONYMOUS_CODING(LOW|SILENT|atC/atT|I108|YGL024W|||YGL024W|1),UPSTREAM(MODIFIER||154||YGL025C|||YGL025C|)	G	A	I108,NA	174	104	9	0.920353982300885	Synonymous	A7	15
Chr7	638194	YGL024W,YGL025C	SYNONYMOUS_CODING(LOW|SILENT|atC/atA|I108|YGL024W|||YGL024W|1),SYNONYMOUS_CODING(LOW|SILENT|atC/atT|I108|YGL024W|||YGL024W|1),UPSTREAM(MODIFIER||154||YGL025C|||YGL025C|)	G	A	I108,NA	112	71	8	0.89873417721519	Synonymous	A7	9
Chr7	656827	NA	NA	G	A	NA	61	57	4	0.934426229508197	Other	A8	9
Chr7	638194	YGL024W,YGL025C	SYNONYMOUS_CODING(LOW|SILENT|atC/atA|I108|YGL024W|||YGL024W|1),SYNONYMOUS_CODING(LOW|SILENT|atC/atT|I108|YGL024W|||YGL024W|1),UPSTREAM(MODIFIER||154||YGL025C|||YGL025C|)	G	T	I108,NA	114	46	12	0.793103448275862	Synonymous	A7	7
Chr7	638194	YGL024W,YGL025C	SYNONYMOUS_CODING(LOW|SILENT|atC/atA|I108|YGL024W|||YGL024W|1),SYNONYMOUS_CODING(LOW|SILENT|atC/atT|I108|YGL024W|||YGL024W|1),UPSTREAM(MODIFIER||154||YGL025C|||YGL025C|)	G	T	I108,NA	112	33	8	0.804878048780488	Synonymous	A7	9
Chr7	638194	YGL024W,YGL025C	SYNONYMOUS_CODING(LOW|SILENT|atC/atA|I108|YGL024W|||YGL024W|1),SYNONYMOUS_CODING(LOW|SILENT|atC/atT|I108|YGL024W|||YGL024W|1),UPSTREAM(MODIFIER||154||YGL025C|||YGL025C|)	G	T	I108,NA	174	61	9	0.871428571428571	Synonymous	A7	15
Chr7	390133	YGR111W	UPSTREAM(MODIFIER||102||YGR111W|||YGR111W|),UPSTREAM(MODIFIER||108||YGR111W|||YGR111W|)	GTTTTTTTTTTC	GTTTTCTTTTTTC	NA	11	2	0	1	Upstream	A7	5
Chr7	390133	YGR111W	UPSTREAM(MODIFIER||102||YGR111W|||YGR111W|),UPSTREAM(MODIFIER||108||YGR111W|||YGR111W|)	GTTTTTTTTTTC	GTTTTTTTTTTTC	NA	11	9	0	1	Upstream	A7	5
Chr8	83327	YHR180W-A	UPSTREAM(MODIFIER||334||YHR180W-A|||YHR180W-A||WARNING_TRANSCRIPT_INCOMPLETE)	A	G	NA	114	66	48	0.578947368421053	Upstream	A7	1
Chr8	83327	YHR180W-A	UPSTREAM(MODIFIER||334||YHR180W-A|||YHR180W-A||WARNING_TRANSCRIPT_INCOMPLETE)	A	G	NA	98	49	49	0.5	Upstream	A7	3
Chr8	392241	NA	NA	A	T	NA	113	67	46	0.592920353982301	Other	A7	9
Chr8	356617	NA	NA	ATGA	AA	NA	26	3	3	0.5	Other	A8	9
Chr8	356617	NA	NA	ATGA	AAAA	NA	26	3	3	0.5	Other	A8	9
Chr8	356617	NA	NA	ATGA	ATAA	NA	26	16	3	0.842105263157895	Other	A8	9
Chr8	129060	YHR161C	NON_SYNONYMOUS_CODING(MODERATE|MISSENSE|gCa/gTa|A473V|YHR161C|||YHR161C|1|WARNING_TRANSCRIPT_MULTIPLE_STOP_CODONS)	C	T	A473V	14	9	5	0.642857142857143	Non-Synonymous	A7	2
Chr8	378464	YHR033W,YHR032C-A	UPSTREAM(MODIFIER||134||YHR033W|||YHR033W|),UPSTREAM(MODIFIER||73||YHR032C-A|||YHR032C-A|)	G	T	NA,NA	16	14	1	0.933333333333333	Upstream	A7	15
Chr9	259735	NA	NA	ATTTTTTTC	ATCTTTTTTC	NA	20	2	0	1	Other	B12	2
Chr9	259735	NA	NA	ATTTTTTTC	ATTTTTTTTC	NA	20	16	0	1	Other	B12	2
Chr9	386881	YIR019C	STOP_GAINED(HIGH|NONSENSE|Gaa/Taa|E764*|YIR019C|||YIR019C|1|WARNING_TRANSCRIPT_MULTIPLE_STOP_CODONS)	C	A	E764*	88	77	11	0.875	Stop Gain	B5	15
Chr9	386881	YIR019C	STOP_GAINED(HIGH|NONSENSE|Gaa/Taa|E764*|YIR019C|||YIR019C|1|WARNING_TRANSCRIPT_MULTIPLE_STOP_CODONS)	C	A	E764*	41	26	15	0.634146341463415	Stop Gain	B5	7
Chr9	386881	YIR019C	STOP_GAINED(HIGH|NONSENSE|Gaa/Taa|E764*|YIR019C|||YIR019C|1|WARNING_TRANSCRIPT_MULTIPLE_STOP_CODONS)	C	A	E764*	64	49	15	0.765625	Stop Gain	B5	9
