# Supplementary material for: Genetically controlled mtDNA deletions prevent ROS damage by arresting oxidative phosphorylation
Source: eLife. 2022 Jul 8;11:e76095. doi: 10.7554/eLife.76095 (PMC9427111; doi:10.7554/eLife.76095)
Supplement: Figure 6—figure supplement 4—source data 2. — Data are shown in Figure 6—figure supplement 4A. [file elife-76095-fig6-figsupp4-data2.xlsx]

## Sheet: Data S22 - MIP1 phenotypes
README: mip1∆ paraquat: Spatial control doubling time used for normalization: 4.771126h
Strain	N	Environment	Mean doubling time	Doubling time S.D
mip1∆	72	Paraquat	3.5424224491135594	0.846558199870726
Founder	767	Basal	1.5469526241806926	0.07530753421045722
