# Supplementary material for: Genetically controlled mtDNA deletions prevent ROS damage by arresting oxidative phosphorylation
Source: eLife. 2022 Jul 8;11:e76095. doi: 10.7554/eLife.76095 (PMC9427111; doi:10.7554/eLife.76095)
Supplement: Figure 6—figure supplement 5—source data 1. — Data are shown in Figure 6—figure supplement 5A and in Figure 6—figure supplement 4B. [file elife-76095-fig6-figsupp5-data1.xlsx]

## Sheet: Data S11 - End point cov.
README: Mean/median of all 100bp windows over each chromsome displayed in Fig S10A with color scale capped at -1/1
Chromosome	Population	Log2 coverage mean	SD Log2 coverage	Log2 coverage median
Chr1	A1	0.130742465456304	0.680651336284505	0.054969091522
Chr1	A11	0.0371193993420949	0.697734856204464	0
Chr1	A12	0.169229471967483	0.652905443680081	0.0991006107176
Chr1	A2	0.166015969045058	0.737668586506772	0.115886939452
Chr1	A4	0.0573571966234223	0.697813222328112	0
Chr1	A7	0.270777448129656	0.678037339032275	0.212841636645
Chr1	A8	0.190966077637819	0.715053144378329	0.122410772749
Chr1	A9	0.177392560722987	0.801954600180674	0.119874761423
Chr1	B1	-0.0901231126847551	0.714669745308607	-0.0821731105232
Chr1	B10	0.0172246061139138	0.702545585971409	0
Chr1	B11	0.122165123314211	0.693727042503644	0.063339388209
Chr1	B12	-0.0182602125486658	0.700804428235133	-0.00959194810019
Chr1	B3	-0.017179785097338	0.759310181617682	0
Chr1	B4	0.204320960615442	0.710176608145445	0.143197756342
Chr1	B5	0.0722373558447669	0.725034957091449	0.00458579361002
Chr1	B6	0.0498224081105633	0.679146146807967	0
Chr1	B8	0.173113938348321	0.676568195843669	0.141988310402
Chr1	B9	0.0767415914056586	0.714201493325919	0.0191204885541
Chr1	C1	0.204350260608289	0.683132695847639	0.156282880109
Chr1	C10	0.0973224134850899	0.811569801761805	0.044916386105
Chr1	C11	0.0960819643260625	0.718710106689902	0.0376466136064
Chr1	C12	0.0446645089756522	0.687543902993746	0
Chr1	C2	0.153990528454297	0.69319773357743	0.09159783462
Chr1	C3	0.10740446122051	0.672026965070785	0.0324782450225
Chr1	C4	0.0658927636533512	0.828506133663919	0.0088179836137
Chr1	C5	0.198105589103994	0.716848560384264	0.156134357962
Chr1	C6	0.267513018270908	0.71129436674782	0.223828882283
Chr1	C7	-0.212944779132255	0.720362473762622	-0.222205378441
Chr1	C9	0.0528399511738813	0.681340041378059	0
Chr1	D1	0.0346980651988402	0.697643293318911	0
Chr1	D10	0.0701115893060125	0.708438790878036	0.0066138611728
Chr1	D11	0.257965366411289	0.774958159028146	0.193553280854
Chr1	D12	0.251666736951128	0.70093121662167	0.190844636466
Chr1	D2	0.0250004502657052	0.739122007693259	0
Chr1	D3	0.0385869842154282	0.715275889267664	0
Chr1	D4	-0.112869768986358	0.901161333893244	-0.0597297164357
Chr1	D5	0.17625458393606	0.767719613376523	0.112008814552
Chr1	D6	0.0343765974864773	0.761336748767583	0
Chr1	D7	0.0503724027223664	0.663775398997091	0
Chr1	D8	0.142757471274392	0.692865714935324	0.0673312949464
Chr1	D9	0.162291468016353	0.733292976080571	0.112344474852
Chr1	A5	0.163962576213402	0.684361934882152	0.107504185095
Chr1	B2	0.150009672008935	0.714275482030338	0.111511810516
Chr1	B7	0.249716409821432	0.71570967109961	0.205736811798
Chr10	A1	0.0355989394665311	0.691873995763567	0
Chr10	A11	0.0922495711430544	0.697772029711244	0.058294298535
Chr10	A12	0.143358173514902	0.687402394235118	0.101025710269
Chr10	A2	0.150731599676139	0.713590074499415	0.122445772247
Chr10	A4	0.0374221199299591	0.690298766091239	0.00540683041231
Chr10	A7	0.110999607030992	0.691067683760322	0.0663836710929
Chr10	A8	0.105046194699409	0.714601702671445	0.0734956123231
Chr10	A9	0.157763062184843	0.776138774074541	0.135494643776
Chr10	B1	-0.0130702397969757	0.701177425990434	-0.0304874809499
Chr10	B10	0.0660978216460427	0.689553811518655	0.0323455702622
Chr10	B11	0.00858774686249304	0.683471496730226	-0.0167087166214
Chr10	B12	0.0418873762528416	0.686060844571612	0.00421881349246
Chr10	B3	0.0225654833673909	0.742947811400076	0
Chr10	B4	0.19201542695211	0.690145371273045	0.157817062887
Chr10	B5	0.0822065183808899	0.702294838242092	0.0468069661668
Chr10	B6	0.0737088924604226	0.687393295348272	0.0428411775439
Chr10	B8	0.0306419456964858	0.682868410307254	0
Chr10	B9	0.0671491955603111	0.708490278965656	0.0282674385392
Chr10	C1	0.166680061058281	0.676852402011461	0.13014074258
Chr10	C10	0.0842784343596785	0.796001056327239	0.0544167358946
Chr10	C11	0.00409224851980956	0.709545746388692	-0.0276137551704
Chr10	C12	0.0251538860651145	0.689885988108189	0
Chr10	C2	0.1607392112272	0.681816571794869	0.124053778786
Chr10	C3	-0.00862591700245191	0.690591790142068	-0.0371506055684
Chr10	C4	0.00246202019182271	0.828700576483701	0
Chr10	C5	0.140445309348286	0.710086615576984	0.113728071419
Chr10	C6	0.183932493995339	0.72265021016652	0.166216041141
Chr10	C7	0.061828017968588	0.683788392595534	0.0206423517631
Chr10	C9	-0.00767079999828064	0.709804489034235	-0.0356204227501
Chr10	D1	0.103721675626198	0.684352234077233	0.0612602248343
Chr10	D10	0.0829038740469291	0.688183884720428	0.0407127629286
Chr10	D11	0.163002072554479	0.751612812650831	0.134188454027
Chr10	D12	0.18307021938801	0.68086529205241	0.136293520358
Chr10	D2	0.0367393370785042	0.71403697308626	0
Chr10	D3	0.0270945317256181	0.711916385077563	0
Chr10	D4	-0.000930604128288124	0.864861504183905	0
Chr10	D5	-0.00841549893234018	0.749073607920163	-0.0323399204078
Chr10	D6	0.0383091790975968	0.714513165404809	0.00818176143943
Chr10	D7	-0.0254683289678202	0.684465992058646	-0.0552287038154
Chr10	D8	0.16109588265353	0.703504924400839	0.124510327987
Chr10	D9	0.166343251596562	0.701650666114823	0.132478515324
Chr10	A5	0.184111287891194	0.671142750709789	0.133476786625
Chr10	B2	0.045435020068449	0.719651512011453	0.0194125542095
Chr10	B7	0.137855779817648	0.704679483164009	0.100198751162
Chr11	A1	0.052287465455755	0.740166417960643	0.0254579285455
Chr11	A11	0.105589786793749	0.733928566142809	0.0752923994593
Chr11	A12	0.181249255074732	0.72383739142661	0.1615607892935
Chr11	A2	0.137928005047052	0.749136162648853	0.114777781147
Chr11	A4	0.0530474329472632	0.721507810329534	0.03154264552955
Chr11	A7	0.122550767903331	0.720766296967704	0.08861018110175
Chr11	A8	0.0735502712344765	0.734481386411606	0.04241949103025
Chr11	A9	0.207267640445847	0.79971738374122	0.1934314458225
Chr11	B1	0.00258222110102859	0.742376384397129	-0.01684140013945
Chr11	B10	0.0750150668181429	0.719577805739159	0.04005167354935
Chr11	B11	0.0301957865854104	0.712099573562233	0.00425344988054
Chr11	B12	0.054840240320312	0.719167106492774	0.01824513485035
Chr11	B3	0.0350155208356067	0.764426942915246	0.0167500513333
Chr11	B4	0.216674947254259	0.727839659376273	0.1897823123145
Chr11	B5	0.0860227482829499	0.737129527106152	0.048734767891
Chr11	B6	0.102170872631012	0.688258592387474	0.07892041026365
Chr11	B8	0.0358715963637144	0.712610823076597	0.003334548576355
Chr11	B9	0.0528774943536026	0.742150607421448	0.03721283702495
Chr11	C1	0.185760261170028	0.71979886338155	0.1533351506825
Chr11	C10	0.101851965697825	0.834329047650311	0.105622670223
Chr11	C11	0.0539592578693543	0.723292890466424	0.017164196763
Chr11	C12	0.0281073493619525	0.714984118644044	-0.004072241520595
Chr11	C2	0.193644615981467	0.720878252458982	0.16362010009
Chr11	C3	0.00570119686345298	0.72333012369511	-0.0291887687859
Chr11	C4	-0.0270718205514712	0.836188743620994	-0.007929688627495
Chr11	C5	0.15150875522965	0.740214692947269	0.126739336832
Chr11	C6	0.224302602992981	0.758898630909525	0.208203408128
Chr11	C7	0.0721243835781536	0.736728112914098	0.0525818846504
Chr11	C9	0.0134612130773676	0.718630830049625	-0.0208872828377
Chr11	D1	0.0858682726461503	0.728144297580244	0.062062242093
Chr11	D10	0.0933357288698912	0.726635248737932	0.0618718828685
Chr11	D11	0.167364964691738	0.781473078122692	0.148833113452
Chr11	D12	0.198605720913765	0.719154469468233	0.171798556265
Chr11	D2	0.050793711820303	0.744519320097326	0.0357968496842
Chr11	D3	0.0427606335557538	0.748719581753177	0.0276535403392
Chr11	D4	0.00468168300798911	0.892926865377364	0.02164955738745
Chr11	D5	-0.0230085457156877	0.800534103680209	-0.03672984710145
Chr11	D6	0.0356299275687571	0.744999622663378	0.01365741567255
Chr11	D7	-0.00967946888416003	0.706808763782033	-0.0315938745249
Chr11	D8	0.136806839333177	0.725274112173954	0.112843049027
Chr11	D9	0.180240698293304	0.739928965282022	0.1560669377385
Chr11	A5	0.205031083124423	0.710318476156735	0.180286159416
Chr11	B2	0.0628955355672463	0.742048185328404	0.0406742594127
Chr11	B7	0.173619361376628	0.738168692578184	0.149333340322
Chr12_part_1	A1	-0.310274730442767	0.746193817336358	-0.3089505974805
Chr12_part_1	A11	-0.0259420286473784	0.697828684664369	-0.0283820987802
Chr12_part_1	A12	-0.0237677674773809	0.720593526856064	-0.019154195794
Chr12_part_1	A2	-0.0119125780095765	0.737143876578943	-0.006577616688795
Chr12_part_1	A4	-0.165664859087027	0.694656545127655	-0.175279879242
Chr12_part_1	A7	-0.248177362233977	0.733813257859857	-0.2443444837135
Chr12_part_1	A8	-0.252869100641483	0.78153407490287	-0.251814659622
Chr12_part_1	A9	-0.254237064663242	0.805950867081726	-0.236510220196
Chr12_part_1	B1	-0.0908049632469429	0.712654676170415	-0.09197006959775
Chr12_part_1	B10	0.0128266444076842	0.710248763276921	0
Chr12_part_1	B11	-0.195956708821735	0.715838764627794	-0.18460997986
Chr12_part_1	B12	-0.0918121188070598	0.709696973043305	-0.0948986408663
Chr12_part_1	B3	-0.205639610522191	0.761762255284877	-0.2069032730535
Chr12_part_1	B4	-0.0426655652303584	0.741382211744677	-0.03588197561615
Chr12_part_1	B5	0.00458767515438359	0.728463544003567	0
Chr12_part_1	B6	0.0294697849208882	0.728684596445318	0.002860677332255
Chr12_part_1	B8	-0.225889257247667	0.729014399816715	-0.2130768849495
Chr12_part_1	B9	-0.28190484677362	0.742008304297413	-0.2707240060995
Chr12_part_1	C1	-0.137366393070628	0.71544829826538	-0.14142864635
Chr12_part_1	C10	-0.312016448329454	0.860649529016837	-0.296267664066
Chr12_part_1	C11	-0.154109619251986	0.728706495700887	-0.1575024375675
Chr12_part_1	C12	-0.187748245618749	0.710264009111515	-0.180682458417
Chr12_part_1	C2	-0.105617782023591	0.701889532869844	-0.1073428970515
Chr12_part_1	C3	-0.160901725600936	0.708482544874328	-0.1847329758775
Chr12_part_1	C4	-0.162004025091298	0.843445304682713	-0.1305210200145
Chr12_part_1	C5	-0.102179456235434	0.734799028861432	-0.08474899189385
Chr12_part_1	C6	-0.266599798472483	0.784912451211059	-0.2428652351255
Chr12_part_1	C7	0.155276863294858	0.679180645752856	0.1179459828515
Chr12_part_1	C9	-0.0762178995607805	0.702520411804613	-0.08628792073465
Chr12_part_1	D1	-0.0357632798363987	0.697028669895551	-0.02932346542495
Chr12_part_1	D10	-0.108165064093075	0.715649577156952	-0.1109032133425
Chr12_part_1	D11	-0.191026955522498	0.794702050694193	-0.1879307051915
Chr12_part_1	D12	-0.114514832488234	0.718794601443503	-0.113358003923
Chr12_part_1	D2	-0.207899203663224	0.760339294592677	-0.206567363584
Chr12_part_1	D3	-0.197222980542747	0.730642745797157	-0.198950073415
Chr12_part_1	D4	-0.115340126410142	0.864217204232943	-0.0752674571775
Chr12_part_1	D5	-0.0348943587981493	0.774405368215644	-0.02909010379045
Chr12_part_1	D6	-0.165786947006332	0.735915718136529	-0.1744559549535
Chr12_part_1	D7	-0.141437357136444	0.71848397011321	-0.143801441898
Chr12_part_1	D8	0.0215748109229349	0.704676411749769	0
Chr12_part_1	D9	-0.0751301570773737	0.743222356925364	-0.06845648035685
Chr12_part_1	A5	0.0661133930423232	0.703877959951551	0.0473485222025
Chr12_part_1	B2	-0.0134004996829071	0.700220768036824	-0.0190880272995
Chr12_part_1	B7	-0.289180455785386	0.728959697507322	-0.2909683851715
Chr12_part_2	A1	-0.362167713859947	0.768025203925305	-0.362589710829
Chr12_part_2	A11	-0.0381958858817536	0.725045482535891	-0.0511285038442
Chr12_part_2	A12	-0.0179110739397737	0.730865931236617	-0.0225984962072
Chr12_part_2	A2	-0.0229198597437618	0.741248644109028	-0.0353923778158
Chr12_part_2	A4	-0.14206035800027	0.71650011582097	-0.159727905905
Chr12_part_2	A7	-0.322317031942813	0.748145299293651	-0.334845032442
Chr12_part_2	A8	-0.232474061078534	0.786097530458135	-0.230761153917
Chr12_part_2	A9	-0.23488481270975	0.827205965149368	-0.228729479636
Chr12_part_2	B1	-0.105627768725184	0.721382719891644	-0.126086458755
Chr12_part_2	B10	-0.00974026691551693	0.728443473680152	-0.0106329539519
Chr12_part_2	B11	-0.210875216844394	0.720034045970647	-0.224417042926
Chr12_part_2	B12	-0.0914801111072717	0.713817973098886	-0.09462109652
Chr12_part_2	B3	-0.192913461285218	0.765109954600165	-0.206455245823
Chr12_part_2	B4	-0.0364383609244846	0.727996234479788	-0.0453202671694
Chr12_part_2	B5	-0.00927803585128546	0.71812758796551	-0.0204063192925
Chr12_part_2	B6	0.0413346812558297	0.742533917794291	0.0165321577491
Chr12_part_2	B8	-0.229465223889669	0.748209085158095	-0.239603983336
Chr12_part_2	B9	-0.295255426003405	0.755229444442785	-0.301815460349
Chr12_part_2	C1	-0.122188022999277	0.730130272342474	-0.134998130187
Chr12_part_2	C10	-0.254864088804909	0.859635812283128	-0.240626528357
Chr12_part_2	C11	-0.13106897556106	0.727001314522575	-0.124301788529
Chr12_part_2	C12	-0.219919719107811	0.733807546072702	-0.225082497336
Chr12_part_2	C2	-0.0928074436742353	0.710616600194062	-0.0976828486036
Chr12_part_2	C3	-0.190474962025266	0.723831268281377	-0.194289835429
Chr12_part_2	C4	-0.272158861170171	0.846725842812158	-0.253171342993
Chr12_part_2	C5	-0.115827177080067	0.73662023573457	-0.121962214798
Chr12_part_2	C6	-0.277818494382089	0.792029830785613	-0.263099827903
Chr12_part_2	C7	0.17639446261325	0.682425052819725	0.133397871921
Chr12_part_2	C9	-0.0861276658093454	0.711094865155341	-0.106595935563
Chr12_part_2	D1	-0.0489523890135118	0.701803302608544	-0.0573675310694
Chr12_part_2	D10	-0.126073317527679	0.726761817950617	-0.131120251329
Chr12_part_2	D11	-0.211848771883867	0.795719470856122	-0.204005708078
Chr12_part_2	D12	-0.13055948851091	0.734342577150746	-0.146808705216
Chr12_part_2	D2	-0.205548809902429	0.766735355151943	-0.210921304836
Chr12_part_2	D3	-0.19758225154059	0.741828064533901	-0.20692589415
Chr12_part_2	D4	-0.112851852167147	0.884141631592774	-0.0895915928735
Chr12_part_2	D5	-0.0222194028813037	0.743329607356682	-0.0136501181457
Chr12_part_2	D6	-0.171639910955559	0.768271794980917	-0.18843019451
Chr12_part_2	D7	-0.215767297954387	0.708724732733851	-0.226602406567
Chr12_part_2	D8	-0.000405130814356158	0.711154455993411	-0.00355486071225
Chr12_part_2	D9	-0.0873430600066971	0.744543701166287	-0.101659744875
Chr12_part_2	A5	0.0745998786028795	0.714557907562426	0.0431634327472
Chr12_part_2	B2	-0.0626456022231322	0.717308909449082	-0.0610095204877
Chr12_part_2	B7	-0.285248104267268	0.758877038351308	-0.296496516327
Chr13	A1	-0.0292556946963607	0.693963104089843	-0.04922357573495
Chr13	A11	0.0683494679938504	0.684406040584791	0.02744925647635
Chr13	A12	0.114938435527519	0.673142743993155	0.07000326585395
Chr13	A2	0.13440388172843	0.696403568112598	0.09577742541855
Chr13	A4	0.0186459317948176	0.67783981243671	0
Chr13	A7	0.0362371538871526	0.671264082453943	0
Chr13	A8	-0.0109198358844267	0.713126132318878	-0.0254813829773
Chr13	A9	0.127287900751732	0.745369151271679	0.1082754554695
Chr13	B1	-0.0277013267667954	0.684226033795361	-0.04948754786785
Chr13	B10	0.102732547135506	0.683616057010383	0.06026897585245
Chr13	B11	-0.0329882101054628	0.675434893301374	-0.0591021461506
Chr13	B12	0.0169335962247232	0.667736267943377	-0.007480374027155
Chr13	B3	-0.00487837768185861	0.724174399622329	-0.0214120098702
Chr13	B4	0.151661919518058	0.678574590564649	0.113623117618
Chr13	B5	0.0533235608720062	0.681788625248274	0.0115790067772
Chr13	B6	0.138390866393757	0.657461897111028	0.0943170261037
Chr13	B8	-0.0208964229517782	0.673326767025289	-0.0417561833434
Chr13	B9	-0.00455139839868913	0.68521742993895	-0.0254998170691
Chr13	C1	0.128823137155147	0.677853554701827	0.09459365931315
Chr13	C10	0.0361475302336296	0.785650140470522	0.0226055616477
Chr13	C11	0.0288181781318288	0.690793130895281	0
Chr13	C12	-0.00339968550454131	0.668470008024482	-0.027402491234
Chr13	C2	0.137468207281361	0.676739656998926	0.100698715822
Chr13	C3	-0.0169613743145976	0.678032348738418	-0.03588185733895
Chr13	C4	-0.00587220736418533	0.802617761717481	0
Chr13	C5	0.119035143488768	0.702011605245225	0.0997673199334
Chr13	C6	0.112388117706767	0.721109470012129	0.07987787336605
Chr13	C7	0.12160606768575	0.678690705102298	0.08109712363895
Chr13	C9	0.0191169569901728	0.67752209784202	-0.0105219226121
Chr13	D1	0.075160308000514	0.676332977773628	0.02953449726515
Chr13	D10	0.0542994370842515	0.675468077749849	0.01307187903775
Chr13	D11	0.0799624817795866	0.734596966864786	0.0553438730203
Chr13	D12	0.132042969648197	0.665055344751136	0.0888774089848
Chr13	D2	-0.00947138418857834	0.709038637620356	-0.02000248487825
Chr13	D3	-0.00265104079849802	0.708459594789331	-0.02025297419
Chr13	D4	-0.0157277553351117	0.859777498405771	0
Chr13	D5	0.046595381865526	0.75879737479512	0.02182020613335
Chr13	D6	-0.0155707743497192	0.709567345129355	-0.03588853985095
Chr13	D7	-0.0280917363743848	0.684866139384909	-0.0400440027424
Chr13	D8	0.150311902810356	0.687690650161861	0.1060666482385
Chr13	D9	0.112762164618735	0.683896351605889	0.07827721890335
Chr13	A5	0.168011636897059	0.656550715822662	0.1216205334775
Chr13	B2	0.0715508817295062	0.705316638951967	0.0416054115767
Chr13	B7	0.0736809607642177	0.692209312489901	0.03962297063375
Chr14	A1	-0.00733844780680516	0.706192244303051	-0.0273885663642
Chr14	A11	0.0442177517380976	0.692561503986486	0.0055650763972
Chr14	A12	0.133402213301277	0.699735868267195	0.105056384358
Chr14	A2	0.12092748185689	0.713014758723325	0.0899070577728
Chr14	A4	-0.011991819086902	0.68842894435184	-0.0367436909673
Chr14	A7	0.047468063371919	0.691090195933803	0.0129992270601
Chr14	A8	0.0230247359046319	0.712732414581876	-0.00345102918726
Chr14	A9	0.133571333597306	0.765892742081563	0.125555259027
Chr14	B1	-0.038360084053503	0.699557787595534	-0.0679043887696
Chr14	B10	0.0264435193570559	0.697998906278025	0
Chr14	B11	-0.0288222215279358	0.689619733974113	-0.0611961519566
Chr14	B12	0.0128947606535715	0.696573088104934	-0.0151309603216
Chr14	B3	-0.0101487102969374	0.727783127916717	-0.0275056007432
Chr14	B4	0.170320910695823	0.700716866191283	0.129600495184
Chr14	B5	0.0526586031610772	0.698904646853424	0.0169004033966
Chr14	B6	0.0945961470659436	0.679049355076121	0.0633321600022
Chr14	B8	-0.0142150520791961	0.690944628913528	-0.0381017077592
Chr14	B9	0.00287279975612333	0.701568273525566	-0.0266205620502
Chr14	C1	0.143956979952668	0.682323314744229	0.110733892037
Chr14	C10	0.042605808295153	0.798543161897119	0.0329591967507
Chr14	C11	-0.00109158057688192	0.698589013300074	-0.0286911416675
Chr14	C12	-0.0170363000775463	0.687584279353381	-0.044848842957
Chr14	C2	0.131202887374414	0.698877113679885	0.0930443191582
Chr14	C3	-0.0434627223322398	0.6911033222865	-0.0775013889307
Chr14	C4	0.0271093382657469	0.83223407306922	0.0193856466453
Chr14	C5	0.127738441026201	0.70950511430107	0.100388862056
Chr14	C6	0.145078543842085	0.739487946722476	0.133774971716
Chr14	C7	0.064509414391574	0.70115439081372	0.0378314864308
Chr14	C9	-0.0167684172327618	0.694777377200617	-0.0450172077125
Chr14	D1	0.0551178377952698	0.691407198610548	0.0201860503652
Chr14	D10	0.0472041774693464	0.702914530177471	0.019268971832
Chr14	D11	0.110630722105893	0.749890923266615	0.0896299084008
Chr14	D12	0.144326214363128	0.683126654302844	0.112237862047
Chr14	D2	-0.0182207245087679	0.726649024129024	-0.0399489101644
Chr14	D3	0.00468399218013036	0.713894378557962	-0.0129410497667
Chr14	D4	-0.0397953486911408	0.859887415084126	-0.027591609207
Chr14	D5	-0.00937966151612608	0.760009704912606	-0.036945771699
Chr14	D6	-0.00876701633729314	0.728574454422955	-0.0346638946798
Chr14	D7	-0.0427154727112144	0.702584784503206	-0.0698167238355
Chr14	D8	0.16728773484968	0.687154933986116	0.14415111201
Chr14	D9	0.121918780977335	0.720952751479234	0.0981808344714
Chr14	A5	0.176393392739328	0.674862958358346	0.14401542649
Chr14	B2	0.0557625566990693	0.706814159631861	0.029973744901
Chr14	B7	0.0860125972842927	0.709481846620013	0.0503661400394
Chr15	A1	-0.0321099189383906	0.713075601973862	-0.0596625297686
Chr15	A11	0.0947719488267745	0.711713678555962	0.0634241114704
Chr15	A12	0.124728724191492	0.697367712720246	0.0884836913064
Chr15	A2	0.145046377317909	0.733413464812193	0.114773189034
Chr15	A4	0.0219472286840769	0.707580740972224	-0.0095349590103
Chr15	A7	0.019505337663883	0.711706454487871	-0.0167457310935
Chr15	A8	-0.062726534810239	0.747193306817757	-0.0857201783857
Chr15	A9	0.124884444392087	0.784140357515055	0.107009226955
Chr15	B1	0.00204734485118461	0.717978221003633	-0.0271636103055
Chr15	B10	0.134811305268416	0.709965783655855	0.103868902028
Chr15	B11	-0.0394498581775669	0.699746072628604	-0.0724078774658
Chr15	B12	0.0277937435282559	0.696129086285563	-0.00381528903571
Chr15	B3	0.0273223000088231	0.751190221760219	-0.00155659885845
Chr15	B4	0.179104135694371	0.708816772117176	0.144102017304
Chr15	B5	0.0768722657764206	0.708238026667306	0.0403103215708
Chr15	B6	0.171816122392898	0.6885830219721	0.136782625142
Chr15	B8	-0.025737252290861	0.702000223534479	-0.0583060706403
Chr15	B9	-0.00154266966448677	0.729904890467487	-0.0292981381574
Chr15	C1	0.143762195008174	0.692101321693085	0.105691766338
Chr15	C10	0.0253026518119011	0.832598939542746	0.0162629901263
Chr15	C11	0.0390684643038973	0.706634055498633	0.00513054413526
Chr15	C12	-0.0110209723555557	0.700404138195779	-0.0421119725833
Chr15	C2	0.138922520462852	0.698044017103574	0.108070076241
Chr15	C3	0.00298182707492685	0.703280979604124	-0.0349834474799
Chr15	C4	0.0288027771255563	0.811436842137455	0.0179262346474
Chr15	C5	0.122938050028167	0.716205187801829	0.094257988721
Chr15	C6	0.0887513444681705	0.74914324522901	0.0671804965232
Chr15	C7	0.180499628513574	0.691630454235155	0.143415869543
Chr15	C9	0.0338098350189142	0.697062951409225	-0.00503879972535
Chr15	D1	0.0912722645990553	0.693981483710982	0.0551773679063
Chr15	D10	0.0717585579051695	0.707050991281938	0.0386234323681
Chr15	D11	0.0676394059877038	0.777357419983756	0.0489096016971
Chr15	D12	0.116386432639997	0.688062903191975	0.0789532703353
Chr15	D2	-0.00391212409266454	0.747323411583517	-0.034493083506
Chr15	D3	0.00435612872190064	0.726491305111358	-0.0290900303183
Chr15	D4	0.0144025614123276	0.869470781143503	0.0171377432765
Chr15	D5	0.072512872706961	0.766251933009834	0.0417418295542
Chr15	D6	-0.00415881013437806	0.743250470294841	-0.02541735796
Chr15	D7	-0.00777111078246426	0.688092958296607	-0.0429853426293
Chr15	D8	0.17702310580992	0.694977603654474	0.142459984241
Chr15	D9	0.109188891858708	0.716362976825648	0.0756134645119
Chr15	A5	0.188570117969137	0.685490493693943	0.144270264512
Chr15	B2	0.108075425437262	0.715666286615052	0.0774799657875
Chr15	B7	0.0490921430620666	0.726082955552227	0.0232801756806
Chr16	A1	-0.0054663173379469	0.713929674982598	-0.0204488025297
Chr16	A11	0.0594296668152011	0.712652197714713	0.00680731448923
Chr16	A12	0.13088612050663	0.69193738619943	0.0795646912208
Chr16	A2	0.159197638857465	0.72729605244105	0.122491921506
Chr16	A4	0.012869072897155	0.694792009853259	-0.0160858544488
Chr16	A7	0.0295719021221047	0.701188430011108	0
Chr16	A8	0.0328836434166396	0.717676995341448	0
Chr16	A9	0.116124648439529	0.77670262393762	0.0823351589015
Chr16	B1	-0.00340299937719661	0.707082594083774	-0.0259455824431
Chr16	B10	0.064603527610694	0.702103662987172	0.0271889531822
Chr16	B11	-0.0174645208070599	0.69946602409055	-0.0488548941772
Chr16	B12	0.0280851954117786	0.697601424754885	0
Chr16	B3	0.587268553953745	0.713763039383061	0.544568696385
Chr16	B4	0.166446653981369	0.710160190765084	0.121683674843
Chr16	B5	0.07720376321406	0.714606906086075	0.0296740242951
Chr16	B6	0.108073892841199	0.687464800037339	0.0684927846078
Chr16	B8	-0.0223614274175759	0.695878290365115	-0.0450496523368
Chr16	B9	0.583204177127571	0.691358871792507	0.541225052551
Chr16	C1	0.145489424587792	0.700488875236492	0.103681422648
Chr16	C10	0.0458609526379018	0.813412451572189	0.0313166564988
Chr16	C11	0.00968599653792685	0.696197289693695	-0.0142251584577
Chr16	C12	0.0103653503035444	0.69264939858914	-0.0152457345699
Chr16	C2	0.14793205470856	0.693370201939091	0.104335896824
Chr16	C3	-0.0222326199465257	0.696311633765042	-0.04734892093
Chr16	C4	0.00430367150782358	0.803634041833909	0
Chr16	C5	0.130807422260616	0.706030840673981	0.0896003553185
Chr16	C6	0.111521548130799	0.725597484349541	0.0637884697725
Chr16	C7	0.13539513432113	0.697642649355547	0.0960531124583
Chr16	C9	0.00243942432048045	0.700896662796614	-0.0221874554936
Chr16	D1	0.0845160943365353	0.688661424540366	0.0426377623116
Chr16	D10	0.0614719936995583	0.699311212819452	0.012288426223
Chr16	D11	0.103790322757592	0.7470772382988	0.073285170144
Chr16	D12	0.134137489774961	0.688147837219674	0.0960106772437
Chr16	D2	-0.013946757273612	0.735636909108993	-0.0340420122609
Chr16	D3	0.00750725882635561	0.723610247344026	-0.00966634081154
Chr16	D4	0.00277483465174722	0.858590011631935	0
Chr16	D5	-0.0274360042190559	0.757651587640751	-0.0502873089381
Chr16	D6	-0.010038302790677	0.733087056186897	-0.026354412264
Chr16	D7	-0.0387550481705779	0.705313097765744	-0.0703986010295
Chr16	D8	0.167830701021248	0.690427537060296	0.124807395253
Chr16	D9	0.117737745677679	0.708346011903545	0.079760895405
Chr16	A5	0.185090335175703	0.683205456628975	0.137408571434
Chr16	B2	0.0645070867100537	0.723001669757068	0.0275530401865
Chr16	B7	0.0748384617309718	0.715519503956979	0.0286992308023
Chr2	A1	0.979920933282286	0.680402552198946	0.95730773981
Chr2	A11	1.05436457088451	0.670510838098883	1.0182724573
Chr2	A12	0.116919135819128	0.68059167773412	0.0727649714107
Chr2	A2	0.111829780576247	0.710542898701459	0.069841399894
Chr2	A4	0.994966271186808	0.678684151881437	0.960215782354
Chr2	A7	1.03022832340977	0.677530742838974	0.998919289433
Chr2	A8	1.01867800548344	0.682101524199817	0.982403033354
Chr2	A9	0.156960079841761	0.75645882306145	0.118792063405
Chr2	B1	0.97090151757134	0.67787930659785	0.937848888718
Chr2	B10	1.03336608195824	0.674799031287141	0.996971841682
Chr2	B11	0.974027976878806	0.666901250415675	0.940354951007
Chr2	B12	0.997862936519258	0.677800912782268	0.972175018579
Chr2	B3	0.570465907909703	0.70683741456905	0.523517433407
Chr2	B4	0.148689903936295	0.696414982474904	0.0950373785503
Chr2	B5	1.0475871949873	0.686927698213253	1.02226238908
Chr2	B6	1.05491528869663	0.664270105016358	1.02883986389
Chr2	B8	0.987519703124245	0.667716054184273	0.948944603515
Chr2	B9	0.908458839692465	0.685385354947827	0.870368531363
Chr2	C1	0.14410069597344	0.679559743110672	0.0972543630539
Chr2	C10	1.05292698330454	0.712093631357393	1.02412070527
Chr2	C11	1.01686121340884	0.685360491043655	0.97163734002
Chr2	C12	0.98464911280015	0.657719303250843	0.952282610062
Chr2	C2	0.14002110725374	0.681337401837891	0.0849422626613
Chr2	C3	0.981062636434925	0.671945383400742	0.938924948854
Chr2	C4	1.01320887061367	0.731101703997922	0.997671117176
Chr2	C5	0.132011719085132	0.704662192602653	0.0856439165422
Chr2	C6	0.144551737022931	0.735409119890071	0.115160039134
Chr2	C7	0.0885234198125016	0.683082550781329	0.0267472240403
Chr2	C9	0.970764588319249	0.665420557969748	0.92871302474
Chr2	D1	1.04735977859088	0.670133996170035	1.01114685603
Chr2	D10	0.0673566802390171	0.685799351996468	0.0114583301401
Chr2	D11	0.0903756281548826	0.756083313169207	0.0533809915201
Chr2	D12	0.136690887264169	0.68635861186953	0.0951837281095
Chr2	D2	0.983634565836094	0.707182141028862	0.947632755579
Chr2	D3	0.990455288660317	0.690240328346208	0.966011176043
Chr2	D4	0.994559145070332	0.766753891877397	0.969807447869
Chr2	D5	0.965593859285809	0.754278592991456	0.945282919138
Chr2	D6	0.874755327333774	0.694539136750263	0.831908029315
Chr2	D7	0.936096782520494	0.655321119577143	0.896397806133
Chr2	D8	0.14548785745909	0.688387626016462	0.0898577555466
Chr2	D9	0.118798997604141	0.696293396525067	0.0706422996578
Chr2	A5	0.174736021320393	0.667985327901116	0.11046064926
Chr2	B2	0.803082630930683	0.685260632973244	0.760153675442
Chr2	B7	1.08853639953722	0.666956747474067	1.05281305808
Chr3	A1	1.03312580266673	0.790998180829321	0.990060488107
Chr3	A11	0.135460597291375	0.747440570501437	0.0509991190915
Chr3	A12	1.19062408424971	0.79752913002806	1.177354194785
Chr3	A2	0.175605504394277	0.788535894017335	0.0928875012873
Chr3	A4	0.145933205031642	0.75823500874352	0.0703673769005
Chr3	A7	1.24966467029011	0.846847375665009	1.23434967807
Chr3	A8	0.255692501585296	0.745188945361002	0.1551491593135
Chr3	A9	0.822214907448672	0.840817022149403	0.7773776448325
Chr3	B1	0.532599631822864	0.795060465189281	0.468367807365
Chr3	B10	0.183347137762853	0.755545116092118	0.1007118889595
Chr3	B11	1.04644432732474	0.788012542238905	1.01283410714
Chr3	B12	0.0577696464547759	0.760462881127784	0
Chr3	B3	0.0990626215362271	0.811581538686655	0
Chr3	B4	0.288026178529225	0.769255677450802	0.21257649667
Chr3	B5	0.140147030065976	0.778775252453439	0.0449966235561
Chr3	B6	0.0395657212565832	0.718882208201317	0
Chr3	B8	1.08368255259634	0.818389117230219	1.05248470969
Chr3	B9	1.08101364446235	0.839808234311669	1.06563489587
Chr3	C1	1.18288673301524	0.839712954375029	1.17311086936
Chr3	C10	0.178123660805443	0.868377448843216	0.1039821597625
Chr3	C11	0.596334890311898	0.773660976391047	0.542330672271
Chr3	C12	0.965602102292376	0.837587230681871	0.9484641315165
Chr3	C2	1.13709126870206	0.811163840042119	1.109296187745
Chr3	C3	0.777209548702011	0.76526153466727	0.7396403370605
Chr3	C4	0.616927921559303	0.787899865082943	0.5614219245585
Chr3	C5	1.17713573284301	0.814903655786545	1.16059946388
Chr3	C6	1.26394397490816	0.812641505631779	1.249449179235
Chr3	C7	0.856520966594224	0.773239757375977	0.8058744763775
Chr3	C9	0.0351665505086476	0.757170741318799	0
Chr3	D1	0.134730526060648	0.755708371765196	0.03432108798935
Chr3	D10	1.07976505423483	0.818773946180382	1.0553019251
Chr3	D11	1.28766659458437	0.872691746188067	1.270933801725
Chr3	D12	1.2474714672646	0.788690126937477	1.218293339875
Chr3	D2	0.109143504512311	0.797197591151177	0.0232637800488
Chr3	D3	0.125839133977369	0.784232683162181	0.02943257709785
Chr3	D4	-0.0370348179075517	0.948696981497689	0
Chr3	D5	0.103880471207297	0.787356738884559	0.01847515683135
Chr3	D6	0.299056393870043	0.78113107571047	0.2107432976635
Chr3	D7	0.955502911924565	0.788185027564667	0.9435547046835
Chr3	D8	0.209172234124974	0.765370530139451	0.124003069237
Chr3	D9	1.17396426880326	0.816871575157634	1.14444552178
Chr3	A5	0.241295206952198	0.753662132000773	0.145547746361
Chr3	B2	0.0757537666870798	0.769715934029754	0
Chr3	B7	0.300989985254877	0.756555656041422	0.2109132424135
Chr4	A1	-0.186572957557272	0.719060399417491	-0.207016747593
Chr4	A11	0.0155932838954949	0.714445250335578	-0.00648825880911
Chr4	A12	0.0179511638872225	0.710599023767635	-0.005995350832445
Chr4	A2	0.084950039465695	0.719220778123033	0.05110816465995
Chr4	A4	-0.0681671748327483	0.702324011713705	-0.0884742892637
Chr4	A7	-0.136805478275105	0.702411816852542	-0.155059353281
Chr4	A8	-0.287888024409749	0.76619648870867	-0.2994212252475
Chr4	A9	-0.0134597759186184	0.783496305738458	-0.005389296360525
Chr4	B1	-0.0525933461907234	0.711527916594107	-0.0719612495415
Chr4	B10	0.11316998961206	0.688041215329633	0.0732627696671
Chr4	B11	-0.140293478843563	0.694461199194927	-0.16330287248
Chr4	B12	-0.0213395222231331	0.693636700596376	-0.0457021087655
Chr4	B3	-0.0387136151267517	0.743955178581447	-0.0498863127674
Chr4	B4	0.077380481032774	0.701436592272942	0.0406023760314
Chr4	B5	0.0245421111462782	0.697510412276445	0
Chr4	B6	0.171018974802483	0.672957521058859	0.128840697104
Chr4	B8	-0.192396521987391	0.720315721345901	-0.21160806577
Chr4	B9	-0.123391601158392	0.721987647465584	-0.136710206807
Chr4	C1	0.03711284399427	0.694405376732322	0
Chr4	C10	-0.0587605926661333	0.822527047808988	-0.0478601180889
Chr4	C11	0.0123252832365863	0.706414335738885	-0.00334180886737
Chr4	C12	-0.0895771020830241	0.703103773135436	-0.1067357619935
Chr4	C2	0.0569235413956829	0.696673681862303	0.0139454365648
Chr4	C3	-0.0871851817584884	0.716183169685316	-0.102709261166
Chr4	C4	-0.0832775538202265	0.832787072123444	-0.06538012291615
Chr4	C5	0.0187000634713019	0.713116165352696	0
Chr4	C6	-0.0348969047945524	0.746480811414372	-0.042658047306
Chr4	C7	0.22425651607808	0.685322826364741	0.177673715446
Chr4	C9	0.00679111244080596	0.689867198240573	-0.012723185986
Chr4	D1	0.0462589149703701	0.694682213714086	0
Chr4	D10	-0.0236031505915719	0.705935393801564	-0.0446487860319
Chr4	D11	-0.0484438237634124	0.768232012921368	-0.05084430847095
Chr4	D12	-0.0117474666677592	0.695227142813994	-0.03962842761015
Chr4	D2	-0.0954152521670716	0.742322072732294	-0.1087373975985
Chr4	D3	-0.083880320594125	0.72315427886379	-0.09663109339
Chr4	D4	-0.00402910250800224	0.863357938765958	0.006865695542025
Chr4	D5	0.0124974475594451	0.773026545811515	-4.6657417472e-05
Chr4	D6	-0.0811726121236104	0.743790713269105	-0.0953929498978
Chr4	D7	-0.0817258488838062	0.696404995296356	-0.1031048010445
Chr4	D8	0.0980410015284662	0.695098393778492	0.0570385413755
Chr4	D9	0.0249242880746619	0.716065624526311	0
Chr4	A5	0.125968242785167	0.672463295863268	0.0868152900138
Chr4	B2	0.0704655584866562	0.717831638501018	0.0298991485995
Chr4	B7	-0.0806617243077098	0.725215696667576	-0.0927717062568
Chr5	A1	0.987740811406923	0.697162410342353	0.974572243466
Chr5	A11	0.0479043179126592	0.703908307868124	0
Chr5	A12	0.136562257953404	0.699871289441678	0.0994331051137
Chr5	A2	0.148027260890914	0.715703697808894	0.1046461809805
Chr5	A4	0.968481488022051	0.697108082570131	0.9606907765095
Chr5	A7	0.11953371355349	0.690773636964657	0.07319289063905
Chr5	A8	1.07170292460093	0.730265143196508	1.05655212696
Chr5	A9	0.136629934736091	0.762223059430531	0.101453973317
Chr5	B1	0.904434380745865	0.711557388537142	0.89446362939
Chr5	B10	0.0866540691372339	0.713423960648231	0.0497892809549
Chr5	B11	0.959575972415745	0.699552767169147	0.9580791849375
Chr5	B12	0.95168389825572	0.68890646445141	0.9428608711665
Chr5	B3	0.483323803913497	0.716336741239349	0.4638071863415
Chr5	B4	0.174804027756041	0.724332373859255	0.144376705178
Chr5	B5	0.0721091719074398	0.698683044584852	0.0273624993819
Chr5	B6	0.105875685747929	0.694702783366882	0.06366154955535
Chr5	B8	0.976866126214813	0.700293335255229	0.964058260069
Chr5	B9	0.0221573214716111	0.722086403998747	0
Chr5	C1	0.168900300578755	0.698983406922351	0.130422304659
Chr5	C10	0.0596973321511622	0.806109450872744	0.03054268299625
Chr5	C11	0.567259442532122	0.706627860193071	0.5405768507715
Chr5	C12	0.954796066266869	0.690069240579624	0.940733720139
Chr5	C2	0.130091848253843	0.688706456569169	0.08797218769865
Chr5	C3	0.981955061246245	0.705497047202519	0.972944681937
Chr5	C4	0.107396700061402	0.815695944730112	0.09023461016855
Chr5	C5	0.121319457399289	0.722531141613058	0.0892930850608
Chr5	C6	0.174774675677302	0.734225856874507	0.1375706807225
Chr5	C7	-0.0253933889330252	0.719881439693545	-0.00253943083963
Chr5	C9	0.980691094094292	0.696372368067015	0.9780325921255
Chr5	D1	0.0565500182819926	0.699638116727926	0.0126300349392
Chr5	D10	1.00340507536425	0.705001882174131	1.002960395835
Chr5	D11	0.138369247194392	0.756824408796735	0.107178833872
Chr5	D12	0.159409546726659	0.702974611928923	0.1304058197285
Chr5	D2	0.974411196151092	0.724570218602655	0.9714963622325
Chr5	D3	0.976532846199055	0.71940900048312	0.9710858718605
Chr5	D4	-0.0472272374803104	0.861531476933711	0
Chr5	D5	0.0780870980962257	0.753937817433403	0.04749763227185
Chr5	D6	0.970630785869961	0.730867133844995	0.9580198265915
Chr5	D7	0.991766079821276	0.694995718497392	0.974266716914
Chr5	D8	0.176743051689024	0.704841369757224	0.1479005004945
Chr5	D9	0.129138691031764	0.709406356362185	0.09134880481595
Chr5	A5	0.160505821849159	0.694779061886078	0.1273436369595
Chr5	B2	0.113624656685604	0.71886458931753	0.0865929268239
Chr5	B7	0.146391043657764	0.716552262241036	0.1024604847255
Chr6	A1	0.19640064163839	0.706046985319549	0.14529102645
Chr6	A11	0.151594764579313	0.714266543470262	0.1048479249585
Chr6	A12	0.286005940552263	0.677510827289649	0.2283366279095
Chr6	A2	0.197730705884155	0.736800236118337	0.139930456496
Chr6	A4	0.131407761787971	0.688858141850131	0.07288415255335
Chr6	A7	0.335672658886146	0.684343530407488	0.2635147404455
Chr6	A8	0.235292768167972	0.70467482777419	0.178922060712
Chr6	A9	0.278442852101824	0.75958642582845	0.2367492047285
Chr6	B1	0.000958549621379714	0.71889122299107	-0.04719919991205
Chr6	B10	0.0697382893059933	0.71999348822209	0.0204938914275
Chr6	B11	0.152841019437199	0.686325082131069	0.0900487163359
Chr6	B12	0.0511435083195697	0.68668812203081	0.0008526176773316
Chr6	B3	0.0513061665939311	0.749702079229701	0.01812922472515
Chr6	B4	0.304259750305677	0.701201217327534	0.242329732752
Chr6	B5	0.167496153004291	0.703624093664767	0.115716955809
Chr6	B6	0.0451449261394346	0.712382035561608	0.010216942119155
Chr6	B8	0.194637845754754	0.675495678393689	0.128823043647
Chr6	B9	0.146193145878737	0.717430167241133	0.09575958772705
Chr6	C1	0.312806206886825	0.686685887018787	0.251912065335
Chr6	C10	0.165918014127403	0.814975059335158	0.1318971472875
Chr6	C11	0.1211176731987	0.745018609540488	0.05430774682785
Chr6	C12	0.0825943102392248	0.685764389983323	0.01598161322355
Chr6	C2	0.237691498990383	0.704310000490966	0.179585337111
Chr6	C3	0.127362116192123	0.699233040514531	0.05826302272955
Chr6	C4	0.0683453077560367	0.825309122569244	0.04364007538015
Chr6	C5	0.248526942916678	0.722927010901172	0.1890682868105
Chr6	C6	0.360697516732421	0.724695395057105	0.3194736960075
Chr6	C7	-0.0804751836040125	0.729287405124506	-0.1410693586515
Chr6	C9	0.0377676695844715	0.708183824075501	-0.01602213690835
Chr6	D1	0.131162001914077	0.706149449368591	0.0813771680197
Chr6	D10	0.152380868863547	0.69049133522722	0.08789277839975
Chr6	D11	0.339197276577514	0.735436160275484	0.2815694447745
Chr6	D12	0.332302025506022	0.684699812600405	0.267367032179
Chr6	D2	0.0966782156435152	0.735418209424881	0.0442530156464
Chr6	D3	0.107957539010622	0.729733510010681	0.06023565114515
Chr6	D4	-0.0312333380113507	0.886659040739437	-0.0328641978614
Chr6	D5	0.0662026738482451	0.831344227690282	0.0151606675955
Chr6	D6	0.109977157864273	0.723949746722204	0.0686827729468
Chr6	D7	0.0981319965307718	0.68482401904555	0.0330881327283
Chr6	D8	0.19595070579024	0.710882291400303	0.128543123787
Chr6	D9	0.242895776867558	0.726345129462427	0.205638306935
Chr6	A5	0.254488922715871	0.676230079046699	0.1929543092325
Chr6	B2	0.144193852234988	0.719956981908309	0.1019410381705
Chr6	B7	0.307086815554473	0.712243401291907	0.2442591703255
Chr7	A1	-0.0817725556223576	0.692847707937897	-0.1012752596155
Chr7	A11	0.0385475675039528	0.685800199813626	0
Chr7	A12	0.0779911585088138	0.679553386961857	0.0283195992961
Chr7	A2	0.138448994153759	0.707691685126955	0.09089220496405
Chr7	A4	-0.0337004306460777	0.680752068159654	-0.0467532715072
Chr7	A7	-0.0261124180654378	0.670643356310362	-0.0554811591382
Chr7	A8	-0.0471186752149157	0.71627643262601	-0.0583529666201
Chr7	A9	0.0701541722868674	0.76783373160248	0.0500232632323
Chr7	B1	-0.0398485315934549	0.692870559644118	-0.0618635202063
Chr7	B10	0.0907139816491891	0.690506434159269	0.05238253126375
Chr7	B11	-0.0670957183271296	0.67811255584829	-0.09350699165185
Chr7	B12	0.00621606430464906	0.677718377631908	-0.0161878441275
Chr7	B3	-0.0486070486485236	0.741354398099184	-0.05898332665685
Chr7	B4	0.118535102907185	0.694071614862665	0.081584133449
Chr7	B5	0.0431660797231633	0.695300836798794	0
Chr7	B6	0.132102430746439	0.670037577388259	0.076867794552
Chr7	B8	-0.0776933238315791	0.687007291679852	-0.09765811761435
Chr7	B9	-0.0485213423840101	0.709968794686234	-0.06837216030425
Chr7	C1	0.0907034573410931	0.683823980947763	0.0386083827082
Chr7	C10	-0.00125540071742784	0.798489107632765	0
Chr7	C11	0.00613167886835725	0.694197591368299	-0.02025784546475
Chr7	C12	-0.0369205957153724	0.67797438840754	-0.0547546022328
Chr7	C2	0.107729152241326	0.675699806913782	0.0559019632458
Chr7	C3	-0.0551069037428085	0.688851399223294	-0.0821243834404
Chr7	C4	-0.00999736892880072	0.795218771534762	-0.00202051949494
Chr7	C5	0.0730313871225321	0.699765860247192	0.0314041580765
Chr7	C6	0.0509958127629206	0.732158552344662	0.00993482662645
Chr7	C7	0.159137629760773	0.674742096872013	0.1074668307205
Chr7	C9	0.00706077873945645	0.689270685504409	-0.01851805588245
Chr7	D1	0.0553358850854296	0.678397784705219	0.00868303421496
Chr7	D10	0.0275117379552057	0.696457696841746	0
Chr7	D11	0.0239124957574138	0.762653201905843	0
Chr7	D12	0.0758520844976161	0.675453683261979	0.03326701544855
Chr7	D2	-0.0519775038193354	0.735632660180676	-0.06802545063695
Chr7	D3	-0.0387278837380741	0.713803515861201	-0.0479469957279
Chr7	D4	-0.00896776788561154	0.866814597344973	0
Chr7	D5	0.0211916270552452	0.753001777288884	0
Chr7	D6	-0.0363112731541674	0.723353707063536	-0.04771412431525
Chr7	D7	-0.0349849260336481	0.677149461022957	-0.0543643263194
Chr7	D8	0.147949580368469	0.689862810550994	0.1079033791815
Chr7	D9	0.0828122350123515	0.690373673899143	0.0390366638839
Chr7	A5	0.151599978126063	0.670857980202376	0.1036427613795
Chr7	B2	0.0590485930809076	0.711300270833262	0.0125069394371
Chr7	B7	0.00970754754047006	0.694144039975605	-0.006558762117025
Chr8	A1	0.101721691075957	0.711404869938477	0.0564548762184
Chr8	A11	0.11754741368518	0.706280303035411	0.0694954304396
Chr8	A12	0.216205387630235	0.693446506193139	0.156767088425
Chr8	A2	0.163068977645106	0.727698827024085	0.116498121432
Chr8	A4	0.0816142653952717	0.704438661643555	0.0202116742153
Chr8	A7	0.163070445374579	0.684487103284851	0.108388399462
Chr8	A8	0.163365175935484	0.712583778862396	0.107792932279
Chr8	A9	0.233796847780424	0.780024303395145	0.190680812321
Chr8	B1	0.00537482733194685	0.711081301743241	0
Chr8	B10	-0.0295362629526486	0.706552731036457	-0.0324438868347
Chr8	B11	0.0346732481450737	0.689260927990802	0
Chr8	B12	0.0445908428840305	0.685431762496215	0
Chr8	B3	0.634971381221519	0.708280103964532	0.599497178615
Chr8	B4	0.232266649524611	0.701110877361398	0.18761224331
Chr8	B5	0.119877301928776	0.70874394235269	0.0627674628816
Chr8	B6	0.000119806831008048	0.709985526372579	0
Chr8	B8	0.106099480916369	0.693119266893071	0.0555783290012
Chr8	B9	0.0812966190136991	0.720380299397168	0.0373556882147
Chr8	C1	0.227042501473371	0.691477200859173	0.177559924338
Chr8	C10	0.0972870548996829	0.807897048644305	0.0687545366524
Chr8	C11	-0.00930335939667014	0.706944068391465	-0.00775986013508
Chr8	C12	0.0261978169591657	0.69770574417514	0
Chr8	C2	0.201829887194592	0.690669007919033	0.157295254687
Chr8	C3	0.00641102258241255	0.69736056623118	-0.00923605061064
Chr8	C4	-0.0124372639770051	0.838109054452267	0
Chr8	C5	0.155088443784895	0.702046392068522	0.0993806434311
Chr8	C6	0.24808501746237	0.754196156169355	0.206872245529
Chr8	C7	0.0261425626574755	0.69715961843907	0
Chr8	C9	-0.0280368358612467	0.719639049690472	-0.0350430896844
Chr8	D1	0.108779069265873	0.6851019979059	0.0567626976877
Chr8	D10	0.121324481617435	0.712714090728383	0.076051057214
Chr8	D11	0.213207773871476	0.752377573020774	0.171955354495
Chr8	D12	0.23140472810367	0.67122995419976	0.180056038746
Chr8	D2	0.0696469297213343	0.741646564804625	0.0289296921625
Chr8	D3	0.0579332886046471	0.721691930813612	0.00555873361982
Chr8	D4	-0.0144917749479659	0.847186893034201	0
Chr8	D5	-0.095773197876258	0.740679074105623	-0.112871846316
Chr8	D6	0.0791690911612963	0.719937778263008	0.0290109645318
Chr8	D7	-0.0135667796166111	0.699971339070089	-0.0136128151054
Chr8	D8	0.178140369942313	0.701718843790272	0.123990277142
Chr8	D9	0.185547704047561	0.704306635248759	0.140489395985
Chr8	A5	0.22885424092852	0.671575930299939	0.173970454258
Chr8	B2	0.0239934432173631	0.730302413684488	0
Chr8	B7	0.219553470975102	0.715790038773085	0.177182855096
Chr9	A1	0.170432055204804	0.725621160119581	0.130248792883
Chr9	A11	0.128353965710562	0.739756881486291	0.0903785318103
Chr9	A12	0.265328628188524	0.721035807933724	0.210673602894
Chr9	A2	0.197872255020336	0.74131195732921	0.161017659831
Chr9	A4	0.101768029911346	0.723552281899675	0.0636680458553
Chr9	A7	0.282981524180427	0.714432810216655	0.226435570436
Chr9	A8	0.211280637012436	0.737310486313244	0.1763591760875
Chr9	A9	0.271263348153683	0.791436590162949	0.2312106868255
Chr9	B1	0.0380272478470364	0.720725610357734	0
Chr9	B10	-0.0469299840057779	0.729086090828022	-0.0515747443152
Chr9	B11	0.0913559747886784	0.692002932036724	0.04381587244635
Chr9	B12	0.0712108826963693	0.719557642703543	0.0172497693581
Chr9	B3	0.0893786048226507	0.774499651301247	0.04942523475905
Chr9	B4	0.281670582605009	0.714417757877607	0.239250508891
Chr9	B5	0.150006702982526	0.702093947747344	0.100348935495
Chr9	B6	-0.0128511972569162	0.71180579299314	-0.0338635847506
Chr9	B8	0.113729713752214	0.70314222232103	0.06562769103985
Chr9	B9	0.110261521537056	0.730653781403254	0.0619493568291
Chr9	C1	0.274704986340988	0.706522349946004	0.231748771894
Chr9	C10	0.164534978699582	0.819796135875846	0.1538557546725
Chr9	C11	-0.0040967191938272	0.722772502255058	-0.03187657238055
Chr9	C12	0.0743767334659306	0.707177650734877	0.03623377027055
Chr9	C2	0.23242399317897	0.711240320746256	0.1929400076575
Chr9	C3	0.00514337977988388	0.706583524069387	-0.01469460618895
Chr9	C4	0.119842638443192	0.814829598959228	0.09372684742095
Chr9	C5	0.221893868507804	0.72735732587804	0.1812150790485
Chr9	C6	0.30564647821902	0.729763103317229	0.262612943733
Chr9	C7	0.0117959682263281	0.720046197204542	0
Chr9	C9	0.00116363955063923	0.733871729364589	-0.00930734073667
Chr9	D1	0.12873988777257	0.707155843041102	0.0775581110706
Chr9	D10	0.161935598444572	0.725506891147837	0.1238526135295
Chr9	D11	0.274330315085128	0.784289219471599	0.2479300387835
Chr9	D12	0.294204856767696	0.710085687571633	0.248147160143
Chr9	D2	0.126563129129425	0.758582075604122	0.0832716824376
Chr9	D3	0.126829559205371	0.732405955874538	0.06563878558315
Chr9	D4	-0.032277408005151	0.885856190991079	0
Chr9	D5	-0.0443269647153888	0.79587148637104	-0.07367871763535
Chr9	D6	0.106984942922176	0.752826725247268	0.0692160323773
Chr9	D7	0.0463628439680002	0.703544042944285	0.005477970574975
Chr9	D8	0.23663914536787	0.725929635624352	0.192144529911
Chr9	D9	0.231794871659979	0.728948447814656	0.1865901332155
Chr9	A5	0.279610408292758	0.694241223911245	0.2316382565395
Chr9	B2	0.0534871782969226	0.737074763530925	0
Chr9	B7	0.304164925778462	0.70994546888187	0.2546971345345
