# Supplementary material for: Genetically controlled mtDNA deletions prevent ROS damage by arresting oxidative phosphorylation
Source: eLife. 2022 Jul 8;11:e76095. doi: 10.7554/eLife.76095 (PMC9427111; doi:10.7554/eLife.76095)
Supplement: Figure 6—figure supplement 5—source data 2. — Data are shown in Figure 6—figure supplement 5B. [file elife-76095-fig6-figsupp5-data2.xlsx]

## Sheet: Data S12 - Time res. seq. nuc.
README: Grand mean/median log2 coverage ratio across entire chromosome
Chromosome	Population	Batch Cycle t	Mean Log2 coverage	SD Log2 coverage	Median Log2 coverage
Chr2	B8	1	-0.0159777294340705	0.387730740827477	-0.0087187137692
Chr2	B8	15	-0.0470851580193012	0.388154203638367	-0.0278740885119
Chr2	B8	2	-0.0100761030665357	0.369481902100408	0
Chr2	B8	3	-0.0345205821743863	0.390141527119237	-0.0375378493958
Chr2	B8	4	-0.0555262491268565	0.416646534272292	-0.0498469151383
Chr2	B8	5	-0.0382065374418503	0.391825842243042	-0.0220546455633
Chr2	B8	7	-0.0488503291313011	0.387578237590776	-0.0357579316468
Chr2	B8	9	-0.0115919325970083	0.355592343844908	-0.0117346570272
Chr2	B8	0	-0.0379026014416489	0.412762837364365	-0.0112260273111
Chr2	A7	0	-0.0239477065643908	0.445787962548708	0
Chr2	A7	1	-0.109737935255289	0.511376239338378	-0.0744887736846
Chr2	A7	2	-0.0471615020447645	0.461628947170388	-0.0186945133304
Chr2	A7	3	-0.0447628912097357	0.435906753429333	-0.0172479289618
Chr2	A7	4	-0.0257532594324811	0.443134876596732	0
Chr2	A7	5	0.474414544258725	0.468205607351623	0.489840190246
Chr2	A7	7	0.767506886038757	0.396105685549123	0.780540672675
Chr2	A7	9	0.837417831234339	0.423073523260945	0.838959902911
Chr2	A7	15	0.792239441060657	0.433808498403793	0.794298784578
Chr2	A8	1	0.0290136775984711	0.337108544728387	0.0266307031025
Chr2	A8	15	0.844457853298879	0.345971294677582	0.845790670194
Chr2	A8	2	0.00665145882528852	0.323055664480536	0
Chr2	A8	3	0.0348326528017564	0.359069987121768	0.032378805941
Chr2	A8	4	0.00250329157770534	0.331877030896112	0.00281369199009
Chr2	A8	5	0.0301663154500801	0.352821889111444	0.0210866479801
Chr2	A8	7	-0.0167239830080959	0.405948707783065	0
Chr2	A8	9	0.240142335666149	0.467892998952103	0.255666086857
Chr2	A8	0	-0.0560461293872081	0.424448670277553	-0.0292646971982
Chr2	B12	1	-0.0170295614119308	0.322081538528722	-0.000641645196102
Chr2	B12	15	0.865241925363132	0.311794753182169	0.87948287215
Chr2	B12	2	-0.017370347914726	0.380344813009359	-0.00872712214412
Chr2	B12	3	-0.0325535809142162	0.371728380119839	-0.0108215549752
Chr2	B12	4	-0.0243959143113174	0.325555385648914	-0.0153920146514
Chr2	B12	5	0.23045517536324	0.348312772421615	0.223206612135
Chr2	B12	7	0.749478135015072	0.44771452612699	0.749826206536
Chr2	B12	9	0.848574898528707	0.328358279790603	0.845443093989
Chr2	B12	0	-0.0245655862644776	0.348218893935446	-0.00224725770541
Chr2	B5	1	-0.0059154443841745	0.310887640796087	-0.00464323902003
Chr2	B5	15	0.781435944723157	0.472139880156626	0.81052350317
Chr2	B5	2	-0.0411132105209446	0.382952708573678	-0.0250400995549
Chr2	B5	3	-0.0317193046702455	0.384398895136993	-0.0383481237032
Chr2	B5	4	-0.0674174783832259	0.417834827339747	-0.0370845480971
Chr2	B5	5	0.0268007162028281	0.403245093311318	0.0026430154686
Chr2	B5	7	0.674410503886472	0.396442678007183	0.674803209534
Chr2	B5	9	0.808293452162549	0.432310464735441	0.807684556296
Chr2	B5	0	-0.0849236741498289	0.592735619298505	-0.0590967972341
Chr3	B8	1	-0.00689033710252898	0.571009448928913	-0.008410424974055
Chr3	B8	15	0.103929154385976	0.431496392117945	0.05904094122635
Chr3	B8	2	-0.0312455061951683	0.53671647270715	-0.0415208014722
Chr3	B8	3	-0.0504834451546161	0.461319071948981	-0.06181964578155
Chr3	B8	4	0.00752653143414681	0.51681828296803	-0.0104004138555
Chr3	B8	5	0.0391419982452556	0.484916004333056	0
Chr3	B8	7	-0.0109961784122647	0.496899641826613	-0.01317245292035
Chr3	B8	9	-0.0285601316182189	0.429796951907451	-0.03467016591795
Chr3	B8	0	0.0223355573070529	0.39208753622317	0.0007490709534365
Chr3	A7	0	0.0629958032376767	0.467177056563209	0.0424732485829
Chr3	A7	1	0.00898527120642405	0.545411071581337	0
Chr3	A7	2	0.064546741950861	0.492693282406948	0.03202812479235
Chr3	A7	3	0.133463625285537	0.485161820745891	0.1128869693175
Chr3	A7	4	0.0948560241397119	0.472707482096116	0.0741381611942
Chr3	A7	5	0.679379581511581	0.508212250824283	0.7029155982205
Chr3	A7	7	0.958913359855396	0.499871881319378	0.990040096065
Chr3	A7	9	1.02019251179149	0.607542905039476	1.005928237355
Chr3	A7	15	1.02797996739603	0.61345344406684	1.020785940825
Chr3	A8	1	-0.0583678745182859	0.489436745887851	-0.05835301938315
Chr3	A8	15	-0.0928832325087565	0.419539008657148	-0.09811545946415
Chr3	A8	2	-0.0325678207026253	0.412225767858213	-0.04143152824055
Chr3	A8	3	0.0652430275871845	0.407733419902682	0.04810508706205
Chr3	A8	4	0.00333019830165061	0.373399939050471	0
Chr3	A8	5	0.0841764033082618	0.425531223730721	0.05301364967335
Chr3	A8	7	0.0255360517816594	0.442086353816875	0
Chr3	A8	9	-0.0864532003515479	0.528490766976821	-0.002597397348375
Chr3	A8	0	0.0401322083539456	0.480080199688731	0.00916169497006
Chr3	B12	1	0.131450656144659	0.367897881328482	0.105280359992
Chr3	B12	15	-0.103134729793607	0.44453715380561	-0.1066266392725
Chr3	B12	2	-0.0446211718722073	0.414022157605395	-0.02799652101005
Chr3	B12	3	-0.023055098996681	0.439760392744262	-0.00735290600126
Chr3	B12	4	0.0194254420340359	0.356387587950405	0
Chr3	B12	5	0.0517080143783351	0.402612829795698	0.01540762584455
Chr3	B12	7	-0.0903203004605009	0.47313744681219	-0.07596841172505
Chr3	B12	9	-0.113490483240698	0.422802051759343	-0.1233762175095
Chr3	B12	0	0.0328601013287386	0.404679663094335	0
Chr3	B5	1	0.0493289944657754	0.369908676803876	0.00699129637819
Chr3	B5	15	0.00170517083940525	0.493013000447056	0
Chr3	B5	2	0.00462511427733297	0.441136640143605	-0.002749236322345
Chr3	B5	3	-0.0271848488568792	0.485273044054048	-0.06480395329545
Chr3	B5	4	-0.0128973380341358	0.464313830408008	0
Chr3	B5	5	0.00950893678159664	0.46271704659882	-0.01516519278195
Chr3	B5	7	0.0127915639072595	0.497112236082989	0
Chr3	B5	9	-0.0741527986129208	0.592271805118355	-0.101405888265
Chr3	B5	0	-0.110973883626326	0.574338110962548	0
Chr5	B8	1	-0.0601169172976036	0.411341623205509	-0.04449713881425
Chr5	B8	15	0.282987124427014	0.368730116212119	0.278218316597
Chr5	B8	2	-0.0727402932717699	0.404903792578281	-0.0500258819777
Chr5	B8	3	0.0115994017371343	0.398643221267655	0
Chr5	B8	4	-0.0196784749230268	0.424841405145287	-0.006644815729495
Chr5	B8	5	-0.037524004051491	0.394652246303566	-0.00747611288592
Chr5	B8	7	-0.0492419866541294	0.399201930533381	-0.0348964357258
Chr5	B8	9	0.00862373125418323	0.36634819718851	0
Chr5	B8	0	0.0407029502032432	0.396349121562626	0.02429846653895
Chr5	A7	0	-0.0175184398293347	0.430125304778091	0
Chr5	A7	1	-0.0270214031033555	0.511493484258992	0
Chr5	A7	2	0.0227345688927638	0.467769001139796	0.004473922538645
Chr5	A7	3	-0.00109101045322284	0.438334176250161	0
Chr5	A7	4	0.00768768464481841	0.445637124557337	0.00711892974857
Chr5	A7	5	-0.0781613968131298	0.528307625845127	-0.03613492826555
Chr5	A7	7	-0.0690148055641075	0.456525131160529	-0.03992661579715
Chr5	A7	9	-0.0639316578236903	0.521656998447729	-0.04627138003405
Chr5	A7	15	-0.0993603602678636	0.524357408747771	-0.0823119944583
Chr5	A8	1	-0.0772658446922033	0.35690480498138	-0.0609792191858
Chr5	A8	15	-0.0773287423001898	0.346940335876788	-0.073055458245
Chr5	A8	2	-0.000920440563638564	0.321073989394698	0
Chr5	A8	3	0.0597537279498221	0.359760907169114	0.06009668143165
Chr5	A8	4	-0.00379505716340958	0.33090902606352	0
Chr5	A8	5	-0.00336416758949183	0.362755900865547	-0.00278448229942
Chr5	A8	7	-0.0242519920765822	0.378691719723737	0
Chr5	A8	9	0.391190770374934	0.482996670100358	0.3893974557175
Chr5	A8	0	-2.88444340786439e-05	0.42862826805458	0
Chr5	B12	1	0.0842539144462277	0.303105718493923	0.07374460713895
Chr5	B12	15	-0.10957326839132	0.328259238072713	-0.092123433518
Chr5	B12	2	-0.046775033181236	0.369482487601359	-0.0292001099628
Chr5	B12	3	-0.00270980273206997	0.375088231961978	0
Chr5	B12	4	0.0219391210272966	0.322956346021401	0.004995489236465
Chr5	B12	5	0.0560346127738107	0.34853716336472	0.0423423777824
Chr5	B12	7	-0.101544508534906	0.406409704261257	-0.0885906720367
Chr5	B12	9	-0.0639603801413927	0.323388512601623	-0.0630621895238
Chr5	B12	0	0.0347150628982169	0.337198581934181	0.02879748160755
Chr5	B5	1	0.0245009167082022	0.302536859905474	0.00519264378548
Chr5	B5	15	-0.017665727054754	0.474489866992771	-0.0162151362287
Chr5	B5	2	0.0438450496965098	0.369134200446944	0.02164115650195
Chr5	B5	3	0.00184423445879725	0.390139327192284	-0.0001983046705065
Chr5	B5	4	0.0066103627953525	0.372463570498716	0
Chr5	B5	5	-0.00519555554949949	0.409238129369742	-0.011026943235
Chr5	B5	7	-0.0239956504865753	0.397205261654361	-0.0151299155981
Chr5	B5	9	-0.130529917857682	0.45434297075045	-0.118383910746
Chr5	B5	0	0.0359743940535999	0.555537137129144	0
