# Supplementary material for: Genetically controlled mtDNA deletions prevent ROS damage by arresting oxidative phosphorylation
Source: eLife. 2022 Jul 8;11:e76095. doi: 10.7554/eLife.76095 (PMC9427111; doi:10.7554/eLife.76095)
Supplement: Figure 6—source data 1. — Data are shown in Figure 6B and C, Figure 6—figure supplement 2A and Figure 6—figure supplement 4B. [file elife-76095-fig6-data1.xlsx]

## Sheet: Data S13 - End point mtDNA cov.
README: Log2 coverage is capped at -1 relative to the euploid genome for each sample (> 0.5 copy)
Chromosome	Window coverage	Window start	Window end	Population	Log2 coverage (euploid genome)
chrMT	78.957	1	1000	Founder 1	3.03966033400248
chrMT	39.241	1001	2000	Founder 1	2.03095496590821
chrMT	31.568	2001	3000	Founder 1	1.71705602006496
chrMT	54.595	3001	4000	Founder 1	2.50736198905591
chrMT	86.12	4001	5000	Founder 1	3.164941478396
chrMT	61	5001	6000	Founder 1	2.66740240156638
chrMT	34.446	6001	7000	Founder 1	1.84292962033383
chrMT	84.646	7001	8000	Founder 1	3.14003505316047
chrMT	76.083	8001	9000	Founder 1	2.98616729257345
chrMT	53.997	9001	10000	Founder 1	2.491472414216
chrMT	48.827	10001	11000	Founder 1	2.34627229836364
chrMT	83.847	11001	12000	Founder 1	3.12635232476098
chrMT	91.262	12001	13000	Founder 1	3.24860742957629
chrMT	62.572	13001	14000	Founder 1	2.70411037678408
chrMT	69.568	14001	15000	Founder 1	2.85701700436872
chrMT	69.99	15001	16000	Founder 1	2.86574196693412
chrMT	117.556	16001	17000	Founder 1	3.61386942908849
chrMT	166.933	17001	18000	Founder 1	4.11979043454388
chrMT	29.832	18001	19000	Founder 1	1.63545386111505
chrMT	61.59	19001	20000	Founder 1	2.68128928705853
chrMT	22.916	20001	21000	Founder 1	1.2549484017736
chrMT	59.721	21001	22000	Founder 1	2.63683148181412
chrMT	22.672	22001	23000	Founder 1	1.23950482225942
chrMT	35.069	23001	24000	Founder 1	1.86878945131192
chrMT	64.742	24001	25000	Founder 1	2.75329509264174
chrMT	66.769	25001	26000	Founder 1	2.79777159202508
chrMT	61.944	26001	27000	Founder 1	2.68955770615653
chrMT	80.533	27001	28000	Founder 1	3.06817323628782
chrMT	86.488	28001	29000	Founder 1	3.17109313509157
chrMT	80.455	29001	30000	Founder 1	3.06677524113297
chrMT	133.888	30001	31000	Founder 1	3.80154791558835
chrMT	103.553	31001	32000	Founder 1	3.43089060378694
chrMT	35.097	32001	33000	Founder 1	1.8699408768824
chrMT	49.589	33001	34000	Founder 1	2.36861329148992
chrMT	15.234	34001	35000	Founder 1	0.665887959710067
chrMT	70.259	35001	36000	Founder 1	2.87127620164374
chrMT	74.145	36001	37000	Founder 1	2.9489425660897
chrMT	78.759	37001	38000	Founder 1	3.03603795240305
chrMT	80.846	38001	39000	Founder 1	3.07376955444606
chrMT	42.817	39001	40000	Founder 1	2.15677687482109
chrMT	42.911	40001	41000	Founder 1	2.15994068100327
chrMT	30.164	41001	42000	Founder 1	1.65142091367514
chrMT	75.606	42001	43000	Founder 1	2.97709388840023
chrMT	85.714	43001	44000	Founder 1	3.15812402345028
chrMT	56.158	44001	45000	Founder 1	2.54808471558993
chrMT	61.383	45001	46000	Founder 1	2.67643231592622
chrMT	51.625	46001	47000	Founder 1	2.42666303542294
chrMT	40.486	47001	48000	Founder 1	2.07601627127471
chrMT	161.928	48001	49000	Founder 1	4.07587372656154
chrMT	44.615	49001	50000	Founder 1	2.21612199879751
chrMT	83.285	50001	51000	Founder 1	3.11664984206553
chrMT	104.136	51001	52000	Founder 1	3.4389901508793
chrMT	23.349	52001	53000	Founder 1	1.28195392184787
chrMT	24.228	53001	54000	Founder 1	1.33526847539404
chrMT	52.125	54001	55000	Founder 1	2.44056863744816
chrMT	65.015	55001	56000	Founder 1	2.75936576824772
chrMT	32.834	56001	57000	Founder 1	1.77378367574165
chrMT	108.4	57001	58000	Founder 1	3.49688601047
chrMT	51.99	58001	59000	Founder 1	2.43682731411009
chrMT	29.673	59001	60000	Founder 1	1.62774395245411
chrMT	117.862	60001	61000	Founder 1	3.61761990637683
chrMT	122.025	61001	62000	Founder 1	3.66769800550981
chrMT	58.975	62001	63000	Founder 1	2.61869667235559
chrMT	89.858	63001	64000	Founder 1	3.22624011055643
chrMT	65.918	64001	65000	Founder 1	2.77926562966056
chrMT	35.83	65001	66000	Founder 1	1.8997612024395
chrMT	36.195	66001	67000	Founder 1	1.91438357516568
chrMT	52.873	67001	68000	Founder 1	2.46112434606617
chrMT	118.357	68001	69000	Founder 1	3.6236662878325
chrMT	96.946	69001	70000	Founder 1	3.33577453273387
chrMT	174.165	70001	71000	Founder 1	4.18097598449035
chrMT	64.782	71001	72000	Founder 1	2.75418616770845
chrMT	70.816	72001	73000	Founder 1	2.88266851514242
chrMT	146.22	73001	74000	Founder 1	3.92866191067326
chrMT	108.67	74001	75000	Founder 1	3.50047497128379
chrMT	82.56	75001	76000	Founder 1	3.10403612965202
chrMT	22.801	76001	77000	Founder 1	1.24769025799156
chrMT	70.474	1	1000	Founder 2	3.06331543729977
chrMT	39.062	1001	2000	Founder 2	2.21199015371536
chrMT	24.246	2001	3000	Founder 2	1.52397109302315
chrMT	46.798	3001	4000	Founder 2	2.47267121052501
chrMT	70.136	4001	5000	Founder 2	3.0563794887463
chrMT	44.979	5001	6000	Founder 2	2.4154759222822
chrMT	30.822	6001	7000	Founder 2	1.87018481518665
chrMT	74.098	7001	8000	Founder 2	3.13565893853618
chrMT	67.166	8001	9000	Founder 2	2.99395544896261
chrMT	54.98	9001	10000	Founder 2	2.70513124251885
chrMT	43.382	10001	11000	Founder 2	2.36332090143911
chrMT	78.162	11001	12000	Founder 2	3.21269171895644
chrMT	74.111	12001	13000	Founder 2	3.13591202756019
chrMT	50.212	13001	14000	Founder 2	2.57425652597184
chrMT	48.15	14001	15000	Founder 2	2.51376013373672
chrMT	63.923	15001	16000	Founder 2	2.92255945331371
chrMT	87.874	16001	17000	Founder 2	3.38166070217748
chrMT	129.059	17001	18000	Founder 2	3.93618318262361
chrMT	21.526	18001	19000	Founder 2	1.35230459589311
chrMT	48.784	19001	20000	Founder 2	2.53263239112828
chrMT	18.053	20001	21000	Founder 2	1.09846293596535
chrMT	49.444	21001	22000	Founder 2	2.55201979708847
chrMT	21.097	22001	23000	Founder 2	1.32326219749923
chrMT	31.059	23001	24000	Founder 2	1.88123571599636
chrMT	52.42	24001	25000	Founder 2	2.63634168933431
chrMT	52.197	25001	26000	Founder 2	2.63019122657238
chrMT	53.617	26001	27000	Founder 2	2.66891483499212
chrMT	66.936	27001	28000	Founder 2	2.989006675868
chrMT	68.344	28001	29000	Founder 2	3.01903902316718
chrMT	69.058	29001	30000	Founder 2	3.03403288833794
chrMT	107.484	30001	31000	Founder 2	3.67227434768507
chrMT	92.143	31001	32000	Founder 2	3.4500989057684
chrMT	29.61	32001	33000	Founder 2	1.81230882618345
chrMT	41.884	33001	34000	Founder 2	2.31262356457936
chrMT	16.599	34001	35000	Founder 2	0.977320665282513
chrMT	58.46	35001	36000	Founder 2	2.79367416481195
chrMT	60.19	36001	37000	Founder 2	2.83574815240722
chrMT	55.905	37001	38000	Founder 2	2.7292016554559
chrMT	56.401	38001	39000	Founder 2	2.74194507776459
chrMT	35.41	39001	40000	Founder 2	2.07038117939681
chrMT	37.712	40001	41000	Founder 2	2.1612479993687
chrMT	29.568	41001	42000	Founder 2	1.81026099753459
chrMT	65.157	42001	43000	Founder 2	2.95014451557869
chrMT	67.082	43001	44000	Founder 2	2.99215003809243
chrMT	45.228	44001	45000	Founder 2	2.42344053650405
chrMT	51.312	45001	46000	Founder 2	2.60552059456018
chrMT	48.151	46001	47000	Founder 2	2.51379009593941
chrMT	29.822	47001	48000	Founder 2	1.82260135027545
chrMT	151.65	48001	49000	Founder 2	4.16889792851743
chrMT	38.643	49001	50000	Founder 2	2.1964314359782
chrMT	69.886	50001	51000	Founder 2	3.05122781053185
chrMT	85.741	51001	52000	Founder 2	3.34620957911897
chrMT	20.166	52001	53000	Founder 2	1.25814928414769
chrMT	26.591	53001	54000	Founder 2	1.6571623688964
chrMT	45.714	54001	55000	Founder 2	2.43886039673819
chrMT	57.605	55001	56000	Founder 2	2.7724183758449
chrMT	32.208	56001	57000	Founder 2	1.93364341303987
chrMT	77.617	57001	58000	Founder 2	3.20259700779206
chrMT	40.651	58001	59000	Founder 2	2.26951517818466
chrMT	20.882	59001	60000	Founder 2	1.30848423013811
chrMT	104.108	60001	61000	Founder 2	3.62623336486866
chrMT	96.604	61001	62000	Founder 2	3.51830726241732
chrMT	40.486	62001	63000	Founder 2	2.26364744805184
chrMT	74.239	63001	64000	Founder 2	3.13840161314913
chrMT	50.539	64001	65000	Founder 2	2.58362145406001
chrMT	25.317	65001	66000	Founder 2	1.58633079487554
chrMT	27.661	66001	67000	Founder 2	1.71407764938569
chrMT	45.845	67001	68000	Founder 2	2.44298873320582
chrMT	91.863	68001	69000	Founder 2	3.44570823455941
chrMT	79.735	69001	70000	Founder 2	3.24143747572394
chrMT	140.931	70001	71000	Founder 2	4.06314142067757
chrMT	58.56	71001	72000	Founder 2	2.79613988928994
chrMT	63.592	72001	73000	Founder 2	2.91506961868905
chrMT	110.838	73001	74000	Founder 2	3.71660501422356
chrMT	77.46	74001	75000	Founder 2	3.19967583703424
chrMT	74.218	75001	76000	Founder 2	3.13799345999959
chrMT	15.648	76001	77000	Founder 2	0.892202611070766
chrMT	0.01	1	1000	A1	-1
chrMT	0.01	1001	2000	A1	-1
chrMT	0.01	2001	3000	A1	-1
chrMT	0.01	3001	4000	A1	-1
chrMT	0.056	4001	5000	A1	-1
chrMT	0.13	5001	6000	A1	-1
chrMT	0.01	6001	7000	A1	-1
chrMT	0.122	7001	8000	A1	-1
chrMT	0.084	8001	9000	A1	-1
chrMT	0.01	9001	10000	A1	-1
chrMT	0.01	10001	11000	A1	-1
chrMT	0.074	11001	12000	A1	-1
chrMT	0.01	12001	13000	A1	-1
chrMT	0.01	13001	14000	A1	-1
chrMT	0.056	14001	15000	A1	-1
chrMT	0.01	15001	16000	A1	-1
chrMT	0.01	16001	17000	A1	-1
chrMT	1.434	17001	18000	A1	-1
chrMT	12.453	18001	19000	A1	-0.925590832774698
chrMT	0.01	19001	20000	A1	-1
chrMT	0.01	20001	21000	A1	-1
chrMT	0.05	21001	22000	A1	-1
chrMT	417.912	22001	23000	A1	4.14304310939617
chrMT	39.962	23001	24000	A1	0.756544617732401
chrMT	0.01	24001	25000	A1	-1
chrMT	2.096	25001	26000	A1	-1
chrMT	0.07	26001	27000	A1	-1
chrMT	0.025	27001	28000	A1	-1
chrMT	0.943	28001	29000	A1	-1
chrMT	0.052	29001	30000	A1	-1
chrMT	0.01	30001	31000	A1	-1
chrMT	0.01	31001	32000	A1	-1
chrMT	0.086	32001	33000	A1	-1
chrMT	0.446	33001	34000	A1	-1
chrMT	0.01	34001	35000	A1	-1
chrMT	0.07	35001	36000	A1	-1
chrMT	0.01	36001	37000	A1	-1
chrMT	0.104	37001	38000	A1	-1
chrMT	0.01	38001	39000	A1	-1
chrMT	0.01	39001	40000	A1	-1
chrMT	0.258	40001	41000	A1	-1
chrMT	0.01	41001	42000	A1	-1
chrMT	0.01	42001	43000	A1	-1
chrMT	0.01	43001	44000	A1	-1
chrMT	0.01	44001	45000	A1	-1
chrMT	0.074	45001	46000	A1	-1
chrMT	0.048	46001	47000	A1	-1
chrMT	0.01	47001	48000	A1	-1
chrMT	0.01	48001	49000	A1	-1
chrMT	0.01	49001	50000	A1	-1
chrMT	0.634	50001	51000	A1	-1
chrMT	0.01	51001	52000	A1	-1
chrMT	0.01	52001	53000	A1	-1
chrMT	0.01	53001	54000	A1	-1
chrMT	0.11	54001	55000	A1	-1
chrMT	0.034	55001	56000	A1	-1
chrMT	0.01	56001	57000	A1	-1
chrMT	0.01	57001	58000	A1	-1
chrMT	0.054	58001	59000	A1	-1
chrMT	0.01	59001	60000	A1	-1
chrMT	0.05	60001	61000	A1	-1
chrMT	0.01	61001	62000	A1	-1
chrMT	0.098	62001	63000	A1	-1
chrMT	0.01	63001	64000	A1	-1
chrMT	0.01	64001	65000	A1	-1
chrMT	0.01	65001	66000	A1	-1
chrMT	0.01	66001	67000	A1	-1
chrMT	0.096	67001	68000	A1	-1
chrMT	0.104	68001	69000	A1	-1
chrMT	0.01	69001	70000	A1	-1
chrMT	0.01	70001	71000	A1	-1
chrMT	0.01	71001	72000	A1	-1
chrMT	0.01	72001	73000	A1	-1
chrMT	0.01	73001	74000	A1	-1
chrMT	0.01	74001	75000	A1	-1
chrMT	0.01	75001	76000	A1	-1
chrMT	0.06	76001	77000	A1	-1
chrMT	0.01	1	1000	A2	-1
chrMT	0.01	1001	2000	A2	-1
chrMT	0.01	2001	3000	A2	-1
chrMT	0.01	3001	4000	A2	-1
chrMT	0.01	4001	5000	A2	-1
chrMT	0.01	5001	6000	A2	-1
chrMT	0.01	6001	7000	A2	-1
chrMT	0.057	7001	8000	A2	-1
chrMT	0.01	8001	9000	A2	-1
chrMT	0.01	9001	10000	A2	-1
chrMT	0.01	10001	11000	A2	-1
chrMT	0.01	11001	12000	A2	-1
chrMT	0.01	12001	13000	A2	-1
chrMT	0.01	13001	14000	A2	-1
chrMT	0.01	14001	15000	A2	-1
chrMT	0.01	15001	16000	A2	-1
chrMT	0.01	16001	17000	A2	-1
chrMT	0.01	17001	18000	A2	-1
chrMT	0.01	18001	19000	A2	-1
chrMT	0.071	19001	20000	A2	-1
chrMT	0.01	20001	21000	A2	-1
chrMT	0.136	21001	22000	A2	-1
chrMT	0.01	22001	23000	A2	-1
chrMT	0.01	23001	24000	A2	-1
chrMT	0.01	24001	25000	A2	-1
chrMT	0.01	25001	26000	A2	-1
chrMT	0.01	26001	27000	A2	-1
chrMT	0.01	27001	28000	A2	-1
chrMT	0.01	28001	29000	A2	-1
chrMT	0.01	29001	30000	A2	-1
chrMT	0.01	30001	31000	A2	-1
chrMT	0.01	31001	32000	A2	-1
chrMT	0.01	32001	33000	A2	-1
chrMT	0.01	33001	34000	A2	-1
chrMT	0.01	34001	35000	A2	-1
chrMT	0.01	35001	36000	A2	-1
chrMT	0.01	36001	37000	A2	-1
chrMT	0.01	37001	38000	A2	-1
chrMT	0.01	38001	39000	A2	-1
chrMT	0.01	39001	40000	A2	-1
chrMT	0.01	40001	41000	A2	-1
chrMT	0.01	41001	42000	A2	-1
chrMT	0.01	42001	43000	A2	-1
chrMT	0.01	43001	44000	A2	-1
chrMT	0.01	44001	45000	A2	-1
chrMT	0.01	45001	46000	A2	-1
chrMT	0.098	46001	47000	A2	-1
chrMT	0.01	47001	48000	A2	-1
chrMT	0.104	48001	49000	A2	-1
chrMT	0.01	49001	50000	A2	-1
chrMT	0.106	50001	51000	A2	-1
chrMT	0.01	51001	52000	A2	-1
chrMT	0.01	52001	53000	A2	-1
chrMT	0.01	53001	54000	A2	-1
chrMT	0.01	54001	55000	A2	-1
chrMT	0.01	55001	56000	A2	-1
chrMT	13.359	56001	57000	A2	-0.757233468496304
chrMT	96.352	57001	58000	A2	2.09326912706431
chrMT	0.01	58001	59000	A2	-1
chrMT	0.01	59001	60000	A2	-1
chrMT	0.01	60001	61000	A2	-1
chrMT	0.01	61001	62000	A2	-1
chrMT	0.01	62001	63000	A2	-1
chrMT	0.01	63001	64000	A2	-1
chrMT	0.01	64001	65000	A2	-1
chrMT	0.01	65001	66000	A2	-1
chrMT	0.01	66001	67000	A2	-1
chrMT	0.01	67001	68000	A2	-1
chrMT	0.01	68001	69000	A2	-1
chrMT	0.01	69001	70000	A2	-1
chrMT	0.052	70001	71000	A2	-1
chrMT	0.01	71001	72000	A2	-1
chrMT	0.01	72001	73000	A2	-1
chrMT	0.01	73001	74000	A2	-1
chrMT	0.01	74001	75000	A2	-1
chrMT	0.01	75001	76000	A2	-1
chrMT	0.01	76001	77000	A2	-1
chrMT	0.01	1	1000	A4	-1
chrMT	0.01	1001	2000	A4	-1
chrMT	0.01	2001	3000	A4	-1
chrMT	0.106	3001	4000	A4	-1
chrMT	0.118	4001	5000	A4	-1
chrMT	0.01	5001	6000	A4	-1
chrMT	0.01	6001	7000	A4	-1
chrMT	0.01	7001	8000	A4	-1
chrMT	0.01	8001	9000	A4	-1
chrMT	0.01	9001	10000	A4	-1
chrMT	0.01	10001	11000	A4	-1
chrMT	0.01	11001	12000	A4	-1
chrMT	0.01	12001	13000	A4	-1
chrMT	0.01	13001	14000	A4	-1
chrMT	0.01	14001	15000	A4	-1
chrMT	0.01	15001	16000	A4	-1
chrMT	0.01	16001	17000	A4	-1
chrMT	0.08	17001	18000	A4	-1
chrMT	0.01	18001	19000	A4	-1
chrMT	0.01	19001	20000	A4	-1
chrMT	0.01	20001	21000	A4	-1
chrMT	0.106	21001	22000	A4	-1
chrMT	0.216	22001	23000	A4	-1
chrMT	0.086	23001	24000	A4	-1
chrMT	0.01	24001	25000	A4	-1
chrMT	0.255	25001	26000	A4	-1
chrMT	0.01	26001	27000	A4	-1
chrMT	0.01	27001	28000	A4	-1
chrMT	0.01	28001	29000	A4	-1
chrMT	0.01	29001	30000	A4	-1
chrMT	0.01	30001	31000	A4	-1
chrMT	0.01	31001	32000	A4	-1
chrMT	0.01	32001	33000	A4	-1
chrMT	0.048	33001	34000	A4	-1
chrMT	0.01	34001	35000	A4	-1
chrMT	0.064	35001	36000	A4	-1
chrMT	0.01	36001	37000	A4	-1
chrMT	0.01	37001	38000	A4	-1
chrMT	0.086	38001	39000	A4	-1
chrMT	0.256	39001	40000	A4	-1
chrMT	0.01	40001	41000	A4	-1
chrMT	0.01	41001	42000	A4	-1
chrMT	0.236	42001	43000	A4	-1
chrMT	0.01	43001	44000	A4	-1
chrMT	0.01	44001	45000	A4	-1
chrMT	0.068	45001	46000	A4	-1
chrMT	0.01	46001	47000	A4	-1
chrMT	0.08	47001	48000	A4	-1
chrMT	0.01	48001	49000	A4	-1
chrMT	0.071	49001	50000	A4	-1
chrMT	0.167	50001	51000	A4	-1
chrMT	0.069	51001	52000	A4	-1
chrMT	0.068	52001	53000	A4	-1
chrMT	0.01	53001	54000	A4	-1
chrMT	0.01	54001	55000	A4	-1
chrMT	0.204	55001	56000	A4	-1
chrMT	47.878	56001	57000	A4	0.789060309126186
chrMT	2.076	57001	58000	A4	-1
chrMT	0.081	58001	59000	A4	-1
chrMT	0.01	59001	60000	A4	-1
chrMT	0.01	60001	61000	A4	-1
chrMT	0.048	61001	62000	A4	-1
chrMT	0.058	62001	63000	A4	-1
chrMT	0.01	63001	64000	A4	-1
chrMT	0.06	64001	65000	A4	-1
chrMT	0.01	65001	66000	A4	-1
chrMT	0.01	66001	67000	A4	-1
chrMT	0.01	67001	68000	A4	-1
chrMT	0.01	68001	69000	A4	-1
chrMT	0.136	69001	70000	A4	-1
chrMT	0.01	70001	71000	A4	-1
chrMT	0.01	71001	72000	A4	-1
chrMT	0.01	72001	73000	A4	-1
chrMT	0.01	73001	74000	A4	-1
chrMT	0.01	74001	75000	A4	-1
chrMT	0.01	75001	76000	A4	-1
chrMT	0.01	76001	77000	A4	-1
chrMT	0.01	1	1000	A5	-1
chrMT	0.01	1001	2000	A5	-1
chrMT	0.01	2001	3000	A5	-1
chrMT	45.29	3001	4000	A5	0.354139637052158
chrMT	0.088	4001	5000	A5	-1
chrMT	0.01	5001	6000	A5	-1
chrMT	0.01	6001	7000	A5	-1
chrMT	0.094	7001	8000	A5	-1
chrMT	0.01	8001	9000	A5	-1
chrMT	0.01	9001	10000	A5	-1
chrMT	0.01	10001	11000	A5	-1
chrMT	0.01	11001	12000	A5	-1
chrMT	0.01	12001	13000	A5	-1
chrMT	0.11	13001	14000	A5	-1
chrMT	0.01	14001	15000	A5	-1
chrMT	0.016	15001	16000	A5	-1
chrMT	0.162	16001	17000	A5	-1
chrMT	0.072	17001	18000	A5	-1
chrMT	0.102	18001	19000	A5	-1
chrMT	0.01	19001	20000	A5	-1
chrMT	0.01	20001	21000	A5	-1
chrMT	0.01	21001	22000	A5	-1
chrMT	0.01	22001	23000	A5	-1
chrMT	0.01	23001	24000	A5	-1
chrMT	0.088	24001	25000	A5	-1
chrMT	6.399	25001	26000	A5	-1
chrMT	0.014	26001	27000	A5	-1
chrMT	0.552	27001	28000	A5	-1
chrMT	0.01	28001	29000	A5	-1
chrMT	0.01	29001	30000	A5	-1
chrMT	0.01	30001	31000	A5	-1
chrMT	0.01	31001	32000	A5	-1
chrMT	0.01	32001	33000	A5	-1
chrMT	0.01	33001	34000	A5	-1
chrMT	0.01	34001	35000	A5	-1
chrMT	0.01	35001	36000	A5	-1
chrMT	0.01	36001	37000	A5	-1
chrMT	0.01	37001	38000	A5	-1
chrMT	0.164	38001	39000	A5	-1
chrMT	0.01	39001	40000	A5	-1
chrMT	0.01	40001	41000	A5	-1
chrMT	0.01	41001	42000	A5	-1
chrMT	0.01	42001	43000	A5	-1
chrMT	0.01	43001	44000	A5	-1
chrMT	0.057	44001	45000	A5	-1
chrMT	0.01	45001	46000	A5	-1
chrMT	0.01	46001	47000	A5	-1
chrMT	0.01	47001	48000	A5	-1
chrMT	0.01	48001	49000	A5	-1
chrMT	0.069	49001	50000	A5	-1
chrMT	276.599	50001	51000	A5	2.96467113321326
chrMT	893.173	51001	52000	A5	4.65581483270107
chrMT	365.316	52001	53000	A5	3.36602013435751
chrMT	319.935	53001	54000	A5	3.17465402046729
chrMT	574.393	54001	55000	A5	4.01891336001535
chrMT	251.138	55001	56000	A5	2.82535553364088
chrMT	181.868	56001	57000	A5	2.35976691309677
chrMT	11.522	57001	58000	A5	-1
chrMT	0.01	58001	59000	A5	-1
chrMT	0.01	59001	60000	A5	-1
chrMT	0.01	60001	61000	A5	-1
chrMT	0.239	61001	62000	A5	-1
chrMT	0.01	62001	63000	A5	-1
chrMT	1.594	63001	64000	A5	-1
chrMT	0.408	64001	65000	A5	-1
chrMT	0.088	65001	66000	A5	-1
chrMT	3.122	66001	67000	A5	-1
chrMT	0.01	67001	68000	A5	-1
chrMT	0.01	68001	69000	A5	-1
chrMT	0.01	69001	70000	A5	-1
chrMT	0.102	70001	71000	A5	-1
chrMT	0.01	71001	72000	A5	-1
chrMT	0.01	72001	73000	A5	-1
chrMT	0.01	73001	74000	A5	-1
chrMT	0.01	74001	75000	A5	-1
chrMT	0.01	75001	76000	A5	-1
chrMT	0.01	76001	77000	A5	-1
chrMT	0.01	1	1000	A7	-1
chrMT	0.102	1001	2000	A7	-1
chrMT	0.01	2001	3000	A7	-1
chrMT	18.394	3001	4000	A7	-0.531322952614877
chrMT	0.484	4001	5000	A7	-1
chrMT	0.778	5001	6000	A7	-1
chrMT	0.092	6001	7000	A7	-1
chrMT	0.01	7001	8000	A7	-1
chrMT	0.01	8001	9000	A7	-1
chrMT	0.01	9001	10000	A7	-1
chrMT	0.01	10001	11000	A7	-1
chrMT	0.062	11001	12000	A7	-1
chrMT	0.01	12001	13000	A7	-1
chrMT	0.01	13001	14000	A7	-1
chrMT	0.01	14001	15000	A7	-1
chrMT	0.22	15001	16000	A7	-1
chrMT	3.098	16001	17000	A7	-1
chrMT	2.814	17001	18000	A7	-1
chrMT	0.128	18001	19000	A7	-1
chrMT	0.06	19001	20000	A7	-1
chrMT	0.01	20001	21000	A7	-1
chrMT	0.01	21001	22000	A7	-1
chrMT	0.01	22001	23000	A7	-1
chrMT	0.01	23001	24000	A7	-1
chrMT	0.01	24001	25000	A7	-1
chrMT	1.458	25001	26000	A7	-1
chrMT	0.256	26001	27000	A7	-1
chrMT	0.578	27001	28000	A7	-1
chrMT	35.495	28001	29000	A7	0.41705761567915
chrMT	171.547	29001	30000	A7	2.68997379312728
chrMT	317.826	30001	31000	A7	3.57960704703458
chrMT	285.022	31001	32000	A7	3.42244317765703
chrMT	105.4	32001	33000	A7	1.98724476371991
chrMT	214.511	33001	34000	A7	3.0124215269337
chrMT	62.143	34001	35000	A7	1.22503369218505
chrMT	279.004	35001	36000	A7	3.39165570245084
chrMT	291.546	36001	37000	A7	3.45509342592069
chrMT	201.877	37001	38000	A7	2.92484644943451
chrMT	235.728	38001	39000	A7	3.14849303022443
chrMT	194.803	39001	40000	A7	2.87338579209007
chrMT	189.972	40001	41000	A7	2.8371566919434
chrMT	159.594	41001	42000	A7	2.58577631062985
chrMT	363.591	42001	43000	A7	3.77368638556154
chrMT	445.342	43001	44000	A7	4.06628357485025
chrMT	269.138	44001	45000	A7	3.33971599839253
chrMT	290.776	45001	46000	A7	3.45127809409767
chrMT	285.284	46001	47000	A7	3.42376873315637
chrMT	282.349	47001	48000	A7	3.40884941845677
chrMT	1606.373	48001	49000	A7	5.91710491734481
chrMT	319.439	49001	50000	A7	3.58691035749574
chrMT	506.093	50001	51000	A7	4.25077241666516
chrMT	392.11	51001	52000	A7	3.88262833218878
chrMT	215.827	52001	53000	A7	3.02124525429315
chrMT	243.197	53001	54000	A7	3.19349532901387
chrMT	378.968	54001	55000	A7	3.83344592933537
chrMT	310.088	55001	56000	A7	3.54404759336455
chrMT	255.96	56001	57000	A7	3.26728826825706
chrMT	396.668	57001	58000	A7	3.89930191383115
chrMT	266.846	58001	59000	A7	3.32737728235089
chrMT	242.394	59001	60000	A7	3.18872388484039
chrMT	1174.292	60001	61000	A7	5.46508918591603
chrMT	740.805	61001	62000	A7	4.8004637327226
chrMT	157.271	62001	63000	A7	2.56462256614222
chrMT	41.554	63001	64000	A7	0.644429159777373
chrMT	0.346	64001	65000	A7	-1
chrMT	1.082	65001	66000	A7	-1
chrMT	1.012	66001	67000	A7	-1
chrMT	0.01	67001	68000	A7	-1
chrMT	0.01	68001	69000	A7	-1
chrMT	0.01	69001	70000	A7	-1
chrMT	0.01	70001	71000	A7	-1
chrMT	0.218	71001	72000	A7	-1
chrMT	0.01	72001	73000	A7	-1
chrMT	0.08	73001	74000	A7	-1
chrMT	0.01	74001	75000	A7	-1
chrMT	0.01	75001	76000	A7	-1
chrMT	0.01	76001	77000	A7	-1
chrMT	0.01	1	1000	A8	-1
chrMT	0.01	1001	2000	A8	-1
chrMT	0.01	2001	3000	A8	-1
chrMT	119.293	3001	4000	A8	2.54433664126164
chrMT	0.01	4001	5000	A8	-1
chrMT	0.01	5001	6000	A8	-1
chrMT	0.064	6001	7000	A8	-1
chrMT	0.01	7001	8000	A8	-1
chrMT	0.01	8001	9000	A8	-1
chrMT	0.148	9001	10000	A8	-1
chrMT	0.01	10001	11000	A8	-1
chrMT	0.408	11001	12000	A8	-1
chrMT	0.172	12001	13000	A8	-1
chrMT	0.318	13001	14000	A8	-1
chrMT	0.01	14001	15000	A8	-1
chrMT	0.108	15001	16000	A8	-1
chrMT	0.138	16001	17000	A8	-1
chrMT	0.206	17001	18000	A8	-1
chrMT	0.096	18001	19000	A8	-1
chrMT	0.138	19001	20000	A8	-1
chrMT	0.128	20001	21000	A8	-1
chrMT	0.172	21001	22000	A8	-1
chrMT	0.22	22001	23000	A8	-1
chrMT	0.052	23001	24000	A8	-1
chrMT	0.328	24001	25000	A8	-1
chrMT	0.354	25001	26000	A8	-1
chrMT	0.01	26001	27000	A8	-1
chrMT	0.01	27001	28000	A8	-1
chrMT	0.052	28001	29000	A8	-1
chrMT	0.09	29001	30000	A8	-1
chrMT	0.788	30001	31000	A8	-1
chrMT	0.174	31001	32000	A8	-1
chrMT	0.048	32001	33000	A8	-1
chrMT	1.29	33001	34000	A8	-1
chrMT	0.064	34001	35000	A8	-1
chrMT	0.262	35001	36000	A8	-1
chrMT	0.05	36001	37000	A8	-1
chrMT	0.337	37001	38000	A8	-1
chrMT	0.628	38001	39000	A8	-1
chrMT	0.205	39001	40000	A8	-1
chrMT	0.092	40001	41000	A8	-1
chrMT	0.01	41001	42000	A8	-1
chrMT	0.206	42001	43000	A8	-1
chrMT	0.01	43001	44000	A8	-1
chrMT	0.01	44001	45000	A8	-1
chrMT	0.052	45001	46000	A8	-1
chrMT	0.652	46001	47000	A8	-1
chrMT	0.01	47001	48000	A8	-1
chrMT	0.01	48001	49000	A8	-1
chrMT	0.052	49001	50000	A8	-1
chrMT	2.602	50001	51000	A8	-1
chrMT	0.53	51001	52000	A8	-1
chrMT	0.01	52001	53000	A8	-1
chrMT	0.618	53001	54000	A8	-1
chrMT	0.762	54001	55000	A8	-1
chrMT	0.756	55001	56000	A8	-1
chrMT	1.365	56001	57000	A8	-1
chrMT	0.01	57001	58000	A8	-1
chrMT	8.965	58001	59000	A8	-1
chrMT	0.394	59001	60000	A8	-1
chrMT	0.334	60001	61000	A8	-1
chrMT	0.55	61001	62000	A8	-1
chrMT	0.252	62001	63000	A8	-1
chrMT	0.01	63001	64000	A8	-1
chrMT	0.048	64001	65000	A8	-1
chrMT	0.094	65001	66000	A8	-1
chrMT	0.136	66001	67000	A8	-1
chrMT	0.102	67001	68000	A8	-1
chrMT	0.01	68001	69000	A8	-1
chrMT	0.01	69001	70000	A8	-1
chrMT	0.01	70001	71000	A8	-1
chrMT	0.01	71001	72000	A8	-1
chrMT	0.01	72001	73000	A8	-1
chrMT	0.01	73001	74000	A8	-1
chrMT	0.316	74001	75000	A8	-1
chrMT	0.088	75001	76000	A8	-1
chrMT	0.01	76001	77000	A8	-1
chrMT	0.116	1	1000	A9	-1
chrMT	0.01	1001	2000	A9	-1
chrMT	0.01	2001	3000	A9	-1
chrMT	0.01	3001	4000	A9	-1
chrMT	0.01	4001	5000	A9	-1
chrMT	0.01	5001	6000	A9	-1
chrMT	0.01	6001	7000	A9	-1
chrMT	0.108	7001	8000	A9	-1
chrMT	0.128	8001	9000	A9	-1
chrMT	0.01	9001	10000	A9	-1
chrMT	0.01	10001	11000	A9	-1
chrMT	0.094	11001	12000	A9	-1
chrMT	0.01	12001	13000	A9	-1
chrMT	0.01	13001	14000	A9	-1
chrMT	0.236	14001	15000	A9	-1
chrMT	0.01	15001	16000	A9	-1
chrMT	0.053	16001	17000	A9	-1
chrMT	0.24	17001	18000	A9	-1
chrMT	18.558	18001	19000	A9	0.538830883636971
chrMT	0.01	19001	20000	A9	-1
chrMT	0.01	20001	21000	A9	-1
chrMT	0.01	21001	22000	A9	-1
chrMT	0.124	22001	23000	A9	-1
chrMT	0.01	23001	24000	A9	-1
chrMT	1788.19	24001	25000	A9	7.12914586904706
chrMT	479.941	25001	26000	A9	5.23157480293234
chrMT	0.01	26001	27000	A9	-1
chrMT	0.01	27001	28000	A9	-1
chrMT	0.01	28001	29000	A9	-1
chrMT	0.01	29001	30000	A9	-1
chrMT	0.01	30001	31000	A9	-1
chrMT	0.224	31001	32000	A9	-1
chrMT	0.01	32001	33000	A9	-1
chrMT	0.098	33001	34000	A9	-1
chrMT	0.01	34001	35000	A9	-1
chrMT	0.064	35001	36000	A9	-1
chrMT	0.048	36001	37000	A9	-1
chrMT	0.138	37001	38000	A9	-1
chrMT	0.354	38001	39000	A9	-1
chrMT	0.044	39001	40000	A9	-1
chrMT	0.01	40001	41000	A9	-1
chrMT	0.078	41001	42000	A9	-1
chrMT	0.068	42001	43000	A9	-1
chrMT	0.01	43001	44000	A9	-1
chrMT	0.074	44001	45000	A9	-1
chrMT	0.15	45001	46000	A9	-1
chrMT	0.01	46001	47000	A9	-1
chrMT	0.01	47001	48000	A9	-1
chrMT	0.01	48001	49000	A9	-1
chrMT	0.094	49001	50000	A9	-1
chrMT	0.01	50001	51000	A9	-1
chrMT	0.514	51001	52000	A9	-1
chrMT	0.01	52001	53000	A9	-1
chrMT	0.01	53001	54000	A9	-1
chrMT	0.01	54001	55000	A9	-1
chrMT	0.11	55001	56000	A9	-1
chrMT	0.112	56001	57000	A9	-1
chrMT	0.072	57001	58000	A9	-1
chrMT	0.066	58001	59000	A9	-1
chrMT	0.05	59001	60000	A9	-1
chrMT	0.01	60001	61000	A9	-1
chrMT	0.048	61001	62000	A9	-1
chrMT	0.01	62001	63000	A9	-1
chrMT	0.01	63001	64000	A9	-1
chrMT	0.102	64001	65000	A9	-1
chrMT	0.01	65001	66000	A9	-1
chrMT	0.258	66001	67000	A9	-1
chrMT	0.01	67001	68000	A9	-1
chrMT	0.01	68001	69000	A9	-1
chrMT	0.01	69001	70000	A9	-1
chrMT	0.01	70001	71000	A9	-1
chrMT	0.01	71001	72000	A9	-1
chrMT	0.092	72001	73000	A9	-1
chrMT	0.01	73001	74000	A9	-1
chrMT	0.01	74001	75000	A9	-1
chrMT	0.01	75001	76000	A9	-1
chrMT	0.01	76001	77000	A9	-1
chrMT	0.01	1	1000	A11	-1
chrMT	0.01	1001	2000	A11	-1
chrMT	0.01	2001	3000	A11	-1
chrMT	9.108	3001	4000	A11	-1
chrMT	1.152	4001	5000	A11	-1
chrMT	1.404	5001	6000	A11	-1
chrMT	0.01	6001	7000	A11	-1
chrMT	0.01	7001	8000	A11	-1
chrMT	0.01	8001	9000	A11	-1
chrMT	0.01	9001	10000	A11	-1
chrMT	0.01	10001	11000	A11	-1
chrMT	0.01	11001	12000	A11	-1
chrMT	0.01	12001	13000	A11	-1
chrMT	0.01	13001	14000	A11	-1
chrMT	0.01	14001	15000	A11	-1
chrMT	0.08	15001	16000	A11	-1
chrMT	6.722	16001	17000	A11	-1
chrMT	7.808	17001	18000	A11	-1
chrMT	0.888	18001	19000	A11	-1
chrMT	0.01	19001	20000	A11	-1
chrMT	0.01	20001	21000	A11	-1
chrMT	0.01	21001	22000	A11	-1
chrMT	0.01	22001	23000	A11	-1
chrMT	0.01	23001	24000	A11	-1
chrMT	0.326	24001	25000	A11	-1
chrMT	0.01	25001	26000	A11	-1
chrMT	0.01	26001	27000	A11	-1
chrMT	0.072	27001	28000	A11	-1
chrMT	0.01	28001	29000	A11	-1
chrMT	0.01	29001	30000	A11	-1
chrMT	0.01	30001	31000	A11	-1
chrMT	0.099	31001	32000	A11	-1
chrMT	0.01	32001	33000	A11	-1
chrMT	0.01	33001	34000	A11	-1
chrMT	0.01	34001	35000	A11	-1
chrMT	0.01	35001	36000	A11	-1
chrMT	0.01	36001	37000	A11	-1
chrMT	0.01	37001	38000	A11	-1
chrMT	1.596	38001	39000	A11	-1
chrMT	0.01	39001	40000	A11	-1
chrMT	0.01	40001	41000	A11	-1
chrMT	0.01	41001	42000	A11	-1
chrMT	0.01	42001	43000	A11	-1
chrMT	0.01	43001	44000	A11	-1
chrMT	0.01	44001	45000	A11	-1
chrMT	2.848	45001	46000	A11	-1
chrMT	0.198	46001	47000	A11	-1
chrMT	0.01	47001	48000	A11	-1
chrMT	0.01	48001	49000	A11	-1
chrMT	0.01	49001	50000	A11	-1
chrMT	0.01	50001	51000	A11	-1
chrMT	7.292	51001	52000	A11	-1
chrMT	0.01	52001	53000	A11	-1
chrMT	0.01	53001	54000	A11	-1
chrMT	2.525	54001	55000	A11	-1
chrMT	652.482	55001	56000	A11	4.86378792741388
chrMT	549.713	56001	57000	A11	4.61652842241123
chrMT	793.907	57001	58000	A11	5.14681984158203
chrMT	575.916	58001	59000	A11	4.68370822806234
chrMT	535.487	59001	60000	A11	4.57870137590558
chrMT	2500.921	60001	61000	A11	6.80223740551578
chrMT	1797.453	61001	62000	A11	6.32573196705971
chrMT	863.47	62001	63000	A11	5.26799587906376
chrMT	841.014	63001	64000	A11	5.22997964137121
chrMT	522.727	64001	65000	A11	4.54390750436063
chrMT	437.958	65001	66000	A11	4.2886423473371
chrMT	5.108	66001	67000	A11	-1
chrMT	0.01	67001	68000	A11	-1
chrMT	0.01	68001	69000	A11	-1
chrMT	0.01	69001	70000	A11	-1
chrMT	0.01	70001	71000	A11	-1
chrMT	0.01	71001	72000	A11	-1
chrMT	0.01	72001	73000	A11	-1
chrMT	0.01	73001	74000	A11	-1
chrMT	0.01	74001	75000	A11	-1
chrMT	0.01	75001	76000	A11	-1
chrMT	0.01	76001	77000	A11	-1
chrMT	163.325	1	1000	A12	2.53725649455056
chrMT	69.044	1001	2000	A12	1.29509880805917
chrMT	57.196	2001	3000	A12	1.023497015635
chrMT	55.356	3001	4000	A12	0.976322458161505
chrMT	122.244	4001	5000	A12	2.11927451113279
chrMT	68.443	5001	6000	A12	1.28248575748184
chrMT	65.228	6001	7000	A12	1.21307415367122
chrMT	176.297	7001	8000	A12	2.6475187797138
chrMT	168.985	8001	9000	A12	2.58640604578024
chrMT	95.767	9001	10000	A12	1.76711136851501
chrMT	91.031	10001	11000	A12	1.69394068908438
chrMT	173.72	11001	12000	A12	2.62627471271595
chrMT	138.691	12001	13000	A12	2.30138502548204
chrMT	106.658	13001	14000	A12	1.92250303546864
chrMT	119.454	14001	15000	A12	2.08596601905818
chrMT	123.611	15001	16000	A12	2.13531798753048
chrMT	98.108	16001	17000	A12	1.80195354254347
chrMT	189.147	17001	18000	A12	2.74901874925618
chrMT	46.933	18001	19000	A12	0.73818544161553
chrMT	84.393	19001	20000	A12	1.58470609909237
chrMT	27.304	20001	21000	A12	-0.0433049205264415
chrMT	71.88	21001	22000	A12	1.353173168772
chrMT	38.454	22001	23000	A12	0.450716435614853
chrMT	25.567	23001	24000	A12	-0.138134353608099
chrMT	106.574	24001	25000	A12	1.92136637315056
chrMT	90.021	25001	26000	A12	1.67784435094207
chrMT	103.328	26001	27000	A12	1.87674210598867
chrMT	115.842	27001	28000	A12	2.04166927053909
chrMT	96.511	28001	29000	A12	1.7782761452171
chrMT	171.092	29001	30000	A12	2.60428315800437
chrMT	331.734	30001	31000	A12	3.5595377388627
chrMT	279.321	31001	32000	A12	3.31143489766297
chrMT	92.825	32001	33000	A12	1.72209617000416
chrMT	104.242	33001	34000	A12	1.88944752382253
chrMT	29.358	34001	35000	A12	0.0613364485288897
chrMT	119.467	35001	36000	A12	2.08612301685704
chrMT	127.927	36001	37000	A12	2.18483164330917
chrMT	91.631	37001	38000	A12	1.70341852396826
chrMT	97.461	38001	39000	A12	1.79240778532365
chrMT	75.694	39001	40000	A12	1.42776170725129
chrMT	78.486	40001	41000	A12	1.48001809505123
chrMT	61.736	41001	42000	A12	1.13369477078276
chrMT	137.217	42001	43000	A12	2.285970084838
chrMT	200.955	43001	44000	A12	2.83638332862749
chrMT	108.343	44001	45000	A12	1.94511679927658
chrMT	117.425	45001	46000	A12	2.06125044840721
chrMT	93.125	46001	47000	A12	1.7267512803863
chrMT	71.382	47001	48000	A12	1.34314308369353
chrMT	413.332	48001	49000	A12	3.87681191572738
chrMT	82.189	49001	50000	A12	1.54652807953205
chrMT	102.541	50001	51000	A12	1.86571172717375
chrMT	75.08	51001	52000	A12	1.41601141009293
chrMT	40.43	52001	53000	A12	0.52300896353375
chrMT	45.7	53001	54000	A12	0.699776925207487
chrMT	73.664	54001	55000	A12	1.38854249850692
chrMT	59.543	55001	56000	A12	1.08151467172663
chrMT	51.567	56001	57000	A12	0.874030876606955
chrMT	71.383	57001	58000	A12	1.34316329446005
chrMT	52.786	58001	59000	A12	0.907738106008339
chrMT	45.453	59001	60000	A12	0.691958278596283
chrMT	239.433	60001	61000	A12	3.08913286112522
chrMT	173.522	61001	62000	A12	2.62462944141205
chrMT	74.737	62001	63000	A12	1.40940541392929
chrMT	69.396	63001	64000	A12	1.30243526787934
chrMT	41.551	64001	65000	A12	0.562465958404244
chrMT	36.838	65001	66000	A12	0.388777497020958
chrMT	64.635	66001	67000	A12	1.19989835909359
chrMT	112.858	67001	68000	A12	2.00401954317956
chrMT	269.863	68001	69000	A12	3.26173804215461
chrMT	178.529	69001	70000	A12	2.66566929745768
chrMT	381.699	70001	71000	A12	3.76194626170312
chrMT	122.252	71001	72000	A12	2.11936892216881
chrMT	144.869	72001	73000	A12	2.36425976557217
chrMT	114.22	73001	74000	A12	2.0213261445184
chrMT	154.622	74001	75000	A12	2.45825645889199
chrMT	201.714	75001	76000	A12	2.84182207277151
chrMT	26.53	76001	77000	A12	-0.0847925645092488
chrMT	0.09	1	1000	B1	-1
chrMT	0.01	1001	2000	B1	-1
chrMT	0.01	2001	3000	B1	-1
chrMT	1.974	3001	4000	B1	-1
chrMT	0.01	4001	5000	B1	-1
chrMT	0.01	5001	6000	B1	-1
chrMT	0.01	6001	7000	B1	-1
chrMT	0.01	7001	8000	B1	-1
chrMT	0.01	8001	9000	B1	-1
chrMT	0.01	9001	10000	B1	-1
chrMT	0.01	10001	11000	B1	-1
chrMT	0.01	11001	12000	B1	-1
chrMT	0.01	12001	13000	B1	-1
chrMT	0.01	13001	14000	B1	-1
chrMT	0.01	14001	15000	B1	-1
chrMT	0.064	15001	16000	B1	-1
chrMT	0.01	16001	17000	B1	-1
chrMT	0.01	17001	18000	B1	-1
chrMT	0.01	18001	19000	B1	-1
chrMT	0.01	19001	20000	B1	-1
chrMT	0.01	20001	21000	B1	-1
chrMT	0.086	21001	22000	B1	-1
chrMT	0.01	22001	23000	B1	-1
chrMT	0.01	23001	24000	B1	-1
chrMT	0.01	24001	25000	B1	-1
chrMT	0.262	25001	26000	B1	-1
chrMT	0.01	26001	27000	B1	-1
chrMT	0.01	27001	28000	B1	-1
chrMT	0.01	28001	29000	B1	-1
chrMT	0.07	29001	30000	B1	-1
chrMT	0.232	30001	31000	B1	-1
chrMT	0.01	31001	32000	B1	-1
chrMT	0.01	32001	33000	B1	-1
chrMT	0.01	33001	34000	B1	-1
chrMT	0.01	34001	35000	B1	-1
chrMT	0.01	35001	36000	B1	-1
chrMT	0.01	36001	37000	B1	-1
chrMT	0.01	37001	38000	B1	-1
chrMT	0.01	38001	39000	B1	-1
chrMT	0.01	39001	40000	B1	-1
chrMT	0.01	40001	41000	B1	-1
chrMT	0.01	41001	42000	B1	-1
chrMT	0.01	42001	43000	B1	-1
chrMT	0.01	43001	44000	B1	-1
chrMT	0.01	44001	45000	B1	-1
chrMT	0.01	45001	46000	B1	-1
chrMT	0.01	46001	47000	B1	-1
chrMT	0.01	47001	48000	B1	-1
chrMT	0.01	48001	49000	B1	-1
chrMT	11.959	49001	50000	B1	-1
chrMT	3.626	50001	51000	B1	-1
chrMT	22.904	51001	52000	B1	-0.218427683674998
chrMT	371.691	52001	53000	B1	3.8020045914559
chrMT	34.664	53001	54000	B1	0.379410882597517
chrMT	0.707	54001	55000	B1	-1
chrMT	0.174	55001	56000	B1	-1
chrMT	0.08	56001	57000	B1	-1
chrMT	0.528	57001	58000	B1	-1
chrMT	0.01	58001	59000	B1	-1
chrMT	0.01	59001	60000	B1	-1
chrMT	0.01	60001	61000	B1	-1
chrMT	0.01	61001	62000	B1	-1
chrMT	0.01	62001	63000	B1	-1
chrMT	0.082	63001	64000	B1	-1
chrMT	0.01	64001	65000	B1	-1
chrMT	0.01	65001	66000	B1	-1
chrMT	0.058	66001	67000	B1	-1
chrMT	0.01	67001	68000	B1	-1
chrMT	0.01	68001	69000	B1	-1
chrMT	0.01	69001	70000	B1	-1
chrMT	0.01	70001	71000	B1	-1
chrMT	0.01	71001	72000	B1	-1
chrMT	0.161	72001	73000	B1	-1
chrMT	0.148	73001	74000	B1	-1
chrMT	0.01	74001	75000	B1	-1
chrMT	0.01	75001	76000	B1	-1
chrMT	0.01	76001	77000	B1	-1
chrMT	0.01	1	1000	B2	-1
chrMT	0.01	1001	2000	B2	-1
chrMT	0.01	2001	3000	B2	-1
chrMT	0.01	3001	4000	B2	-1
chrMT	0.01	4001	5000	B2	-1
chrMT	0.01	5001	6000	B2	-1
chrMT	0.01	6001	7000	B2	-1
chrMT	0.01	7001	8000	B2	-1
chrMT	0.01	8001	9000	B2	-1
chrMT	0.01	9001	10000	B2	-1
chrMT	0.2	10001	11000	B2	-1
chrMT	0.01	11001	12000	B2	-1
chrMT	0.01	12001	13000	B2	-1
chrMT	0.01	13001	14000	B2	-1
chrMT	0.01	14001	15000	B2	-1
chrMT	0.01	15001	16000	B2	-1
chrMT	0.01	16001	17000	B2	-1
chrMT	0.01	17001	18000	B2	-1
chrMT	42.865	18001	19000	B2	0.984833508410013
chrMT	0.01	19001	20000	B2	-1
chrMT	0.01	20001	21000	B2	-1
chrMT	0.01	21001	22000	B2	-1
chrMT	0.01	22001	23000	B2	-1
chrMT	0.01	23001	24000	B2	-1
chrMT	0.01	24001	25000	B2	-1
chrMT	0.01	25001	26000	B2	-1
chrMT	0.01	26001	27000	B2	-1
chrMT	0.184	27001	28000	B2	-1
chrMT	0.01	28001	29000	B2	-1
chrMT	0.01	29001	30000	B2	-1
chrMT	0.496	30001	31000	B2	-1
chrMT	0.01	31001	32000	B2	-1
chrMT	0.01	32001	33000	B2	-1
chrMT	0.01	33001	34000	B2	-1
chrMT	0.01	34001	35000	B2	-1
chrMT	0.01	35001	36000	B2	-1
chrMT	0.01	36001	37000	B2	-1
chrMT	0.01	37001	38000	B2	-1
chrMT	0.057	38001	39000	B2	-1
chrMT	0.01	39001	40000	B2	-1
chrMT	0.098	40001	41000	B2	-1
chrMT	0.01	41001	42000	B2	-1
chrMT	0.23	42001	43000	B2	-1
chrMT	0.01	43001	44000	B2	-1
chrMT	0.01	44001	45000	B2	-1
chrMT	0.01	45001	46000	B2	-1
chrMT	0.256	46001	47000	B2	-1
chrMT	0.01	47001	48000	B2	-1
chrMT	0.096	48001	49000	B2	-1
chrMT	0.01	49001	50000	B2	-1
chrMT	0.01	50001	51000	B2	-1
chrMT	0.01	51001	52000	B2	-1
chrMT	0.01	52001	53000	B2	-1
chrMT	0.01	53001	54000	B2	-1
chrMT	0.01	54001	55000	B2	-1
chrMT	0.01	55001	56000	B2	-1
chrMT	0.01	56001	57000	B2	-1
chrMT	0.01	57001	58000	B2	-1
chrMT	0.01	58001	59000	B2	-1
chrMT	0.01	59001	60000	B2	-1
chrMT	0.08	60001	61000	B2	-1
chrMT	0.01	61001	62000	B2	-1
chrMT	0.01	62001	63000	B2	-1
chrMT	0.01	63001	64000	B2	-1
chrMT	0.01	64001	65000	B2	-1
chrMT	0.01	65001	66000	B2	-1
chrMT	0.01	66001	67000	B2	-1
chrMT	0.01	67001	68000	B2	-1
chrMT	0.096	68001	69000	B2	-1
chrMT	0.146	69001	70000	B2	-1
chrMT	0.067	70001	71000	B2	-1
chrMT	0.01	71001	72000	B2	-1
chrMT	0.01	72001	73000	B2	-1
chrMT	0.01	73001	74000	B2	-1
chrMT	0.01	74001	75000	B2	-1
chrMT	0.01	75001	76000	B2	-1
chrMT	0.01	76001	77000	B2	-1
chrMT	0.01	1	1000	B3	-1
chrMT	0.01	1001	2000	B3	-1
chrMT	0.048	2001	3000	B3	-1
chrMT	0.01	3001	4000	B3	-1
chrMT	0.01	4001	5000	B3	-1
chrMT	0.01	5001	6000	B3	-1
chrMT	0.01	6001	7000	B3	-1
chrMT	0.326	7001	8000	B3	-1
chrMT	0.01	8001	9000	B3	-1
chrMT	0.125	9001	10000	B3	-1
chrMT	0.118	10001	11000	B3	-1
chrMT	0.01	11001	12000	B3	-1
chrMT	0.01	12001	13000	B3	-1
chrMT	0.01	13001	14000	B3	-1
chrMT	0.01	14001	15000	B3	-1
chrMT	0.01	15001	16000	B3	-1
chrMT	0.01	16001	17000	B3	-1
chrMT	0.062	17001	18000	B3	-1
chrMT	0.01	18001	19000	B3	-1
chrMT	0.108	19001	20000	B3	-1
chrMT	0.054	20001	21000	B3	-1
chrMT	0.01	21001	22000	B3	-1
chrMT	0.763	22001	23000	B3	-1
chrMT	0.01	23001	24000	B3	-1
chrMT	0.064	24001	25000	B3	-1
chrMT	0.133	25001	26000	B3	-1
chrMT	0.01	26001	27000	B3	-1
chrMT	0.184	27001	28000	B3	-1
chrMT	0.01	28001	29000	B3	-1
chrMT	0.01	29001	30000	B3	-1
chrMT	0.188	30001	31000	B3	-1
chrMT	0.01	31001	32000	B3	-1
chrMT	0.929	32001	33000	B3	-1
chrMT	0.01	33001	34000	B3	-1
chrMT	0.01	34001	35000	B3	-1
chrMT	0.084	35001	36000	B3	-1
chrMT	0.01	36001	37000	B3	-1
chrMT	0.01	37001	38000	B3	-1
chrMT	0.01	38001	39000	B3	-1
chrMT	0.056	39001	40000	B3	-1
chrMT	0.124	40001	41000	B3	-1
chrMT	0.01	41001	42000	B3	-1
chrMT	0.01	42001	43000	B3	-1
chrMT	0.01	43001	44000	B3	-1
chrMT	0.01	44001	45000	B3	-1
chrMT	0.01	45001	46000	B3	-1
chrMT	0.064	46001	47000	B3	-1
chrMT	0.01	47001	48000	B3	-1
chrMT	0.164	48001	49000	B3	-1
chrMT	0.01	49001	50000	B3	-1
chrMT	0.01	50001	51000	B3	-1
chrMT	10.052	51001	52000	B3	-0.911666786956468
chrMT	0.01	52001	53000	B3	-1
chrMT	0.01	53001	54000	B3	-1
chrMT	0.64	54001	55000	B3	-1
chrMT	0.034	55001	56000	B3	-1
chrMT	0.01	56001	57000	B3	-1
chrMT	0.01	57001	58000	B3	-1
chrMT	0.01	58001	59000	B3	-1
chrMT	0.01	59001	60000	B3	-1
chrMT	0.093	60001	61000	B3	-1
chrMT	0.778	61001	62000	B3	-1
chrMT	0.01	62001	63000	B3	-1
chrMT	0.138	63001	64000	B3	-1
chrMT	0.1	64001	65000	B3	-1
chrMT	0.01	65001	66000	B3	-1
chrMT	0.296	66001	67000	B3	-1
chrMT	0.01	67001	68000	B3	-1
chrMT	0.01	68001	69000	B3	-1
chrMT	0.01	69001	70000	B3	-1
chrMT	0.166	70001	71000	B3	-1
chrMT	0.183	71001	72000	B3	-1
chrMT	0.01	72001	73000	B3	-1
chrMT	0.112	73001	74000	B3	-1
chrMT	0.01	74001	75000	B3	-1
chrMT	0.01	75001	76000	B3	-1
chrMT	0.01	76001	77000	B3	-1
chrMT	0.01	1	1000	B4	-1
chrMT	0.01	1001	2000	B4	-1
chrMT	0.01	2001	3000	B4	-1
chrMT	8.102	3001	4000	B4	-1
chrMT	0.174	4001	5000	B4	-1
chrMT	0.01	5001	6000	B4	-1
chrMT	0.01	6001	7000	B4	-1
chrMT	0.01	7001	8000	B4	-1
chrMT	0.01	8001	9000	B4	-1
chrMT	0.01	9001	10000	B4	-1
chrMT	0.01	10001	11000	B4	-1
chrMT	0.01	11001	12000	B4	-1
chrMT	0.01	12001	13000	B4	-1
chrMT	0.01	13001	14000	B4	-1
chrMT	0.081	14001	15000	B4	-1
chrMT	7.884	15001	16000	B4	-1
chrMT	0.098	16001	17000	B4	-1
chrMT	0.496	17001	18000	B4	-1
chrMT	33.595	18001	19000	B4	0.27217596951561
chrMT	151.427	19001	20000	B4	2.44448000031319
chrMT	72.259	20001	21000	B4	1.37710672854704
chrMT	126.347	21001	22000	B4	2.18324894328239
chrMT	103.155	22001	23000	B4	1.8906712855631
chrMT	69.169	23001	24000	B4	1.31405503828407
chrMT	283.595	24001	25000	B4	3.34968963110442
chrMT	296.637	25001	26000	B4	3.41455609277611
chrMT	313.057	26001	27000	B4	3.49228289458655
chrMT	303.931	27001	28000	B4	3.44960136682919
chrMT	0.01	28001	29000	B4	-1
chrMT	0.01	29001	30000	B4	-1
chrMT	0.01	30001	31000	B4	-1
chrMT	0.053	31001	32000	B4	-1
chrMT	0.064	32001	33000	B4	-1
chrMT	0.01	33001	34000	B4	-1
chrMT	0.01	34001	35000	B4	-1
chrMT	0.043	35001	36000	B4	-1
chrMT	0.01	36001	37000	B4	-1
chrMT	0.01	37001	38000	B4	-1
chrMT	0.104	38001	39000	B4	-1
chrMT	0.01	39001	40000	B4	-1
chrMT	0.078	40001	41000	B4	-1
chrMT	0.01	41001	42000	B4	-1
chrMT	0.078	42001	43000	B4	-1
chrMT	0.01	43001	44000	B4	-1
chrMT	0.01	44001	45000	B4	-1
chrMT	0.074	45001	46000	B4	-1
chrMT	0.01	46001	47000	B4	-1
chrMT	0.01	47001	48000	B4	-1
chrMT	0.01	48001	49000	B4	-1
chrMT	0.116	49001	50000	B4	-1
chrMT	277.355	50001	51000	B4	3.31759126792903
chrMT	227.312	51001	52000	B4	3.03053138143993
chrMT	162.669	52001	53000	B4	2.54779687545094
chrMT	100.858	53001	54000	B4	1.8581830563874
chrMT	136.944	54001	55000	B4	2.29944359200234
chrMT	96.29	55001	56000	B4	1.79131541696953
chrMT	4.134	56001	57000	B4	-1
chrMT	1.904	57001	58000	B4	-1
chrMT	0.01	58001	59000	B4	-1
chrMT	0.101	59001	60000	B4	-1
chrMT	0.307	60001	61000	B4	-1
chrMT	0.061	61001	62000	B4	-1
chrMT	0.01	62001	63000	B4	-1
chrMT	0.262	63001	64000	B4	-1
chrMT	0.162	64001	65000	B4	-1
chrMT	0.164	65001	66000	B4	-1
chrMT	3.156	66001	67000	B4	-1
chrMT	0.01	67001	68000	B4	-1
chrMT	0.01	68001	69000	B4	-1
chrMT	0.13	69001	70000	B4	-1
chrMT	0.01	70001	71000	B4	-1
chrMT	0.01	71001	72000	B4	-1
chrMT	0.01	72001	73000	B4	-1
chrMT	0.1	73001	74000	B4	-1
chrMT	0.01	74001	75000	B4	-1
chrMT	0.01	75001	76000	B4	-1
chrMT	0.01	76001	77000	B4	-1
chrMT	0.084	1	1000	B5	-1
chrMT	0.01	1001	2000	B5	-1
chrMT	0.01	2001	3000	B5	-1
chrMT	0.01	3001	4000	B5	-1
chrMT	0.066	4001	5000	B5	-1
chrMT	0.01	5001	6000	B5	-1
chrMT	0.01	6001	7000	B5	-1
chrMT	0.108	7001	8000	B5	-1
chrMT	0.01	8001	9000	B5	-1
chrMT	0.01	9001	10000	B5	-1
chrMT	0.01	10001	11000	B5	-1
chrMT	0.01	11001	12000	B5	-1
chrMT	0.01	12001	13000	B5	-1
chrMT	0.01	13001	14000	B5	-1
chrMT	0.01	14001	15000	B5	-1
chrMT	0.01	15001	16000	B5	-1
chrMT	0.01	16001	17000	B5	-1
chrMT	0.168	17001	18000	B5	-1
chrMT	0.01	18001	19000	B5	-1
chrMT	0.01	19001	20000	B5	-1
chrMT	0.01	20001	21000	B5	-1
chrMT	0.01	21001	22000	B5	-1
chrMT	0.01	22001	23000	B5	-1
chrMT	0.01	23001	24000	B5	-1
chrMT	0.064	24001	25000	B5	-1
chrMT	0.01	25001	26000	B5	-1
chrMT	0.01	26001	27000	B5	-1
chrMT	0.01	27001	28000	B5	-1
chrMT	0.01	28001	29000	B5	-1
chrMT	0.01	29001	30000	B5	-1
chrMT	0.01	30001	31000	B5	-1
chrMT	0.083	31001	32000	B5	-1
chrMT	0.01	32001	33000	B5	-1
chrMT	0.01	33001	34000	B5	-1
chrMT	0.01	34001	35000	B5	-1
chrMT	0.01	35001	36000	B5	-1
chrMT	0.01	36001	37000	B5	-1
chrMT	0.01	37001	38000	B5	-1
chrMT	0.01	38001	39000	B5	-1
chrMT	0.01	39001	40000	B5	-1
chrMT	0.01	40001	41000	B5	-1
chrMT	0.01	41001	42000	B5	-1
chrMT	0.01	42001	43000	B5	-1
chrMT	0.01	43001	44000	B5	-1
chrMT	0.01	44001	45000	B5	-1
chrMT	0.01	45001	46000	B5	-1
chrMT	0.01	46001	47000	B5	-1
chrMT	0.01	47001	48000	B5	-1
chrMT	0.01	48001	49000	B5	-1
chrMT	0.01	49001	50000	B5	-1
chrMT	0.01	50001	51000	B5	-1
chrMT	0.01	51001	52000	B5	-1
chrMT	0.01	52001	53000	B5	-1
chrMT	445.29	53001	54000	B5	4.04205842330193
chrMT	415.883	54001	55000	B5	3.94349092347235
chrMT	0.01	55001	56000	B5	-1
chrMT	0.01	56001	57000	B5	-1
chrMT	0.01	57001	58000	B5	-1
chrMT	0.01	58001	59000	B5	-1
chrMT	0.01	59001	60000	B5	-1
chrMT	0.01	60001	61000	B5	-1
chrMT	0.01	61001	62000	B5	-1
chrMT	0.01	62001	63000	B5	-1
chrMT	3.67	63001	64000	B5	-1
chrMT	2.01	64001	65000	B5	-1
chrMT	0.182	65001	66000	B5	-1
chrMT	0.01	66001	67000	B5	-1
chrMT	0.01	67001	68000	B5	-1
chrMT	0.01	68001	69000	B5	-1
chrMT	0.198	69001	70000	B5	-1
chrMT	0.01	70001	71000	B5	-1
chrMT	0.01	71001	72000	B5	-1
chrMT	0.01	72001	73000	B5	-1
chrMT	0.01	73001	74000	B5	-1
chrMT	0.01	74001	75000	B5	-1
chrMT	0.01	75001	76000	B5	-1
chrMT	0.01	76001	77000	B5	-1
chrMT	0.01	1	1000	B6	-1
chrMT	0.01	1001	2000	B6	-1
chrMT	0.01	2001	3000	B6	-1
chrMT	7.606	3001	4000	B6	-1
chrMT	0.126	4001	5000	B6	-1
chrMT	0.01	5001	6000	B6	-1
chrMT	0.01	6001	7000	B6	-1
chrMT	0.01	7001	8000	B6	-1
chrMT	0.01	8001	9000	B6	-1
chrMT	0.01	9001	10000	B6	-1
chrMT	0.01	10001	11000	B6	-1
chrMT	0.01	11001	12000	B6	-1
chrMT	0.01	12001	13000	B6	-1
chrMT	0.12	13001	14000	B6	-1
chrMT	0.01	14001	15000	B6	-1
chrMT	0.186	15001	16000	B6	-1
chrMT	1.282	16001	17000	B6	-1
chrMT	0.472	17001	18000	B6	-1
chrMT	0.01	18001	19000	B6	-1
chrMT	0.01	19001	20000	B6	-1
chrMT	0.01	20001	21000	B6	-1
chrMT	0.216	21001	22000	B6	-1
chrMT	0.01	22001	23000	B6	-1
chrMT	0.01	23001	24000	B6	-1
chrMT	0.256	24001	25000	B6	-1
chrMT	0.545	25001	26000	B6	-1
chrMT	0.01	26001	27000	B6	-1
chrMT	0.074	27001	28000	B6	-1
chrMT	0.01	28001	29000	B6	-1
chrMT	0.01	29001	30000	B6	-1
chrMT	0.01	30001	31000	B6	-1
chrMT	0.111	31001	32000	B6	-1
chrMT	0.01	32001	33000	B6	-1
chrMT	0.01	33001	34000	B6	-1
chrMT	0.01	34001	35000	B6	-1
chrMT	0.01	35001	36000	B6	-1
chrMT	0.01	36001	37000	B6	-1
chrMT	0.01	37001	38000	B6	-1
chrMT	18.589	38001	39000	B6	-0.615246679736523
chrMT	45.213	39001	40000	B6	0.667041805463157
chrMT	42.378	40001	41000	B6	0.573619660402281
chrMT	36.194	41001	42000	B6	0.346054714831259
chrMT	79.271	42001	43000	B6	1.4770973341074
chrMT	103.546	43001	44000	B6	1.86250407602833
chrMT	56.122	44001	45000	B6	0.978870580756933
chrMT	63.336	45001	46000	B6	1.15332991456459
chrMT	54.9	46001	47000	B6	0.947110307297087
chrMT	41.449	47001	48000	B6	0.541641453697313
chrMT	205.141	48001	49000	B6	2.84884811427588
chrMT	45.711	49001	50000	B6	0.682845538576274
chrMT	60.666	50001	51000	B6	1.09119234877802
chrMT	57.808	51001	52000	B6	1.02157331794961
chrMT	25.513	52001	53000	B6	-0.158463290674336
chrMT	25.115	53001	54000	B6	-0.181146566923645
chrMT	46.199	54001	55000	B6	0.698165782204597
chrMT	36.752	55001	56000	B6	0.368126919895087
chrMT	27.284	56001	57000	B6	-0.0616406742161996
chrMT	51.457	57001	58000	B6	0.853671506873921
chrMT	36.652	58001	59000	B6	0.364196082520008
chrMT	27.05	59001	60000	B6	-0.0740672478812965
chrMT	136.113	60001	61000	B6	2.25703711656199
chrMT	103.871	61001	62000	B6	1.86702517383622
chrMT	0.01	62001	63000	B6	-1
chrMT	0.088	63001	64000	B6	-1
chrMT	0.12	64001	65000	B6	-1
chrMT	0.064	65001	66000	B6	-1
chrMT	0.236	66001	67000	B6	-1
chrMT	0.01	67001	68000	B6	-1
chrMT	0.01	68001	69000	B6	-1
chrMT	0.092	69001	70000	B6	-1
chrMT	0.01	70001	71000	B6	-1
chrMT	0.01	71001	72000	B6	-1
chrMT	0.01	72001	73000	B6	-1
chrMT	0.01	73001	74000	B6	-1
chrMT	0.01	74001	75000	B6	-1
chrMT	0.01	75001	76000	B6	-1
chrMT	0.01	76001	77000	B6	-1
chrMT	0.01	1	1000	B7	-1
chrMT	0.01	1001	2000	B7	-1
chrMT	0.01	2001	3000	B7	-1
chrMT	2.582	3001	4000	B7	-1
chrMT	0.176	4001	5000	B7	-1
chrMT	0.35	5001	6000	B7	-1
chrMT	0.01	6001	7000	B7	-1
chrMT	0.126	7001	8000	B7	-1
chrMT	0.01	8001	9000	B7	-1
chrMT	0.124	9001	10000	B7	-1
chrMT	0.01	10001	11000	B7	-1
chrMT	0.12	11001	12000	B7	-1
chrMT	0.096	12001	13000	B7	-1
chrMT	0.01	13001	14000	B7	-1
chrMT	0.01	14001	15000	B7	-1
chrMT	0.074	15001	16000	B7	-1
chrMT	1.646	16001	17000	B7	-1
chrMT	1.153	17001	18000	B7	-1
chrMT	0.056	18001	19000	B7	-1
chrMT	0.152	19001	20000	B7	-1
chrMT	0.01	20001	21000	B7	-1
chrMT	0.01	21001	22000	B7	-1
chrMT	0.01	22001	23000	B7	-1
chrMT	0.01	23001	24000	B7	-1
chrMT	0.01	24001	25000	B7	-1
chrMT	0.01	25001	26000	B7	-1
chrMT	0.01	26001	27000	B7	-1
chrMT	0.086	27001	28000	B7	-1
chrMT	0.01	28001	29000	B7	-1
chrMT	0.01	29001	30000	B7	-1
chrMT	0.26	30001	31000	B7	-1
chrMT	0.01	31001	32000	B7	-1
chrMT	0.01	32001	33000	B7	-1
chrMT	0.01	33001	34000	B7	-1
chrMT	0.01	34001	35000	B7	-1
chrMT	0.01	35001	36000	B7	-1
chrMT	0.212	36001	37000	B7	-1
chrMT	0.01	37001	38000	B7	-1
chrMT	0.224	38001	39000	B7	-1
chrMT	0.056	39001	40000	B7	-1
chrMT	0.01	40001	41000	B7	-1
chrMT	0.01	41001	42000	B7	-1
chrMT	0.01	42001	43000	B7	-1
chrMT	0.01	43001	44000	B7	-1
chrMT	0.01	44001	45000	B7	-1
chrMT	0.84	45001	46000	B7	-1
chrMT	0.194	46001	47000	B7	-1
chrMT	0.01	47001	48000	B7	-1
chrMT	0.108	48001	49000	B7	-1
chrMT	0.01	49001	50000	B7	-1
chrMT	0.152	50001	51000	B7	-1
chrMT	2.942	51001	52000	B7	-1
chrMT	0.09	52001	53000	B7	-1
chrMT	0.162	53001	54000	B7	-1
chrMT	0.372	54001	55000	B7	-1
chrMT	0.144	55001	56000	B7	-1
chrMT	0.263	56001	57000	B7	-1
chrMT	290.859	57001	58000	B7	3.88515132831141
chrMT	193.511	58001	59000	B7	3.29724696010062
chrMT	157.46	59001	60000	B7	2.99981676572772
chrMT	700.818	60001	61000	B7	5.15387121237693
chrMT	528.823	61001	62000	B7	4.74761630746661
chrMT	288.985	62001	63000	B7	3.87582599280759
chrMT	301.68	63001	64000	B7	3.93785043798262
chrMT	183.896	64001	65000	B7	3.22372148180897
chrMT	0.369	65001	66000	B7	-1
chrMT	0.01	66001	67000	B7	-1
chrMT	0.01	67001	68000	B7	-1
chrMT	0.01	68001	69000	B7	-1
chrMT	0.01	69001	70000	B7	-1
chrMT	0.01	70001	71000	B7	-1
chrMT	0.01	71001	72000	B7	-1
chrMT	0.188	72001	73000	B7	-1
chrMT	0.084	73001	74000	B7	-1
chrMT	0.01	74001	75000	B7	-1
chrMT	0.01	75001	76000	B7	-1
chrMT	0.01	76001	77000	B7	-1
chrMT	0.01	1	1000	B8	-1
chrMT	0.01	1001	2000	B8	-1
chrMT	0.01	2001	3000	B8	-1
chrMT	2.91	3001	4000	B8	-1
chrMT	0.01	4001	5000	B8	-1
chrMT	0.01	5001	6000	B8	-1
chrMT	0.01	6001	7000	B8	-1
chrMT	0.01	7001	8000	B8	-1
chrMT	0.01	8001	9000	B8	-1
chrMT	0.01	9001	10000	B8	-1
chrMT	0.01	10001	11000	B8	-1
chrMT	0.262	11001	12000	B8	-1
chrMT	0.01	12001	13000	B8	-1
chrMT	0.096	13001	14000	B8	-1
chrMT	0.01	14001	15000	B8	-1
chrMT	0.01	15001	16000	B8	-1
chrMT	0.01	16001	17000	B8	-1
chrMT	0.01	17001	18000	B8	-1
chrMT	0.01	18001	19000	B8	-1
chrMT	0.01	19001	20000	B8	-1
chrMT	0.01	20001	21000	B8	-1
chrMT	0.01	21001	22000	B8	-1
chrMT	0.01	22001	23000	B8	-1
chrMT	0.01	23001	24000	B8	-1
chrMT	0.01	24001	25000	B8	-1
chrMT	0.01	25001	26000	B8	-1
chrMT	0.01	26001	27000	B8	-1
chrMT	0.055	27001	28000	B8	-1
chrMT	0.01	28001	29000	B8	-1
chrMT	0.01	29001	30000	B8	-1
chrMT	0.01	30001	31000	B8	-1
chrMT	0.01	31001	32000	B8	-1
chrMT	0.01	32001	33000	B8	-1
chrMT	0.01	33001	34000	B8	-1
chrMT	0.01	34001	35000	B8	-1
chrMT	0.01	35001	36000	B8	-1
chrMT	0.01	36001	37000	B8	-1
chrMT	0.01	37001	38000	B8	-1
chrMT	0.01	38001	39000	B8	-1
chrMT	0.01	39001	40000	B8	-1
chrMT	0.01	40001	41000	B8	-1
chrMT	0.01	41001	42000	B8	-1
chrMT	0.01	42001	43000	B8	-1
chrMT	0.01	43001	44000	B8	-1
chrMT	0.135	44001	45000	B8	-1
chrMT	0.01	45001	46000	B8	-1
chrMT	0.122	46001	47000	B8	-1
chrMT	0.01	47001	48000	B8	-1
chrMT	0.136	48001	49000	B8	-1
chrMT	0.01	49001	50000	B8	-1
chrMT	4.633	50001	51000	B8	-1
chrMT	14.312	51001	52000	B8	-1
chrMT	0.01	52001	53000	B8	-1
chrMT	0.01	53001	54000	B8	-1
chrMT	0.01	54001	55000	B8	-1
chrMT	0.01	55001	56000	B8	-1
chrMT	0.01	56001	57000	B8	-1
chrMT	0.7	57001	58000	B8	-1
chrMT	0.01	58001	59000	B8	-1
chrMT	0.01	59001	60000	B8	-1
chrMT	0.01	60001	61000	B8	-1
chrMT	0.202	61001	62000	B8	-1
chrMT	0.01	62001	63000	B8	-1
chrMT	0.01	63001	64000	B8	-1
chrMT	0.01	64001	65000	B8	-1
chrMT	0.01	65001	66000	B8	-1
chrMT	0.01	66001	67000	B8	-1
chrMT	0.01	67001	68000	B8	-1
chrMT	0.01	68001	69000	B8	-1
chrMT	0.01	69001	70000	B8	-1
chrMT	0.01	70001	71000	B8	-1
chrMT	0.056	71001	72000	B8	-1
chrMT	0.026	72001	73000	B8	-1
chrMT	0.01	73001	74000	B8	-1
chrMT	0.01	74001	75000	B8	-1
chrMT	0.262	75001	76000	B8	-1
chrMT	0.048	76001	77000	B8	-1
chrMT	17.447	1	1000	B9	-0.522464995834364
chrMT	6.575	1001	2000	B9	-1
chrMT	5.81	2001	3000	B9	-1
chrMT	12.487	3001	4000	B9	-1
chrMT	33.97	4001	5000	B9	0.438817235071433
chrMT	20.31	5001	6000	B9	-0.303253743511615
chrMT	4.76	6001	7000	B9	-1
chrMT	0.01	7001	8000	B9	-1
chrMT	0.098	8001	9000	B9	-1
chrMT	0.01	9001	10000	B9	-1
chrMT	0.01	10001	11000	B9	-1
chrMT	0.01	11001	12000	B9	-1
chrMT	0.01	12001	13000	B9	-1
chrMT	0.01	13001	14000	B9	-1
chrMT	0.01	14001	15000	B9	-1
chrMT	0.222	15001	16000	B9	-1
chrMT	1.09	16001	17000	B9	-1
chrMT	1.14	17001	18000	B9	-1
chrMT	0.102	18001	19000	B9	-1
chrMT	0.01	19001	20000	B9	-1
chrMT	0.01	20001	21000	B9	-1
chrMT	0.01	21001	22000	B9	-1
chrMT	0.07	22001	23000	B9	-1
chrMT	0.08	23001	24000	B9	-1
chrMT	0.094	24001	25000	B9	-1
chrMT	0.572	25001	26000	B9	-1
chrMT	0.01	26001	27000	B9	-1
chrMT	0.719	27001	28000	B9	-1
chrMT	0.01	28001	29000	B9	-1
chrMT	0.01	29001	30000	B9	-1
chrMT	0.01	30001	31000	B9	-1
chrMT	0.014	31001	32000	B9	-1
chrMT	0.046	32001	33000	B9	-1
chrMT	0.01	33001	34000	B9	-1
chrMT	0.01	34001	35000	B9	-1
chrMT	0.01	35001	36000	B9	-1
chrMT	0.01	36001	37000	B9	-1
chrMT	0.01	37001	38000	B9	-1
chrMT	0.248	38001	39000	B9	-1
chrMT	0.01	39001	40000	B9	-1
chrMT	0.01	40001	41000	B9	-1
chrMT	0.01	41001	42000	B9	-1
chrMT	0.01	42001	43000	B9	-1
chrMT	0.01	43001	44000	B9	-1
chrMT	0.01	44001	45000	B9	-1
chrMT	0.196	45001	46000	B9	-1
chrMT	0.043	46001	47000	B9	-1
chrMT	0.01	47001	48000	B9	-1
chrMT	0.01	48001	49000	B9	-1
chrMT	0.01	49001	50000	B9	-1
chrMT	148.731	50001	51000	B9	2.56918949137868
chrMT	154.645	51001	52000	B9	2.62544430054024
chrMT	92.155	52001	53000	B9	1.8786184602959
chrMT	100.268	53001	54000	B9	2.000345362683
chrMT	142.548	54001	55000	B9	2.50793190962629
chrMT	115.216	55001	56000	B9	2.20082518891955
chrMT	104.878	56001	57000	B9	2.06519619080459
chrMT	172.389	57001	58000	B9	2.78215183192418
chrMT	104.055	58001	59000	B9	2.05383040215748
chrMT	88.559	59001	60000	B9	1.8211949482874
chrMT	495.9	60001	61000	B9	4.30653333709306
chrMT	324.088	61001	62000	B9	3.69286971474548
chrMT	107.835	62001	63000	B9	2.10530962128919
chrMT	62.988	63001	64000	B9	1.3296330202368
chrMT	16.841	64001	65000	B9	-0.573466176558045
chrMT	3.76	65001	66000	B9	-1
chrMT	3.78	66001	67000	B9	-1
chrMT	5.536	67001	68000	B9	-1
chrMT	10.675	68001	69000	B9	-1
chrMT	10.249	69001	70000	B9	-1
chrMT	20.864	70001	71000	B9	-0.264428208464053
chrMT	6.262	71001	72000	B9	-1
chrMT	7.703	72001	73000	B9	-1
chrMT	5.869	73001	74000	B9	-1
chrMT	7.11	74001	75000	B9	-1
chrMT	10.529	75001	76000	B9	-1
chrMT	1.362	76001	77000	B9	-1
chrMT	0.01	1	1000	B10	-1
chrMT	0.01	1001	2000	B10	-1
chrMT	0.01	2001	3000	B10	-1
chrMT	0.01	3001	4000	B10	-1
chrMT	0.13	4001	5000	B10	-1
chrMT	0.01	5001	6000	B10	-1
chrMT	0.01	6001	7000	B10	-1
chrMT	0.1	7001	8000	B10	-1
chrMT	0.01	8001	9000	B10	-1
chrMT	0.01	9001	10000	B10	-1
chrMT	0.01	10001	11000	B10	-1
chrMT	0.044	11001	12000	B10	-1
chrMT	0.01	12001	13000	B10	-1
chrMT	0.096	13001	14000	B10	-1
chrMT	0.01	14001	15000	B10	-1
chrMT	0.01	15001	16000	B10	-1
chrMT	0.01	16001	17000	B10	-1
chrMT	0.01	17001	18000	B10	-1
chrMT	0.01	18001	19000	B10	-1
chrMT	0.01	19001	20000	B10	-1
chrMT	0.01	20001	21000	B10	-1
chrMT	0.01	21001	22000	B10	-1
chrMT	0.01	22001	23000	B10	-1
chrMT	0.01	23001	24000	B10	-1
chrMT	0.094	24001	25000	B10	-1
chrMT	0.166	25001	26000	B10	-1
chrMT	0.01	26001	27000	B10	-1
chrMT	0.01	27001	28000	B10	-1
chrMT	0.01	28001	29000	B10	-1
chrMT	0.058	29001	30000	B10	-1
chrMT	0.216	30001	31000	B10	-1
chrMT	0.01	31001	32000	B10	-1
chrMT	0.01	32001	33000	B10	-1
chrMT	0.01	33001	34000	B10	-1
chrMT	0.01	34001	35000	B10	-1
chrMT	0.074	35001	36000	B10	-1
chrMT	0.01	36001	37000	B10	-1
chrMT	0.01	37001	38000	B10	-1
chrMT	0.01	38001	39000	B10	-1
chrMT	0.01	39001	40000	B10	-1
chrMT	0.01	40001	41000	B10	-1
chrMT	0.01	41001	42000	B10	-1
chrMT	0.01	42001	43000	B10	-1
chrMT	0.01	43001	44000	B10	-1
chrMT	0.01	44001	45000	B10	-1
chrMT	0.01	45001	46000	B10	-1
chrMT	0.01	46001	47000	B10	-1
chrMT	0.081	47001	48000	B10	-1
chrMT	0.01	48001	49000	B10	-1
chrMT	0.01	49001	50000	B10	-1
chrMT	0.01	50001	51000	B10	-1
chrMT	0.078	51001	52000	B10	-1
chrMT	0.01	52001	53000	B10	-1
chrMT	0.01	53001	54000	B10	-1
chrMT	0.154	54001	55000	B10	-1
chrMT	0.01	55001	56000	B10	-1
chrMT	48.972	56001	57000	B10	0.994589593212148
chrMT	0.01	57001	58000	B10	-1
chrMT	0.01	58001	59000	B10	-1
chrMT	0.01	59001	60000	B10	-1
chrMT	0.01	60001	61000	B10	-1
chrMT	0.01	61001	62000	B10	-1
chrMT	0.16	62001	63000	B10	-1
chrMT	0.01	63001	64000	B10	-1
chrMT	0.01	64001	65000	B10	-1
chrMT	0.01	65001	66000	B10	-1
chrMT	0.128	66001	67000	B10	-1
chrMT	0.01	67001	68000	B10	-1
chrMT	0.01	68001	69000	B10	-1
chrMT	0.01	69001	70000	B10	-1
chrMT	0.01	70001	71000	B10	-1
chrMT	0.01	71001	72000	B10	-1
chrMT	0.01	72001	73000	B10	-1
chrMT	0.01	73001	74000	B10	-1
chrMT	0.01	74001	75000	B10	-1
chrMT	0.01	75001	76000	B10	-1
chrMT	0.01	76001	77000	B10	-1
chrMT	0.01	1	1000	B11	-1
chrMT	0.01	1001	2000	B11	-1
chrMT	0.01	2001	3000	B11	-1
chrMT	3.245	3001	4000	B11	-1
chrMT	0.01	4001	5000	B11	-1
chrMT	0.01	5001	6000	B11	-1
chrMT	0.01	6001	7000	B11	-1
chrMT	0.094	7001	8000	B11	-1
chrMT	0.01	8001	9000	B11	-1
chrMT	0.01	9001	10000	B11	-1
chrMT	0.01	10001	11000	B11	-1
chrMT	0.132	11001	12000	B11	-1
chrMT	0.01	12001	13000	B11	-1
chrMT	0.098	13001	14000	B11	-1
chrMT	0.01	14001	15000	B11	-1
chrMT	0.01	15001	16000	B11	-1
chrMT	1.13	16001	17000	B11	-1
chrMT	0.01	17001	18000	B11	-1
chrMT	0.01	18001	19000	B11	-1
chrMT	0.01	19001	20000	B11	-1
chrMT	0.01	20001	21000	B11	-1
chrMT	0.01	21001	22000	B11	-1
chrMT	0.01	22001	23000	B11	-1
chrMT	0.01	23001	24000	B11	-1
chrMT	0.01	24001	25000	B11	-1
chrMT	0.332	25001	26000	B11	-1
chrMT	0.01	26001	27000	B11	-1
chrMT	0.238	27001	28000	B11	-1
chrMT	0.01	28001	29000	B11	-1
chrMT	0.01	29001	30000	B11	-1
chrMT	0.01	30001	31000	B11	-1
chrMT	0.01	31001	32000	B11	-1
chrMT	0.01	32001	33000	B11	-1
chrMT	0.01	33001	34000	B11	-1
chrMT	0.01	34001	35000	B11	-1
chrMT	0.01	35001	36000	B11	-1
chrMT	0.01	36001	37000	B11	-1
chrMT	0.01	37001	38000	B11	-1
chrMT	0.01	38001	39000	B11	-1
chrMT	0.01	39001	40000	B11	-1
chrMT	0.01	40001	41000	B11	-1
chrMT	0.01	41001	42000	B11	-1
chrMT	0.01	42001	43000	B11	-1
chrMT	0.01	43001	44000	B11	-1
chrMT	0.01	44001	45000	B11	-1
chrMT	0.01	45001	46000	B11	-1
chrMT	0.01	46001	47000	B11	-1
chrMT	0.01	47001	48000	B11	-1
chrMT	0.01	48001	49000	B11	-1
chrMT	0.01	49001	50000	B11	-1
chrMT	0.01	50001	51000	B11	-1
chrMT	3.038	51001	52000	B11	-1
chrMT	0.01	52001	53000	B11	-1
chrMT	0.01	53001	54000	B11	-1
chrMT	0.01	54001	55000	B11	-1
chrMT	0.01	55001	56000	B11	-1
chrMT	0.01	56001	57000	B11	-1
chrMT	94.062	57001	58000	B11	1.58358276740083
chrMT	8.304	58001	59000	B11	-1
chrMT	0.01	59001	60000	B11	-1
chrMT	0.01	60001	61000	B11	-1
chrMT	0.01	61001	62000	B11	-1
chrMT	0.136	62001	63000	B11	-1
chrMT	0.01	63001	64000	B11	-1
chrMT	0.01	64001	65000	B11	-1
chrMT	0.01	65001	66000	B11	-1
chrMT	0.01	66001	67000	B11	-1
chrMT	0.01	67001	68000	B11	-1
chrMT	0.01	68001	69000	B11	-1
chrMT	0.01	69001	70000	B11	-1
chrMT	0.01	70001	71000	B11	-1
chrMT	0.01	71001	72000	B11	-1
chrMT	0.01	72001	73000	B11	-1
chrMT	0.048	73001	74000	B11	-1
chrMT	0.01	74001	75000	B11	-1
chrMT	0.01	75001	76000	B11	-1
chrMT	0.01	76001	77000	B11	-1
chrMT	0.01	1	1000	B12	-1
chrMT	0.01	1001	2000	B12	-1
chrMT	0.01	2001	3000	B12	-1
chrMT	0.01	3001	4000	B12	-1
chrMT	0.074	4001	5000	B12	-1
chrMT	0.056	5001	6000	B12	-1
chrMT	0.01	6001	7000	B12	-1
chrMT	0.1	7001	8000	B12	-1
chrMT	0.01	8001	9000	B12	-1
chrMT	0.01	9001	10000	B12	-1
chrMT	0.082	10001	11000	B12	-1
chrMT	0.09	11001	12000	B12	-1
chrMT	0.01	12001	13000	B12	-1
chrMT	0.01	13001	14000	B12	-1
chrMT	0.01	14001	15000	B12	-1
chrMT	8.044	15001	16000	B12	-1
chrMT	0.025	16001	17000	B12	-1
chrMT	0.101	17001	18000	B12	-1
chrMT	0.01	18001	19000	B12	-1
chrMT	0.01	19001	20000	B12	-1
chrMT	0.01	20001	21000	B12	-1
chrMT	0.01	21001	22000	B12	-1
chrMT	0.01	22001	23000	B12	-1
chrMT	0.01	23001	24000	B12	-1
chrMT	0.138	24001	25000	B12	-1
chrMT	681.327	25001	26000	B12	4.59734556802874
chrMT	58.012	26001	27000	B12	1.0434214513278
chrMT	163.746	27001	28000	B12	2.54045785303375
chrMT	0.16	28001	29000	B12	-1
chrMT	0.01	29001	30000	B12	-1
chrMT	0.01	30001	31000	B12	-1
chrMT	0.01	31001	32000	B12	-1
chrMT	0.01	32001	33000	B12	-1
chrMT	0.01	33001	34000	B12	-1
chrMT	0.01	34001	35000	B12	-1
chrMT	0.162	35001	36000	B12	-1
chrMT	0.01	36001	37000	B12	-1
chrMT	0.01	37001	38000	B12	-1
chrMT	0.15	38001	39000	B12	-1
chrMT	0.01	39001	40000	B12	-1
chrMT	0.01	40001	41000	B12	-1
chrMT	0.01	41001	42000	B12	-1
chrMT	0.01	42001	43000	B12	-1
chrMT	0.01	43001	44000	B12	-1
chrMT	0.01	44001	45000	B12	-1
chrMT	0.01	45001	46000	B12	-1
chrMT	0.01	46001	47000	B12	-1
chrMT	0.01	47001	48000	B12	-1
chrMT	0.01	48001	49000	B12	-1
chrMT	0.01	49001	50000	B12	-1
chrMT	0.01	50001	51000	B12	-1
chrMT	0.088	51001	52000	B12	-1
chrMT	0.01	52001	53000	B12	-1
chrMT	0.01	53001	54000	B12	-1
chrMT	0.01	54001	55000	B12	-1
chrMT	0.01	55001	56000	B12	-1
chrMT	0.01	56001	57000	B12	-1
chrMT	0.118	57001	58000	B12	-1
chrMT	0.01	58001	59000	B12	-1
chrMT	0.01	59001	60000	B12	-1
chrMT	0.01	60001	61000	B12	-1
chrMT	0.126	61001	62000	B12	-1
chrMT	0.063	62001	63000	B12	-1
chrMT	0.01	63001	64000	B12	-1
chrMT	0.01	64001	65000	B12	-1
chrMT	0.01	65001	66000	B12	-1
chrMT	3.721	66001	67000	B12	-1
chrMT	0.01	67001	68000	B12	-1
chrMT	0.01	68001	69000	B12	-1
chrMT	0.01	69001	70000	B12	-1
chrMT	0.01	70001	71000	B12	-1
chrMT	0.01	71001	72000	B12	-1
chrMT	0.057	72001	73000	B12	-1
chrMT	0.01	73001	74000	B12	-1
chrMT	0.01	74001	75000	B12	-1
chrMT	0.01	75001	76000	B12	-1
chrMT	0.01	76001	77000	B12	-1
chrMT	0.01	1	1000	C1	-1
chrMT	0.01	1001	2000	C1	-1
chrMT	0.01	2001	3000	C1	-1
chrMT	43.124	3001	4000	C1	0.734425284369705
chrMT	0.01	4001	5000	C1	-1
chrMT	0.01	5001	6000	C1	-1
chrMT	0.01	6001	7000	C1	-1
chrMT	0.01	7001	8000	C1	-1
chrMT	0.01	8001	9000	C1	-1
chrMT	0.01	9001	10000	C1	-1
chrMT	0.01	10001	11000	C1	-1
chrMT	0.01	11001	12000	C1	-1
chrMT	0.01	12001	13000	C1	-1
chrMT	0.01	13001	14000	C1	-1
chrMT	0.01	14001	15000	C1	-1
chrMT	0.018	15001	16000	C1	-1
chrMT	0.158	16001	17000	C1	-1
chrMT	0.01	17001	18000	C1	-1
chrMT	0.01	18001	19000	C1	-1
chrMT	0.01	19001	20000	C1	-1
chrMT	0.01	20001	21000	C1	-1
chrMT	0.01	21001	22000	C1	-1
chrMT	0.182	22001	23000	C1	-1
chrMT	0.03	23001	24000	C1	-1
chrMT	0.01	24001	25000	C1	-1
chrMT	6.302	25001	26000	C1	-1
chrMT	0.102	26001	27000	C1	-1
chrMT	0.412	27001	28000	C1	-1
chrMT	0.048	28001	29000	C1	-1
chrMT	0.01	29001	30000	C1	-1
chrMT	0.01	30001	31000	C1	-1
chrMT	0.01	31001	32000	C1	-1
chrMT	0.01	32001	33000	C1	-1
chrMT	0.126	33001	34000	C1	-1
chrMT	0.01	34001	35000	C1	-1
chrMT	0.01	35001	36000	C1	-1
chrMT	0.072	36001	37000	C1	-1
chrMT	0.01	37001	38000	C1	-1
chrMT	0.01	38001	39000	C1	-1
chrMT	0.092	39001	40000	C1	-1
chrMT	0.01	40001	41000	C1	-1
chrMT	0.01	41001	42000	C1	-1
chrMT	0.01	42001	43000	C1	-1
chrMT	0.05	43001	44000	C1	-1
chrMT	0.01	44001	45000	C1	-1
chrMT	0.1	45001	46000	C1	-1
chrMT	34.462	46001	47000	C1	0.410940712485809
chrMT	115.092	47001	48000	C1	2.15064993245085
chrMT	600.316	48001	49000	C1	4.53358449675863
chrMT	158.962	49001	50000	C1	2.61654430592475
chrMT	748.487	50001	51000	C1	4.85183963590322
chrMT	1154.665	51001	52000	C1	5.47726481848215
chrMT	458.046	52001	53000	C1	4.14335486721284
chrMT	22.895	53001	54000	C1	-0.179033153211078
chrMT	0.01	54001	55000	C1	-1
chrMT	0.01	55001	56000	C1	-1
chrMT	0.01	56001	57000	C1	-1
chrMT	9.548	57001	58000	C1	-1
chrMT	0.01	58001	59000	C1	-1
chrMT	0.01	59001	60000	C1	-1
chrMT	0.142	60001	61000	C1	-1
chrMT	0.23	61001	62000	C1	-1
chrMT	0.23	62001	63000	C1	-1
chrMT	0.01	63001	64000	C1	-1
chrMT	0.01	64001	65000	C1	-1
chrMT	0.01	65001	66000	C1	-1
chrMT	2.929	66001	67000	C1	-1
chrMT	0.01	67001	68000	C1	-1
chrMT	0.055	68001	69000	C1	-1
chrMT	0.01	69001	70000	C1	-1
chrMT	0.01	70001	71000	C1	-1
chrMT	0.01	71001	72000	C1	-1
chrMT	0.01	72001	73000	C1	-1
chrMT	0.01	73001	74000	C1	-1
chrMT	0.01	74001	75000	C1	-1
chrMT	0.176	75001	76000	C1	-1
chrMT	0.01	76001	77000	C1	-1
chrMT	0.01	1	1000	C2	-1
chrMT	0.01	1001	2000	C2	-1
chrMT	0.01	2001	3000	C2	-1
chrMT	29.825	3001	4000	C2	0.133074615997145
chrMT	0.01	4001	5000	C2	-1
chrMT	0.01	5001	6000	C2	-1
chrMT	0.01	6001	7000	C2	-1
chrMT	0.092	7001	8000	C2	-1
chrMT	0.01	8001	9000	C2	-1
chrMT	0.01	9001	10000	C2	-1
chrMT	0.01	10001	11000	C2	-1
chrMT	0.01	11001	12000	C2	-1
chrMT	0.01	12001	13000	C2	-1
chrMT	0.01	13001	14000	C2	-1
chrMT	0.01	14001	15000	C2	-1
chrMT	0.03	15001	16000	C2	-1
chrMT	0.19	16001	17000	C2	-1
chrMT	0.082	17001	18000	C2	-1
chrMT	0.096	18001	19000	C2	-1
chrMT	0.01	19001	20000	C2	-1
chrMT	0.01	20001	21000	C2	-1
chrMT	0.01	21001	22000	C2	-1
chrMT	0.01	22001	23000	C2	-1
chrMT	0.01	23001	24000	C2	-1
chrMT	0.108	24001	25000	C2	-1
chrMT	5.804	25001	26000	C2	-1
chrMT	0.01	26001	27000	C2	-1
chrMT	0.01	27001	28000	C2	-1
chrMT	0.01	28001	29000	C2	-1
chrMT	0.102	29001	30000	C2	-1
chrMT	0.01	30001	31000	C2	-1
chrMT	0.067	31001	32000	C2	-1
chrMT	0.01	32001	33000	C2	-1
chrMT	0.01	33001	34000	C2	-1
chrMT	0.42	34001	35000	C2	-1
chrMT	6.307	35001	36000	C2	-1
chrMT	8.426	36001	37000	C2	-1
chrMT	5.522	37001	38000	C2	-1
chrMT	12.292	38001	39000	C2	-1
chrMT	13.171	39001	40000	C2	-1
chrMT	13.283	40001	41000	C2	-1
chrMT	9.073	41001	42000	C2	-1
chrMT	20.204	42001	43000	C2	-0.428806575041605
chrMT	21.034	43001	44000	C2	-0.370724290901738
chrMT	15.882	44001	45000	C2	-0.776054921256253
chrMT	34.814	45001	46000	C2	0.356220061992595
chrMT	40.173	46001	47000	C2	0.562778679652065
chrMT	43.718	47001	48000	C2	0.684779880548472
chrMT	264.558	48001	49000	C2	3.28206461719129
chrMT	75.836	49001	50000	C2	1.47943534879552
chrMT	231.264	50001	51000	C2	3.08802127748682
chrMT	656.241	51001	52000	C2	4.59270630496246
chrMT	61.557	52001	53000	C2	1.17847540125371
chrMT	62.383	53001	54000	C2	1.19770541169688
chrMT	32.187	54001	55000	C2	0.243030594289042
chrMT	12.239	55001	56000	C2	-1
chrMT	7.75	56001	57000	C2	-1
chrMT	16.201	57001	58000	C2	-0.747364656312526
chrMT	4.367	58001	59000	C2	-1
chrMT	5.597	59001	60000	C2	-1
chrMT	20.552	60001	61000	C2	-0.40416872657199
chrMT	11.438	61001	62000	C2	-1
chrMT	3.244	62001	63000	C2	-1
chrMT	4.611	63001	64000	C2	-1
chrMT	7.761	64001	65000	C2	-1
chrMT	0.224	65001	66000	C2	-1
chrMT	2.689	66001	67000	C2	-1
chrMT	0.01	67001	68000	C2	-1
chrMT	0.01	68001	69000	C2	-1
chrMT	0.01	69001	70000	C2	-1
chrMT	0.01	70001	71000	C2	-1
chrMT	0.01	71001	72000	C2	-1
chrMT	0.01	72001	73000	C2	-1
chrMT	0.01	73001	74000	C2	-1
chrMT	0.01	74001	75000	C2	-1
chrMT	0.01	75001	76000	C2	-1
chrMT	0.01	76001	77000	C2	-1
chrMT	0.01	1	1000	C3	-1
chrMT	0.01	1001	2000	C3	-1
chrMT	0.01	2001	3000	C3	-1
chrMT	0.01	3001	4000	C3	-1
chrMT	0.01	4001	5000	C3	-1
chrMT	0.01	5001	6000	C3	-1
chrMT	0.01	6001	7000	C3	-1
chrMT	0.01	7001	8000	C3	-1
chrMT	0.01	8001	9000	C3	-1
chrMT	0.01	9001	10000	C3	-1
chrMT	0.01	10001	11000	C3	-1
chrMT	0.01	11001	12000	C3	-1
chrMT	0.01	12001	13000	C3	-1
chrMT	0.01	13001	14000	C3	-1
chrMT	0.01	14001	15000	C3	-1
chrMT	0.01	15001	16000	C3	-1
chrMT	0.098	16001	17000	C3	-1
chrMT	0.051	17001	18000	C3	-1
chrMT	0.01	18001	19000	C3	-1
chrMT	0.01	19001	20000	C3	-1
chrMT	0.126	20001	21000	C3	-1
chrMT	0.01	21001	22000	C3	-1
chrMT	0.01	22001	23000	C3	-1
chrMT	0.01	23001	24000	C3	-1
chrMT	0.01	24001	25000	C3	-1
chrMT	0.01	25001	26000	C3	-1
chrMT	0.01	26001	27000	C3	-1
chrMT	0.01	27001	28000	C3	-1
chrMT	0.01	28001	29000	C3	-1
chrMT	0.01	29001	30000	C3	-1
chrMT	0.01	30001	31000	C3	-1
chrMT	0.01	31001	32000	C3	-1
chrMT	0.01	32001	33000	C3	-1
chrMT	0.01	33001	34000	C3	-1
chrMT	0.01	34001	35000	C3	-1
chrMT	0.01	35001	36000	C3	-1
chrMT	0.01	36001	37000	C3	-1
chrMT	0.01	37001	38000	C3	-1
chrMT	0.01	38001	39000	C3	-1
chrMT	0.01	39001	40000	C3	-1
chrMT	0.01	40001	41000	C3	-1
chrMT	0.01	41001	42000	C3	-1
chrMT	0.01	42001	43000	C3	-1
chrMT	0.01	43001	44000	C3	-1
chrMT	0.01	44001	45000	C3	-1
chrMT	0.261	45001	46000	C3	-1
chrMT	0.01	46001	47000	C3	-1
chrMT	0.11	47001	48000	C3	-1
chrMT	0.01	48001	49000	C3	-1
chrMT	0.01	49001	50000	C3	-1
chrMT	0.01	50001	51000	C3	-1
chrMT	0.01	51001	52000	C3	-1
chrMT	0.01	52001	53000	C3	-1
chrMT	162.538	53001	54000	C3	2.64480401915338
chrMT	0.01	54001	55000	C3	-1
chrMT	0.01	55001	56000	C3	-1
chrMT	0.01	56001	57000	C3	-1
chrMT	0.01	57001	58000	C3	-1
chrMT	0.01	58001	59000	C3	-1
chrMT	0.01	59001	60000	C3	-1
chrMT	0.01	60001	61000	C3	-1
chrMT	0.01	61001	62000	C3	-1
chrMT	0.01	62001	63000	C3	-1
chrMT	0.01	63001	64000	C3	-1
chrMT	0.01	64001	65000	C3	-1
chrMT	0.01	65001	66000	C3	-1
chrMT	0.01	66001	67000	C3	-1
chrMT	0.116	67001	68000	C3	-1
chrMT	0.136	68001	69000	C3	-1
chrMT	0.01	69001	70000	C3	-1
chrMT	0.01	70001	71000	C3	-1
chrMT	0.01	71001	72000	C3	-1
chrMT	0.01	72001	73000	C3	-1
[truncated: 1,544 more rows]
