# Supplementary material for: Genetically controlled mtDNA deletions prevent ROS damage by arresting oxidative phosphorylation
Source: eLife. 2022 Jul 8;11:e76095. doi: 10.7554/eLife.76095 (PMC9427111; doi:10.7554/eLife.76095)
Supplement: Source data 1. [file elife-76095-data1.xlsx]

## Sheet: Data S19 - Primers
README:Primers used for PCR
Target	Direction	5´-> 3´Sequence	Application	PCR template
ATP6	F	TCCATATTCATTTGCATTATCAGC	qPCR	Genomic DNA
ATP6	R	CCAGCAGGTACGAATAATGAGA	qPCR	Genomic DNA
ATP8	F	TGCCACAATTAGTTCCATTTT	qPCR	Genomic DNA
ATP8	R	GATCATAGGTAAAAAGAATTGTGAGAA	qPCR	Genomic DNA
COB	F	AAATTGGAGCATGCCATGTA	qPCR	Genomic DNA
COB	R	AGCGATTTGTCCCATTAAGA	qPCR	Genomic DNA
COX1	F	CAACGGGGACAATAGCATGC	qPCR	Genomic DNA
COX1	R	CGGACAGTTCTTACCTTGCG	qPCR	Genomic DNA
COX2	F	TTAGATTCGTTGTAACAGCTGC	qPCR	Genomic DNA
COX2	R	GAGCATTGTCCATAGAAAACACC	qPCR	Genomic DNA
COX3	F	TGCATGTTGACCACCTGTAG	qPCR	Genomic DNA
COX3	R	GGTAATTCGGTAGGTTGTACAGC	qPCR	Genomic DNA
OLI1	F	GCAGGTATTGGTATTGCTATCG	qPCR	Genomic DNA
OLI1	R	CCTGTAGCTTCTGATAAGGCG	qPCR	Genomic DNA
21S RNA	F	GGTGTGAACTCTGCTCCATG	qPCR	Genomic DNA
21S RNA	R	AGGCCAAGGAATTTCGCTAC	qPCR	Genomic DNA
15S RNA	F	TCCTGACTAATATTTGTGCCAGC	qPCR	Genomic DNA
15S RNA	R	GCTCGCCCTCTTTGTGTTAC	qPCR	Genomic DNA
VAR1	F	AAATATTTAGTTGGTTGATCTAT	qPCR	Genomic DNA
VAR1	R	AGTGTACTAGTTCTACCATTATT	qPCR	Genomic DNA
CDC5	F	CACCACAGTTCTCCGATTGG	qPCR	Genomic DNA
CDC5	R	ACTTGCTACCCAACCTTCCC	qPCR	Genomic DNA
COX4	R	AAAAAGTAAAAGAGAAACAGAAGGGCAACTTGAATGATAAGATTAATCGATGAATTCGAGCTCG	Cox4-EGFP tagging	pYM27
COX4	F	TACAAACTAAACCCTGTTGGTGTTCCAAATGATGACCACCATCAC CGTACGCTGCAGGTCGAC	Cox4-EGFP tagging	pYM27
MIP1	F	TCGAGATGGGGATTATATGTAGTTGTTGAGCAACGAGGGACAAGTCAGCTGAAGCTTCGTACGC	Deletion	pUG6
MIP1	R	TGCTGTATATATAAATACAAATGCGAAAGCTAATGCAGATTTTGCGCATAGGCCACTAGTGGATCTG	Deletion	pUG6
HIS3	F	AAGAATATACTAAAAAATGGGCAGGCAAGATAAACGAAGGCAAAGCAGCTGAAGCTTCGTACGC	Disomic strain construction	pUG6
HIS3	R	TGACACCGATTATTTAAAGCTGCAGCATACGATATATATACATGTGCATAGGCCACTAGTGGATCTG	Disomic strain construction	pUG6
can1::STE2pr-HIS3	F	ATCAGGGAATCCCTTTTTGC	Disomic strain construction	Y7029 genomic DNA
can1::STE2pr-HIS3	R	ACTCCGTCTGCTTTCTTTTCG	Disomic strain construction	Y7029 genomic DNA
RCL1	R	ATTGTCAACACTTTTCCACTAGGATAATCCTCCAAAAGTATAGCATGGCTGCAGGTCGACGGATC	Disomic strain construction	YDpU
RCL1	F	CTTATATACAGTGGTCTAATATCTATTGAATAATATTAGAACATGGGGATCCGGTGATTGATTG	Disomic strain construction	YDpU
RLP7	R	TAACTAACAACCTATGTACTATACAATTTTAAAATACTCTCTTAATGGCTGCAGGTCGACGGATC	Disomic strain construction	YDpU
RLP7	F	AGAAGAGGCTGCCACAGGGAAAAAGAATAAGATATACAAGTCACAGGGATCCGGTGATTGATTG	Disomic strain construction	YDpU
TAF4	R	AACACTATACCTTTAAATATTATAGACAGTATAAGAGATGAGCAATGGCTGCAGGTCGACGGATC	Disomic strain construction	YDpU
TAF4	F	ATCGATTGGTAGTGCACATATTGTCTTTCGGCATCATATCACATAGGGATCCGGTGATTGATTG	Disomic strain construction	YDpU
ORC3	R	TTGTTTACATACAGAGTCGTAGTATCACAAGAGTAGTCCAACAGGTGGCTGCAGGTCGACGGATC	Disomic strain construction	YDpU
ORC3	F	ATATGTATGGTTATTTATTTACTTATTTATCCGTGCATTCTTTATGGGATCCGGTGATTGATTG	Disomic strain construction	YDpU
AUR1	R	TCTACATAAGACCAACCGTATCCGTAATGGCAGATAAAATACTCATGGCTGCAGGTCGACGGATC	Disomic strain construction	YDpU
AUR1	F	TTGCGGTTTTCATATTTTAAAAAGCTTTTAATCATTCCTTTGCGTGGGATCCGGTGATTGATTG	Disomic strain construction	YDpU
SQT1	R	TTATTGAATTTGTTTTTTTGTTATTTATGTATACGCGACTATCTATGGCTGCAGGTCGACGGATC	Disomic strain construction	YDpU
SQT1	F	CTTTTGAAGACCAAAACAGCACCAAATAGCGACACATTAAGCGTAGGGATCCGGTGATTGATTG	Disomic strain construction	YDpU
ERG11	R	ACTTCTCTCTTTTTCTGTTTTTTTTTTTTTTCTCAGTTACAAACCTGGCTGCAGGTCGACGGATC	Disomic strain construction	YDpU
ERG11	F	TTGCAGCAGGCTTGAATAGAAACAGAACAAACGAGTAATACAAGGGGGATCCGGTGATTGATTG	Disomic strain construction	YDpU
SAD1	R	CATGGTTCATCATTTAGTGGGCGTTAACCTAAAGCGCTGTTTATATGGCTGCAGGTCGACGGATC	Disomic strain construction	YDpU
SAD1	F	ACTGGTAGTCCCAGTGCCAATTTTTTTTTTTTACTTTCTTTTCTTGGGATCCGGTGATTGATTG	Disomic strain construction	YDpU
MCD1	R	GAAAAGACAACTCAATTGCACAATTACTTTACAAAAAACACGACATGGCTGCAGGTCGACGGATC	Disomic strain construction	YDpU
MCD1	F	CAGCTTACTGGGTCCACCAAGAAATCCCCTCGGCGTAACTAGGTTGGGATCCGGTGATTGATTG	Disomic strain construction	YDpU
SOD2	F	AAACGACACAGTGGAAAAAAAAAGGTATTTTCTTTCTTTCTTTCTCAGCTGAAGCTTCGTACGC	Deletion	pUG6
SOD2	R	AACGAAACCCCAATTGATAACTATACCTCCTAAAAACGTACCAGGGCATAGGCCACTAGTGGATCTG	Deletion	pUG6
SOD1	F	TACTTACTTACATACGGTTTTTATTCAAGTATATTATCATTAACACAGCTGAAGCTTCGTACGC	Deletion	pUG6
SOD1	R	GCAAGAAAGCAATCGCGCAGACAAATAAAACATAATTAATTTATAGCATAGGCCACTAGTGGATCTG	Deletion	pUG6
CCP1	F	AATAATACGAAATATAACCAATAAATAATATCTTTCCTCAGTGACCAGCTGAAGCTTCGTACGC	Deletion	pUG6
CCP1	R	ATTTCGCATTCATGCAGACGCAAACACACACGTATATCTACAATTGCATAGGCCACTAGTGGATCTG	Deletion	pUG6
YAP1	F	TTGCCACCCAAAACGTTTAAAGAAGGAAAAGTTGTTTCTTAAACCCAGCTGAAGCTTCGTACGC	Deletion	pUG6
YAP1	R	AGAAAAAGTTCTTTCGGTTACCCAGTTTTCCATAAAGTTCCCGCTGCATAGGCCACTAGTGGATCTG	Deletion	pUG6
ATG32	F	AAAAAGTGAGTAGGAACGTGTATGTTTGTGTATATTGGAAAAAGGCAGCTGAAGCTTCGTACGC	Deletion	pUG6
ATG32	R	TCCTAATCACAAAAGCAAAAAAAATCTGCCAGGAACAGTAAACATGCATAGGCCACTAGTGGATCTG	Deletion	pUG6
RTG2	R	AAGGATTTCGTATTTATTGTTCAAGTATTTAAAGACTAGATGTCTGCATAGGCCACTAGTGGATCTG	Deletion	pUG6
RTG2	F	CTTTACTAAGGATTGTTTTGAACGAAAAGTGTAGGCGTGCCACAACAGCTGAAGCTTCGTACGC	Deletion	pUG6
RTG3	F	ACTCTTATTTTTGTCAGGCGAACCTACTTCTTAAATAAGTGAAGACAGCTGAAGCTTCGTACGC	Deletion	pUG6
RTG3	R	TGACCTTTTTCAAATTTAATTTTTTCCCGCTAATAAGACCATAAAGCATAGGCCACTAGTGGATCTG	Deletion	pUG6
MIP1	F	TCGAGATGGGGATTATATGTAGTTGTTGAGCAACGAGGGACAAGTGGGGATCCGGTGATTGATTG	Double deletion	YDpU
MIP1	R	TGCTGTATATATAAATACAAATGCGAAAGCTAATGCAGATTTTGCTGGCTGCAGGTCGACGGATC	Double deletion	YDpU
