# Supplementary material for: Genetically controlled mtDNA deletions prevent ROS damage by arresting oxidative phosphorylation
Source: eLife journal article supplement (doi:10.7554/elife.76095), 2022-07-08
Supplement: supp [file elife-76095-supp-v1.zip]

Archive with 14 entries (14 files):
- elife_poa_e76095_Transparent_Reporting_File.docx
- elife_poa_e76095_Figure_1_figure_supplement_1.pdf
- elife_poa_e76095_Figure_1_figure_supplement_2.pdf
- elife_poa_e76095_Figure_2_figure_supplement_1.pdf
- elife_poa_e76095_Figure_3_figure_supplement_1.pdf
- elife_poa_e76095_Figure_3_figure_supplement_2.pdf
- elife_poa_e76095_Figure_3_figure_supplement_3.pdf
- elife_poa_e76095_Figure_4_figure_supplement_1.pdf
- elife_poa_e76095_Figure_6_figure_supplement_1.pdf
- elife_poa_e76095_Figure_6_figure_supplement_2.pdf
- elife_poa_e76095_Figure_6_figure_supplement_3.pdf
- elife_poa_e76095_Figure_6_figure_supplement_4.pdf
- elife_poa_e76095_Figure_6_figure_supplement_5.pdf
- elife_poa_e76095_Supplementary_file_1.docx
