# Supplementary material for: Genetically controlled mtDNA deletions prevent ROS damage by arresting oxidative phosphorylation
Source: eLife journal article supplement (doi:10.7554/elife.76095), 2022-07-08
Supplement: supp [file elife-76095-supp-v1.zip › elife_poa_e76095_Supplementary_file_1.docx]

**Supplementary File 1**

List of selection agents used in evolution experiments

| **Selection** | **Compound** | **Concentration** | **Type** |
| --- | --- | --- | --- |
| Mitochondrial stress | Paraquat | 400 µg/mL | Mitochondrial producer |
| Arsenic (III) stress | Arsenite (NaAsO2) | 3 mM | Toxic metalloid |
| Rapamycin stress | Sirolimus | 0.8 µg/mL | TOR-inhibitor |
| Citric Acid stress | Citric Acid | 62.5 mg/mL | Weak organic acid |
| Glycine use | L-Glycine | 160.86 mg/mL (30 mg N/mL) | Nitrogen source |
| Citrulline use | L-Citrulline | 125.14 mg/mL (30 mg N/mL) | Nitrogen source |
| Tryptophan use | L-Tryptophan | 218.82 mg/mL (30 mg N/mL) | Nitrogen source |
| Isoleucine use | L-Isoleucine | 281.1 mg/mL (30 mg N/mL) | Nitrogen source |
