# Supplementary figures and images for: Genetically controlled mtDNA deletions prevent ROS damage by arresting oxidative phosphorylation
Source: eLife journal article supplement (doi:10.7554/elife.76095), 2022-07-08

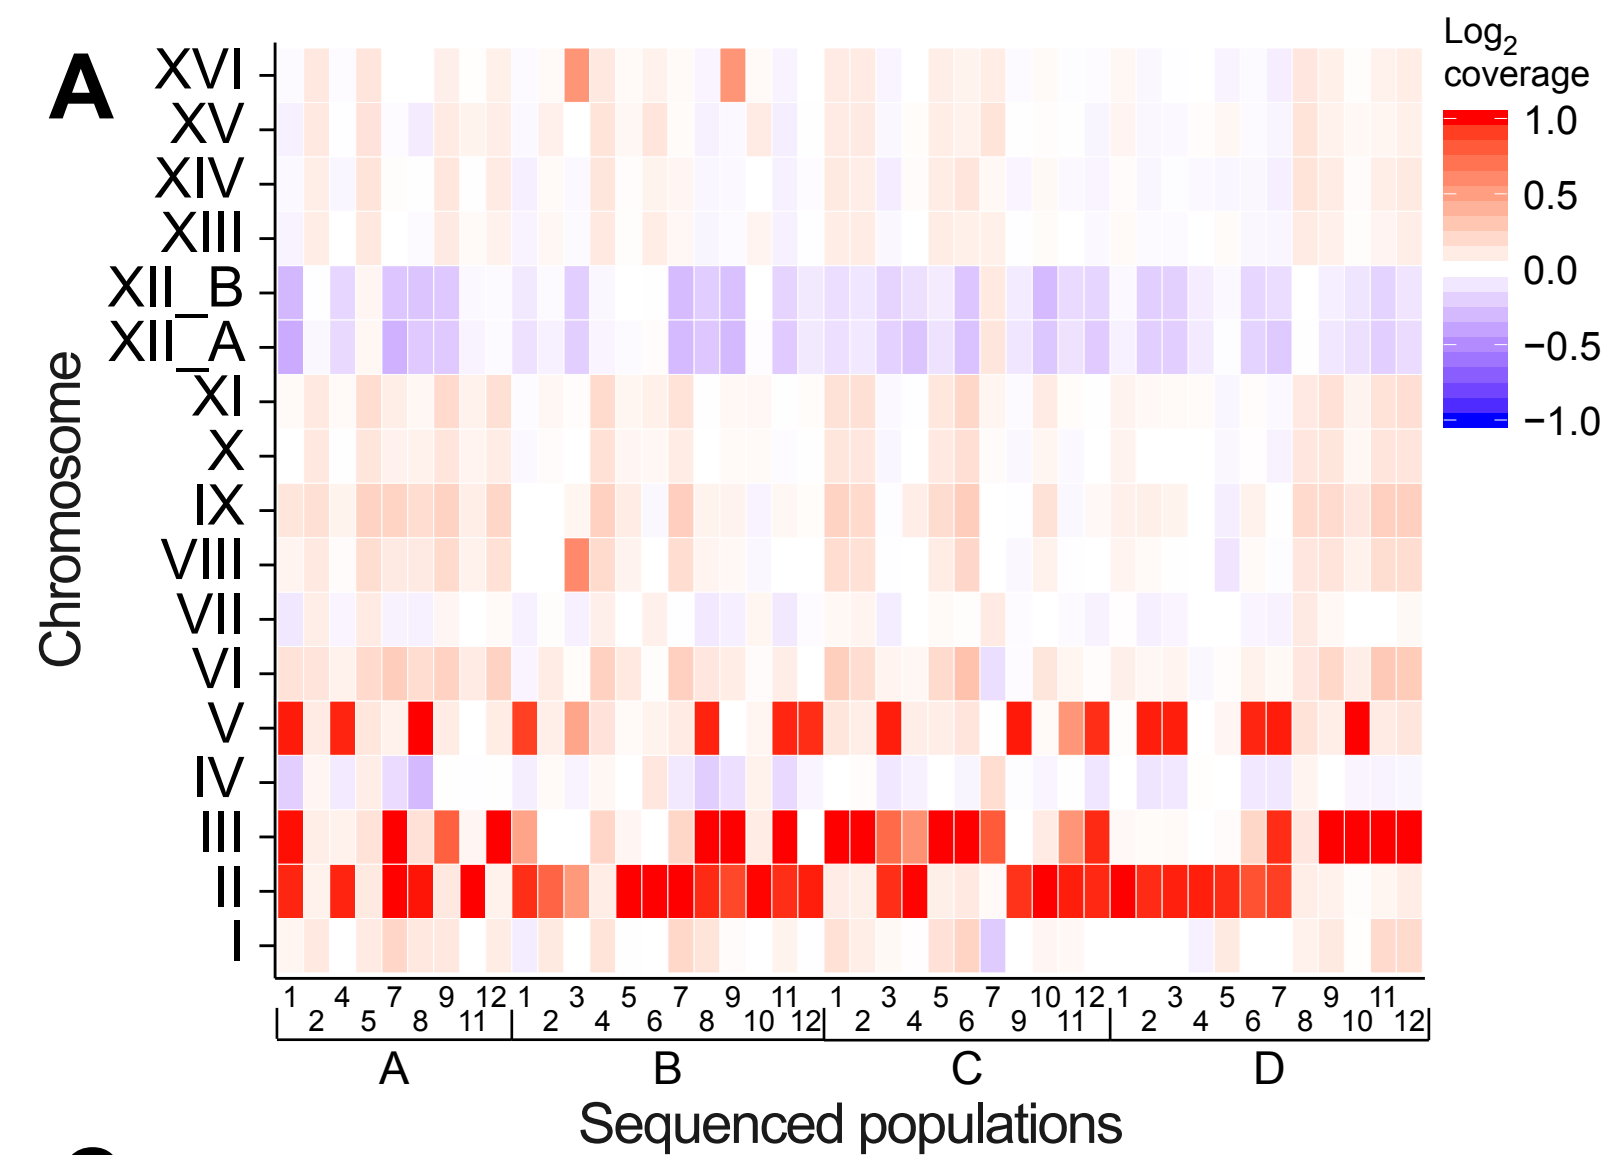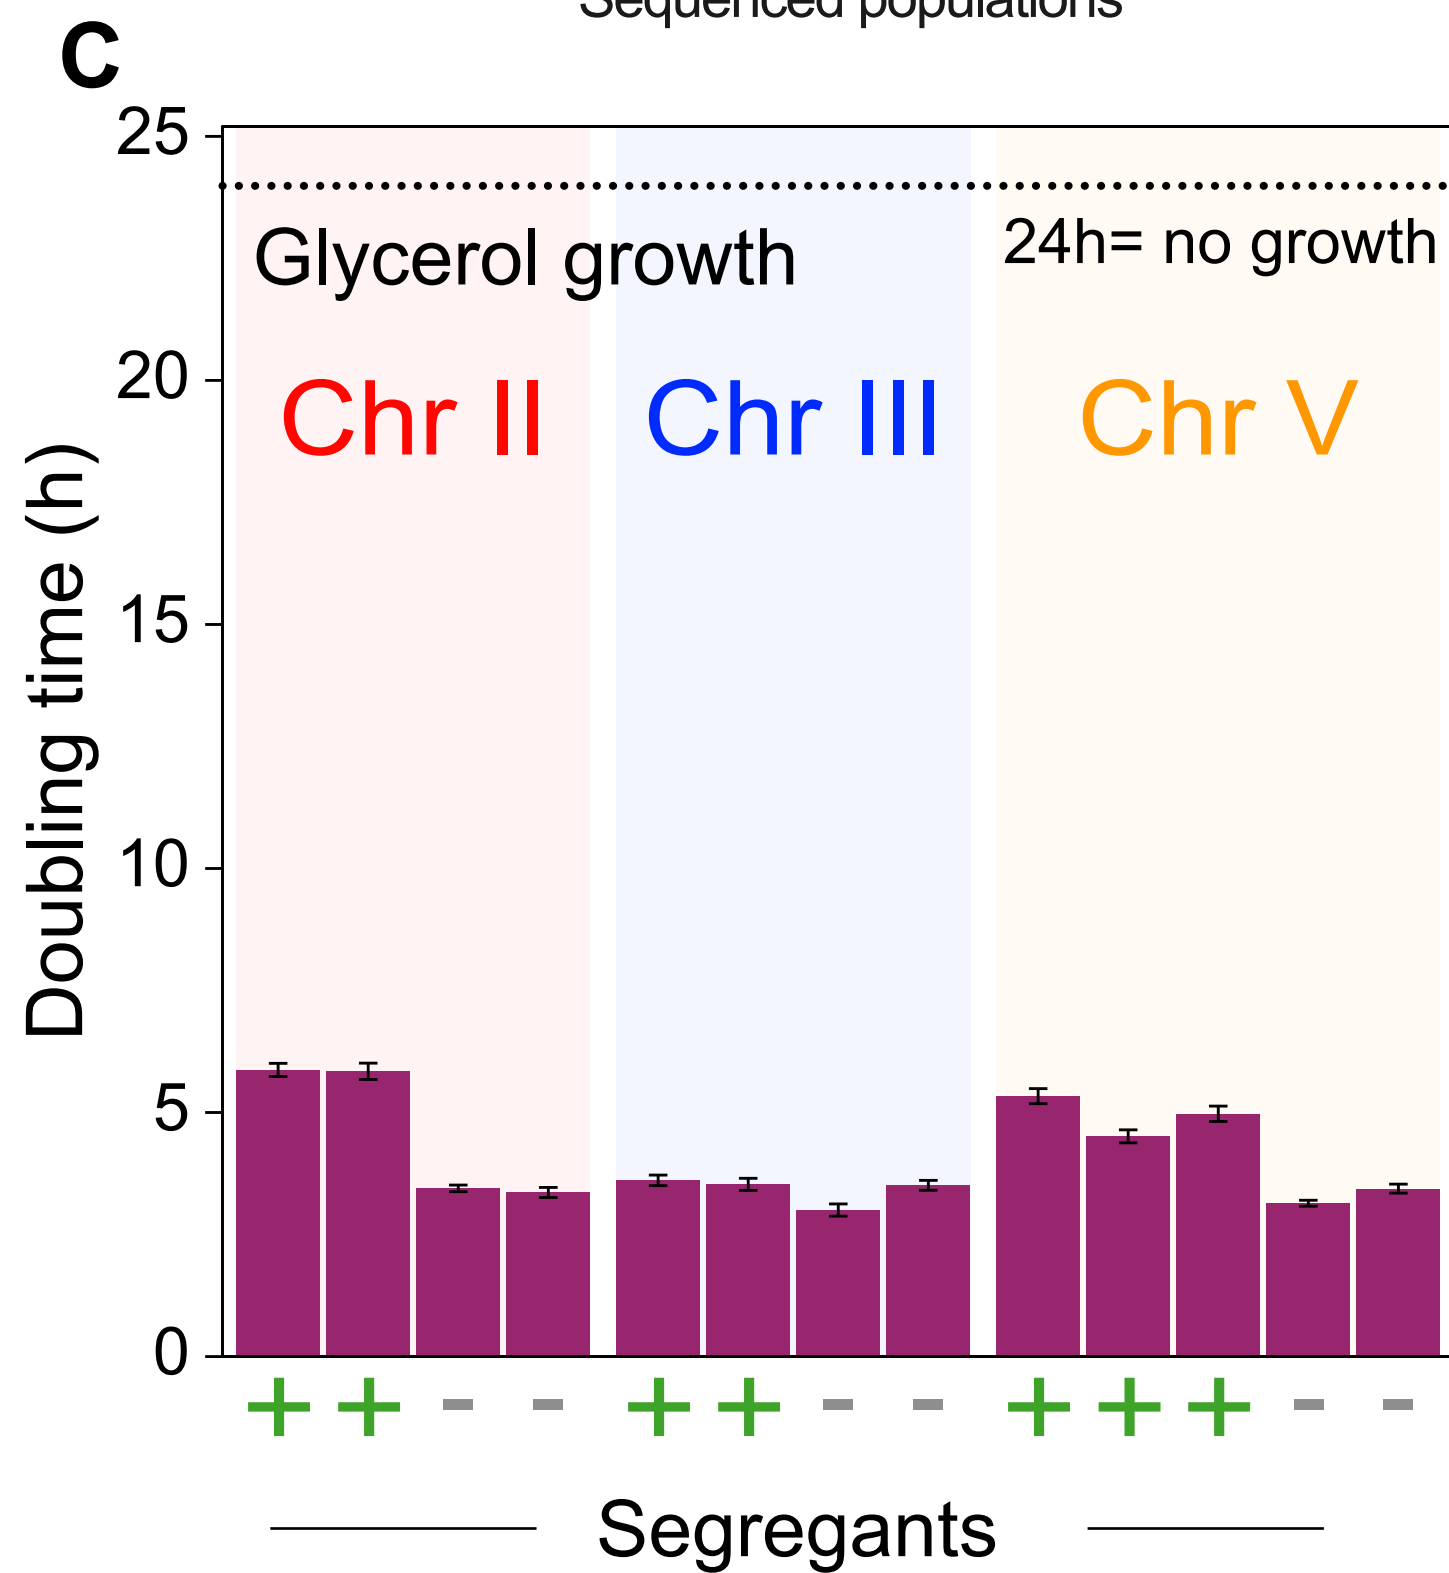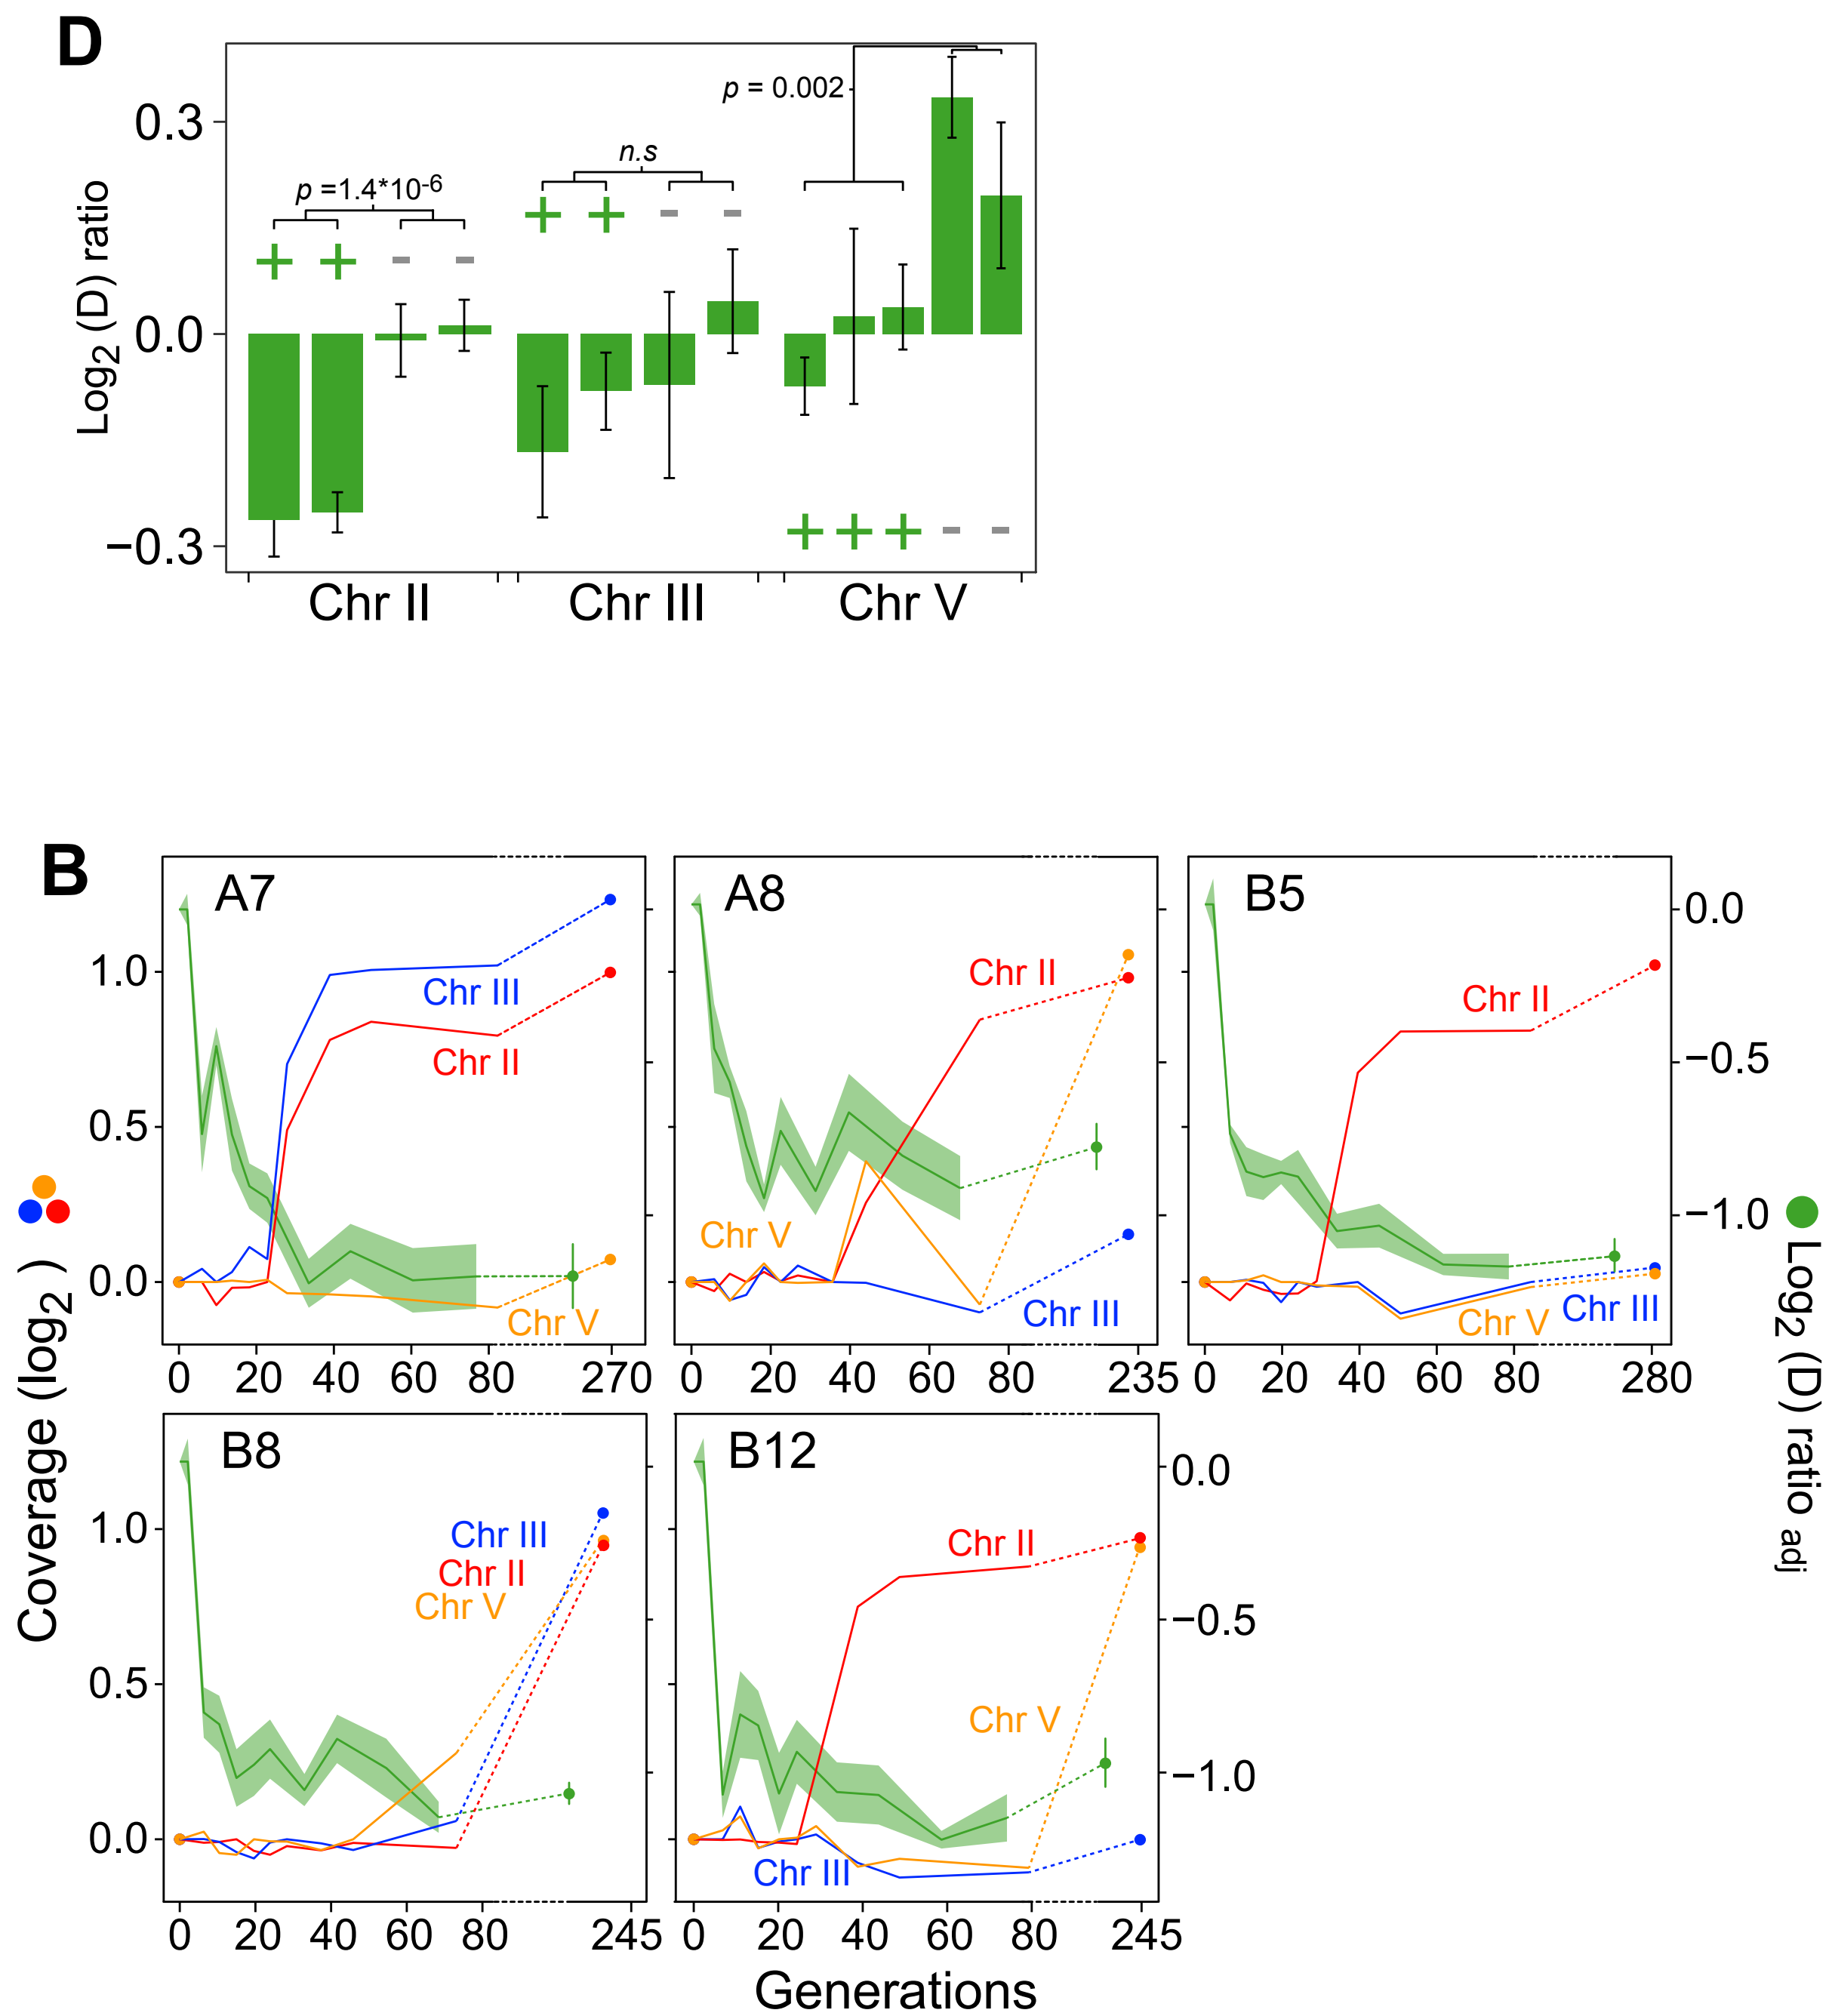

Supplement: supp [file elife-76095-supp-v1.zip]

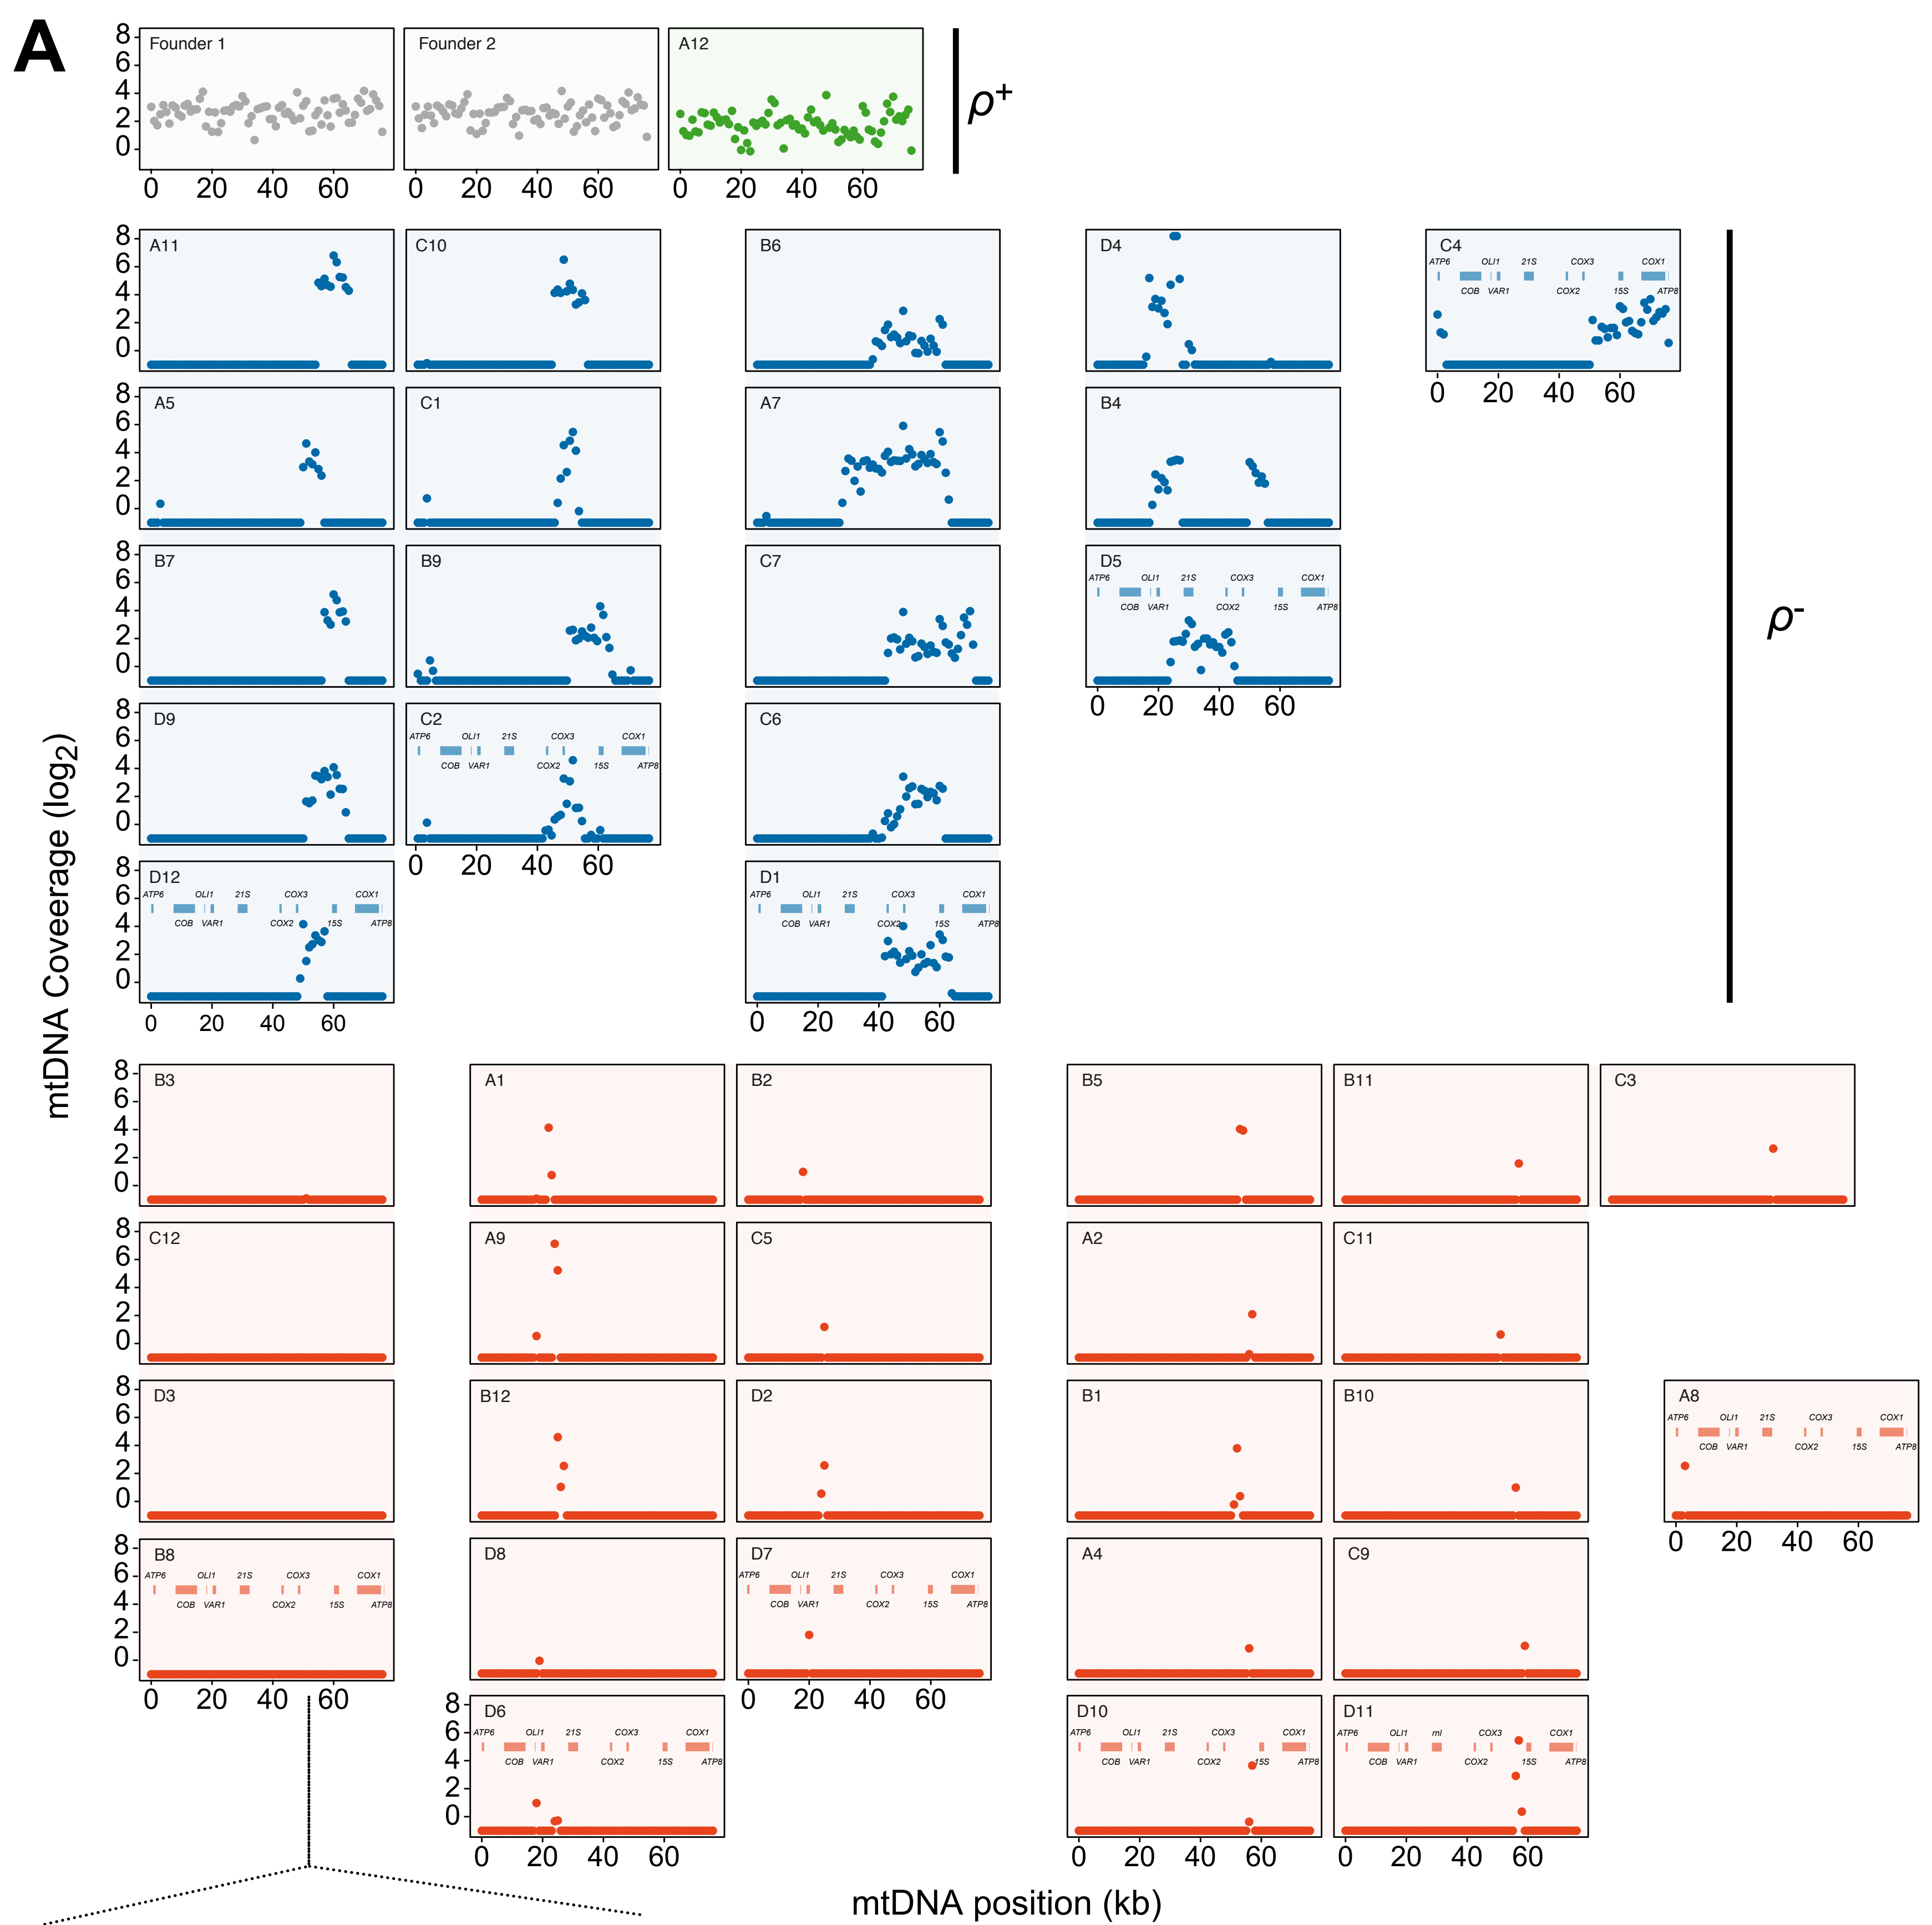

**B**

$\rho^+$  Founder  $\rho^0$   $\Delta mip1$   $\rho^-$  A7 cy 50 PQ  $\rho^{--}$  B8 cy 50 PQ

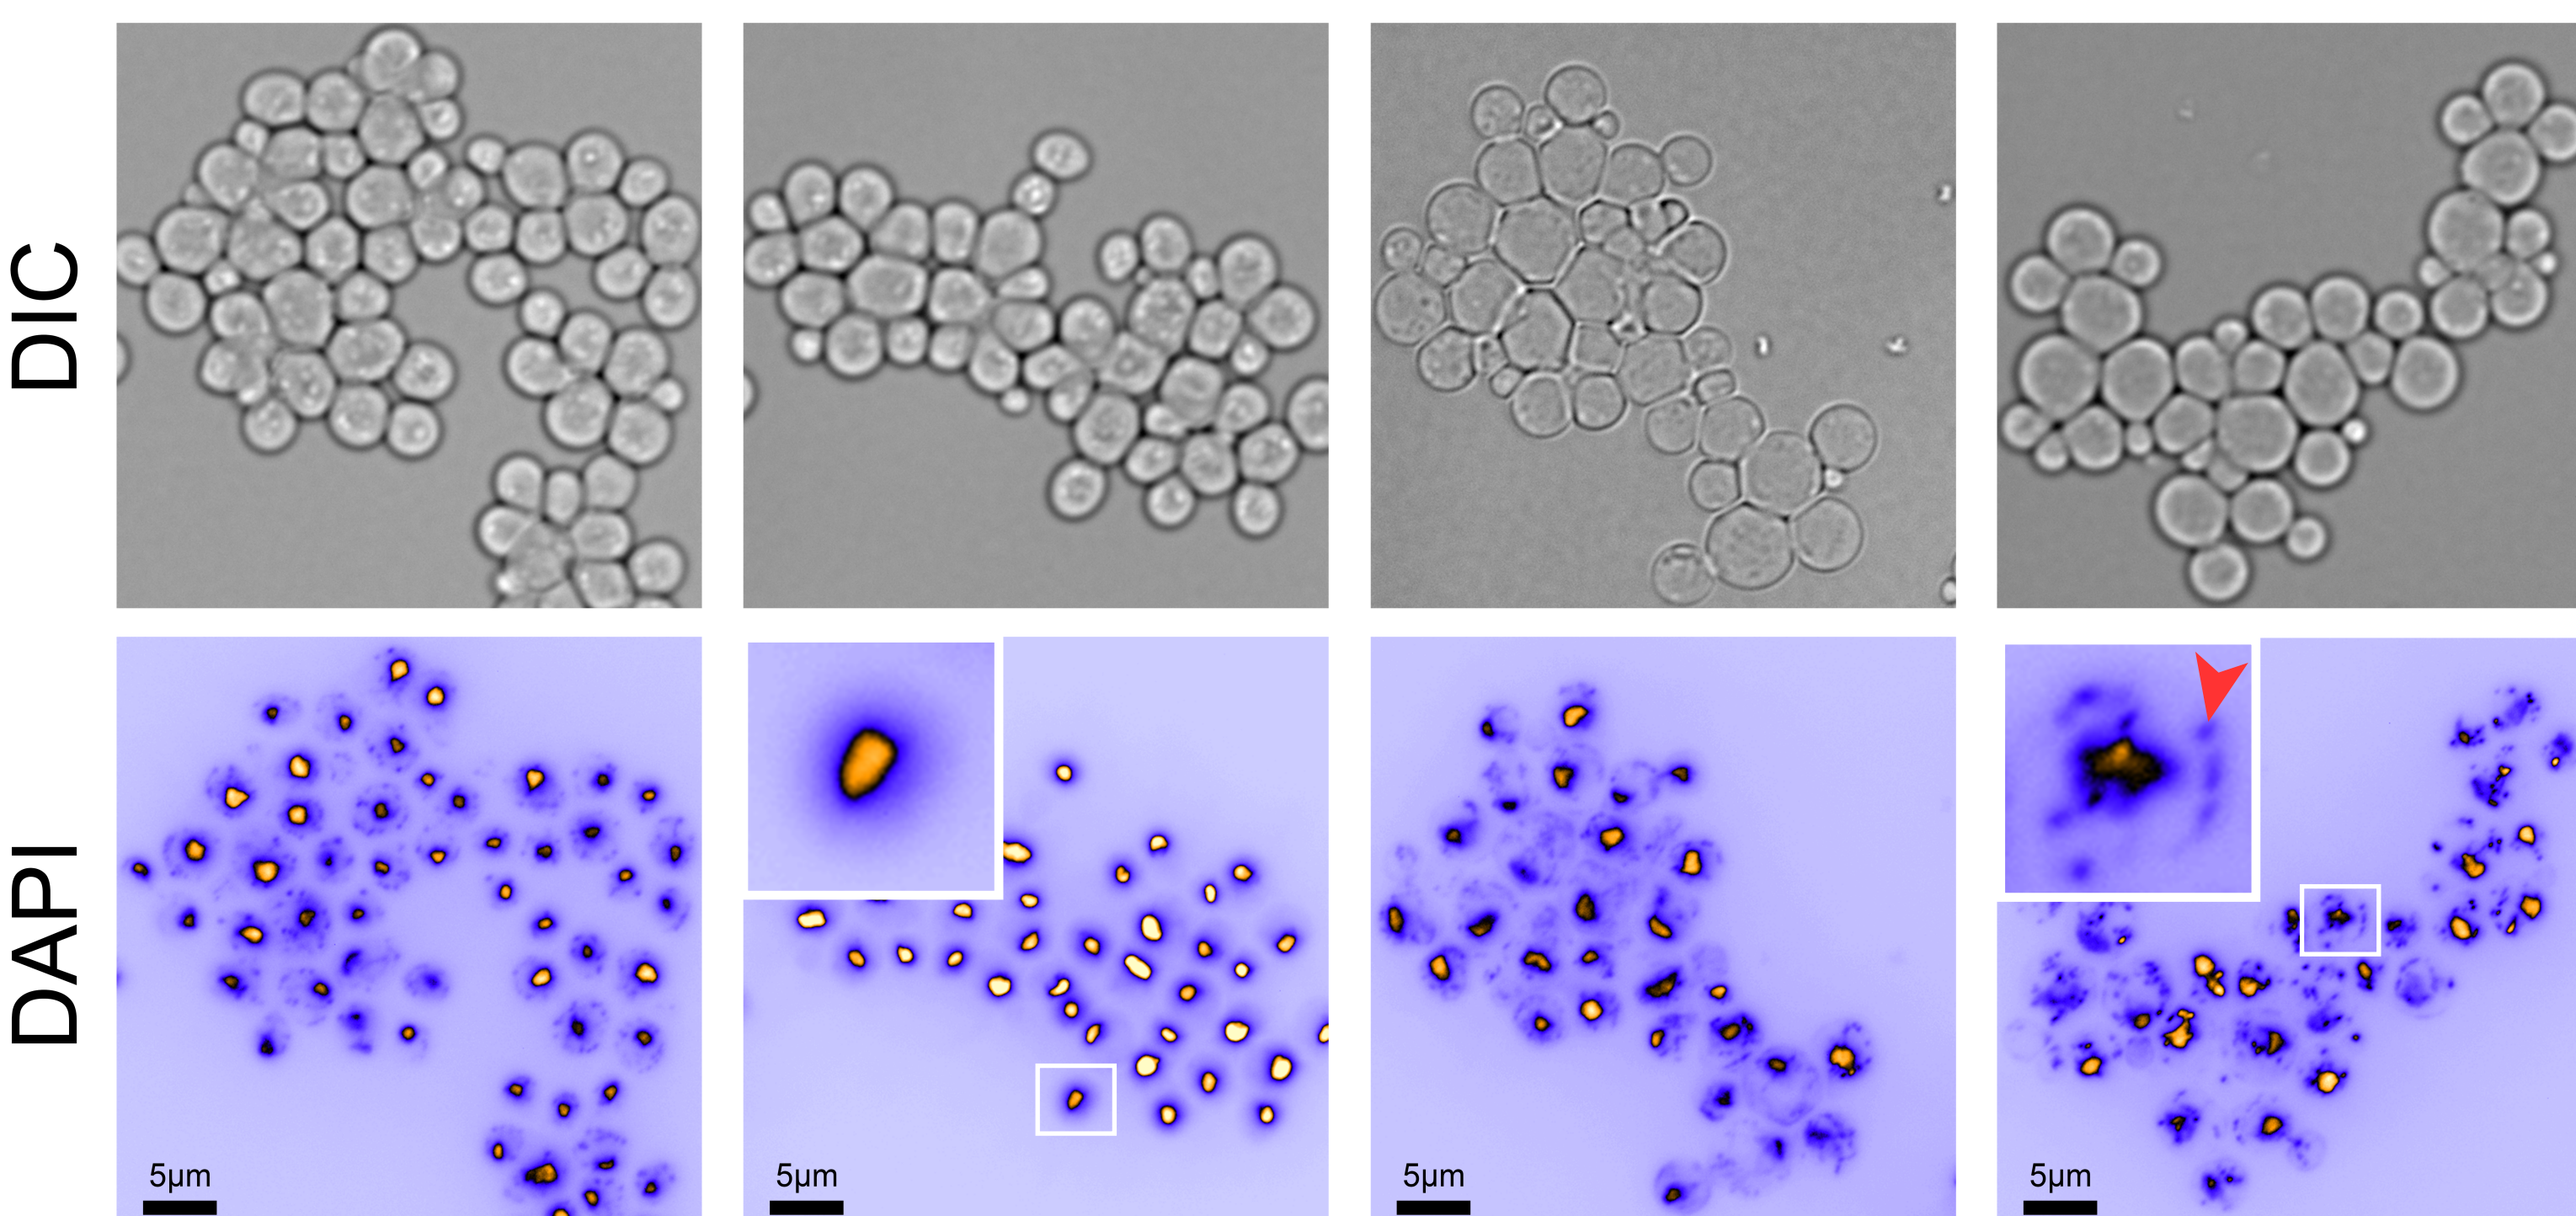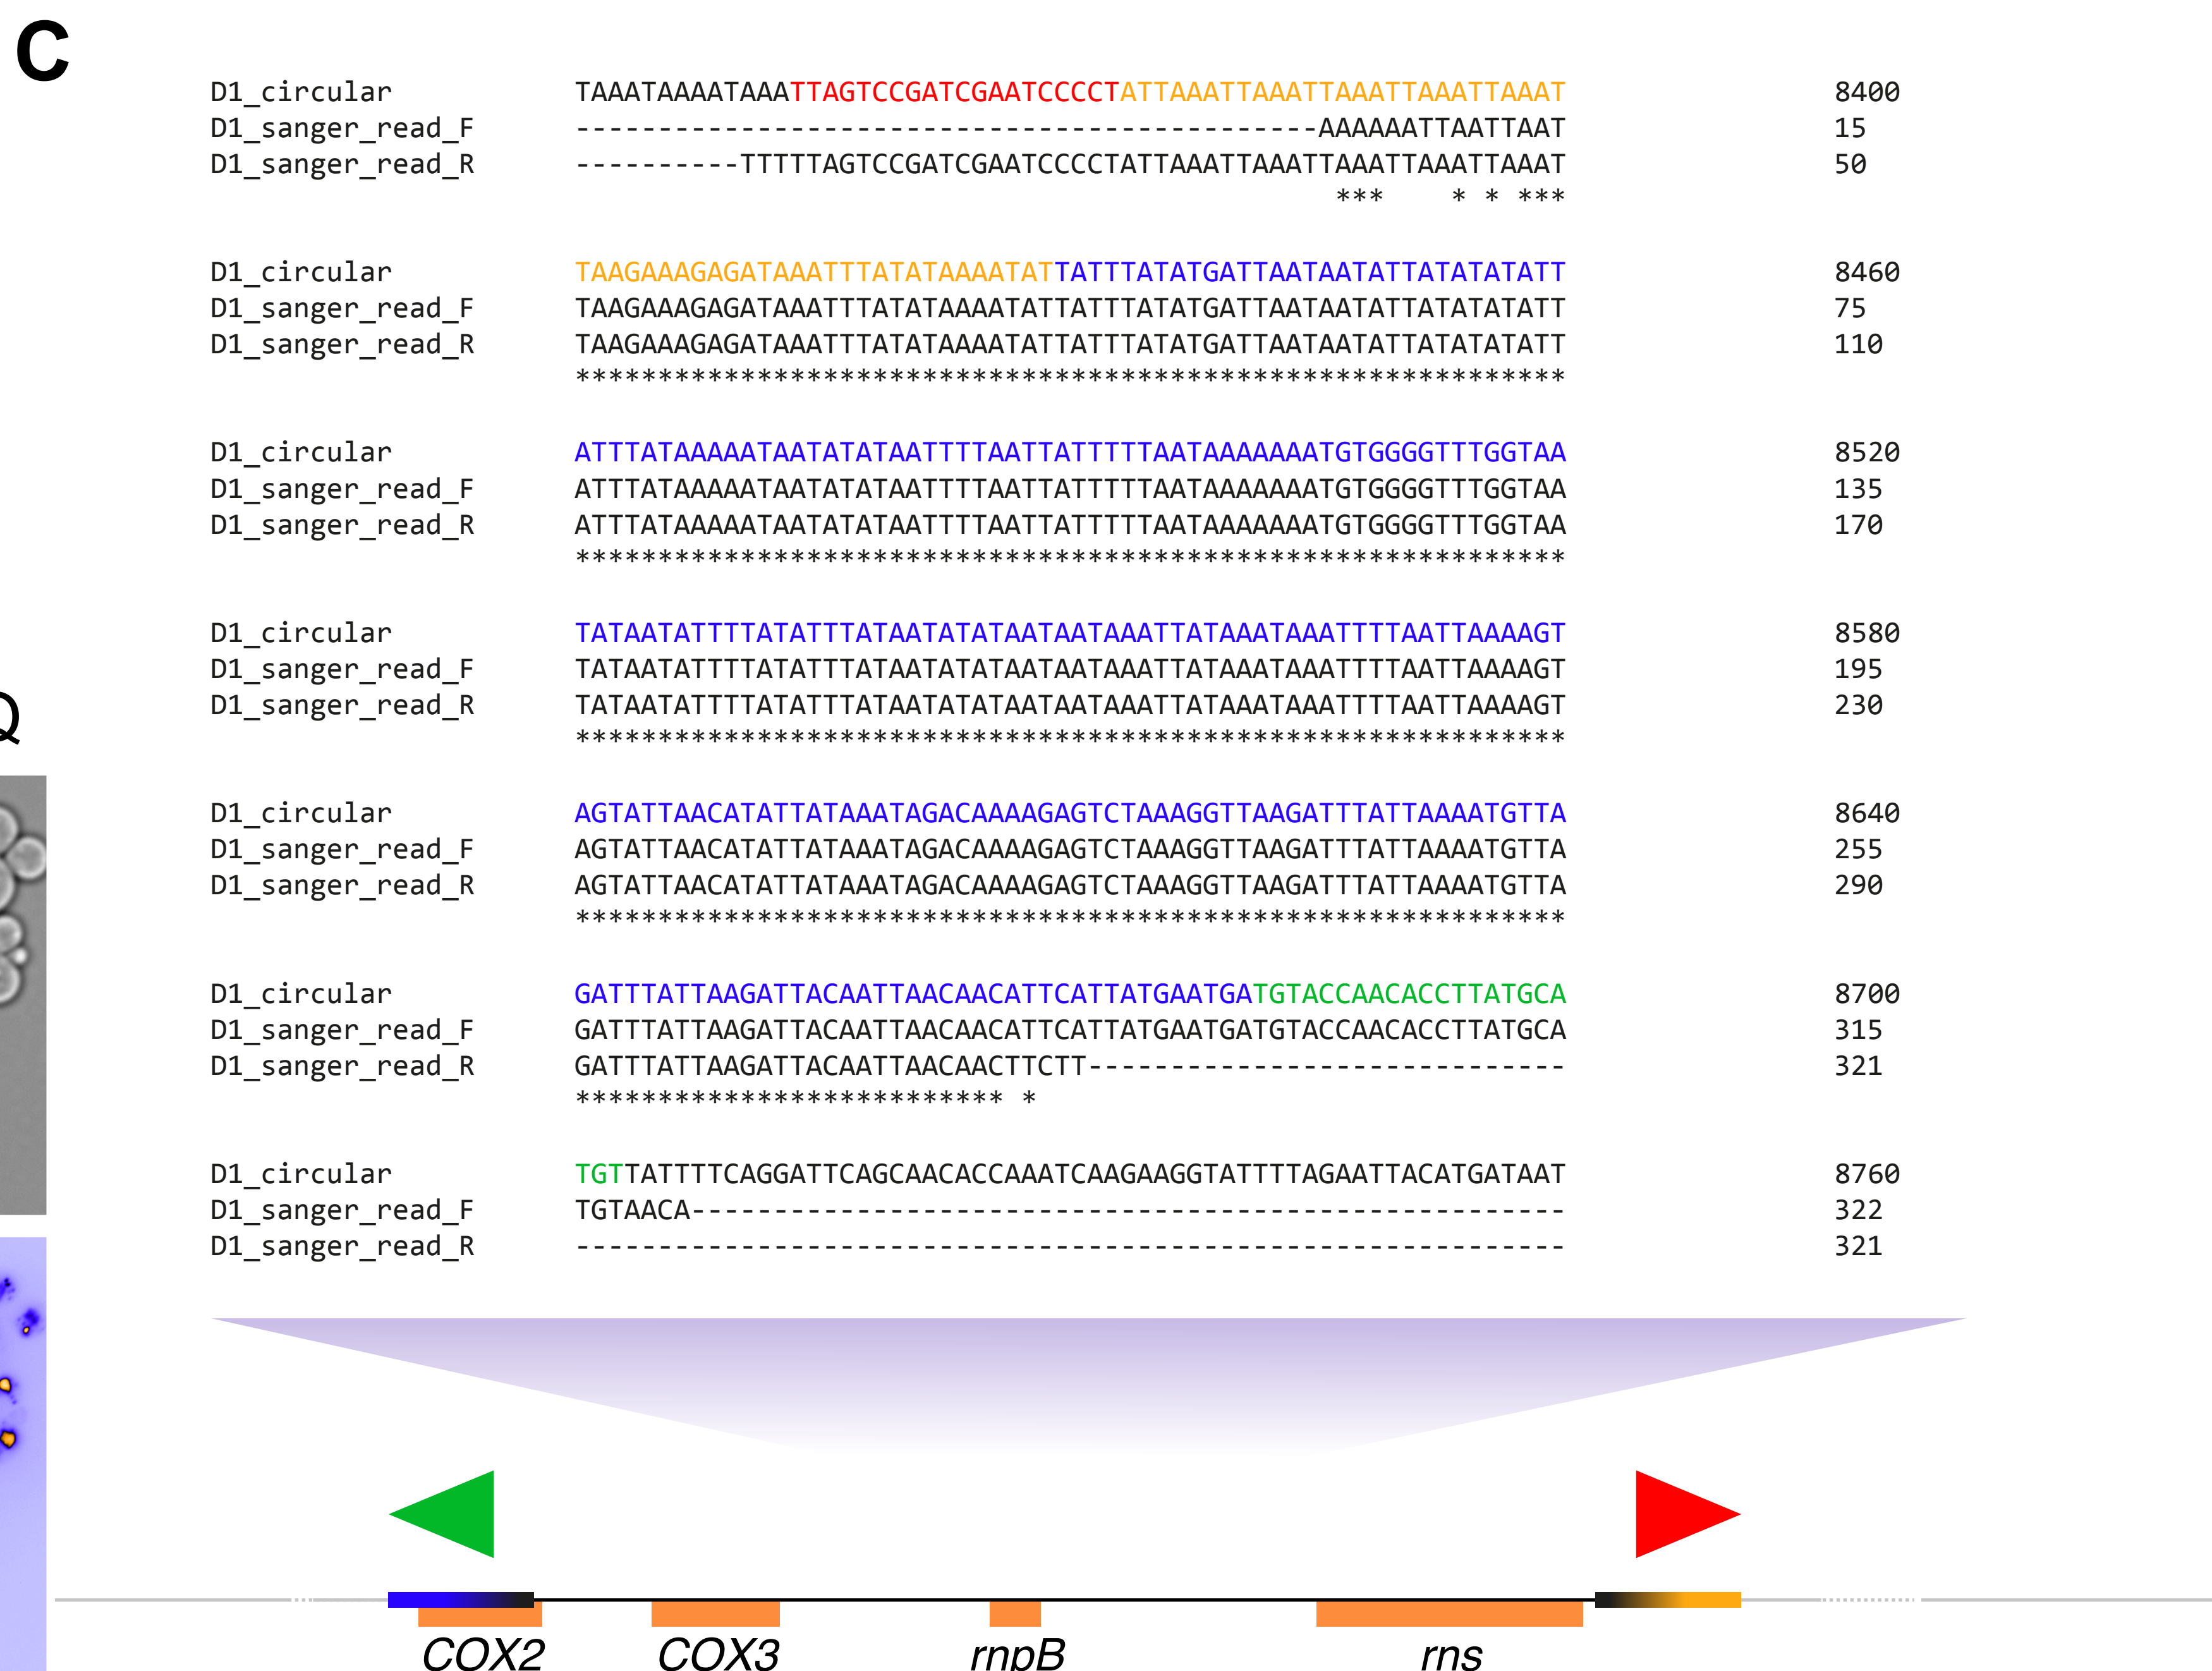

Supplement: supp [file elife-76095-supp-v1.zip]

**A**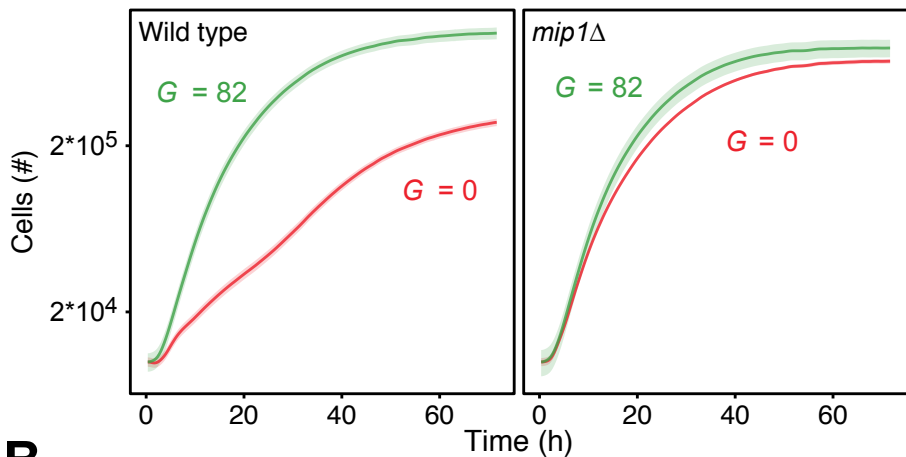**B**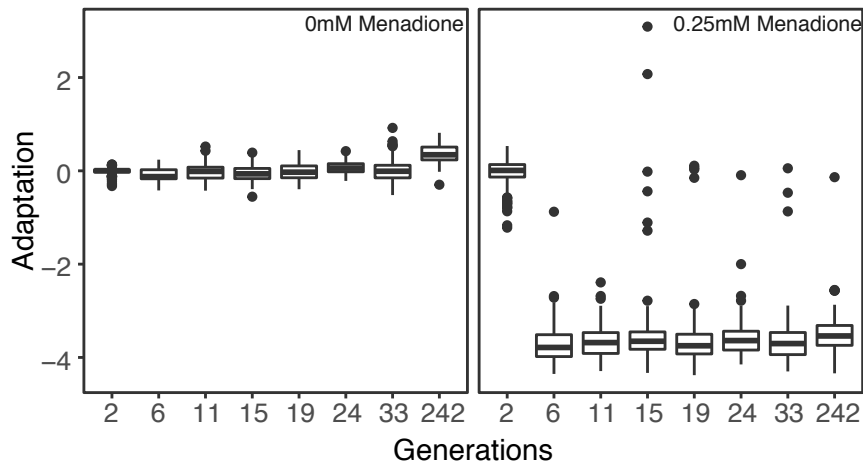

Supplement: supp [file elife-76095-supp-v1.zip]

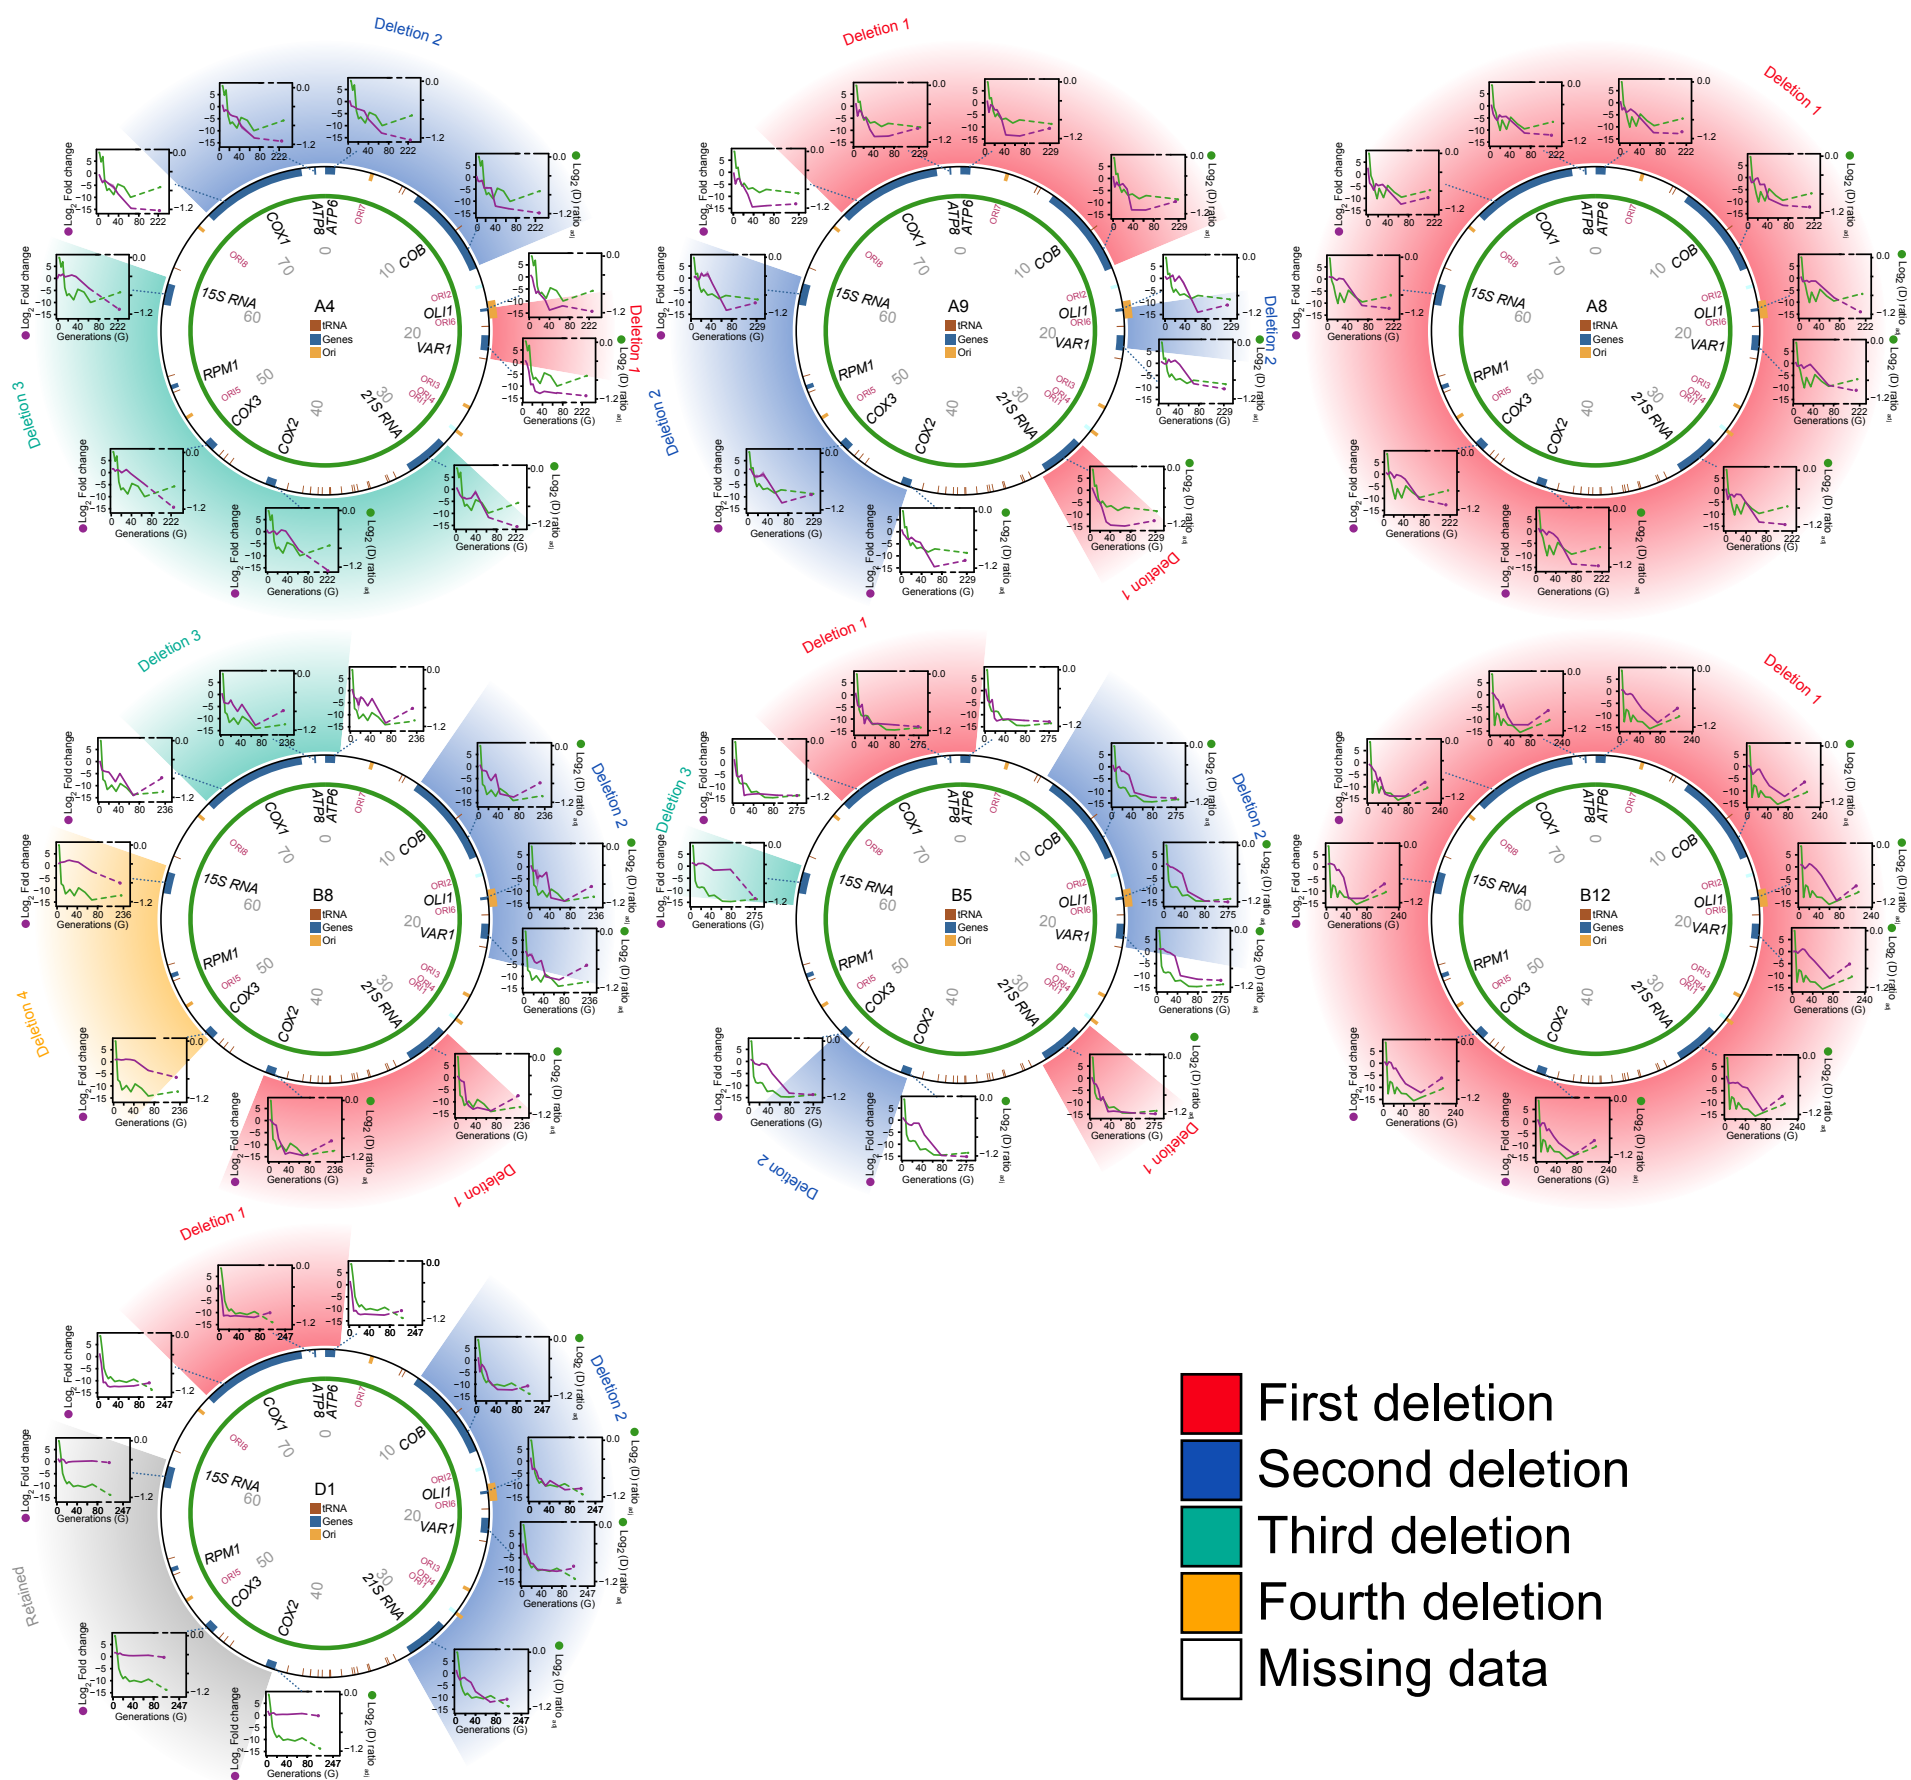

Supplement: supp [file elife-76095-supp-v1.zip]

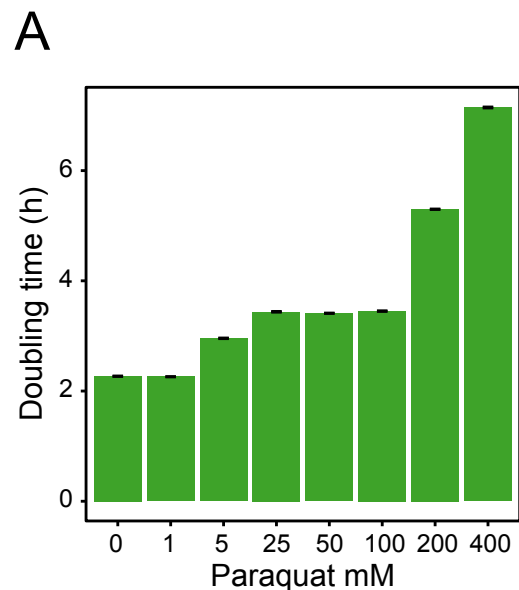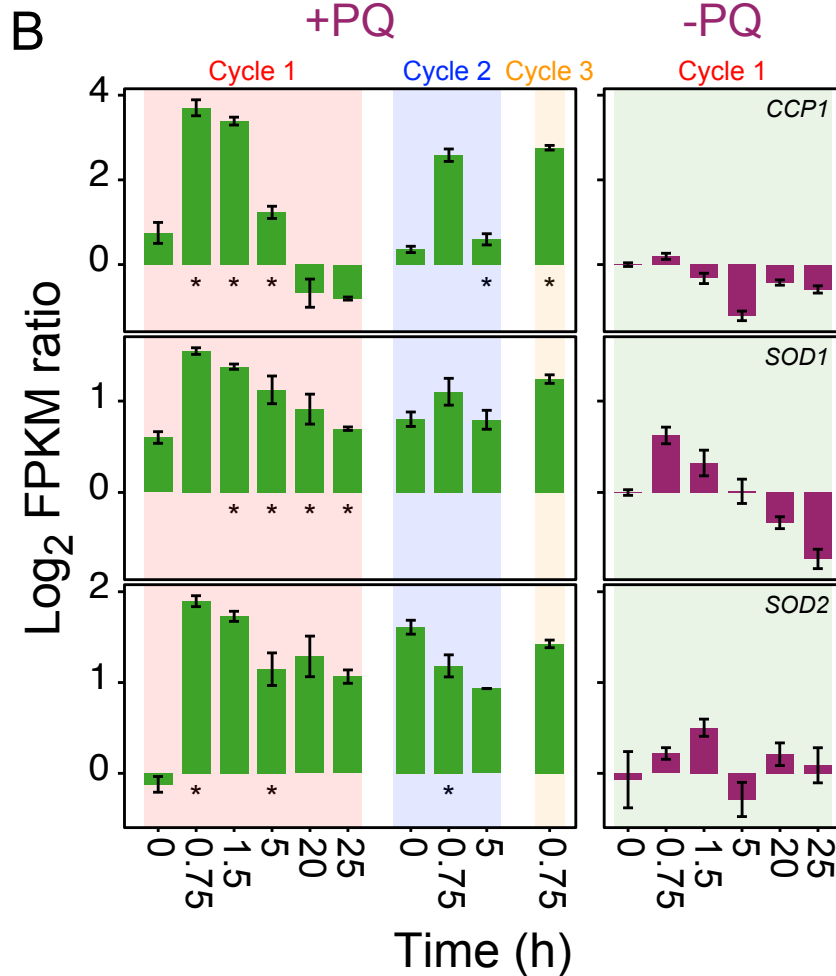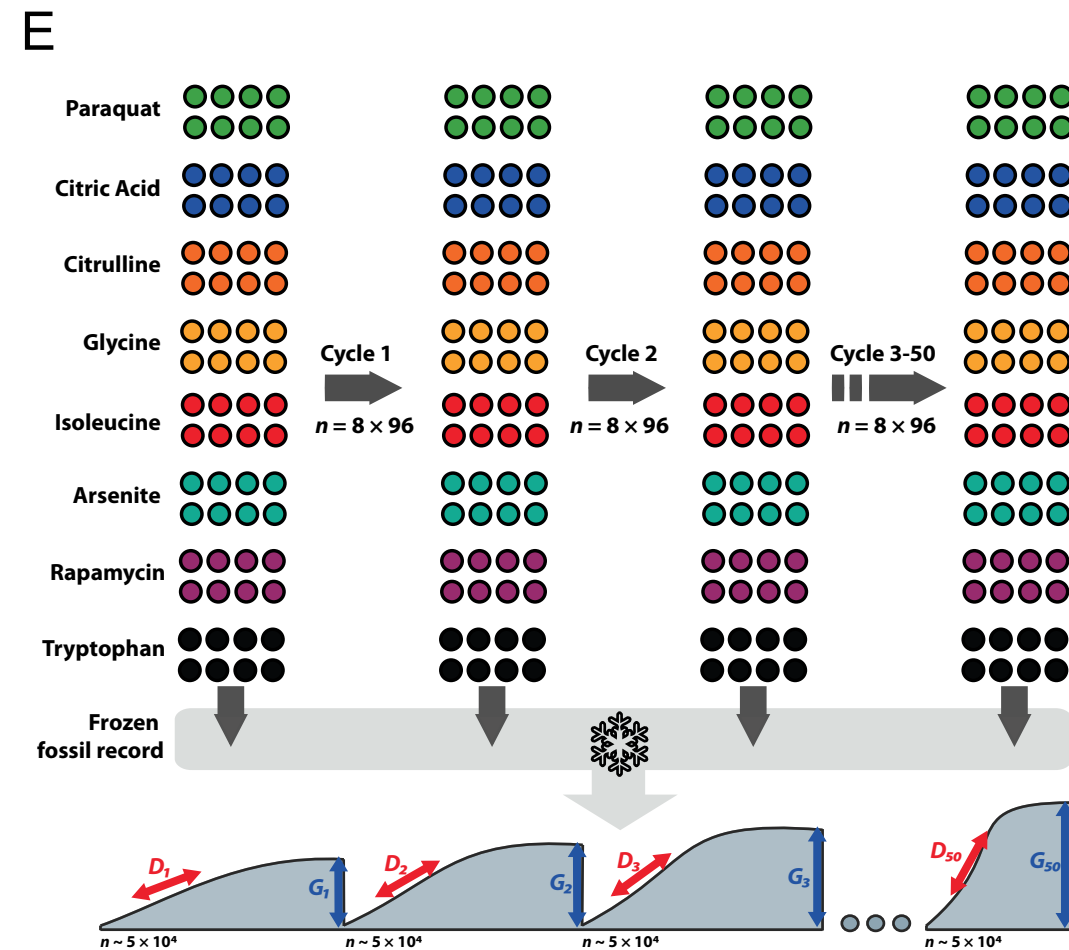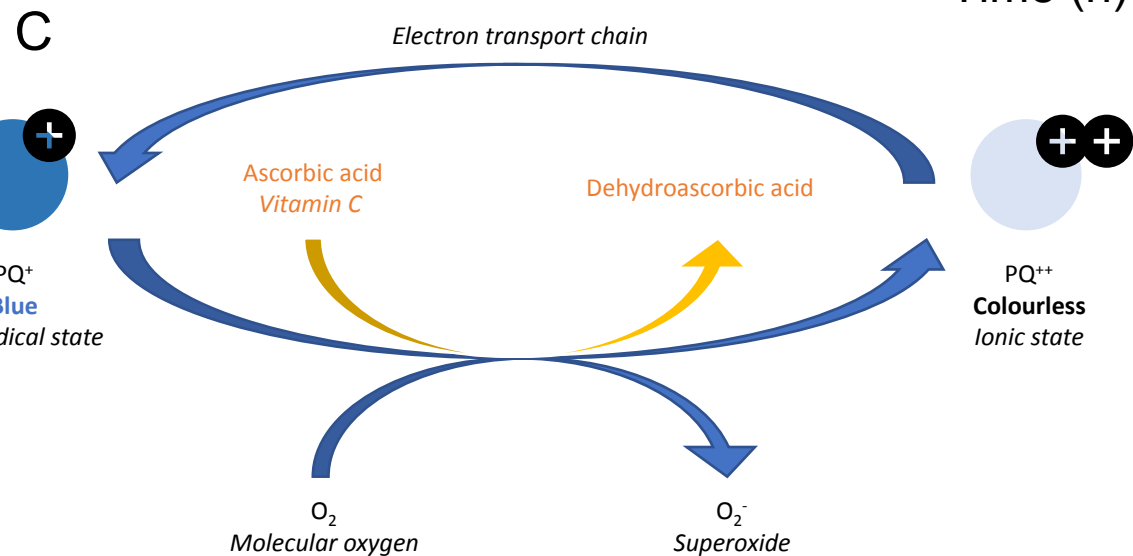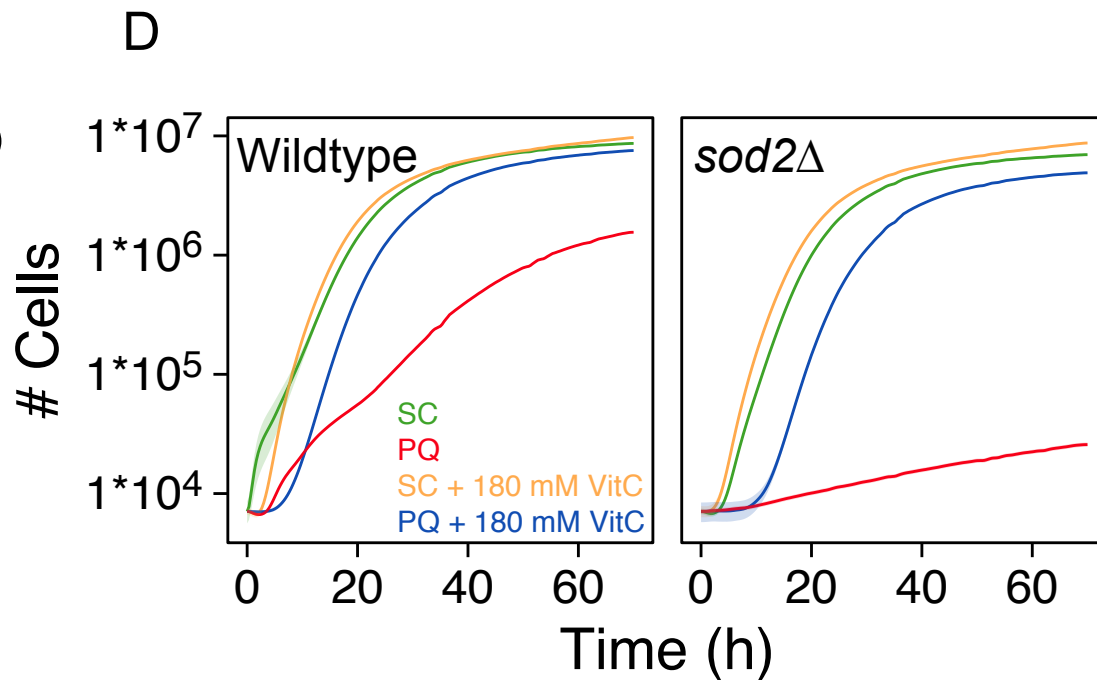

Supplement: supp [file elife-76095-supp-v1.zip]

D1

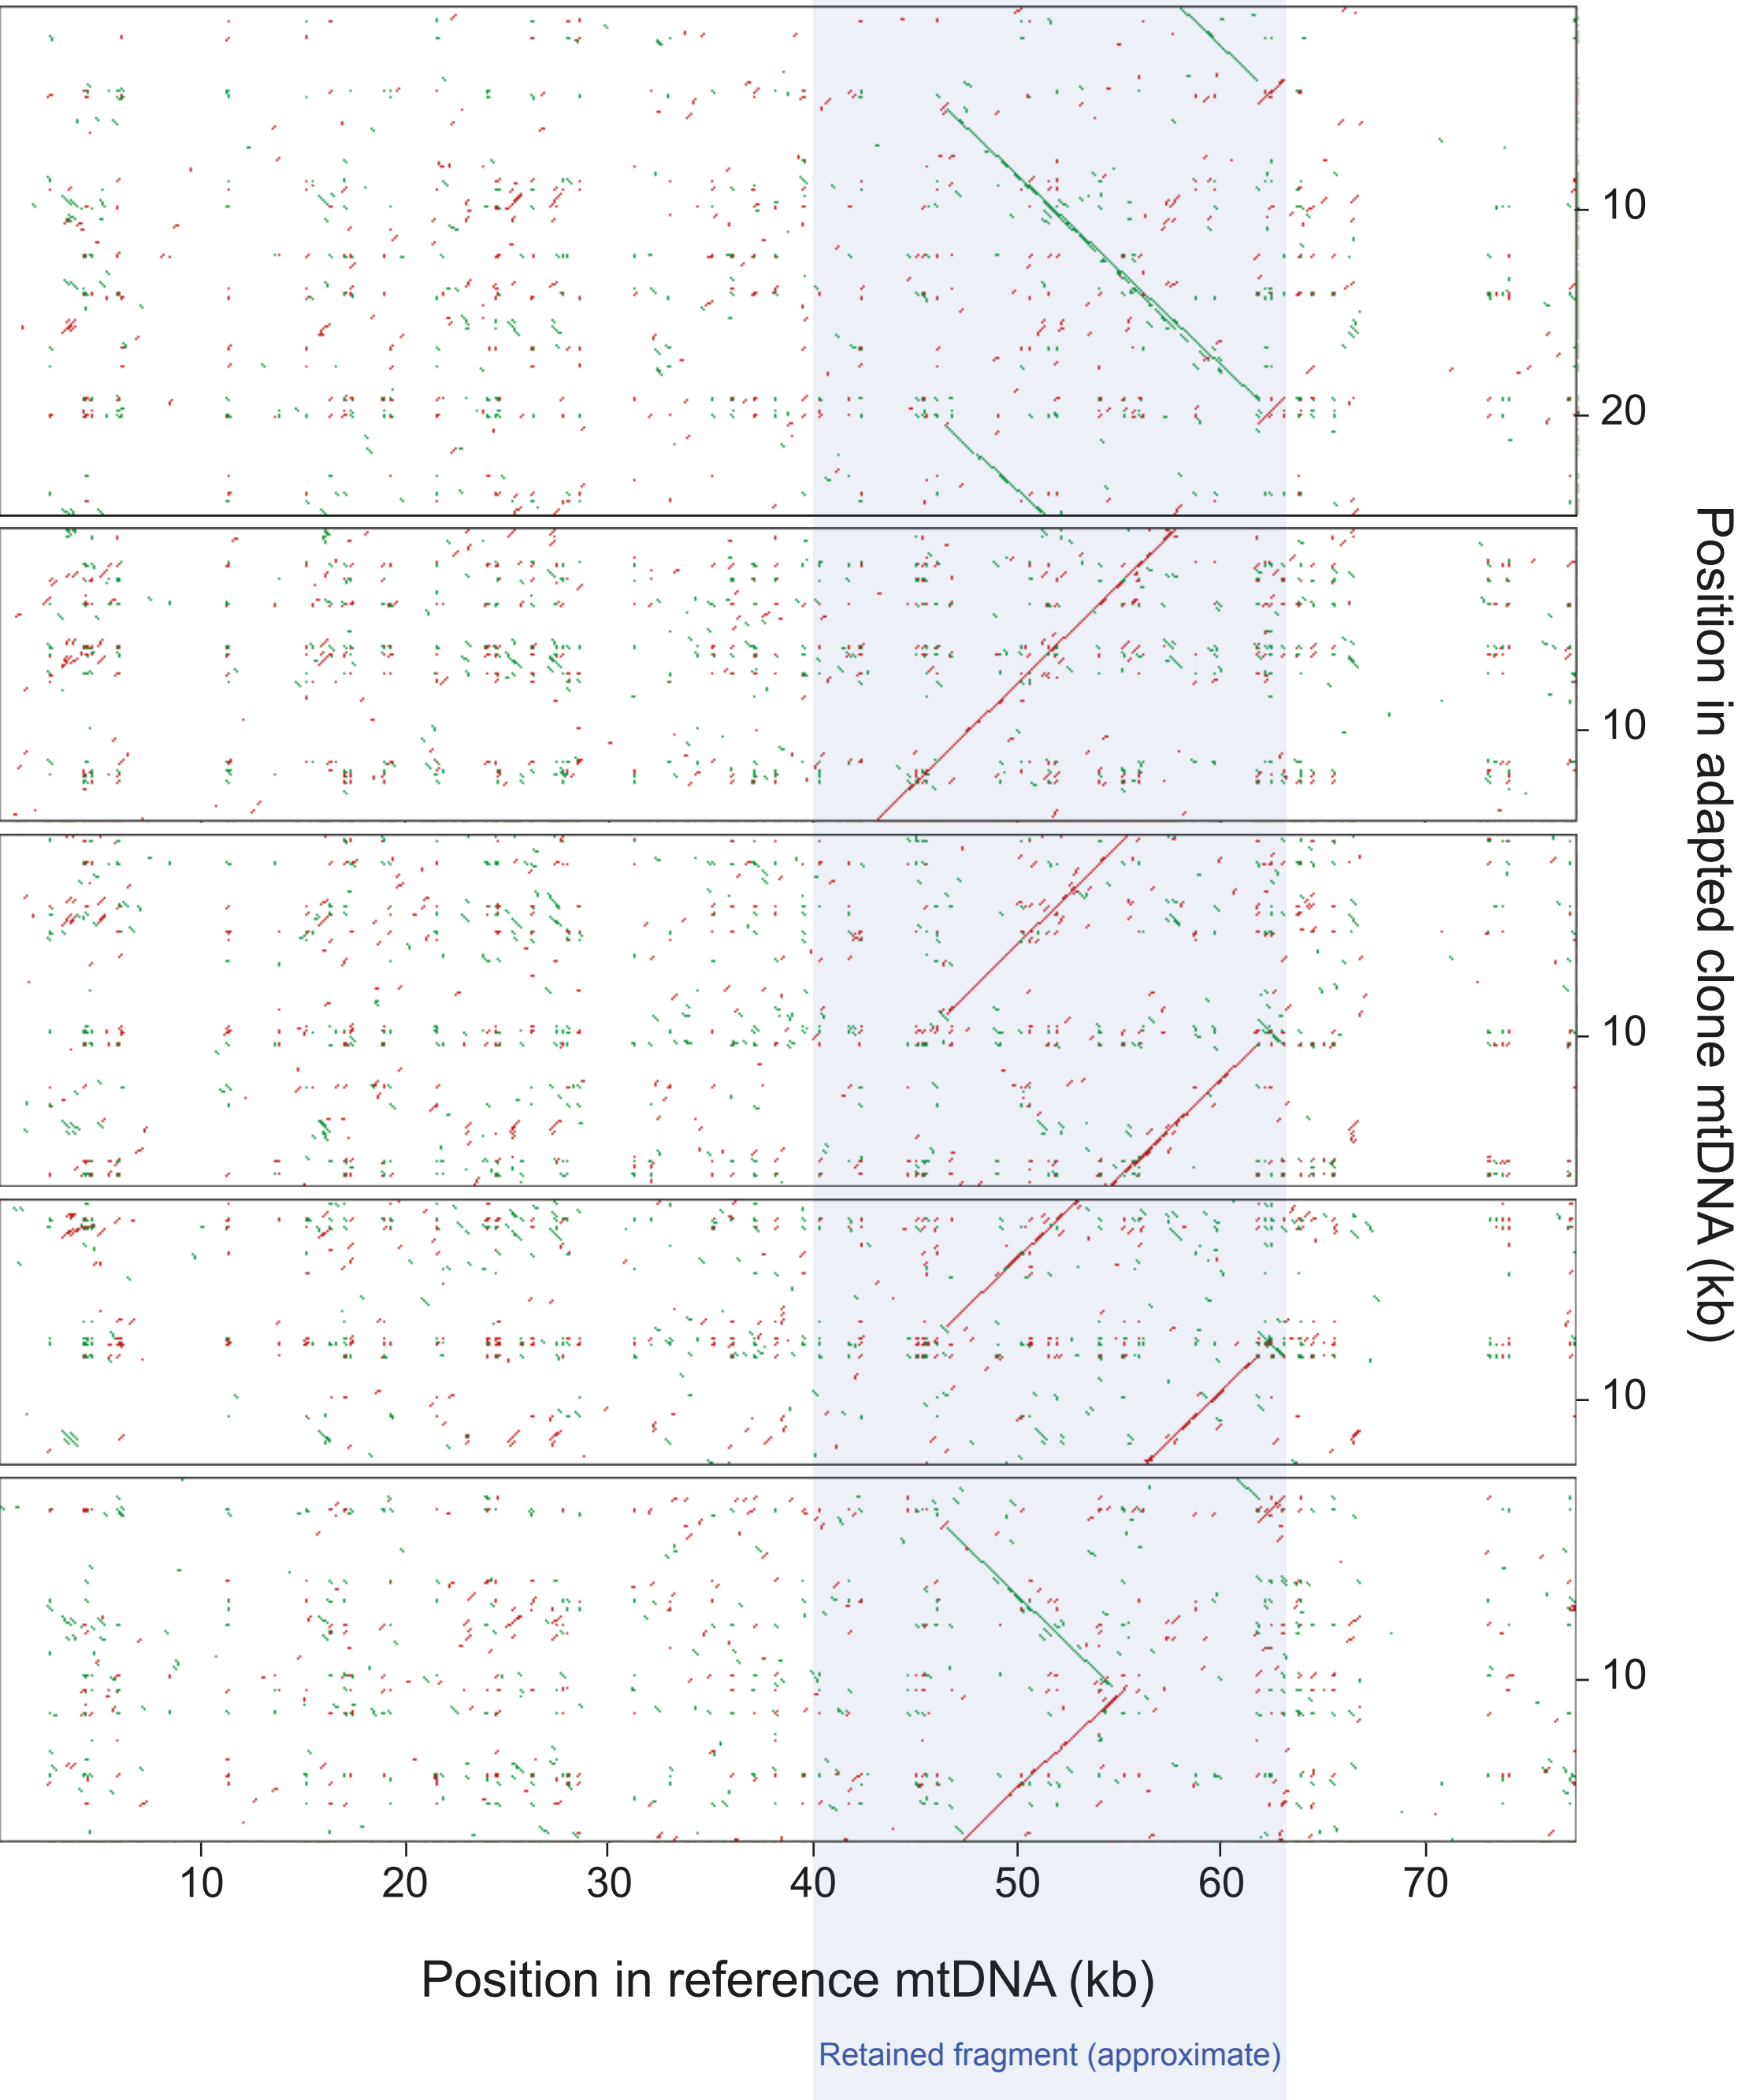

A7

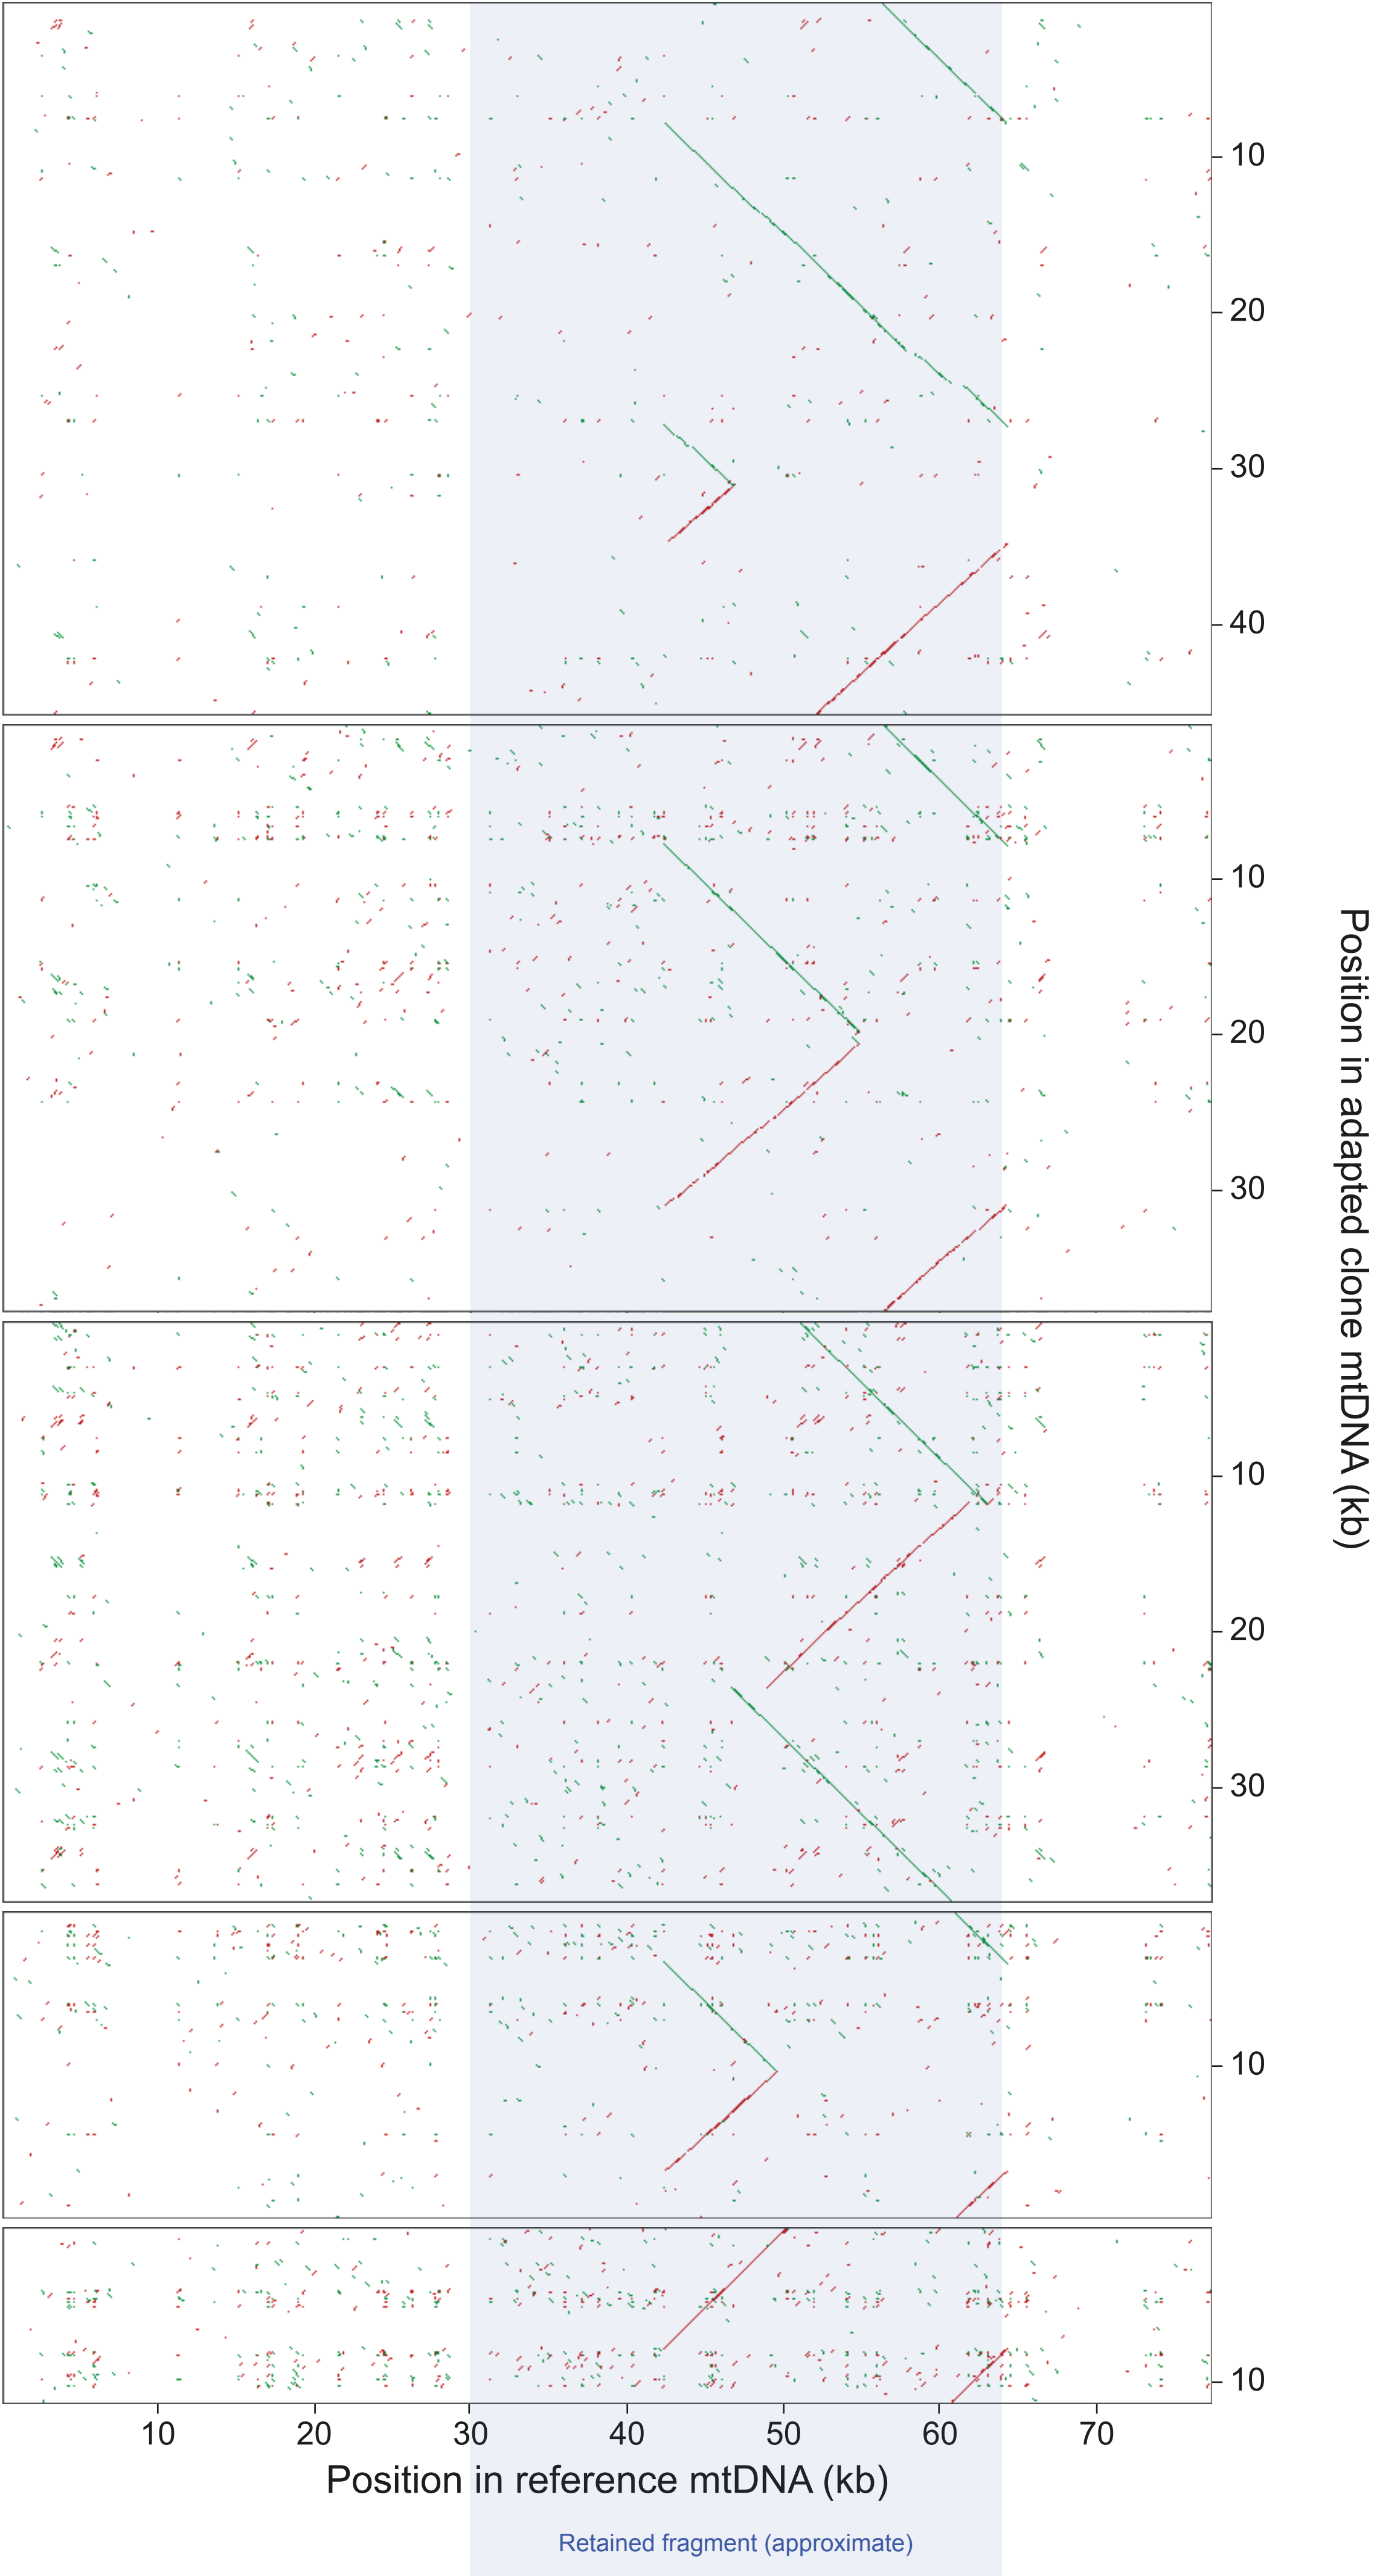

Supplement: supp [file elife-76095-supp-v1.zip]

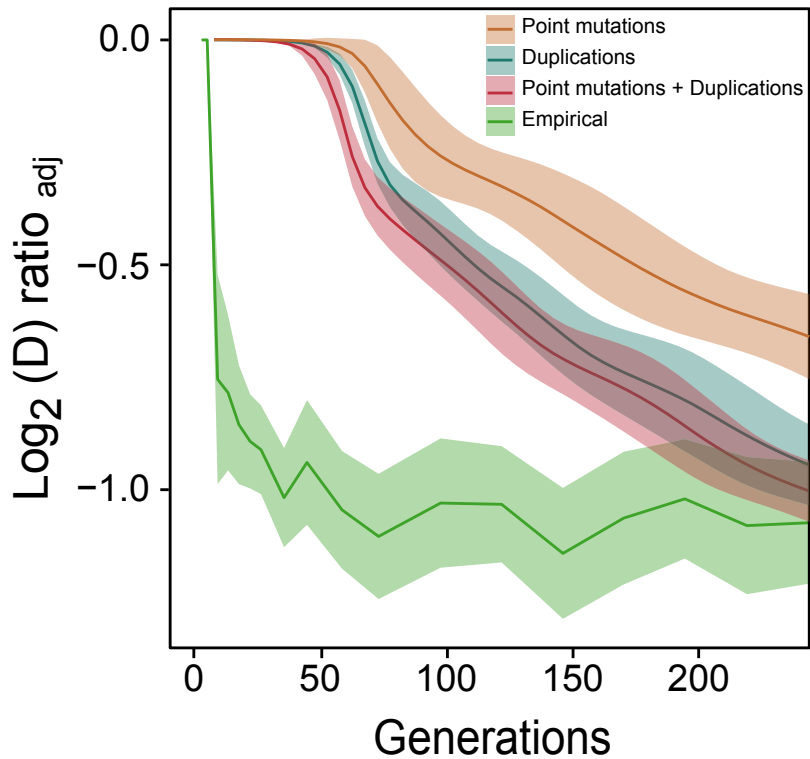

Supplement: supp [file elife-76095-supp-v1.zip]

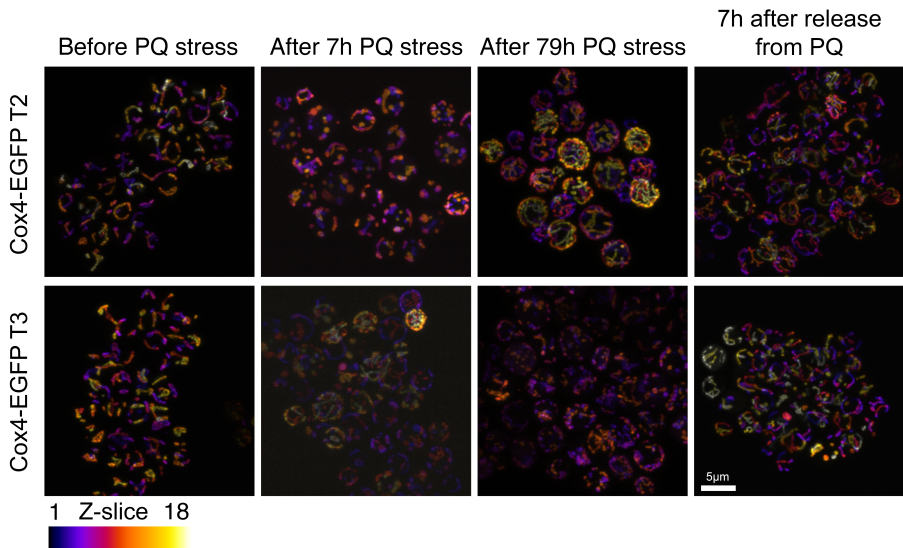

Supplement: supp [file elife-76095-supp-v1.zip]

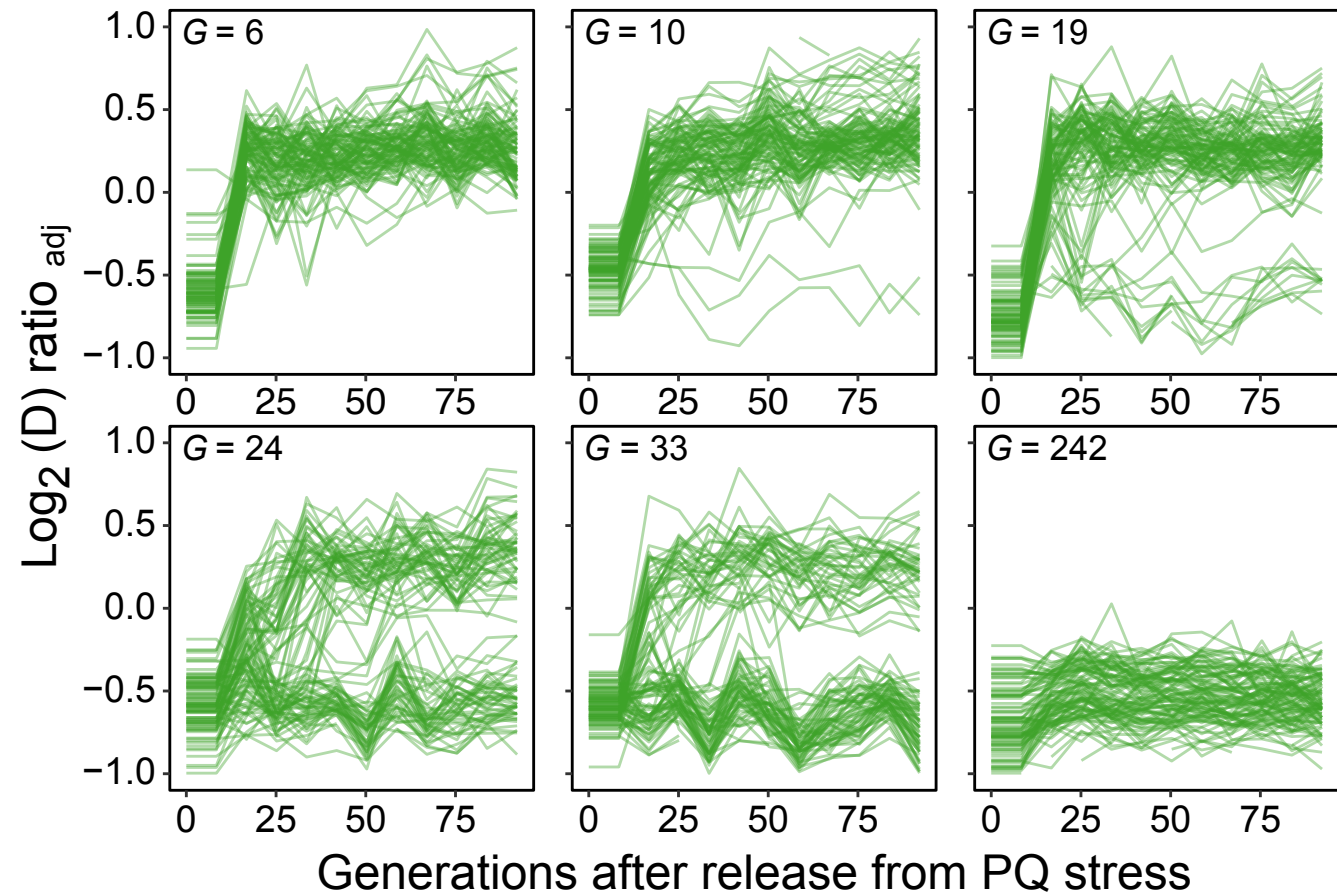

Supplement: supp [file elife-76095-supp-v1.zip]

**A**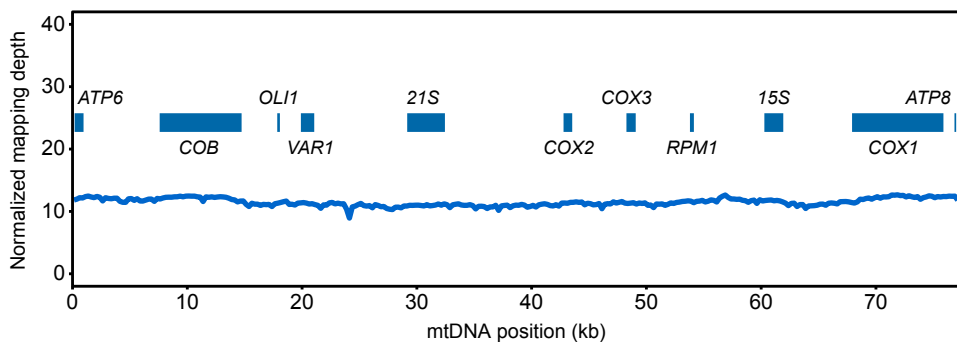**B**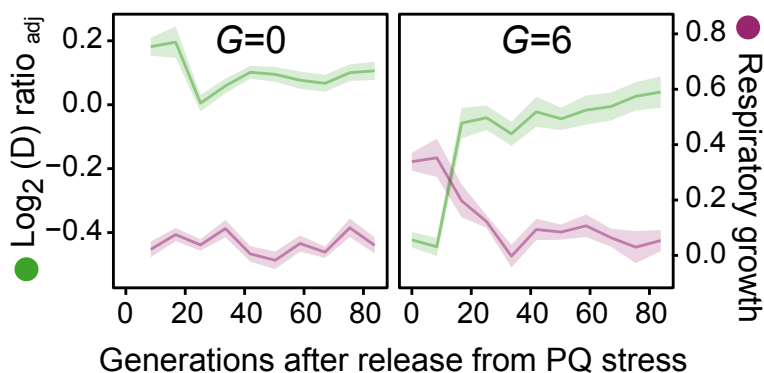**C**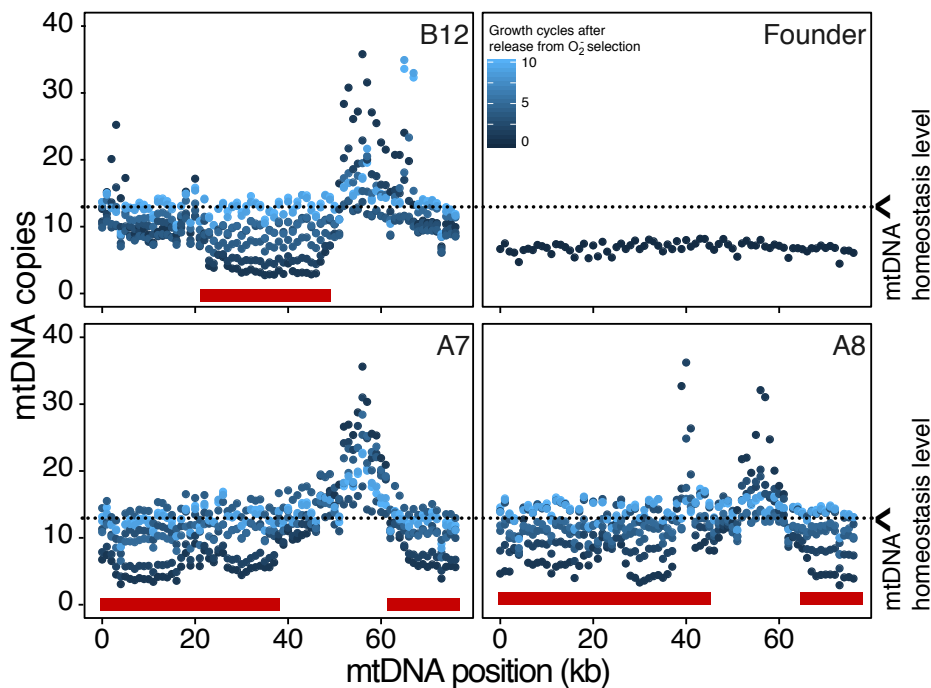

Supplement: supp [file elife-76095-supp-v1.zip]

**A**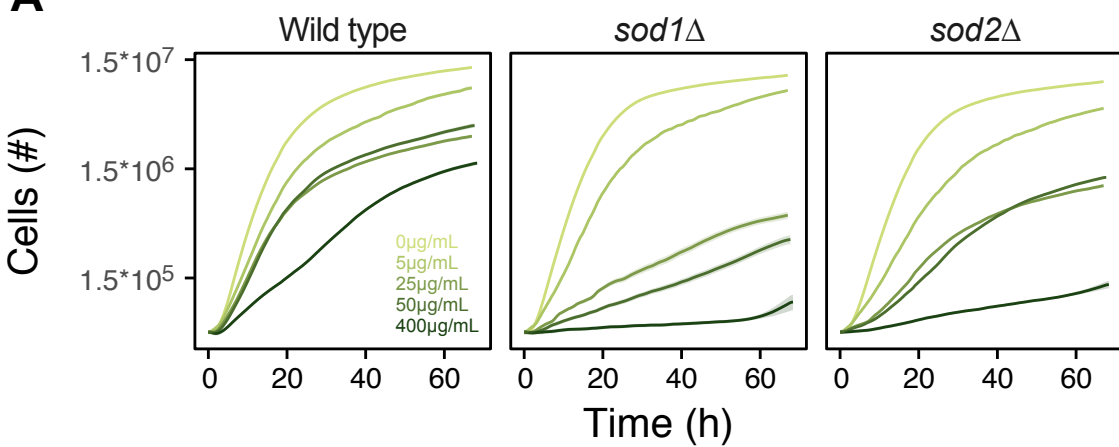**B**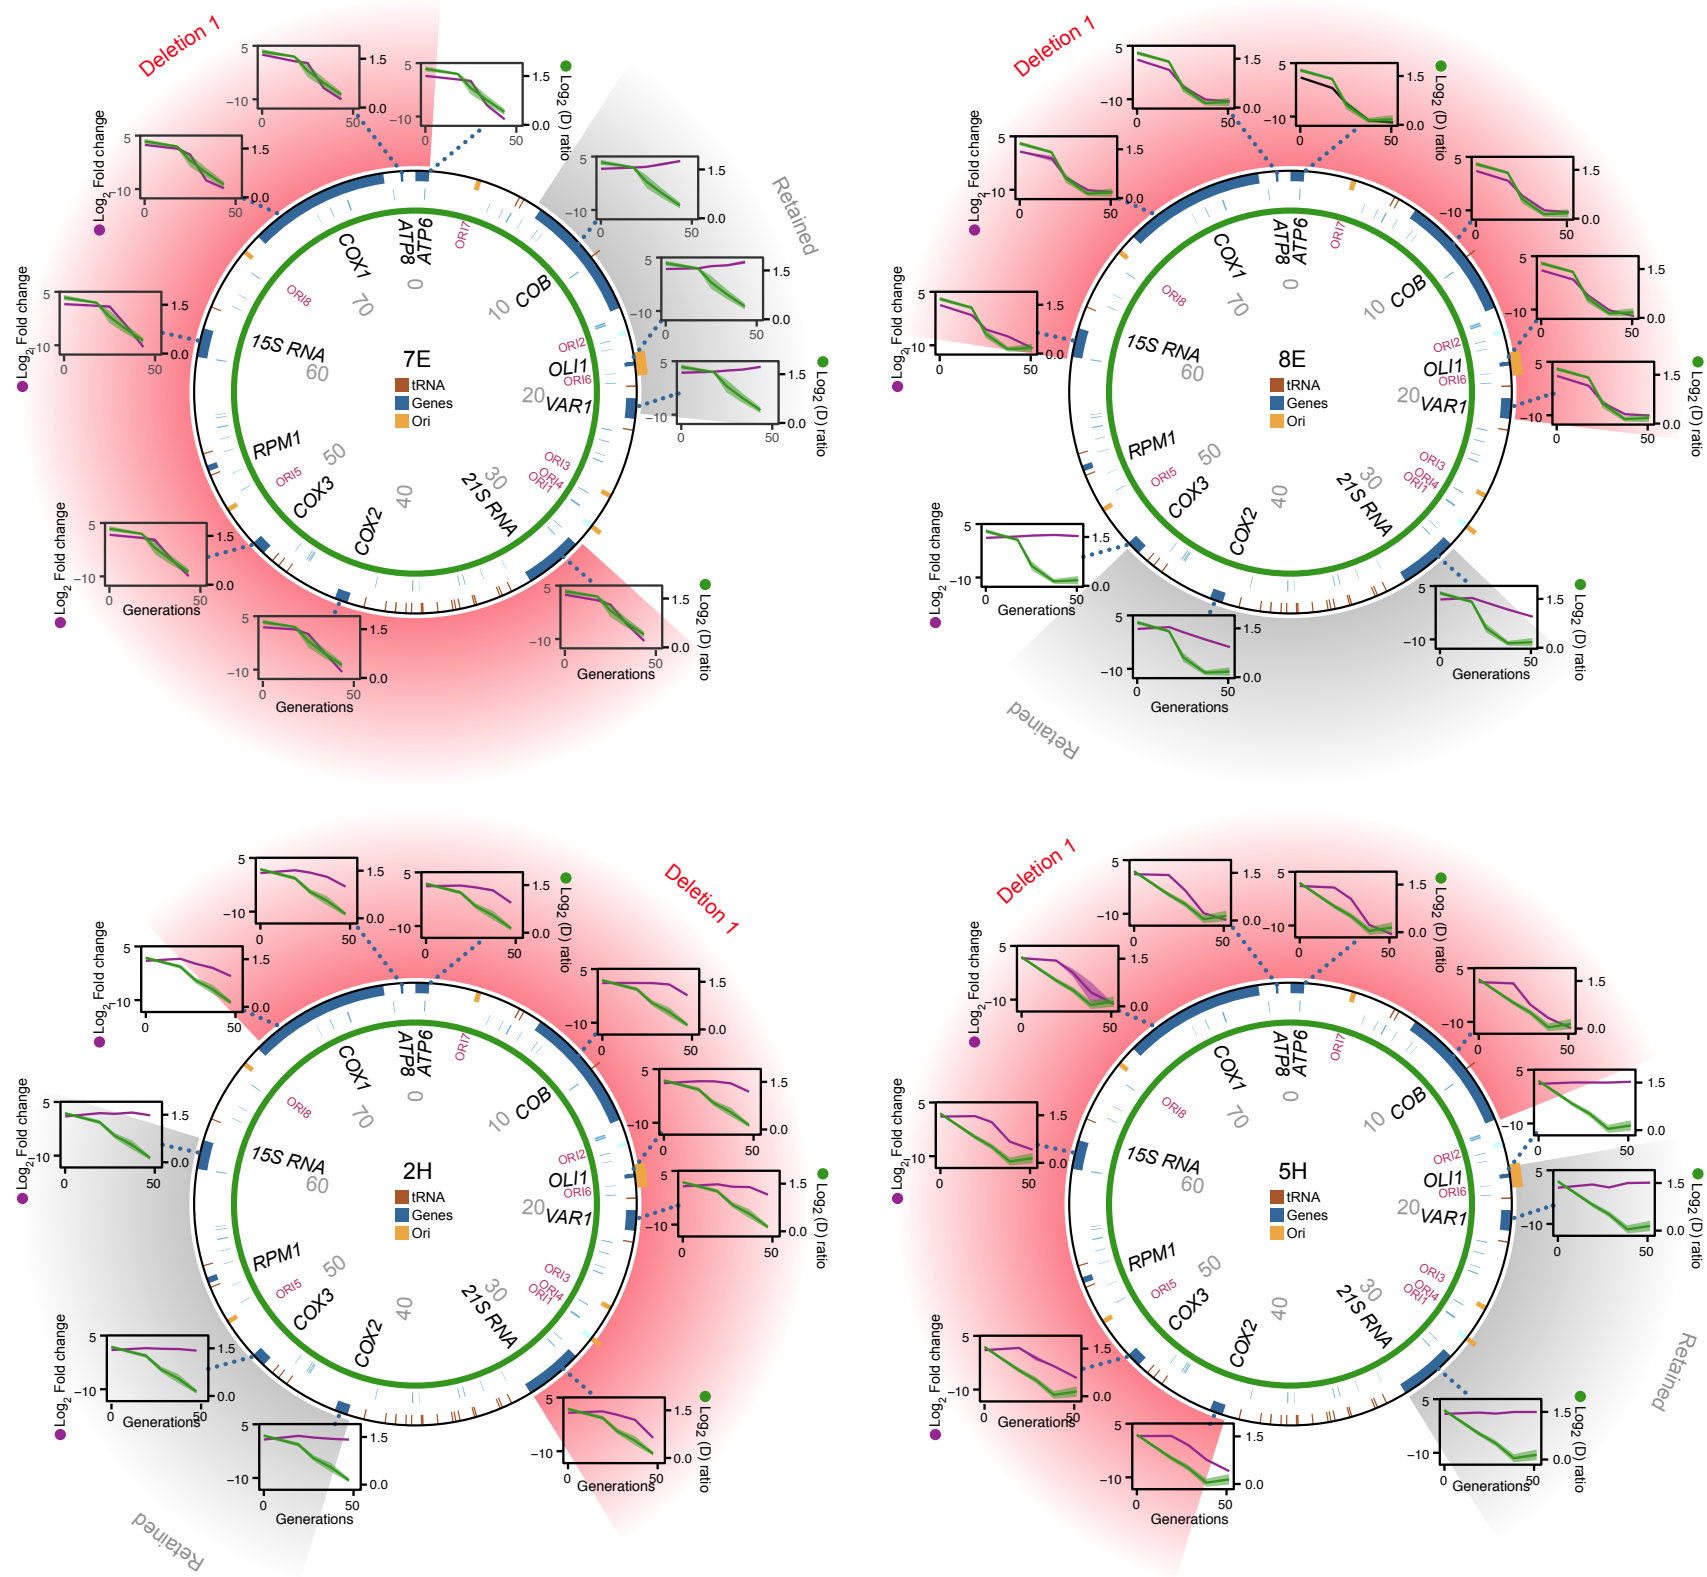

Supplement: supp [file elife-76095-supp-v1.zip › elife_poa_e76095_Figure_4_figure_supplement_1.pdf]

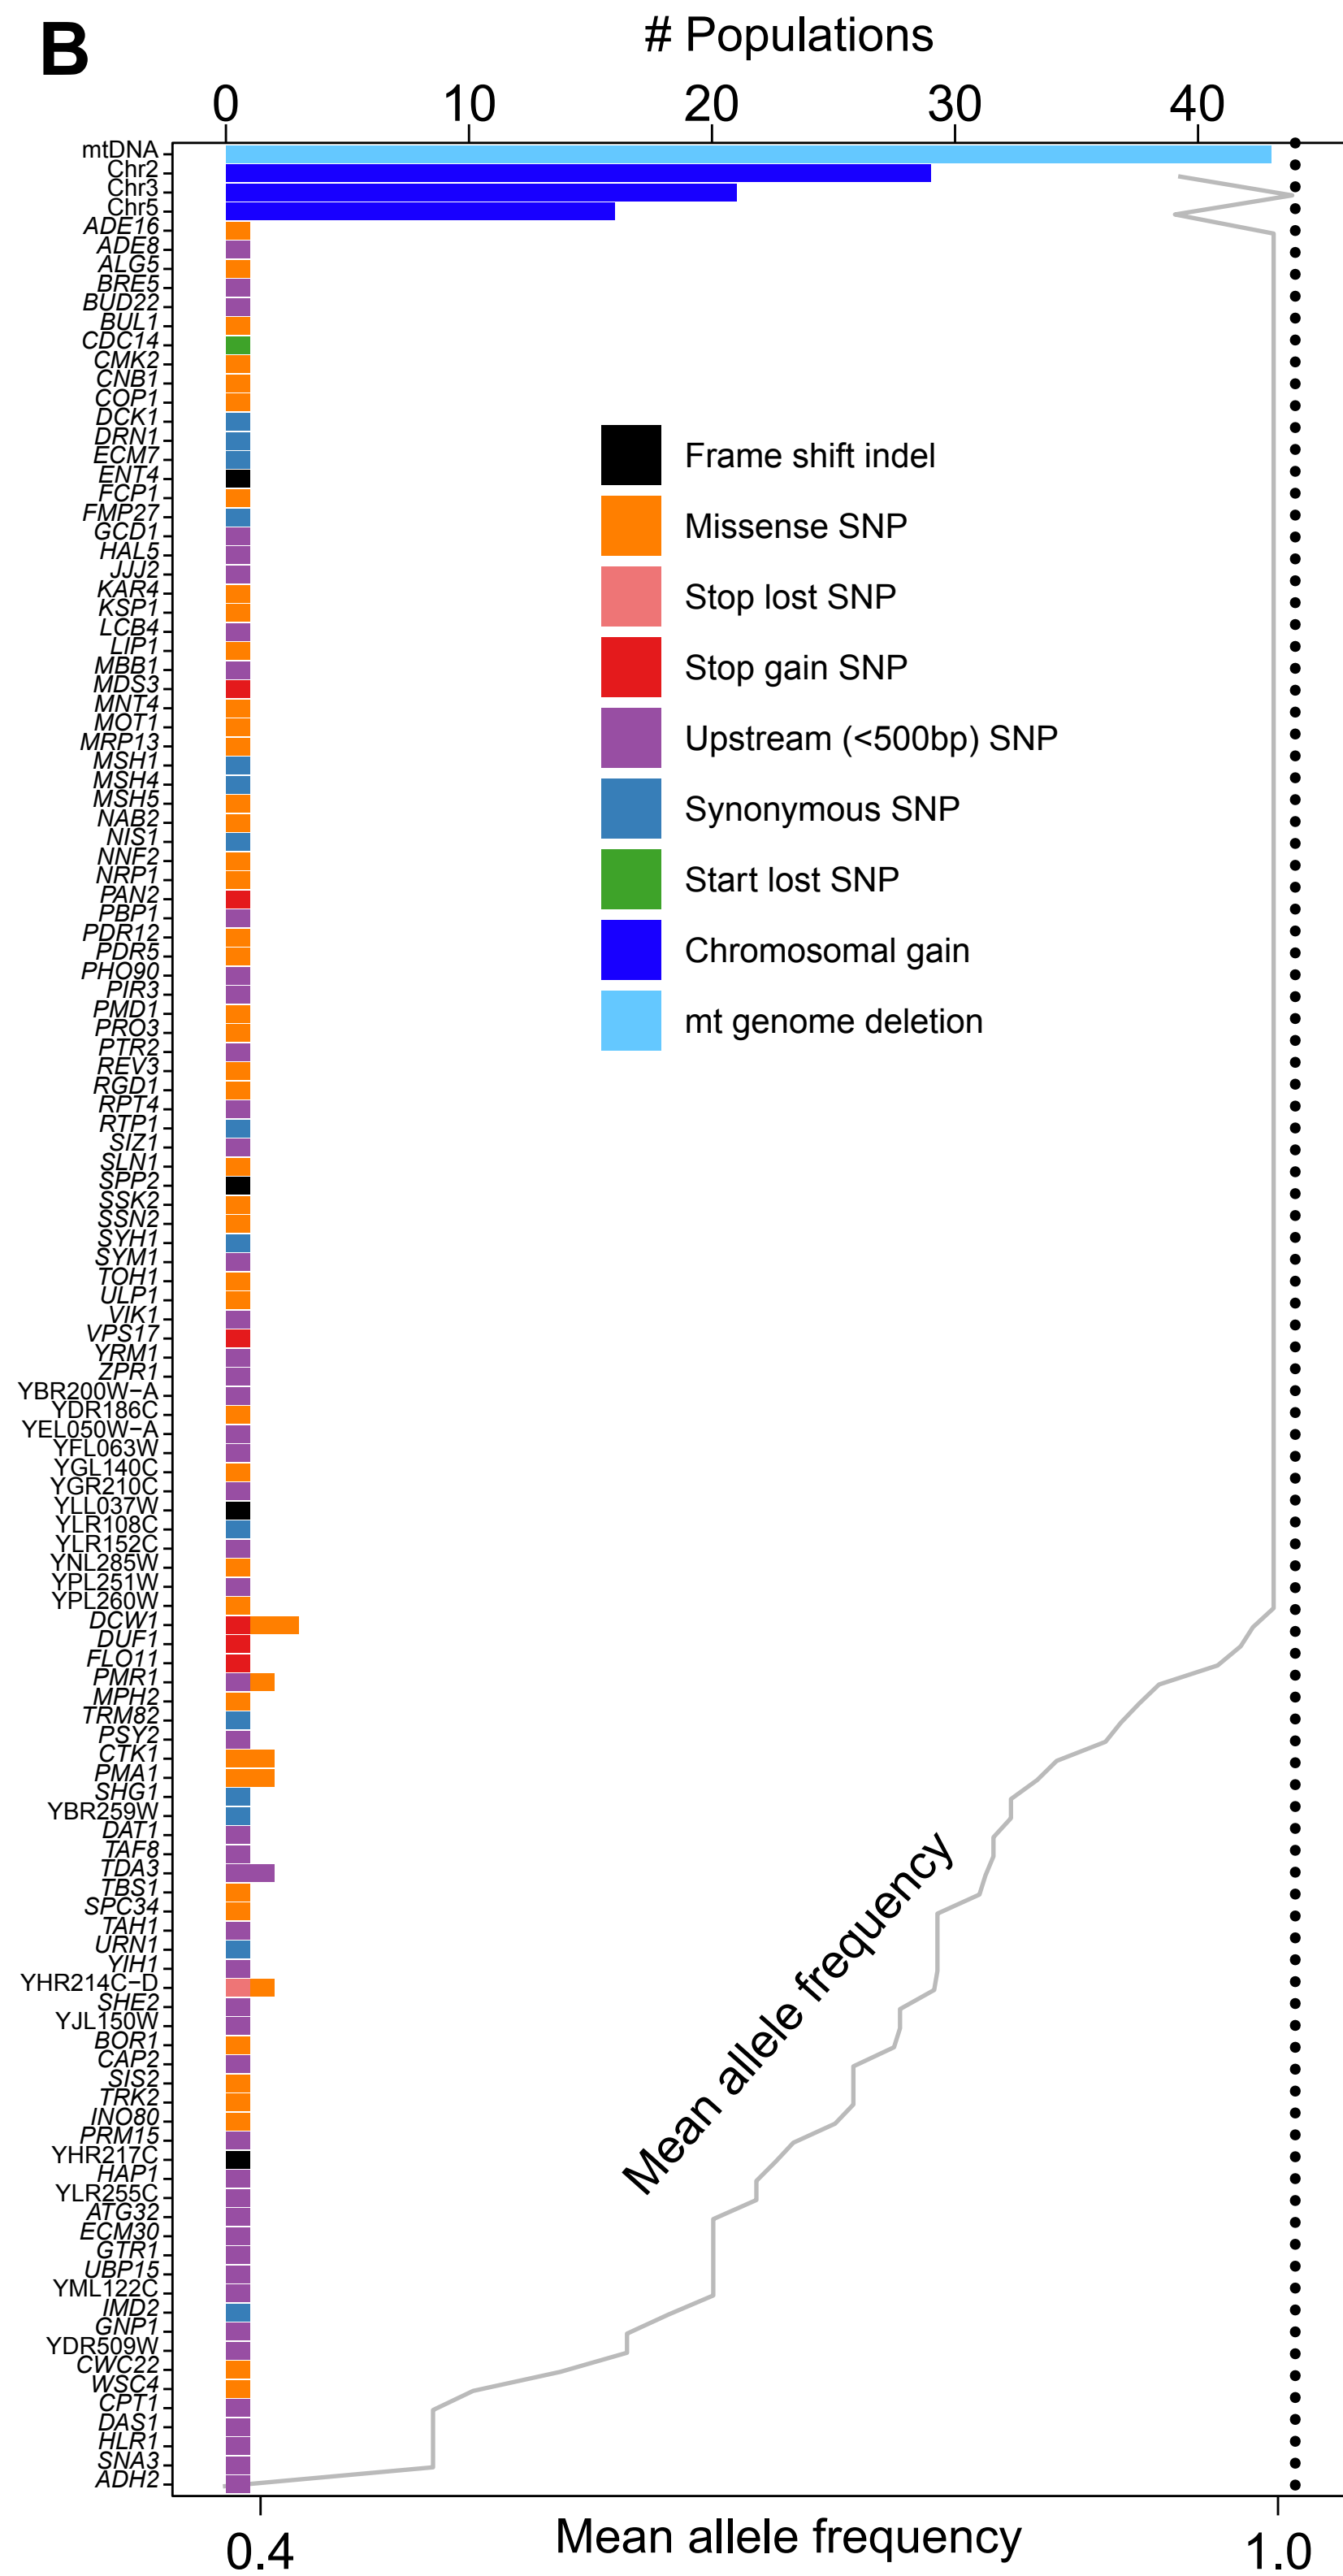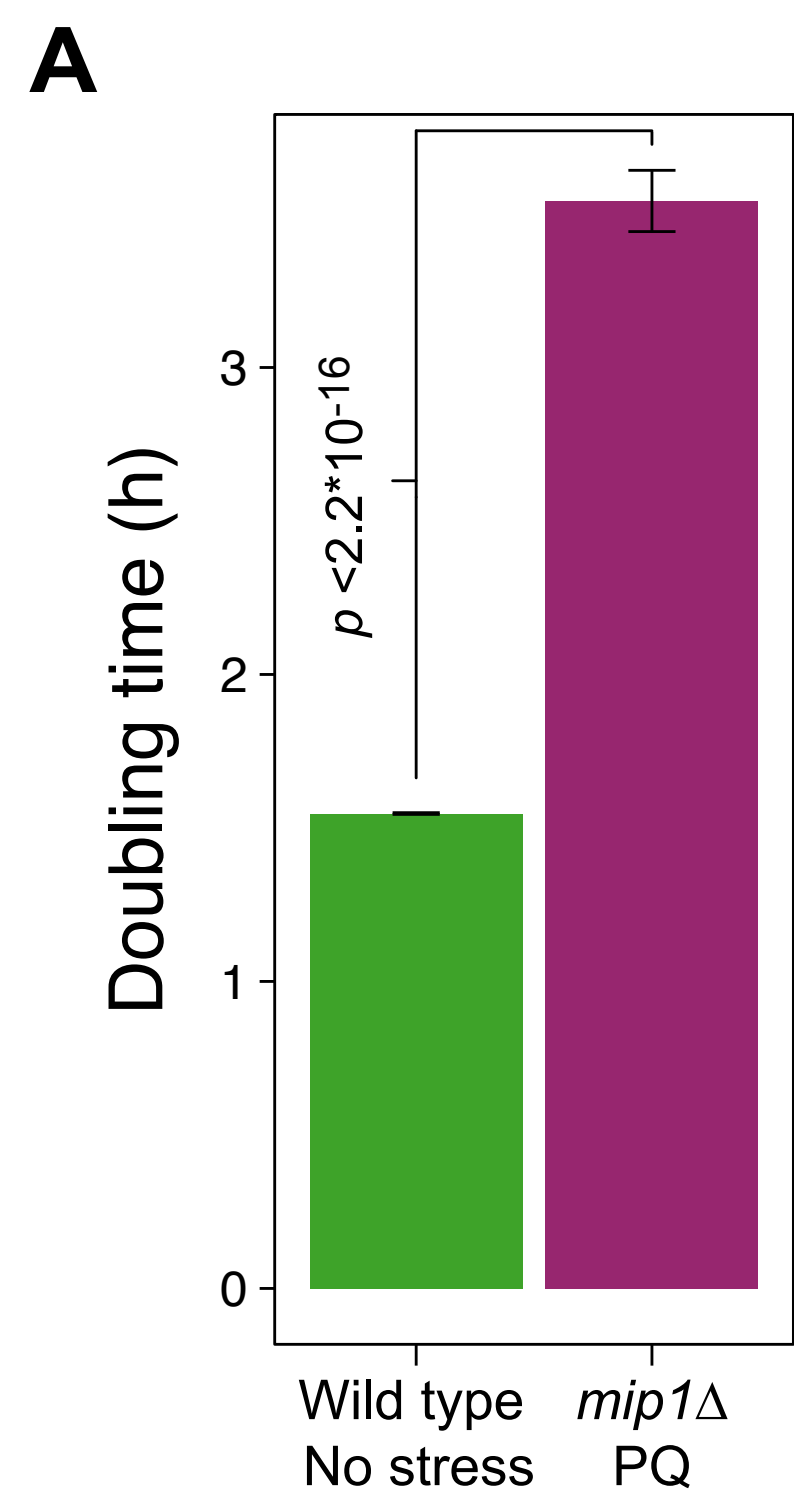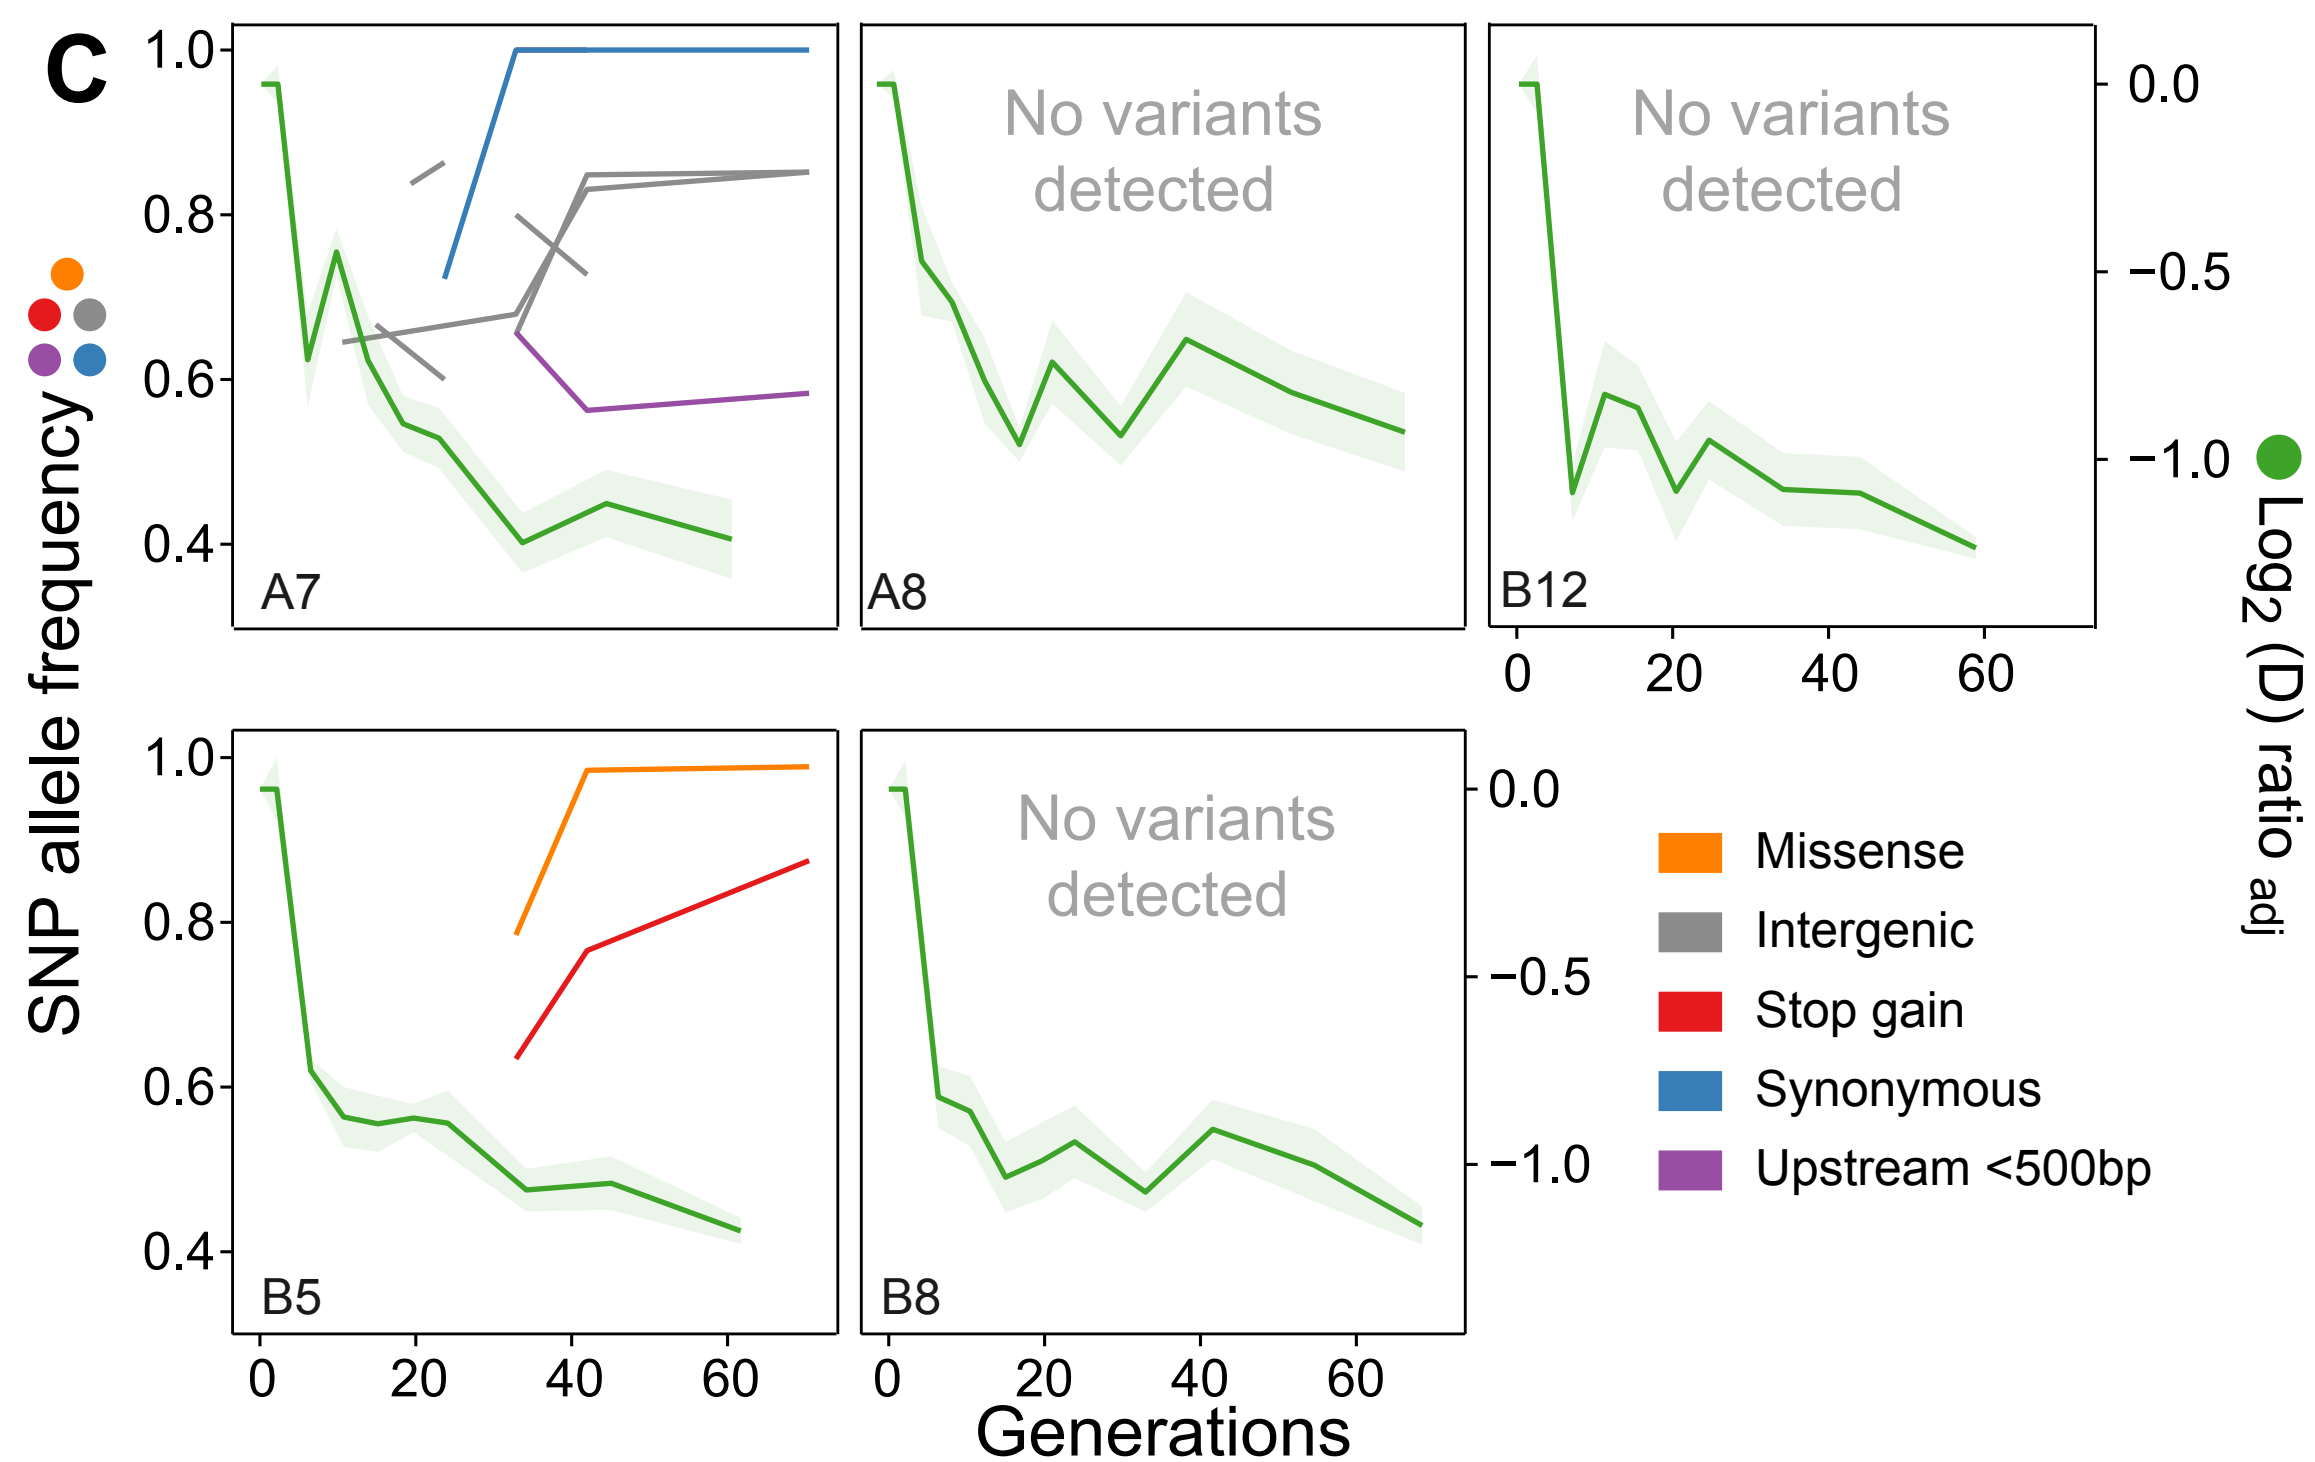

Supplement: supp [file elife-76095-supp-v1.zip › elife_poa_e76095_Figure_6_figure_supplement_4.pdf]
